# Supplementary material for: Transcriptomics Underlying Pulmonary Ozone Pathogenesis Regulated by Inflammatory Mediators in Mice
Source: MDPI journal article supplement (doi:10.3390/antiox10091489), 2021-09-18
Supplement: s1 [file s1]

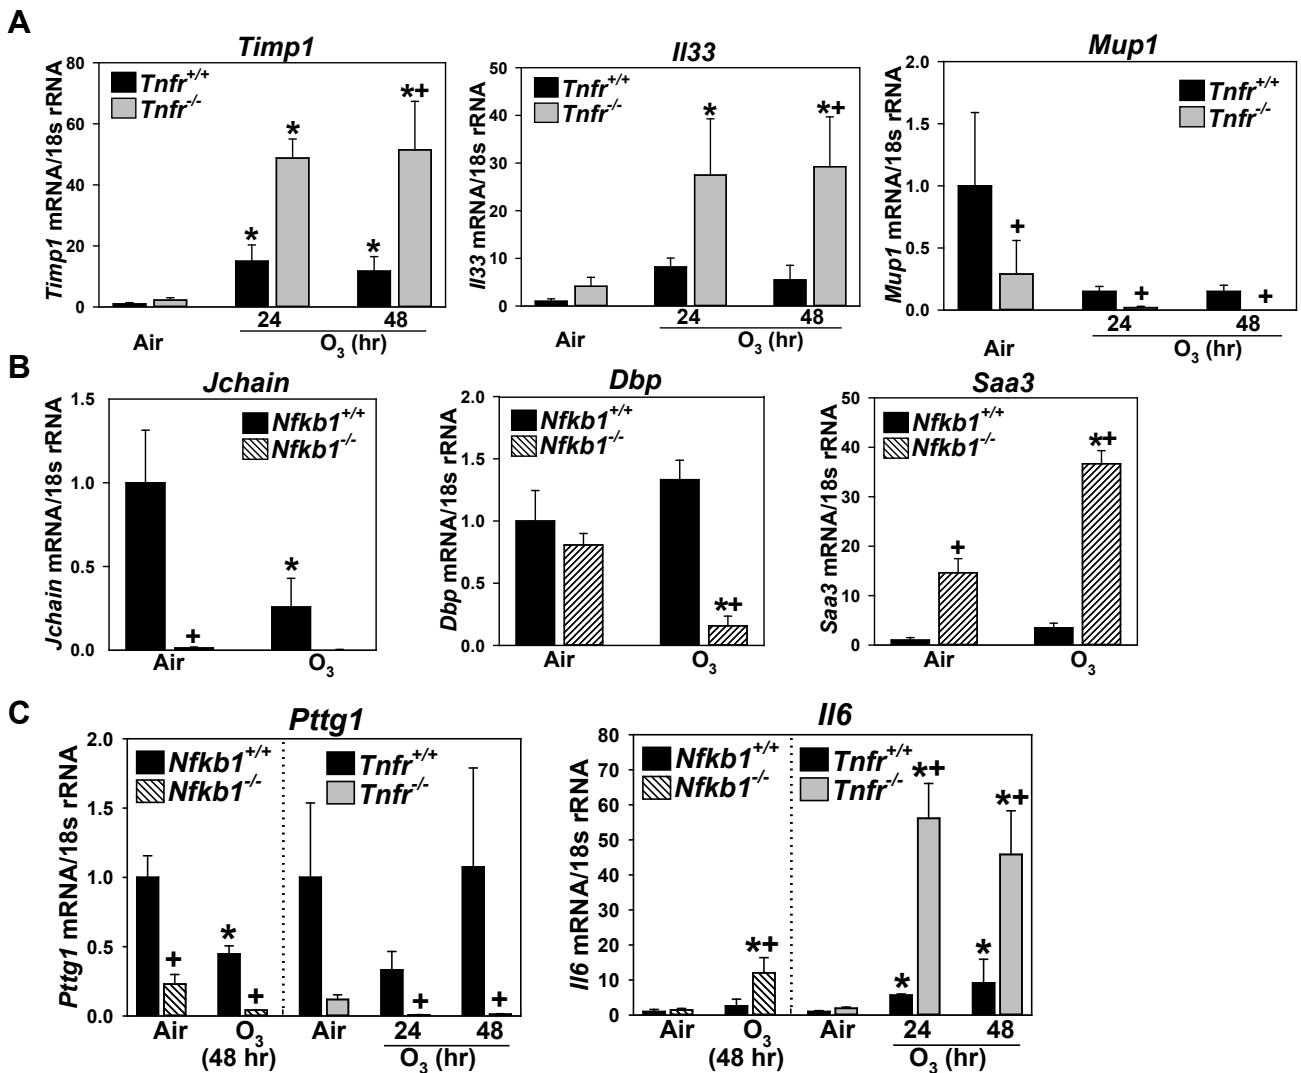

**Figure S1. Microarray analysis validation of tumor necrosis factor receptor (TNFR)- and NF- $\kappa$ B1-dependent transcriptomics in response to ozone (O<sub>3</sub>) by qRT-PCR.** (A) Differential transcript levels of TNFR-dependent tissue inhibitor of metalloproteinase 1 (*Timp1*), interleukin-33 (*Il33*) and major urinary protein 1 (*Mup1*) in *Tnfr*-deficient (*Tnfr*<sup>-/-</sup>) and wild-type (*Tnfr*<sup>+/+</sup>) mouse lungs by qRT-PCR. (B) Differential transcript levels of NF- $\kappa$ B1 (p50)-dependent immunoglobulin joining chain (*Jchain*), D site albumin promoter binding protein (*Dbp*) and serum amyloid A3 (*Saa3*) in *Nfkb1*-deficient (*Nfkb1*<sup>-/-</sup>) and wild-type (*Nfkb1*<sup>+/+</sup>) mouse lungs by qRT-PCR. (C) qRT-PCR also determined expression of common differentially regulated genes, pituitary tumor-transforming gene 1 (*Pttg1*) and *Il6*, between *Tnfr*<sup>-/-</sup> and *Tnfr*<sup>+/+</sup> mice and *Nfkb1*<sup>-/-</sup> and *Nfkb1*<sup>+/+</sup> mice. 18s rRNA-normalized group means  $\pm$  S.E.M presented (n = 3/group). \*, significantly different from genotype-matched air control mice ( $p < 0.05$ ). +, significantly different from O<sub>3</sub>-exposed wild-type mice ( $p < 0.05$ ).

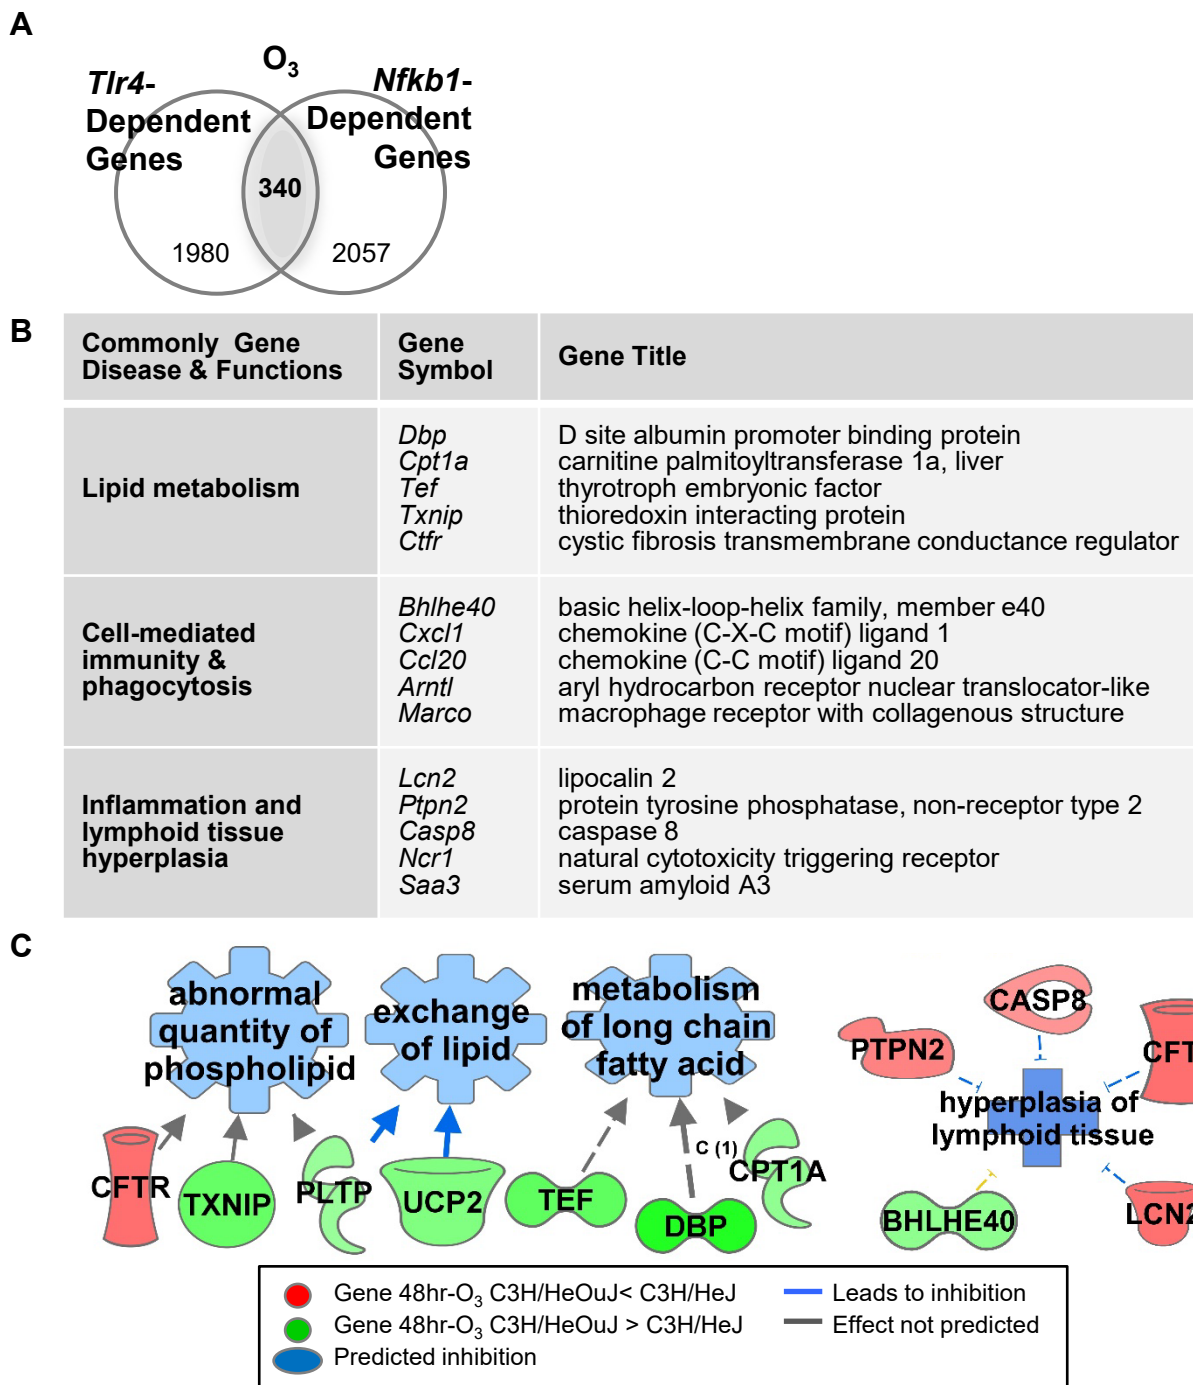

**Figure S2. Common differentially regulated lung genes by toll-like receptor 4 (TLR4) and NF- $\kappa$ B1 in response to ozone (O<sub>3</sub>).** (A) Venn Diagram analysis determined common O<sub>3</sub>-responsive genes differentially expressed between C3H/HeOuJ (*Tlr4*-normal) - C3H/HeJ (*Tlr4*-mutated) and wild-type (*Nfkb1*<sup>+/+</sup>) - *Nfkb1*-deficient (*Nfkb1*<sup>-/-</sup>) mice (n=340). (B) Pathway analysis determined functions and pathways of the common genes. (C) Common genes enriched to fatty acid metabolism included *Dbp* and *Cpt1a* and to cell-mediated immunity and inflammation included *Lcn2*, *Ccl20*, and *Casp8*. Molecule colors indicated relative expression levels in C3H/HeJ mice compared to C3H/HeOuJ mice after 48 hr exposure to 0.3-parts per million O<sub>3</sub>. Analyses were done using Ingenuity Pathway Analysis and GeneSpring software.

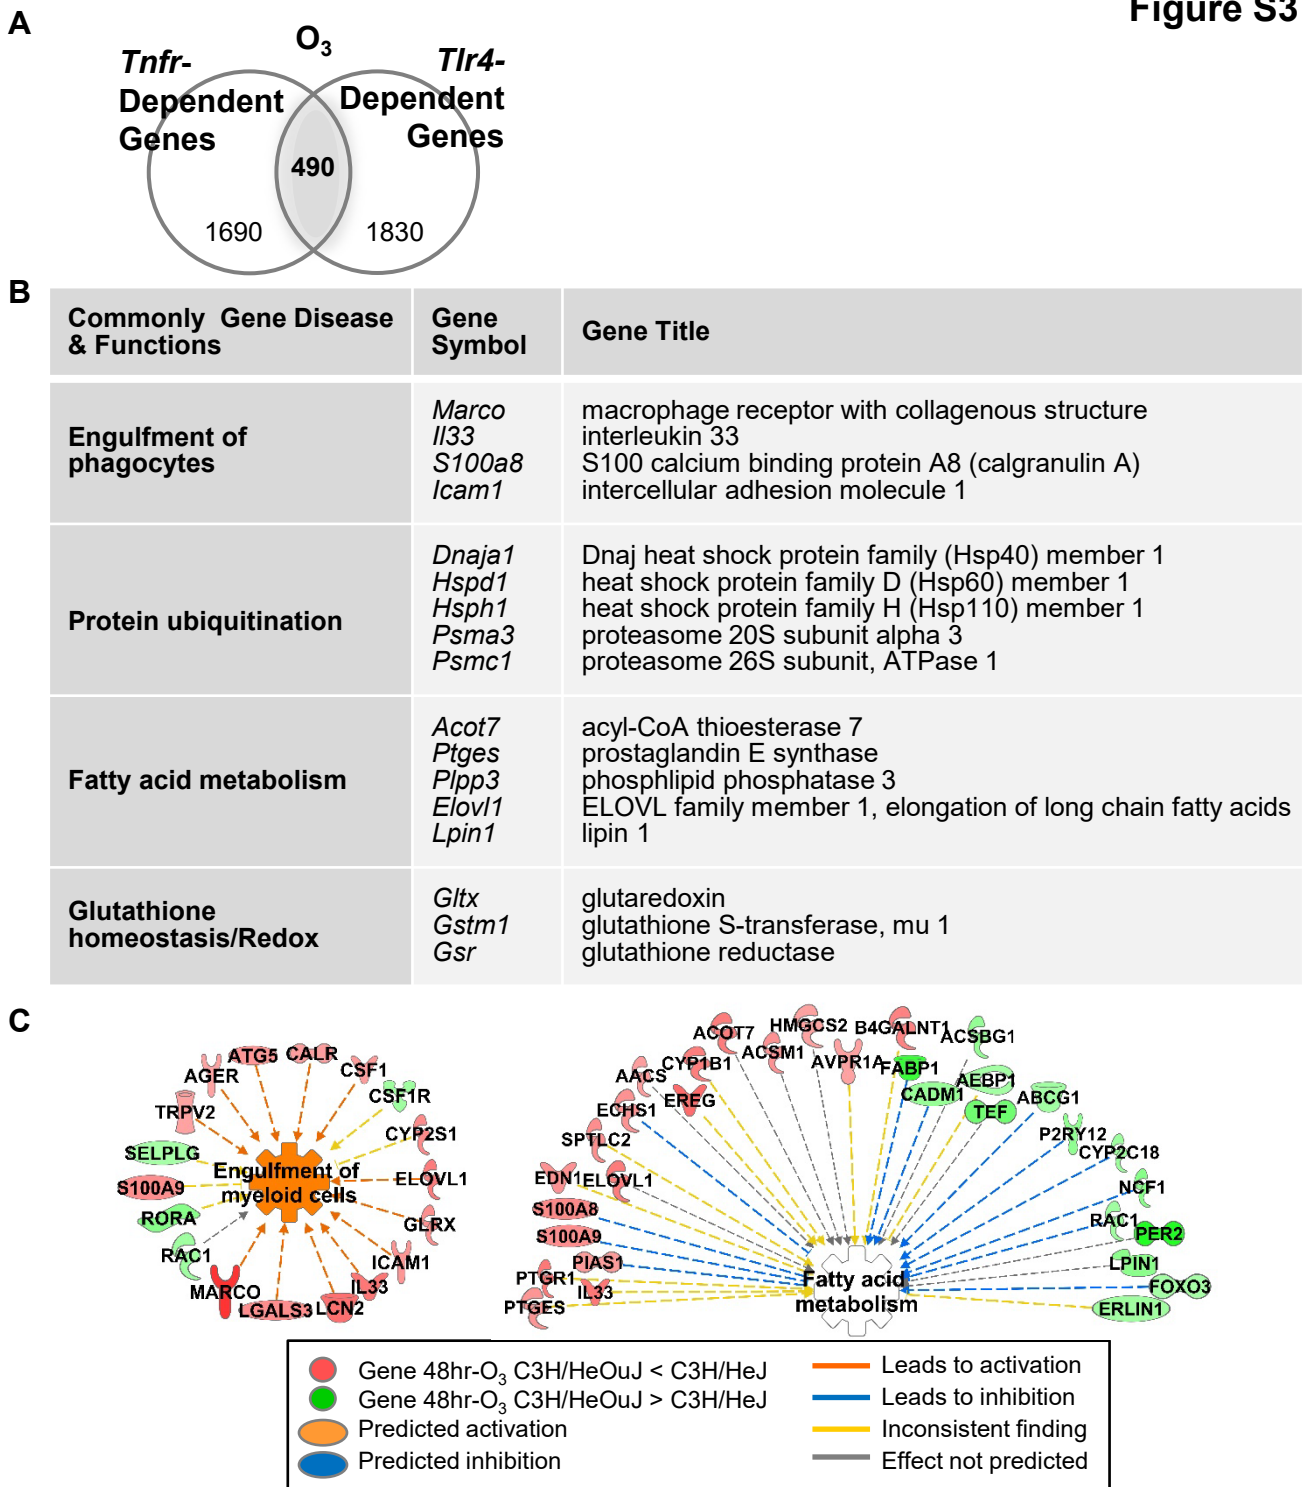

**Figure S3. Common differentially regulated lung genes by tumor necrosis factor receptor (TNFR) and toll-like receptor 4 (TLR4) in response to ozone ( $O_3$ ).** (A) Venn Diagram analysis determined common  $O_3$ -responsive genes differentially expressed between wild-type ( $Tnfr^{+/+}$ ) -  $Tnfr$ -deficient ( $Tnfr^{-/-}$ ) mice and C3H/HeOuJ ( $Tlr4$ -normal) - C3H/HeJ ( $Tlr4$ -mutated) mice (n=490). (B-C) Pathway analysis determined top functions and pathways of the common genes. Common genes enriched to phagocytosis included *Marco*, *Il33*, and *Icam1*, to protein ubiquitination included *Dnaja1*, *Hspd1*, and *Psm3*, and to fatty acid metabolism included *Acot7*, *Ptges*, and *Elov1*. Molecule colors indicated relative expression levels in C3H/HeJ mice compared to C3H/HeOuJ mice after 48 hr exposure to 0.3-parts per million  $O_3$ . Analyses were done using Ingenuity Pathway Analysis and GeneSpring software.

**Table S1. Time-dependent changes in lung genes by 0.3-parts per million (ppm) ozone (O<sub>3</sub>) exposure in C57BL/6J mice.**

| RefSeq       | Transcript ID     | p (24h n=60) | p (48h n=657) | p (72h n=805) | FC 24h      | FC 48h        | FC 72h                                    | Gene Symbol                                                                                                                                                                              | Gene Title                                                                                                                                                                                                                                                                                                                                                             | Gene Ontology Biological Process |
|--------------|-------------------|--------------|---------------|---------------|-------------|---------------|-------------------------------------------|------------------------------------------------------------------------------------------------------------------------------------------------------------------------------------------|------------------------------------------------------------------------------------------------------------------------------------------------------------------------------------------------------------------------------------------------------------------------------------------------------------------------------------------------------------------------|----------------------------------|
| NM_001177544 | /NM_178185        | 1.00E-05     | 4.27E-05      | -1.16         | 3.50        | 6.89          | <b>Hist1h2ooa//Hist1h2op</b>              | histone cluster 1, H2ao//histone cluster 1, H2ap                                                                                                                                         | 0006325 // chromatin organization // not recorded//0006342 // chromatin silencing // not recorded//0008285 // negative regulation of cell proliferation // not recorded                                                                                                                                                                                                |                                  |
| NM_020509    | 8.10E-06          | 3.30E-07     | 2.00E-07      | <b>4.32</b>   | <b>6.65</b> | <b>6.74</b>   | <b>Retna1</b>                             | retinoid like alpha                                                                                                                                                                      | 0005179 // hormone activity // inferred from electronic annotation                                                                                                                                                                                                                                                                                                     |                                  |
| NM_009264    | 1.38E-04          | 4.10E-05     | 1.01E-05      | <b>2.26</b>   | <b>4.46</b> | <b>5.56</b>   | <b>Spr1a</b>                              | small proline-rich protein 1A                                                                                                                                                            | 0018149 // peptide cross-linking // not recorded//0030216 // keratinocyte differentiation // not recorded//0031424 // keratinization // inferred from electronic annotation                                                                                                                                                                                            |                                  |
| NM_029796    | 1.43E-05          | 2.85E-07     | 5.28E-05      | <b>2.29</b>   | <b>3.20</b> | <b>4.12</b>   | <b>Lrp1</b>                               | leucine-rich alpha-2-glycoprotein 1                                                                                                                                                      | 0001938 // positive regulation of endothelial cell proliferation // inferred from mutant phenotype//0030511 // positive regulation of transforming growth factor beta receptor signaling                                                                                                                                                                               |                                  |
| NM_001044384 | /NM_760E-07       | 1.43E-07     | 8.61E-08      | <b>3.40</b>   | <b>4.45</b> | <b>3.94</b>   | <b>Timp1</b>                              | tissue inhibitor of metalloproteinase 1                                                                                                                                                  | 0001775 // cell activation // not recorded//0007568 // aging // inferred from electronic annotation//0008284 // positive regulation of cell proliferation // not recorded//0009725 // 0002078 // mitotic cell cycle // inferred from electronic annotation//0001556 // oocyte maturation // not recorded//0001701 // in utero embryonic development // inferred from n |                                  |
| NM_172301    | /NM_01            | 1.60E-04     | 1.99E-04      | -1.00         | <b>2.30</b> | <b>3.82</b>   | <b>Ccnb3//Gm5593</b>                      | cyclin B1//predicted gene 5593                                                                                                                                                           | 0002029 // protein polyubiquitination // not recorded//0006511 // ubiquitin-dependent protein catabolic process // not recorded//0007049 // cell cycle // inferred from electronic ;                                                                                                                                                                                   |                                  |
| NM_026785    | 5.76E-06          | 3.03E-05     | -1.03         | <b>2.10</b>   | <b>3.39</b> | <b>Ube2c</b>  | ubiquitin-conjugating enzyme E2C          | 0006260 // DNA replication // inferred from electronic annotation//0009186 // deoxyribonucleoside diphosphate metabolic process // inferred from electronic annotation//000926           |                                                                                                                                                                                                                                                                                                                                                                        |                                  |
| NM_009104    | 1.42E-04          | 8.35E-06     | <b>1.13</b>   | <b>2.50</b>   | <b>3.13</b> | <b>Rrm2</b>   | ribonucleotide reductase M2               | 0006260 // DNA replication // inferred from electronic annotation//0007126 // meiotic nuclear division // inferred from direct assay//0008283 // cell proliferation // not recor         |                                                                                                                                                                                                                                                                                                                                                                        |                                  |
| NM_001081117 | /NM_006507411//   | 9.76E-05     | 6.36E-05      | <b>1.10</b>   | <b>2.60</b> | <b>3.12</b>   | <b>Mki67</b>                              | antigen identified by monoclonal antibody K1 67                                                                                                                                          | 0006461 // protein complex assembly // not recorded//0006468 // protein phosphorylation // inferred from direct assay//0006915 // apoptotic process // inferred from electronic ;                                                                                                                                                                                      |                                  |
| NM_007659    | 3.11E-04          | 3.34E-05     | <b>1.11</b>   | <b>2.15</b>   | <b>3.09</b> | <b>Cdk1</b>   | cyclin-dependent kinase 1                 | 0001649 // osteoblast differentiation // not recorded//0007155 // cell adhesion // inferred from electronic annotation//0007162 // negative regulation of cell adhesion // not recor     |                                                                                                                                                                                                                                                                                                                                                                        |                                  |
| NM_0011607   | /NM_00            | 7.19E-05     | 4.07E-04      | 8.78E-04      | <b>2.55</b> | <b>2.87</b>   | <b>Tnc</b>                                | tenascin C                                                                                                                                                                               | 0000806 // G2/M transition of mitotic cell cycle // not recorded//0000226 // microtubule cytoskeleton organization // inferred from mutant phenotype//0000910 // cytokinesis // r                                                                                                                                                                                      |                                  |
| NM_001012272 | /NM_001012273//   | 5.06E-06     | 5.11E-04      | -1.02         | <b>2.76</b> | <b>3.03</b>   | <b>Birc5</b>                              | baculoviral IAP repeat-containing 5                                                                                                                                                      | 0001933 // negative regulation of protein phosphorylation // inferred from mutant phenotype//0006468 // protein phosphorylation // inferred from electronic annotation//0001631                                                                                                                                                                                        |                                  |
| NM_023209    | /NM_006519257     | 1.35E-04     | 6.78E-06      | <b>1.12</b>   | <b>1.86</b> | <b>2.74</b>   | <b>Pkb</b>                                | PDZ binding repeat                                                                                                                                                                       | 0007173 // epidermal growth factor receptor signaling pathway // not recorded//0007186 // G-protein coupled receptor signaling pathway // not recorded//0008284 // positive reg                                                                                                                                                                                        |                                  |
| NM_009704    | 0.00238687        | 8.16E-05     | 0.00138973    | <b>1.49</b>   | <b>2.42</b> | <b>2.65</b>   | <b>Areg</b>                               | amphiregulin                                                                                                                                                                             | 0000920 // cell morphogenesis // inferred from direct assay//0000910 // cytokinesis // not recorded//0006810 // transport // inferred from electronic annotation//0007049 // cell                                                                                                                                                                                      |                                  |
| NM_001177625 | /NM_001177626//   | 0.00323483   | 0.00476644    | 1.08          | 1.66        | 2.64          | <b>Ec2</b>                                | ect2 oncogene                                                                                                                                                                            | 0000723 // telomere maintenance // inferred from mutant phenotype//0006281 // DNA repair // inferred from mutant phenotype//0006402 // mRNA catabolic process // inferred                                                                                                                                                                                              |                                  |
| NM_010479    | 0.00128837        | 0.00279063   | 3.62          | 2.32          | 2.58        | <b>Hspa1a</b> | heat shock protein 1A                     | 0007049 // cell cycle // inferred from electronic annotation//0045859 // regulation of protein kinase activity // inferred from electronic annotation//0051301 // cell division // infer |                                                                                                                                                                                                                                                                                                                                                                        |                                  |
| NM_016904    | 1.86E-05          | 1.42E-05     | 1.23          | 2.12          | 2.53        | <b>Cks1b</b>  | CDC28 protein kinase 1b                   | 0000281 // mitotic cytokinesis // not recorded//0002244 // hematopoietic progenitor cell differentiation // inferred from genetic interaction//0007049 // cell cycle // inferred from    |                                                                                                                                                                                                                                                                                                                                                                        |                                  |
| NM_028390    | /NM_006510581//NM | 0.001230148  | 7.72E-05      | -1.10         | <b>2.05</b> | <b>2.48</b>   | <b>Anln</b>                               | anillin, actin binding protein                                                                                                                                                           | 0007049 // cell cycle // inferred from electronic annotation//0007067 // mitotic nuclear division // inferred from electronic annotation//0007399 // nervous system development //                                                                                                                                                                                     |                                  |
| NM_022323    | 2.50E-05          | 0.00114813   | 1.01          | 1.65          | 2.48        | <b>Cdc20</b>  | cell division cycle 20                    | 0000709 // regulation of cyclin-dependent protein serine/threonine kinase activity // inferred from electronic annotation//0007049 // cell cycle // inferred from electronic annotation  |                                                                                                                                                                                                                                                                                                                                                                        |                                  |
| NM_009828    | 2.75E-04          | 1.04E-05     | 1.04          | 1.74          | 2.47        | <b>Ccn2</b>   | cyclin 2                                  | 0001701 // in utero embryonic development // inferred from mutant phenotype//0007049 // cell cycle // inferred from electronic annotation//0007067 // mitotic nuclear division //        |                                                                                                                                                                                                                                                                                                                                                                        |                                  |
| NM_007630    | 3.69E-06          | 4.54E-05     | -1.12         | <b>1.77</b>   | <b>2.43</b> | <b>Ccnb2</b>  | cyclin B2                                 | 0007049 // cell cycle // inferred from electronic annotation//0007127 // meiosis 1 // inferred from mutant phenotype//0016310 // phosphorylation // inferred from electronic anno        |                                                                                                                                                                                                                                                                                                                                                                        |                                  |
| NM_025415    | 0.00265037        | 3.27E-04     | -1.02         | <b>1.76</b>   | <b>2.39</b> | <b>Cks2</b>   | CDC28 protein kinase regulatory subunit 2 | 0002250 // adaptive immune response // inferred from electronic annotation//0002376 // immune system process // inferred from electronic annotation                                      |                                                                                                                                                                                                                                                                                                                                                                        |                                  |
| NM_001291892 | /NM_001291893//   | 0.001058841  | 4.70E-06      | 1.34          | 1.84        | 2.39          | <b>Lilrb4//Lilrb4a</b>                    | leukocyte immunoglobulin-like receptor, subfamily B, member 4b                                                                                                                           | 0002376 // immune system process // inferred from electronic annotation//0006810 // transport // inferred from electronic annotation//0006811 // ion transport // inferred from                                                                                                                                                                                        |                                  |
| NM_008491    | 4.21E-04          | 2.89E-06     | 4.51E-04      | <b>1.51</b>   | <b>2.31</b> | <b>Lcn2</b>   | lipocalin 2                               | 0002250 // adaptive immune response // inferred from electronic annotation//0002376 // immune system process // inferred from electronic annotation//0043123 // positive regu            |                                                                                                                                                                                                                                                                                                                                                                        |                                  |
| NM_001190320 | /NM_001190321//   | 4.70E-04     | 8.31E-04      | 1.20          | 1.92        | 2.37          | <b>Clec4n</b>                             | S100 calcium binding family 4, member n                                                                                                                                                  | 0006915 // apoptotic process // inferred from electronic annotation//0032496 // response to lipopolysaccharide // inferred from electronic annotation//0034142 // toll-like recept                                                                                                                                                                                     |                                  |
| NM_001163525 | /NM_001012174     | 2.95E-04     | 1.95E-04      | 1.52          | 2.15        | 2.32          | <b>S100a14</b>                            | C-type lectin domain family 4, member n                                                                                                                                                  | 0002376 // immune system process // inferred from electronic annotation//0006221 // pyrimidine nucleotide biosynthetic process // inferred from electronic annotation//0006241                                                                                                                                                                                         |                                  |
| NM_016748    | /NM_00            | 7.70E-05     | 1.40E-05      | 2.08E-05      | <b>1.81</b> | <b>2.31</b>   | <b>Ctps</b>                               | cystidine 5'-triphosphatase                                                                                                                                                              | 0001666 // response to hypoxia // inferred from electronic annotation//0001932 // regulation of protein phosphorylation // inferred from direct assay//0006469 // negative regulat                                                                                                                                                                                     |                                  |
| NM_007707    | /NM_01            | 2.11E-05     | 5.02E-06      | 7.01E-06      | <b>1.91</b> | <b>2.45</b>   | <b>Socs3</b>                              | suppressor of cytokine signaling 3                                                                                                                                                       | 0000712 // resolution of meiotic recombination intermediates // not recorded//0008019 // sister chromatid segregation // not recorded//0002244 // hematopoietic progenitor cell                                                                                                                                                                                        |                                  |
| NM_011623    | /NM_006533153//NM | 6.59E-04     | 4.81E-04      | 1.10          | 1.93        | 2.31          | <b>Top2a</b>                              | topoisomerase (DNA) II alpha                                                                                                                                                             | 0002185 // monocyte chemotaxis // --//0006935 // chemotaxis // traceable author statement//0006954 // inflammatory response // --//0006955 // immune response // inferre                                                                                                                                                                                               |                                  |
| NM_011332    | /NM_00            | 6.54E-05     | 1.55E-06      | 3.36E-05      | <b>1.78</b> | <b>2.46</b>   | <b>Ccl17</b>                              | chemokine (C-C motif) ligand 17                                                                                                                                                          | 0000185 // activation of MAPKK activity // not recorded//0000186 // activation of MAPKK activity // inferred from direct assay//0006469 // negative regulation of protein kinase a                                                                                                                                                                                     |                                  |
| NM_0011817   | 0.004028          | 0.00107945   | 0.00692808    | <b>1.41</b>   | <b>1.61</b> | <b>2.28</b>   | <b>Gadd45g</b>                            | growth arrest and DNA-damage-inducible 45 gamma                                                                                                                                          | 0000281 // mitotic cytokinesis // not recorded//0009020 // cell separation after cytokinesis // not recorded//0007049 // cell cycle // inferred from electronic annotation//0007067                                                                                                                                                                                    |                                  |
| NM_001164362 | /NM_028293//NM    | 9.22E-04     | 1.54E-04      | 1.03          | 1.69        | 2.23          | <b>Cep55</b>                              | centrosomal protein 55                                                                                                                                                                   | 0001525 // angiogenesis // inferred from electronic annotation//0006915 // apoptotic process // inferred from electronic annotation//0006931 // substrate-dependent cell migrat                                                                                                                                                                                        |                                  |
| NM_001161746 | /NM_866E-05       | 3.96E-04     | 1.50E-04      | 1.50          | 2.12        | 2.21          | <b>Tnfrsf12a</b>                          | tumor necrosis factor receptor superfamily, member 12a                                                                                                                                   | 0001525 // ossification // inferred from electronic annotation//0001649 // osteoblast differentiation // not recorded//0006954 // inflammatory response // inferred from electronic                                                                                                                                                                                    |                                  |
| NM_001204203 | /NM_001204202//   | 5.33E-06     | 8.69E-04      | 1.05          | 2.26        | 2.19          | <b>Spp1</b>                               | secreted phosphoprotein 1                                                                                                                                                                | 0006810 // transport // inferred from electronic annotation//0006821 // chloride transport // not recorded//0006885 // regulation of pH // inferred from mutant phenotype//0000                                                                                                                                                                                        |                                  |
| NM_011867    | /NM_006515091//NM | 4.86E-05     | 3.99E-05      | 1.52          | 1.78        | 2.17          | <b>Slc26a8</b>                            | solute carrier family 26, member 4                                                                                                                                                       | 0003209 // tumor necrosis factor-mediated signaling pathway // inferred from genetic interaction//0043000 // Golgi to plasma membrane CFTR protein transport // not recorded//h                                                                                                                                                                                        |                                  |
| NM_010664    | 5.61E-04          | 2.40E-05     | 9.83E-07      | 1.26          | 1.73        | 2.15          | <b>Krt18</b>                              | keratin 18                                                                                                                                                                               | 0001525 // angiogenesis // inferred from electronic annotation//0002062 // chondrocyte differentiation // inferred from electronic annotation//0007155 // cell adhesion // inferre                                                                                                                                                                                     |                                  |
| NM_009369    | 0.00269734        | 3.06E-04     | 7.07E-06      | 1.25          | 1.75        | 2.14          | <b>Tgfb1</b>                              | transforming growth factor, beta induced                                                                                                                                                 | 0006260 // DNA replication // inferred from electronic annotation//0006270 // DNA replication initiation // inferred from electronic annotation//0007049 // cell cycle // inferred fr                                                                                                                                                                                  |                                  |
| NM_001302540 | /NM_00406378      | 5.53E-06     | 5.64E-04      | 1.21          | 1.83        | 2.13          | <b>Mcm5</b>                               | minichromosome maintenance deficient 5, cell division cycle 46 S                                                                                                                         | 0001938 // positive regulation of endothelial cell proliferation // not recorded//0002541 // activation of plasma trypsin involved in acute inflammatory response // not recorded//h                                                                                                                                                                                   |                                  |
| NM_010171    | 0.00202076        | 6.24E-04     | 0.00170283    | 1.86          | 2.41        | 2.12          | <b>F3</b>                                 | coagulation factor III                                                                                                                                                                   | 0000724 // double-strand break repair via homologous recombination // inferred from direct assay//000724 // double-strand break repair via homologous recombination // inferre                                                                                                                                                                                         |                                  |
| NM_011224    | 3.50E-04          | 5.53E-05     | 1.05          | 1.61          | 2.11        | <b>Rad51</b>  | RAD51 homolog                             | 0005975 // carbohydrate metabolic process // inferred from electronic annotation//0006032 // chain catabolic process // not recorded//0006954 // inflammatory response // inferre        |                                                                                                                                                                                                                                                                                                                                                                        |                                  |
| NM_1451426   | /NM_009892        | 0.006972907  | 0.0053045     | -1.17         | 2.05        | 2.07          | <b>Chil4//Chil3</b>                       | chitinase-like 4//chitinase-like 3                                                                                                                                                       | 0006915 // apoptotic process // inferred from electronic annotation//0012189 // forebrain neuron differentiation // inferred from electronic annotation//0043065 // positive regulat                                                                                                                                                                                   |                                  |
| NM_009344    | /NR_871           | 4.17E-04     | 0.00103555    | 1.63          | 2.42        | 2.06          | <b>Plhid1</b>                             | pleckstrin homology-like domain, family A, member 1                                                                                                                                      | 0001878 // transport to yeast // inferred from direct assay//0001879 // detection of yeast // inferred from direct assay//0002211 // pattern recognition receptor signaling pathway                                                                                                                                                                                    |                                  |
| NM_001309637 | /NM_020008//NR    | 0.007119291  | 0.00377891    | 1.16          | 2.05        | 2.06          | <b>Clec7a</b>                             | C-type lectin domain family 7, member a                                                                                                                                                  | 0009887 // organ morphogenesis // inferred from mutant phenotype//0018149 // peptide cross-linking // inferred from electronic annotation//0019538 // protein metabolic proces                                                                                                                                                                                         |                                  |
| NM_001161714 | /NM_00125905      | 3.45E-05     | 1.39E-04      | 1.47          | 2.12        | 2.05          | <b>Tgm1</b>                               | transglutaminase 1, K, polypeptide                                                                                                                                                       | 0001525 // angiogenesis // non-traceable author statement//0001832 // blastocyst growth // traceable author statement//0007173 // epidermal growth factor receptor signaling p                                                                                                                                                                                         |                                  |
| NM_010415    | 6.54E-05          | 0.00113656   | 2.19E-06      | 1.34          | 1.51        | 2.03          | <b>Hbegf</b>                              | heparin-binding EGF-like growth factor                                                                                                                                                   | 0016488 // farnesyl catabolic process // not recorded//0044597 // daurorubicin metabolic process // not recorded//0044598 // doxorubicin metabolic process // not recorded//h                                                                                                                                                                                          |                                  |
| NM_008012    | 4.52E-05          | 5.10E-05     | 1.34E-05      | 1.61          | 2.03        | 2.01          | <b>Akr1b8</b>                             | aldo-keto reductase family 1, member B8                                                                                                                                                  | 0002024 // spliceosome tri-snRNP complex assembly // not recorded//000398 // mRNA splicing, via spliceosome // not recorded//0006397 // mRNA processing // inferred from e                                                                                                                                                                                             |                                  |
| NM_001110101 | /NM_001204273//   | 3.19E-04     | 1.19E-06      | 2.00          | 1.59        | 1.69          | <b>Lsm2</b>                               | LSM2 homolog, U6 small nuclear RNA associated (S. cerevisiae)                                                                                                                            | 0008543 // fibroblast growth factor receptor signaling pathway // inferred from mutant phenotype//2000177 // regulation of neural precursor cell proliferation // inferred from mut                                                                                                                                                                                    |                                  |
| NM_011369    | 6.27E-05          | 2.89E-06     | 1.03          | 1.63          | 1.99        | <b>Schbp1</b> | SH2 domain binding protein 1              | 0000904 // cell morphogenesis involved in differentiation // traceable author statement//0007275 // multicellular organismal development // traceable author statement//0033205          |                                                                                                                                                                                                                                                                                                                                                                        |                                  |
| NM_031170    | 0.00207908        | 5.74E-04     | 1.35E-04      | 1.26          | 1.92        | 1.98          | <b>Krt18</b>                              | keratin 8                                                                                                                                                                                | 0006882 // cellular zinc ion homeostasis // inferred from mutant phenotype//0007263 // nitric oxide mediated signal transduction // inferred from mutant phenotype//0010273 // r                                                                                                                                                                                       |                                  |
| NM_008630    | 2.85E-06          | 6.98E-05     | 1.13E-04      | 3.25          | 2.84        | 1.97          | <b>M2</b>                                 | metallothionein 2                                                                                                                                                                        | 0010466 // negative regulation of peptidase activity // inferred from electronic annotation//0032496 // response to lipopolysaccharide // inferred from direct assay//0034612 // r                                                                                                                                                                                     |                                  |
| NM_183249    | 0.003977341       | 7.17E-05     | -1.00         | 1.74          | 1.96        | <b>Wfdc21</b> | WAP four-disulfide core domain 21         | 0000281 // mitotic cytokinesis // not recorded//0009010 // cytokinesis // not recorded//0000920 // cell separation after cytokinesis // not recorded//0001578 // microtubule bun         |                                                                                                                                                                                                                                                                                                                                                                        |                                  |
| NM_001166406 | /NM_184E-04       | 1.84E-04     | 1.59E-05      | -1.04         | 1.25        | 1.95          | <b>Kif20a</b>                             | kinesin family member 20A                                                                                                                                                                | 0007339 // binding of sperm to zona pellucida // inferred from direct assay//0009408 // response to heat // inferred from direct assay//0043066 // negative regulation of apoptotic                                                                                                                                                                                    |                                  |
| NM_010478    | 0.00991306        | 0.00991306   | 2.15          | 1.48          | 1.95        | <b>Hspa1b</b> | heat shock protein 1B                     | 0000070 // mitotic sister chromatid segregation // not recorded//0000086 // G2/M transition of mitotic cell cycle // not recorded//0001022 // negative regulation of transcription f     |                                                                                                                                                                                                                                                                                                                                                                        |                                  |
| NM_011121    | 4.59E-05          | 3.09E-05     | 1.05          | 1.55          | 1.95        | <b>Plk1</b>   | polo-like kinase 1                        | 0003281 // ventricular septum development // inferred from mutant phenotype//0006766 // vitamin metabolic process // inferred from mutant phenotype//0006897 // endocytos                |                                                                                                                                                                                                                                                                                                                                                                        |                                  |
| NM_001081088 | 5.66E-04          | 1.81E-04     | 2.28E-04      | 1.36          | 1.72        | 1.92          | <b>Lrp2</b>                               | low density lipoprotein receptor-related protein 2                                                                                                                                       | 0000079 // regulation of cyclin-dependent protein serine/threonine kinase activity // inferred from direct assay//0001836 // release of cytochrome c from mitochondria // not recor                                                                                                                                                                                    |                                  |
| NM_018754    | 0.00146954        | 0.003028516  | 0.00477337    | 1.55          | 1.93        | 1.90          | <b>Sfn</b>                                | stratifin                                                                                                                                                                                | 0000272 // mitotic cell cycle // inferred from electronic annotation//0001556 // oocyte maturation // not recorded//0001701 // in utero embryonic development // inferred from n                                                                                                                                                                                       |                                  |
| NM_172301    | /NM_011244665//XR | 0.001493795  | 1.32E-04      | 1.01          | 1.38        | 1.89          | <b>Ccnb1//Gm5593</b>                      | cyclin B1//predicted gene 5593                                                                                                                                                           | 0000272 // polysaccharide catabolic process // inferred from electronic annotation//0005975 // carbohydrate metabolic process // inferred from electronic annotation//0006032 //                                                                                                                                                                                       |                                  |
| NM_009892    | /NM_145126        | 0.00298196   | 0.00377891    | 1.10          | 1.93        | 1.89          | <b>Chil3//Chil4</b>                       | chitinase-like 3//chitinase-like 4                                                                                                                                                       | 0042552 // myelination // not recorded//1902043 // positive regulation of extrinsic apoptotic signaling pathway via death domain receptors // inferred from direct assay                                                                                                                                                                                               |                                  |
| NM_001171187 | /NM_00543237      | 6.84E-05     | 4.24E-05      | -1.19         | 1.57        | 1.88          | <b>Moi</b>                                | myelin and lymphocyte protein, T, cell differentiation protein                                                                                                                           | 0019058 // viral life cycle // inferred from electronic annotation                                                                                                                                                                                                                                                                                                     |                                  |
| NM_033075    | /NR_871           | 2.03E-04     | 0.003982373   | 1.34          | 1.65        | 1.88          | <b>D17H6565E-5</b>                        | DM segment, chr 17, human D6565 5                                                                                                                                                        | 0006564 // L-serine biosynthetic process // inferred from electronic annotation//0008152 // metabolic process // inferred from electronic annotation//0008652 // cellular amino ac                                                                                                                                                                                     |                                  |
| NM_001205339 | /NM_177420        | 0.002927174  | 0.00185353    | 1.22          | 1.71        | 1.87          | <b>Psat1</b>                              | phosphoserine aminotransferase 1                                                                                                                                                         | 0007130 // cellular response to organic substance // inferred from direct assay                                                                                                                                                                                                                                                                                        |                                  |
| NM_001291058 | /NM_009853//NR    | 4.64E-06     | 0.00428983    | 1.04          | 1.99        | 1.87          | <b>Cd68</b>                               | CD68 antigen                                                                                                                                                                             | 0000132 // establishment of mitotic spindle orientation // not recorded//0051382 // kinetochore assembly // not recorded//0071459 // protein localization to chromosome, centro                                                                                                                                                                                        |                                  |
| NM_001302129 | /NM_001302130//   | 0.005232663  | 0.0016117     | -1.05         | 1.29        | 1.85          | <b>Cenpa</b>                              | centromere protein A                                                                                                                                                                     | 0000122 // negative regulation of transcription from RNA polymerase II promoter // not recorded//0002903 // negative regulation of B cell apoptotic process // not recorded//0000                                                                                                                                                                                      |                                  |
| NM_011496    | /NM_006532725     | 3.10E-04     | 2.95E-05      | 1.02          | 1.41        | 1.85          | <b>Aurkb</b>                              | aurora kinase B                                                                                                                                                                          | 0006260 // DNA replication // inferred from electronic annotation//0006468 // protein phosphorylation // --//0007049 // cell cycle // inferred from electronic annotation//00070                                                                                                                                                                                       |                                  |
| NM_001190717 | /NM_013726//NM    | 0.01240670   | 4.57E-04      | 1.04          | 1.30        | 1.85          | <b>Dbf4</b>                               | B cell leukemia/lymphoma 3                                                                                                                                                               | 0000060 // protein import into nucleus, translocation // not recorded//002268 // follicular dendritic cell differentiation // inferred from mutant phenotype//0002315 // marginal a                                                                                                                                                                                    |                                  |
| NM_03360     | /NM_00            | 3.02E-04     | 0.005906933   | 1.49          | 1.67        | 1.85          | <b>Bcl3</b>                               | Bcl3                                                                                                                                                                                     | 0000162 // negative regulation of transcription from RNA polymerase II promoter // inferred from direct assay//0000122 // negative regulation of transcription from RNA polymerase                                                                                                                                                                                     |                                  |
| NM_00111078  | /NM_001111079//   | 1.66E-05     | 0.00208285    | 1.17          | 1.78        | 1.84          | <b>Uhrf1</b>                              | URIEN CDNA 4933413G1 gene//Rinkad box M1                                                                                                                                                 | 0000260 // DNA replication // inferred from electronic annotation//0006268 // DNA unwinding involved in DNA replication // inferred from physical interaction//0006270 // DNA re                                                                                                                                                                                       |                                  |
| NM_008021    | /NM_027697        | 7.54E-05     | 1.74E-05      | 1.15          | 1.52        | 1.84          | <b>4933413G1R1K//Foxm1</b>                | RIKEN CDNA 4933413G1 gene//Rinkad box M1                                                                                                                                                 | 0006260 // DNA replication // inferred from electronic annotation//0006268 // DNA unwinding involved in DNA replication //                                                                                                                                                                                                                                             |                                  |

| RefSeq       | Transcript ID  | p (24h n=460)  | p (48h n=657) | p (72h n=805)   | FC 24h      | FC 48h        | FC 72h                                              | Gene Symbol                                                                                                                                                                        | Gene Title                                                                                                                                                                                 | Gene Ontology Biological Process |
|--------------|----------------|----------------|---------------|-----------------|-------------|---------------|-----------------------------------------------------|------------------------------------------------------------------------------------------------------------------------------------------------------------------------------------|--------------------------------------------------------------------------------------------------------------------------------------------------------------------------------------------|----------------------------------|
| NM_001313963 | /NM_758E-04    | 0.001150255    | 2.22E-04      | <b>1.15</b>     | <b>1.98</b> | <b>1.75</b>   | <b>Krt19</b>                                        | keratin 19                                                                                                                                                                         | 0007219 // Notch signaling pathway // inferred from direct assay//0043627 // response to estrogen // inferred from electronic annotation//0045214 // sarcomere organization // n           |                                  |
| NM_013602    | /XM_00         | 1.12E-05       | 2.53E-04      | <b>2.15</b>     | <b>2.08</b> | <b>1.75</b>   | <b>M1</b>                                           | metallothionein 1                                                                                                                                                                  | 0000032 // cell wall mannoprotein biosynthetic process // --//0006486 // protein glycosylation // inferred from electronic annotation//0006493 // protein D-linked glycosylation //        |                                  |
| NM_007802    | /XM_000500974  | 0.001038144    | 1.41E-04      | <b>1.08</b>     | <b>1.60</b> | <b>1.74</b>   | <b>Ctsk</b>                                         | cathepsin K                                                                                                                                                                        | 0001957 // intramembranous ossification // inferred from electronic annotation//0006508 // proteolysis // inferred from electronic annotation//00030574 // collagen catabolic proc         |                                  |
| NM_001113179 | /NM_009772     | /XM_000492327  | 7.74E-04      | <b>-1.03</b>    | <b>1.49</b> | <b>1.74</b>   | <b>Bub1</b>                                         | ubiquitin inhibited by benzimidazole 1 homolog (S. cerevisiae)                                                                                                                     | 0006468 // protein phosphorylation // inferred from electronic annotation//0006915 // apoptotic process // inferred from electronic annotation//0007049 // cell cycle // inferred fr       |                                  |
| NM_009890    | 8.96E-05       | 2.74E-05       | 3.54E-04      | <b>1.68</b>     | <b>2.17</b> | <b>1.74</b>   | <b>Ch25h</b>                                        | cholesterol 25-hydroxylase                                                                                                                                                         | 0006629 // lipid metabolic process // inferred from electronic annotation//0006633 // fatty acid biosynthetic process // inferred from electronic annotation//0006694 // steroid bio       |                                  |
| NM_000889    | 0.00310169     | 0.004915863    | 0.0030352     | <b>1.18</b>     | <b>1.42</b> | <b>1.73</b>   | <b>Ppp1r14b</b>                                     | protein phosphatase 1, regulatory (inhibitor) subunit 14B                                                                                                                          | 0042325 // regulation of phosphorylation // inferred from electronic annotation//0043086 // negative regulation of catalytic activity // not recorded//0050790 // regulation of cata       |                                  |
| NM_009364    | /XM_000505043  | /NM_006131017  | 5.76E-05      | <b>1.30</b>     | <b>1.50</b> | <b>1.72</b>   | <b>Tfp2j</b>                                        | tissue factor pathway inhibitor 2                                                                                                                                                  | 0007596 // blood coagulation // inferred from electronic annotation//0007599 // hemostasis // inferred from electronic annotation//0010466 // negative regulation of peptidase ac          |                                  |
| NM_001033166 | /NM_001037279  |                | 0.00404433    | <b>1.02</b>     | <b>1.41</b> | <b>1.72</b>   | <b>2700094K13Rik</b>                                | RIKEN cDNA 2700094K13 gene                                                                                                                                                         | 0045454 // cell redox homeostasis // inferred from electronic annotation                                                                                                                   |                                  |
| NM_001291185 | /NM_011497     | 7.60E-04       | 1.40E-04      | <b>1.04</b>     | <b>1.34</b> | <b>1.72</b>   | <b>Aurka</b>                                        | aurora kinase A                                                                                                                                                                    | 0000212 // meiotic spindle organization // inferred from mutant phenotype//0000226 // microtubule cytoskeleton organization // inferred from genetic interaction//0000278 // mi            |                                  |
| NM_001159299 | /NM_713E-05    |                | 0.00267216    | <b>1.39</b>     | <b>1.66</b> | <b>1.72</b>   | <b>Ith4</b>                                         | inter alpha-trypsin inhibitor, heavy chain 4                                                                                                                                       | 0006953 // acute-phase response // inferred from electronic annotation//0010466 // negative regulation of peptidase activity // inferred from electronic annotation//0010951 // ni         |                                  |
| NM_020010    | 7.94E-05       | 2.01E-06       | 4.44E-04      | <b>1.70</b>     | <b>2.03</b> | <b>1.72</b>   | <b>Cyp51</b>                                        | cytochrome P450, family 51                                                                                                                                                         | 0006629 // lipid metabolic process // inferred from electronic annotation//0006694 // steroid biosynthetic process // not recorded//0006695 // cholesterol biosynthetic process // t       |                                  |
| NM_145360    | /XM_00         | 4.63E-04       | 4.04E-04      | <b>1.59</b>     | <b>1.84</b> | <b>1.71</b>   | <b>Gm38481</b>                                      | predicted gene, 38481//isopentenyl-diphosphate delta isomerase                                                                                                                     | 0006629 // lipid metabolic process // inferred from electronic annotation//0006694 // steroid biosynthetic process // inferred from electronic annotation//0006695 // cholesterol b        |                                  |
| NM_013492    | /XM_000518503  | /XM_328E-04    | 1.59E-04      | <b>1.05</b>     | <b>1.38</b> | <b>1.71</b>   | <b>Cfu</b>                                          | clusterin                                                                                                                                                                          | 0009092 // cell morphogenesis // not recorded//0001774 // microglial cell activation // not recorded//0008219 // cell death // inferred from electronic annotation//0008284 // po          |                                  |
| NM_008605    | /XM_011242357  | /XM_01242358   | 0.00785685    | <b>1.11</b>     | <b>1.47</b> | <b>1.70</b>   | <b>Mmp12</b>                                        | matrix metalloproteinase 12                                                                                                                                                        | 0005508 // proteolysis // inferred from electronic annotation//0014070 // response to organic cyclic compound // inferred from electronic annotation//0035313 // wound healing,            |                                  |
| NM_010766    | 3.78E-05       | 7.05E-05       | 1.23E-05      | <b>1.30</b>     | <b>2.25</b> | <b>1.70</b>   | <b>Mmpc</b>                                         | macrophage receptor with collagenous structure                                                                                                                                     | 0002376 // immune system process // inferred from electronic annotation//0006897 // endocytosis // inferred from mutant phenotype//0006898 // receptor-mediated endocytosi                 |                                  |
| NM_022430    | 0.007245855    | 0.202E-05      | 1.02E-05      | <b>1.50</b>     | <b>1.70</b> | <b>Ms40a8</b> | membrane-spanning 4-domains, subfamily A, member 8A |                                                                                                                                                                                    |                                                                                                                                                                                            |                                  |
| NM_011239    | 0.00127528     | 0.00199509     | 1.11E-04      | <b>1.40</b>     | <b>1.70</b> | <b>Ranbp1</b> | RAN binding protein 1                               | 0007051 // spindle organization // inferred from direct assay//0010976 // positive regulation of neuron projection development // not recorded//0035690 // cellular response to dr |                                                                                                                                                                                            |                                  |
| NM_145480    | 3.58E-04       | 0.00111975     | 1.07E-05      | <b>1.45</b>     | <b>1.68</b> | <b>Rfc4</b>   | replication factor C (activator) 1 4                | 0006260 // DNA replication // inferred from electronic annotation//0006261 // DNA-dependent DNA replication // not recorded//0006281 // DNA repair // not recorded                 |                                                                                                                                                                                            |                                  |
| NM_011495    | /NM_173169     | /NR_00         | 0.003996193   | <b>3.33E-04</b> | <b>1.08</b> | <b>1.40</b>   | <b>Pik4</b>                                         | polo-like kinase 4                                                                                                                                                                 | 0006468 // protein phosphorylation // inferred from electronic annotation//0007099 // centriole replication // inferred from mutant phenotype//0007099 // centriole replication //         |                                  |
| NM_001313914 | /NM_643E-05    | 5.63E-04       | 1.41E-04      | <b>2.55</b>     | <b>2.41</b> | <b>1.67</b>   | <b>Thbs1</b>                                        | thrombospondin 1                                                                                                                                                                   | 0001887 // activation of MAPK activity // not recorded//0001937 // negative regulation of endothelial cell proliferation // inferred from mutant phenotype//0001937 // negative reg        |                                  |
| NM_011905    | /XM_000510460  | 2.95E-04       | 1.71E-05      | <b>1.06</b>     | <b>1.50</b> | <b>1.67</b>   | <b>Tir2</b>                                         | tol-like receptor 2                                                                                                                                                                | 0001774 // microglial cell activation // not recorded//0002224 // toll-like receptor signaling pathway // not recorded//0002237 // response to molecule of bacterial origin // infl        |                                  |
| NM_011568    | /NM_019484     | /XR_38         | 0.001122384   | <b>1.05</b>     | <b>1.35</b> | <b>1.67</b>   | <b>Allyref1</b>                                     | Ally/REF export factor 2                                                                                                                                                           | 0006397 // mRNA processing // inferred from electronic annotation//0006406 // mRNA export from nucleus // inferred from electronic annotation//0006810 // transport // inferre             |                                  |
| NM_019499    | /XM_000506406  | 0.005283785    | 0.00202498    | <b>1.02</b>     | <b>1.48</b> | <b>1.67</b>   | <b>Mad21</b>                                        | MAD2 mitotic arrest deficient-like 1                                                                                                                                               | 0000079 // mitotic sister chromatid segregation // inferred from mutant phenotype//0007049 // cell cycle // inferred from electronic annotation//0007067 // mitotic nuclear divisio        |                                  |
| NM_026014    | 0.002053018    | 1.07E-04       | 1.40E-06      | <b>1.40</b>     | <b>1.66</b> | <b>Ct1</b>    | chromatin licensing and DNA replication factor 1    | 0000076 // DNA replication checkpoint // inferred from direct assay//0000076 // DNA replication checkpoint // not recorded//0006260 // DNA replication // inferred from electri    |                                                                                                                                                                                            |                                  |
| NM_026835    | 0.0010361      | 1.32E-05       | 1.53E-05      | <b>1.65</b>     | <b>1.65</b> | <b>Ms40d1</b> | membrane-spanning 4-domains, subfamily A, member 6D |                                                                                                                                                                                    |                                                                                                                                                                                            |                                  |
| NM_010295    | /XM_00         | 3.81E-04       | 1.02E-04      | <b>1.54</b>     | <b>1.24</b> | <b>1.65</b>   | <b>Glc</b>                                          | glutamate-cysteine ligase, catalytic subunit                                                                                                                                       | 0006534 // cysteine metabolic process // not recorded//0006536 // glutamate metabolic process // not recorded//0006749 // glutathione metabolic process // inferred from muta              |                                  |
| NM_133762    | /XM_000516349  | /XM_000516350  | 0.00205482    | <b>1.02</b>     | <b>1.50</b> | <b>1.64</b>   | <b>Ncapg2</b>                                       | NM2 mitocendin I complex, subunit G2                                                                                                                                               | 0001833 // inner cell mass cell proliferation // inferred from mutant phenotype//0007049 // cell cycle // inferred from electronic annotation//0007067 // mitotic nuclear division //      |                                  |
| NM_011227    | /XM_01         | 3.56E-04       | 1.85E-04      | <b>1.43</b>     | <b>1.56</b> | <b>1.63</b>   | <b>Rob20</b>                                        | RAB20, member RAS oncogene family                                                                                                                                                  | 0006810 // transport // inferred from electronic annotation//0006886 // intracellular protein transport // not recorded//0007264 // small GTPase mediated signal transduction // i         |                                  |
| NM_010172    | 2.03E-04       | 1.05E-04       | 1.06E-04      | <b>1.06</b>     | <b>1.46</b> | <b>1.63</b>   | <b>F7</b>                                           | coagulation factor VII                                                                                                                                                             | 0002690 // positive regulation of leukocyte chemotaxis // not recorded//0006508 // proteolysis // inferred from electronic annotation//0007596 // blood coagulation // inferred fr         |                                  |
| NM_001033484 | /XM_0005101643 | 1.77E-04       | 3.76E-05      | <b>1.07</b>     | <b>1.40</b> | <b>1.62</b>   | <b>Iqgap3</b>                                       | IQ motif containing GTPase activating protein 3                                                                                                                                    | 0000082 // G1/S transition of mitotic cell cycle // inferred from mutant phenotype//0001187 // activation of MAPK activity // inferred from mutant phenotype//0001934 // positive          |                                  |
| NM_020047    | 2.41E-04       | 5.60E-05       | 0.0038563     | <b>1.31</b>     | <b>1.62</b> | <b>1.62</b>   | <b>Tacst2</b>                                       | tumor-associated calcium signal transducer 2                                                                                                                                       | 0010633 // negative regulation of epithelial cell migration // inferred from direct assay//0050678 // regulation of epithelial cell proliferation // inferred from expression pattern//00: |                                  |
| NM_001297747 | /NM_000298634  | 7.39E-04       | 0.0061065     | <b>1.22</b>     | <b>1.50</b> | <b>1.61</b>   | <b>Btg3</b>                                         | B cell translocation gene 3//B cell translocation gene 3 pseudogen                                                                                                                 | 0045930 // negative regulation of mitotic cell cycle // not recorded                                                                                                                       |                                  |
| NM_001316995 | /NM_016750     | 1.08E-04       | 1.93E-04      | <b>1.09</b>     | <b>1.59</b> | <b>1.61</b>   | <b>Gm203</b>                                        | predicted pseudogene 8203//H2a histone family, member Z                                                                                                                            | 0006325 // chromatin organization // not recorded//0006342 // chromatin silencing // not recorded//0007275 // multicellular organismal development // inferred from electri                |                                  |
| NM_010790    | /XM_000537640  | 3.86E-04       | -1.05E-05     | <b>1.23</b>     | <b>1.61</b> | <b>1.61</b>   | <b>Meik</b>                                         | myristic leucine zipper kinase                                                                                                                                                     | 0006468 // protein phosphorylation // inferred from electronic annotation//0006915 // apoptotic process // not recorded//0007049 // cell cycle // inferred from electronic annotati        |                                  |
| NM_023284    | /XM_000496958  | 0.00325016     | 1.02E-05      | <b>1.35</b>     | <b>1.61</b> | <b>1.61</b>   | <b>Nuf2</b>                                         | NUP2, NDC80 kinetochore complex component, homolog (S. cere                                                                                                                        | 0007049 // cell cycle // inferred from electronic annotation//0007067 // mitotic nuclear division // inferred from electronic annotation//0008608 // attachment of spindle microtub        |                                  |
| NM_026438    | 0.0013035      | 6.85E-04       | 0.0023697     | <b>1.25</b>     | <b>1.43</b> | <b>1.61</b>   | <b>Ppa1</b>                                         | pyrophosphatase (inorganic)                                                                                                                                                        | 0006796 // phosphate-containing compound metabolic process // inferred by curator                                                                                                          |                                  |
| NM_001077529 | /NM_008705     | 0.001581035    | 4.51E-04      | <b>1.06</b>     | <b>1.38</b> | <b>1.60</b>   | <b>Nme2</b>                                         | NME2/23 nucleoside diphosphate kinase 2                                                                                                                                            | 0002762 // negative regulation of myeloid leukocyte differentiation // not recorded//0006163 // purine nucleotide metabolic process // not recorded//0006165 // nucleoside diph            |                                  |
| NM_010798    | 0.009453878    | 1.00E-05       | 0.0029498     | <b>1.08</b>     | <b>1.40</b> | <b>1.59</b>   | <b>Mf1</b>                                          | macrophage migration inhibitory factor                                                                                                                                             | 0001516 // prostaglandin biosynthetic process // not recorded//0001934 // positive regulation of protein phosphorylation // inferred from direct assay//0002035 // brain renin-ang         |                                  |
| NM_026410    | 4.05E-04       | 6.53E-05       | 1.03E-05      | <b>1.43</b>     | <b>1.59</b> | <b>1.59</b>   | <b>Ccals5</b>                                       | cell division cycle associated 5                                                                                                                                                   | 0000082 // G1/S transition of mitotic cell cycle // not recorded//0006302 // double-strand break repair // not recorded//0007049 // cell cycle // inferred from electronic annotati        |                                  |
| NM_001145953 | /NM_200E-04    | 9.01E-05       | 7.30E-05      | <b>1.30</b>     | <b>1.73</b> | <b>1.59</b>   | <b>Lgals3</b>                                       | lectin, galactose binding, soluble 3                                                                                                                                               | 0001501 // skeletal system development // inferred from genetic interaction//0002376 // immune system process // inferred from electronic annotation//0002548 // monocyte ch               |                                  |
| NM_025443    | 0.006398648    | 0.00593472     | 1.30E-05      | <b>1.42</b>     | <b>1.59</b> | <b>1.59</b>   | <b>Pno1</b>                                         | partner of NOB1 homolog (S. cerevisiae)                                                                                                                                            |                                                                                                                                                                                            |                                  |
| NM_001199123 | /NM_001199124  | 7.23E-05       | 4.72E-05      | <b>1.12</b>     | <b>1.42</b> | <b>1.59</b>   | <b>Spc25</b>                                        | SPC25, NDC80 kinetochore complex component, homolog (S. cere                                                                                                                       | 0007049 // cell cycle // inferred from electronic annotation//0007052 // mitotic spindle organization // not recorded//0007059 // chromosome segregation // not recorded//0007             |                                  |
| NM_008102    | 0.00106521     | 0.00156661     | 1.39E-05      | <b>1.39</b>     | <b>1.45</b> | <b>1.58</b>   | <b>Gch1</b>                                         | GTP cyclohydrolase 1                                                                                                                                                               | 0006461 // protein complex assembly // not recorded//0006729 // tetrahydrobiopterin biosynthetic process // not recorded//0006729 // tetrahydrobiopterin biosynthetic proc                 |                                  |
| NM_016723    | /NM_033607     | /XM_00         | 0.007923941   | <b>1.21</b>     | <b>1.41</b> | <b>1.58</b>   | <b>Uchl3</b>                                        | ubiquitin carboxyl-terminal esterase L3 (ubiquitin thioesterase)//                                                                                                                 | 0006508 // proteolysis // inferred from electronic annotation//0006915 // ubiquitin-dependent protein catabolic process // inferred from electronic annotation//0007628 // adult v         |                                  |
| NM_011072    | 0.007228755    | 0.007228755    | 1.02E-05      | <b>1.30</b>     | <b>1.58</b> | <b>1.58</b>   | <b>Pfn1</b>                                         | profilin 1                                                                                                                                                                         | 0001843 // neural tube closure // inferred from genetic interaction//0006357 // regulation of transcription from RNA polymerase II promoter // inferred from genetic interaction//0        |                                  |
| NM_011311    | /XM_0005101177 | /XM_0005101178 | 0.00139097    | <b>1.17</b>     | <b>1.31</b> | <b>1.58</b>   | <b>S100a4</b>                                       | S100 calcium binding protein A4                                                                                                                                                    | 0004123 // positive regulation of I-kappaB kinase/NF-kappaB signaling // not recorded                                                                                                      |                                  |
| NM_001308227 | /NM_383E-04    | 3.58E-04       | 0.0058075     | <b>1.78</b>     | <b>1.64</b> | <b>1.58</b>   | <b>Dnajb1</b>                                       | DnaJ (Hsp40) homolog, subfamily B, member 1                                                                                                                                        | 0006457 // protein folding // inferred from electronic annotation//00032781 // positive regulation of ATPase activity // not recorded//0051085 // chaperone mediated protein foldi         |                                  |
| NM_146171    | /XM_000506531  | /XM_220E-04    | 0.00136684    | <b>-1.04</b>    | <b>1.47</b> | <b>1.57</b>   | <b>Ncapg2</b>                                       | non-SMC condensin I complex, subunit D2                                                                                                                                            | 0007049 // cell cycle // inferred from electronic annotation//0007067 // mitotic nuclear division // inferred from electronic annotation//0007076 // mitotic chromosome condensat          |                                  |
| NM_009841    | 4.27E-06       | 1.80E-05       | 9.48E-04      | <b>1.61</b>     | <b>1.86</b> | <b>1.57</b>   | <b>Cd14</b>                                         | CD14 antigen                                                                                                                                                                       | 0002237 // response to molecule of bacterial origin // inferred from direct assay//0002376 // immune system process // inferred from electronic annotation//0006898 // receptor-i          |                                  |
| NM_028128    | 0.00132008     | 6.28E-05       | 1.10E-05      | <b>1.27</b>     | <b>1.57</b> | <b>Rfc5</b>   | replication factor C (activator) 1 5                | 0006260 // DNA replication // inferred from electronic annotation//0006261 // DNA-dependent DNA replication // not recorded//0006281 // DNA repair // not recorded                 |                                                                                                                                                                                            |                                  |
| NM_011045    | 0.00137512     | 2.49E-04       | 1.22E-05      | <b>1.22</b>     | <b>1.57</b> | <b>1.57</b>   | <b>Pcna</b>                                         | proliferating cell nuclear antigen                                                                                                                                                 | 0001022 // negative regulation of transcription from RNA polymerase II promoter // inferred from direct assay//0006260 // DNA replication // inferred from electronic annotation//         |                                  |
| NM_133897    | /XM_00         | 0.00176612     | 9.05E-05      | <b>1.25E-04</b> | <b>1.31</b> | <b>1.74</b>   | <b>Lrr8c</b>                                        | leucine rich repeat containing 8 family, member C                                                                                                                                  | 0006810 // transport // inferred from electronic annotation//0006811 // ion transport // inferred from electronic annotation//0045444 // fat cell differentiation // inferred from dir     |                                  |
| NM_026816    | 0.003901336    | 0.00330454     | 1.27E-05      | <b>1.41</b>     | <b>1.56</b> | <b>1.56</b>   | <b>Glf2f2</b>                                       | general transcription factor IIF, polypeptide 2                                                                                                                                    | 0006351 // transcription, DNA-templated // inferred from electronic annotation//0006355 // regulation of transcription, DNA-templated // inferred from electronic annotation//00           |                                  |
| NM_197982    | /XM_00         | 0.00690338     | 4.72E-05      | <b>1.21</b>     | <b>1.54</b> | <b>1.56</b>   | <b>Ddx39</b>                                        | DEAD (Asp-Glu-Ala-Asp) box polypeptide 39                                                                                                                                          | 0000398 // mRNA splicing, via spliceosome // not recorded//0006397 // mRNA processing // inferred from electronic annotation//0006406 // mRNA export from nucleus // not rec               |                                  |
| NM_011955    | /XR_384565     | 6.56E-04       | 0.0011203     | <b>1.14</b>     | <b>1.38</b> | <b>1.56</b>   | <b>Nubp1</b>                                        | nucleolin binding protein 1                                                                                                                                                        | 0006879 // cellular iron homeostasis // not recorded//0010826 // negative regulation of centrosome duplication // inferred from mutant phenotype//0016049 // cell growth //                |                                  |
| NM_009252    | /XM_01         | 1.85E-04       | 1.10E-04      | <b>1.41</b>     | <b>2.01</b> | <b>1.55</b>   | <b>Serpina3n</b>                                    | serpine (or cysteine) peptidase inhibitor, clade A, member 3N                                                                                                                      | 0006953 // acute-phase response // inferred from electronic annotation//0010466 // negative regulation of peptidase activity // inferred from electronic annotation//0010951 // ne         |                                  |
| NM_009139    | 0.00320978     | 7.29E-05       | 1.07E-05      | <b>-1.05</b>    | <b>1.48</b> | <b>1.55</b>   | <b>Ccl6</b>                                         | chemokine (C-C motif) ligand 6                                                                                                                                                     | 0002548 // monocyte chemotaxis // --//0006935 // chemotaxis // inferred from electronic annotation//0006955 // immune response // inferred from electronic annotation//000:                |                                  |
| NM_001081029 | 7.29E-05       | 7.29E-05       | 1.23E-05      | <b>1.71</b>     | <b>1.54</b> | <b>1.54</b>   | <b>Tmem243</b>                                      | transmembrane protein 243, mitochondrial                                                                                                                                           |                                                                                                                                                                                            |                                  |
| NM_026631    | 7.86E-04       | 0.00137641     | 4.31E-04      | <b>1.25</b>     | <b>1.70</b> | <b>1.54</b>   | <b>Nhp2</b>                                         | NHP2 ribonucleoprotein                                                                                                                                                             | 0006364 // rRNA processing // inferred from electronic annotation//0031118 // rRNA pseudouridine synthesis // inferred from sequence or structural similarity//0042254 // ribosom          |                                  |
| NM_001159646 | /NM_023595     | 0.004399282    | 1.09E-05      | <b>1.25</b>     | <b>1.54</b> | <b>1.54</b>   | <b>Dut</b>                                          | deoxyuridine triphosphatase                                                                                                                                                        | 0006226 // dUMP biosynthetic process // not recorded//0043497 // regulation of protein heterodimerization activity // not recorded//0046080 // dUTP metabolic process // infer             |                                  |
| NM_007534    | /NM_007536     | /NM_00         | 0.00135674    | <b>1.14</b>     | <b>1.69</b> | <b>1.54</b>   | <b>Bcl2a1a</b>                                      | B cell leukemia/lymphoma 2 related protein A1a//B cell leukemia, peroxiredoxin 4                                                                                                   | 0001782 // B cell homeostasis // inferred from direct assay//0002903 // negative regulation of B cell apoptotic process // inferred from direct assay//0006915 // apoptotic proc           |                                  |
| NM_001313711 | /NM_016764     | /XM_000168253  | 3.74E-04      | <b>1.00</b>     | <b>1.30</b> | <b>1.54</b>   | <b>Prdx4</b>                                        | peroxiredoxin 4                                                                                                                                                                    | 0007283 // spermatogenesis // inferred from mutant phenotype//0008584 // male gonad development // inferred from mutant phenotype//0019471 // 4-hydroxyproline metaboli                    |                                  |
| NM_001267695 | /NM_021281     | /XM_000500975  | 0.00346088    | <b>-1.08</b>    | <b>1.17</b> | <b>1.54</b>   | <b>Css</b>                                          | cathepsin S                                                                                                                                                                        | 0002250 // adaptive immune response // inferred from electronic annotation//0005008 // proteolysis // inferred from direct assay//0006508 // proteolysis // not recorded//0006             |                                  |
| NM_01109748  | /NM_016871     | 0.00271894     | 0.00271894    | <b>1.17</b>     | <b>1.54</b> | <b>1.54</b>   | <b>Tomm40</b>                                       | translocase of outer mitochondrial membrane 40 homolog (yeast)                                                                                                                     | 0006626 // protein targeting to mitochondrion // not recorded//0006810 // transport // inferred from electronic annotation//0005811 // ion transport // inferred from electri              |                                  |
| NM_007988    | 0.005565248    | 6.46E-04       | 1.08E-05      | <b>1.65</b>     | <b>1.53</b> | <b>1.53</b>   | <b>Fasn</b>                                         | fatty acid synthase                                                                                                                                                                | 0001649 // osteoblast differentiation // not recorded//0006084 // acetyl-CoA metabolic process // not recorded//0006629 // lipid metabolic process // inferred from electri                |                                  |
| NM_001316995 | /NM_016750     | 1.08E-04       | 1.05E-05      | <b>1.55</b>     | <b>1.53</b> | <b>1.53</b>   | <b>Gm</b>                                           |                                                                                                                                                                                    |                                                                                                                                                                                            |                                  |

| RefSeq       | Transcript ID | p (24h n=460) | p (48h n=657)     | p (72h n=805)     | FC 24h       | FC 48h          | FC 72h                                                            | Gene Symbol                                                                                                                                                                             | Gene Title                                                                                                                                                                            | Gene Ontology Biological Process                                                                                                                                                  |
|--------------|---------------|---------------|-------------------|-------------------|--------------|-----------------|-------------------------------------------------------------------|-----------------------------------------------------------------------------------------------------------------------------------------------------------------------------------------|---------------------------------------------------------------------------------------------------------------------------------------------------------------------------------------|-----------------------------------------------------------------------------------------------------------------------------------------------------------------------------------|
| NM_001172117 | XM_000215644  | 0.001511017   | 2.38E-04          | <b>1.27</b>       | <b>1.34</b>  | <b>1.48</b>     | <b>Hck</b>                                                        | hemopoietic cell kinase                                                                                                                                                                 | 0002376 // immune system process // inferred from electronic annotation//0006468 // protein phosphorylation // inferred from electronic annotation//0006887 // exocytosis // in       |                                                                                                                                                                                   |
| NM_009226    |               | 0.00823008    | 1.27              | 1.18              | <b>1.47</b>  | <b>1.47</b>     | <b>Snrp1</b>                                                      | small nuclear ribonucleoprotein D1                                                                                                                                                      | 0000245 // spliceosomal complex assembly // not recorded//0000387 // spliceosomal snRNP assembly // not recorded//0002230 // positive regulation of defense response to virus         |                                                                                                                                                                                   |
| NM_007573    | 0.0013884     | 0.009837708   | <b>1.31</b>       | <b>1.28</b>       | <b>1.47</b>  | <b>C1qbp</b>    | component component 1, q subcomponent binding protein             | 0000122 // negative regulation of transcription from RNA polymerase II promoter // not recorded//0002250 // adaptive immune response // inferred from electronic annotation//0          |                                                                                                                                                                                       |                                                                                                                                                                                   |
| NM_001161737 | XM_013929     |               | 0.00979084        | <b>1.12</b>       | <b>1.58</b>  | <b>1.47</b>     | <b>Siva1</b>                                                      | SIVA1, apoptosis-inducing factor                                                                                                                                                        | 0006915 // apoptotic process // inferred from electronic annotation//0006924 // activation-induced cell death of T cells // not recorded//0032088 // negative regulation of NF-kapp   |                                                                                                                                                                                   |
| NM_001290660 | NM_024242     |               | 9.34E-04          | <b>1.09</b>       | <b>1.42</b>  | <b>1.47</b>     | <b>Cd302</b>                                                      | CD302 antigen                                                                                                                                                                           | 0006909 // phagocytosis // not recorded                                                                                                                                               |                                                                                                                                                                                   |
| NM_008050    | XM_006523728  | XM_007315373  |                   | <b>1.06</b>       | <b>1.27</b>  | <b>1.46</b>     | <b>LOC105242669</b> // <b>LOC105243270</b>                        | 40S ribosomal protein S2 pseudogene//40S ribosomal protein S2-yrdc domain containing (E.coli)                                                                                           | 0002660 // ribosomal small subunit assembly // not recorded//0001731 // formation of translation preinitiation complex // not recorded//0006412 // translation // inferred from ele   |                                                                                                                                                                                   |
| NM_153566    | 7.57E-04      | 0.003407072   | <b>1.26</b>       | <b>1.24</b>       | <b>1.46</b>  | <b>Yrdc</b>     | yrdc domain containing (E.coli)                                   | 0051051 // negative regulation of transport // not recorded                                                                                                                             |                                                                                                                                                                                       |                                                                                                                                                                                   |
| NM_001025779 | XM_01164734   | XM_001022888  |                   | <b>1.07</b>       | <b>1.43</b>  | <b>1.46</b>     | <b>Cdc6</b>                                                       | cell division cycle 6                                                                                                                                                                   | 0006260 // DNA replication // inferred from electronic annotation//0006270 // DNA replication initiation // inferred from electronic annotation//0007049 // cell cycle // inferred fr |                                                                                                                                                                                   |
| NM_024245    | XM_006511452  | XM_005921938  |                   | <b>1.06</b>       | <b>1.27</b>  | <b>1.46</b>     | <b>Kif23</b>                                                      | kinasin family member 23                                                                                                                                                                | 0000281 // mitotic cytokinesis // not recorded//0000910 // cytokinesis // not recorded//0007018 // microtubule-based movement // not recorded//0007049 // cell cycle // infer         |                                                                                                                                                                                   |
| NM_031198    | XM_006505035  | XM_000699567  |                   | <b>1.20</b>       | <b>1.48</b>  | <b>1.46</b>     | <b>Tjfc</b>                                                       | transcription factor EC                                                                                                                                                                 | 0006351 // transcription, DNA-templated // inferred from electronic annotation//0006355 // regulation of transcription, DNA-templated // not recorded//0006366 // transcription I     |                                                                                                                                                                                   |
| NM_019432    | XR_878316     | 0.001244167   | 5.82E-04          | <b>1.09</b>       | <b>1.71</b>  | <b>1.46</b>     | <b>Tmem37</b>                                                     | transmembrane protein 37                                                                                                                                                                | 0006810 // transport // inferred from electronic annotation//0006811 // ion transport // inferred from electronic annotation//0006816 // calcium ion transport // inferred from ele   |                                                                                                                                                                                   |
| NM_033073    | 0.00112779    | 0.00109445    | <b>1.00</b>       | <b>1.39</b>       | <b>1.45</b>  | <b>Krt7</b>     | keratin 7                                                         | 0005468 // protein phosphorylation // inferred from electronic annotation//0007093 // mitotic cell cycle checkpoint // inferred from electronic annotation//0016310 // phosphoryl       |                                                                                                                                                                                       |                                                                                                                                                                                   |
| NM_001110265 | XM_001284272  | XM_0094545    |                   | <b>1.21</b>       | <b>1.28</b>  | <b>1.45</b>     | <b>Ttk</b>                                                        | TK protein kinase                                                                                                                                                                       | 0002317 // plasma cell phosphorylation // inferred from direct assay//0006915 // apoptotic process // inferred from electronic annotation//0007157 // heterophilic cell-cell adhesio  |                                                                                                                                                                                   |
| NM_008495    | 0.007370463   | 0.00202557    | <b>1.12</b>       | <b>1.53</b>       | <b>1.45</b>  | <b>Lgals1</b>   | lectin, galactose binding, soluble 1                              | 0000054 // ribosomal subunit export from nucleus // not recorded//0000055 // ribosomal large subunit export from nucleus // not recorded//0000056 // ribosomal small subunit ex         |                                                                                                                                                                                       |                                                                                                                                                                                   |
| NM_009391    | XM_006504280  | XM_000249048  |                   | <b>1.14</b>       | <b>1.31</b>  | <b>1.45</b>     | <b>LOC102641332</b> // <b>Ran</b>                                 | GTP-binding nuclear protein Ran//RAN, member RAS oncogene fa                                                                                                                            | 0006260 // DNA replication // inferred from electronic annotation//0006268 // DNA unwinding involved in DNA replication // inferred from direct assay//0006270 // DNA replicatio      |                                                                                                                                                                                   |
| NM_008564    | 0.006E-04     | 0.00233453    | <b>1.10</b>       | <b>1.32</b>       | <b>1.45</b>  | <b>Mcm2</b>     | minichromosome maintenance deficient 2 mitotin (S. cerevisiae)    | 0006260 // DNA replication // inferred from electronic annotation//0006268 // DNA unwinding involved in DNA replication // inferred from direct assay//0006270 // DNA replicatio        |                                                                                                                                                                                       |                                                                                                                                                                                   |
| NM_001164733 | XM_001164734  | 2.81E-04      | <b>1.13</b>       | <b>1.43</b>       | <b>1.45</b>  | <b>Mgp6</b>     | membrane protein, palmitoylated 6                                 | 0046037 // GMP metabolic process // inferred from sequence of structural similarity//0046710 // GDP metabolic process // inferred from sequence of structural similarity//004692        |                                                                                                                                                                                       |                                                                                                                                                                                   |
| NM_023587    | XM_006522570  | XM_001676333  |                   | <b>1.02</b>       | <b>1.35</b>  | <b>1.45</b>     | <b>Hacd2</b>                                                      | 3-hydroxyacyl-CoA dehydratase 2                                                                                                                                                         | 0006629 // lipid metabolic process // inferred from electronic annotation//0006631 // fatty acid metabolic process // inferred from electronic annotation//0006633 // fatty acid bi   |                                                                                                                                                                                   |
| NM_026545    | 0.001469113   | 0.00146929    | <b>1.04</b>       | <b>1.34</b>       | <b>1.45</b>  | <b>PsmA8</b>    | proteasome (prosome, macropain) 26S subunit, non-ATPase, 8        | 0006508 // proteolysis // inferred from electronic annotation//0031647 // regulation of protein stability // not recorded//0043161 // proteasome-mediated ubiquitin-dependent pr        |                                                                                                                                                                                       |                                                                                                                                                                                   |
| NM_007413    | 0.000711548   | 0.00241723    | <b>1.16</b>       | <b>1.33</b>       | <b>1.45</b>  | <b>Adora2b</b>  | adenosine A2b receptor                                            | 0001973 // adenosine receptor signaling pathway // inferred from electronic annotation//0002882 // positive regulation of chronic inflammatory response to non-antigenic stimulus       |                                                                                                                                                                                       |                                                                                                                                                                                   |
| NM_134156    | XM_006515384  | XM_000780949  |                   | <b>1.05</b>       | <b>1.34</b>  | <b>1.45</b>     | <b>Actn1</b>                                                      | actinin, alpha 1                                                                                                                                                                        | 0007015 // actin filament organization // not recorded//0030220 // platelet formation // not recorded//0030865 // cortical cytoskeleton organization // traceable autor stemmen       |                                                                                                                                                                                   |
| NM_010516    | 0.002322059   | 0.00254977    | <b>-1.01</b>      | <b>1.48</b>       | <b>1.44</b>  | <b>Cyr61</b>    | cysteine rich protein 61                                          | 0001558 // regulation of cell growth // inferred from electronic annotation//0001649 // osteoblast differentiation // inferred from genetic interaction//0001934 // positive regulatio  |                                                                                                                                                                                       |                                                                                                                                                                                   |
| NM_008568    | XM_006504555  | XM_125E-04    | 0.00292747        | <b>1.01</b>       | <b>1.46</b>  | <b>1.44</b>     | <b>Mcm7</b>                                                       | minichromosome maintenance deficient 7 (S. cerevisiae)                                                                                                                                  | 0006260 // DNA replication // inferred from electronic annotation//0006268 // DNA unwinding involved in DNA replication // inferred from physical interaction//0006270 // DNA replic  |                                                                                                                                                                                   |
| NM_011950    | 0.002006226   | 1.25E-04      | <b>1.16</b>       | <b>1.27</b>       | <b>1.43</b>  | <b>Mpk13</b>    | mitogen-activated protein kinase 13                               | 0001616 // MAPK cascade // not recorded//0006351 // transcription, DNA-templated // inferred from electronic annotation//0006355 // regulation of transcription, DNA-templated          |                                                                                                                                                                                       |                                                                                                                                                                                   |
| NM_016957    | 0.007600313   | 1.25E-04      | <b>1.06</b>       | <b>1.63</b>       | <b>1.43</b>  | <b>Hmgm2</b>    | high mobility group nucleosomal binding domain 2                  | 0000122 // negative regulation of transcription from RNA polymerase II promoter // inferred from mutant phenotype//0006357 // regulation of transcription from RNA polymerase I         |                                                                                                                                                                                       |                                                                                                                                                                                   |
| NM_001163476 | XM_027014     | XM_00143673   | 7.49E-04          | <b>1.08</b>       | <b>1.27</b>  | <b>1.43</b>     | <b>Gins1</b>                                                      | GINS complex subunit 1 (Psf1 homolog)                                                                                                                                                   | 0001833 // inner cell mass cell proliferation // inferred from mutant phenotype//0006260 // DNA replication // inferred from mutant phenotype//1902983 // DNA strand elongati         |                                                                                                                                                                                   |
| NM_027430    | 0.004797708   | 0.008045459   | <b>1.08</b>       | <b>1.40</b>       | <b>1.43</b>  | <b>Mpc2</b>     | mitochondrial pyruvate carrier 2                                  | 0006909 // pyruvate metabolic process // inferred from genetic interaction//0006810 // transport // inferred from electronic annotation//0006850 // mitochondrial pyruvate elongat      |                                                                                                                                                                                       |                                                                                                                                                                                   |
| NM_001252563 | XM_013592     | XM_000845459  |                   | <b>-1.07</b>      | <b>-1.32</b> | <b>1.43</b>     | <b>Matn4</b>                                                      | matrilin 4                                                                                                                                                                              | 0048678 // response to axon injury // inferred from direct assay                                                                                                                      |                                                                                                                                                                                   |
| NM_008563    | 9.13E-04      | 0.00684152    | <b>1.11</b>       | <b>1.30</b>       | <b>1.43</b>  | <b>Mcm3</b>     | minichromosome maintenance deficient 3 (S. cerevisiae)            | 0006260 // DNA replication // inferred from electronic annotation//0006270 // DNA replication initiation // inferred from electronic annotation//0007049 // cell cycle // inferred fr   |                                                                                                                                                                                       |                                                                                                                                                                                   |
| NM_133807    | 0.004138883   | 1.01E-04      | <b>1.12</b>       | <b>1.24</b>       | <b>1.43</b>  | <b>Lrrc59</b>   | leucine rich repeat containing 59                                 | 0000278 // mitotic cell cycle // not recorded//0002724 // regulation of T cell cytokine production // inferred from mutant phenotype//0002730 // regulation of dendritic cell cytokin   |                                                                                                                                                                                       |                                                                                                                                                                                   |
| NM_001081363 | XM_006497119  | 0.00111868    | <b>-1.04</b>      | <b>1.20</b>       | <b>1.43</b>  | <b>Cenpf</b>    | centromere protein F                                              | 0000278 // mitotic cell cycle // not recorded//0002724 // regulation of T cell cytokine production // inferred from mutant phenotype//0002730 // regulation of dendritic cell cytokin   |                                                                                                                                                                                       |                                                                                                                                                                                   |
| NM_001163489 | XM_001163490  | 9.64E-04      | <b>1.15</b>       | <b>1.29</b>       | <b>1.42</b>  | <b>Sema4a</b>   | sema domain, immunoglobulin domain (lg), transmembrane doma       | 0001525 // angiogenesis // inferred from electronic annotation//0001755 // neural crest cell migration // not recorded//0002250 // adaptive immune response // inferred from elec       |                                                                                                                                                                                       |                                                                                                                                                                                   |
| NM_001287738 | NM_416E-04    |               | <b>1.35</b>       | <b>1.29</b>       | <b>1.42</b>  | <b>Cebpb</b>    | CCAAT/enhancer binding protein (CEBP), beta                       | 0001541 // ovarian follicle development // inferred from mutant phenotype//0001892 // embryonic placenta development // inferred from genetic interaction//0002432 // granulo           |                                                                                                                                                                                       |                                                                                                                                                                                   |
| NM_001102404 | XM_001102405  | 5.36E-04      | 1.89E-04          | <b>1.03</b>       | <b>1.49</b>  | <b>1.42</b>     | <b>Acp5</b>                                                       | acid phosphatase 5, tartrate resistant                                                                                                                                                  | 0006470 // protein dephosphorylation // inferred from electronic annotation//0001631 // dephosphorylation // inferred from direct assay//0032496 // response to lipopolysacchar       |                                                                                                                                                                                   |
| NM_001141975 | XM_001141976  | 0.005837853   | 0.00813172        | <b>1.06</b>       | <b>1.23</b>  | <b>1.42</b>     | <b>Tpx2</b>                                                       | TPX2, microtubule-associated protein homolog (Xenopus laevis)                                                                                                                           | 0006915 // apoptotic process // inferred from electronic annotation//0007049 // cell cycle // inferred from electronic annotation//0007067 // mitotic nuclear division // inferred fr |                                                                                                                                                                                   |
| NM_008892    | XM_006527905  | XR_878095     | XR_1.04           | <b>1.15</b>       | <b>1.42</b>  | <b>1.42</b>     | <b>Polo1</b>                                                      | polymerase (DNA directed), alpha 1                                                                                                                                                      | 0000731 // DNA synthesis involved in DNA repair // inferred from sequence of structural similarity//0006260 // DNA replication // inferred from direct assay//0006260 // DNA replic   |                                                                                                                                                                                   |
| NM_007421    | 0.002353767   | 0.002353767   | <b>1.12</b>       | <b>1.69</b>       | <b>1.42</b>  | <b>Acss1</b>    | adenylosuccinate synthetase like 1                                | 0006163 // purine nucleotide metabolic process // inferred from direct assay//0006164 // purine nucleotide biosynthetic process // inferred from electronic annotation//0006167 //      |                                                                                                                                                                                       |                                                                                                                                                                                   |
| NM_001127382 | XM_001291226  | XM_139065     |                   | <b>1.04</b>       | <b>1.05</b>  | <b>1.42</b>     | <b>Rbm17</b>                                                      | RNA binding motif protein 47                                                                                                                                                            | 0001284 // hematopoietic progenitor cell differentiation // inferred from mutant phenotype//0001554 // cytidine to uridine editing // inferred from genetic interaction               |                                                                                                                                                                                   |
| NM_024045    | 0.0062981     | 0.0062981     | <b>1.09</b>       | <b>1.32</b>       | <b>1.41</b>  | <b>Rab32</b>    | RAB32, member RAS oncogene family                                 | 0006886 // intracellular protein transport // not recorded//0007264 // small GTPase mediated signal transduction // inferred from electronic annotation//0008152 // metabolic pro       |                                                                                                                                                                                       |                                                                                                                                                                                   |
| NM_001304758 | XM_000561732  | XM_000122649  |                   | <b>1.21</b>       | <b>1.34</b>  | <b>1.41</b>     | <b>Coq7</b>                                                       | dihydroxy-7-O                                                                                                                                                                           | 0000122 // negative regulation of transcription from RNA polymerase II promoter // not recorded//0001306 // age-dependent response to oxidative stress // inferred from mutant p      |                                                                                                                                                                                   |
| NM_023258    | 0.006158922   | 8.27E-04      | <b>1.09</b>       | <b>1.27</b>       | <b>1.41</b>  | <b>Pycard</b>   | PYD and CARD domain containing                                    | 0001773 // myeloid dendritic cell activation // not recorded//0002218 // activation of innate immune response // inferred from mutant phenotype//0002218 // activation of innate        |                                                                                                                                                                                       |                                                                                                                                                                                   |
| NM_001110233 | XM_001110234  | XM_000945777  |                   | <b>1.43E-04</b>   | <b>1.19</b>  | <b>1.29</b>     | <b>Nfrap1</b>                                                     | nerve growth factor receptor (TRFRS16) associated protein 1                                                                                                                             | 0006915 // apoptotic process // inferred from electronic annotation//000825 // extrinsic apoptotic signaling pathway via death domain receptors // inferred from physical interacti   |                                                                                                                                                                                   |
| NM_0010120   | XM_00         | 2.40E-04      | 0.00103513        | <b>1.32</b>       | <b>1.30</b>  | <b>1.41</b>     | <b>Ejfla</b>                                                      | eukaryotic translation initiation factor 1A                                                                                                                                             | 0006412 // translation // inferred from electronic annotation//0006413 // translational initiation // inferred from electronic annotation                                             |                                                                                                                                                                                   |
| NM_008704    | 0.00352848    | 0.001617629   | <b>1.23</b>       | <b>1.26</b>       | <b>1.41</b>  | <b>Nme1</b>     | NME/NM23 nucleoside diphosphate kinase 1                          | 0002762 // negative regulation of myeloid leukocyte differentiation // not recorded//0006163 // purine nucleotide metabolic process // not recorded//0006165 // nucleoside diph         |                                                                                                                                                                                       |                                                                                                                                                                                   |
| NM_011712    | 0.0039809     | 1.18          | <b>1.15</b>       | <b>1.41</b>       | <b>1.41</b>  | <b>Wbp5</b>     | WW domain binding protein 5                                       | 0006357 // regulation of transcription from RNA polymerase II promoter // not recorded                                                                                                  |                                                                                                                                                                                       |                                                                                                                                                                                   |
| NM_134081    | 0.00228481    | -1.02         | <b>1.11</b>       | <b>1.40</b>       | <b>1.40</b>  | <b>Dnaj9</b>    | Dnaj (Hsp40) homolog, subfamily C, member 9                       | 0002371 // positive regulation of ATPase activity // not recorded//0003176 // social behavior // inferred from electronic annotation                                                    |                                                                                                                                                                                       |                                                                                                                                                                                   |
| NM_001159631 | XM_0012606    | XM_0003730991 |                   | <b>5.51E-04</b>   | <b>1.14</b>  | <b>1.27</b>     | <b>Nk6</b>                                                        | NIMA (never in mitosis gene a)-related expressed kinase 6                                                                                                                               | 0006468 // protein phosphorylation // not recorded//0006915 // apoptotic process // inferred from electronic annotation//0007049 // cell cycle // inferred from electronic annotat    |                                                                                                                                                                                   |
| NM_030685    | 0.00627522    | 1.02          | <b>1.19</b>       | <b>1.40</b>       | <b>1.40</b>  | <b>Serp1</b>    | serpin-associated endoplasmic reticulum protein 1                 | 0001501 // skeletal system development // inferred from mutant phenotype//0006006 // glucose metabolic process // inferred from mutant phenotype//0006486 // protein glycos             |                                                                                                                                                                                       |                                                                                                                                                                                   |
| NM_026114    | 0.00613033    | 1.22          | <b>1.35</b>       | <b>1.40</b>       | <b>1.40</b>  | <b>Ejfs2</b>    | eukaryotic translation initiation factor 2, subunit 1 alpha       | 0002230 // positive regulation of defense response to virus by host // not recorded//0006412 // translation // inferred from direct assay//0006413 // translational initiation // not r |                                                                                                                                                                                       |                                                                                                                                                                                   |
| NM_008039    | 0.00678349    | -1.00         | <b>1.41</b>       | <b>1.40</b>       | <b>1.40</b>  | <b>Fpr2</b>     | formyl peptide receptor 2                                         | 0006935 // chemotaxis // inferred from electronic annotation//0007165 // signal transduction // inferred from electronic annotation//0007186 // G-protein coupled receptor signa        |                                                                                                                                                                                       |                                                                                                                                                                                   |
| NM_023203    | 0.004964043   | 3.70E-04      | <b>1.11</b>       | <b>1.30</b>       | <b>1.40</b>  | <b>Dtpp1</b>    | dCTP pyrophosphatase 1                                            | 0009143 // nucleoside triphosphate catabolic process // inferred from direct assay//0051289 // protein homotetramerization // inferred from direct assay                                |                                                                                                                                                                                       |                                                                                                                                                                                   |
| NM_028870    | XM_006517418  | 0.008881584   | <b>1.12</b>       | <b>1.31</b>       | <b>1.40</b>  | <b>Ctbb</b>     | clathrin, light polypeptide (Lcb)                                 | 0006886 // intracellular protein transport // inferred from electronic annotation//0016192 // vesicle-mediated transport // inferred from electronic annotation//0072583 // clathrin    |                                                                                                                                                                                       |                                                                                                                                                                                   |
| NM_013552    | XM_006532276  | XM_006532278  |                   | <b>7.92E-04</b>   | <b>-1.02</b> | <b>1.17</b>     | <b>1.40</b>                                                       | <b>Hmnr</b>                                                                                                                                                                             | hyaluronan mediated motility receptor (RHAMM)                                                                                                                                         | 0000122 // negative regulation of transcription from RNA polymerase II promoter // not recorded//0001501 // skeletal system development // inferred from genetic interaction//OC  |
| NM_001301373 | XM_001301375  | 5.74E-04      | <b>1.07</b>       | <b>1.34</b>       | <b>1.40</b>  | <b>Fst</b>      | foliostatin                                                       | 0000122 // negative regulation of transcription from RNA polymerase II promoter // not recorded//0006351 // transcription, DNA-templated // inferred from electronic annotation//00     |                                                                                                                                                                                       |                                                                                                                                                                                   |
| NM_008231    | XM_00         | 0.00589401    | 0.001956797       | <b>1.17</b>       | <b>1.24</b>  | <b>1.40</b>     | <b>Hdaj</b>                                                       | hepatoma-derived growth factor                                                                                                                                                          | 0000904 // cell morphogenesis involved in differentiation // inferred from mutant phenotype//0001701 // in utero embryonic development // inferred from mutant phenotype//00          |                                                                                                                                                                                   |
| NM_001113416 | XM_145506     | XM_006529397  |                   | <b>0.00646311</b> | <b>1.15</b>  | <b>1.15</b>     | <b>1.40</b>                                                       | <b>Epb4115</b>                                                                                                                                                                          | erythrocyte membrane protein band 4.1 like 5                                                                                                                                          | 0006629 // lipid metabolic process // inferred from electronic annotation//0007283 // spermatogenesis // inferred from genetic interaction//0007283 // spermatogenesis // inferre |
| NM_008776    | 6.52E-04      | 1.06          | <b>1.30</b>       | <b>1.40</b>       | <b>1.40</b>  | <b>Pafah1b3</b> | platelet-activating factor acetylhydrolase, isoform 1b, subunit 3 | 0006260 // DNA replication // inferred from mutant phenotype//0006351 // transcription, DNA-templated // inferred from electronic annotation//0006355 // regulation of transcrip        |                                                                                                                                                                                       |                                                                                                                                                                                   |
| NM_031863    | 3.12E-04      | -1.05         | <b>1.19</b>       | <b>1.40</b>       | <b>1.40</b>  | <b>Cenpq</b>    | centromere protein Q                                              | 0006629 // lipid metabolic process // inferred from electronic annotation//0006633 // fatty acid biosynthetic process // inferred from electronic annotation//0006694 // steroid bio    |                                                                                                                                                                                       |                                                                                                                                                                                   |
| NM_009584    | XM_00         | 0.00795411    | <b>1.22</b>       | <b>1.19</b>       | <b>1.39</b>  | <b>Dnaj2</b>    | Dnaj (Hsp40) homolog, subfamily C, member 2                       | 0007155 // cell adhesion // inferred from mutant phenotype//0007155 // cell adhesion // not recorded//0007229 // integrin-mediated signaling pathway // not recorded//000836            |                                                                                                                                                                                       |                                                                                                                                                                                   |
| NM_025436    | 5.88E-05      | 0.0017175     | <b>1.40</b>       | <b>1.55</b>       | <b>1.39</b>  | <b>Msmo1</b>    | methylsterol monooxygenase 1                                      | 0001666 // response to hypoxia // inferred from electronic annotation//0005975 // carbohydrate metabolic process // inferred from electronic annotation//0006089 // lactate met         |                                                                                                                                                                                       |                                                                                                                                                                                   |
| NM_008398    | XM_006513267  | XM_9.65E-04   | <b>0.00743213</b> | <b>1.21</b>       | <b>1.47</b>  | <b>1.39</b>     | <b>Igsa7</b>                                                      | integrin alpha 7                                                                                                                                                                        | 0001930 // cell adhesion // inferred from mutant phenotype//0007155 // cell adhesion // not recorded//0007229 // integrin-mediated signaling pathway // not recorded//000836          |                                                                                                                                                                                   |
| NM_001136069 | XM_8.22E-04   | 2.17E-04      | <b>1.32</b>       | <b>1.42</b>       | <b>1.39</b>  | <b>Ldha</b>     | lactate dehydrogenase A                                           | 0001666 // response to hypoxia // inferred from electronic annotation//0005975 // carbohydrate metabolic process // inferred from electronic annotation//0006089 // lactate met         |                                                                                                                                                                                       |                                                                                                                                                                                   |
| NM_008252    | XM_006509524  | 0.00182127    | <b>1.18</b>       | <b>1.35</b>       | <b>1.39</b>  | <b>Hmgb2</b>    | high mobility group box 2                                         | 0001938 // positive regulation of endothelial cell proliferation // not recorded//0002437 // inflammatory response to antigenic stimulus // inferred from mutant phenotype//00062       |                                                                                                                                                                                       |                                                                                                                                                                                   |
| NM_00130364  | XM_006526707  | XM_8.15E-04   | <b>0.00130364</b> | <b>1.00</b>       | <b>1.29</b>  | <b>1.39</b>     | <b>Incpap</b>                                                     | inner centromere protein                                                                                                                                                                | 0000910 // cytokinesis // not recorded//0007049 // cell cycle // inferred from electronic annotation//0007059 // chromosome segregation // not recorded//0007067 // mitotic nu        |                                                                                                                                                                                   |
| NM_001146057 | XM_001146058  | XM_133348     |                   | <b>9.16E-04</b>   | <b>1.16</b>  | <b>1.38</b>     | <b>Acad7</b>                                                      | acyl-CoA thioesterase 7                                                                                                                                                                 | 0009062 // fatty acid catabolic process // inferred from direct assay//0015937 // coenzyme A biosynthetic process // not recorded//0035114 // medium-chain fatty-acyl-CoA catab       |                                                                                                                                                                                   |
| NM_018865    | XM_006520889  | 0.001789398   | 0.00131109        | <b>1.07</b>       | <b>1.25</b>  | <b>1.38</b>     | <b>Wisp1</b>                                                      | WT11 inducible signaling pathway protein 1                                                                                                                                              | 0001558 // regulation of cell growth // inferred from electronic annotation//0007155 // cell adhesion // not recorded//0007165 // signal transduction // not recorded//0007267 //     |                                                                                                                                                                                   |
| NM_025647    | 0.00938079    | 1.07          | <b>1.25</b>       | <b>1.38</b>       | <b>1.38</b>  | <b>Cmpk1</b>    | cytidine monophosphate (UMP-CMP) kinase 1                         | 0006139 // nucleoside-containing compound metabolic process // inferred from electronic annotation//0006165 // nucleoside diphosphate phosphorylation // not recorded//0006             |                                                                                                                                                                                       |                                                                                                                                                                                   |
| NM_008638    | XM_006505697  | XM_011241245  |                   | <b>0.00152557</b> | <b>1.11</b>  | <b>1.11</b>     | <b>M</b>                                                          |                                                                                                                                                                                         |                                                                                                                                                                                       |                                                                                                                                                                                   |

| RefSeq       | Transcript ID   | p (24h n=460) | p (48h n=657) | p (72h n=805) | FC 24h | FC 48h              | FC 72h                                                           | Gene Symbol                                                                                                                                                                                                                                                                                                                                                                                             | Gene Title                                                                                                                                                                                                                                                                                                                                                                                                                                                                                                                                                    | Gene Ontology Biological Process                                                                                                                                                     |
|--------------|-----------------|---------------|---------------|---------------|--------|---------------------|------------------------------------------------------------------|---------------------------------------------------------------------------------------------------------------------------------------------------------------------------------------------------------------------------------------------------------------------------------------------------------------------------------------------------------------------------------------------------------|---------------------------------------------------------------------------------------------------------------------------------------------------------------------------------------------------------------------------------------------------------------------------------------------------------------------------------------------------------------------------------------------------------------------------------------------------------------------------------------------------------------------------------------------------------------|--------------------------------------------------------------------------------------------------------------------------------------------------------------------------------------|
| NM_001113248 | ///NM_009188    | 5.85E-04      | 0.00715407    | 1.10          | 1.44   | 1.36                | <b>Sin3b</b>                                                     | transcriptional regulator, SIN3B (yeast)                                                                                                                                                                                                                                                                                                                                                                | 0001122 // negative regulation of transcription from RNA polymerase II promoter // not recorded // 0006351 // transcription, DNA-templated // inferred from electronic annotation // 0001501 // skeletal system development // inferred from mutant phenotype // 0006281 // DNA repair // inferred from electronic annotation // 0006282 // regulation of DNA repair // 0005975 // carbohydrate metabolic process // inferred from electronic annotation // 0008152 // metabolic process // inferred from electronic annotation // 0009311 // oligosaccharide |                                                                                                                                                                                      |
| NM_001301414 | ///NM_146144    | 0.006502939   | 0.00988333    | 1.07          | 1.16   | 1.36                | <b>Usp1</b>                                                      | ubiquitin specific peptidase 1                                                                                                                                                                                                                                                                                                                                                                          | 0006810 // metabolic process // inferred from electronic annotation                                                                                                                                                                                                                                                                                                                                                                                                                                                                                           |                                                                                                                                                                                      |
| NM_013463    |                 | 0.004352849   | 0.00464255    | 1.08          | 1.22   | 1.36                | <b>Gla</b>                                                       | galactosidase, alpha                                                                                                                                                                                                                                                                                                                                                                                    | 0005975 // carbohydrate metabolic process // inferred from electronic annotation // 0008152 // metabolic process // inferred from electronic annotation // 0009311 // oligosaccharide                                                                                                                                                                                                                                                                                                                                                                         |                                                                                                                                                                                      |
| NM_026117    | ///NM_20        | 0.00720425    | 0.002177797   | 1.29          | 1.31   | 1.36                | <b>Dedd2</b>                                                     | death effector domain-containing DNA binding protein 2                                                                                                                                                                                                                                                                                                                                                  | 0006351 // transcription, DNA-templated // inferred from electronic annotation // 0006355 // regulation of transcription, DNA-templated // inferred from electronic annotation // 0006506 // GPI anchor biosynthetic process // inferred from mutant phenotype // 0009058 // biosynthetic process // inferred from electronic annotation                                                                                                                                                                                                                      |                                                                                                                                                                                      |
| NM_011081    | ///NM_006528758 | 0.001247793   | 0.00791023    | 1.29          | 1.13   | 1.36                | <b>Piga</b>                                                      | phosphatidylinositol glycan anchor biosynthesis, class A                                                                                                                                                                                                                                                                                                                                                | 0006506 // GPI anchor biosynthetic process // inferred from mutant phenotype // 0009058 // biosynthetic process // inferred from electronic annotation                                                                                                                                                                                                                                                                                                                                                                                                        |                                                                                                                                                                                      |
| NM_008608    |                 | 0.00408104    | -1.02         | 1.24          | 1.36   | <b>Mmp14</b>        | matrix metalloproteinase 14 (membrane-inserted)                  | 0006810 // transport // inferred from electronic annotation // 0006817 // phosphate ion transport // not recorded // 0006839 // mitochondrial transport // not recorded // 0008272 // stathmin 1                                                                                                                                                                                                        |                                                                                                                                                                                                                                                                                                                                                                                                                                                                                                                                                               |                                                                                                                                                                                      |
| NM_019641    |                 | 0.00389318    | -1.03         | 1.12          | 1.36   | <b>Stmn1</b>        | stathmin 1                                                       | 0007019 // microtubule depolymerization // not recorded // 0007052 // microtubule organization // not recorded // 0007275 // multicellular organismal development // inferred from mutant phenotype // 0006506 // transport // inferred from electronic annotation // 0006817 // phosphate ion transport // not recorded // 0006839 // mitochondrial transport // not recorded // 0008272 // stathmin 1 |                                                                                                                                                                                                                                                                                                                                                                                                                                                                                                                                                               |                                                                                                                                                                                      |
| NM_013770    |                 | 0.007988815   | 0.00126833    | 1.05          | 1.32   | 1.36                | <b>Slc25a10</b>                                                  | slc25 carrier family 25 (mitochondrial carrier, dicarboxylate trans                                                                                                                                                                                                                                                                                                                                     | 0006810 // transport // inferred from electronic annotation // 0006817 // phosphate ion transport // not recorded // 0006839 // mitochondrial transport // not recorded // 0008272 // stathmin 1                                                                                                                                                                                                                                                                                                                                                              |                                                                                                                                                                                      |
| NM_008363    | ///NM_006498795 | 2.49E-04      | -1.08         | 1.07          | 1.35   | <b>Iib1b</b>        | interleukin 1 beta                                               | 0000122 // negative regulation of transcription from RNA polymerase II promoter // not recorded // 0000165 // MAPK cascade // not recorded // 0000187 // activation of MAPK activity                                                                                                                                                                                                                    |                                                                                                                                                                                                                                                                                                                                                                                                                                                                                                                                                               |                                                                                                                                                                                      |
| NM_001311790 | ///NM_009982    | 0.006507319   | 0.00122507    | -1.03         | 1.16   | 1.35                | <b>Ctsc</b>                                                      | cathepsin C                                                                                                                                                                                                                                                                                                                                                                                             | 0001913 // T cell mediated cytotoxicity // inferred from genetic interaction // 0006508 // proteolysis // inferred from mutant phenotype // 0006508 // proteolysis // not recorded // 0006810 // transport // inferred from electronic annotation // 0007264 // small GTPase mediated signal transduction // inferred from electronic annotation // 00032456 // endocytic re                                                                                                                                                                                  |                                                                                                                                                                                      |
| NM_177305    |                 | 0.00925302    | -1.01         | 1.21          | 1.35   | <b>Ar4c</b>         | ADP-ribosylation factor-like 4C                                  | 0006810 // transport // inferred from electronic annotation // 0007264 // small GTPase mediated signal transduction // inferred from electronic annotation // 00032456 // endocytic re                                                                                                                                                                                                                  |                                                                                                                                                                                                                                                                                                                                                                                                                                                                                                                                                               |                                                                                                                                                                                      |
| NM_178389    | ///NM_006539217 | 0.006697938   | 4.93E-04      | 1.14          | 1.24   | 1.35                | <b>Gole</b>                                                      | galactose-4-epimerase, UDP                                                                                                                                                                                                                                                                                                                                                                              | 0005975 // carbohydrate metabolic process // inferred from electronic annotation // 0006282 // DNA repair // inferred from electronic annotation // 0006282 // regulation of DNA repair // 0005975 // carbohydrate metabolic process // inferred from electronic annotation // 0008152 // metabolic process // inferred from electronic annotation // 0009311 // oligosaccharide                                                                                                                                                                              |                                                                                                                                                                                      |
| NM_010344    |                 | 7.82E-04      | 0.00190678    | 1.19          | 1.37   | 1.35                | <b>Gsr</b>                                                       | glutathione reductase                                                                                                                                                                                                                                                                                                                                                                                   | 0006749 // glutathione metabolic process // inferred by curator // 0006749 // glutathione metabolic process // not recorded // 0007283 // spermatogenesis // not recorded // 000454                                                                                                                                                                                                                                                                                                                                                                           |                                                                                                                                                                                      |
| NM_133722    |                 | 0.00952294    | 0.007355682   | 1.15          | 1.21   | 1.35                | <b>Abhd17c</b>                                                   | abhydrolase domain containing 17C                                                                                                                                                                                                                                                                                                                                                                       | 0008152 // metabolic process // inferred from electronic annotation                                                                                                                                                                                                                                                                                                                                                                                                                                                                                           |                                                                                                                                                                                      |
| NM_010185    |                 | 7.04E-04      | 1.05          | 1.22          | 1.35   | <b>Fcer1g</b>       | Fc receptor, IgE, high affinity I, gamma polypeptide             | 0001798 // positive regulation of type Ila hypersensitivity // inferred from mutant phenotype // 0001805 // positive regulation of type III hypersensitivity // inferred from mutant phen                                                                                                                                                                                                               |                                                                                                                                                                                                                                                                                                                                                                                                                                                                                                                                                               |                                                                                                                                                                                      |
| NM_001285423 | ///NM_5         | 5.90E-04      | 7.86E-04      | 0.00425993    | 1.33   | 1.46                | 1.35                                                             | <b>Esd</b>                                                                                                                                                                                                                                                                                                                                                                                              | esterase D/fornylglutathione hydrolase                                                                                                                                                                                                                                                                                                                                                                                                                                                                                                                        | 0042694 // formaldehyde catabolic process // inferred from electronic annotation                                                                                                     |
| NM_019568    | ///NM_00        | 4.98E-05      | 1.50          | 1.24          | 1.35   | <b>Cxcl14</b>       | chemokine (C-X-C motif) ligand 14                                | 0006955 // immune response // inferred from electronic annotation // 0045662 // negative regulation of myoblast differentiation // inferred from mutant phenotype // 0048839 // m                                                                                                                                                                                                                       |                                                                                                                                                                                                                                                                                                                                                                                                                                                                                                                                                               |                                                                                                                                                                                      |
| NM_0011479   |                 | 0.00445218    | 2.14E-04      | 0.00382231    | 1.15   | 1.38                | 1.35                                                             | <b>Splic2</b>                                                                                                                                                                                                                                                                                                                                                                                           | serine palmitoyltransferase, long chain base subunit 2                                                                                                                                                                                                                                                                                                                                                                                                                                                                                                        | 0006629 // lipid metabolic process // inferred from electronic annotation // 0006665 // sphingolipid metabolic process // inferred from electronic annotation // 0006686 // sphingom |
| NM_001081212 |                 | 0.00880209    | 1.13          | 1.19          | 1.35   | <b>Irs2</b>         | insulin receptor substrate 2                                     | 0002053 // positive regulation of mesenchymal cell proliferation // inferred from genetic interaction // 0002903 // negative regulation of B cell apoptotic process // inferred from mut                                                                                                                                                                                                                |                                                                                                                                                                                                                                                                                                                                                                                                                                                                                                                                                               |                                                                                                                                                                                      |
| NM_176979    | ///NM_006511706 | 0.006511707   | 8.66E-04      | -1.07         | 1.19   | 1.35                | <b>Topbp1</b>                                                    | topoisomerase (DNA) II binding protein 1                                                                                                                                                                                                                                                                                                                                                                | 0006281 // DNA repair // inferred from electronic annotation // 0006974 // cellular response to DNA damage stimulus // not recorded // 0007131 // mesenchymal metaplastic recombination                                                                                                                                                                                                                                                                                                                                                                       |                                                                                                                                                                                      |
| NM_001048061 | ///NM_010448    | 0.00176346    | -1.06         | 1.14          | 1.35   | <b>Hrrnpab</b>      | heterogeneous nuclear ribonucleoprotein A/B                      | 0001122 // negative regulation of transcription from RNA polymerase II promoter // inferred from genetic interaction // 0001837 // epithelial to mesenchymal transition // inferred fr                                                                                                                                                                                                                  |                                                                                                                                                                                                                                                                                                                                                                                                                                                                                                                                                               |                                                                                                                                                                                      |
| NM_178376    |                 | 0.00603244    | -1.01         | 1.12          | 1.35   | <b>Rraga</b>        | Ras-related GTP binding A                                        | 0006915 // apoptotic process // inferred from electronic annotation // 0008219 // cell death // not recorded // 0009267 // cellular response to starvation // not recorded // 0010506                                                                                                                                                                                                                   |                                                                                                                                                                                                                                                                                                                                                                                                                                                                                                                                                               |                                                                                                                                                                                      |
| NM_001177609 | ///NM_001177610 | 0.0011665     | 1.06          | 1.27          | 1.34   | <b>LOC102641751</b> | <b>Ube2l</b>                                                     | 0001122 // negative regulation of transcription from RNA polymerase II promoter // inferred from mutant phenotype // 0000122 // negative regulation of transcription from RNA pol                                                                                                                                                                                                                       |                                                                                                                                                                                                                                                                                                                                                                                                                                                                                                                                                               |                                                                                                                                                                                      |
| NM_007793    |                 | 2.35E-04      | 0.00707683    | 1.15          | 1.48   | 1.34                | <b>Cstb</b>                                                      | cystatin B                                                                                                                                                                                                                                                                                                                                                                                              | 0008344 // adult locomotory behavior // inferred from mutant phenotype // 0010466 // negative regulation of peptidase activity // not recorded // 0010951 // negative regulation of                                                                                                                                                                                                                                                                                                                                                                           |                                                                                                                                                                                      |
| NM_025407    |                 | 0.00887697    | 1.07          | 1.34          | 1.34   | <b>Uqcrc1</b>       | ubiquinol-cytochrome c reductase core protein 1                  | 0006122 // mitochondrial electron transport, ubiquinol to cytochrome c // inferred from direct assay // 0006810 // transport // inferred from electronic annotation // 0009060 // aerc                                                                                                                                                                                                                  |                                                                                                                                                                                                                                                                                                                                                                                                                                                                                                                                                               |                                                                                                                                                                                      |
| NM_009127    |                 | 0.00303949    | 1.21          | 1.33          | 1.34   | <b>Scd1</b>         | stearoyl-Coenzyme A desaturase 1                                 | 0006629 // lipid metabolic process // inferred from electronic annotation // 0006631 // fatty acid metabolic process // inferred from electronic annotation // 0006633 // fatty acid bio                                                                                                                                                                                                                |                                                                                                                                                                                                                                                                                                                                                                                                                                                                                                                                                               |                                                                                                                                                                                      |
| NR_002840    | ///NR_028543    | 0.008075489   | 1.47          | 1.57          | 1.34   | <b>Gas5</b>         | <b>Snord47</b>                                                   | growth arrest specific 5 // small nucleolar RNA, C/D box 47                                                                                                                                                                                                                                                                                                                                             | 0007049 // cell cycle // inferred from electronic annotation // 0007067 // mitotic nuclear division // inferred from electronic annotation // 0008152 // metabolic process // inferred fr                                                                                                                                                                                                                                                                                                                                                                     |                                                                                                                                                                                      |
| NM_146235    |                 | 0.00234453    | 1.07          | 1.12          | 1.34   | <b>Erc6l</b>        | excision repair cross-complementing rodent repair deficiency com | 0007049 // cell cycle // inferred from electronic annotation // 0007067 // mitotic nuclear division // inferred from electronic annotation // 0008152 // metabolic process // inferred fr                                                                                                                                                                                                               |                                                                                                                                                                                                                                                                                                                                                                                                                                                                                                                                                               |                                                                                                                                                                                      |
| NM_134122    |                 | 0.00520098    | -1.02         | 1.21          | 1.34   | <b>Nrm</b>          | neurin (nuclear envelope membrane protein)                       | 0009966 // regulation of signal transduction // inferred from electronic annotation // 0031648 // protein destabilization // not recorded // 0043254 // regulation of protein complex                                                                                                                                                                                                                   |                                                                                                                                                                                                                                                                                                                                                                                                                                                                                                                                                               |                                                                                                                                                                                      |
| NM_134009    |                 | 0.00122125    | 1.03          | 1.15          | 1.34   | <b>Ncln</b>         | nuclear lamin homolog (zebrafish)                                | 0009966 // regulation of signal transduction // inferred from electronic annotation // 0031648 // protein destabilization // not recorded // 0043254 // regulation of protein complex                                                                                                                                                                                                                   |                                                                                                                                                                                                                                                                                                                                                                                                                                                                                                                                                               |                                                                                                                                                                                      |
| NM_0111333   | ///NM_006515598 | 0.006515599   | 0.00143837    | 1.05          | 1.21   | 1.34                | <b>Pole2</b>                                                     | polyomerase (DNA directed), epsilon 2 (p59 subunit)                                                                                                                                                                                                                                                                                                                                                     | 0006260 // DNA replication // inferred from electronic annotation // 0006261 // DNA-dependent DNA replication // not recorded // 0042276 // error-prone translesion synthesis // nc                                                                                                                                                                                                                                                                                                                                                                           |                                                                                                                                                                                      |
| NM_009026    | ///NM_011248826 | 0.0026964     | 1.14          | 1.22          | 1.34   | <b>Rasd1</b>        | RAS, dexamethasone-induced 1                                     | 0007165 // signal transduction // inferred from electronic annotation // 0007263 // nitric oxide mediated signal transduction // not recorded // 0007264 // small GTPase mediated sig                                                                                                                                                                                                                   |                                                                                                                                                                                                                                                                                                                                                                                                                                                                                                                                                               |                                                                                                                                                                                      |
| NM_025569    | ///NM_029392    | 2.49E-04      | 0.00328841    | 1.15          | 1.57   | 1.34                | <b>Mgst3</b>                                                     | mitoxaminal glutathione S-transferase 3                                                                                                                                                                                                                                                                                                                                                                 | 0102423 // response to organonitrogen compound // inferred from electronic annotation // 0055114 // oxidation-reduction process // not recorded                                                                                                                                                                                                                                                                                                                                                                                                               |                                                                                                                                                                                      |
| NM_001025477 | ///NM_001039356 | 0.00587571    | 0.00137316    | 1.11          | 1.38   | 1.33                | <b>Hmgai1</b>                                                    | <b>Hmgai1-rs1</b>                                                                                                                                                                                                                                                                                                                                                                                       | high mobility group AT-hook 1 // high mobility group AT-hook 1, rel                                                                                                                                                                                                                                                                                                                                                                                                                                                                                           |                                                                                                                                                                                      |
| NM_016867    | ///NM_01        | 0.00494418    | 1.15          | 1.34          | 1.33   | <b>Gipz2</b>        | GIPC PDZ domain containing family, member 2                      | 0006284 // base-excision repair // not recorded // 0006351 // transcription, DNA-templated // inferred from electronic annotation // 0006355 // regulation of transcription, DNA-tem                                                                                                                                                                                                                    |                                                                                                                                                                                                                                                                                                                                                                                                                                                                                                                                                               |                                                                                                                                                                                      |
| NM_011662    |                 | 0.00186258    | -1.25         | 1.09          | 1.33   | <b>Tyrbp</b>        | TYRO protein tyrosine kinase binding protein                     | 0002281 // macrophage activation involved in immune response // inferred from mutant phenotype // 0002283 // neutrophil activation involved in immune response // inferred from                                                                                                                                                                                                                         |                                                                                                                                                                                                                                                                                                                                                                                                                                                                                                                                                               |                                                                                                                                                                                      |
| NM_138656    | ///NR_021       | 0.00438684    | 0.0038585     | 1.18          | 1.35   | 1.33                | <b>Mvd</b>                                                       | mevalonate (diphospho) decarboxylase                                                                                                                                                                                                                                                                                                                                                                    | 0006629 // lipid metabolic process // inferred from electronic annotation // 0006694 // steroid biosynthetic process // inferred from electronic annotation // 0006695 // cholesterol b                                                                                                                                                                                                                                                                                                                                                                       |                                                                                                                                                                                      |
| NM_001302389 | ///NM_001302390 | 0.0013024     | 0.00353198    | 1.12          | 1.23   | 1.33                | <b>Ppp2c</b>                                                     | phosphoinositid phosphatase 2                                                                                                                                                                                                                                                                                                                                                                           | 0006644 // phospholipid metabolic process // not recorded // 0007155 // signal transduction // not recorded // 0003148 // sphingolipid biosynthetic process // not recorded // 000468                                                                                                                                                                                                                                                                                                                                                                         |                                                                                                                                                                                      |
| NM_015897    |                 | 0.002421028   | 0.00782959    | 1.12          | 1.30   | 1.33                | <b>Timm23</b>                                                    | translocase of inner mitochondrial membrane 23                                                                                                                                                                                                                                                                                                                                                          | 0006810 // transport // inferred from electronic annotation // 0006886 // intracellular protein transport // inferred from electronic annotation // 0015031 // protein transport // infer                                                                                                                                                                                                                                                                                                                                                                     |                                                                                                                                                                                      |
| NM_00117752  | ///NM_2         | 3.16E-04      | 1.31          | 1.58          | 1.33   | <b>Myc</b>          | myelocytomatosis oncogene                                        | 0001122 // negative regulation of transcription from RNA polymerase II promoter // inferred from direct assay // 0000122 // negative regulation of transcription from RNA polymer                                                                                                                                                                                                                       |                                                                                                                                                                                                                                                                                                                                                                                                                                                                                                                                                               |                                                                                                                                                                                      |
| NM_018868    | ///NM_00        | 3.43E-04      | 1.45E-04      | 1.38          | 1.51   | 1.33                | <b>Nup58</b>                                                     | NOP58 ribonucleoprotein                                                                                                                                                                                                                                                                                                                                                                                 | 000154 // rRNA modification // not recorded // 0006608 // snRNP protein import into nucleus // not recorded // 0004254 // rNosome biogenesis // inferred from electronic annot                                                                                                                                                                                                                                                                                                                                                                                |                                                                                                                                                                                      |
| NM_021890    | ///NM_00527247  | 0.006527248   | 6.92E-04      | -1.02         | 1.24   | 1.33                | <b>Fads3</b>                                                     | fatty acid desaturase 3                                                                                                                                                                                                                                                                                                                                                                                 | 0006629 // lipid metabolic process // inferred from electronic annotation // 0006631 // fatty acid metabolic process // inferred from electronic annotation // 0006623 // fatty acid bio                                                                                                                                                                                                                                                                                                                                                                      |                                                                                                                                                                                      |
| NM_001163359 | ///NM_001163360 | 0.00676525    | 0.00237366    | 1.08          | 1.24   | 1.33                | <b>Figln1</b>                                                    | figetin-like 1                                                                                                                                                                                                                                                                                                                                                                                          | 0001649 // osteoblast differentiation // inferred from mutant phenotype // 0010569 // regulation of double-strand break repair via homologous recombination // not recorded // 0003                                                                                                                                                                                                                                                                                                                                                                           |                                                                                                                                                                                      |
| NM_010188    | ///NM_006496658 | 0.006496659   | 0.00803502    | -1.10         | 1.12   | 1.33                | <b>Fcgr3</b>                                                     | Fc receptor, IgG, low affinity III                                                                                                                                                                                                                                                                                                                                                                      | 0001788 // antibody-dependent cellular cytotoxicity // inferred from mutant phenotype // 0001798 // positive regulation of type Ila hypersensitivity // inferred from mutant phenoty                                                                                                                                                                                                                                                                                                                                                                          |                                                                                                                                                                                      |
| NM_025844    | ///NM_00        | 0.00209594    | 0.0054329     | 1.53          | 1.03   | 1.33                | <b>Chordc1</b>                                                   | cysteine and histidine-rich domain (CHORD)-containing, zinc-bindin                                                                                                                                                                                                                                                                                                                                      | 0010824 // regulation of centrosome duplication // inferred from mutant phenotype // 00061077 // chaperone-mediated protein folding // inferred from direct assay // 1900034 // reg                                                                                                                                                                                                                                                                                                                                                                           |                                                                                                                                                                                      |
| NM_007856    | ///NM_006508476 | 0.006508477   | 0.00593382    | 1.16          | 1.28   | 1.33                | <b>Dhcr7</b>                                                     | 7-dehydrocholesterol reductase                                                                                                                                                                                                                                                                                                                                                                          | 0001568 // blood vessel development // inferred from mutant phenotype // 0006629 // lipid metabolic process // inferred from electronic annotation // 0006694 // steroid biosynth                                                                                                                                                                                                                                                                                                                                                                             |                                                                                                                                                                                      |
| NM_198613    |                 | 0.00448233    | 1.00          | 1.24          | 1.32   | <b>Ap2s1</b>        | adaptor-related protein complex 2, sigma 1 subunit               | 0006810 // transport // inferred from electronic annotation // 0006886 // intracellular protein transport // inferred from electronic annotation // 0006897 // endocytosis // inferred fr                                                                                                                                                                                                               |                                                                                                                                                                                                                                                                                                                                                                                                                                                                                                                                                               |                                                                                                                                                                                      |
| NM_001310469 | ///NM_4         | 4.33E-05      | 0.00640368    | 1.69          | 1.31   | 1.32                | <b>Osmr</b>                                                      | osteostatin M receptor                                                                                                                                                                                                                                                                                                                                                                                  | 0007166 // cell surface receptor signaling pathway // traceable after interaction // 0008284 // positive regulation of cell proliferation // not recorded // 0034097 // response to cyto                                                                                                                                                                                                                                                                                                                                                                      |                                                                                                                                                                                      |
| NM_007950    |                 | 0.00442727    | 0.001884708   | 1.37          | 1.66   | 1.32                | <b>Ereg</b>                                                      | epiregulin                                                                                                                                                                                                                                                                                                                                                                                              | 0000187 // activation of MAPK activity // not recorded // 0001525 // angiogenesis // inferred from electronic annotation // 0001550 // ovarian cumulus expansion // not recorded // 000122                                                                                                                                                                                                                                                                                                                                                                    |                                                                                                                                                                                      |
| NM_001199431 | ///NM_001199432 | 0.0011994     | 0.00999741    | 1.03          | 1.22   | 1.32                | <b>Dnmt1</b>                                                     | DNA methyltransferase (cytosine-5) 1                                                                                                                                                                                                                                                                                                                                                                    | 0002376 // immune system process // inferred from electronic annotation // 0019886 // antigen processing and presentation of exogenous peptide antigen via MHC class II // inferred                                                                                                                                                                                                                                                                                                                                                                           |                                                                                                                                                                                      |
| NM_023065    |                 | 0.00112659    | -1.15         | 1.13          | 1.32   | <b>Ifj30</b>        | interferon gamma inducible protein 30                            | 0002376 // immune system process // inferred from electronic annotation // 0019886 // antigen processing and presentation of exogenous peptide antigen via MHC class II // inferred                                                                                                                                                                                                                     |                                                                                                                                                                                                                                                                                                                                                                                                                                                                                                                                                               |                                                                                                                                                                                      |
| NM_001302346 | ///NM_001302347 | 0.0008773     | 0.00770895    | 1.18          | 1.17   | 1.32                | <b>P2ry2</b>                                                     | purinergic receptor P2Y, G-protein coupled 2                                                                                                                                                                                                                                                                                                                                                            | 0001701 // in utero embryonic development // inferred from electronic annotation // 0007165 // signal transduction // inferred from electronic annotation // 0007186 // G-protein cc                                                                                                                                                                                                                                                                                                                                                                          |                                                                                                                                                                                      |
| NM_022415    |                 | 0.00498024    | 7.36E-05      | 1.16          | 1.45   | 1.32                | <b>Ptges</b>                                                     | prostaglandin H synthase                                                                                                                                                                                                                                                                                                                                                                                | 0001516 // prostaglandin biosynthetic process // not recorded // 0002526 // acute inflammatory response // inferred from electronic annotation // 0002544 // chronic inflammatory                                                                                                                                                                                                                                                                                                                                                                             |                                                                                                                                                                                      |
| NM_009270    |                 | 2.66E-04      | 1.31          | 1.47          | 1.32   | <b>Sale</b>         | squalene epoxidase                                               | 0006725 // cellular aromatic compound metabolic process // not recorded // 0008203 // cholesterol metabolic process // not recorded // 0010033 // response to organic substance //                                                                                                                                                                                                                      |                                                                                                                                                                                                                                                                                                                                                                                                                                                                                                                                                               |                                                                                                                                                                                      |
| NM_001110146 | ///NM_021400    | 0.006529963   | 0.00204311    | 1.21          | 1.62   | 1.32                | <b>Prg4</b>                                                      | proteoglycan 4 (megakaryocyte stimulating factor, articular super                                                                                                                                                                                                                                                                                                                                       | 0006898 // receptor-mediated endocytosis // inferred from electronic annotation // 0006955 // immune response // inferred from electronic annotation // 00018149 // peptide crossr                                                                                                                                                                                                                                                                                                                                                                            |                                                                                                                                                                                      |
| NM_001267707 | ///NM_000151781 | 0.00058869    | 1.53          | 1.23          | 1.32   | <b>Slc10a5</b>      | slc25 carrier family 10 (anion transporter family, member 1a5    | 0006810 // transport // inferred from electronic annotation // 0006811 // ion transport // inferred from electronic annotation // 0008206 // bile acid metabolic process // not recorded                                                                                                                                                                                                                |                                                                                                                                                                                                                                                                                                                                                                                                                                                                                                                                                               |                                                                                                                                                                                      |
| NM_019553    |                 | 0.004509864   | 1.19          | 1.35          | 1.32   | <b>Ddx21</b>        | DEAD (Asp-Glu-Ala-Asp) box polypeptide 21                        | 0001649 // osteoblast differentiation // not recorded // 0006351 // transcription, DNA-templated // inferred from electronic annotation // 0006364 // rRNA processing // inferred fr                                                                                                                                                                                                                    |                                                                                                                                                                                                                                                                                                                                                                                                                                                                                                                                                               |                                                                                                                                                                                      |
| NM_001164336 | ///NM_001164337 | 0.00715914    | 1.09          | 1.19          | 1.31   | 1.3                 | <b>Mar</b>                                                       | membrane-associated ring finger (C3HC4) 5                                                                                                                                                                                                                                                                                                                                                               | 0000209 // protein polyubiquitination // not recorded // 0016567 // protein ubiquitination // inferred from electronic annotation // 0051865 // protein autoubiquitination // not recor                                                                                                                                                                                                                                                                                                                                                                       |                                                                                                                                                                                      |
| NM_017373    | ///NM_00        | 0.00101011    | 0.001408788   | 1.64          | 1.57   | 1.31                | <b>Nfj1b</b>                                                     | nuclear factor, interleukin 3, regulated                                                                                                                                                                                                                                                                                                                                                                | 0001022 // negative regulation of transcription from RNA polymerase II promoter // not recorded // 0006351 // transcription, DNA-templated // inferred from electronic annotation //                                                                                                                                                                                                                                                                                                                                                                          |                                                                                                                                                                                      |
| NM_001081214 | ///NM_1         | 3.1E-04       | 0.005732399   | 1.47          | 1.53   | 1.31                | <b>Ppargc1r</b>                                                  | peroxisome proliferative activated receptor, gamma, coactivator-r                                                                                                                                                                                                                                                                                                                                       | 0006351 // transcription, DNA-templated // inferred from electronic annotation // 0006355 // regulation of transcription, DNA-templated // inferred from electronic annotation // 000                                                                                                                                                                                                                                                                                                                                                                         |                                                                                                                                                                                      |
| NM_011112    | ///NM_006515592 | 0.006515593   | 0.00417569    | -1.09         | 1.00   | 1.31                | <b>Papola</b>                                                    | poly (A) polymerase alpha                                                                                                                                                                                                                                                                                                                                                                               | 0003998 // mRNA splicing, via spliceosome // -- // 0006369 // termination of RNA polymerase II transcription // -- // 0006378 // mRNA polyadenylation // not recorded // 0006397 //                                                                                                                                                                                                                                                                                                                                                                           |                                                                                                                                                                                      |
| NM_024495    |                 | 0.00437933    | 2.95E-04      | 1.19          | 1.34   | 1.31                | <b>Cor13</b>                                                     | coronin 13                                                                                                                                                                                                                                                                                                                                                                                              | 0006730 // one-carbon metabolic process // inferred from electronic annotation                                                                                                                                                                                                                                                                                                                                                                                                                                                                                |                                                                                                                                                                                      |
| NM_001005767 | ///XR_384575    | 0.002629318   | 0.00329907    | 1.09          | 1.25   | 1.31                | <b>Pari</b>                                                      | presenilin associated, rhomboid-like                                                                                                                                                                                                                                                                                                                                                                    | 0006508 // proteolysis // inferred from genetic interaction // 0006508 // proteolysis // inferred from mutant phenotype // 0006508 // proteolysis // not recorded // 0016485 // prot                                                                                                                                                                                                                                                                                                                                                                          |                                                                                                                                                                                      |
| NM_028355    | ///NM_006503423 | 0.006503423   | 0.00329907    | 1.09          | 1.13   | 1.31                | <b>Ndel1</b>                                                     | NDC1 transmembrane nucleoporin                                                                                                                                                                                                                                                                                                                                                                          | 0006810 // transport // inferred from electronic annotation // 0007125 // synapsis // inferred from mutant phenotype // 0007283 // spermatogenesis // inferred from mutant phenet                                                                                                                                                                                                                                                                                                                                                                             |                                                                                                                                                                                      |
| NM_133757    | ///NM_011249288 | 0.00385447    | 0.00139282    | 1.12          | 1.28   | 1.31                | <b>Pgs1</b>                                                      | phosphatidylglycerophosphate synthase 1                                                                                                                                                                                                                                                                                                                                                                 | 0006629 // lipid metabolic process // inferred from electronic annotation // 0006655 // phosphatidylglycerol biosynthetic process // inferred from sequence or structural similarity // 0001649 // osteoblast differentiation // inferred from electronic annotation                                                                                                                                                                                                                                                                                          |                                                                                                                                                                                      |
| NM_001001491 |                 | 0.00662347    | 1.05          | 1.06          | 1.31   | <b>Tpm4</b>         | tropomyosin 4                                                    | 0001924 // positive regulation of protein phosphorylation // not recorded // 0002792 // negative regulation of peptide secretion // not recorded // 0006955 // immune response // m                                                                                                                                                                                                                     |                                                                                                                                                                                                                                                                                                                                                                                                                                                                                                                                                               |                                                                                                                                                                                      |
| NM_001136079 | ///NM_001170816 | 0.001765052   | 1.42          | 1.42          | 1.31   | <b>Ptger4</b>       | prostaglandin H receptor 4 (subtype EP4)                         | 0002026 // pyrimidine nucleobase metabolic process // not recorded // 0006222 // UMP biosynthetic process // -- // 0006238 // CMP salvage // inferred from electronic annotation //                                                                                                                                                                                                                     |                                                                                                                                                                                                                                                                                                                                                                                                                                                                                                                                                               |                                                                                                                                                                                      |
| NM_030724    | ///NM_006497039 | 0.006497040   | 9.86E-04      | 1.05          | 1.13   | 1.31                | <b>Uck2</b>                                                      | uridine-cytidine kinase 2                                                                                                                                                                                                                                                                                                                                                                               | 0006508 // proteolysis // inferred from electronic annotation // 0006898 // receptor-mediated endocytosis // inferred from electronic annotation                                                                                                                                                                                                                                                                                                                                                                                                              |                                                                                                                                                                                      |
| NM_145403    |                 | 9.87E-04      | 1.22          | 1.37          | 1.31   | <b>Tmprss4</b>      | transmembrane protease, serine 4                                 | 0006810 // transport // inferred from electronic annotation // 0033762 // response to glucagon // not recorded // 00055114 // oxidation-reduction process // inferred from electronic                                                                                                                                                                                                                   |                                                                                                                                                                                                                                                                                                                                                                                                                                                                                                                                                               |                                                                                                                                                                                      |
| NM_025567    |                 | 0.007171161   | 1.00          | 1.26          | 1.31   | <b>Cyc1</b>         | cytochrome c-1                                                   |                                                                                                                                                                                                                                                                                                                                                                                                         |                                                                                                                                                                                                                                                                                                                                                                                                                                                                                                                                                               |                                                                                                                                                                                      |

| RefSeq                                   | Transcript ID             | p (24h n=460) | p (48h n=657) | p (72h n=805) | FC 24h | FC 48h                     | FC 72h                                                              | Gene Symbol                                                                                                                                                                                                       | Gene Title                                                                                                                                                                             | Gene Ontology Biological Process                                                                                                                                                          |
|------------------------------------------|---------------------------|---------------|---------------|---------------|--------|----------------------------|---------------------------------------------------------------------|-------------------------------------------------------------------------------------------------------------------------------------------------------------------------------------------------------------------|----------------------------------------------------------------------------------------------------------------------------------------------------------------------------------------|-------------------------------------------------------------------------------------------------------------------------------------------------------------------------------------------|
| NM_013594//XM_00                         | 0.00171644                |               |               |               | 1.31   | 1.18                       | 1.29                                                                | <b>Mbd1</b>                                                                                                                                                                                                       | methyl-CpG binding domain protein 1                                                                                                                                                    | 0000122 // negative regulation of transcription from RNA polymerase II promoter // not recorded//0006346 // methylation-dependent chromatin silencing // not recorded//0006346            |
| NM_001042513//NM                         | 6.29E-04                  | 0.008700395   | 0.00136108    |               | 1.27   | 1.42                       | 1.29                                                                | <b>Tnfr1</b>                                                                                                                                                                                                      | thioredoxin reductase 1                                                                                                                                                                | 0001707 // mesoderm formation // inferred from mutant phenotype//0006979 // response to oxidative stress // not recorded//0007369 // gastrulation // inferred from mutant phenotype       |
| NM_022325                                |                           | 0.00289558    | -1.02         | 1.22          | 1.22   | 1.29                       | <b>Ctsz</b>                                                         | cathepsin Z                                                                                                                                                                                                       | 0006508 // proteolysis // inferred from electronic annotation//00051603 // proteolysis involved in cellular protein catabolic process // not recorded//0006041 // epithelial tube bran |                                                                                                                                                                                           |
| NM_001204875//NM                         | 0.23871                   |               |               |               | 1.12   | 1.11                       | 1.29                                                                | <b>Set</b>                                                                                                                                                                                                        | SET nuclear oncogene                                                                                                                                                                   | 0006334 // nucleosome assembly // inferred from electronic annotation//00043524 // negative regulation of neuron apoptotic process // not recorded//0004892 // negative regulation        |
| NM_007825//XM_006535383//XM              | 1.68E-04                  |               |               |               | 1.21   | 1.36                       | 1.29                                                                | <b>Cyp7b1</b>                                                                                                                                                                                                     | cytochrome P450, family 7, subfamily B, polypeptide 1                                                                                                                                  | 0006629 // lipid metabolic process // inferred from electronic annotation//0006699 // bile acid biosynthetic process // inferred from direct assay//0007586 // digestion // traceable     |
| NM_027519//XM_00                         | 0.00355944                | 0.002369367   |               |               | 1.39   | 1.41                       | 1.29                                                                | <b>Meadg</b>                                                                                                                                                                                                      | mesenteric estrogen dependent adipogenesis                                                                                                                                             | 0045600 // positive regulation of fat cell differentiation // inferred from mutant phenotype                                                                                              |
| NM_029959                                |                           | 0.00584465    | 1.03          | 1.25          | 1.29   | <b>Pbp2</b>                | phosphatidylethanolamine binding protein 2                          | 0010033 // response to organic substance // inferred from electronic annotation//0010243 // response to organonitrogen compound // inferred from electronic annotation//00104                                     |                                                                                                                                                                                        |                                                                                                                                                                                           |
| NM_001013368//XM                         | 0.00654055//XM_00654055   | 0.00422818    | 1.10          | 1.19          | 1.29   | <b>E2f8</b>                | E2F transcription factor 8                                          | 0000122 // negative regulation of transcription from RNA polymerase II promoter // inferred from mutant phenotype//0000122 // negative regulation of transcription from RNA pol                                   |                                                                                                                                                                                        |                                                                                                                                                                                           |
| NM_010253                                |                           | 0.0032902     | 1.05          | 1.21          | 1.29   | <b>Gol</b>                 | galanin                                                             | 0006954 // inflammatory response // not recorded//0007238 // neuroepithelial signaling pathway // inferred from mutant phenotype//0007399 // nervous system development // in                                     |                                                                                                                                                                                        |                                                                                                                                                                                           |
| NM_001291348//NM                         | 0.001291349//             | 0.005597941   | 1.15          | 1.28          | 1.29   | <b>Anapc15</b>             | anaphase promoting complex C subunit 15                             | 0007049 // cell cycle // inferred from electronic annotation//0007067 // mitotic nuclear division // inferred from mutant phenotype//00051301 // cell division // inferred from ele                               |                                                                                                                                                                                        |                                                                                                                                                                                           |
| NM_001198933//NM                         | 0.00813009                |               | 0.00472388    | 1.15          | 1.33   | 1.29                       | <b>Me1</b>                                                          | male-specific enzyme 1, NADPH-dependent, cytosolic anti-silencing function 1B histone chaperone                                                                                                                   | 0006108 // malate metabolic process // not recorded//0006108 // malate metabolic process // inferred from sequence or structural similarity//0009725 // response to hormone //         |                                                                                                                                                                                           |
| NM_024184                                |                           | 0.008237724   | -1.06         | 1.22          | 1.29   | <b>Asf1b</b>               | forkhead box D1                                                     | 0006333 // chromatin assembly or disassembly // inferred from electronic annotation//0006334 // nucleosome assembly // inferred from direct assay//0006335 // DNA replication                                     |                                                                                                                                                                                        |                                                                                                                                                                                           |
| NM_006239                                |                           | 0.00535609    | 0.007140858   |               | 1.23   | 1.26                       | 1.29                                                                | <b>Foxq1</b>                                                                                                                                                                                                      | forkhead box O1                                                                                                                                                                        | 0006335 // transcription, DNA-templated // inferred from electronic annotation//0006335 // regulation of transcription, DNA-templated // inferred from electronic annotation//000         |
| NM_001033313                             |                           |               | 0.00138672    |               | 1.06   | 1.24                       | 1.29                                                                | <b>Pdcp1</b>                                                                                                                                                                                                      | PDGFA associated protein 1                                                                                                                                                             | 0048008 // platelet-derived growth factor receptor signaling pathway // not recorded                                                                                                      |
| NM_177638//XM_006524163//XM              | 0.06524164//              |               | 0.00333495    |               | 1.10   | 1.23                       | 1.28                                                                | <b>Cr3b</b>                                                                                                                                                                                                       | crumbs family member 3                                                                                                                                                                 | 0045198 // establishment of epithelial cell apical/basal polarity // not recorded//00045216 // cell-cell junction organization // not recorded//00072659 // protein localization to plasm |
| NM_133771//XM_006525109//XM              | 0.004369582               |               | 0.00518366    |               | 1.13   | 1.26                       | 1.28                                                                | <b>Memo1</b>                                                                                                                                                                                                      | mediator of cell motility 1                                                                                                                                                            | 0032886 // regulation of microtubule-based process // not recorded                                                                                                                        |
| NM_007991//XM_00                         | 0.00742847                |               | 0.00102621    |               | 1.17   | 1.23                       | 1.28                                                                | <b>Fbl//LOC102643269</b>                                                                                                                                                                                          | fibrillarin//rRNA 2'-O-methyltransferase fibrillarin                                                                                                                                   | 0000494 // box C/D snoRNA 3'-end processing // not recorded//0001649 // osteoblast differentiation // not recorded//0006364 // rRNA processing // inferred from electronic anno           |
| NM_024241//XR_878878//XR_878             | 0.002247344               |               | 1.05          | 1.28          | 1.28   | <b>Tomm20</b>              | translocase of outer mitochondrial membrane 20 homolog (yeast)      | 0006605 // protein targeting // inferred from electronic annotation//0006626 // protein targeting to mitochondrion // not recorded//0006810 // transport // inferred from electron                                |                                                                                                                                                                                        |                                                                                                                                                                                           |
| NM_007574                                |                           | 0.001288241   | -1.04         | 1.29          | 1.28   | <b>C1qc</b>                | complement component 1, q subcomponent, C chain                     | 0002376 // immune system process // inferred from electronic annotation//0006958 // complement activation, classical pathway // inferred from electronic annotation//00038053                                     |                                                                                                                                                                                        |                                                                                                                                                                                           |
| NM_008062//NM_01                         | 0.00653897                | 0.00191245    | 0.00917291    |               | 1.15   | 1.45                       | 1.28                                                                | <b>G6pd//G6pd2</b>                                                                                                                                                                                                | glucose-6-phosphate dehydrogenase X-linked//glucose-6-phospho                                                                                                                          | 0001816 // cytokine production // inferred from mutant phenotype//0001998 // angiotensin mediated vasoconstriction involved in regulation of systemic arterial blood pressure // u        |
| NM_001109684//NM                         | 0.00109685//NM_144531     | 0.00473739    | 1.21          | 1.29          | 1.28   | <b>Kzn</b>                 | kluzin, periplakin interacting protein                              | 0006124 // keratinization // inferred from electronic annotation                                                                                                                                                  |                                                                                                                                                                                        |                                                                                                                                                                                           |
| NM_001135151//NM                         | 8.03E-04                  | 7.54E-04      | 1.29          | 1.28          | 1.28   | <b>Slc39a14</b>            | solute carrier family 39 (zinc transporter), member 14              | 0006810 // transport // inferred from electronic annotation//0006811 // ion transport // inferred from electronic annotation//0006826 // iron ion transport // inferred from direct                               |                                                                                                                                                                                        |                                                                                                                                                                                           |
| NM_009112//XM_011251865                  | 0.003748216               |               | 1.01          | 1.30          | 1.28   | <b>S100A10</b>             | S100 calcium binding protein A10 (calpactin)//protein S100-A10-l    | 0001176 // membrane raft assembly // not recorded//0006900 // membrane budding // not recorded//0043547 // positive regulation of GTPase activity // not recorded//0005109                                        |                                                                                                                                                                                        |                                                                                                                                                                                           |
| NM_007838                                |                           | 0.00986295    | 1.01          | 1.06          | 1.28   | <b>Dost</b>                | dolichyl-di-phosphooligosaccharide-protein glycotransferase         | 0006486 // protein glycosylation // inferred from sequence or structural similarity//0006486 // protein glycosylation // inferred from electronic annotation//0006487 // protein N-li                             |                                                                                                                                                                                        |                                                                                                                                                                                           |
| NM_029639                                |                           | 3.60E-04      | 0.00107309    |               | 1.00   | 1.34                       | 1.28                                                                | <b>Plet1</b>                                                                                                                                                                                                      | platelet expressed transcript 1                                                                                                                                                        | 0001953 // negative regulation of cell-matrix adhesion // inferred from mutant phenotype//00030154 // cell differentiation // inferred from electronic annotation//0003035 // posit       |
| NM_029478//XM_00                         | 0.00115548                |               | 1.36          | 1.31          | 1.27   | <b>Vmp1</b>                | vacuole membrane protein 1                                          | 0006887 // exocytosis // not recorded//0006914 // autophagy // inferred from electronic annotation//0007029 // endoplasmic reticulum organization // not recorded//0007030                                        |                                                                                                                                                                                        |                                                                                                                                                                                           |
| NM_175451                                |                           | 0.0014105     | 1.06          | 1.15          | 1.27   | <b>Kcp4</b>                | cytoskeleton-associated protein 4                                   |                                                                                                                                                                                                                   |                                                                                                                                                                                        |                                                                                                                                                                                           |
| NM_008021//NM_027697                     |                           | 0.00156567    | 1.05          | 1.15          | 1.27   | <b>Foxm1//493341G19R1K</b> | forkhead box M1//RIKEN cDNA 493341G19I                              | 0000086 // G2/M transition of mitotic cell cycle // not recorded//0000122 // negative regulation of transcription from RNA polymerase II promoter // not recorded//0000302 // res                                 |                                                                                                                                                                                        |                                                                                                                                                                                           |
| NM_0113898                               |                           | 0.00472442    | 0.00271019    |               | 1.22   | 1.37                       | 1.27                                                                | <b>Timm8a1</b>                                                                                                                                                                                                    | translocase of inner mitochondrial membrane 8A1                                                                                                                                        | 0006626 // protein targeting to mitochondrion // not recorded//0006810 // transport // inferred from electronic annotation//0015031 // protein transport // inferred from electron        |
| NR_024067                                |                           | 0.003965239   | 1.05          | 1.37          | 1.27   | <b>Snhg6</b>               | small nuclear RNA host gene 6                                       |                                                                                                                                                                                                                   |                                                                                                                                                                                        |                                                                                                                                                                                           |
| NM_001159866//NM                         | 0.195622//XM_004944335    |               | 1.06          | 1.38          | 1.27   | <b>Uchl5</b>               | ubiquitin carboxyl-terminal esterase L5                             | 0006281 // DNA repair // inferred from electronic annotation//0006310 // DNA recombination // inferred from electronic annotation//0006351 // transcription, DNA-templated // i                                   |                                                                                                                                                                                        |                                                                                                                                                                                           |
| NM_023418                                |                           | 0.00500534    | 1.06          | 1.21          | 1.27   | <b>Pgam1</b>               | phosphoglycerate mutase 1                                           | 0006094 // gluconeogenesis // inferred from electronic annotation//0006094 // glycolytic process // not recorded//0006110 // regulation of glycolytic process // not recorded//0006740 // protein dephosphorylati |                                                                                                                                                                                        |                                                                                                                                                                                           |
| NM_011655                                |                           | 0.005062215   | -1.01         | 1.25          | 1.27   | <b>Tubb5</b>               | tubulin, beta 5 class I                                             | 0006457 // protein folding // --//0006096 // glycolytic process // not recorded//0006110 // microtubule-based process // inferred from direct assay//0007017 // microtubule-based process //                      |                                                                                                                                                                                        |                                                                                                                                                                                           |
| NM_001284328//NM                         | 0.01311113//              | 0.005298061   | 1.23          | 1.48          | 1.26   | <b>Syncrip</b>             | synaptotagmin binding, cytoplasmic RNA interacting protein          | 0001649 // osteoblast differentiation // not recorded//0006397 // mRNA processing // inferred from electronic annotation//0008380 // RNA splicing // inferred from electronic anno                                |                                                                                                                                                                                        |                                                                                                                                                                                           |
| NM_023044                                |                           | 4.80E-05      | 1.01          | 1.47          | 1.26   | <b>Slc15a3</b>             | solute carrier family 15, member 3                                  | 0006810 // transport // inferred from electronic annotation//0006857 // oligopeptide transport // inferred from electronic annotation//0015031 // protein transport // inferred from                              |                                                                                                                                                                                        |                                                                                                                                                                                           |
| NM_025380                                |                           | 0.00187606    | 1.50          | 1.44          | 1.26   | <b>Eef1e1</b>              | eukaryotic translation elongation factor 1 epsilon 1                | 0006281 // DNA repair // non-traceable author statement//0006412 // translation // inferred from electronic annotation//0006414 // translational elongation // not recorded//00                                   |                                                                                                                                                                                        |                                                                                                                                                                                           |
| NM_021456                                |                           | 1.89E-05      | 1.41          | 1.27          | 1.26   | <b>Clp1</b>                | carboxylesterase 1G                                                 | 0008152 // metabolic process // inferred from electronic annotation//0010468 // regulation of gene expression // inferred from mutant phenotype//0016042 // lipid catabolic pro                                   |                                                                                                                                                                                        |                                                                                                                                                                                           |
| NM_009191//XM_006507488//XM              | 0.006507489//             | 0.00354966    | 1.11          | 1.08          | 1.26   | <b>C1pb</b>                | C1pb caseinolytic peptidase B                                       | 0008152 // metabolic process // inferred from electronic annotation//0034605 // cellular response to heat // not recorded                                                                                         |                                                                                                                                                                                        |                                                                                                                                                                                           |
| NM_010902//NR_13                         | 0.00233944                |               | 1.30          | 1.28          | 1.26   | <b>Nfe2l2</b>              | nuclear factor, erythroid derived 2, like 2                         | 0006355 // transcription, DNA-templated // inferred from electronic annotation//0006355 // regulation of transcription, DNA-templated // inferred from direct assay//0006366 // t                                 |                                                                                                                                                                                        |                                                                                                                                                                                           |
| NM_008828                                |                           | 0.00827432    | 1.23          | 1.36          | 1.26   | <b>Pgk1</b>                | phosphoglycerate kinase 1                                           | 0005975 // carbohydrate metabolic process // not recorded//0006094 // gluconeogenesis // not recorded//0006096 // glycolytic process // inferred from direct assay//0006096 // t                                  |                                                                                                                                                                                        |                                                                                                                                                                                           |
| NM_001040682//NM                         | 0.53155//NR_104435//NR    | 0.00592363    | 1.07          | 1.12          | 1.26   | <b>Cmn</b>                 | calmin                                                              | 0008285 // negative regulation of cell proliferation // inferred from direct assay//0031175 // neuron projection development // inferred from mutant phenotype                                                    |                                                                                                                                                                                        |                                                                                                                                                                                           |
| NM_001291439//NM                         | 9.95E-04                  | 4.98E-04      | 1.28          | 1.87          | 1.26   | <b>Hmgcs1</b>              | 3-hydroxy-3-methylglutaryl-Coenzyme A synthase 1                    | 0001889 // liver development // inferred from electronic annotation//0006629 // lipid metabolic process // inferred from electronic annotation//0006694 // steroid biosynthesis pr                                |                                                                                                                                                                                        |                                                                                                                                                                                           |
| NM_007386                                |                           | 0.006665054   | 1.12          | 1.29          | 1.26   | <b>Aco1</b>                | aconitase 1                                                         | 0006099 // tricarboxylic acid cycle // inferred from electronic annotation//0006101 // citrate metabolic process // not recorded//0006417 // regulation of translation // inferred from                           |                                                                                                                                                                                        |                                                                                                                                                                                           |
| NM_007633                                |                           | 0.0034679     | 1.08          | 1.19          | 1.26   | <b>Ccne1</b>               | cyclin E1                                                           | 0000082 // G1/S transition of mitotic cell cycle // inferred from electronic annotation//0001547 // antral ovarian follicle growth // inferred from electronic annotation//0001889 //                             |                                                                                                                                                                                        |                                                                                                                                                                                           |
| NM_009569//XM_00                         | 0.00714783                |               | -1.21         | 1.06          | 1.26   | <b>Zfpml1</b>              | zinc finger protein, multitype 1                                    | 0000122 // negative regulation of transcription from RNA polymerase II promoter // inferred from direct assay//0000122 // negative regulation of transcription from RNA polymer                                   |                                                                                                                                                                                        |                                                                                                                                                                                           |
| NM_009773//XM_006498622                  |                           | 0.00485824    | -1.00         | 1.21          | 1.26   | <b>Bub1b</b>               | binding uninhibited by benzimidazoles 1 homolog, beta 5, cerevis    | 0004668 // protein phosphorylation // inferred from electronic annotation//0006915 // apoptotic process // inferred from electronic annotation//0007049 // cell cycle // inferred fr                              |                                                                                                                                                                                        |                                                                                                                                                                                           |
| NM_133225                                |                           | 0.00571514    | 1.01          | 1.04          | 1.26   | <b>Acd3b</b>               | acyl-Coenzyme A binding domain containing 3                         | 0006629 // lipid metabolic process // inferred from electronic annotation//0006694 // steroid biosynthetic process // inferred from electronic annotation//0006810 // transport // i                              |                                                                                                                                                                                        |                                                                                                                                                                                           |
| NM_001033293//XR_374072//XR_374073//XR_3 | 0.0014732                 |               | 1.04          | 1.19          | 1.26   | <b>Uup11</b>               | UDP-N-acetylglucosamine pyrophosphorylase 1-like 1                  | 0006048 // UDP-N-acetylglucosamine biosynthetic process // --//0008152 // metabolic process // inferred from electronic annotation                                                                                |                                                                                                                                                                                        |                                                                                                                                                                                           |
| NM_001242368//NM                         | 0.007972                  | 0.007001603   | 1.10          | 1.21          | 1.26   | <b>F10</b>                 | coagulation factor X                                                | 0006508 // proteolysis // inferred from electronic annotation//0007596 // blood coagulation // not recorded//0007599 // hemostasis // inferred from electronic annotation//0003                                   |                                                                                                                                                                                        |                                                                                                                                                                                           |
| NM_001252578//NM                         | 0.01252579//NM_028072//   | 0.00578571    | -1.08         | 1.17          | 1.25   | <b>Sulf2</b>               | sulfatase 2                                                         | 0001822 // kidney development // inferred from genetic interaction//0002063 // chondrocyte development // inferred from mutant phenotype//0003094 // glomerular filtration //                                     |                                                                                                                                                                                        |                                                                                                                                                                                           |
| NM_026862//XM_011250688//XM              | 6.07E-04                  |               | 1.20          | 1.35          | 1.25   | <b>Cd177</b>               | CD177 antigen                                                       |                                                                                                                                                                                                                   |                                                                                                                                                                                        |                                                                                                                                                                                           |
| NM_001313923//NM                         | 0.00142853                |               | 1.16          | 1.16          | 1.25   | <b>Actg1</b>               | actin, gamma, cytoplasmic 1                                         | 0001895 // retina homeostasis // inferred from electronic annotation//00045214 // sarcomere organization // inferred from direct assay//0051592 // response to calcium ion // infer                               |                                                                                                                                                                                        |                                                                                                                                                                                           |
| NM_007634//XM_006523554                  |                           | 0.00964926    | 1.02          | 1.08          | 1.25   | <b>Conf</b>                | cyclin F                                                            | 0000320 // re-entry into mitotic cell cycle // inferred from mutant phenotype//0001890 // placenta development // inferred from mutant phenotype//0007049 // cell cycle // infer                                  |                                                                                                                                                                                        |                                                                                                                                                                                           |
| NM_021274                                |                           | 0.0097251     | 1.06          | 1.06          | 1.25   | <b>Cxcl10</b>              | chemokine (C-X-C motif) ligand 10                                   | 0002690 // positive regulation of leukocyte chemotaxis // not recorded//0006935 // chemotaxis // not recorded//0006954 // inflammatory response // not recorded//0006955 //                                       |                                                                                                                                                                                        |                                                                                                                                                                                           |
| NM_001080129//NM                         | 0.001080130//NM_001080101 | 0.00962911    | -1.12         | 1.08          | 1.25   | <b>Tmpo</b>                | thymopoietin                                                        | 0006355 // regulation of transcription, DNA-templated // inferred from direct assay                                                                                                                               |                                                                                                                                                                                        |                                                                                                                                                                                           |
| NM_001165939//NM                         | 0.00789198                | 0.004358608   | 1.24          | 1.35          | 1.25   | <b>Tshb</b>                | thyroid stimulating hormone, beta subunit                           | 0033189 // response to vitamin A // inferred from electronic annotation//0043627 // response to estrogen // inferred from electronic annotation//0051592 // response to calcium i                                 |                                                                                                                                                                                        |                                                                                                                                                                                           |
| NM_026894//XM_006506552//XM              | 0.00584872                |               | 1.06          | 1.24          | 1.25   | <b>Tamm41</b>              | TAM41, nuclear organelle translocator assembly and maintenance pr   | 0006629 // lipid metabolic process // inferred from electronic annotation//0008654 // phospholipid biosynthetic process // inferred from electronic annotation//0016024 // CDP-di                                 |                                                                                                                                                                                        |                                                                                                                                                                                           |
| NM_026053//XM_011246581//XM              | 0.009550269               |               | 1.16          | 1.20          | 1.25   | <b>Gem16</b>               | gem, nuclear organelle associated protein 6                         | 0000245 // spliceosomal complex assembly // inferred from electronic annotation//0000387 // spliceosomal snRNP assembly // not recorded//0006397 // mRNA processing // infer                                      |                                                                                                                                                                                        |                                                                                                                                                                                           |
| NM_001306205//NM                         | 0.23556//XM_006530183//   | 0.00911818    | 1.06          | 1.14          | 1.25   | <b>Mvk</b>                 | mevalonate kinase                                                   | 0006629 // lipid metabolic process // inferred from electronic annotation//0006694 // steroid biosynthetic process // inferred from electronic annotation//0006695 // cholesterol b                               |                                                                                                                                                                                        |                                                                                                                                                                                           |
| NM_009791//XM_006529108                  | 0.006524405               |               | 1.03          | 1.25          | 1.25   | <b>Aspm</b>                | asp (abnormal spindle)-like, microcephaly associated (Prosophila)   | 0001764 // neuron migration // inferred from genetic interaction//0001764 // neuron migration // inferred from mutant phenotype//0002052 // positive regulation of neuroblast p                                   |                                                                                                                                                                                        |                                                                                                                                                                                           |
| NM_019980//XM_006522427//XR_005401038    |                           | 0.005401038   | 1.16          | 1.29          | 1.25   | <b>Litaf//Gm9861</b>       | LPS-induced TN factor//predicted gene 9861                          | 0001817 // regulation of cytokine production // inferred from mutant phenotype//0006351 // transcription, DNA-templated // inferred from electronic annotation//0006355 // reg                                    |                                                                                                                                                                                        |                                                                                                                                                                                           |
| NM_001290706//NM                         | 0.25452//NM_006466657     |               | 1.10          | 1.28          | 1.25   | <b>Tmem54</b>              | transmembrane protein 54                                            |                                                                                                                                                                                                                   |                                                                                                                                                                                        |                                                                                                                                                                                           |
| NM_001026213//NM_001286972//             | 0.005629477               |               | 1.07          | 1.10          | 1.25   | <b>Dnajc19//Dnajc19-ps</b> | Dnaj (Hsp40) homolog, subfamily C, member 19//Dnaj (Hsp40) h        | 00056810 // transport // inferred from electronic annotation//0007601 // visual perception // not recorded//0015031 // protein transport // inferred from electronic annotation//0                                |                                                                                                                                                                                        |                                                                                                                                                                                           |
| NM_011334//XR_378219                     |                           | 0.00897249    | 1.04          | 1.10          | 1.25   | <b>Igfbp3</b>              | integrin alpha 3                                                    | 0007155 // cell adhesion // inferred from electronic annotation//0007228 // integrin-mediated signaling pathway // inferred from electronic annotation//0034113 // heterotypic cel                                |                                                                                                                                                                                        |                                                                                                                                                                                           |
| NM_001042534//NM_001271395//             | 3.17E-05                  |               | -1.04         | 1.55          | 1.24   | <b>Capp</b>                | capping protein (actin filament), geloslin-like                     | 0003013 // cell projection assembly // inferred from direct assay//0051035 // barbed-end actin filament capping // inferred from electronic annotation//0051693 // actin filament c                               |                                                                                                                                                                                        |                                                                                                                                                                                           |
| NM_139149//XM_006507759//XM              | 0.006507760               |               | 1.14          | 1.25          | 1.24   | <b>Fus</b>                 | fused in sarcoma                                                    | 0012717 // cellular response to calcium ion // not recorded//1993506 // regulation of nucleic acid-templated transcription // inferred from electronic annotation                                                 |                                                                                                                                                                                        |                                                                                                                                                                                           |
| NM_172845                                |                           | 0.00498705    | 1.15          | 1.28          | 1.24   | <b>Adams4</b>              | a disintegrin-like and metalloprotease (reprolysin type) with throm | 0006508 // proteolysis // inferred from direct assay//0042742 // defense response to bacterium // inferred from genetic interaction                                                                               |                                                                                                                                                                                        |                                                                                                                                                                                           |
| NM_001311101//NM                         | 0.026467//XM_006511383    | 0.00202505    | 1.04          | 1.14          | 1.24   | <b>Rps27l</b>              | ribosomal protein S27-like                                          | 0000028 // ribosomal small subunit assembly // --//0006281 // DNA repair // not recorded//0006412 // translation // not recorded//0006919 // activation of cysteine-type endop                                    |                                                                                                                                                                                        |                                                                                                                                                                                           |
| NM_0013470                               |                           | 0.007438398   | 1.06          | 1.25          | 1.24   | <b>Anxa3</b>               | annexin A3                                                          | 0006909 // glycolysis // not recorded//0010595 // positive regulation of endothelial cell migration // not recorded//0021766 // hippocampus development // inferred from elect                                    |                                                                                                                                                                                        |                                                                                                                                                                                           |
| NM_025434                                |                           | 0.00607998    | 1.11          | 1.19          | 1.24   | <b>Mps28</b>               | mitochondrial ribosomal protein S28                                 |                                                                                                                                                                                                                   |                                                                                                                                                                                        |                                                                                                                                                                                           |
| NM_021526                                |                           | 0.00564625    | 1.08          | 1.19          | 1.24   | <b>Psmid14</b>             | proteasome (prosome, macropain) 26S subunit, non-ATPase, 14         | 0000724 // double-strand break repair via homologous recombination // not recorded//0006281 // DNA repair // inferred from electronic annotation//0006303 // double-strand br                                     |                                                                                                                                                                                        |                                                                                                                                                                                           |
| NM_153576                                |                           | 0.00900769    | 9.15E-04      |               | 1.29   | 1.40                       | 1.24                                                                | <b>Cxcl17</b>                                                                                                                                                                                                     | chemokine (C-X-C motif) ligand 17                                                                                                                                                      | 0001525 // angiogenesis // inferred from electronic annotation//0006935 // chemotaxis // inferred from electronic annotation//0007275 // multicellular organismal development, /          |
| NM_153570                                |                           | 0.00282539    | 1.12          | 1.22          | 1.24   | <b>Noc4l</b>               | nuclear core complex associated 4 homolog (S. cerevisiae)           | 0042254 // ribosome biogenesis // inferred from electronic annotation                                                                                                                                             |                                                                                                                                                                                        |                                                                                                                                                                                           |
| NM_001310595//NM                         | 0.01310596//NM_0111844//  | 0.00255683    | 1.09          | 1.12          | 1.24   | <b>Psmo3</b>               | proteasome (prosome, macropain) subunit, alpha type 3               | 0006508 // proteolysis // inferred from electronic annotation//0006511 // ubiquitin-dependent protein catabolic process // inferred from electronic annotation//0010499 // protea                                 |                                                                                                                                                                                        |                                                                                                                                                                                           |
| NM_001164671//NM                         | 0.00660579                |               | -1.45         | -1.02         | 1.24   | <b>Dnajp1</b> </           |                                                                     |                                                                                                                                                                                                                   |                                                                                                                                                                                        |                                                                                                                                                                                           |



| RefSeq       | Transcript ID  | p (24h n=460)  | p (48h n=657) | p (72h n=805) | FC 24h | FC 48h | FC 72h | Gene Symbol         | Gene Title                                                          | Gene Ontology Biological Process                                                                                                                                                             |
|--------------|----------------|----------------|---------------|---------------|--------|--------|--------|---------------------|---------------------------------------------------------------------|----------------------------------------------------------------------------------------------------------------------------------------------------------------------------------------------|
| NM_0027352   | /NM_027343     | /XNM_006500155 |               | 0.00214126    | 1.01   | 1.14   | 1.23   | <b>Gorsp2</b>       | golgi reassembly stacking protein 2                                 | 0006996 // organelle organization // not recorded // 0007030 // Golgi organization // not recorded                                                                                           |
| NM_001025561 | /NM_001025562  | /XNM_0197000   |               | 0.00438658    | 1.06   | 1.11   | 1.23   | <b>Pus1</b>         | pseudouridine synthase 1                                            | 0001522 // pseudouridine synthesis // inferred from electronic annotation // 0008033 // tRNA processing // inferred from electronic annotation // 0009451 // RNA modification // inf         |
| NM_0209397   | /NM_170598     |                | 0.006745453   |               | 1.19   | 1.47   | 1.23   | <b>Rbm12</b>        | RNA binding motif protein 12                                        | 0006351 // transcription, DNA-templated // inferred from electronic annotation // 0006355 // regulation of transcription, DNA-templated // inferred from electronic annotation // 000        |
| NM_0083606   | /XNM_006510024 | /XNM_00593709  |               |               | 1.08   | 1.27   | 1.18   | <b>I18L</b>         | interleukin 18                                                      | 0000165 // MAPK cascade // not recorded // 0001525 // angiogenesis // not recorded // 0001525 // angiogenesis // inferred from sequence or structural similarity // 0001666 // resp          |
| NM_1535477   | /NM_17         | 3.08E-04       | 0.004201335   |               | 1.40   | 1.31   | 1.23   | <b>Gn3i</b>         | guanine nucleotide binding protein-like 3 (nucleolar)               | 0008283 // cell proliferation // not recorded // 00042127 // regulation of cell proliferation // not recorded // 00042254 // ribosome biogenesis // not recorded // 1902895 // positive reg  |
| NM_023142    |                |                | 0.004574685   |               | 1.03   | 1.36   | 1.22   | <b>Arpc1b</b>       | actin related protein 2/3 complex, subunit 18                       | 0030833 // regulation of actin filament polymerization // inferred from electronic annotation // 0034314 // Arp2/3 complex-mediated actin nucleation // not recorded // 1902895              |
| NM_013562    |                | 4.82E-04       | 0.006719883   |               | 1.31   | 1.25   | 1.22   | <b>Irf1d1</b>       | interferon-related developmental regulator 1                        | 0007275 // multicellular organismal development // inferred from electronic annotation // 0014706 // striated muscle tissue development // inferred from mutant phenotype // 0030            |
| NM_001045863 | /NM_001045864  | /XNM_1385800   |               | 0.00221544    | 1.12   | 1.18   | 1.22   | <b>Nelfe</b>        | negative elongation factor complex member E, Rdbp                   | 0000122 // negative regulation of transcription from RNA polymerase II promoter // inferred from electronic annotation // 0006351 // transcription, DNA-templated // inferred from t         |
| NM_009112    | /XNM_011251865 |                | 0.002119359   |               | 1.00   | 1.31   | 1.22   | <b>LOC105242499</b> | protein S100-A10-like // S100 calcium binding protein A10 (calpain) | 0001765 // membrane raft assembly // not recorded // 0006900 // membrane budding // not recorded // 0043547 // positive regulation of GTPase activity // not recorded // 0005109             |
| NM_139002    | /XNM_011248202 | /XNM_011248203 |               | 0.00987496    | 1.04   | 1.07   | 1.22   | <b>Sds1</b>         | serine dehydratase-like                                             | 0005655 // L-serine catabolic process // not recorded // 0006567 // threonine catabolic process // not recorded                                                                              |
| NM_138584    | /XNM_006511222 |                | 0.008324645   |               | 1.03   | 1.19   | 1.22   | <b>Spg21</b>        | spastic paraplegia 21 homolog (human)                               |                                                                                                                                                                                              |
| NM_025798    | /XNM_006512823 | /XNM_000594041 |               | 0.00595956    | 1.00   | 1.23   | 1.22   | <b>Hint3</b>        | histidine triad nucleotide binding protein 3                        | 0008152 // metabolic process // inferred from electronic annotation                                                                                                                          |
| NM_001162946 | /NM_00282403   |                | 0.00282403    |               | 1.19   | 1.49   | 1.22   | <b>Poa</b>          | pyruvate carboxylase                                                | 0006090 // pyruvate metabolic process // not recorded // 0006094 // gluconeogenesis // not recorded // 0006107 // oxaloacetate metabolic process // not recorded // 0006629 // lip           |
| NM_026030    |                |                | 0.00327023    |               | 1.12   | 1.14   | 1.22   | <b>Ejfb2</b>        | eukaryotic translation initiation factor 2, subunit 2 (beta)        | 0001701 // in utero embryonic development // inferred from mutant phenotype // 0002176 // male germ cell proliferation // inferred from mutant phenotype // 0006412 // translati             |
| NM_026753    |                |                | 0.00519836    |               | 1.03   | 1.20   | 1.22   | <b>Fam96b</b>       | family with sequence similarity 96, member B                        | 0007059 // chromosome segregation // not recorded // 0016226 // iron-sulfur cluster assembly // not recorded                                                                                 |
| NM_009137    |                | 0.00115586     | 0.00277881    |               | 1.21   | 1.24   | 1.22   | <b>Ca22</b>         | chemokine (C-C motif) ligand 22                                     | 0002548 // monocyte chemotaxis // not recorded // 0006935 // chemotaxis // inferred from electronic annotation // 0006954 // inflammatory response // inferred from electronic annotation // |
| NM_001164567 | /NM_011700     | /XNM_009423475 |               | 0.00423675    | 1.17   | 1.25   | 1.22   | <b>Vill</b>         | villin-like                                                         | 0007101 // cytoskeleton organization // inferred from electronic annotation // 0051693 // actin filament capping // inferred from electronic annotation                                      |
| NM_028315    | /XNM_006519601 | /XNM_006519602 |               | 0.00812882    | 1.13   | 1.16   | 1.22   | <b>Dis3</b>         | DIS3 mitotic control homolog (S. cerevisiae)                        | 000364 // RNA processing // not recorded // 0006402 // mRNA catabolic process // not recorded // 0016075 // rRNA catabolic process // not recorded // 0043547 // positive regula             |
| NM_025301    |                | 0.008490994    | 0.00326601    |               | 1.05   | 1.28   | 1.22   | <b>Mrlp17</b>       | mitochondrial ribosomal protein L17                                 | 0000002 // mitochondrial genome maintenance // traceable author statement // 0006412 // translation // not recorded                                                                          |
| NM_001304719 | /NM_009725     | /XNM_008715484 |               | 0.008715484   | 1.03   | 1.27   | 1.22   | <b>Atp5f1</b>       | ATP synthase, H+ transporting, mitochondrial F0 complex, subunit    | 0006810 // transport // inferred from electronic annotation // 0006811 // ion transport // inferred from electronic annotation // 0015986 // ATP synthesis coupled proton transport //       |
| NM_007984    |                | 0.00769135     | 0.00282951    |               | 1.04   | 1.05   | 1.22   | <b>Fscn1</b>        | fascin homolog 1, actin bundling protein (Frogycentrotus purp       | 0007015 // actin filament organization // inferred from electronic annotation // 0007043 // cell-cell junction assembly // not recorded // 0010592 // positive regulation of lamellipod      |
| NM_033079    | /XNM_006505368 | /XNM_006505369 |               | 0.00282951    | 1.03   | 1.09   | 1.22   | <b>Miap</b>         | meiosis 1 associated protein                                        | 0006396 // RNA processing // non-traceable author statement // 0007283 // spermatogenesis // inferred from mutant phenotype // 0007292 // female gamete generation // infer                  |
| NM_001025388 | /NM_0231119    | /XNM_001249618 |               | 0.001249618   | 1.04   | 1.48   | 1.22   | <b>Eno1</b>         | enolase 1, alpha non-neuron/enolase 1B, retrotransposed             | 0001701 // in utero embryonic development // inferred from mutant phenotype // 0006096 // glycolytic process // inferred from sequence or structural similarity // 0005109 // posit          |
| NM_010235    |                | 0.007389488    |               |               | 1.16   | 1.24   | 1.22   | <b>Fosl1</b>        | fos-like antigen 1                                                  | 0001701 // in utero embryonic development // inferred from mutant phenotype // 0006355 // regulation of transcription, DNA-templated // inferred from electronic annotation // 00            |
| NM_026159    |                | 0.0086093      |               |               | 1.04   | 1.24   | 1.21   | <b>Retsat</b>       | retinol saturase (all trans retinol 13,14 reductase)                | 0042572 // retinol metabolic process // inferred from direct assay // 0055114 // oxidation-reduction process // inferred from direct assay                                                   |
| NM_011333    |                | 0.00835736     | 4.44E-04      |               | 1.20   | 1.36   | 1.21   | <b>Col2</b>         | chemokine (C-C motif) ligand 2                                      | 000166 // MAPK cascade // inferred from electronic annotation // 0001525 // angiogenesis // traceable author statement // 0001666 // response to hypoxia // inferred from electro            |
| NM_022654    | /XNM_006536218 | /XNM_006536219 |               | 0.00499119    | 1.08   | -1.01  | 1.21   | <b>Pid1</b>         | p53 induced death domain protein 1                                  | 0006915 // apoptotic process // inferred from electronic annotation // 0006919 // activation of cysteine-type endopeptidase activity involved in apoptotic process // inferred from ger      |
| NM_025595    |                | 0.001052343    | 0.00818493    |               | 1.13   | 1.32   | 1.21   | <b>Mrlp51</b>       | mitochondrial ribosomal protein L51                                 | 0006412 // translation // inferred from direct assay // 0032543 // mitochondrial translation // inferred from sequence or structural similarity                                              |
| NM_001310723 | /NM_001310725  | /XNM_0013107   |               | 0.00357863    | 1.05   | 1.12   | 1.21   | <b>Setd8</b>        | SET domain containing [lysine methyltransferase] 8                  | 0000122 // negative regulation of transcription from RNA polymerase II promoter // not recorded // 0006351 // transcription, DNA-templated // inferred from electronic annotation //         |
| NM_026129    |                | 0.009095989    | 0.00872861    |               | 1.08   | 1.19   | 1.21   | <b>Erp29</b>        | endoplasmic reticulum protein 29                                    | 0000187 // activation of MAPK activity // not recorded // 0001934 // positive regulation of protein phosphorylation // not recorded // 0006457 // protein folding // not recorded // 00      |
| NM_009338    | /NM_153151     |                | 0.004299975   |               | 1.14   | 1.26   | 1.21   | <b>Acs2</b>         | Acetyl-Coenzyme A acetyltransferase 2 // acetyl-Coenzyme A acety    | 0008152 // metabolic process // inferred from electronic annotation // 0045797 // positive regulation of intestinal cholesterol absorption // inferred from direct assay                     |
| NM_009253    | /XNM_00        | 0.00116102     | 3.71E-05      |               | 1.28   | 1.78   | 1.21   | <b>Serpin3a</b>     | serpin (or cysteine) peptidase inhibitor, clade A, member 3A        | 0010466 // negative regulation of peptidase activity // inferred from electronic annotation // 0010951 // negative regulation of endopeptidase activity // not recorded // 0034097 // r      |
| NM_001103618 | /NM_001310619  |                | 0.009811147   |               | 1.02   | 1.19   | 1.21   | <b>Ube2t</b>        | ubiquitin-conjugating enzyme E2K                                    | 0007165 // signal transduction // inferred from electronic annotation // 0007186 // G-protein coupled receptor signaling pathway // inferred from electronic annotation                      |
| NM_001172100 | /NM_001172101  |                | 3.73E-04      |               | 1.09   | 1.36   | 1.21   | <b>Rnh1</b>         | ribonuclease/angiogenin inhibitor 1                                 | 0043086 // negative regulation of catalytic activity // not recorded // 0045765 // regulation of angiogenesis // not recorded                                                                |
| NM_001038703 | /NM_030258     | /XNM_008231633 |               | 0.008231633   | 1.01   | 1.23   | 1.20   | <b>Gpr146</b>       | G-protein-coupled receptor 146                                      | 0007165 // signal transduction // inferred from electronic annotation // 0007186 // G-protein coupled receptor signaling pathway // inferred from electronic annotation                      |
| NM_016966    | /NR_033590     | /NR_076        | 0.006945512   |               | 1.01   | 1.23   | 1.20   | <b>Gm8096</b>       | 3-phosphoglycerate dehydrogenase pseudogene // 3-phosphoglyc        | 0006554 // glutamine metabolic process // inferred from mutant phenotype // 0006544 // glycine metabolic process // inferred from mutant phenotype // 0006563 // L-serine metab              |
| NM_009338    | /NM_15         | 0.00645456     | 4.86E-04      |               | 1.17   | 1.36   | 1.20   | <b>Acs2</b>         | Acetyl-Coenzyme A acetyltransferase 2 // acetyl-Coenzyme A acety    | 0008152 // metabolic process // inferred from electronic annotation // 0045797 // positive regulation of intestinal cholesterol absorption // inferred from direct assay                     |
| NM_001277256 | /NM_00650293   |                | 0.00650293    |               | 1.29   | 1.26   | 1.20   | <b>Spre1</b>        | sprout protein with EVH-1 domain 1, related sequence                | 0000188 // inactivation of MAPK activity // inferred from mutant phenotype // 0007275 // multicellular organismal development // inferred from electronic annotation // 0009966 //           |
| NM_053074    |                |                | 0.00948157    |               | 1.07   | 1.23   | 1.20   | <b>Mups2</b>        | nucleoporin 62                                                      | 0006351 // transcription, DNA-templated // not recorded // 0006606 // protein import into nucleus // not recorded // 0006810 // transport // inferred from electronic annotation // 00       |
| NM_133888    |                |                | 0.00918714    |               | 1.19   | 1.20   | 1.20   | <b>Smpd3b</b>       | sphingomyelin phosphodiesterase, acid-like 3B                       | 0006685 // sphingomyelin phospholipase // inferred from electronic annotation // 0008152 // metabolic process // inferred from electronic annotation                                         |
| NM_029271    |                | 0.003213113    |               |               | 1.08   | 1.24   | 1.20   | <b>Mpl22</b>        | mitochondrial ribosomal protein L22                                 | 0006412 // translation // not recorded                                                                                                                                                       |
| NM_011132    |                | 0.008494997    |               |               | 1.08   | 1.19   | 1.20   | <b>Pole</b>         | polymerase (DNA directed), epsilon                                  | 0000082 // G1/S transition of mitotic cell cycle // not recorded // 0007331 // DNA synthesis involved in DNA repair // not recorded // 0001701 // in utero embryonic development // u        |
| NM_001081274 | /NM_025801     | /XNM_006841025 |               | 0.00577521    | 1.10   | 1.38   | 1.20   | <b>Pgd</b>          | phosphogluconate dehydrogenase                                      | 0005975 // carbohydrate metabolic process // not recorded // 0006098 // pentose-phosphate shunt // not recorded // 0006739 // NADP metabolic process // not recorded // 000905               |
| NM_0113899   |                | 0.0028944      | 0.002443797   |               | 1.29   | 1.29   | 1.19   | <b>Timm10</b>       | translocase of inner mitochondrial membrane 10                      | 0006810 // transport // inferred from electronic annotation // 0015031 // protein transport // inferred from electronic annotation // 0045039 // protein import into mitochondrial in        |
| NM_001253751 | /NM_001253752  |                | 0.002388096   |               | 1.29   | 1.45   | 1.19   | <b>Fdps</b>         | farnesyl diphosphate synthetase                                     | 0006629 // lipid metabolic process // inferred from electronic annotation // 0006694 // steroid biosynthetic process // inferred from electronic annotation // 0006695 // cholesterol b      |
| NM_008160    |                | 3.52E-04       | 0.005537277   |               | 1.06   | 1.42   | 1.19   | <b>Gpx1</b>         | glutathione peroxidase 1                                            | 0000302 // response to reactive oxygen species // inferred from mutant phenotype // 0001659 // temperature homeostasis // inferred from genetic interaction // 0001885 // endothe            |
| NM_026033    |                | 0.00872779     |               |               | -1.08  | 1.05   | 1.19   | <b>Gatad1</b>       | GATA zinc finger domain containing 1                                | 0006355 // regulation of transcription, DNA-templated // inferred from electronic annotation                                                                                                 |
| NM_001083904 | /NM_00080166   | 0.003050153    |               |               | 1.17   | 1.27   | 1.19   | <b>Fetub</b>        | fetuin beta                                                         | 0007338 // single fertilization // inferred from mutant phenotype // 0007339 // binding of sperm to zona pellucida // inferred from mutant phenotype // 0010466 // negative regulati         |
| NM_009076    | /XR_880074     |                | 0.00623787    |               | -1.01  | 1.15   | 1.19   | <b>LOC102635048</b> | 60S ribosomal protein L12 pseudogene // ribosomal protein L12       | 0000062 // ribosomal large subunit assembly // not recorded // 0006412 // translation // inferred from electronic annotation                                                                 |
| NM_001039701 | /NM_001159562  |                | 0.001424126   |               | 1.03   | 1.30   | 1.19   | <b>Illr1</b>        | interleukin 1 receptor antagonist                                   | 0001660 // fever generation // not recorded // 0001960 // negative regulation of cytokine-mediated signaling pathway // not recorded // 0002437 // inflammatory response to antige           |
| NM_001159421 | /NM_001159422  |                | 0.001059736   |               | 1.11   | 1.25   | 1.19   | <b>Ccdc58</b>       | coiled-coil domain containing 58                                    |                                                                                                                                                                                              |
| NM_001289591 | /NM_1307       |                | 3.07E-04      |               | 1.30   | 1.25   | 1.19   | <b>Tmem173</b>      | transmembrane protein 173                                           | 0002218 // activation of innate immune response // inferred from mutant phenotype // 0002218 // activation of innate immune response // not recorded // 0002230 // positive regul            |
| NM_133653    | /XNM_00        | 1.59E-04       |               |               | 1.30   | 1.19   | 1.19   | <b>Mat1a</b>        | methionine adenosyltransferase I, alpha                             | 0006556 // S-adenosylmethionine biosynthetic process // not recorded // 0006730 // one-carbon metabolic process // inferred from electronic annotation // 0051260 // protein hom             |
| NM_001290810 | /NM_023536     | /XNM_006539162 |               | 0.00914696    | 1.14   | 1.12   | 1.19   | <b>Mrt4</b>         | mRNA turnover 4, homolog (S. cerevisiae)                            | 0042254 // ribosome biogenesis // inferred from electronic annotation                                                                                                                        |
| NM_009533    | /XNM_00        | 0.00776811     |               |               | 1.21   | 1.21   | 1.19   | <b>Xrcc5</b>        | X-ray repair complementing defective repair in Chinese hamster ce   | 0000237 // leptotene // inferred from mutant phenotype // 0000723 // telomere maintenance // not recorded // 0006281 // DNA repair // inferred from electronic annotation // 0000            |
| NM_011113    | /XNM_00        | 4.64E-04       |               | 0.00585921    | 1.24   | 1.60   | 1.19   | <b>Plour</b>        | plasminogen activator, urokinase receptor                           | 0001934 // positive regulation of protein phosphorylation // not recorded // 0010628 // positive regulation of gene expression // not recorded // 0016310 // phosphorylation // inferr       |
| NM_001111058 | /NM_0012293    | /XNM_006540590 |               | 0.00515563    | 1.03   | 1.13   | 1.19   | <b>Cd33</b>         | CD33 antigen                                                        | 0007155 // cell adhesion // inferred from electronic annotation                                                                                                                              |
| NM_00111099  | /NM_1307       |                | 3.52E-04      |               | 1.46   | 1.18   | 1.18   | <b>Cdkn1a</b>       | cyclin-dependent kinase inhibitor 1A (P21)                          | 0000079 // regulation of cyclin-dependent protein serine/threonine kinase activity // inferred from mutant phenotype // 0000082 // G1/S transition of mitotic cell cycle // not recorde      |
| NM_026578    | /XNM_01        | 0.00860914     |               |               | 1.16   | 1.13   | 1.18   | <b>Gor1</b>         | GAR1 ribonucleoprotein homolog (yeast)                              | 0001522 // pseudouridine synthesis // inferred from electronic annotation // 0006364 // rRNA processing // inferred from electronic annotation // 0042254 // ribosome biogenesis // i        |
| NM_007422    | /XNM_00649623  |                | 0.00722469    |               | 1.11   | 1.23   | 1.18   | <b>Adss</b>         | adenylosuccinate synthetase, non-yeast                              | 0006164 // purine nucleotide biosynthetic process // inferred from direct assay // 0006167 // AMP biosynthetic process // inferred from direct assay // 0006167 // AMP biosynthetic p        |
| NM_001172146 | /NM_00967711   |                | 0.00967711    |               | 1.14   | 1.29   | 1.18   | <b>Aimp2</b>        | aminoacyl tRNA synthetase complex-interacting multifunctional pr    | 0006412 // translation // inferred from electronic annotation // 0006915 // apoptotic process // inferred from electronic annotation // 0007275 // multicellular organismal developm         |
| NM_025878    | /XNM_00        | 0.00136003     | 0.00710923    |               | 1.24   | 1.23   | 1.18   | <b>Mrlp518b</b>     | mitochondrial ribosomal protein S18B                                | 0006412 // translation // inferred from electronic annotation // 0032543 // mitochondrial translation // inferred from sequence or structural similarity                                     |
| NM_001166672 | /NM_632E-04    |                | 0.00710923    |               | -1.30  | -1.07  | 1.18   | <b>Gm10693</b>      | predicted pseudogene 10693 // predicted gene 14548 // leukocyte     | 0001782 // B cell homeostasis // inferred from mutant phenotype // 0002250 // adaptive immune response // inferred from electronic annotation // 0002376 // immune system proc               |
| NM_011339    | /XNM_01        | 0.00829025     |               |               | 1.24   | 1.18   | 1.18   | <b>Ca22</b>         | chemokine (C-C motif) ligand 12 // IC-C motif chemokine 12          | 0000165 // MAPK cascade // not recorded // 0001525 // angiogenesis // inferred from direct assay // 0002548 // monocyte chemotaxis // inferred from direct assay // 0002548 // m             |
| NM_009174    |                | 0.002681195    | 0.006479654   |               | 1.28   | 1.28   | 1.18   | <b>Slh2</b>         | seven in absentia 2                                                 | 0006511 // ubiquitin-dependent protein catabolic process // inferred from electronic annotation // 0006915 // apoptotic process // not recorded // 0007049 // cell cycle // inferre          |
| NM_008465    | /XNM_006527855 | /XNM_008590994 |               | 0.008590994   | 1.03   | 1.19   | 1.18   | <b>Kif4</b>         | kinesin family member 4                                             | 0000281 // mitotic cytokinesis // not recorded // 0007018 // microtubule-based movement // not recorded // 0008152 // metabolic process // inferred from electronic annotation //            |
| NM_027198    |                | 0.009409183    |               |               | 1.11   | 1.19   | 1.18   | <b>Zswim7</b>       | zinc finger SWIM-type containing 7                                  | 0007074 // double-strand break repair via homologous recombination // not recorded // 0006281 // DNA repair // inferred from electronic annotation // 0006310 // DNA recombina               |
| NM_023058    | /XNM_006524310 | /XNM_006524311 |               | 0.00785748    | -1.01  | 1.05   | 1.18   | <b>Pkmyt1</b>       | protein kinase, membrane associated tyrosine/threonine 1            | 0004668 // protein phosphorylation // inferred from electronic annotation // 0007049 // cell cycle // inferred from electronic annotation // 0010923 // negative regulation of phosph        |
| NM_178614    |                | 0.00855916     |               |               | 1.06   | 1.30   | 1.18   | <b>Samn50</b>       | sorting and assembly machinery component 50 homolog (S. cerevi      | 0031038 // mitochondrial respiratory chain complex assembly // not recorded // 0004207 // cristae formation // not recorded // 0045040 // protein import into mitochondrial or               |
| NM_001253883 | /NM_011099     | /XNM_001558087 |               | 0.001558087</ |        |        |        |                     |                                                                     |                                                                                                                                                                                              |



| RefSeq                                   | Transcript ID | p (24h n=460) | p (48h n=657) | p (72h n=805) | FC 24h | FC 48h | FC 72h | Gene Symbol                         | Gene Title                                                            | Gene Ontology Biological Process                                                                                                                                                           |
|------------------------------------------|---------------|---------------|---------------|---------------|--------|--------|--------|-------------------------------------|-----------------------------------------------------------------------|--------------------------------------------------------------------------------------------------------------------------------------------------------------------------------------------|
| NM_001163290//NM_023341//XM_008151176    |               |               |               |               | -1.04  | -1.19  | 1.01   | <b>Adck3</b>                        | aarF domain containing kinase 3                                       | 0006744 // ubiquinone biosynthetic process // not recorded//0016310 // phosphorylation // not recorded                                                                                     |
| NM_009008                                |               |               |               |               | -1.32  | 1.06   | -1.01  | <b>Rac2</b>                         | RAS-related C3 botulinum substrate 2                                  | 0006935 // chemotaxis // inferred from direct assay//0007015 // actin filament organization // not recorded//0007186 // G-protein coupled receptor signaling pathway // inferred f         |
| NM_016974//XM_00_1.81E-04                |               |               |               |               | -1.94  | -1.29  | -1.02  | <b>Ddbp</b>                         | D site albumin promoter binding protein                               | 0011889 // liver development // inferred from electronic annotation//0006351 // transcription, DNA-templated // inferred from electronic annotation//0006355 // regulation of tra          |
| NM_013559//XM_0065049191//XM_0004626031  |               |               |               |               | 1.03   | -1.90  | -1.02  | <b>Hsp1h</b>                        | heat shock 105kDa/110kDa protein 1                                    | 0006986 // response to unfolded protein // traceable author statement//0043524 // negative regulation of neuron apoptotic process // traceable author statement//0045345 // po             |
| NM_013560                                |               |               |               |               | -1.54  | -1.96  | -1.05  | <b>Hspb1</b>                        | heat shock protein 1                                                  | 0011895 // retina homeostasis // inferred from electronic annotation//0006469 // negative regulation of protein kinase activity // inferred from direct assay//0006986 // response t       |
| NM_145459                                | 3.63E-04      |               |               |               | -1.32  | -1.04  | -1.05  | <b>Zfp503</b>                       | zinc finger protein 503                                               | 0006351 // transcription, DNA-templated // inferred from electronic annotation//0006355 // negative regulation of transcription, DNA-templated // inferred from electronic annotation//000 |
| NM_029809                                |               |               |               |               | -1.05  | -1.21  | -1.05  | <b>Rnf225</b>                       | ring finger protein 225                                               | 0051973 // positive regulation of telomerase activity // not recorded                                                                                                                      |
| NM_145562                                |               |               |               |               | 1.02   | -1.20  | -1.05  | <b>Parm1</b>                        | prostate androgen-regulated mucin-like protein 1                      | 0002227 // innate immune response in mucosa // not recorded//0006334 // nucleosome assembly // not recorded//0019731 // antibacterial humoral response // not recorded//0                  |
| NM_001097979//NM_000617165               |               |               |               |               | -1.44  | -1.48  | -1.06  | <b>Hist1h2bc//Hist1h2be//Hist1h</b> | histone cluster 1, H2bc/histone cluster 1, H2be//histone cluster      | 0006351 // transcription, DNA-templated // inferred from electronic annotation//0006355 // regulation of transcription, DNA-templated // inferred from electronic annotation//000          |
| NM_001302338//NM_000452163               |               |               |               |               | -1.17  | -1.11  | -1.06  | <b>Nfe2l3</b>                       | nucleic factor, erythroid derived 2                                   | 0007155 // cell adhesion // inferred from electronic annotation//0019221 // cytokine-mediated signaling pathway // inferred from electronic annotation//0030593 // neutrophil ch           |
| NM_001252651//NM_9.84E-04                |               |               |               |               | -1.25  | -1.13  | -1.06  | <b>Csf3r</b>                        | colony stimulating factor 3 receptor (granulocyte)                    | 0002329 // pre-B cell differentiation // inferred from mutant phenotype//0006810 // transport // inferred from electronic annotation//0006811 // ion transport // inferred from ele        |
| NM_177725                                | 0.00192245    |               |               |               | -1.15  | -1.13  | -1.06  | <b>ErbB2</b>                        | leucine rich repeat containing 2                                      | 0001889 // liver development // inferred from electronic annotation//0001934 // positive regulation of protein phosphorylation // inferred from mutant phenotype//0006351 // tra           |
| NM_001003817                             | 0.00473034    |               |               |               | -1.21  | -1.18  | -1.07  | <b>Igf1</b>                         | immunoglobulin kappa chain complex                                    | 0006898 // receptor-mediated endocytosis // --//0006910 // phagocytosis, recognition // --//0006911 // phagocytosis, engulfment // --//0006958 // complement activation, clas              |
| NM_026065//XM_006516946                  |               |               |               |               | 1.04   | -1.28  | -1.07  | <b>Cap2</b>                         | CAP, adenylate cyclase-associated protein, 2 (yeast)                  | 0009092 // cell morphogenesis // inferred from electronic annotation//0007010 // cytoskeleton organization // inferred from electronic annotation                                          |
| NM_009621                                | 0.00628537    |               |               |               | 1.34   | -1.03  | -1.07  | <b>Adamts1</b>                      | a disintegrin-like and metalloproteinase (reprolysin type) with throm | 0001542 // ovulation from ovarian follicle // inferred from mutant phenotype//0001822 // kidney development // inferred from mutant phenotype//0006508 // proteolysis // infer             |
| NM_008610//NM_006530751                  |               |               |               |               | -1.11  | -1.27  | -1.08  | <b>Mmp2</b>                         | matrix metalloproteinase 2                                            | 0001525 // angiogenesis // inferred from electronic annotation//0001542 // ovarian follicle development // not recorded//0001666 // response to hypoxia // inferred from direct a          |
| NM_001160215//NM_000949219               |               |               |               |               | -1.14  | -1.18  | -1.08  | <b>Fcrla</b>                        | Fc receptor-like A                                                    | 0003154 // cell differentiation // inferred from electronic annotation                                                                                                                     |
| NM_031172//NM_17_000359042               |               |               |               |               | -1.25  | -1.07  | -1.08  | <b>Hist3h2a//Trim17</b>             | histone cluster 3, H2a//tripeptide motif-containing 17                | 0006325 // chromatin organization // not recorded//0006337 // nucleosome disassembly // not recorded//0006342 // chromatin silencing // not recorded//0006914 // autophagy                 |
| NM_025828                                |               |               |               |               | -1.13  | -1.22  | -1.08  | <b>Lman2</b>                        | lectin, mannose-binding 2                                             | 0006810 // transport // inferred from electronic annotation//0006890 // retrograde vesicle-mediated transport, Golgi to ER // not recorded//0015031 // protein transport // infer          |
| NM_054094//XM_00_000566332               |               |               |               |               | 1.28   | -1.02  | -1.08  | <b>AcsM1</b>                        | acyl-CoA synthetase medium-chain family member 1                      | 0006629 // lipid metabolic process // inferred from electronic annotation//0006631 // fatty acid metabolic process // inferred from electronic annotation//0006633 // fatty acid bio       |
| NM_008584                                | 0.00111336    |               |               |               | -1.28  | -1.19  | -1.09  | <b>Meox2</b>                        | mesenchyme homeobox 2                                                 | 0001525 // angiogenesis // inferred from mutant phenotype//0001757 // somitite specification // inferred from genetic interaction//0006351 // transcription, DNA-templated // infer        |
| NM_001316360//NM_6.01E-04                |               |               |               |               | -1.31  | 1.02   | -1.09  | <b>Bmp4</b>                         | bone morphogenetic protein 4                                          | 0001022 // negative regulation of transcription from RNA polymerase II promoter // inferred from direct assay//0000122 // negative regulation of transcription from RNA polymer            |
| NM_001013392//NM_000130643               |               |               |               |               | -1.20  | -1.11  | -1.09  | <b>Rreb1</b>                        | RAS responsive element binding protein 1                              | 0001022 // negative regulation of transcription from RNA polymerase II promoter // inferred from mutant phenotype//0001022 // negative regulation of transcription from RNA pol            |
| NM_001005846//NM_0004561                 |               |               |               |               | -1.23  | -1.15  | -1.09  | <b>Mcoln2</b>                       | mucoilin 2                                                            | 0006810 // transport // inferred from electronic annotation//0006811 // ion transport // inferred from electronic annotation                                                               |
| NM_001111043//NM_001111044//4.20E-04     |               |               |               |               | -1.24  | -1.65  | -1.09  | <b>Serpinh1</b>                     | serine (or cysteine) peptidase inhibitor, clade H, member 1           | 0003433 // chondrocyte development involved in endochondral bone morphogenesis // inferred from mutant phenotype//0010951 // negative regulation of endopeptidase activity ,               |
| NM_008788//XM_006504558                  |               |               |               |               | -1.07  | -1.28  | -1.10  | <b>Poace</b>                        | procollagen C-endopeptidase enhancer protein                          | 0006508 // proteolysis // inferred from direct assay//0010952 // positive regulation of peptidase activity // not recorded                                                                 |
| NM_019564                                | 0.001425422   |               |               |               | -1.19  | -1.30  | -1.10  | <b>Htra1</b>                        | HtrA serine peptidase 1                                               | 0011558 // regulation of cell growth // inferred from electronic annotation//0001890 // placenta development // inferred from mutant phenotype//0006508 // proteolysis // inferri          |
| NM_010882                                | 0.009879425   |               |               |               | -1.04  | -1.27  | -1.10  | <b>Ndn</b>                          | necladin                                                              | 0001764 // neuron migration // inferred from mutant phenotype//0003016 // respiratory system process // inferred from mutant phenotype//0006351 // transcription, DNA-templ                |
| NM_028044                                | 0.005925631   |               |               |               | -1.01  | -1.21  | -1.10  | <b>Cnn3</b>                         | calponin 3, acidic                                                    | 0003855 // epithelial cell differentiation // inferred from electronic annotation//0031032 // actomyosin structure organization // inferred from electronic annotation//0032780 // n       |
| NM_015786                                | 3.87E-04      |               |               |               | -1.38  | -1.08  | -1.10  | <b>Hist1h1c</b>                     | histone cluster 1, H1c                                                | 0000122 // negative regulation of transcription from RNA polymerase II promoter // inferred from genetic interaction//0006334 // nucleosome assembly // inferred from electronic ;         |
| NM_007464//XM_00_000106683               |               |               |               |               | 1.25   | 1.05   | -1.11  | <b>Birc3</b>                        | baculoviral IAP repeat-containing 3                                   | 0006915 // apoptotic process // inferred from electronic annotation//0016567 // protein ubiquitination // not recorded//0003198 // positive regulation of protein ubiquitination//000      |
| NM_022319//XM_006511334                  |               |               |               |               | -1.05  | -1.19  | -1.11  | <b>Cstn2</b>                        | calsyn2                                                               | 0011575 // cell adhesion // inferred from electronic annotation//0007156 // homophilic cell adhesion via plasma membrane adhesion molecules // inferred from electronic annotati           |
| NM_009789                                | 0.009267952   |               |               |               | -1.07  | -1.26  | -1.11  | <b>S100g</b>                        | S100 calcium binding protein G                                        | 0000187 // activation of MAPK activity // inferred from direct assay//0007165 // signal transduction // inferred from electronic annotation//0007186 // G-protein coupled receptor         |
| NM_001290486//NM_010336//NM_003096117    |               |               |               |               | 1.03   | -1.22  | -1.11  | <b>Lpar1</b>                        | lysophosphatidic acid receptor 1                                      | 0002836 // glomerular basement membrane development // inferred from mutant phenotype//0032836 // glomerular basement membrane development // not recorded                                 |
| NM_007735//NM_01_000484402               |               |               |               |               | -1.24  | -1.27  | -1.11  | <b>Col4a4</b>                       | collagen, type IV, alpha 4                                            | 0006839 // mitochondrial transport // not recorded//0035865 // cellular response to potassium ion // not recorded//0043653 // mitochondrial fragmentation involved in apoptotic            |
| NM_008730                                | 0.003843463   |               |               |               | -1.13  | -1.25  | -1.11  | <b>Nptx1</b>                        | neuronal pentraxin 1                                                  | 0000122 // negative regulation of transcription from RNA polymerase II promoter // inferred from direct assay//0006351 // transcription, DNA-templated // inferred from electronic         |
| NM_001008542//NM_8.43E-05                |               |               |               |               | -1.20  | -1.03  | -1.11  | <b>Mx1</b>                          | MAX interactor 1, dimerization protein                                | 0001606 // immunoglobulin mediated immune response // inferred from mutant phenotype//0016446 // somatic hypermutation of immunoglobulin genes // inferred from mutant c                   |
| NM_010104                                | 0.008150942   |               |               |               | -1.12  | -1.43  | -1.12  | <b>Edn1</b>                         | endothelin 1                                                          | 0000122 // negative regulation of transcription from RNA polymerase II promoter // not recorded//0011501 // skeletal system development // inferred from mutant phenotype//000             |
| NM_020581                                | 0.00779299    |               |               |               | 1.29   | 1.02   | -1.12  | <b>Angrp14</b>                      | angiotensin-like 4                                                    | 0001525 // angiogenesis // inferred from electronic annotation//0001666 // response to hypoxia // inferred from electronic annotation//0003267 // cellular response to starvation,         |
| NM_053195//XM_006500452                  |               |               |               |               | -1.05  | -1.18  | -1.12  | <b>Slc24a3</b>                      | solute carrier family 24 (sodium/potassium/calcium exchanger), m      | 0001189 // liver development // inferred from electronic annotation//0006811 // ion transport // inferred from electronic annotation//0006812 // cation transport // not recorded//00068   |
| NM_020495//NM_178235//NM_0C_000757671    |               |               |               |               | -1.09  | -1.19  | -1.12  | <b>Slc1b2</b>                       | solute carrier organic anion transporter family, member 1b2           | 0001889 // liver development // inferred from electronic annotation//0006810 // transport // inferred from electronic annotation//0006811 // ion transport // inferred from electr         |
| NM_008626//XM_006532406                  |               |               |               |               | -1.08  | -1.37  | -1.12  | <b>Mrc2</b>                         | mannose receptor, C type 2                                            | 0001649 // osteoblast differentiation // not recorded//0006897 // endocytosis // inferred from electronic annotation//0003074 // collagen catabolic process // not recorded                |
| NM_001285812//NM_000613731               |               |               |               |               | -1.16  | -1.08  | -1.13  | <b>Tmem53</b>                       | transmembrane protein 53                                              | 0000122 // negative regulation of transcription from RNA polymerase II promoter // not recorded//0005978 // glycogen biosynthetic process // inferred from mutant phenotype//0             |
| NM_145434                                | 2.70E-05      |               |               |               | -1.80  | -1.38  | -1.13  | <b>Nr1d1</b>                        | nuclear receptor subfamily 1, group D, member 1                       | 0043086 // negative regulation of catalytic activity // inferred from electronic annotation                                                                                                |
| NM_013712//XM_011247596//XM_000813078    |               |               |               |               | -1.05  | -1.21  | -1.13  | <b>Itg1b1p2</b>                     | integrin beta 1 binding protein 2                                     | 0000724 // double-strand break repair via homologous recombination // inferred from sequence or structural similarity//0000737 // DNA catabolic process, endonucleolytic // not r          |
| NM_00103257//NM_001195065//NM_00819721   |               |               |               |               | 1.00   | -1.25  | -1.13  | <b>Phactr2</b>                      | phosphatase and actin regulator 2                                     | 0006613 // cotranslational protein targeting to membrane // inferred from direct assay                                                                                                     |
| NM_015792//XM_006497505//XM_0007663231   |               |               |               |               | -1.12  | -1.18  | -1.13  | <b>Fbxo18</b>                       | F-box protein 18                                                      | 0016055 // Wnt signaling pathway // inferred from electronic annotation//0016567 // protein ubiquitination // not recorded//0003178 // negative regulation of Wnt signaling path           |
| NM_019419                                | 0.0097243     |               |               |               | -1.16  | -1.21  | -1.13  | <b>Ar1p61</b>                       | ADP-ribosylation factor-like 6 interacting protein 1                  | 0010977 // negative regulation of neuron projection development // inferred from genetic interaction//0014043 // negative regulation of neuron maturation // inferred from genetic         |
| NM_172448//XM_00_000818185               |               |               |               |               | -1.21  | -1.11  | -1.13  | <b>Rnf43</b>                        | ring finger protein 43                                                |                                                                                                                                                                                            |
| NR_028264                                | 0.002430072   |               |               |               | -1.21  | -1.33  | -1.13  | <b>Dreu2</b>                        | deleted in lymphocytic leukemia, 2                                    |                                                                                                                                                                                            |
| NM_027416                                | 0.00471647    |               |               |               | 1.17   | -1.03  | -1.13  | <b>Calm13</b>                       | calmodulin-like 3                                                     |                                                                                                                                                                                            |
| NM_001099308//NM_001099349//NM_006185873 |               |               |               |               | -1.04  | -1.31  | -1.13  | <b>Gm11007//Gm14308//Gm143</b>      | predicted gene 11007//predicted gene 14308//predicted gene 1          | 0006355 // regulation of transcription, DNA-templated // inferred from electronic annotation                                                                                               |
| NM_001042605//NM_000685659               |               |               |               |               | -1.28  | -1.22  | -1.13  | <b>Cd74</b>                         | CD74 antigen (invariant polypeptide of major histocompatibility co    | 0000187 // activation of MAPK activity // not recorded//0001516 // prostaglandin biosynthetic process // not recorded//0001961 // positive regulation of cytokine-mediated sign            |
| NM_013912                                | 0.006826226   |               |               |               | -1.05  | -1.24  | -1.13  | <b>Apln</b>                         | apelin                                                                | 0002026 // regulation of the force of heart contraction // not recorded//0007165 // signal transduction // inferred from electronic annotation//0007186 // G-protein coupled recep         |
| NM_029436//XM_00_000648036               |               |               |               |               | -1.18  | -1.11  | -1.14  | <b>Klhl24</b>                       | kelch-like 24                                                         | 0016567 // protein ubiquitination // not recorded//200312 // regulation of kainate selective glutamate receptor activity // inferred from electronic annotation                            |
| NM_010217                                | 0.00849896    |               |               |               | 1.35   | 1.03   | -1.14  | <b>Ctcf</b>                         | connective tissue growth factor                                       | 0001502 // cartilage condensation // inferred from direct assay//0001503 // ossification // inferred from mutant phenotype//0001525 // angiogenesis // inferred from direct assay,         |
| NM_001122892//NM_000254945               |               |               |               |               | -1.18  | -1.30  | -1.14  | <b>Fyn</b>                          | Fyn proto-oncogene                                                    | 0001764 // neuron migration // inferred from genetic interaction//0001764 // neuron migration // inferred from mutant phenotype//0002250 // adaptive immune response // infer              |
| NM_001276383//NM_153060//XM_5.97E-04     |               |               |               |               | -1.11  | -1.37  | -1.14  | <b>Spns2</b>                        | spinster homolog 2                                                    | 0001782 // B cell homeostasis // inferred from mutant phenotype//0002260 // lymphocyte homeostasis // inferred from mutant phenotype//0002920 // regulation of humoral imm                 |
| NM_011948//XM_006523329                  |               |               |               |               | -1.10  | -1.18  | -1.14  | <b>Mkp3k4</b>                       | mitogen-activated protein kinase kinase kinase 4                      | 0000165 // MAPK cascade // not recorded//0000186 // activation of MAPK activity // not recorded//0000187 // activation of MAPK activity // not recorded//0001890 // placenta               |
| NM_172398//XM_00_000854638               |               |               |               |               | -1.19  | -1.10  | -1.14  | <b>Akr1b10</b>                      | aldo-keto reductase family 1, member B10 (aldose reductase)           | 00055114 // oxidation-reduction process // inferred from electronic annotation                                                                                                             |
| NM_013737//XM_00_000645464               |               |               |               |               | -1.14  | -1.04  | -1.14  | <b>Pis2g7</b>                       | phospholipase A2, group VII (platelet-activating factor acetylhydro   | 0006629 // lipid metabolic process // inferred from electronic annotation//0006954 // inflammatory response // traceable author statement//0016042 // lipid catabolic process // h         |
| NM_010391//NM_01_00016031                |               |               |               |               | -1.24  | -1.18  | -1.14  | <b>H2-Q10</b>                       | histocompatibility 2, Q region locus 10                               | 0002376 // immune system process // inferred from electronic annotation//0002474 // antigen processing and presentation of peptide antigen via MHC class II // not recorded//000           |
| NM_021534                                | 0.00343374    |               |               |               | -1.19  | -1.13  | -1.14  | <b>Pmp4</b>                         | peroxisomal membrane protein 4                                        |                                                                                                                                                                                            |
| NM_007903                                | 0.004087877   |               |               |               | -1.05  | -1.22  | -1.14  | <b>Edn3</b>                         | endothelin 3                                                          | 0001755 // neural crest cell migration // inferred from mutant phenotype//0002690 // positive regulation of leukocyte chemotaxis // not recorded//0003100 // regulation of system          |
| NM_001163640//NM_000511251               |               |               |               |               | 1.21   | 1.06   | -1.14  | <b>Chn2</b>                         | chimerin 2                                                            | 0007165 // signal transduction // inferred from electronic annotation//0035556 // intracellular signal transduction // inferred from electronic annotation//0043547 // positive regul      |
| NM_001122899//NM_010704//NM_009543374    |               |               |               |               | -1.10  | -1.28  | -1.15  | <b>Lepr</b>                         | leptin receptor                                                       | 0001525 // angiogenesis // not recorded//0007165 // signal transduction // traceable author statement//0007186 // G-protein coupled receptor signaling pathway // not recorded,            |
| NM_001281852//NM_3.36E-04                |               |               |               |               | -2.85  | -1.69  | -1.15  | <b>S100a9</b>                       | S100 calcium binding protein A9 (calgranulin B)                       | 0002376 // immune system process // inferred from electronic annotation//0002523 // leukocyte migration involved in inflammatory response // not recorded//0002544 // chronic              |
| NM_008520//XM_00_000353953               |               |               |               |               | -1.22  | -1.29  | -1.15  | <b>Ltbp3</b>                        | latent transforming growth factor beta binding protein 3              | 0001501 // skeletal system development // inferred from mutant phenotype//0007179 // transforming growth factor beta receptor signaling pathway // inferred from mutant pheno              |
| NM_025785//XM_00_000447636               |               |               |               |               | -1.16  | -1.12  | -1.15  | <b>Fbxo25</b>                       | F-box protein 25                                                      | 0016567 // protein ubiquitination // inferred from direct assay                                                                                                                            |
| NM_133351//XM_00_000308314               |               |               |               |               | -1.25  | -1.08  | -1.15  | <b>Prss8</b>                        | protease, serine 8 (prostinin)                                        | 0001942 // hair follicle development // inferred from mutant phenotype//0006508 // proteolysis // inferred from electronic annotation//0010765 // positive regulation of sodium ic         |
| NM_001048054//NM_1.99E-04                |               |               |               |               | 1.28   | 1.13   | -1.15  | <b>Dusp16</b>                       | dual specificity phosphatase 16                                       | 0000188 // inactivation of MAPK activity // inferred from direct assay//0006470 // protein dephosphorylation // not recorded//0016310 // phosphorylation // inferred from electro          |
| NM_012026//XM_00_000298236               |               |               |               |               | -1.22  | -1.19  | -1.15  | <b>Arhgef28</b>                     | Rho guanine nucleotide exchange factor (GEF) 28                       | 0021955 // central nervous system neuron axonogenesis // inferred from mutant phenotype//0003154 // cell differentiation // inferred from electronic annotation//00035023 // reg           |
| NM_001159329//NM_025332//NM_00630718     |               |               |               |               | -1.15  | -1.27  | -1.15  | <b>Gtppb8</b>                       | GTP-binding protein 8 (putative)                                      | 0000917 // barrier septum assembly // inferred from electronic annotation                                                                                                                  |
| NM_152895//XM_01_000348007               |               |               |               |               | -1.18  | -1.22  | -1.16  | <b>Kdms5b</b>                       | lysine (K)-specific demethylase 5B                                    | 0006351 // transcription, DNA-templated // inferred from electronic annotation//0006355 // regulation of transcription, DNA-templated // inferred from electronic annotation//000          |
| NM_001164059//NM_0009107                 |               |               |               |               | -1.15  | -1.16  | -1.16  | <b>Sell</b>                         | selectin, lymphocyte                                                  | 0007155 // cell adhesion // inferred from electronic annotation//003198 // response to ATP // inferred from direct assay//0004201 // response to oleic acid // inferred from electr        |
| NM_025786                                | 0.00187184    |               |               |               | -1.30  | -1.24  | -1.16  | <b>Rnf186</b>                       | ring finger protein 186                                               |                                                                                                                                                                                            |
| NM_001201413//NM_001201414//NM_0016      |               |               |               |               |        |        |        |                                     |                                                                       |                                                                                                                                                                                            |

| RefSeq       | Transcript ID                  | p (24h n=460) | p (48h n=657) | p (72h n=805) | FC 24h      | FC 48h | FC 72h | Gene Symbol                       | Gene Title                                                             | Gene Ontology Biological Process                                                                                                                                                         |                                                                                                                                                                                        |
|--------------|--------------------------------|---------------|---------------|---------------|-------------|--------|--------|-----------------------------------|------------------------------------------------------------------------|------------------------------------------------------------------------------------------------------------------------------------------------------------------------------------------|----------------------------------------------------------------------------------------------------------------------------------------------------------------------------------------|
| NM_001081309 | //NM_00589131                  |               |               |               | -1.15       | -1.12  | -1.17  | <b>Pik3r4</b>                     | phosphatidylinositol 3 kinase, regulatory subunit, poly peptide 4, p1  | 0006468 // protein phosphorylation // not recorded // 0006623 // protein targeting to vacuole // not recorded // 0016236 // macroautophagy // not recorded // 0016310 // phospho         |                                                                                                                                                                                        |
| NM_001304475 | //NM_145446//NM_175337//Xv     |               |               |               | -1.10       | -1.06  | -1.17  | <b>Mh3</b>                        | muti homology 3 (E coli)                                               | 0006298 // mismatch repair // inferred from genetic interaction // 0006298 // mismatch repair // inferred from mutant phenotype // 0006974 // cellular response to DNA damage str        |                                                                                                                                                                                        |
| NM_001033127 | //NM_001111011//NM_177311//    |               |               |               | 1.04        | -1.04  | -1.17  | <b>Serac1</b>                     | serine activator site containing 1                                     | 0006629 // lipid metabolic process // inferred from electronic annotation // 0008654 // phospholipid biosynthetic process // inferred from electronic annotation // 0030198 // extrac    |                                                                                                                                                                                        |
| NM_0169177   | //XM_00081068                  |               |               |               | -1.15       | -1.10  | -1.17  | <b>Slc40a1</b>                    | serine carrier family 40 (iron-regulated transporter), member 1        | 0006269 // lymphocyte homeostasis // inferred from mutant phenotype // 0003158 // endothelium development // inferred from mutant phenotype // 0006810 // transport // inf               |                                                                                                                                                                                        |
| NM_008729    | //XM_006520032//XM_0007134052  |               |               |               | -1.03       | -1.23  | -1.17  | <b>Ctndd2</b>                     | catenin (cadherin associated protein), delta 2                         | 0001763 // morphogenesis of a branching structure // inferred from direct assay // 0006351 // transcription, DNA-templated // inferred from electronic annotation // 0006355 // regu     |                                                                                                                                                                                        |
| NM_011812    | //XM_006515864//XM_006529001// |               |               |               | -1.13       | -1.44  | -1.17  | <b>Fbln5</b>                      | fibulin 5                                                              | 0001755 // regulation of cell growth // inferred from electronic annotation // 0007155 // cell adhesion // inferred from electronic annotation // 0003198 // extracellular matrix organi |                                                                                                                                                                                        |
| NM_001114385 | //NM_031258//XM_006529001//    |               |               |               | 0.00810582  | -1.04  | 1.01   | <b>Chrd1l</b>                     | chordin-like 1                                                         | 0001503 // ossification // inferred from electronic annotation // 0001654 // eye development // not recorded // 0001709 // cell fate determination // not recorded // 0007275 // muli    |                                                                                                                                                                                        |
| NM_133858    | //NM_19_000886008              |               |               |               | -1.15       | -1.11  | -1.17  | <b>Fam36a</b>                     | family with sequence similarity 63, member A                           |                                                                                                                                                                                          |                                                                                                                                                                                        |
| NM_001290745 | //NM_016965//XM_006499881//    |               |               |               | 0.00861665  | -1.07  | -1.13  | <b>Nckap1</b>                     | NCK-associated protein 1                                               | 0001701 // in utero embryonic development // inferred from mutant phenotype // 0001756 // somitogenesis // inferred from mutant phenotype // 0001843 // neural tube closure //           |                                                                                                                                                                                        |
| NM_001146275 | //NM_00288293                  |               |               |               | -1.69       | -1.31  | -1.17  | <b>Interf</b>                     | interferon inducible GTPase 1                                          | 0002376 // immune system process // inferred from electronic annotation // 0008152 // metabolic process // inferred from electronic annotation // 0010506 // regulation of autoph        |                                                                                                                                                                                        |
| NM_011657    | //XM_006505909//XR_0008048018  |               |               |               | 0.0065621   | -1.06  | -1.17  | <b>Tulp3</b>                      | tubby-like protein 3                                                   | 0001841 // neural tube formation // inferred from mutant phenotype // 0001843 // neural tube closure // inferred from mutant phenotype // 0007275 // multicellular organismal dev        |                                                                                                                                                                                        |
| NM_015732    | //XM_00_0009297946             |               |               |               | -1.18       | -1.17  | -1.17  | <b>Axin2</b>                      | axin2                                                                  | 0001756 // somitogenesis // inferred from direct assay // 0001934 // positive regulation of protein phosphorylation // not recorded // 0001957 // intramembranous ossification // inf    |                                                                                                                                                                                        |
| NM_001081300 | //NM_00730591                  |               |               |               | -1.15       | -1.19  | -1.18  | <b>Tshz1</b>                      | teashirt zinc finger family member 1                                   | 0006351 // transcription, DNA-templated // inferred from electronic annotation // 0006355 // regulation of transcription, DNA-templated // inferred from electronic annotation // 000    |                                                                                                                                                                                        |
| NM_051385    | //XM_011247883                 |               |               |               | 0.00667963  | -1.02  | -1.15  | <b>Col4a6</b>                     | collagen, type IV, alpha 6                                             | 0003198 // extracellular matrix organization // inferred from direct assay // 0071230 // cellular response to amino acid stimulus // inferred from direct assay                          |                                                                                                                                                                                        |
| NM_010453    | 5_74E-05 001072674             |               |               |               | -1.48       | -1.43  | -1.18  | <b>Hoxa5</b>                      | homeobox A5                                                            | 001150 // skeletal system development // inferred from mutant phenotype // 0002009 // morphogenesis of an epithelium // inferred from mutant phenotype // 0003016 // respirat            |                                                                                                                                                                                        |
| NM_001079824 | //XM_00457865 006742058        |               |               |               | -1.18       | -1.22  | -1.18  | <b>Hnrnp3</b>                     | heterogeneous nuclear ribonucleoprotein H3                             | 0030855 // epithelial cell differentiation // inferred from electronic annotation                                                                                                        |                                                                                                                                                                                        |
| NM_00117773  | //NM_001177774//NM_080428//    |               |               |               | 0.00759114  | -1.05  | -1.13  | <b>Fbxw7</b>                      | F-box and WD-40 domain protein 7                                       | 0001570 // vasculogenesis // inferred from mutant phenotype // 0001944 // vasculature development // traceable author statement // 0006355 // regulation of transcription, DNA-te        |                                                                                                                                                                                        |
| NM_007792    | 0.00960092                     |               |               |               | 1.01        | 1.11   | -1.18  | <b>Csrp2</b>                      | cysteine and glycine-rich protein 2                                    | 0007275 // multicellular organismal development // inferred from electronic annotation // 0030154 // cell differentiation // inferred from electronic annotation // 0045445 // myobla    |                                                                                                                                                                                        |
| NM_029738    | //XM_006522701//NM_006522702// |               |               |               | 0.00654555  | -1.02  | -1.15  | <b>Ctup1</b>                      | clustern associated protein 1                                          | 0001843 // neural tube closure // inferred from mutant phenotype // 0001947 // heart looping // inferred from mutant phenotype // 0007224 // smoothed signaling pathway // inf           |                                                                                                                                                                                        |
| NM_001313939 | //NM_3_58E-04                  |               |               |               | -1.41       | -1.27  | -1.19  | <b>Cd79b</b>                      | CD79B antigen                                                          | 0002250 // adaptive immune response // inferred from electronic annotation // 0002376 // immune system process // inferred from electronic annotation // 0007166 // cell surface r       |                                                                                                                                                                                        |
| NM_010706    | //XM_006539566                 |               |               |               | 0.00960752  | 1.01   | -1.10  | <b>Lgals4</b>                     | lectin, galactose binding, soluble 4                                   |                                                                                                                                                                                          |                                                                                                                                                                                        |
| NM_001162532 | 5.10E-04                       |               |               |               | -1.17       | -1.45  | -1.19  | <b>Fam174b</b>                    | family with sequence similarity 174, member B                          |                                                                                                                                                                                          |                                                                                                                                                                                        |
| NM_011748    | //NM_178733//XM_006539948//XM  |               |               |               | 0.00608039  | -1.06  | -1.12  | <b>Zfp14</b>                      | zinc finger protein 14                                                 | 0006355 // regulation of transcription, DNA-templated // not recorded                                                                                                                    |                                                                                                                                                                                        |
| NM_001306088 | //NM_00093547                  |               |               |               | -1.15       | -1.08  | -1.19  | <b>Dnmbp</b>                      | dynamid binding protein 1                                              | 0030203 // regulation of Rho protein signal transduction // inferred from electronic annotation // 0035556 // intracellular signal transduction // inferred from electronic annotat      |                                                                                                                                                                                        |
| NM_00117778  | //NM_001177779//               |               |               |               | 0.009131226 | -1.12  | -1.18  | <b>Dlg3</b>                       | discs, large homolog 3 (Drosophila)                                    | 0001736 // establishment of planar polarity // inferred from mutant phenotype // 0007268 // synaptic transmission // not recorded // 0007399 // nervous system development // not        |                                                                                                                                                                                        |
| NM_021719    | 0.00454522                     |               |               |               | -1.06       | -1.17  | -1.19  | <b>Cldn15</b>                     | claudin 15                                                             | 0006810 // transport // inferred from electronic annotation // 0006811 // ion transport // inferred from electronic annotation // 0016338 // calcium-independent cell-cell adhesion vi   |                                                                                                                                                                                        |
| NM_001085515 | //XM_00037944                  |               |               |               | -1.22       | -1.19  | -1.19  | <b>Al64131</b>                    | expressed sequence A464131                                             | 0005975 // carbohydrate metabolic process // inferred from electronic annotation // 0008152 // metabolic process // inferred from electronic annotation // 0043558 // positive regul     |                                                                                                                                                                                        |
| NM_025347    | //NM_02_00966351               |               |               |               | -1.21       | -1.09  | -1.19  | <b>Ype3</b>                       | ypocell-like 3 (Drosophila)                                            | 0006915 // apoptotic process // inferred from electronic annotation // 2000774 // positive regulation of cellular senescence // not recorded                                             |                                                                                                                                                                                        |
| NM_001136076 | //NM_011031//XM_0001857876     |               |               |               | -1.22       | -1.37  | -1.19  | <b>P4ha2</b>                      | procollagen-proline, 2-oxoglutarate 4-dioxygenase (proline 4-hydr      | 0018401 // peptidyl-proline hydroxylation to 4-hydroxy-L-proline // inferred from direct assay // 0055114 // oxidation-reduction process // inferred from electronic annotation          |                                                                                                                                                                                        |
| NM_133238    | 0.00948798 0.006270198         |               |               |               | -1.18       | -1.43  | -1.19  | <b>Cd20a</b>                      | CD20a antigen                                                          | 0006897 // endocytosis // inferred from electronic annotation // 0010468 // regulation of gene expression // not recorded // 0003193 // regulation of blood coagulation // not record    |                                                                                                                                                                                        |
| NM_010225    | 0.00195853 0.004991675         |               |               |               | -1.22       | -1.23  | -1.19  | <b>Foxj2</b>                      | forkhead box F2                                                        | 0006351 // transcription, DNA-templated // inferred from electronic annotation // 0006355 // regulation of transcription, DNA-templated // inferred from electronic annotation // 000    |                                                                                                                                                                                        |
| NM_001285446 | //NM_09823//NM_172860//Xv      |               |               |               | 0.00982678  | -1.00  | -1.15  | <b>Cbfa2i2</b>                    | core-binding factor, runt domain, alpha subunit 2, translocated to,    | 0006351 // transcription, DNA-templated // inferred from electronic annotation // 0006355 // regulation of transcription, DNA-templated // inferred from electronic annotation // 00     |                                                                                                                                                                                        |
| NM_033373    | 0.00622604                     |               |               |               | -1.17       | -1.12  | -1.19  | <b>Krt23</b>                      | keratin 23                                                             |                                                                                                                                                                                          |                                                                                                                                                                                        |
| NM_001109988 | //NM_001109989//               |               |               |               | 0.003853193 | -1.15  | -1.49  | <b>Nrep</b>                       | neuronal regeneration related protein                                  | 0017015 // regulation of transforming growth factor beta receptor signaling pathway // inferred from direct assay // 0031103 // axon regeneration // inferred from electronic annotat    |                                                                                                                                                                                        |
| NM_020608    | //XM_006524699//XM_006524702// |               |               |               | 0.00983801  | -1.02  | -1.17  | <b>Cramp1l</b>                    | Crn, cramped-like (Drosophila)                                         |                                                                                                                                                                                          |                                                                                                                                                                                        |
| NM_008984    | //XM_006523864//XM_0002538469  |               |               |               | -1.04       | -1.29  | -1.19  | <b>Ptprm</b>                      | protein tyrosine phosphatase, receptor type, M                         | 0001937 // negative regulation of endothelial cell proliferation // not recorded // 0006470 // protein dephosphorylation // not recorded // 0007155 // cell adhesion // inferred from el |                                                                                                                                                                                        |
| NM_022814    | 0.0088749                      |               |               |               | 1.05        | -1.01  | -1.19  | <b>Svep1</b>                      | sushi, von Willebrand factor type A, EGF and pentraxin domain con      | 0007155 // cell adhesion // inferred from electronic annotation                                                                                                                          |                                                                                                                                                                                        |
| NM_0119306   | 0.00771691                     |               |               |               | -1.03       | -1.04  | -1.19  | <b>Adamts8</b>                    | a disintegrin-like and metalloproteinase (reprolysin type) with throm  | 0006508 // proteolysis // inferred from electronic annotation                                                                                                                            |                                                                                                                                                                                        |
| NM_007655    | 0.00117669                     |               |               |               | -1.50       | -1.32  | -1.19  | <b>Cd79a</b>                      | CD79A antigen (immunoglobulin-associated alpha)                        | 0002250 // adaptive immune response // inferred from electronic annotation // 0006355 // immune system process // inferred from electronic annotation // 0007166 // cell surface r       |                                                                                                                                                                                        |
| NM_001167884 | //NM_001167885//NM_0011678     |               |               |               | 0.00577843  | -1.05  | -1.12  | <b>Suv420h1</b>                   | suppressor of variegation 4-20 homolog 1 (Drosophila)                  | 0006351 // transcription, DNA-templated // inferred from electronic annotation // 0006355 // regulation of transcription, DNA-templated // inferred from electronic annotation // 000    |                                                                                                                                                                                        |
| NM_011020    | //XM_006500766//NM_002094866   |               |               |               | -1.23       | -1.78  | -1.20  | <b>Hspad1</b>                     | heat shock protein 4 like                                              | 0006457 // protein folding // not recorded // 0006886 // response to unfolded protein // not recorded                                                                                    |                                                                                                                                                                                        |
| NM_009061    | 0.00943916                     |               |               |               | -1.12       | -1.32  | -1.20  | <b>Rgs2</b>                       | regulator of G-protein signaling 2                                     | 0006471 // regulation of translation // inferred from electronic annotation // 0007049 // cell cycle // inferred from electronic annotation // 0007186 // G-protein coupled receptor sig |                                                                                                                                                                                        |
| NM_001285793 | //NM_019804//XM_0009403271     |               |               |               | -1.10       | -1.35  | -1.20  | <b>Bqalnt4</b>                    | UDP-Gal-beta-GlcNAc beta 1,4-galactosyltransferase, poly peptide 4     | 0005975 // carbohydrate metabolic process // inferred from electronic annotation // 0006486 // protein glycosylation // inferred from electronic annotation                              |                                                                                                                                                                                        |
| NM_007533    | //XM_006539486//XR_881644      |               |               |               | 0.00936886  | -1.15  | 1.04   | <b>Bdkha</b>                      | branched chain ketocacid dehydrogenase E1, alpha polypeptide           | 0007584 // response to nutrient // inferred from electronic annotation // 0008152 // metabolic process // inferred from electronic annotation // 0009083 // branched-chain amino ac      |                                                                                                                                                                                        |
| XM_357640    | //XM_99_4.71E-05               |               |               |               | -1.46       | 1.03   | -1.20  | <b>Igk-v28//Igkc//Igk1//Igkv1</b> | immunoglobulin kappa chain variable 28 (V28) // immunoglobulin         | 0006898 // receptor-mediated endocytosis // not recorded // 0006910 // phagocytosis, recognition // not recorded // 0006911 // phagocytosis, engulfment // not recorded // 000695        |                                                                                                                                                                                        |
| NM_008256    | 0.00476513                     |               |               |               | -1.12       | -1.02  | -1.20  | <b>Hmgcs2</b>                     | 3-hydroxy-3-methylglutaryl-Coenzyme A synthase 2                       | 0008122 // kidney development // inferred from electronic annotation // 0001889 // liver development // inferred from electronic annotation // 0006629 // lipid metabolic process //     |                                                                                                                                                                                        |
| NM_023799    | //XM_01_000745062              |               |               |               | -1.16       | -1.34  | -1.20  | <b>Mgea5</b>                      | meningioma expressed antigen 5 (hyaluronidase)                         | 0006044 // N-acetylglucosamine metabolic process // not recorded // 0006517 // protein deglycosylation // not recorded // 0006612 // protein targeting to membrane // not record         |                                                                                                                                                                                        |
| NM_013905    | 0.00369991                     |               |               |               | -1.43       | 1.11   | -1.20  | <b>Heyl</b>                       | hairly/enhancer-of-split related with YRPW motif-like                  | 0003151 // outflow tract morphogenesis // inferred from genetic interaction // 0003181 // atrioventricular valve morphogenesis // inferred from genetic interaction // 0003184 // pul    |                                                                                                                                                                                        |
| NM_001302559 | //NM_000129079 0.008755075     |               |               |               | -1.44       | -1.01  | -1.20  | <b>Igkv1//Iglc1</b>               | immunoglobulin lambda variable 1 // immunoglobulin lambda constant 1   |                                                                                                                                                                                          |                                                                                                                                                                                        |
| NM_148938    | 0.00913573                     |               |               |               | -1.08       | -1.14  | -1.20  | <b>Slc1a3</b>                     | solute carrier family 1 (glial high affinity glutamate transporter), m | 0002230 // positive regulation of defense response to virus by host // not recorded // 0006536 // glutamate metabolic process // inferred from mutant phenotype // 0006537 // gluta      |                                                                                                                                                                                        |
| NM_001127351 | //NM_001177804//NM_022433//    |               |               |               | 0.00605833  | -1.00  | -1.09  | <b>Sirt3</b>                      | sirtuin 3                                                              | 0006476 // protein deacetylation // inferred from direct assay // 0006476 // protein deacetylation // not recorded // 0007568 // aging // inferred from electronic annotation // 00090   |                                                                                                                                                                                        |
| NM_001285917 | //NM_029653//NM_005758764      |               |               |               | -1.12       | -1.24  | -1.20  | <b>Dapk1</b>                      | death associated protein kinase 1                                      | 0006417 // regulation of translation // inferred from electronic annotation // 0006468 // protein phosphorylation // inferred from direct assay // 0006468 // protein phosphorylation,   |                                                                                                                                                                                        |
| NM_019819    | //XM_00_00038857               |               |               |               | -1.21       | 1.07   | -1.20  | <b>Dusp14</b>                     | dual specificity phosphatase 14                                        | 0001888 // inactivation of MAPK activity // inferred from electronic annotation // 0006470 // protein dephosphorylation // inferred from electronic annotation // 0016311 // dephosp     |                                                                                                                                                                                        |
| NM_018883    | //XM_006533760//XM_0002545798  |               |               |               | -1.26       | -1.30  | -1.20  | <b>Camk1k</b>                     | calmodulin/calmodulin-dependent protein kinase kinase 1, alpha         | 0006468 // protein phosphorylation // inferred from electronic annotation // 0016310 // phosphorylation // inferred from electronic annotation // 0032147 // activation of protein kin   |                                                                                                                                                                                        |
| NM_001102455 | //NM_001102456//               |               |               |               | -1.08       | -1.25  | -1.20  | <b>Aplp2</b>                      | amyloid beta (A4) precursor-like protein 2                             | 0001967 // suckling behavior // inferred from genetic interaction // 0006878 // cellular copper ion homeostasis // inferred from mutant phenotype // 0007176 // regulation of epider     |                                                                                                                                                                                        |
| NM_001310659 | //NM_008342//XM_0007797964     |               |               |               | -1.09       | -1.27  | -1.20  | <b>Igf2bp2</b>                    | insulin-like growth factor binding protein 2                           | 0001558 // regulation of cell growth // inferred from electronic annotation // 0007165 // signal transduction // inferred from electronic annotation // 0007565 // female pregnancy //   |                                                                                                                                                                                        |
| NM_029869    | //NM_133906//XM_00_004646215   |               |               |               | -1.05       | -1.28  | -1.20  | <b>Zksan1</b>                     | zinc finger with KRAB and SCAN domains 1                               | 0006351 // transcription, DNA-templated // inferred from electronic annotation // 0006355 // regulation of transcription, DNA-templated // not recorded                                  |                                                                                                                                                                                        |
| NM_001162973 | //NM_001162974//NM_027053//    |               |               |               | 0.00608147  | 1.00   | -1.16  | <b>Lrrc51</b>                     | leucine rich repeat containing 51                                      |                                                                                                                                                                                          |                                                                                                                                                                                        |
| NM_010062    | 0.00931373                     |               |               |               | -1.11       | -1.10  | -1.21  | <b>Dnase2a</b>                    | deoxyribonuclease II alpha                                             | 0000737 // DNA catabolic process, endonucleolytic // inferred from mutant phenotype // 0006259 // DNA metabolic process // inferred from electronic annotation // 0006308 // DNA         |                                                                                                                                                                                        |
| NM_011782    | //XM_011246127                 |               |               |               | 0.00749509  | -1.11  | -1.14  | -1.21                             | <b>Adamts5</b>                                                         | a disintegrin-like and metalloproteinase (reprolysin type) with throm                                                                                                                    | 0006508 // proteolysis // inferred from electronic annotation // 0042742 // defense response to bacterium // inferred from genetic interaction                                         |
| NM_025510    | //XM_006533940                 |               |               |               | 0.00698212  | -1.07  | -1.14  | -1.21                             | <b>Adpm</b>                                                            | ADP-ribose/CDP-alcohol diphosphatase, manganese dependent                                                                                                                                | 0008152 // metabolic process // inferred from electronic annotation                                                                                                                    |
| NM_001170537 | //NM_00914076                  |               |               |               | 0.00994408  | -1.14  | -1.27  | -1.21                             | <b>Mef2c</b>                                                           | myocyte enhancer factor 2C                                                                                                                                                               | 0000122 // negative regulation of transcription from RNA polymerase II promoter // inferred from genetic interaction // 0000122 // negative regulation of transcription from RNA pol   |
| NM_001037098 | //NM_026495//XM_006498259//    |               |               |               | 0.00475203  | -1.03  | -1.04  | -1.21                             | <b>Nucx2</b>                                                           | nucleus accumbens associated 2, BEN and BTB (PO2) domain cont                                                                                                                            | 0002885 // negative regulation of cell proliferation // not recorded // 0010608 // posttranscriptional regulation of gene expression // not recorded // 0016575 // histone deacetylato |
| NM_174847    | //XM_006522976//XM_0002111516  |               |               |               | -1.02       | -1.29  | -1.21  | <b>Ctcd2</b>                      | C2 calcium-dependent domain containing 2                               |                                                                                                                                                                                          |                                                                                                                                                                                        |
| NM_010382    | 0.002069863                    |               |               |               | -1.25       | -1.28  | -1.21  | <b>H2-Eb1</b>                     | histocompatibility 2, class II antigen E beta                          |                                                                                                                                                                                          |                                                                                                                                                                                        |
| NM_001285928 | //NM_001285929//               |               |               |               | -1.06       | -1.17  | -1.21  | <b>Ubxn10</b>                     | UBX domain protein 10                                                  | 0002376 // immune system process // inferred from electronic annotation // 0002504 // antigen processing and presentation of peptide or polysaccharide antigen via MHC class II // u     |                                                                                                                                                                                        |
| NM_008091    | //NM_00_00129949               |               |               |               | -1.28       | -1.03  | -1.21  | <b>Gata3</b>                      | GATA binding protein 3                                                 | 0000122 // negative regulation of transcription from RNA polymerase II promoter // inferred from direct assay // 0000902 // cell morphogenesis // inferred from mutant phenotype //      |                                                                                                                                                                                        |
| NM_001171147 | //NM_009534//XM_0008853333     |               |               |               | -1.01       | -1.22  | -1.21  | <b>Yap1</b>                       | yes-associated protein 1                                               | 0000902 // cell morphogenesis // inferred from mutant phenotype // 0001570 // vasculogenesis // inferred from mutant phenotype // 0003143 // embryonic heart tube morphogene             |                                                                                                                                                                                        |
| NM_177775    | //XM_006511221//XM_0002958888  |               |               |               | 0.00655575  | -1.14  | -1.24  | -1.21                             | <b>Eys13</b>                                                           | extended synaptotagmin-like protein 3                                                                                                                                                    | 0006810 // transport // inferred from electronic annotation // 0006869 // lipid transport // inferred from electronic annotation                                                       |
| NM_009210    | //NM_14_000718989              |               |               |               | -1.20       | -1.15  | -1.21  | <b>Hrf</b>                        | heparanase-like transcription factor                                   | 0000209 // protein polyubiquitination // inferred from electronic annotation // 0006301 // postreplication repair // inferred from electronic annotation // 0006351 // transcription, DT |                                                                                                                                                                                        |
| NM_028306    | //XM_00_000314892 1.73E-04     |               |               |               | -1.39       | -1.61  | -1.21  | <b>Hspa12b</b>                    | heat shock protein 12B                                                 |                                                                                                                                                                                          |                                                                                                                                                                                        |
| NM_001081225 | //XM_000284439                 |               |               |               | 1.16        | 1.02   | -1.21  | <b>Fam178a</b>                    | family with sequence similarity 178, member A                          | 0006281 // DNA repair // inferred from electronic annotation // 0006974 // cellular response to DNA damage stimulus // not recorded // 0031334 // positive regulation of protein con     |                                                                                                                                                                                        |
| NM_001013373 | //XM_006510132//               |               |               |               | 0.00191935  | -1.08  | -1.18  | -1.21                             | <b>Trpmss13</b>                                                        | transmembrane protease, serine 13                                                                                                                                                        | 0006508 // proteolysis // inferred from electronic annotation // 0006898 // receptor-mediated endocytosis // inferred from electronic annotation // 0061436 // establishment of skin   |
| NM_          |                                |               |               |               |             |        |        |                                   |                                                                        |                                                                                                                                                                                          |                                                                                                                                                                                        |



| RefSeq       | Transcript ID  | p (24h n=460)  | p (48h n=657)  | p (72h n=805) | FC 24h     | FC 48h      | FC 72h | Gene Symbol                                    | Gene Title                                                                                             | Gene Ontology Biological Process                                                                                                                                                                                                                                                                                                                                           |                                                                                                                                                                                             |
|--------------|----------------|----------------|----------------|---------------|------------|-------------|--------|------------------------------------------------|--------------------------------------------------------------------------------------------------------|----------------------------------------------------------------------------------------------------------------------------------------------------------------------------------------------------------------------------------------------------------------------------------------------------------------------------------------------------------------------------|---------------------------------------------------------------------------------------------------------------------------------------------------------------------------------------------|
| NM_009811    |                |                |                |               | 0.00465104 | -1.11       | -1.14  | <b>-1.27 Casp6</b>                             | caspase 6                                                                                              | 0002525 // acute inflammatory response to non-antigenic stimulus // not recorded // 0006508 // proteolysis // not recorded // 0006508 // proteolysis // inferred from reviewed com                                                                                                                                                                                         |                                                                                                                                                                                             |
| NM_001290740 | //NM_011723    | //NM_030560    | //NM_00687366  |               | 0.00687366 | -1.02       | -1.08  | <b>-1.27 Cwc22</b> // <b>-1.27 Xdh</b>         | CWC22 spliceosome-associated protein homolog (S. cerevisiae) //                                        | 0000398 // mRNA splicing, via spliceosome // not recorded // 0001933 // negative regulation of protein phosphorylation // not recorded // 0001937 // negative regulation of endothe                                                                                                                                                                                        |                                                                                                                                                                                             |
| NM_177727    | //NM_006500661 | //NM_006500618 |                |               | 0.0088671  | -1.12       | -1.26  | <b>-1.27 Lsm14b</b>                            | LSM14 homolog B (SCD5, S. cerevisiae)                                                                  | 0006417 // regulation of translation // inferred from electronic annotation // 0007275 // multicellular organismal development // inferred from electronic annotation                                                                                                                                                                                                      |                                                                                                                                                                                             |
| NM_002868    |                |                | 0.00951198     | 0.004995458   |            | -1.20       | -1.24  | <b>-1.27 Hmx5</b>                              | homeobox B5                                                                                            | 0006351 // transcription, DNA-templated // inferred from electronic annotation // 0006355 // regulation of transcription, DNA-templated // inferred from direct assay // 0006366 // t                                                                                                                                                                                      |                                                                                                                                                                                             |
| NM_001110009 | //NM_00180989  |                |                |               |            | -1.27       | -1.06  | <b>-1.27 Apoc1</b>                             | apolipoprotein C-I                                                                                     | 0006641 // triglyceride metabolic process // inferred from mutant phenotype // 00006810 // transport // inferred from electronic annotation // 0006869 // lipid transport // inferred fr                                                                                                                                                                                   |                                                                                                                                                                                             |
| NM_008609    |                |                | 0.00644142     |               |            | -1.11       | -1.27  | <b>-1.27 Mmp15</b>                             | matrix metalloproteinase 15                                                                            | 0006508 // proteolysis // inferred from electronic annotation // 0032355 // response to estradiol // inferred from electronic annotation // 0035987 // endometrial cell differentiation,                                                                                                                                                                                   |                                                                                                                                                                                             |
| NM_025638    | //NM_006533944 |                | 0.00152505     |               |            | -1.08       | -1.13  | <b>-1.27 Gdpd1</b>                             | glycerophosphodiester phosphodiesterase domain containing 1                                            | 0006071 // glycerol metabolic process // inferred from electronic annotation // 0006629 // lipid metabolic process // inferred from electronic annotation                                                                                                                                                                                                                  |                                                                                                                                                                                             |
| NM_027494    | //NM_006530457 | //NM_011248240 |                |               | 0.00447972 | -1.08       | -1.12  | <b>-1.28 Zcch8</b>                             | zinc finger, CCHC domain containing 8                                                                  | 0006399 // mRNA processing // inferred from electronic annotation // 0008380 // RNA splicing // inferred from electronic annotation                                                                                                                                                                                                                                        |                                                                                                                                                                                             |
| NM_001289782 | //NM_00497211  | 2.11E-04       |                |               |            | -1.21       | -1.38  | <b>-1.28 Cryab</b>                             | crystallin, alpha B                                                                                    | 0001666 // response to hypoxia // inferred from mutant phenotype // 0002088 // lens development in camera-type eye // inferred from genetic interaction // 0006457 // protein fold                                                                                                                                                                                         |                                                                                                                                                                                             |
| NM_153198    | //NM_17        | 0.00377578     |                |               |            | -1.35       | -1.27  | <b>-1.28 Hbp1</b>                              | high mobility group box transcription factor 1                                                         | 0006351 // transcription, DNA-templated // inferred from electronic annotation // 0006355 // regulation of transcription, DNA-templated // inferred from electronic annotation // 000                                                                                                                                                                                      |                                                                                                                                                                                             |
| NM_001161763 | //NM_001161765 | //NM_010232    |                |               | 0.00104899 | -1.06       | -1.11  | <b>-1.28 Fmo5</b>                              | flavin containing monooxygenase 5                                                                      | 0017144 // drug metabolic process // not recorded // 00055114 // oxidation-reduction process // not recorded                                                                                                                                                                                                                                                               |                                                                                                                                                                                             |
| NM_001166597 | //NM_00052117  |                | 0.00395366     |               |            | -1.20       | -1.23  | <b>-1.28 Dgkz</b>                              | diacylglycerol kinase zeta                                                                             | 0007205 // protein kinase C-activating G-protein coupled receptor signaling pathway // inferred from electronic annotation // 0016310 // phosphorylation // not recorded // 0031571                                                                                                                                                                                        |                                                                                                                                                                                             |
| NM_001311122 | //NM_00602292  |                | 0.00578565     |               |            | -1.22       | -1.12  | <b>-1.28 Lrrc16a</b>                           | leucine rich repeat containing 16A                                                                     | 0016477 // cell migration // not recorded // 0030032 // lamellipodium assembly // not recorded // 0030335 // positive regulation of cell migration // inferred from mutant phenotype                                                                                                                                                                                       |                                                                                                                                                                                             |
| NM_011902    |                |                | 0.00161931     |               |            | -1.03       | -1.03  | <b>-1.28 Tek2</b>                              | tek2n 2                                                                                                | 0030030 // cell projection organization // inferred from electronic annotation // 0030317 // sperm motility // inferred from mutant phenotype // 0036159 // inner dynein arm assem                                                                                                                                                                                         |                                                                                                                                                                                             |
| NM_001025432 | //NM_006521751 |                | 5.33E-04       |               |            | -1.01       | -1.34  | <b>-1.28 Crebbp</b>                            | CREB binding protein                                                                                   | 0001222 // negative regulation of transcription from RNA polymerase I promoter // not recorded // 0006351 // transcription, DNA-templated // inferred from electronic annotation // 0001525 // angiogenesis // inferred from electronic annotation // 0001938 // positive regulation of endothelial cell proliferation // not recorded // 0002376 // immune system process |                                                                                                                                                                                             |
| NM_000858    | //NM_006515566 |                | 8.40E-05       |               |            | 0.00187625  | -1.08  | -1.50                                          | <b>-1.28 Prkd1</b>                                                                                     | protein kinase D1                                                                                                                                                                                                                                                                                                                                                          | 0001503 // ossification // inferred from electronic annotation // 0001525 // angiogenesis // inferred from electronic annotation // 0001938 // positive regulation of endothelial cell pr   |
| NM_001252653 | //NM_007895    | //NM_006500984 |                |               | 0.00565337 | -1.09       | -1.06  | <b>-1.28 Ecm1</b>                              | extracellular matrix protein 1                                                                         | 0001503 // ossification // inferred from electronic annotation // 0001525 // angiogenesis // inferred from electronic annotation // 0001938 // positive regulation of endothelial cell pr                                                                                                                                                                                  |                                                                                                                                                                                             |
| NM_001093149 | //NM_001285885 | //NM_006968951 |                |               |            | -1.15       | -1.34  | <b>-1.28 Gm12942</b> // <b>-1.28 Zmym6</b>     | predicted gene 12942 // zinc finger, MYM-type 6 cytochrome P450, family 2, subfamily d, polypeptide 22 | 0007010 // cytoskeletal organization // not recorded // 0002260 // regulation of cell morphogenesis // not recorded // 0001503 // positive regulation of endothelial cell pr                                                                                                                                                                                               |                                                                                                                                                                                             |
| NM_001163472 | //NM_019823    |                | 0.00457534     |               |            | -1.08       | -1.11  | <b>-1.28 Cyp2d2</b>                            | cytochrome P450, family 2, subfamily d, polypeptide 22                                                 | 0006805 // xenobiotic metabolic process // not recorded // 0007565 // female pregnancy // inferred from electronic annotation // 0010033 // response to organic substance // infer                                                                                                                                                                                         |                                                                                                                                                                                             |
| NM_025933    |                |                | 0.00291985     |               |            | -1.02       | -1.04  | <b>-1.28 Higd2a</b>                            | HIG1 domain family, member 2A                                                                          | 0006810 // transport // inferred from electronic annotation // 0043066 // negative regulation of apoptotic process // not recorded // 0005114 // oxidation-reduction process // infer                                                                                                                                                                                      |                                                                                                                                                                                             |
| NM_009780    | //NM_006523531 | //NM_006523532 |                |               | 0.00130037 | -1.03       | -1.07  | <b>-1.29 Cab1</b> // <b>-1.29 LOC102643089</b> | complement component 4B (Chido blood group) // complement C                                            | 0002376 // immune system process // inferred from electronic annotation // 0006954 // inflammatory response // inferred from electronic annotation // 0006956 // complement act                                                                                                                                                                                            |                                                                                                                                                                                             |
| NM_001313757 | //NM_007397    | //NM_006511925 |                |               | 0.00400254 | -1.07       | -1.22  | <b>-1.29 Acriv2b</b>                           | actin receptor IB                                                                                      | 0000122 // negative regulation of transcription from RNA polymerase I promoter // not recorded // 0001501 // skeletal system development // inferred from genetic interaction // OC                                                                                                                                                                                        |                                                                                                                                                                                             |
| NM_001291903 | //NM_009623    | //NM_006520319 |                |               | 0.00774957 | <b>1.02</b> | -1.09  | <b>-1.29 Adcy8</b>                             | adenylyate cyclase 8                                                                                   | 0006171 // cAMP biosynthetic process // not recorded // 0007189 // adenylyate cyclase-activating G-protein coupled receptor signaling pathway // not recorded // 0007193 // adenyly                                                                                                                                                                                        |                                                                                                                                                                                             |
| NM_007881    |                |                | 7.89E-04       |               |            | -1.03       | -1.01  | <b>-1.29 Atn1</b>                              | atrophin 1                                                                                             | 0000122 // negative regulation of transcription from RNA polymerase I promoter // inferred from direct assay // 0000122 // negative regulation of transcription from RNA polymer                                                                                                                                                                                           |                                                                                                                                                                                             |
| NM_011401    | //NM_006505822 | //NM_006525647 |                |               | 0.0021223  | -1.15       | -1.26  | <b>-1.29 Slc2a3</b>                            | solute carrier family 2 (facilitated glucose transporter), member 3                                    | 0006810 // transport // inferred from electronic annotation // 0008643 // carbohydrate transport // inferred from electronic annotation // 0015758 // glucose transport // inferred fr                                                                                                                                                                                     |                                                                                                                                                                                             |
| NM_001044751 | //NM_008288    | //NM_006497227 |                |               | 0.00261837 | -1.04       | -1.11  | <b>-1.29 Hsd11b1</b>                           | hydroxysteroid 11-beta dehydrogenase 1                                                                 | 0006629 // lipid metabolic process // inferred from electronic annotation // 0006704 // glucocorticoid biosynthetic process // not recorded // 0006713 // glucocorticoid catabolic pro                                                                                                                                                                                     |                                                                                                                                                                                             |
| NM_137344    | //NM_00        | 0.00198241     |                |               | 0.00917043 | -1.20       | -1.09  | <b>-1.29 Tdrp</b>                              | testis development related protein                                                                     | 0007283 // spermatogenesis // not recorded                                                                                                                                                                                                                                                                                                                                 |                                                                                                                                                                                             |
| NM_133237    |                |                | 5.95E-04       |               |            | -1.16       | -1.30  | <b>-1.29 Apcd1</b>                             | adenomatous polyposis col down-regulated 1                                                             | 0001942 // hair follicle development // not recorded // 0016055 // Wnt signaling pathway // inferred from electronic annotation // 0003178 // negative regulation of Wnt signaling pa                                                                                                                                                                                      |                                                                                                                                                                                             |
| NM_133898    | //NM_00        | 6.10E-04       | 0.003046447    |               | 0.00249839 | -1.28       | -1.34  | <b>-1.29 Ntbp21</b>                            | NEDD4 binding protein 2-like 1                                                                         | 0006520 // cellular amino acid metabolic process // inferred from electronic annotation // 0007623 // circadian rhythm // inferred from electronic annotation // 0009636 // response                                                                                                                                                                                       |                                                                                                                                                                                             |
| NM_001190448 | //NM_016672    | //NM_001337507 |                |               | 0.00109191 | -1.16       | -1.40  | <b>-1.29 Ddc</b>                               | dopa decarboxylase                                                                                     | 0006351 // transcription, DNA-templated // inferred from electronic annotation // 0006355 // regulation of transcription, DNA-templated // inferred from electronic annotation // 000                                                                                                                                                                                      |                                                                                                                                                                                             |
| NM_144837    | //NM_01124451  | //XR_382437    |                |               | 0.00165726 | -1.05       | -1.15  | <b>-1.29 Icel1</b>                             | interactor of the cell elongation complex ELL subunit 1                                                | 0006520 // cellular amino acid metabolic process // inferred from electronic annotation // 0007623 // circadian rhythm // inferred from electronic annotation // 0009636 // response                                                                                                                                                                                       |                                                                                                                                                                                             |
| NM_145394    |                |                | 0.007113169    |               | 0.00165529 | -1.18       | -1.23  | <b>-1.29 Slc44a3</b>                           | solute carrier family 4A, member 3                                                                     | 0002376 // immune system process // inferred from electronic annotation // 0002523 // leukocyte migration involved in inflammatory response // not recorded // 0002526 // acute i                                                                                                                                                                                          |                                                                                                                                                                                             |
| NM_013650    |                | 2.29E-04       |                |               |            | -2.98       | -1.81  | <b>-1.29 S100a8</b>                            | S100 calcium binding protein A8 (calgranulin A)                                                        | 0002376 // immune system process // inferred from electronic annotation // 0002523 // leukocyte migration involved in inflammatory response // not recorded // 0002526 // acute i                                                                                                                                                                                          |                                                                                                                                                                                             |
| NM_029933    | //NM_00        | 0.00409769     | 0.002907983    |               | 0.00732456 | -1.20       | -1.26  | <b>-1.30 Bcl9</b>                              | B cell CLL/lymphoma 9                                                                                  | 0014908 // myotube differentiation involved in skeletal muscle regeneration // inferred from genetic interaction // 00016055 // Wnt signaling pathway // inferred from electronic anno                                                                                                                                                                                     |                                                                                                                                                                                             |
| NM_009626    | //NM_006500919 | //NM_006500920 |                |               | 0.00251234 | -1.17       | -1.10  | <b>-1.30 Num1a</b>                             | alcohol dehydrogenase 7 (class IV), mu or sigma polypeptide                                            | 0001503 // retinoid metabolic process // not recorded // 0006067 // ethanol metabolic process // not recorded // 0006068 // ethanol metabolic process // inferred from mutant phen                                                                                                                                                                                         |                                                                                                                                                                                             |
| NM_133947    | //NM_00        | 0.00532344     |                |               | 0.00458652 | -1.11       | -1.22  | <b>-1.30 Fx6b</b>                              | nuclear mitotic apparatus protein 1                                                                    | 0001372 // establishment of mitotic spindle orientation // inferred from mutant phenotype // 00051321 // meiotic cell cycle // inferred from electronic annotation // 00060487 // lung e                                                                                                                                                                                   |                                                                                                                                                                                             |
| NM_001162494 | //NM_008056    | //NM_006520438 |                |               | 0.00153224 | -1.01       | -1.17  | <b>-1.30 Higd1b</b>                            | HIG1 domain family, member 1B                                                                          | 0006469 // negative regulation of protein kinase activity // inferred from direct assay // 0035556 // intracellular signal transduction // not recorded // 0061099 // negative regulati                                                                                                                                                                                    |                                                                                                                                                                                             |
| NM_08084     | //NM_006534395 | //NM_006534396 |                |               | 0.00185491 | -1.10       | -1.21  | <b>-1.30 Sk3bp5</b>                            | SK3-domain binding protein 5 (BTK-associated)                                                          | 0006469 // negative regulation of protein kinase activity // inferred from direct assay // 0035556 // intracellular signal transduction // not recorded // 0061099 // negative regulati                                                                                                                                                                                    |                                                                                                                                                                                             |
| NM_011884    | //NM_006519013 | //NM_006519015 |                |               | 0.00533577 | -1.03       | -1.10  | <b>-1.30 Cytb5d1</b>                           | cytochrome b5 domain containing 1                                                                      | 0006469 // negative regulation of protein kinase activity // inferred from direct assay // 0035556 // intracellular signal transduction // not recorded // 0061099 // negative regulati                                                                                                                                                                                    |                                                                                                                                                                                             |
| NM_001045525 | //NM_011249073 |                | 0.00423348     |               |            | -1.31       | -1.18  | <b>-1.30 Tspyl4</b>                            | TSPY-like 4                                                                                            | 0006334 // nucleosome assembly // inferred from electronic annotation                                                                                                                                                                                                                                                                                                      |                                                                                                                                                                                             |
| NM_030203    |                | 0.00220143     |                |               | 0.00329473 | -1.20       | -1.25  | <b>-1.30 Spnat13</b>                           | spermatogenesis associated 13                                                                          | 0006334 // nucleosome assembly // inferred from electronic annotation                                                                                                                                                                                                                                                                                                      |                                                                                                                                                                                             |
| NM_001032372 | //NM_00765177  |                | 0.00372383     |               | 1.12       | -1.18       | -1.30  | <b>-1.30 Mertk</b>                             | c-met proto-oncogene tyrosine kinase                                                                   | 0016477 // cell migration // not recorded // 0030032 // lamellipodium assembly // not recorded // 0030334 // regulation of cell migration // not recorded // 0035023 // regulation of                                                                                                                                                                                      |                                                                                                                                                                                             |
| NM_008578    | //NM_006498860 |                | 0.0055816      |               |            | -1.04       | -1.15  | <b>-1.30 Dmd</b>                               | dystrophin, muscular dystrophy                                                                         | 0001779 // natural killer cell differentiation // inferred from genetic interaction // 0006468 // protein phosphorylation // not recorded // 0006909 // phagocytosis // not recorded // 00                                                                                                                                                                                 |                                                                                                                                                                                             |
| NM_001314034 | //NM_001314033 | //NM_001314040 |                |               | 0.0055816  | -1.04       | -1.15  | <b>-1.30 Dmd</b>                               | dystrophin, muscular dystrophy                                                                         | 0001954 // positive regulation of cell-matrix adhesion // inferred from mutant phenotype // 0002027 // regulation of heart rate // inferred from mutant phenotype // 0002027 // regu                                                                                                                                                                                       |                                                                                                                                                                                             |
| NM_001197321 | //NM_3.25E-04  | 4.51E-04       |                |               | 0.00982258 | -1.28       | -1.41  | <b>-1.30 Foxp1</b>                             | forkhead box P1                                                                                        | 0000122 // negative regulation of transcription from RNA polymerase I promoter // inferred from direct assay // 0000122 // negative regulation of transcription from RNA polymer                                                                                                                                                                                           |                                                                                                                                                                                             |
| NM_018884    | //NM_00        | 0.00525579     | 1.98E-04       |               | 0.00232707 | -1.23       | -1.46  | <b>-1.30 Pdzn3</b>                             | PDZ domain containing RING finger 3                                                                    | 0006810 // neuromuscular junction development // inferred from mutant phenotype // 0016567 // protein ubiquitination // inferred from direct assay                                                                                                                                                                                                                         |                                                                                                                                                                                             |
| NM_001159529 | //NM_00981256  |                | 0.00489347     |               | -1.22      | -1.13       | -1.30  | <b>-1.30 Cox7a2l</b>                           | cytochrome c oxidase subunit VIIa polypeptide 2-like                                                   | 0002082 // regulation of oxidative phosphorylation // inferred from mutant phenotype // 00097250 // mitochondrial respiratory chain supercomplex assembly // inferred from direct                                                                                                                                                                                          |                                                                                                                                                                                             |
| NM_177242    |                |                | 0.00251847     |               | -1.01      | -1.06       | -1.30  | <b>-1.30 Pptc7</b>                             | PPTC7 protein phosphatase (S. cerevisiae)                                                              | 0006470 // protein dephosphorylation // inferred from electronic annotation // 0008152 // metabolic process // inferred from electronic annotation                                                                                                                                                                                                                         |                                                                                                                                                                                             |
| NM_133218    | //NM_006530055 |                | 0.00467643     |               | 1.03       | -1.17       | -1.30  | <b>-1.30 Zfp704</b>                            | zinc finger protein 704                                                                                | 00051607 // defense response to virus // inferred from electronic annotation                                                                                                                                                                                                                                                                                               |                                                                                                                                                                                             |
| NM_001243916 | //NM_00039332  |                | 0.00414976     |               | -1.02      | -1.27       | -1.30  | <b>-1.30 Antxr1</b>                            | atriaxin toxin receptor 1                                                                              | 0007165 // signal transduction // not recorded // 0022414 // reproductive process // inferred from mutant phenotype // 0031532 // actin cytoskeleton reorganization // not recorded                                                                                                                                                                                        |                                                                                                                                                                                             |
| NM_178626    | //NM_006534320 |                | 0.00891308     |               | -1.02      | -1.18       | -1.30  | <b>-1.30 Cdc42e2</b>                           | CDH2 small effector 2                                                                                  | 0006909 // phagocytosis // inferred from electronic annotation // 0007165 // signal transduction // not recorded // 0008360 // regulation of cell shape // inferred from electronic an                                                                                                                                                                                     |                                                                                                                                                                                             |
| NM_026347    | //NM_006515175 | //NM_006515176 |                |               | 0.0036121  | -1.20       | -1.04  | <b>-1.30 Iah1</b>                              | isoamyl acetate-hydrolyzing esterase 1 homolog (S. cerevisiae)                                         | 0006629 // lipid metabolic process // inferred from electronic annotation // 0016042 // lipid catabolic process // inferred from electronic annotation                                                                                                                                                                                                                     |                                                                                                                                                                                             |
| NM_026141    | //NM_006512832 | //XR_380072    |                |               | 0.00169483 | -1.06       | -1.15  | -1.30                                          | <b>-1.30 Ppil4</b>                                                                                     | peptidylprolyl isomerase (chaperin)-like 4                                                                                                                                                                                                                                                                                                                                 | 0000413 // protein peptidyl-prolyl isomerization // not recorded // 0006457 // protein folding // inferred from electronic annotation // 1901407 // regulation of phosphorylation of Rf     |
| NM_001039184 | //NM_006529900 | //NM_006529900 |                |               | 0.00905664 | -1.00       | -1.09  | -1.30                                          | <b>-1.30 Cep350</b>                                                                                    | centrosomal protein 350                                                                                                                                                                                                                                                                                                                                                    | 0034453 // microtubule anchoring // inferred from electronic annotation                                                                                                                     |
| NM_007818    |                | 0.00607943     |                |               | 1.30       | -1.42       | -1.31  | <b>-1.31 Cyp3a11</b>                           | cytochrome P450, family 3, subfamily a, polypeptide 11                                                 | 0005114 // oxidation-reduction process // inferred from electronic annotation                                                                                                                                                                                                                                                                                              |                                                                                                                                                                                             |
| NM_001123327 | //NM_006500458 | //NM_006500454 |                |               | 0.00109792 | -1.03       | -1.24  | -1.31                                          | <b>-1.31 Qser1</b>                                                                                     | glutamine and serine rich 1                                                                                                                                                                                                                                                                                                                                                | 0006351 // transcription, DNA-templated // inferred from electronic annotation // 0006355 // regulation of transcription, DNA-templated // inferred from electronic annotation              |
| NM_009672    | //NM_006510778 | //NM_006510778 |                |               | 0.00801359 | -1.12       | -1.31  | <b>-1.31 Anp32a</b>                            | acidic (leucine-rich) nuclear phosphoprotein 32 family, member A                                       | 0006468 // protein phosphorylation // not recorded // 0006979 // response to oxidative stress // inferred from direct assay // 0007346 // regulation of mitotic cell cycle // not recorde                                                                                                                                                                                  |                                                                                                                                                                                             |
| NM_133985    | //NR_045693    | //NM_006511919 | //NM_006511919 |               | 0.00540533 | -1.04       | -1.11  | -1.31                                          | <b>-1.31 Oxsr1</b>                                                                                     | oxidative-stress responsive 1                                                                                                                                                                                                                                                                                                                                              | 0007165 // signal transduction // inferred from electronic annotation // 0007264 // small GTPase mediated signal transduction // not recorded // 0008360 // regulation of cell shape //     |
| NM_176837    | //NM_006512885 | //NM_011243213 |                |               | 0.00510432 | -1.04       | -1.15  | -1.31                                          | <b>-1.31 Arhgap18</b>                                                                                  | Rho GTPase activating protein 18                                                                                                                                                                                                                                                                                                                                           | 0000187 // activation of MAPK activity // inferred from direct assay // 0006979 // response to oxidative stress // inferred from direct assay // 0007165 // signal transduction // inferre  |
| NM_001301298 | //NM_000865401 | 0.003944993    |                |               | 0.00187503 | -1.17       | -1.24  | -1.31                                          | <b>-1.31 Gobi1</b>                                                                                     | growth factor receptor bound protein 2-associated protein 1                                                                                                                                                                                                                                                                                                                | 0007049 // cell cycle // inferred from electronic annotation // 0007050 // cell cycle arrest // not recorded // 0008285 // negative regulation of cell proliferation // not recorded // 001 |
| NM_031392    |                | 0.00143825     |                |               | -1.09      | -1.05       | -1.31  | <b>-1.31 Wdr6</b>                              | WD repeat domain 6                                                                                     | 0007095 // mitochondrion organization // non-traceable author statement // 0007052 // mitotic spindle organization // inferred from direct assay // 0008610 // lipid biosynthetic pro                                                                                                                                                                                      |                                                                                                                                                                                             |
| NM_001293757 | //NM_001293758 | //NM_001293757 |                |               | 0.00309847 | -1.06       | -1.05  | -1.31                                          | <b>-1.31 Dctn6</b>                                                                                     | dyctn6 (never in mitosis gene a)-related expressed kinase 9                                                                                                                                                                                                                                                                                                                | 0006468 // protein phosphorylation // not recorded // 0007049 // cell cycle // inferred from electronic annotation // 0007052 // mitotic nuclear division // inferred from electronic an    |
| NM_001039530 | //NM_00652392  | //NM_006523929 |                |               | 0.0020614  | -1.13       | -1.13  | -1.31                                          | <b>-1.31 Parp14</b>                                                                                    | poly (ADP-ribose) polymerase family, member 14                                                                                                                                                                                                                                                                                                                             | 0006351 // transcription, DNA-templated // inferred from electronic annotation // 0006355 // regulation of transcription, DNA-templated // inferred from electronic annotation // 000       |
| NM_001081069 |                |                | 0.00251007     |               | -1.14      | -1.23       | -1.31  | <b>-1.31 Rgs11</b>                             | regulator of G-protein signaling 11                                                                    | 0007186 // G-protein coupled receptor signaling pathway // traceable author statement // 0009968 // negative regulation of signal transduction // inferred from electronic annotation                                                                                                                                                                                      |                                                                                                                                                                                             |
| NM_144551    | //NM_006515054 | //NM_006515055 |                |               | 0.00231598 | -1.01       | -1.21  | -1.31                                          | <b>-1.31 Trib2</b>                                                                                     | tribbles homolog 2 (Drosophila)                                                                                                                                                                                                                                                                                                                                            | 0006468 // protein phosphorylation // inferred from electronic annotation // 0032436 // positive regulation of proteasomal ubiquitin-dependent protein catabolic process // inferred i      |
| NM_001109690 | //NM_001109691 | //NM_138755    |                |               | 0.0026076  | -1.11       | -1.12  | -1.31                                          | <b>-1.31 Phf21a</b>                                                                                    | PHD finger protein 21A                                                                                                                                                                                                                                                                                                                                                     | 0000122 // negative regulation of transcription from RNA polymerase I promoter // not recorded // 0001967 // sucking behavior // inferred from mutant phenotype // 0006351 // tr            |
| NM_026639    |                | 6.38E-04       |                |               | 9.62E-04   | -1.10       | -1.32  | -1.31                                          | <b>-1.31 Arta</b>                                                                                      | ADP-ribosyltransferase 4                                                                                                                                                                                                                                                                                                                                                   | 0006471 // protein ADP-ribosylation // inferred from electronic annotation                                                                                                                  |
| NM_0261      |                |                |                |               |            |             |        |                                                |                                                                                                        |                                                                                                                                                                                                                                                                                                                                                                            |                                                                                                                                                                                             |

| RefSeq       | Transcript ID | p (24h n=460) | p (48h n=657) | p (72h n=805) | FC 24h     | FC 48h | FC 72h | Gene Symbol     | Gene Title                                                       | Gene Ontology Biological Process                                                                                                                                                     |                                                                                                                                                                                             |
|--------------|---------------|---------------|---------------|---------------|------------|--------|--------|-----------------|------------------------------------------------------------------|--------------------------------------------------------------------------------------------------------------------------------------------------------------------------------------|---------------------------------------------------------------------------------------------------------------------------------------------------------------------------------------------|
| NM_175518    | /NM_006537925 | /NM_011250037 |               |               | 0.00170902 | -1.08  | -1.14  | -1.32           | <b>Tmem245</b>                                                   | transmembrane protein 245                                                                                                                                                            |                                                                                                                                                                                             |
| NM_197999    | /NM_006531391 | /NM_006531392 |               |               | 4.12E-04   | -1.05  | -1.32  | -1.32           | <b>Ces2g</b>                                                     | carboxylesterase 2G                                                                                                                                                                  | 00081152 // metabolic process // inferred from electronic annotation                                                                                                                        |
| NM_001013414 | /NM_001291118 | /NM_001291118 |               |               | 0.00465085 | -1.04  | -1.18  | -1.32           | <b>Neur4f</b>                                                    | neuronal E3 ubiquitin protein ligase 4                                                                                                                                               |                                                                                                                                                                                             |
| NM_001077361 | /NM_001077362 | /NM_001021287 |               |               | 0.00229826 | -1.10  | -1.20  | -1.32           | <b>Fhl1</b>                                                      | four and a half LIM domains 1                                                                                                                                                        | 00032554 // regulation of membrane depolarization // not recorded // 0007275 // multicellular organismal development // inferred from electronic annotation // 0010972 // negative          |
| NM_176737    | /NM_006538825 |               |               |               | 5.40E-04   | 1.02   | -1.12  | -1.32           | <b>Cep104</b>                                                    | centrosomal protein 104                                                                                                                                                              |                                                                                                                                                                                             |
| NM_011663    |               | 0.002148202   |               |               |            | -1.11  | -1.25  | -1.32           | <b>Zrsr1</b>                                                     | zinc finger (CCCH type), RNA binding motif and serine/arginine rich 1                                                                                                                |                                                                                                                                                                                             |
| NM_175309    |               |               |               |               | 0.00509452 | -1.05  | -1.03  | -1.32           | <b>Upk3b</b>                                                     | uroplakin 3B                                                                                                                                                                         | 0010629 // negative regulation of gene expression // not recorded // 0046325 // negative regulation of glucose import // inferred from mutant phenotype                                     |
| NM_010474    |               | 0.00344019    |               |               | 0.00668088 | -1.28  | 1.15   | -1.32           | <b>Hs3t1</b>                                                     | heparan sulfate (glucosamine) 3-O-sulfotransferase 1                                                                                                                                 | 0008152 // metabolic process // inferred from electronic annotation                                                                                                                         |
| NM_031257    | /NM_006509227 | /NM_006509227 |               |               | 8.86E-04   | -1.02  | -1.34  | -1.33           | <b>Plekha2</b>                                                   | pleckstrin homology domain-containing, family A (phosphoinositid                                                                                                                     | 00019954 // positive regulation of cell-matrix adhesion // not recorded                                                                                                                     |
| NM_025290    |               | 0.003556988   |               |               |            | 1.02   | -1.26  | -1.33           | <b>RspH1</b>                                                     | radial spoke head 1 homolog (Chlamydomonas)                                                                                                                                          | 0035082 // axoneme assembly // not recorded // 0051321 // meiotic cell cycle // inferred from electronic annotation                                                                         |
| NM_001199059 | /NM_019983    | /NM_006504446 |               |               | 0.00801718 | -1.06  | -1.07  | -1.33           | <b>Rabgef1</b>                                                   | RAB guanine nucleotide exchange factor (GEF) 1                                                                                                                                       | 0001933 // negative regulation of protein phosphorylation // inferred from mutant phenotype // 0002686 // negative regulation of leukocyte migration // inferred from mutant phen           |
| NM_199029    | /NM_00101378  |               |               |               | 0.00845424 | -1.17  | -1.15  | -1.33           | <b>Zfp395</b>                                                    | zinc finger protein 395                                                                                                                                                              | 0006353 // regulation of transcription from RNA polymerase II promoter // not recorded                                                                                                      |
| NM_001113333 | /NM_000837567 | 0.001752195   |               |               | 0.00262895 | -1.21  | -1.38  | -1.33           | <b>Cp2</b>                                                       | cryptochrome 2 (photolyase-like)                                                                                                                                                     | 0001122 // negative regulation of transcription from RNA polymerase II promoter // not recorded // 0006381 // DNA repair // inferred from electronic annotation // 0006351 // trans         |
| NM_053200    |               |               |               |               | 0.00404769 | -1.07  | -1.02  | -1.33           | <b>Ces1d</b>                                                     | carboxylesterase 1D                                                                                                                                                                  | 0006629 // lipid metabolic process // inferred from electronic annotation // 0006637 // acyl-CoA metabolic process // traceable author statement // 0009636 // response to toxic sub        |
| NM_001037136 | /NM_178119    |               |               |               | 0.00357796 | -1.08  | -1.12  | -1.33           | <b>Aagp1</b>                                                     | ArfGAP with GTPase domain, ankyrin repeat and PH domain 1                                                                                                                            | 0006810 // transport // inferred from electronic annotation // 0007165 // signal transduction // inferred from electronic annotation // 0007264 // small GTPase mediated signal trans       |
| NM_001305284 | /NM_001305286 | 0.004262139   |               |               |            | -1.06  | -1.37  | -1.33           | <b>Mpd2</b>                                                      | multiple PDZ domain protein                                                                                                                                                          | 0007155 // cell adhesion // inferred from direct assay // 0042552 // myelination // not recorded                                                                                            |
| NM_001159367 | /NM_000217006 |               |               |               |            | 1.28   | -1.10  | -1.33           | <b>Per1</b>                                                      | period circadian clock 1                                                                                                                                                             | 0001122 // negative regulation of transcription from RNA polymerase I promoter // inferred from direct assay // 0000122 // negative regulation of transcription from RNA polymer            |
| NM_001277970 | /NM_000481572 | 6.88E-04      |               |               |            | -1.23  | -1.53  | -1.33           | <b>Itna6</b>                                                     | integrin alpha 6                                                                                                                                                                     | 0007155 // cell adhesion // inferred from electronic annotation // 0007160 // cell-matrix adhesion // inferred from mutant phenotype // 0007229 // integrin-mediated signaling pathw        |
| NM_001040187 | /NM_152806    | /NM_008353866 |               |               | 0.0039879  | -1.07  | -1.26  | -1.33           | <b>Dxk17</b>                                                     | DEAD (Asp-Glu-Ala-Ser) box polypeptide 17                                                                                                                                            | 0006351 // transcription, DNA-templated // inferred from electronic annotation // 0006355 // regulation of transcription, DNA-templated // inferred from electronic annotation // 000       |
| NM_001005740 | /NM_001005748 | /NM_001301026 |               |               | 0.0024098  | -1.04  | -1.23  | -1.33           | <b>Phactr1</b>                                                   | phosphatase and actin regulator 1                                                                                                                                                    | 0031032 // actomyosin structure organization // inferred from mutant phenotype // 0003103 // actomyosin structure organization // not recorded // 0031532 // actin cytoskeleton r           |
| NM_000829    | /NM_006505459 | /NM_006505460 |               |               | 0.00369307 | -1.21  | -1.21  | -1.34           | <b>Cnd2</b>                                                      | cyclin D2                                                                                                                                                                            | 0000082 // G1/S transition of mitotic cell cycle // not recorded // 0001934 // positive regulation of protein phosphorylation // not recorded // 0007049 // cell cycle // inferred from el  |
| NM_001309390 | /NM_028783    | /NM_006510644 |               |               | 0.00791583 | -1.08  | -1.14  | -1.34           | <b>Robo4</b>                                                     | roundabout homolog 4 (Drosophila)                                                                                                                                                    | 0001525 // angiogenesis // not recorded // 0007275 // multicellular organismal development // inferred from electronic annotation // 0030154 // cell differentiation // inferred from e     |
| NM_016737    |               | 0.009858104   |               |               |            | -1.11  | -1.56  | -1.34           | <b>Stip1</b>                                                     | stress-induced phosphoprotein 1                                                                                                                                                      |                                                                                                                                                                                             |
| NM_145584    |               | 0.0020224     |               |               | 0.00318655 | -1.19  | -1.11  | -1.34           | <b>Spon1</b>                                                     | spondin 1, (f-spondin) extracellular matrix protein                                                                                                                                  | 0007155 // cell adhesion // inferred from electronic annotation                                                                                                                             |
| NM_001081149 | /NM_006509112 | /NM_006509112 |               |               | 0.00199466 | -1.05  | -1.19  | -1.34           | <b>Kat6a</b>                                                     | Klysine1 acetyltransferase 6A                                                                                                                                                        | 0003007 // heart morphogenesis // inferred from genetic interaction // 0003007 // heart morphogenesis // inferred from mutant phenotype // 0006334 // nucleosome assembly // in             |
| NM_001291910 | /NM_009624    | /NM_007432137 |               |               | 0.00136432 | -1.03  | -1.20  | -1.34           | <b>Adcy1</b>                                                     | adenylate cyclase 9                                                                                                                                                                  | 0006171 // cAMP biosynthetic process // inferred from direct assay // 0006173 // cAMP biosynthetic process // not recorded // 0006171 // cAMP biosynthetic process // traceable au          |
| NM_001311123 | /NM_011643    | /NM_006511053 |               |               | 0.00129362 | -1.06  | -1.15  | -1.34           | <b>Trcp1</b>                                                     | transient receptor potential cation channel, subfamily C, member 1                                                                                                                   | 0006810 // transport // inferred from electronic annotation // 0006811 // ion transport // inferred from electronic annotation // 0006816 // calcium ion transport // inferred from ele     |
| NM_139300    | /NM_006521702 | /NM_00606755  |               |               | 0.0050602  | -1.04  | -1.36  | -1.34           | <b>Myik</b>                                                      | myosin, light polypeptide kinase                                                                                                                                                     | 0002230 // positive regulation of defense response to virus by host // not recorded // 0006468 // protein phosphorylation // inferred from electronic annotation // 0006939 // smooth       |
| NM_020590    |               | 0.00696564    |               |               | -1.15      | -1.09  | -1.34  | <b>Gaporap1</b> | gamma-aminobutyric acid (GABA) A receptor-associated protein-III | 0000045 // autophagosome assembly // not recorded // 0000422 // mitophagy // not recorded // 0006914 // autophagy // inferred from electronic annotation // 0044804 // nucleop       |                                                                                                                                                                                             |
| NM_001025566 | /NM_001271496 | /NM_013490    |               |               | 8.30E-04   | 1.02   | -1.07  | -1.34           | <b>Chka</b>                                                      | choline kinase alpha                                                                                                                                                                 | 0006580 // ethanolamine metabolic process // not recorded // 0006629 // lipid metabolic process // inferred from electronic annotation // 0006646 // phosphatidylethanolamine bio           |
| NM_001013370 | /NM_001162908 | 9.25E-04      |               |               | 0.00861679 | -1.08  | -1.33  | -1.34           | <b>Sesn1</b>                                                     | serine 1                                                                                                                                                                             | 0051896 // regulation of protein kinase B signaling // inferred from direct assay // 1901031 // regulation of response to reactive oxygen species // inferred from electronic annota        |
| NM_001293701 | /NM_027241    |               |               |               | 4.35E-04   | -1.07  | -1.09  | -1.35           | <b>Polr3gl</b>                                                   | polymerase (RNA) III (DNA directed) polymerase G like                                                                                                                                | 0006359 // regulation of transcription from RNA polymerase III promoter // inferred from electronic annotation // 0006384 // transcription initiation from RNA polymerase III promot        |
| NM_001253885 | /NM_000497973 |               |               |               | 0.00231874 | -1.23  | -1.15  | -1.35           | <b>Abpb1</b>                                                     | amyloid beta (A4) precursor protein-binding, family B, member 1                                                                                                                      | 0001764 // neuron migration // inferred from genetic interaction // 0006302 // double-strand break repair // inferred from mutant phenotype // 0006302 // double-strand break repa          |
| NM_001472    | /NM_201239    |               |               |               | 8.11E-04   | -1.14  | -1.22  | -1.35           | <b>Rnase4</b>                                                    | ribonuclease, RNase A family 4                                                                                                                                                       |                                                                                                                                                                                             |
| NM_145586    | /NM_006507682 |               |               |               | 0.00200493 | -1.07  | -1.12  | -1.35           | <b>Tmem159</b>                                                   | transmembrane protein 159                                                                                                                                                            | 0001525 // angiogenesis // inferred from electronic annotation // 0001525 // angiogenesis // -- // 0001525 // angiogenesis // inferred from sequence or structural similarity // 00016      |
| NM_007409    |               | 0.001428181   |               |               |            | -1.17  | -1.27  | -1.35           | <b>Adh1</b>                                                      | alcohol dehydrogenase 1 (class I)                                                                                                                                                    | 0001523 // retinoid metabolic process // inferred from mutant phenotype // 0006068 // ethanol catabolic process // inferred from direct assay // 0006068 // ethanol catabolic proces        |
| NM_133663    | /NM_006532457 |               |               |               | 0.00255569 | -1.15  | -1.10  | -1.35           | <b>Pdk2</b>                                                      | pyruvate dehydrogenase kinase, isoenzyme 2                                                                                                                                           | 0005979 // carbohydrate metabolic process // inferred from electronic annotation // 0006006 // glucose metabolic process // inferred from electronic annotation // 0006111 // regul         |
| NM_007382    |               | 0.00351396    |               |               | 0.00351396 | -1.09  | -1.05  | -1.35           | <b>Acdm</b>                                                      | acyl-Coenzyme A dehydrogenase, medium chain                                                                                                                                          | 0001889 // liver development // inferred from mutant phenotype // 0005978 // glycogen biosynthetic process // inferred from mutant phenotype // 0006082 // organic acid metaboli            |
| NM_001033460 |               | 0.003626539   |               |               | 8.32E-04   | -1.03  | -1.22  | -1.35           | <b>Dcx1</b>                                                      | dyx1in regulatory complex subunit 1                                                                                                                                                  | 0007368 // determination of left/right symmetry // inferred from mutant phenotype // 0007507 // heart development // inferred from mutant phenotype // 0006285 // cilium-depen              |
| NM_001193271 | /NM_377E-05   | 0.001450011   |               |               | 6.43E-04   | -1.49  | -1.30  | -1.35           | <b>Meis1</b>                                                     | Meis homeobox 1                                                                                                                                                                      | 0001525 // angiogenesis // inferred from mutant phenotype // 0002088 // lens morphogenesis in camera-type eye // inferred from mutant phenotype // 0006351 // transcription, DN             |
| NM_011723    | /NM_011246381 | /NM_001290740 |               |               | 0.00409524 | -1.09  | -1.03  | -1.35           | <b>Xdh1/Cwc22</b>                                                | xanthine dehydrogenase // CWC22 spliceosome-associated protei                                                                                                                        | 0001923 // angiogenesis // inferred from mutant phenotype // not recorded // 0001937 // negative regulation of endothelial cell proliferation // not recorded // 0006919 // activation o    |
| NM_001081237 | /NM_000420363 | 0.007821989   |               |               | 0.00169184 | -1.19  | -1.31  | -1.35           | <b>Klhl42</b>                                                    | kelch-like 42                                                                                                                                                                        | 0002029 // protein polyubiquitination // not recorded // 0007049 // cell cycle // inferred from electronic annotation // 0007067 // mitotic nuclear division // inferred from electr        |
| NM_138590    | /NM_177027    | /NM_006537984 | /NM_00042718  |               | 2.63E-04   | -1.01  | -1.16  | -1.35           | <b>Zcch7c</b>                                                    | zinc finger, CCHC domain containing 7                                                                                                                                                |                                                                                                                                                                                             |
| NM_0012718   |               | 0.00394075    |               |               | -1.31      | -1.58  | -1.35  | <b>Ms4a4b</b>   | membrane-spanning 4-domains, subfamily A, member 4B              |                                                                                                                                                                                      |                                                                                                                                                                                             |
| NM_001290817 | /NM_009242    | 5.14E-04      |               |               | 3.54E-04   | -1.15  | -1.29  | -1.36           | <b>Sparc</b>                                                     | secreted acidic cysteine rich glycoprotein                                                                                                                                           | 0001503 // ossification // inferred from electronic annotation // 0001937 // negative regulation of endothelial cell proliferation // not recorded // 0007165 // signal transduction // inf |
| NM_017376    | /NM_153484    | /NM_006520744 | /NM_0007817   |               | 0.00274866 | -1.18  | -1.12  | -1.36           | <b>Tef</b>                                                       | tryptophan embryonic factor                                                                                                                                                          | 0006351 // transcription, DNA-templated // inferred from electronic annotation // 0006355 // regulation of transcription, DNA-templated // inferred from electronic annotation // 000       |
| NM_007817    |               | 0.004945      |               |               | -1.03      | -1.19  | -1.36  | <b>Cyp2f2</b>   | cytochrome P450, family 2, subfamily f, polypeptide 2            | 0006805 // xenobiotic metabolic process // not recorded // 0009636 // response to toxic substance // inferred from mutant phenotype // 0018931 // naphthalene metabolic process //   |                                                                                                                                                                                             |
| NM_001199141 | /NM_144516    | /NM_006516491 |               |               | 0.00274866 | -1.18  | -1.12  | -1.36           | <b>Tef</b>                                                       | tryptophan embryonic factor                                                                                                                                                          | 0006351 // transcription, DNA-templated // inferred from electronic annotation // 0006355 // regulation of transcription, DNA-templated // inferred from electronic annotation // 000       |
| NM_008304    |               | 0.00736489    |               |               | -1.08      | -1.29  | -1.36  | <b>Sdc2</b>     | syndecan 2                                                       | 0007399 // nervous system development // inferred from electronic annotation // 0016477 // cell migration // not recorded // 0030154 // cell differentiation // inferred from elect  |                                                                                                                                                                                             |
| NM_009284    |               | 0.0073247     |               |               | -1.16      | -1.30  | -1.36  | <b>Stat6</b>    | signal transducer and activator of transcription 6               | 0000122 // negative regulation of transcription from RNA polymerase II promoter // inferred from direct assay // 0000122 // negative regulation of transcription from RNA polymer    |                                                                                                                                                                                             |
| NM_012042    | /NM_000569502 |               |               |               | 0.00546097 | -1.22  | -1.19  | -1.36           | <b>Cul1</b>                                                      | cullin 1                                                                                                                                                                             | 0006511 // ubiquitin-dependent protein catabolic process // inferred by curator // 0006513 // protein monoubiquitination // inferred from genetic interaction // 0006915 // apoptotic       |
| NM_028763    |               | 0.00680922    |               |               | -1.09      | -1.10  | -1.36  | <b>Cbx6</b>     | chromobox 6                                                      | 0000122 // negative regulation of transcription from RNA polymerase II promoter // not recorded // 0006351 // transcription, DNA-templated // inferred from electronic annotation // |                                                                                                                                                                                             |
| NM_001081362 | /NM_006504781 | /NM_00650478  |               |               | 0.00219987 | -1.03  | -1.09  | -1.37           | <b>Trap</b>                                                      | transformation/transcription domain-associated protein                                                                                                                               | 0006281 // DNA repair // not recorded // 0006351 // transcription, DNA-templated // inferred from electronic annotation // 0006355 // regulation of transcription, DNA-templated //         |
| NM_001286468 | /NM_000212396 | 0.003012689   |               |               | 0.001005   | -1.41  | -1.40  | -1.37           | <b>Arhgap24</b>                                                  | Rho GTPase activating protein 24                                                                                                                                                     | 0006351 // angiogenesis // inferred from electronic annotation // 0007165 // signal transduction // inferred from electronic annotation // 0007275 // multicellular organismal develop      |
| NM_001163557 | /NM_000322478 | 0.002404311   |               |               | 0.00169824 | -1.29  | -1.31  | -1.37           | <b>Ppfibp2</b>                                                   | PTPRF interacting protein, binding protein 2 (liprin beta 2)                                                                                                                         |                                                                                                                                                                                             |
| NM_023186    |               | 0.00887344    |               |               | -1.31      | -1.51  | -1.37  | <b>Chia1</b>    | chitinase, acidic 1                                              | 0000272 // polysaccharide catabolic process // inferred from electronic annotation // 0002376 // immune system process // inferred from electronic annotation // 0002532 // produc   |                                                                                                                                                                                             |
| NM_001206367 | /NM_001206368 | /NM_00120636  |               |               | 9.21E-04   | -1.07  | -1.11  | -1.37           | <b>Gsn</b>                                                       | gelsolin                                                                                                                                                                             | 0006911 // phagocytosis, engulfment // inferred from mutant phenotype // 0006915 // apoptotic process // not recorded // 0007568 // aging // inferred from electronic annotation // 000     |
| NM_001113213 | /NM_001113214 | /NM_0011776   |               |               | 0.00909863 | -1.11  | -1.12  | -1.37           | <b>Odf2</b>                                                      | outer dense fiber of sperm tails 2                                                                                                                                                   | 0007275 // multicellular organismal development // inferred from electronic annotation // 0007283 // spermatogenesis // inferred from electronic annotation // 0007286 // spermat           |
| NM_008481    | /NM_006512566 | /NM_011243134 |               |               | 9.78E-04   | -1.11  | -1.18  | -1.37           | <b>Lama2</b>                                                     | laminin, alpha 2                                                                                                                                                                     | 0007155 // cell adhesion // inferred from electronic annotation // 0007411 // axon guidance // inferred from genetic interaction // 0022013 // myelination in peripheral nervous syste      |
| NM_001033481 | /NM_006526927 | 6.35E-04      |               |               | 6.57E-04   | -1.13  | -1.32  | -1.37           | <b>Myf1</b>                                                      | myelin regulatory factor                                                                                                                                                             | 0006351 // transcription, DNA-templated // inferred from electronic annotation // 0006355 // regulation of transcription, DNA-templated // inferred from electronic annotation // 000       |
| NM_175692    |               | 0.00147914    |               |               | -1.05      | -1.16  | -1.37  | <b>Snhg11</b>   | small nucleolar RNA host gene 11                                 |                                                                                                                                                                                      |                                                                                                                                                                                             |
| NM_001304744 | /NM_007714    | /NM_006532111 |               |               | 0.00622726 | 1.00   | -1.19  | -1.37           | <b>Cik4</b>                                                      | CDC like kinase 4                                                                                                                                                                    | 0006468 // protein phosphorylation // inferred from electronic annotation // 0016310 // phosphorylation // inferred from electronic annotation // 0018108 // peptidyl-tyrosine phosph       |
| NM_001040113 | /NM_001040113 | /NM_027180    |               |               | 0.00348318 | -1.09  | -1.11  | -1.37           | <b>Arp1</b>                                                      | ArfGAP with RhoGAP domain, ankyrin repeat and PH domain 1                                                                                                                            | 0001921 // positive regulation of receptor recycling // not recorded // 0007165 // signal transduction // inferred from electronic annotation // 0007179 // transforming growth factor      |
| NM_197986    | /NM_00654001  | 0.00369614    |               |               | -1.40      | -1.33  | -1.37  | <b>Tmem140</b>  | transmembrane protein 140                                        |                                                                                                                                                                                      |                                                                                                                                                                                             |
| NM_001253755 | /NM_172605    | /NM_006518909 |               |               | 0.00656467 | -1.13  | -1.25  | -1.37           | <b>Tdrd5</b>                                                     | tudor domain containing 5                                                                                                                                                            | 0006397 // mRNA processing // inferred from electronic annotation // 0016568 // chromatin modification // inferred from electronic annotation // 1903506 // regulation of nucleic a         |
| NM_001243132 | /NM_520E-04   |               |               |               | 0.00107842 | -1.31  | -1.25  | -1.37           | <b>Tspan2</b>                                                    | tetraspanin 2                                                                                                                                                                        | 0006954 // inflammatory response // inferred from genetic interaction // 0007166 // cell surface receptor signaling pathway // not recorded // 0007420 // brain development // infer        |
| NM_023402    |               | 0.001264852   |               |               | 0.00826063 | -1.09  | -1.32  | -1.38           | <b>Myh12b</b>                                                    | myosin, light chain 12B, regulatory                                                                                                                                                  | 0008360 // regulation of cell shape // inferred from mutant phenotype // 0007057 // platelet aggregation // not recorded                                                                    |
| NM_001163748 | /NM_008804    | /NM_008764171 |               |               | 0.00108919 | -1.20  | -1.21  | -1.38           | <b>Pde9a</b>                                                     | phosphodiesterase 9A                                                                                                                                                                 | 0007165 // signal transduction // inferred from electronic annotation // 0010613 // positive regulation of cardiac muscle hypertrophy // inferred from mutant phenotype // 0046068 //       |
| NM_001083929 | /NM_008161    |               |               |               | 0.00114975 | -1.10  | 1.03   | -1.38           | <b>Gpx3</b>                                                      | glutathione peroxidase 3                                                                                                                                                             | 0006749 // glutathione metabolic process // not recorded // 0006979 // response to oxidative stress // inferred from electronic annotation // 0042744 // hydrogen peroxide catabolic        |
| NM_009349    |               | 0.00154834    |               |               | -1.05      | 1.01   | -1.38  | <b>Inmt</b>     | indolethylamine N-methyltransferase                              | 0009308 // amine metabolic process // not recorded // 00                                                                                                                             |                                                                                                                                                                                             |

| RefSeq       | Transcript ID | p (24h n=460) | p (48h n=657) | p (72h n=805) | FC 24h     | FC 48h | FC 72h          | Gene Symbol                    | Gene Title                                            | Gene Ontology Biological Process                                     |
|--------------|---------------|---------------|---------------|---------------|------------|--------|-----------------|--------------------------------|-------------------------------------------------------|----------------------------------------------------------------------|
| NM_001286728 | /NM_337E-04   |               |               |               | 0.00321229 | -1.32  | -1.22           | -1.39                          | <i>Glkci1</i>                                         | glucocorticoid induced transcription 1                               |
| NM_011546    | /NM_006525767 | /NM_006525769 |               |               | 0.00624649 | 1.06   | -1.14           | -1.39                          | <i>Zeb1</i>                                           | zinc finger E-box binding homeobox 1                                 |
| NM_001013786 | /NM_006516710 | /NM_00651671  |               |               | 0.00163829 | -1.05  | -1.12           | -1.39                          | <i>Zscan26</i>                                        | zinc finger and SCAN domain containing 26                            |
| NM_145220    | /NM_006513508 | /NM_006513509 |               |               | 0.00470725 | 1.04   | 1.00            | -1.39                          | <i>Appl2</i>                                          | apoferritin protein, phosphotyrosine interaction, PH domain and leuc |
| NM_019427    | /NM_000872323 |               |               |               | 6.86E-04   | -1.15  | -1.18           | -1.39                          | <i>Epb414b</i>                                        | erythrocyte membrane protein band 4.1 like 4b                        |
| NM_010197    | /NM_006525641 | /NM_008898494 |               |               | 4.76E-04   | -1.16  | -1.29           | -1.39                          | <i>Fg1</i>                                            | fibroblast growth factor 1                                           |
| NM_011416    | /NM_026003    | /NM_000559034 |               |               | 0.00665594 | -1.01  | -1.30           | -1.39                          | <i>Smarca2</i>                                        | SWI/SNF related, matrix associated, actin dependent regulator of c   |
| NM_00131148  | /NM_021605    | /NM_006529770 |               |               | 0.00665594 | -1.02  | -1.08           | -1.39                          | <i>Nek7</i>                                           | NIMA (never in mitosis gene a)-related expressed kinase 7            |
| NM_133871    | /NM_006502485 | /NM_006502486 |               |               | 0.00827549 | -1.01  | -1.56           | -1.39                          | <i>Ifi44</i>                                          | interferon-inducible protein 44                                      |
| NM_001289490 | /NM_001289491 | /NM_207219    |               |               | 0.00186866 | -1.13  | -1.25           | -1.39                          | <i>Oard1</i>                                          | O-acyl-ADP-ribose deacylase 1                                        |
| NM_013785    |               |               |               |               | 0.00107573 | -1.15  | -1.11           | -1.40                          | <i>Ip6k1</i>                                          | inositol hexaphosphate kinase 1                                      |
| NM_212457    |               |               |               |               | 0.0011152  | -1.15  | -1.08           | -1.40                          | <i>Be4</i>                                            | brain expressed gene 4                                               |
| NM_133738    |               | 0.00948514    |               |               | 6.03E-04   | 1.00   | -1.49           | -1.40                          | <i>Artx2</i>                                          | antitoxin receptor 2                                                 |
| NM_145492    | /NM_006525819 | /NM_006525820 |               |               | 0.00306098 | 1.02   | -1.10           | -1.40                          | <i>Zfp521</i>                                         | zinc finger protein 521                                              |
| NM_173781    | /NM_006511736 | /NM_006511737 |               |               | 0.00656108 | -1.14  | -1.09           | -1.40                          | <i>Rab6b</i>                                          | RAB6B, member RAS oncogene family                                    |
| NM_001310837 | /NM_010656    | /NM_003679679 |               |               | 7.98E-04   | -1.11  | -1.37           | -1.40                          | <i>Ssn</i>                                            | sarcospan                                                            |
| NM_001199136 | /NM_001199137 | /NM_0040695   |               |               | 5.02E-04   | -1.14  | -1.29           | -1.40                          | <i>Mucf1</i>                                          | microtubule-actin crosslinking factor 1                              |
| NM_0021883   | /NM_006537772 | /NM_006537773 |               |               | 1.64E-04   | -1.16  | -1.23           | -1.40                          | <i>Tmod1</i>                                          | tropomodulin 1                                                       |
| NM_133829    | /NM_178081    | /NM_006496374 | /NM_000105510 |               | 0.0041381  | -1.11  | -1.29           | -1.41                          | <i>Msf6</i>                                           | major facilitator superfamily domain containing 6                    |
| NM_001005510 |               |               |               |               | 0.0037105  | -1.15  | -1.08           | -1.41                          | <i>Syne2</i>                                          | spectrin repeat containing, nuclear envelope 2                       |
| NM_001154799 | /NM_007796    | /NM_001145801 |               |               | 0.0034878  | -1.06  | -1.50           | -1.41                          | <i>Ctla2b</i>                                         | cytotoxic T lymphocyte-associated protein 2 alpha//cytotoxic T ly    |
| NM_138756    | /NM_006510870 | /NM_006510871 |               |               | 0.00397328 | -1.16  | -1.29           | -1.41                          | <i>Slc25a36</i>                                       | solute carrier family 25, member 36                                  |
| NM_146126    |               |               |               |               | 0.0041585  | -1.13  | -1.17           | -1.41                          | <i>Sord</i>                                           | sorbitol dehydrogenase                                               |
| NM_001081188 | /NM_006512207 | /NM_00651220  |               |               | 0.00883526 | -1.12  | -1.24           | -1.41                          | <i>Exoc7</i>                                          | exosome component 7                                                  |
| NM_016678    | /NM_006538086 |               |               |               | 0.0083015  | -1.04  | -1.15           | -1.41                          | <i>Reck</i>                                           | reversion-inducing-cysteine-rich protein with kazal motifs           |
| NM_025817    |               | 0.00135585    | 3.71E-04      |               | 0.00533326 | -1.36  | -1.52           | -1.41                          | <i>Tril</i>                                           | TLR intracellular with leucine-rich repeats                          |
| NM_017394    | /NM_006540196 | /NM_001890356 |               |               | 0.0023255  | -1.13  | -1.34           | -1.42                          | <i>Slc7a10</i>                                        | solute carrier family 7 (cationic amino acid transporter, y+ system) |
| NM_011542    | /NM_006538710 | /NM_006538711 |               |               | 0.00128194 | -1.09  | -1.10           | -1.42                          | <i>Tec3</i>                                           | transcription elongation factor A [SII], 3                           |
| NM_001168620 | /NM_032003    | /NM_006367763 |               |               | -1.19      | -1.36  | -1.42           | <i>Enpp5</i>                   | ectonucleotide pyrophosphatase/phosphodiesterase 5    |                                                                      |
| NM_001199187 | /NM_026937    | /NM_008646874 |               |               | -1.06      | -1.25  | -1.42           | <i>Ascl1</i>                   | activating signal integrator 1 complex subunit 1      |                                                                      |
| NM_0027144   | /NM_006510586 | /NM_011242597 |               |               | 3.40E-04   | -1.08  | -1.10           | -1.42                          | <i>Arhgef12</i>                                       | Rho guanine nucleotide exchange factor (GEF) 12                      |
| NM_001271407 | /NM_001271408 | /NM_0012714   |               |               | 0.0070907  | -1.14  | -1.19           | -1.42                          | <i>Sorbs3</i>                                         | sorbin and SH3 domain containing 3                                   |
| NM_001112725 | /NM_626E-04   |               |               |               | 1.31       | 1.01   | -1.42           | <i>Aldehyde3</i>               | aldehyde dehydrogenase family 3, subfamily A1         |                                                                      |
| NM_001164155 | /NM_013869    | 0.00166157    |               |               | 0.0015411  | -1.16  | -1.32           | -1.42                          | <i>Tnfrsf19</i>                                       | tumor necrosis factor receptor superfamily, member 19                |
| NM_001004468 | /NM_021314    | /NM_003823771 |               |               | 8.26E-04   | -1.15  | -1.35           | -1.42                          | <i>Tacc2</i>                                          | transforming, acidic coiled-coil containing protein 2                |
| NM_009531    |               | 0.00212137    | -1.22         | -1.23         | -1.42      | -1.23  | -1.43           | <i>Xpc</i>                     | xeroderma pigmentosum, complementation group C        |                                                                      |
| NM_007823    |               | 2.45E-04      | -1.01         | -1.02         | -1.43      | -1.02  | -1.43           | <i>Cyp4b1</i>                  | cytochrome P450, family 4, subfamily B, polypeptide 1 |                                                                      |
| NM_009776    | /NM_006498623 |               |               |               | 0.001715   | -1.11  | -1.14           | -1.43                          | <i>Serpin1</i>                                        | serine (or cysteine) peptidase inhibitor, clade G, member 1          |
| NM_001159632 | /NM_133699    | /NM_006515194 |               |               | 2.11E-04   | -1.05  | -1.05           | -1.43                          | <i>Atg16l2</i>                                        | ATPase, H+ transporting, lysosomal V1 subunit C2                     |
| NM_001081039 | /NM_001128307 | /NM_00112828  |               |               | 5.16E-04   | -1.17  | -1.17           | -1.43                          | <i>Dock9</i>                                          | dedicator of cytokinesis 9                                           |
| NM_001253752 | /NM_001253753 | /NM_144842    |               |               | 0.00325849 | -1.10  | -1.12           | -1.43                          | <i>Zmyx5</i>                                          | zinc finger, MYM-type 5                                              |
| NM_009546    |               | 0.00162946    | -1.08         | -1.22         | -1.43      | -1.22  | -1.43           | <i>Trim25</i>                  | tripartite motif-containing 25                        |                                                                      |
| NM_0027707   | /NM_201232    | /NM_006519994 | /NM_001145959 | /NM_00203915  | 0.00155424 | -1.00  | -1.14           | -1.44                          | <i>Nupbl</i>                                          | Nipped-B homolog (Drosophila)                                        |
| NM_001166067 | /NM_006505963 | 3.96E-04      |               |               | 0.00196813 | -1.07  | -1.27           | -1.44                          | <i>Prdm1</i>                                          | PR domain containing 1, with ZNF domain                              |
| NM_007548    | /NM_006512502 | /NM_006512503 |               |               | 0.00177863 | -1.11  | -1.09           | -1.44                          | <i>Syf2</i>                                           | SyF2 homolog, RNA splicing factor (S. cerevisiae)                    |
| NM_001004359 | /NM_001005385 | 1.95E-04      |               |               | 0.00467485 | -1.18  | -1.69           | -1.44                          | <i>Grasp1</i>                                         | G-protein-coupled receptor associated sortin protein 1               |
| NM_003023    | /NM_006506790 |               |               |               | 0.00718086 | -1.00  | -1.13           | -1.45                          | <i>Avl9</i>                                           | AVL9 homolog (S. cerevisiae)                                         |
| NM_019503    | /NM_052991    | /NM_052992    | /NM_1         |               | 0.00394801 | -1.10  | -1.15           | -1.45                          | <i>Fxyd1</i>                                          | FXYD domain-containing ion transport regulator 1                     |
| NM_001243064 | /NM_007616    | /NM_006504974 |               |               | 8.83E-04   | -1.04  | -1.20           | -1.45                          | <i>Cav1</i>                                           | caveolin 1, caveolin protein                                         |
| NM_009978    | /NM_006498658 | /NM_00653252  |               |               | 1.01       | -1.22  | -1.45           | -1.45                          | <i>Cst8</i>                                           | castellan 8 (cystatin-related epididymal spermatogenic)              |
| NM_027852    | /NM_006506623 | /NM_002332313 |               |               | 7.50E-04   | -1.14  | -1.33           | -1.45                          | <i>Rarres2</i>                                        | retinoic acid receptor responder (tazarotene induced) 2              |
| NM_001097617 | /NM_144938    | /NM_006506365 |               |               | 0.00734369 | -1.04  | -1.22           | -1.45                          | <i>C1s1</i>                                           | complement component 1, s subcomponent                               |
| NM_181390    |               | 0.00511664    | 1.03          | -1.17         | -1.46      | -1.17  | -1.46           | <i>Mu2t1</i>                   | musculoskeletal, embryonic nuclear core protein 1     |                                                                      |
| NM_001160319 |               | 0.002522      | -1.13         | -1.17         | -1.46      | -1.17  | -1.46           | <i>Ubr4</i>                    | ubiquitin protein ligase E3 component n-recogin 4     |                                                                      |
| NM_001161731 | /NM_007447    |               |               |               | 0.00190745 | -1.12  | -1.45           | -1.46                          | <i>Ang</i>                                            | angiogenin, ribonuclease, RNase A family, 5                          |
| NM_020259    | /NM_00013622  | 0.001779717   |               |               | 0.00291367 | -1.27  | -1.38           | -1.46                          | <i>Hhip</i>                                           | Hedgehog-interacting protein                                         |
| NM_028127    | /NM_006515977 | /NM_006515978 |               |               | 0.0114941  | -1.05  | -1.13           | -1.46                          | <i>Frmf6</i>                                          | FERM domain containing 6                                             |
| NM_001161775 | /NM_013607    | /NM_006521843 |               |               | 0.00784953 | -1.01  | -1.22           | -1.46                          | <i>Mylh11</i>                                         | myosin, heavy polypeptide 11, smooth muscle                          |
| NM_133187    | /NM_006501984 | /NM_006501985 |               |               | 0.00656879 | -1.05  | -1.15           | -1.47                          | <i>Fom198b</i>                                        | family with sequence similarity 198, member B                        |
| NM_011545    |               | 0.00454961    |               |               | -1.50      | -1.35  | -1.47           | <i>Tcf21</i>                   | transcription factor 21                               |                                                                      |
| NM_025285    |               | 0.00552678    | -1.21         | -1.42         | -1.47      | -1.42  | -1.47           | <i>Srrm2</i>                   | srafin-like 2                                         |                                                                      |
| NM_011076    | /NM_006503555 | /NM_006503556 |               |               | 5.48E-04   | -1.23  | -1.10           | -1.47                          | <i>Abcb1a</i>                                         | ATP-binding cassette, sub-family B (MDR/TAP), member 1A              |
| NM_001131054 | /NM_013911    | /NM_006533515 |               |               | 0.00309395 | -1.01  | -1.15           | -1.47                          | <i>Ptgs1</i>                                          | prostaglandin synthase 1                                             |
| NM_001193666 | /NM_001193667 | /NM_00119366  |               |               | 0.00298848 | -1.12  | -1.16           | -1.48                          | <i>Cd21a</i>                                          | chemokine (C-C motif) ligand 21A [serine]//chemokine (C-C motif      |
| NM_011125    | /NM_006498952 |               |               |               | 0.0073195  | -1.16  | -1.18           | -1.48                          | <i>Pltp</i>                                           | phospholipid transfer protein                                        |
| NM_010570    |               | 0.00392377    | -1.08         | -1.23         | -1.48      | -1.23  | -1.48           | <i>Irs1</i>                    | insulin receptor substrate 1                          |                                                                      |
| NM_00110211  | /NM_013472    | 0.006801735   |               |               | -1.15      | -1.18  | -1.48           | <i>Anxa6</i>                   | annexin A6                                            |                                                                      |
| NM_010681    |               | 0.004714686   | 6.19E-04      | -1.11         | -1.25      | -1.48  | -1.48           | <i>Lama4</i>                   | laminin, alpha 4                                      |                                                                      |
| NM_00103208  |               | 5.25E-04      | -1.16         | -1.16         | -1.48      | -1.16  | -1.48           | <i>Mycopap</i>                 | myocardial zonula adherens protein                    |                                                                      |
| NM_011784    |               | 0.00128085    | 0.005279274   |               | -1.28      | -1.65  | -1.48           | <i>Aplnr</i>                   | apelin receptor                                       |                                                                      |
| NM_009749    |               | 0.00369415    | -1.09         | -1.11         | -1.49      | -1.11  | -1.49           | <i>Bxnl2</i>                   | brain expressed X-linked 2                            |                                                                      |
| NM_054077    | /NM_006529083 | /NM_007509701 |               |               | -1.18      | -1.39  | -1.50           | <i>Prplp</i>                   | proline arginine-rich end leucine-rich repeat         |                                                                      |
| NM_001077398 | /NM_001286348 | /NM_010698    |               |               | 3.89E-04   | -1.10  | -1.35           | -1.50                          | <i>Lad2</i>                                           | LIM domain binding 2                                                 |
| NM_001282000 | /NM_00703129  |               |               |               | 0.00368084 | -1.29  | -1.36           | -1.50                          | <i>Rbl2</i>                                           | retinoblastoma-like 2                                                |
| NM_008580    | /NM_000785419 |               |               |               | -1.19      | -1.25  | -1.51           | <i>Mop3k5</i>                  | mitogen-activated protein kinase kinase kinase 5      |                                                                      |
| NM_009150    |               | 0.00485919    | -1.02         | 1.13          | -1.51      | -1.51  | <i>Selenbp1</i> | selenium binding protein 1     |                                                       |                                                                      |
| NM_001004150 | /NM_0045804   | 0.00477315    |               |               | -1.22      | -1.40  | -1.51           | <i>Adaglt</i>                  | alpha 1.4-galactosyltransferase                       |                                                                      |
| NM_010370    |               | 0.0038162     | 0.007069772   |               | -1.50      | -1.64  | -1.51           | <i>Gzma</i>                    | granzyme A                                            |                                                                      |
| NM_053247    |               | 0.005769849   | -1.00         | -1.57         | -1.56      | -1.35  | -1.51           | <i>Lyme1</i>                   | lymphatic vessel endothelial hyaluronan receptor 1    |                                                                      |
| NM_001113325 | /NM_001252403 | /NM_008165    |               |               | 1.22E-04   | -1.03  | -1.10           | -1.52                          | <i>Gria1</i>                                          | glutamate receptor, ionotropic, AMPA1 (alpha 1)                      |
| NM_011693    |               | 0.00320531    | -1.08         | -1.43         | -1.52      | -1.43  | -1.52           | <i>Vcam1</i>                   | vascular cell adhesion molecule 1                     |                                                                      |
| NM_001083312 | /NM_00410791  |               |               |               | -1.45      | -1.47  | -1.52           | <i>Gbp7</i>                    | glyanlate binding protein 7                           |                                                                      |
| NM_027045    | /NM_028407    | /NM_006519603 | /NM_0027581   |               | -1.03      | -1.30  | -1.52           | <i>Csers2</i>                  | coiled-coil serine rich 2                             |                                                                      |
| NM_173788    | /NM_00033721  | 0.003112879   | 3.50E-04      | -1.23         | -1.28      | -1.52  | <i>Npr2</i>     | natriuretic peptide receptor 2 |                                                       |                                                                      |



| RefSeq       | Transcript ID | p (24h n=460) | p (48h n=657) | p (72h n=805) | FC 24h | FC 48h        | FC 72h                                     | Gene Symbol                                                                                                                                                                         | Gene Title                                                                                                                                                                                                         | Gene Ontology Biological Process                                                                                                                                                     |
|--------------|---------------|---------------|---------------|---------------|--------|---------------|--------------------------------------------|-------------------------------------------------------------------------------------------------------------------------------------------------------------------------------------|--------------------------------------------------------------------------------------------------------------------------------------------------------------------------------------------------------------------|--------------------------------------------------------------------------------------------------------------------------------------------------------------------------------------|
| NM_008306    | /NM_006525667 | 9.89E-04      | 1.76E-04      | -1.24         | -1.54  | -1.52         | <b>Ndst1</b>                               | N-deacetylase/N-sulfotransferase (heparan glucosaminyl) 1                                                                                                                           | 0000165 // MAPK cascade // inferred from mutant phenotype//0000271 // polysaccharide biosynthetic process // inferred from mutant phenotype//0003279 // cardiac septum dev                                         |                                                                                                                                                                                      |
| NM_138741    |               |               | 0.00143162    | -1.06         | -1.17  | -1.52         | <b>Sdpr</b>                                | serum deprivation response                                                                                                                                                          | 0045944 // positive regulation of transcription from RNA polymerase II promoter // not recorded                                                                                                                    |                                                                                                                                                                                      |
| NM_001290541 | /NM_001290543 | 0.005963474   | 3.52E-04      | -1.12         | -1.59  | -1.52         | <b>Acer2</b>                               | alkaline ceramidase 2                                                                                                                                                               | 0001953 // negative regulation of cell-matrix adhesion // not recorded//0006629 // lipid metabolic process // inferred from electronic annotation//0006672 // ceramide metabolic p                                 |                                                                                                                                                                                      |
| NM_001302255 | /NM_001302257 | 0.004129136   |               | -1.02         | -1.30  | -1.52         | <b>Pmp22</b>                               | peripheral myelin protein 22                                                                                                                                                        | 0007049 // cell cycle // inferred from electronic annotation//0007050 // cell cycle arrest // inferred from electronic annotation//0008219 // cell death // not recorded//0008285 //                               |                                                                                                                                                                                      |
| NM_0021398   | /NM_000951896 |               | 0.00471223    | -1.25         | -1.13  | -1.53         | <b>Slc33a3</b>                             | solute carrier family 34, member 3                                                                                                                                                  | 0055083 // transmembrane transport // inferred from electronic annotation                                                                                                                                          |                                                                                                                                                                                      |
| NM_026433    | /NM_000711232 | 0.001134347   | 0.00514138    | -1.38         | -1.51  | -1.53         | <b>Tmem100</b>                             | transmembrane protein 100                                                                                                                                                           | 0001525 // angiogenesis // inferred from mutant phenotype//0001570 // vasculogenesis // inferred from mutant phenotype//0001701 // in utero embryonic development // infer                                         |                                                                                                                                                                                      |
| NM_019707    | /NM_006530627 | 3.36E-04      | 3.62E-05      | -1.13         | -1.36  | -1.53         | <b>Cdh13</b>                               | cadherin 13                                                                                                                                                                         | 0000278 // mitotic cell cycle // inferred from electronic annotation//0001558 // regulation of cell growth // inferred from electronic annotation//0001938 // positive regulation of e                             |                                                                                                                                                                                      |
| NM_001081337 | /NM_006531024 | 0.006770804   | 0.00196578    | -1.08         | -1.28  | -1.53         | <b>Sipa12</b>                              | signal-induced proliferation-associated 1 like 2                                                                                                                                    | 004354 // positive regulation of GTPase activity // inferred from electronic annotation//0051056 // regulation of small GTPase mediated signal transduction // inferred from electro                               |                                                                                                                                                                                      |
| NM_001109661 | /NM_0075211   | 0.006537666   | 0.00289919    | -1.15         | -1.30  | -1.54         | <b>Bach2</b>                               | BTB and CNC homology 2                                                                                                                                                              | 0000122 // negative regulation of transcription from RNA polymerase II promoter // inferred from direct assay//0006351 // transcription, DNA-templated // inferred from electronic                                 |                                                                                                                                                                                      |
| NM_001029836 | /NM_001287101 | 0.007688779   | 0.00403771    | -1.22         | -1.48  | -1.54         | <b>Npnt</b>                                | nephroctinin                                                                                                                                                                        | 0001657 // ureteric bud development // inferred from mutant phenotype//0001658 // branching involved in ureteric bud morphogenesis // inferred from mutant phenotype//0007                                         |                                                                                                                                                                                      |
| NM_025809    |               |               | 0.00619041    | -1.35         | -1.12  | -1.54         | <b>Clec4A</b>                              | C-type lectin domain family 14, member a                                                                                                                                            |                                                                                                                                                                                                                    |                                                                                                                                                                                      |
| NM_001025613 | /NM_000480264 | 0.004081433   | 1.98E-04      | -1.35         | -1.42  | -1.54         | <b>Otu4b</b>                               | OTU domain containing 7b                                                                                                                                                            | 0000122 // negative regulation of transcription from RNA polymerase II promoter // inferred from direct assay//0000122 // negative regulation of transcription from RNA polymeras                                  |                                                                                                                                                                                      |
| NM_019740    | /NM_006512806 | 1.94E-04      | 1.02          | -1.37         | -1.54  | <b>Foxo3</b>  | forkhead box O3                            | 0000122 // negative regulation of transcription from RNA polymerase II promoter // not recorded//0001542 // ovulation from ovarian follicle // inferred from mutant phenotype//C    |                                                                                                                                                                                                                    |                                                                                                                                                                                      |
| NM_001042634 | /NM_009095    | 0.004129136   | 0.00685503    | -1.05         | -1.30  | -1.54         | <b>Cbl1</b>                                | CDC-like kinase 1                                                                                                                                                                   | 0006468 // protein phosphorylation // inferred from electronic annotation//0016310 // phosphorylation // inferred from electronic annotation//0018105 // peptidyl serine phosph                                    |                                                                                                                                                                                      |
| NM_010680    | /NM_000178259 | 3.29E-04      | 0.00205006    | -1.33         | -1.65  | -1.54         | <b>Lama3</b>                               | laminin, alpha 3                                                                                                                                                                    | 0007155 // cell adhesion // inferred from electronic annotation//0016337 // single organism cell-cell adhesion // not recorded//0030155 // regulation of cell adhesion // inferred f                               |                                                                                                                                                                                      |
| NM_010231    | /NM_006496662 | 0.006496663   | 6.95E-04      | -1.05         | -1.16  | -1.55         | <b>Fmo1</b>                                | flavin containing monoxygenase 1                                                                                                                                                    | 0006082 // organic acid metabolic process // not recorded//0006970 // response to osmotic stress // inferred from electronic annotation//0009404 // toxin metabolic process // nc                                  |                                                                                                                                                                                      |
| NM_010612    | /NM_011240817 |               | 0.00352878    | -1.03         | -1.24  | -1.55         | <b>Kdr</b>                                 | kinase insert domain protein receptor                                                                                                                                               | 0001525 // angiogenesis // inferred from electronic annotation//0015451 // ovarian follicle development // inferred from mutant phenotype//0001570 // vasculogenesis // infer                                      |                                                                                                                                                                                      |
| NM_001142916 | /NM_0119161   | 0.002469924   | 5.45E-05      | -1.08         | -1.55  | -1.55         | <b>Plod2</b>                               | procollagen lysine, 2-oxoglutarate 5-dioxygenase 2                                                                                                                                  | 0001666 // response to hypoxia // inferred from electronic annotation//0032870 // cellular response to hormone stimulus // inferred from electronic annotation//0055114 // oxid                                    |                                                                                                                                                                                      |
| NM_001285833 | /NM_001285833 | 0.0015760     | 0.00468835    | -1.28         | -1.17  | -1.56         | <b>Nov4</b>                                | NADPH oxidase 4                                                                                                                                                                     | 0000902 // cell morphogenesis // inferred from mutant phenotype//0001666 // response to hypoxia // inferred from electronic annotation//0006801 // superoxide metabolic proc                                       |                                                                                                                                                                                      |
| NM_024288    | /NM_000249365 |               | 8.01E-05      | -1.21         | -1.34  | -1.56         | <b>Rmnd5a</b>                              | required for meiotic nuclear division 5 homolog A (S. cerevisiae)                                                                                                                   |                                                                                                                                                                                                                    |                                                                                                                                                                                      |
| NM_181414    | /XR_385       | 0.00975831    | -1.30         | -1.30         | -1.57  | <b>Pik3c3</b> | phosphoinositide-3-kinase, class 3         | 0000045 // autophagosome assembly // not recorded//0000910 // cytokinesis // not recorded//0006468 // protein phosphorylation // inferred from mutant phenotype//0006897            |                                                                                                                                                                                                                    |                                                                                                                                                                                      |
| NM_172479    |               | 6.31E-04      | 0.00349072    | -1.04         | -1.81  | -1.57         | <b>Slc38a5</b>                             | solute carrier family 38, member 5                                                                                                                                                  | 0003333 // amino acid transmembrane transport // not recorded//0015804 // neutral amino acid transport // not recorded//0015816 // glycine transport // not recorded                                               |                                                                                                                                                                                      |
| NM_018738    |               | 0.00516403    | -1.66         | -1.55         | -1.58  | <b>Igtp</b>   | interferon gamma induced GTPase            | 0035458 // cellular response to interferon-beta // inferred from direct assay                                                                                                       |                                                                                                                                                                                                                    |                                                                                                                                                                                      |
| NM_133670    | /NM_006507538 | 0.0011241719  | 0.0013462     | -1.08         | 1.20   | -1.59         | <b>Sut1a1</b>                              | sulfotransferase family 1A, phenol-prefering, member 1                                                                                                                              | 0006584 // catecholamine metabolic process // not recorded//0006629 // lipid metabolic process // inferred from electronic annotation//0006805 // xenobiotic metabolic process,                                    |                                                                                                                                                                                      |
| NM_001122733 | /NM_000951896 | 4.47E-04      | 0.003857236   | -1.39         | -1.49  | -1.59         | <b>Kit</b>                                 | kit oncogene                                                                                                                                                                        | 0000187 // activation of MAPK activity // not recorded//0001541 // ovarian follicle development // inferred from mutant phenotype//0002318 // myeloid progenitor cell differentia                                  |                                                                                                                                                                                      |
| NM_001081433 | /NM_006496070 | 0.006496071   | 5.05E-04      | -1.09         | -1.24  | -1.59         | <b>Ankrd44</b>                             | ankyrin repeat domain 44                                                                                                                                                            | 0001843 // neural tube closure // not recorded//0006606 // protein import into nucleus // not recorded//0031398 // positive regulation of protein ubiquitination // not recorded//                                 |                                                                                                                                                                                      |
| NM_001033217 | /NM_000991441 | 0.00991441    | 0.00119568    | -1.38         | -1.29  | -1.60         | <b>Prickle1</b>                            | prickle homolog 1 (Drosophila)                                                                                                                                                      | 0007165 // signal transduction // inferred from electronic annotation//0010811 // positive regulation of cell-substrate adhesion // inferred from direct assay//0019800 // peptide cr                              |                                                                                                                                                                                      |
| NM_052994    | /NM_006514347 | 0.006514347   | 4.21E-05      | -1.16         | -1.15  | -1.60         | <b>Spock2</b>                              | sparc/osteonectin, cvc and kazal-like domains proteoglycan 2                                                                                                                        | 0001504 // neurotransmitter uptake // inferred from mutant phenotype//0002026 // regulation of the force of heart contraction // inferred from mutant phenotype//0002087 // re                                     |                                                                                                                                                                                      |
| NM_178405    |               |               | 0.00288794    | -1.22         | -1.27  | -1.60         | <b>Atp1a2</b>                              | ATPase, Na <sup>+</sup> /K <sup>+</sup> -transporting, alpha 2 polypeptide                                                                                                          | 0031032 // actomyosin structure organization // inferred from electronic annotation                                                                                                                                |                                                                                                                                                                                      |
| NM_001001980 | /NM_001256122 | 0.00650417    | 6.47E-04      | -1.15         | -1.32  | -1.61         | <b>Limch1</b>                              | LIM and calponin homology domains 1                                                                                                                                                 |                                                                                                                                                                                                                    |                                                                                                                                                                                      |
| NM_001002900 | /NM_000200764 | 0.00200764    | 0.00108225    | -1.43         | -1.32  | -1.61         | <b>Higd1c</b>                              | HIG1 domain family, member 1C//methyltransferase hypoxia indi                                                                                                                       | 0000278 // methylation // not recorded                                                                                                                                                                             |                                                                                                                                                                                      |
| NM_153145    | /NM_006533061 | 0.005519043   | 0.00152682    | -1.16         | -1.42  | -1.62         | <b>Abca8a</b>                              | ATP-binding cassette, sub-family A (ABC1), member 8a                                                                                                                                | 0006810 // transport // inferred from electronic annotation//0006869 // lipid transport // not recorded//0008152 // metabolic process // inferred from electronic annotation//000                                  |                                                                                                                                                                                      |
| NM_001172424 | /NM_000445186 | 0.00445186    | 1.41E-04      | -1.22         | -1.23  | -1.63         | <b>Dhrs3</b>                               | dehydrogenase/reductase (SDR family) member 3                                                                                                                                       | 0001523 // retinoid metabolic process // inferred from mutant phenotype//0003151 // outflow tract morphogenesis // inferred from mutant phenotype//0008152 // metabolic pro                                        |                                                                                                                                                                                      |
| NM_010260    |               | 2.75E-04      | 0.005782543   | -1.49         | -1.65  | -1.63         | <b>Gbp2</b>                                | guanlylate binding protein 2                                                                                                                                                        | 0008152 // metabolic process // inferred from electronic annotation//0035458 // cellular response to interferon-beta // inferred from direct assay//0042832 // defense response to                                 |                                                                                                                                                                                      |
| NM_010358    | /NM_006501017 | 0.006501017   | 0.00528406    | -1.03         | -1.22  | -1.63         | <b>Gstm1</b>                               | glutathione S-transferase, mu 1                                                                                                                                                     | 0006749 // glutathione metabolic process // not recorded//0008152 // metabolic process // inferred from electronic annotation//0035690 // cellular response to drug // inferred fr                                 |                                                                                                                                                                                      |
| NM_019440    |               | 0.00668344    | -1.77         | -1.51         | -1.63  | <b>Irgm2</b>  | immunity-related GTPase family M member 2  | 0034341 // response to interferon-gamma // inferred from direct assay//0034341 // response to interferon-gamma // inferred from mutant phenotype//0042742 // defense respon         |                                                                                                                                                                                                                    |                                                                                                                                                                                      |
| NM_001143689 | /NM_023124    | 0.007648      | 0.00373648    | -1.46         | -1.23  | -1.64         | <b>H2-Q4</b>                               | H2-Q4//H2-Q6//H2-Q8//LOC6                                                                                                                                                           | 0002474 // antigen processing and presentation of peptide antigen via MHC class II // not recorded//0006955 // immune response // inferred from electronic annotation//0013882 //                                  |                                                                                                                                                                                      |
| NM_001308489 | /NM_010216    | 0.00528700    | 0.00197627    | -1.04         | -1.23  | -1.64         | <b>Fgf1</b>                                | c-fos induced growth factor                                                                                                                                                         | 0001525 // angiogenesis // inferred from electronic annotation//0001666 // response to hypoxia // inferred from electronic annotation//0007275 // multicellular organismal develo                                  |                                                                                                                                                                                      |
| NM_001316728 | /NM_00180348  | 0.00225299    | -1.28         | -1.26         | -1.64  | <b>Rn167</b>  | ring finger protein 167                    | 0000209 // protein polyubiquitination // not recorded//001567 // protein ubiquitination // inferred from electronic annotation//0045786 // negative regulation of cell cycle // not |                                                                                                                                                                                                                    |                                                                                                                                                                                      |
| NM_177231    | /NM_178220    | 0.00531968    | -1.21         | -1.11         | -1.65  | <b>Arv1</b>   | arrestin, beta 1                           | 0000187 // activation of MAPK activity // not recorded//0001933 // negative regulation of protein phosphorylation // not recorded//0001934 // positive regulation of protein phosph |                                                                                                                                                                                                                    |                                                                                                                                                                                      |
| NM_001284392 | /NM_001284394 | 0.007575203   | 0.00727098    | -1.13         | -1.35  | -1.66         | <b>4-Sep</b>                               | sepin 4                                                                                                                                                                             | 0007049 // cell cycle // inferred from electronic annotation//0007286 // spermatid development // inferred from mutant phenotype//0007420 // brain development // inferred fr                                      |                                                                                                                                                                                      |
| NM_001081346 | /NM_133244    | 0.00513290    | 0.00125755    | -1.15         | -1.22  | -1.67         | <b>Rtkn2</b>                               | rosetin 2                                                                                                                                                                           | 0008284 // positive regulation of cell proliferation // inferred from direct assay//0030097 // hemopoiesis // inferred from direct assay                                                                           |                                                                                                                                                                                      |
| NM_001312918 | /NM_010145    | 1.21E-04      | 0.00408213    | -1.13         | -1.47  | -1.67         | <b>Ephx1</b>                               | epoxide hydrolase 1, microsomal                                                                                                                                                     | 0006725 // cellular aromatic compound metabolic process // inferred from mutant phenotype//0009636 // response to toxic substance // inferred from electronic annotation//001                                      |                                                                                                                                                                                      |
| NM_009421    | /NM_000       | 8.30E-04      | 0.008350425   | -1.56         | -1.45  | -1.68         | <b>Traf1</b>                               | TNF receptor-associated factor 1                                                                                                                                                    | 0006915 // apoptotic process // inferred from electronic annotation//0007165 // signal transduction // inferred from electronic annotation//0042981 // regulation of apoptotic pr                                  |                                                                                                                                                                                      |
| NM_001161420 | /NM_013703    | 0.004043921   | 0.00318838    | -1.21         | -1.36  | -1.68         | <b>Vldlr</b>                               | very low density lipoprotein receptor                                                                                                                                               | 0000122 // negative regulation of transcription from RNA polymerase II promoter // inferred from mutant phenotype//0001666 // response to hypoxia // inferred from electronic an                                   |                                                                                                                                                                                      |
| NM_019919    | /NM_206958    | 0.00524348    | 0.00751087    | -1.13         | -1.21  | -1.68         | <b>Ltbp1</b>                               | latency transforming growth factor beta binding protein 1                                                                                                                           | 0003281 // ventricular septum development // inferred from mutant phenotype//0007179 // transforming growth factor beta receptor signaling pathway // traceable outer stater                                       |                                                                                                                                                                                      |
| NM_001136059 | /NM_009992    | 0.009992      | 1.94E-04      | -1.02         | -2.58  | -1.70         | <b>Cyp1a1</b>                              | cytochrome P450, family 1, subfamily a, polypeptide 1                                                                                                                               | 0001666 // response to hypoxia // inferred from electronic annotation//0001889 // liver development // inferred from electronic annotation//0006778 // porphyrin-containing cor                                    |                                                                                                                                                                                      |
| NM_023785    |               | 0.002648783   | -1.10         | -1.74         | -1.70  | <b>Ppbp</b>   | pro-platelet basic protein                 | 0002523 // leukocyte migration involved in inflammatory response // inferred from mutant phenotype//0002690 // positive regulation of leukocyte chemotaxis // not recorded//00      |                                                                                                                                                                                                                    |                                                                                                                                                                                      |
| NM_029568    | /NM_006534422 | 0.00237378    | -1.23         | -1.53         | -1.75  | <b>Mjpa4</b>  | microfibrillar-associated protein 4        | 0001955 // cell adhesion // inferred from electronic annotation//0009650 // UV protection // not recorded//0010712 // regulation of collagen metabolic process // not recorded//    |                                                                                                                                                                                                                    |                                                                                                                                                                                      |
| NM_029620    |               | 0.0048443     | 0.001332161   | -1.35         | -1.58  | -1.75         | <b>Pcolce2</b>                             | procollagen C-endopeptidase enhancer 2                                                                                                                                              | 001952 // positive regulation of peptidase activity // not recorded                                                                                                                                                |                                                                                                                                                                                      |
| NM_007876    |               | 0.00390525    | 4.74E-05      | -1.21         | -1.06  | -1.75         | <b>Dpep1</b>                               | dipeptidase 1 (renal)                                                                                                                                                               | 0006508 // proteolysis // inferred from electronic annotation//0016999 // antibiotic metabolic process // not recorded//0030336 // negative regulation of cell migration // not rec                                |                                                                                                                                                                                      |
| NM_019521    |               |               | 1.74E-04      | -1.11         | -1.29  | -1.75         | <b>Gas6</b>                                | growth arrest specific 6                                                                                                                                                            | 0001764 // neuron migration // inferred from genetic interaction//0001934 // positive regulation of protein phosphorylation // not recorded//0001961 // positive regulation of cyt                                 |                                                                                                                                                                                      |
| NM_008720    |               | 0.00173486    | 0.008053107   | -1.49         | -1.69  | -1.75         | <b>Npc1</b>                                | Niemann-Pick type C1                                                                                                                                                                | 0006486 // protein glycosylation // inferred from direct assay//0006486 // protein glycosylation // not recorded//0006629 // lipid metabolic process // inferred from electronic an                                |                                                                                                                                                                                      |
| NM_008278    |               |               | 5.77E-04      | 1.05          | -1.07  | -1.78         | <b>Hpgd</b>                                | hydroxyprostaglandin dehydrogenase 15 (NAD)                                                                                                                                         | 0006629 // lipid metabolic process // inferred from electronic annotation//0006631 // fatty acid metabolic process // inferred from electronic annotation//0006693 // prostaglandin                                |                                                                                                                                                                                      |
| NM_023755    | /NM_000       | 4.04E-04      | 0.001339916   | -1.33         | -1.28  | -1.79         | <b>Tfcp2l1</b>                             | transcription factor CP2-like 1                                                                                                                                                     | 0000122 // negative regulation of transcription from RNA polymerase II promoter // inferred from direct assay//0000902 // cell morphogenesis // inferred from mutant phenotype//                                   |                                                                                                                                                                                      |
| NM_008986    | /NM_011248817 | 0.006829428   | -1.07         | -1.32         | -1.82  | <b>Ptj1</b>   | polymerase I and transcript release factor | 0006351 // transcription, DNA-templated // inferred from electronic annotation//0006353 // DNA-templated transcription, termination // inferred from electronic annotation//000     |                                                                                                                                                                                                                    |                                                                                                                                                                                      |
| NM_011134    | /NM_006505011 | 0.004530125   | 8.47E-05      | -1.03         | -1.30  | -1.82         | <b>Pon1</b>                                | paraoxonase 1                                                                                                                                                                       | 0006470 // protein dephosphorylation // inferred from electronic annotation//0006470 // protein dephosphorylation // inferred from electronic annotation//0006629 // lipid metabolic process // inferred from elec |                                                                                                                                                                                      |
| NM_001077364 | /NM_010286    | 0.001384441   | 0.00122274    | 1.13          | -1.35  | -1.82         | <b>Tsc2d3</b>                              | TSC22 domain family, member 3                                                                                                                                                       | 0000122 // negative regulation of transcription from RNA polymerase II promoter // inferred from direct assay//0006355 // regulation of transcription, DNA-templated // inferred fr                                |                                                                                                                                                                                      |
| NM_013691    | /NM_000       | 7.70E-05      | 8.99E-06      | 4.66E-05      | -1.65  | -2.19         | <b>Thbs3</b>                               | thrombospondin 3                                                                                                                                                                    | 0003417 // growth plate cartilage development // inferred from genetic interaction//0003417 // growth plate cartilage development // inferred from mutant phenotype//0007155 //                                    |                                                                                                                                                                                      |
| NM_008030    |               |               | 1.09E-04      | -1.03         | -1.16  | -1.85         | <b>Fmo3</b>                                | flavin containing monoxygenase 3                                                                                                                                                    | 0017144 // drug metabolic process // not recorded//0055114 // oxidation-reduction process // not recorded                                                                                                          |                                                                                                                                                                                      |
| NM_009654    |               | 0.00391393    | 0.002279399   | -1.67         | -1.83  | -1.87         | <b>Alb</b>                                 | albumin                                                                                                                                                                             | 0001895 // retina homeostasis // inferred from electronic annotation//0006810 // transport // inferred from electronic annotation//0009267 // cellular response to starvation // nc                                |                                                                                                                                                                                      |
| NM_023617    | /NM_000468122 | 0.00468122    | 1.80E-04      | -1.25         | -1.15  | -1.88         | <b>Aox3</b>                                | aldehyde oxidase 3                                                                                                                                                                  | 0055114 // oxidation-reduction process // inferred from electronic annotation                                                                                                                                      |                                                                                                                                                                                      |
| NM_020052    |               | 0.00325367    | 1.90E-04      | -1.33         | -1.79  | -1.92         | <b>Scube2</b>                              | signal peptide, CUB domain, EGF-like 2                                                                                                                                              |                                                                                                                                                                                                                    |                                                                                                                                                                                      |
| NM_009245    |               | 0.00709003    | 0.007495557   | 0.00443722    | -1.73  | -1.82         | -1.95                                      | <b>Serpina1c</b>                                                                                                                                                                    | serine (or cysteine) peptidase inhibitor, clade A, member 1C                                                                                                                                                       | 0010466 // negative regulation of peptidase activity // inferred from electronic annotation//0010951 // negative regulation of endopeptidase activity // not recorded//0034097 // n  |
| NM_001039181 | /NM_00011588  | 1.43E-04      | 0.00108739    | -1.93         | -2.82  | -2.10         | <b>Npp3</b>                                | natriuretic peptide receptor 3                                                                                                                                                      | 0001501 // skeletal system development // inferred from direct assay//0001501 // skeletal system development // inferred from mutant phenotype//0002158 // osteoclast prolifer                                     |                                                                                                                                                                                      |
| NM_026481    | /NM_006531324 | 0.003040487   | 0.00441058    | -1.28         | -1.59  | -2.18         | <b>Tpp3</b>                                | thymulin polymerization-promoting protein family member 3                                                                                                                           | 0001578 // microtubule bundle formation // not recorded//0046785 // microtubule polymerization // inferred from electronic annotation                                                                              |                                                                                                                                                                                      |
| NM_011458    |               | 0.00583808    | 0.003455335   | -2.08         | -2.18  | -2.22         | <b>Serpina3k</b>                           | serpin (or cysteine) peptidase inhibitor, clade A, member 3K                                                                                                                        | 0010466 // negative regulation of peptidase activity // inferred from electronic annotation//0010951 // negative regulation of endopeptidase activity // not recorded//0034097 // n                                |                                                                                                                                                                                      |
| NM_008343    | /NM_000       | 0.00213245    | 6.28E-08      | 1.21E-05      | -1.68  | -3.30         | -3.86                                      | <b>Igfhr3</b>                                                                                                                                                                       | insulin-like growth factor binding protein 3                                                                                                                                                                       | 0001558 // regulation of cell growth // inferred from genetic interaction//0001649 // osteoblast differentiation // inferred from expression pattern//0001933 // negative regulation |
| NM_001045550 | /NM_000       | 8.88E-04      | 8.61E-05      | -6.62         | -11.08 | -23.14        | <b>Gm2083</b>                              | Gm2083//Gm21320//Mup1// major urinary protein LOC100048885//predicted gene, 21320//h                                                                                                | 0006112 // energy reserve metabolic process // inferred from sequence or structural similarity//0006112 // energy reserve metabolic process // inferred from direct assay//000681                                  |                                                                                                                                                                                      |

Table S2. Top 50 chemical drugs among upstream modulators of O3-responsive transcriptome (24-72 hr) suggestive to be therapeutic targets for O3 toxicity.

© 2000-2017 QIAGEN. All rights reserved.

| Upstream Regulator                  | Molecule Type                                                         | Predicted Activation State | Activation z-score | p-value of overlap | Target molecules in dataset                                                                                                                                                                                                                                                                                                                                                                                                                                                                                                                                                                                                                                                                                                                                                                                                                                                                                                                                                                                                                                                                                                                                                                                                                                                                                                                                                                                              |
|-------------------------------------|-----------------------------------------------------------------------|----------------------------|--------------------|--------------------|--------------------------------------------------------------------------------------------------------------------------------------------------------------------------------------------------------------------------------------------------------------------------------------------------------------------------------------------------------------------------------------------------------------------------------------------------------------------------------------------------------------------------------------------------------------------------------------------------------------------------------------------------------------------------------------------------------------------------------------------------------------------------------------------------------------------------------------------------------------------------------------------------------------------------------------------------------------------------------------------------------------------------------------------------------------------------------------------------------------------------------------------------------------------------------------------------------------------------------------------------------------------------------------------------------------------------------------------------------------------------------------------------------------------------|
| calcitriol                          | chemical drug                                                         | Inhibited                  | -4.214             | 1.60E-24           | ABCB1,ACADS5,Acps,ADCY9,ALB,ANGPT2,ANLN,AREG,ARGHEF3,BCL2L1,BCL3,BIRC5,BUB1B,CCL20,CCNA2,CCNE1,CD14,CD20,CD36,CDCA5,CDK1,CDKN1A,CDT1,CEBPB,CEBPD,CENPA,CENPQ,CESE1,CHTF18,CTSK,CXCL10,CYP1A1,CYR61,DCTPP1,DUSP10,ECT2,EDN1,ERBB2,ERBB3,ETV5,F3,FASN,FDPS,FDX1,FIGLN1,FN1,GADD45G,GATA3,GLRX,GRK5,GRK6,HBEFG,HK2,Hmg2 (includes others),HPGD,JD2,IGFBP3,IL18,IL1L1R,IL1RN,IL6,INCEP,ITGAX,KIF20A,KIF23,KPNA2,KRT23,LCN2,LGALS1,LIG1,LPAR1,LTBP1,MAD2L1,MAL,MCM2,MCM3,MCM5,MCM7,MEK1,MYC,MYD88,NCAPD2,NDC1,NOX4,NRM,NUSAP1,PBK,PC,PCNA,PDE9A,POLE,POLE2,PRC1,PTGS2,PTRF,RAB32,RACGAP1,RAD51,RRM2,S100A8,S100A9,S100G,SDSL,SERPINA1,SLC16A1,SLC25A36,SOC35,SPP1,STMN1,TCF19,THBD,THBS1,TK1,TLR2,TMEM100,TPX2                                                                                                                                                                                                                                                                                                                                                                                                                                                                                                                                                                                                                                                                                                                |
| dexamethasone                       | chemical drug                                                         |                            | -1.744             | 1.65E-22           | AACS,ABCB1,ACADM,ACOT7,Acps,ACTG1,ADAMTS1,ADRB3,Akr1c14,ALB,ANGPT4,ANXA1,APLN,AREG,ARL4C,ARRB1,ATF4,ATN1,AXIN2,B4GALT4,BCKDHA,BCL2L1,BHLHE40,BIRC3,BIRC5,C8orf4,CASP6,CAV1,CCL17,Ccl2,CCL20,CCNA2,CCND2,CCNE1,CCR1,CD74,CDKN1A,CEBPB,CEBPD,CESE1,CHI3L1,CLEC7A,CNN3,CP,CRYAB,CTGF,CTSK,CUL1,CXCL10,CXCL14,CYP1A1,CYP251,CYP3A5,CYP51A1,CYR61,DAPK1,DCNT6,DUSP10,DUSP16,DUT,ECT2,EDN1,EGR2,EIF1AX,ELOVL1,EPB41L4B,EREGL,ETV5,F3,FASN,FBN1,FOX1,FGF7,FMO1,FN1,FOSL1,FOXO3,FOXQ1,FST,GAB1,GAL,GAS6,GATA3,GBP2,GCLC,GIA1,GPX1,GRK5,GSTM5,GZMA,HBEFG,HERPUD1,HLA-A,HMMGR,HNRNPAB,HOMER2,HSD11B1,HSPH1,JD2,JFT1B1,JFRD1,IGFBP2,IGFBP3,IL18,IL1B,IL1RN,IL13,IL4R,IL6,ILF2,IRS1,IRS2,JVD,JUNB,KOR,KIF4A,KIT,KHLH24,KPNA2,KRT7,KRT8,LAMA2,LAMA3,LAMA4,LCN2,LDHA,LDLR,LGALS1,LGALS2,LPAR1,LRRC8A,LSS,LTB,LTBP2,LVVE1,MAP3K5,MARCO,MAT1A,MAT2A,MATN4,ME1,MFAP5,MFGE8,MIF,MXIP,MMP12,MMP14,MMP2,MMP9,MS4A1,Mt1,Mt2,MVK,M/C,N4BP2L1,NFIL3,NPR2,NPR3,NR3C1,NREP,NUF2,P2RY2,P4HA2,PC,PKD2,PER1,PHLDA1,PLDOD2,POU2AF1,PPA1,Ppdp,PRELP,PRSS8,PTGES,PTGS1,PTGS2,RACGAP1,RASD1,RBL2,RCAN1,RG52,ROSA,S100A8,S100A9,S100G,Saa3,SCD,SDPR,SELE,SELL,SERPINA1,SERPINA3,SERPINE1,SESN1,SLC25A5,SLC2A3,SLC40A1,SLC4A1,SMARCD2,SOC35,SOD2,SPARC,SPOCK2,SPP1,SRF,SRM,SULF2,Suit1a1,TFFI2,TFR2,TGFB1,THBD,THBS1,TIMP1,TIMP2,TK1,TLR2,TMPRSS4,TNC,TNFAIP2,TNFRSF19,Tnfrsf9,TP2A,TRAF1,TRRAP,TSC22D3,TSPAN2,TSPY14,UBE2C,VCAM1,VMPI1,XRCC5,ZFPM1,ZNF704 |
| dextran sulfate                     | chemical drug                                                         |                            | 0.77               | 9.83E-19           | ADAMTS1,ADORA2B,ANLN,AURKA,BIRC5,BUB1,BUB1B,Ccl2,CCNA2,CCNF,CD14,CD74,CD20,CDCA3,CDCA5,CDK1,CHTF18,CKS1B,CTGF,E2F8,ERCC6,FGF1,FIGLN1,GSTM5,JFT1B1,IL18,IL1B,IL6,MCM3,MC M5,MCM6,MKI67,MMP14,MMP2,MMP9,MNS1,MYC,MYLK,NCAPD2,NDS1,NUSAP1,OSMR,PCNA,PLK1,POLE,PRC1,PTGS2,RACGAP1,RAD51,RRM2,S100A8,S100A9,Saa3,SERPINE1,SOC35,SP2C5,STMN1,THBS1,TIMP2,TP2A,TPX2,UBE2C,UHRF1,VCAM1                                                                                                                                                                                                                                                                                                                                                                                                                                                                                                                                                                                                                                                                                                                                                                                                                                                                                                                                                                                                                                           |
| PD98059                             | chemical - kinase inhibitor                                           | Inhibited                  | -3.868             | 1.11E-17           | ACOT7,ANGPT2,ANXA1,AREG,ARRB1,ATFS,ATF4,BCL2L1,BIRC5,CAV1,Ccl2,CCL20,CCNA2,CCND2,CCNE1,CCR1,CD14,CD74,CDKN1A,CEBPB,CEBPD,CLU,CTGF,CTSK,CXCL10,CYP1A1,DHRS3,DNMT1,EDN1,EGR2,ERBB2,F3,FBN1,FOXO3,GCLC,GPX2,GSR,H2AFX,HBEFG,JD2,IL1B,KIF20A,KRT18,KRT8,LCN2,LGALS1,MAD2L1,MAP4,MCM3,MFE2C,MMP2,MYC,NFE2L2,NOXA,PCNA,PID1,PLK1,PRC1,PTGS2,PTTG1,Pvr,RAC2,RAD51,RBL2,RRM2,SCN3B,SDCC,SESN1,SFN,SIRT3,SOD2,SPP1,STMN1,TIMP1,TK1,TNFRSF12A,TP2A,TUBB                                                                                                                                                                                                                                                                                                                                                                                                                                                                                                                                                                                                                                                                                                                                                                                                                                                                                                                                                                            |
| doxorubicin                         | chemical drug                                                         |                            | -0.398             | 5.60E-16           | ABCB1,ADAMTS1,ADORA2B,ALB,ANXA1,AREG,ATF3,AURKA,AURKB,BCL2L1,BHLHE40,BIRC3,BIRC5,BMP4,BUB1B,Ccl2,CCNB2,CD14,CDK1,CDKN1A,CENPA,CKAP4,CLDN4,CLU,CP,CTGF,CYR61,DNMT1,EDN1,EIF5A,ELF3,ERBB2,F3,FBN1,FOXO3,GCLC,GPX2,GSR,H2AFX,HBEFG,JD2,IL1B,KIF20A,KRT18,KRT8,LCN2,LGALS1,MAD2L1,MAP4,MCM3,MFE2C,MMP2,MYC,NFE2L2,NOXA,PCNA,PID1,PLK1,PRC1,PTGS2,PTTG1,Pvr,RAC2,RAD51,RBL2,RRM2,SCN3B,SDCC,SESN1,SFN,SIRT3,SOD2,SPP1,STMN1,TIMP1,TK1,TNFRSF12A,TP2A,TUBB                                                                                                                                                                                                                                                                                                                                                                                                                                                                                                                                                                                                                                                                                                                                                                                                                                                                                                                                                                     |
| LY294002                            | chemical - kinase inhibitor                                           | Inhibited                  | -3.879             | 4.22E-15           | ABCB1,ADAMTS1,ADH1C,ATF3,ATF4,AURKA,BCL2L1,BHLHE40,BIRC3,BIRC5,BUB1B,Ccl2,CCNA2,CCND2,CCNE1,CCR1,CD14,CD74,CDKN1A,CEBPB,CKS2,CLDN4,CP,CTGF,CXCL10,CYR61,EGR2,EIF1AX,ERBB3,EREG,F3,FASN,FGF7,FN1,FOSL1,GCLC,GIA1,GRB10,GSR,HBEFG,HERPUD1,HMG82,HMGCR,HMGCS1,IGFBP2,IGFBP3,IL1B,IL1RN,IL6,IRS1,IRS2,JUNB,KLF10,LCN2,MAT2A,ME1,MFE2C,MMP14,MMP2,MMP9,MPP2,MYC,MYH11,NFE2L2,NPTX1,PCNA,PGK1,PHLDA1,PTGS2,PTPN2,PTPRU,RBL2,RF4,SGS2,SCD,SERPINE1,SFN,SLCO1A2,SOC35,SPP1,SQLE,SRF,TFFI2,THBD,THBS1,TLR2,TP2A,TRB2,UBE2C,VCAM1,ZEB1                                                                                                                                                                                                                                                                                                                                                                                                                                                                                                                                                                                                                                                                                                                                                                                                                                                                                             |
| trichostatin A                      | chemical drug                                                         |                            | -0.638             | 1.50E-14           | ABCB1,ADAMTS1,ADAMTS5,ANXA6,ARL6IP1,AURKB,BCL2L1,BMP4,CAP2,Ccl2,CCNA2,CCNB2,CCND2,CD14,CD79B,CD36,CDK1,CDKN1A,CKS1B,CLU,CREBBP,CSF3R,CTPS1,CXCL10,CYP1A1,CYP3A5,CYP4B1,DLA1,DNMT1,DUSP16,ELF3,ERBB2,F3,FASN,FBN1,FOX2,FUT8,GADD45G,GATA3,GCLC,GSN,GSTA3,HLA-DRA,HMGR,HMGCS1,HMGCS2,JD2,IGFBP3,IL1B,IL6,KDR,KIF20A,KIT,LAMA2,LAMA3,LDLR,LEPR,MAP4,MAT1A,MAT2A,MCM3,MCM6,MGST3,MMP9,MVK,MYC,MYH14,NDRG2,NPC1,PCNA,PLCE1,PLK1,PTGRC1,PRDM1,PRSS23,PTGS1,PTGS2,RECK,Retna,SDC1,SDCC,SELE,SIAH2,SFR,STMN1,STMN2,TFFI2,TGM1,THBS1,TIMP1,TIMP2,TK1,TLR2,TNFAIP2,TP2A,VCAM1,ZEB1                                                                                                                                                                                                                                                                                                                                                                                                                                                                                                                                                                                                                                                                                                                                                                                                                                                 |
| bleomycin                           | chemical drug                                                         | Activated                  | 4.062              | 4.07E-14           | ANGPT2,BCL2L1,CCL17,Ccl2,CCL22,CCR1,CDKN1A,CTGF,CTSK,CTSS,CXCL10,FABP1,FN1,FOSL1,FZD6,H2AFX,HBEFG,IL18,IL1B,IL4R,IL6,LNMB1,MAP4,MIF,MMP12,MMP14,MMP2,MMP9,MYC,MYCT1,NDN1,CNA,PTTG1,Retna,S100A4,Saa3,SERPINE1,SPP1,TIMP1,TIMP2,TLR2,UBE2C,UBE2T,UHRF1,WISP1                                                                                                                                                                                                                                                                                                                                                                                                                                                                                                                                                                                                                                                                                                                                                                                                                                                                                                                                                                                                                                                                                                                                                              |
| paclitaxel                          | chemical drug                                                         |                            | 0.857              | 7.45E-13           | ABCB1,ADORA2B,APLN,AREG,ATF3,ATF4,BCL2L1,BHLHE40,BIRC3,BIRC5,CAV1,CD20,CDKN1A,CLU,CRY2,CTGF,CXCL10,CYP1A1,CYP3A5,DNMT1,DUSP10,EEF1E1,EPHA2,EREG,ETV5,FMO3,FOSL1,FOXO3,H2AFX,HBEFG,HLA-A,IGFBP3,IL1B,IL6,ITGA6,KIF20A,MMP9,MYC,NREP,OSMR,PCNA,PHLDA1,PLAUR,PRELP,PTGS2,RAC2,S100A9,SLC2A3,SOD2,SPTLC2,SRF,STMN1,TFFI2,THBD,THBS1,TRAF1,TULP3,UHRF1                                                                                                                                                                                                                                                                                                                                                                                                                                                                                                                                                                                                                                                                                                                                                                                                                                                                                                                                                                                                                                                                        |
| ritonavir                           | chemical drug                                                         |                            | -1.114             | 2.17E-12           | ABCB1,AXIN2,BCL2L1,BIRC5,CCND2,CRYAB,CYP1A1,CYP3A5,DHCR7,ECT2,FDPS,GBP2,HMGR,HMMR,IFRD1,IL1B,IL6,LAMA3,LDLR,ME1,MMP9,MSMO1,MVK,MYC,NUF2,RACGAP1,SCD,SELE,SQLE,TMEM140,TMPRSS4,TSC22D3,VCAM1,XRCC5                                                                                                                                                                                                                                                                                                                                                                                                                                                                                                                                                                                                                                                                                                                                                                                                                                                                                                                                                                                                                                                                                                                                                                                                                        |
| simvastatin                         | chemical drug                                                         |                            | -1.964             | 3.19E-12           | ADAMTS1,ANGPT2,Anp32a,ANXA1,ANXA3,BCL2L1,BIRC5,CCL20,CCND2,CD14,CDKN1A,CTGF,CYR61,EDN1,F3,FABP1,GIA1,HIST1H1C,HMGCR,HS3T1,IGFBP3,IL1B,IL6,ITGB2,KIT,LCN2,LDLR,MKI67,MMP2,MMP9,MPP6,MYC,PON1,PTGS2,RHOA,S100A6,SELE,SERPINE1,SOC35,SPP1,STAT6,THBD,TIMM10,TIMP1,TLR2,VCAM1                                                                                                                                                                                                                                                                                                                                                                                                                                                                                                                                                                                                                                                                                                                                                                                                                                                                                                                                                                                                                                                                                                                                                |
| mibolerone                          | chemical drug                                                         | Activated                  | 4.11               | 3.48E-12           | ALDH3A1,CD74,CDK1,CLTB,CLU,CYP51A1,DHRS3,EIF2S1,ERP29,F3,FDPS,FN1,GADD45G,HMGCS1,IGFBP3,INCEP,ISYNA1,KLF10,LDLR,LRG1,LSS,MAL,MAT2A,MYC,NME1,NME2,PCNA,PGK1,PRELP,SERP1,SLC25A5,SQLE,SRM,STMN1,TGFB1,TK1,TP2A,UCLH5                                                                                                                                                                                                                                                                                                                                                                                                                                                                                                                                                                                                                                                                                                                                                                                                                                                                                                                                                                                                                                                                                                                                                                                                       |
| gefitinib                           | chemical drug                                                         |                            | 0.715              | 3.78E-12           | ADAMTS1,AREG,AURKA,AURKB,BCL2L1,BIRC5,BUB1,Ccl2,CCNE1,CCNF,CD36,CEBPB,CEBPD,CYP2F1,ECT2,FOSL1,FSCN1,GJA1,HSPB1,KIF23,KIT,KRT19,MCM3,MKI67,MMP11,MMP15,NOX4,OSMR,PCNA,PLAUR,PRC1,PTGS2,PTTG1,S100A14,S100A9,SLC2A3,Suit1a1,TIMP2,TLR2,TP2A,TRAF1,VILL                                                                                                                                                                                                                                                                                                                                                                                                                                                                                                                                                                                                                                                                                                                                                                                                                                                                                                                                                                                                                                                                                                                                                                     |
| mifepristone                        | chemical drug                                                         |                            | 1.135              | 5.37E-12           | ABCB1,ANXA1,AREG,ATF3,BCL2L1,CAV1,Ccl2,CD14,CD74,CDKN1A,CEBPB,CEBPD,CHI3L1,CLU,CTGF,CYP3A5,DKK3,DNAJC2,EGR2,EPCAM,F3,FST,GAL,GAS6,GJA1,HBEFG,HPGD,HSD11B1,IGFBP3,IL1B,IL4R,IL6,IRS2,JUNB,KIT,LAMA2,LDLR,MAD2L1,MMP9,Mt1,MYC,NDN,NFE2L2,NME2,NOX4,NR3C1,PC,PCNA,PTGS1,PTGS2,SGS2,S100A6,S100G,Saa3,SERPINE1,SERPINE1,SLCO1B3,SPP1,SRM,TK1                                                                                                                                                                                                                                                                                                                                                                                                                                                                                                                                                                                                                                                                                                                                                                                                                                                                                                                                                                                                                                                                                 |
| U0126                               | chemical - kinase inhibitor                                           | Inhibited                  | -2.22              | 8.65E-12           | ABCB1,ADAMTS4,ADORA2B,ANGPT4,APLN,AREG,ATF3,ATF4,AXIN2,BCL2L1,BHLHE40,BIRC3,BIRC5,CAV1,CCL17,Ccl2,CCND2,CCNE1,CDH5,CDKN1A,CEBPB,CEBPD,CLDN4,CRY2,CTGF,CXCL10,CYP1A1,DP P,DUSP10,EDN1,EEF1E1,EIF1AX,EPHA2,EREG,ETV5,F3,FMO3,FN1,FOSL1,GCLC,GIA1,GRIA1,GSN,HBEFG,HERPUD1,HPGD,IL1B,IL6,ITGA6,JUNB,KDR,KLF10,LDLR,MAT2A,MMP12,MMP2,MMP9,MYC,NREP,C SMR,PER1,PHLDA1,PLAUR,PRELP,PTGS2,RAC2,S100A9,SERPINE1,SLC2A3,SOC35,SPP1,SPRR1A,TFFI2,THBS1,TIMP2,TLR2,TRAF1,TSC22D3,TULP3,VCAM1,WISP1                                                                                                                                                                                                                                                                                                                                                                                                                                                                                                                                                                                                                                                                                                                                                                                                                                                                                                                                   |
| decitabine                          | chemical drug                                                         |                            | -0.508             | 1.25E-11           | ABCB1,ANGPT4,BIRC3,BMP4,CAV1,Ccl2,CCNA2,CCND2,CD79B,CDH13,CDK1,CDKN1A,CHI3L1,CLU,CTGF,CXCL10,CYP1A1,CYP3A5,CYP4B1,DAPK1,DNMT1,FN1,FOXF2,GADD45G,GLRX,GPX1,GSN,HBEFG,HK2,HMGCS2,HMMR,HPGD,HSPA1A/HSPA1B,IGFBP2,IGFBP3,IL1B,IL6,JUNB,KRT18,KRT7,KRT8,LAMA2,LAMA3,LDLR,LEPR,LGALS3,MAT1A,MGST3,MKI67,MMP14,MMP2,MMP9,MYC,NME1,NPTX1,NR3C1,PCNA,PDE9A,PLCE1,PTGS2,RECK,RNASE4,RRAD,SELL,SERPINH1,SFN,SLC2A3,SLCO1B3,SMARCA2,SOC35,SPARC,SPP1,TFFI2,TFR2,TGFB1,THBD,THBS1,TIMP2,TP2A                                                                                                                                                                                                                                                                                                                                                                                                                                                                                                                                                                                                                                                                                                                                                                                                                                                                                                                                          |
| dihydrotestosterone                 | chemical - endogenous mammalian                                       |                            | 1.248              | 3.96E-11           | Acps,ADAMTS1,ADH1C,ADRB3,AREG,AXIN2,BCL2L1,BUB1B,CCNA2,CCND2,CCNE1,CD74,CD20,CD36,CDKN1A,CHI3L1,CLU,CST8,CTGF,CYP4B1,DCTPP1,E2F8,EPB41L4B,ERBB2,FASN,FGF7,FN1,Foxp1,FOX Q1,FST,FZD6,GAS6,GPX3,GRWD1,GSN,HK2,HLA-A,HMGR,HOMER2,HOXA5,HPGD,HSPA1A/HSPA1B,HSPB1,JD2,IGFBP2,IGFBP3,IL6,IRS2,KRT19,LDHA,LDLR,LGALS1,LTBP1,MAFF,MCM5,ME1,MMP2,Mt1,MYC,MYLK,NR3C1,PC,PDE9A,PER1,PFN1,PHF21A,PHLDA1,PTGER4,PTGS2,RARRES2,RASSF9,SCD,SELENBP1,SLC1A3,SLC2A3,SPARC,SPP1,SQLE,STXBP1,TACC2,TALDO1,THBS1,TKT,VCAM1,VLDLR,ZEB1                                                                                                                                                                                                                                                                                                                                                                                                                                                                                                                                                                                                                                                                                                                                                                                                                                                                                                        |
| 3-deoxy-2-octulosonic acid(2)-PPARA | chemical - endogenous non-mammalian ligand-dependent nuclear receptor |                            | 1.387              | 4.09E-11           | Ccl2,CH25H,CXCL10,DHCR7,HMGR,JFT1B1,IL1B,IL6,LSS,PTGES,PTGS1,PTGS2,SQLE                                                                                                                                                                                                                                                                                                                                                                                                                                                                                                                                                                                                                                                                                                                                                                                                                                                                                                                                                                                                                                                                                                                                                                                                                                                                                                                                                  |
|                                     |                                                                       |                            | -0.867             | 4.96E-11           | ACADM,ADRB3,ANGPT4,AURKA,BCL2L1,C1R,C1S,Ccl2,CCNA2,CCNE1,CDK1,CDKN1A,CEBPB,CEBPD,CHKA,CSAD,CYP1A1,CYP51A1,CYP7B1,DHCR7,EDN1,FABP1,FASN,FDPS,H2AFX,HIST1H1C,HMGR,HMG CS1,HMGCS2,Hmg2 (includes others),IGFBP2,IGFBP3,IL1RN,IL6,KIF20A,KIF4A,KRT23,KRT8,LGALS4,LSS,MAD2L1,MAT2A,MGST3,MKI67,MMP9,MSMO1,MVD,MVK,MYC,NFE2L2,NR1D1,PC,PCNA,PHLDA1,PLA2G7,PLK1,PLTP,PMVK,PON 1,PPA1,PRC1,PTGS2,RETSAT,RNF186,SCD,SELENBP1,SORD,SQLE,SRM,TALDO1,TLR2,TP2A,UCLH5,UQCRC1,VCAM1                                                                                                                                                                                                                                                                                                                                                                                                                                                                                                                                                                                                                                                                                                                                                                                                                                                                                                                                                    |

| Upstream Regulator          | Molecule Type                       | Predicted Activation State | Activation z-score | p-value of overlap | Target molecules in dataset                                                                                                                                                                                                                                                                                                                                                                                                                                                                                                                                                                                                                                                                                                                                                                                                                                                                                                                                                                                            |
|-----------------------------|-------------------------------------|----------------------------|--------------------|--------------------|------------------------------------------------------------------------------------------------------------------------------------------------------------------------------------------------------------------------------------------------------------------------------------------------------------------------------------------------------------------------------------------------------------------------------------------------------------------------------------------------------------------------------------------------------------------------------------------------------------------------------------------------------------------------------------------------------------------------------------------------------------------------------------------------------------------------------------------------------------------------------------------------------------------------------------------------------------------------------------------------------------------------|
| phorbol myristate acetate   | chemical drug                       | Activated                  | 2.671              | 5.28E-11           | ABC1,ACOI,ADAMT51,ADAMT54,ADRB3,AKR1B10,ALB,ANGPT2,ANGPT4,ANXA1,AREG,AURKA,AURKB,BCL2L1,BIRC3,BIRC5,CAPG,CAV1,Ccl2,CCL20,CCNA2,CCND2,CCNE1,CCNH,CD14,CD68,CDK1,CDKN1A,CE51,CH25H,CMKP1,CREBBP,CTGF,CXCL10,CYP1A1,CYR61,DBGP,DDP,DNM1,ECM1,EGR2,EIF5A,EPHA2,ERBB2,ERCC6L,F3,FCER1G,FDX1,FGF7,FOSL1,FST,GAL,GATA3,GCLC,GJA1,GK5,HAS1,HBEFG,HLA-DRA,HXA5,HS011B1,ID2,IGFBP2,IGFBP3,IL18,IL1B,IL1RN,IL6,ITGAX,ITGB2,JUNB,KIT,LCN2,LDLR,LEPR,LTB,LVYE1,MMP11,MMP12,MMP14,MMP2,MMP9,MRP12,MYC,NF13,NFKBIE,NME2,NPR3,P2RY2,PCNA,PER1,PKM,PLAUR,PON1,POU2AF1,PRKE,PTGER4,PTGES,PTGS1,PTGS2,RANBP1,RCAN1,Retnla,SGS2,S100A8,S100A9,S100A9,SDC1,SELE,SELL,SERPINA1,SERPINA3,SERPINE1,SLC16A1,SOC3,SOD2,SPARC,SPP1,SPRR1A,TEF,TEKT1,TFPI2,TGM1,THBS1,TIMP1,TK1,TLR2,TNFRSF12A,TRAF1,TRPC1,TSC22D3,TSHB,VCAM1,VLDLR,ZEB1                                                                                                                                                                                                           |
| fulvestrant                 | chemical drug                       | Inhibited                  | -2.716             | 6.31E-11           | ADCY9,AREG,ATF4,AURKA,BIRC5,BMP4,CAV1,Ccl2,CCNA2,CCNE1,CD74,CDC20,CDK1,CDKN1A,CENPF,CHTF18,CXK1B,CLK1,CXCL10,CYR61,ERBB3,GAL,GJA1,H2AFX,ID2,IL1B,IRS1,KLF10,LDLR,LEPR,MCM2,MCM3,MCM5,MCM7,MYC,NME1,PCNA,POLE,PRSS23,PTGS2,PTTG1,RBL2,RFCS,S100G,SHH2,SLC25A5,STMN1,TFRC,TK1,TSC22D3,UBE2C,VCAM1,ZEB1,ZFX                                                                                                                                                                                                                                                                                                                                                                                                                                                                                                                                                                                                                                                                                                               |
| indomethacin                | chemical drug                       | Activated                  | 0.906              | 7.59E-11           | ADAMT51,ADAMT55,ANGPT2,ANXA1,BCL2L1,BIRC3,BIRC5,Ccl2,CD14,CDKN1A,CEBPB,CLDN4,CLU,CP,DDC,ELF3,FASN,FCGR2A,FGF7,GPX2,HAS1,IL1B,IL6,KRTR,LCN2,LDLR,LGALS3,MCM3,MMP12,MMP14,MMP2,MYC,PCNA,PLAUR,Ppbb,PTGER4,PTGES,PTGS1,PTGS2,Pvr,S100A8,SDC1,SELL,SPP1,TFPI2,TIMP1,TNFRSF12A,TUBB,XRCC5                                                                                                                                                                                                                                                                                                                                                                                                                                                                                                                                                                                                                                                                                                                                   |
| nitrofurantoin              | chemical drug                       | Activated                  | 2.152              | 8.19E-11           | ACADM,ACTG1,ADAMT51,ALB,BCL2L1,CASP6,CE51,CLU,CP,CTSS,CXCL10,ERBB2,FABP1,FETUB,FGF7,GPX2,GSR,HMGR,HMGC51,HMGC52,IFRD1,IGFBP3,IL1B,IL6,ITIH4,KRT19,LGALS3,MMP12,MMP14,Mt1,MYC,PCNA,SDC1,SELENBP1,SERPINA1,SPP1,STMN1,TIMP1,TNFRSF12A,TUBB,VCAM1                                                                                                                                                                                                                                                                                                                                                                                                                                                                                                                                                                                                                                                                                                                                                                         |
| gentamicin                  | chemical drug                       | Activated                  | 4.668              | 8.94E-11           | ACADM,ACADS,ASNSD1,ATF3,Ccl2,CDC34,CEBPB,CHKA,CHORDC1,CIPC,CLU,CP,CQ,SPR2,CXCL10,CYP1A1,DDC,DDX39A,DMD,DPEP1,FMO1,GNL3,GSTM5,H2AFX,HSPA1A/HSPA1B,HSPB1,IFRD1,IGFBP3,IL1B,JUNB,KTI12,LCN2,MCM6,MYBBP1A,MYC,NCL,NME1,NOP58,NR1D1,PC,PLIP,PSAT1,Pvr,RPS27L,S100G,SPP1,ST6GALNAC3,Suit1a1,TFRC,TIMP1,TUBB,VCAM1                                                                                                                                                                                                                                                                                                                                                                                                                                                                                                                                                                                                                                                                                                            |
| medroxyprogesterone acetate | chemical drug                       | Inhibited                  | -2.697             | 2.80E-10           | ANGPT2,ANLN,ASPM,BCL2L1,BIRC5,Ccl2,CCNB2,CDK1,CENPF,CXCL10,CYP1A1,CYR61,ERBB2,F3,FASN,FN1,GCH1,HS011B1,HTRA1,IL1B,IL6,ITGB2,JUNB,MCM5,MYC,MYLK,NUSAP1,PKB,PRC1,SCD,SPC25,TFPI2,TNC                                                                                                                                                                                                                                                                                                                                                                                                                                                                                                                                                                                                                                                                                                                                                                                                                                     |
| acetaminophen               | chemical drug                       | Activated                  | 2.716              | 4.16E-10           | ABC1,ACADM,ACO1,ACTG1,ALB,BCKDHA,Ccl2,CCR1,CDKN1A,CE51,CXCL10,CYP3A5,FABP1,GPX1,GSR,HMGR,HMGC51,HMGC52,IFRD1,IGFBP3,IL18,IL1B,IL6,IRS1,KDR,ME1,Mt1,MYC,NDRG2,PCNA,PLAUR,PTGS2,Retnla,SOC3,TUBB,VCAM1                                                                                                                                                                                                                                                                                                                                                                                                                                                                                                                                                                                                                                                                                                                                                                                                                   |
| methylselenic acid          | chemical reagent                    |                            |                    | 5.73E-10           | ADAMT51,ATF3,AURKA,BCL2L1,BIRC3,BIRC5,BMP4,BUB1B,CCNA2,CCNB2,CD20,CD6,CDK1,CDKN1A,CENPA,CENPF,CLU,CORO1A,DUSP10,ELF3,ENPP5,EPHX1,FN1,H1F0,HMMR,HNRNP3J,DI2,JUNB,MCM2,MCM3,MCM5,MCM6,MCM7,MKI67,MYC,NF13,NREP,PCNA,PEG3,PLK1,POLA1,POLE2,PTGES,RFCS,RRM2,SCD,SH3BP5,TLR2,TO2A,ZFX                                                                                                                                                                                                                                                                                                                                                                                                                                                                                                                                                                                                                                                                                                                                       |
| raloxifene                  | chemical drug                       |                            | -0.208             | 6.22E-10           | ADCY9,ANXA3,AREG,BCL3,BMP4,CB6,CDKN1A,CLK1,CLU,CTSH,EDN3,ERBB2,ERBB3,FMO5,HSPA1A/HSPA1B,IFJ0,IL18,IL6,KRT7,LDLR,MFAPS5,MIF,MKI67,MMP2,PCNA,PPP1R3C,PRSS23,PTGS2,PTTG1,RF4,SELENBP1,SERPINE1,SHH2,SPP1,TFRC,THBD,TIMP1,TO2A,ZFX                                                                                                                                                                                                                                                                                                                                                                                                                                                                                                                                                                                                                                                                                                                                                                                         |
| cisplatin                   | chemical drug                       | Activated                  | 2.839              | 7.27E-10           | ACADM,ADAMT51,ALB,ANXA1,ASCC1,ATF3,ATF4,BCL2L1,BIRC3,BIRC5,BMP4,C8orf4,CASP6,CAV1,Ccl2,CCR1,CD14,CDK1,CDKN1A,CHKA,CLDN4,CLIP4,CLU,CP,CTGF,CXCL10,CXCL14,DHRS3,EDN1,ELF3,ERBB3,F3,FADS3,FASN,FBXW7,FCGR2A,FN1,FOSL1,FYN,GPX2,GRIA1,H2AFX,HEYL,HK2,HMGR,HMGC51,ID2,IGFBP3,IL18,IL1B,IL4R,IL6,ISYNA1,ITGA7,KRT19,LCN2,LGALS3,MAT1A,MCM3,MMP2,Mt1,MYC,NEO1,NOX4,NREP,PIDD1,PIK3C3,PLK1,PTGES,Pvr,RAD51,RPS27L,RRM2,SERPINE1,SESN1,SLC25A36,SLC2A3,SOC3,SPP1,STMN1,THBS1,TIMP1,TLA4,TNFRSF12A,TO2A,TUBB,UHRF1,USP3,VCAM1,XPC                                                                                                                                                                                                                                                                                                                                                                                                                                                                                                |
| AGN194204                   | chemical drug                       |                            | 1.306              | 8.40E-10           | ARL4C,ATF3,AURKA,CCNA2,CDK1,CDKN1A,CHKA,CYP51A1,CYP7B1,DENND5A,DHCR7,FDP5,FDX1,Foxp1,GATA3,GBP2,GJA1,H2AFX,HIST1H1,HC2,Hmgn2 (includes others),Jgtp,IL4R,IRS2,ITGB2,KIF20A,KIF4A,LGALS1,LSS,MAD2L1,MKI67,MMP9,MYC,NNSAF,PHLDA1,PLK1,PRC1,SCD,SPP1,TIMP1,TO2A                                                                                                                                                                                                                                                                                                                                                                                                                                                                                                                                                                                                                                                                                                                                                           |
| tretinoin                   | chemical - endogenous mammalian     | Inhibited                  | -3.136             | 8.88E-10           | Acp5,ADAMT55,ALDH3A1,ANGPT4,ANXA1,ANXA6,APCCD1,APLN,APLN,AREG,ATF4,BCL2L1,BCL3,BHLHE40,BIRC3,BIRC5,BMP4,CALM13,CASP6,Ccl2,CCL20,CCL22,CCNA2,CCND2,CCNE1,CCR1,CD14,CD68,CD74,CDC20,CDH5,CDKN1A,CEBPB,CE51,CHKA,CHN2,CX52,CP,CSF3R,CTGF,CTSC,CTSK,CTSS,CXCL10,CYP1A1,CYP251,CYP4B1,CYR61,OHRS3,DMC1,EDN1,ELF3,EPACM,EPHX1,F3,FCER1G,FN1,FOSL1,FOXO3,FST,GJA1,GPX1,GPX2,GRB10,GRIA1,GZMA,HBEFG,HDFG,HLA-A,HMGC52,HXA5,HXB5,HS3T1,HS011B1,HSPB1,ID2,IF44,IGFBP2,IGFBP3,IL1B,IL6,INMT,IRS1,ITGA6,ITGAX,ITGB2,IVD,KCNE4,KDR,KIF23,KIT,KRT18,KRT19,KRT7,LAMA4,LEPR,LGALS1,LRP2,MAP3K5,M,EF2C,MERTK,MGST3,MMP11,MMP14,MMP9,MPP6,MS4A1,Mt1,MTHFD2,MYC,NCL,NCOA5,NFE2L2,NME2,NR3C1,P2RY2,P4HA2,PARP1A,PFN1,PGD,PHLDA1,PIK3C3,PLA2G7,PLAUR,PLCE1,PTGES,PTGS1,PTGS2,PTPRU,RRRES2,RBL2,RF4,RTKN2,S100A8,S100A9,SCD,SELL,SERPINE1,SERPING1,SLC16A1,SLC25A36,SLC38A2,SOX4,SPARC,SPP1,STAT6,TAL1,TB2,TFRC,TGFB1,TGM1,THBD,THBS1,TIMM8A,TIMP1,TK1,TLR2,TNC,TNFAIP2,TNFRSF19,Tnfsf9,TO2A,TSC22D3,TSHB,TYROBP,UBE2C,USP3,VCAM1,VMP1,XRCC5 |
| sirolimus                   | chemical drug                       | Inhibited                  | -3.212             | 1.56E-09           | ACADM,ADSS,ATF4,ATP6V1G1,BCKDHA,BCL2L1,BCL3,BEX1,BIRC5,Ccl2,CCND2,CCNE1,CD68,CDKN1A,CEBPB,DNAJC2,EIF1AX,EIF2S1,ERBB2,ERBB3,F3,FASN,FN1,FSCN1,GATA3,GCLC,GLA,GRIA1,HMGC52,ID2,IL1B,IL4R,IL6,IRS1,IRS2,JUNB,KDR,LCN2,LDHA,LEPR,LGALS3,MMP14,MMP2,MMP9,Mt1,MYC,MYH11,NCL,NR3C1,PCNA,PGK1,PKM,PLAUR,PSM3,S100A8,SCD,SELL,SERPINE1,SPN,SLC25A5,SLC3A3,SOC3,SQLE,STMN1,THBD,TIMP1,TMPD,TO2A,TRIM25,UCK2,VCAM1,VMP1                                                                                                                                                                                                                                                                                                                                                                                                                                                                                                                                                                                                           |
| sulfurafan                  | chemical drug                       |                            | -0.297             | 1.81E-09           | ABC1,AKR1B10,AOX1,BCL2L1,BIRC5,CDKN1A,DDC,DNM1T1,EPHX1,GATA3,GCLC,GPX1,GPX2,GSR,GSTA3,GSTM5,IL1B,IL6,MMP9,Mt1,NFE2L2,PTGES,PTGS2,SELE,SOC3,TAALD01,TKT,TXNRND1,VCAM1,ZEB1                                                                                                                                                                                                                                                                                                                                                                                                                                                                                                                                                                                                                                                                                                                                                                                                                                              |
| deferoxamine                | chemical drug                       |                            | 1.559              | 1.84E-09           | ANGPT2,ANGPT4,APLN,BHLHE40,CCL20,CCND2,CCNE1,CD14,CDKN1A,CP,CYP3A5,DUSP10,DUSP16,ECM1,F3,FASN,HK2,HSPA1A/HSPA1B,IGFBP2,IGFBP3,IL6,ITGB2,KIT,LAMA3,LCN2,LDHA,ME1,MMP2,M546A,MYC,NF13,PGK1,PKM,PLAUR,SELE,SERPINE1,SLC2A3,SPP1,SULF2,TFRC,VCAM1                                                                                                                                                                                                                                                                                                                                                                                                                                                                                                                                                                                                                                                                                                                                                                          |
| epigallocatechin-gallate    | chemical drug                       |                            | -0.646             | 1.98E-09           | ANGPT2,BCL2L1,BIRC5,CASP6,CCL17,CCL22,CDKN1A,CEBPB,CTGF,CTSK,CXCL10,CYR61,DNM1T1,EDN1,ERBB2,F3,FN1,FOSL1,FOXO3,GCLC,GJA1,GSR,IL18,IL1B,IL6,JUNB,KDR,LDLR,MAP3K5,MKI67,MMP2,MMP9,MYC,NFE2L2,PCNA,PRKE,PTGS2,SERPINE1,SLC16A1,TACSTD2,TFRC,TIMP1,TRAF1,VCAM1                                                                                                                                                                                                                                                                                                                                                                                                                                                                                                                                                                                                                                                                                                                                                             |
| SB203580                    | chemical - kinase inhibitor         | Inhibited                  | -2.391             | 2.83E-09           | Acp5,ADAMT54,ADAMT58,ANXA1,ANXA3,ATF3,BDKRB1,BIRC5,BMP4,CCL17,Ccl2,CCL20,CDK1,CDKN1A,CEBPB,CTGF,CTSK,CXCL10,CYP1A1,ERP29,F3,FN1,FPR2,GBP2,GJA1,GLRX,HAS1,IGFBP3,IL18,IL1B,IL1RN,IL6,JUNB,KDR,KRT23,MAT2A,MMP12,MMP9,MYC,MYH11,PLAUR,PTGES,PTGS2,SELE,SERPINE1,SERPING1,SOC3,SOD2,SPARC,SPP1,TGM1,THBS1,TIMP1,TIMP2,TLR2,TRAF1,VCAM1,ZFYVE26                                                                                                                                                                                                                                                                                                                                                                                                                                                                                                                                                                                                                                                                            |
| lovastatin                  | chemical drug                       |                            | 0.868              | 3.94E-09           | ADAMT51,ALB,ATF3,ATF4,BCL2L1,BIRC5,CCNA2,CDKN1A,CTGF,DHCR7,FASN,FDP5,GATA3,GPX3,HMGR,HMGC51,IL1B,IL6,LDLR,MKI67,MPP6,MVD,MVK,MYC,NOX4,PMVK,PTGS2,RRRES2,RHOV,SERPINE1                                                                                                                                                                                                                                                                                                                                                                                                                                                                                                                                                                                                                                                                                                                                                                                                                                                  |
| cyclosporin A               | biologic drug                       |                            | 1.069              | 4.23E-09           | ADORA2B,ANG,ANXA1,ATF3,BCL2L1,BIRC3,CAV1,CD14,CD68,CDKN1A,CLDN4,CLU,CP,CTGF,CYP3A5,EDN1,EGR2,ELF3,F3,FASN,FCGR2A,FN1,FST,FYN,GJA1,GPX2,GZMA,H2AFX,HERPUD1,HMGR,IL1B,IL6,KDR,LAMA3,LCN2,LDLR,LGALS3,LVYE1,MCM3,MDH2,MIF,MMP14,MMP2,MMP9,MYC,MYH11,NDUF86,NFE2NME1,NR3C1,PCNA,PKM,PRKACB,PTGS2,RCAN1,S100A9,SCD,SELE,SELL,SERPINE1,SERPINH1,SHH2,SMPDL3B,SPP1,TFEC,TIMP1,TNFRSF12A,TUBB,VCAM1                                                                                                                                                                                                                                                                                                                                                                                                                                                                                                                                                                                                                            |
| methylprednisolone          | chemical drug                       | Activated                  | 2.046              | 4.41E-09           | Anp32a,ANXA1,ANXA3,C1QBP,Ccl2,CD74,CDH13,CDKN1A,CNN3,CTGF,CTSC,CTSH,CTSS,CYCL1,DGK2,DMD,EPHX1,F3,FBNS5,FBXW7,FCGR2A,FGF7,FN1,GBP2,GCH1,GCLC,GBL3,GNL3,HSPA1A/HSPA1B,HSPH1,IL1B,IL1RN,IL6,JRGM,ITGA7,IVD,KRT19,LAMA3,LDLR,LVYE1,ME1,MMP11,MMP9,Mt1,MVK,MYBBP1A,MYC,NCL,NFE2L2,NME1,NR3C1,PCNA,PGAM1,PIGR,PLAUR,PLIP,PRSS8,PSAT1,RBL2,RG52,SELE,SDC1,SERPINA1,SERPINA3,SERPINE1,SLC16A1,SLC25A10,SLC2A3,SLC40A1,SORD,SPARC,Suit1a1,TACSTD2,TFRC,TLR2,TMEM53,TOMM20,TO2A,TUBA1C,VCAM1,VMP1                                                                                                                                                                                                                                                                                                                                                                                                                                                                                                                                |
| atorvastatin                | chemical drug                       |                            | 1.525              | 4.69E-09           | ABC1,BCL2L1,C8orf4,CAV1,Ccl2,CTGF,CYP51A1,CYR61,DHCR7,DMC1,EDN1,ELF3,F3,FDP5,GJA1,GSR,HMGR,HMGC51,IL6,ITGB2,JUNB,LDLR,LSS,MMP2,MMP9,MSMO1,MVD,MVK,NOX4,PMVK,PTGS2,RH,EB,SELE,SERPINE1,SLC10B3,SPP1,SQLE,TLR2,VCAM1                                                                                                                                                                                                                                                                                                                                                                                                                                                                                                                                                                                                                                                                                                                                                                                                     |
| allopurinol                 | chemical drug                       | Activated                  | 2.488              | 5.45E-09           | ADAMT51,ANXA1,BIRC3,CD14,CLDN4,CLU,CP,CXCL10,ELF3,FABP1,FCGR2A,GPX2,IL1B,LCN2,LGALS3,MCM3,MYC,PTGS2,Pvr,SPP1,TIMP1,TMEM173,TNFRSF12A,TUBB                                                                                                                                                                                                                                                                                                                                                                                                                                                                                                                                                                                                                                                                                                                                                                                                                                                                              |
| tamoxifen                   | chemical drug                       |                            | 0.336              | 9.79E-09           | ANG,BCL2L1,BIRC5,BMP4,CAV1,CCNA2,CDKN1A,CLU,CSAD,CYP2F1,CYP3A5,CYR61,EPHX1,ERBB2,ERBB3,ETV5,FABP1,FASN,HMGR,HMGC51,IGFBP3,IL1RN,IL6,IRS1,JUNB,KHLH2A,LDLR,LSS,LTBP2,MAFF,MIF,MKI67,MYC,PCNA,PFN1,PRSS23,PTGS2,RBL2,S100G,SCD,SCUBE2,SELE,SERPINA3,SLC2A3,SOD2,SPP1,USP1,YPEL3                                                                                                                                                                                                                                                                                                                                                                                                                                                                                                                                                                                                                                                                                                                                          |
| fluticasone propionate      | chemical drug                       |                            | -1.907             | 9.84E-09           | ANGPT4,CCL20,CCL22,CD74,CE51,CH1L1,CXCL10,FBNS5,FSCN1,GAL,HALA-HRA,HPGD,HS011B1,HTRA1,IL1B,IL1RN,IRS2,MERTK,MFGE8,MMP9,PCOLCE2,PHLDA1,PTGS1,RCAN1,S100A8,SERPINA1,SERPINE1,SESN1,SLC1A3,SPP1,THBS1,TIMP1,TSC22D3,ZCCHC6                                                                                                                                                                                                                                                                                                                                                                                                                                                                                                                                                                                                                                                                                                                                                                                                |
| bee venom                   | chemical - endogenous non-mammalian |                            | -0.557             | 1.17E-08           | AREG,Ccl2,CDC42EP4,CREBBP,DNAJB1,HAS1,HSPA4A,HSPB1,IFRD1,IL1B,IPO5,JUNB,KIF23,MKI67,NF13,NUSAP1,PRC1,PTGS2,RCAN1,SGS2,Saa3,SOC3,THBD,TNFAIP2,Tnfsf9,TO2A,TRAF1                                                                                                                                                                                                                                                                                                                                                                                                                                                                                                                                                                                                                                                                                                                                                                                                                                                         |
| rosiglitazone               | chemical drug                       | Inhibited                  | -2.783             | 1.72E-08           | ACADM,ADAMT51,ADRB3,ANGPT4,C1QP,CAV1,CCL17,Ccl2,CD68,CDKN1A,CLEC7A,CTGF,CXCL10,CYP1A1,DHRS3,F3,FABP1,FASN,FDX1,FGF1,FN1,FOSL1,GATA3,GBP2,GRIA1,HAS1,HLA-DRA,HPGD,HS011B1,IGFBP2,IL18,IL1B,IL1RN,IL6,IRS1,IRS2,KRT18,LCN2,LRG1,MAT2A,MCM6,MCM7,MDH2,MMP9,NOX4,NR1D1,PCNA,PLTP,PTGES,PTGS2,RRRES2,Retnla,SGS2,RORA,S100A8,S100A9,Saa3,SCD,SERPINE1,SOC3,SOD2,THBS1,TIMP1,TNC,VLDLR,WISP1                                                                                                                                                                                                                                                                                                                                                                                                                                                                                                                                                                                                                                 |
| chlorpromazine              | chemical drug                       |                            | 0.41               | 1.81E-08           | DHCR7,FABP1,FDP5,HMGR,HMGC51,IL1B,IL1B,LDLR,LSS,MSMO1,MVK,SCD,SERPINA3,SLC2A3,SQLE,TMEM140,TSC22D3                                                                                                                                                                                                                                                                                                                                                                                                                                                                                                                                                                                                                                                                                                                                                                                                                                                                                                                     |

| Upstream Regulator  | Molecule Type | Predicted Activation State | Activation z-score | p-value of overlap | Target molecules in dataset                                                                                                                                                                                                |
|---------------------|---------------|----------------------------|--------------------|--------------------|----------------------------------------------------------------------------------------------------------------------------------------------------------------------------------------------------------------------------|
| N-acetyl-L-cysteine | chemical drug |                            | -1.839             | 1.90E-08           | ABCB1,ADORA2B,ATF4,BCL2L1,BIRC5,CAV1,Cd2,CCL20,CCND2,CDKN1A,CTGF,CXCL10,CYR61,EDN1,FASN,FOXO3,GCLC,GNL3,HBEGF,HLA-DRA,IL1B,IL6,MMP2,MMP9,MYC,MYH11,NFE2L2,PCNA,PLAUR,PPRC1,PTGS2,SELE,SERPINE1,SLC16A1,SOD2,SPP1,TNC,VCAM1 |

**Table S3. Tumor necrosis factor receptor (TNFR)-dependent basal lung genes.**  
Affymetrix\_GeneChip\_MOE430A. Moderated t-test (p<0.05). Order by fold difference (FD).  
Selected genes varied  $\geq 1.2$ -fold between C57BL/6J and Tnfr-KO mice (positive-higher in KO, negative-lower in KO).

| p (WT:KO) | RefSeq Tran: | FD    | Air              | Gene Symbol      | Gene Title       | Gene Ontology Biological Process |                  |                 |                 |                                                                                                                           |                                                                                                                                                                                                                                                                                                                                                                                                                                                                                                                                                                                                                                                                                                                                                                                                                                                                                                                                                                                                                                                                                                                                                                                                                                                                                                                                                                                                                                                                                                                                                                                                                                                                                                                                                                                                                                                                                                                                                                                                                                                                                                                                                                                                                                                                                                                                                                                                                                                                                                                                                                                                                                                                                                                                                                                                                                                                                                                                                                                                                                                                                                                                                                                                                                                                                                                                                                                                                                                                                                                                                                                                                                                                                                                                                                                                                                                                                                                                           |
|-----------|--------------|-------|------------------|------------------|------------------|----------------------------------|------------------|-----------------|-----------------|---------------------------------------------------------------------------------------------------------------------------|-------------------------------------------------------------------------------------------------------------------------------------------------------------------------------------------------------------------------------------------------------------------------------------------------------------------------------------------------------------------------------------------------------------------------------------------------------------------------------------------------------------------------------------------------------------------------------------------------------------------------------------------------------------------------------------------------------------------------------------------------------------------------------------------------------------------------------------------------------------------------------------------------------------------------------------------------------------------------------------------------------------------------------------------------------------------------------------------------------------------------------------------------------------------------------------------------------------------------------------------------------------------------------------------------------------------------------------------------------------------------------------------------------------------------------------------------------------------------------------------------------------------------------------------------------------------------------------------------------------------------------------------------------------------------------------------------------------------------------------------------------------------------------------------------------------------------------------------------------------------------------------------------------------------------------------------------------------------------------------------------------------------------------------------------------------------------------------------------------------------------------------------------------------------------------------------------------------------------------------------------------------------------------------------------------------------------------------------------------------------------------------------------------------------------------------------------------------------------------------------------------------------------------------------------------------------------------------------------------------------------------------------------------------------------------------------------------------------------------------------------------------------------------------------------------------------------------------------------------------------------------------------------------------------------------------------------------------------------------------------------------------------------------------------------------------------------------------------------------------------------------------------------------------------------------------------------------------------------------------------------------------------------------------------------------------------------------------------------------------------------------------------------------------------------------------------------------------------------------------------------------------------------------------------------------------------------------------------------------------------------------------------------------------------------------------------------------------------------------------------------------------------------------------------------------------------------------------------------------------------------------------------------------------------------------------------|
| 0.001472  | NM_001045    | -2.23 | <b>Mup1</b>      | <b>Mup10</b>     | <b>Mup12</b>     | <b>Mup13</b>                     | <b>Mup14</b>     | <b>Mup15</b>    | <b>Mup17</b>    | major urinary protein LOC100048885//predicted gene, 21320//major urinary protein                                          | 0006112 // energy reserve metabolic process // inferred from sequence or structural similarity//0006112, 0001558 // regulation of cell growth // not recorded//0006281 // DNA repair // inferred from electronic annotation//0006810 // transport // inferred from electronic annotation//0006886 // intracellular protein transport // inferred from electronic annotation//0006112 // energy reserve metabolic process // inferred from sequence or structural similarity//0006112, 0002376 // immune system process // inferred from electronic annotation//0002523 // leukocyte migration // immune system process // inferred from electronic annotation//0002523 // leukocyte migration // response to hypoxia // inferred from electronic annotation//0003085 // negative regulation of peptidase activity // inferred from electronic annotation//00010951 // negative regulation of proteolysis // inferred from electronic annotation//0006915 // apoptotic process // inferred from electronic annotation//0001501 // skeletal system development // inferred from direct assay//0001501 // skeletal system development // inferred from electronic annotation//0006810 // transport // inferred from electronic annotation//0006810 // transport // inferred from electronic annotation//00010951 // negative regulation of peptidase activity // inferred from electronic annotation//00010951 // negative regulation of response to unfolded protein // traceable author statement//0043524 // negative regulation of MAPK cascade // not recorded//0002230 // positive regulation of defense response to virus by protein import into nucleus, translocation // inferred from direct assay//0006351 // transcript // response to hypoxia // inferred from electronic annotation//0001889 // liver development // inferred from electronic annotation//00018401 // peptidyl-proline hydroxylation to 4-hydroxy-L-proline // inferred from direct assay//0030199 // osteoblast differentiation // not recorded//0007155 // cell adhesion // inferred from electronic annotation//0001701 // in utero embryonic development // inferred from mutant phenotype//0006487 // protein N-glycosylation // neutrophil homeostasis // inferred from mutant phenotype//0006198 // cAMP catabolic process // inferred from mutant phenotype//0006508 // proteolysis // not recorded//00010243 // response to organonitrogen compound // inferred from electronic annotation//0031100 // response to hypoxia // inferred from direct assay//0006810 // transport // inferred from electronic annotation//000122 // negative regulation of transcription from RNA polymerase II promoter // not recorded//00063006457 // protein folding // not recorded//0006986 // response to unfolded protein // not recorded // phosphocreatine metabolic process // traceable author statement//0016310 // phosphorylation // regulation of cell growth // inferred from genetic interaction//0001649 // osteoblast differentiation // acute inflammatory response // inferred from electronic annotation//0002740 // negative regulation of gene expression // inferred from sequence or structural similarity//00090002376 // immune system process // inferred from electronic annotation//0002448 // mast cell mediator // osteoblast differentiation // not recorded//0006457 // protein folding // inferred from electronic annotation//0001974 // blood vessel remodeling // inferred from electronic annotation//0002026 // regulation of adaptive immune response // inferred from electronic annotation//0002376 // immune system process // retina layer formation // inferred from mutant phenotype//0045494 // photoreceptor cell maturation // negative regulation of transcription from RNA polymerase II promoter // inferred from mutant phenotype//0055114 // oxidation-reduction process // inferred from electronic annotation |
| 2.26E-08  | NM_001131    | -4.27 | <b>Pttg1</b>     |                  |                  |                                  |                  |                 |                 | pituitary tumor-transforming gene 1                                                                                       |                                                                                                                                                                                                                                                                                                                                                                                                                                                                                                                                                                                                                                                                                                                                                                                                                                                                                                                                                                                                                                                                                                                                                                                                                                                                                                                                                                                                                                                                                                                                                                                                                                                                                                                                                                                                                                                                                                                                                                                                                                                                                                                                                                                                                                                                                                                                                                                                                                                                                                                                                                                                                                                                                                                                                                                                                                                                                                                                                                                                                                                                                                                                                                                                                                                                                                                                                                                                                                                                                                                                                                                                                                                                                                                                                                                                                                                                                                                                           |
| 1.93E-07  | NM_173781    | -3.10 | <b>Rabb6</b>     |                  |                  |                                  |                  |                 |                 | RAM6B, member RAS oncogene family                                                                                         |                                                                                                                                                                                                                                                                                                                                                                                                                                                                                                                                                                                                                                                                                                                                                                                                                                                                                                                                                                                                                                                                                                                                                                                                                                                                                                                                                                                                                                                                                                                                                                                                                                                                                                                                                                                                                                                                                                                                                                                                                                                                                                                                                                                                                                                                                                                                                                                                                                                                                                                                                                                                                                                                                                                                                                                                                                                                                                                                                                                                                                                                                                                                                                                                                                                                                                                                                                                                                                                                                                                                                                                                                                                                                                                                                                                                                                                                                                                                           |
| 0.0191618 | NM_001039    | -2.66 | <b>Mup1</b>      | <b>Mup10</b>     | <b>Mup11</b>     | <b>Mup12</b>                     | <b>Mup14</b>     | <b>Mup16</b>    | <b>Mup18</b>    | major urinary protein 1//major urinary protein 10//major urinary protein 11                                               |                                                                                                                                                                                                                                                                                                                                                                                                                                                                                                                                                                                                                                                                                                                                                                                                                                                                                                                                                                                                                                                                                                                                                                                                                                                                                                                                                                                                                                                                                                                                                                                                                                                                                                                                                                                                                                                                                                                                                                                                                                                                                                                                                                                                                                                                                                                                                                                                                                                                                                                                                                                                                                                                                                                                                                                                                                                                                                                                                                                                                                                                                                                                                                                                                                                                                                                                                                                                                                                                                                                                                                                                                                                                                                                                                                                                                                                                                                                                           |
| 0.0027583 | NM_013650    | -2.46 | <b>S100a8</b>    |                  |                  |                                  |                  |                 |                 | S100 calcium binding protein A8 (calgranulin A)                                                                           |                                                                                                                                                                                                                                                                                                                                                                                                                                                                                                                                                                                                                                                                                                                                                                                                                                                                                                                                                                                                                                                                                                                                                                                                                                                                                                                                                                                                                                                                                                                                                                                                                                                                                                                                                                                                                                                                                                                                                                                                                                                                                                                                                                                                                                                                                                                                                                                                                                                                                                                                                                                                                                                                                                                                                                                                                                                                                                                                                                                                                                                                                                                                                                                                                                                                                                                                                                                                                                                                                                                                                                                                                                                                                                                                                                                                                                                                                                                                           |
| 2.47E-04  | NM_001281    | -2.40 | <b>S100a9</b>    |                  |                  |                                  |                  |                 |                 | S100 calcium binding protein A9 (calgranulin B)                                                                           |                                                                                                                                                                                                                                                                                                                                                                                                                                                                                                                                                                                                                                                                                                                                                                                                                                                                                                                                                                                                                                                                                                                                                                                                                                                                                                                                                                                                                                                                                                                                                                                                                                                                                                                                                                                                                                                                                                                                                                                                                                                                                                                                                                                                                                                                                                                                                                                                                                                                                                                                                                                                                                                                                                                                                                                                                                                                                                                                                                                                                                                                                                                                                                                                                                                                                                                                                                                                                                                                                                                                                                                                                                                                                                                                                                                                                                                                                                                                           |
| 0.0174304 | NM_008725    | -2.34 | <b>Nppa</b>      |                  |                  |                                  |                  |                 |                 | natriuretic peptide type A                                                                                                |                                                                                                                                                                                                                                                                                                                                                                                                                                                                                                                                                                                                                                                                                                                                                                                                                                                                                                                                                                                                                                                                                                                                                                                                                                                                                                                                                                                                                                                                                                                                                                                                                                                                                                                                                                                                                                                                                                                                                                                                                                                                                                                                                                                                                                                                                                                                                                                                                                                                                                                                                                                                                                                                                                                                                                                                                                                                                                                                                                                                                                                                                                                                                                                                                                                                                                                                                                                                                                                                                                                                                                                                                                                                                                                                                                                                                                                                                                                                           |
| 0.0081202 | NM_011458    | -2.22 | <b>Serpina3k</b> |                  |                  |                                  |                  |                 |                 | serine (or cysteine) peptidase inhibitor, clade A, member 3K                                                              |                                                                                                                                                                                                                                                                                                                                                                                                                                                                                                                                                                                                                                                                                                                                                                                                                                                                                                                                                                                                                                                                                                                                                                                                                                                                                                                                                                                                                                                                                                                                                                                                                                                                                                                                                                                                                                                                                                                                                                                                                                                                                                                                                                                                                                                                                                                                                                                                                                                                                                                                                                                                                                                                                                                                                                                                                                                                                                                                                                                                                                                                                                                                                                                                                                                                                                                                                                                                                                                                                                                                                                                                                                                                                                                                                                                                                                                                                                                                           |
| 3.42E-05  | NM_010370    | -2.10 | <b>Gzma</b>      |                  |                  |                                  |                  |                 |                 | granzyme A                                                                                                                |                                                                                                                                                                                                                                                                                                                                                                                                                                                                                                                                                                                                                                                                                                                                                                                                                                                                                                                                                                                                                                                                                                                                                                                                                                                                                                                                                                                                                                                                                                                                                                                                                                                                                                                                                                                                                                                                                                                                                                                                                                                                                                                                                                                                                                                                                                                                                                                                                                                                                                                                                                                                                                                                                                                                                                                                                                                                                                                                                                                                                                                                                                                                                                                                                                                                                                                                                                                                                                                                                                                                                                                                                                                                                                                                                                                                                                                                                                                                           |
| 0.0332464 | NM_001039    | -2.08 | <b>Npr3</b>      |                  |                  |                                  |                  |                 |                 | natriuretic peptide receptor 3                                                                                            |                                                                                                                                                                                                                                                                                                                                                                                                                                                                                                                                                                                                                                                                                                                                                                                                                                                                                                                                                                                                                                                                                                                                                                                                                                                                                                                                                                                                                                                                                                                                                                                                                                                                                                                                                                                                                                                                                                                                                                                                                                                                                                                                                                                                                                                                                                                                                                                                                                                                                                                                                                                                                                                                                                                                                                                                                                                                                                                                                                                                                                                                                                                                                                                                                                                                                                                                                                                                                                                                                                                                                                                                                                                                                                                                                                                                                                                                                                                                           |
| 0.0016276 | NM_009654    | -1.99 | <b>Alb</b>       |                  |                  |                                  |                  |                 |                 | albumin                                                                                                                   |                                                                                                                                                                                                                                                                                                                                                                                                                                                                                                                                                                                                                                                                                                                                                                                                                                                                                                                                                                                                                                                                                                                                                                                                                                                                                                                                                                                                                                                                                                                                                                                                                                                                                                                                                                                                                                                                                                                                                                                                                                                                                                                                                                                                                                                                                                                                                                                                                                                                                                                                                                                                                                                                                                                                                                                                                                                                                                                                                                                                                                                                                                                                                                                                                                                                                                                                                                                                                                                                                                                                                                                                                                                                                                                                                                                                                                                                                                                                           |
| 0.0055523 | NM_009245    | -1.96 | <b>Serpina1c</b> |                  |                  |                                  |                  |                 |                 | serine (or cysteine) peptidase inhibitor, clade A, member 1C                                                              |                                                                                                                                                                                                                                                                                                                                                                                                                                                                                                                                                                                                                                                                                                                                                                                                                                                                                                                                                                                                                                                                                                                                                                                                                                                                                                                                                                                                                                                                                                                                                                                                                                                                                                                                                                                                                                                                                                                                                                                                                                                                                                                                                                                                                                                                                                                                                                                                                                                                                                                                                                                                                                                                                                                                                                                                                                                                                                                                                                                                                                                                                                                                                                                                                                                                                                                                                                                                                                                                                                                                                                                                                                                                                                                                                                                                                                                                                                                                           |
| 0.0053431 | NM_013559    | -1.89 | <b>Hsph1</b>     |                  |                  |                                  |                  |                 |                 | heat shock 105kDa/110kDa protein 1                                                                                        |                                                                                                                                                                                                                                                                                                                                                                                                                                                                                                                                                                                                                                                                                                                                                                                                                                                                                                                                                                                                                                                                                                                                                                                                                                                                                                                                                                                                                                                                                                                                                                                                                                                                                                                                                                                                                                                                                                                                                                                                                                                                                                                                                                                                                                                                                                                                                                                                                                                                                                                                                                                                                                                                                                                                                                                                                                                                                                                                                                                                                                                                                                                                                                                                                                                                                                                                                                                                                                                                                                                                                                                                                                                                                                                                                                                                                                                                                                                                           |
| 1.40E-04  | NM_013653    | -1.79 | <b>Ccl5</b>      |                  |                  |                                  |                  |                 |                 | chemokine (C-C motif) ligand 5                                                                                            |                                                                                                                                                                                                                                                                                                                                                                                                                                                                                                                                                                                                                                                                                                                                                                                                                                                                                                                                                                                                                                                                                                                                                                                                                                                                                                                                                                                                                                                                                                                                                                                                                                                                                                                                                                                                                                                                                                                                                                                                                                                                                                                                                                                                                                                                                                                                                                                                                                                                                                                                                                                                                                                                                                                                                                                                                                                                                                                                                                                                                                                                                                                                                                                                                                                                                                                                                                                                                                                                                                                                                                                                                                                                                                                                                                                                                                                                                                                                           |
| 7.16E-05  | NM_001243    | -1.73 | <b>Arntl</b>     |                  |                  |                                  |                  |                 |                 | aryl hydrocarbon receptor nuclear translocator-like                                                                       |                                                                                                                                                                                                                                                                                                                                                                                                                                                                                                                                                                                                                                                                                                                                                                                                                                                                                                                                                                                                                                                                                                                                                                                                                                                                                                                                                                                                                                                                                                                                                                                                                                                                                                                                                                                                                                                                                                                                                                                                                                                                                                                                                                                                                                                                                                                                                                                                                                                                                                                                                                                                                                                                                                                                                                                                                                                                                                                                                                                                                                                                                                                                                                                                                                                                                                                                                                                                                                                                                                                                                                                                                                                                                                                                                                                                                                                                                                                                           |
| 0.0031658 | NM_001136    | -1.67 | <b>Cyp11a1</b>   |                  |                  |                                  |                  |                 |                 | cytochrome P450, family 1, subfamily a, polypeptide 1                                                                     |                                                                                                                                                                                                                                                                                                                                                                                                                                                                                                                                                                                                                                                                                                                                                                                                                                                                                                                                                                                                                                                                                                                                                                                                                                                                                                                                                                                                                                                                                                                                                                                                                                                                                                                                                                                                                                                                                                                                                                                                                                                                                                                                                                                                                                                                                                                                                                                                                                                                                                                                                                                                                                                                                                                                                                                                                                                                                                                                                                                                                                                                                                                                                                                                                                                                                                                                                                                                                                                                                                                                                                                                                                                                                                                                                                                                                                                                                                                                           |
| 0.0069887 | NM_001316    | -1.66 | <b>P4ha1</b>     |                  |                  |                                  |                  |                 |                 | procollagen-proline, 2-oxoglutarate 4-dioxygenase (proline 4-hydroxylase), alpha 1                                        |                                                                                                                                                                                                                                                                                                                                                                                                                                                                                                                                                                                                                                                                                                                                                                                                                                                                                                                                                                                                                                                                                                                                                                                                                                                                                                                                                                                                                                                                                                                                                                                                                                                                                                                                                                                                                                                                                                                                                                                                                                                                                                                                                                                                                                                                                                                                                                                                                                                                                                                                                                                                                                                                                                                                                                                                                                                                                                                                                                                                                                                                                                                                                                                                                                                                                                                                                                                                                                                                                                                                                                                                                                                                                                                                                                                                                                                                                                                                           |
| 0.0040327 | NM_011607    | -1.65 | <b>Tnc</b>       |                  |                  |                                  |                  |                 |                 | tenascin C                                                                                                                |                                                                                                                                                                                                                                                                                                                                                                                                                                                                                                                                                                                                                                                                                                                                                                                                                                                                                                                                                                                                                                                                                                                                                                                                                                                                                                                                                                                                                                                                                                                                                                                                                                                                                                                                                                                                                                                                                                                                                                                                                                                                                                                                                                                                                                                                                                                                                                                                                                                                                                                                                                                                                                                                                                                                                                                                                                                                                                                                                                                                                                                                                                                                                                                                                                                                                                                                                                                                                                                                                                                                                                                                                                                                                                                                                                                                                                                                                                                                           |
| 0.0166123 | NM_009244    | -1.60 | <b>Serpina1b</b> |                  |                  |                                  |                  |                 |                 | serine (or cysteine) peptidase inhibitor, clade A, member 1B                                                              |                                                                                                                                                                                                                                                                                                                                                                                                                                                                                                                                                                                                                                                                                                                                                                                                                                                                                                                                                                                                                                                                                                                                                                                                                                                                                                                                                                                                                                                                                                                                                                                                                                                                                                                                                                                                                                                                                                                                                                                                                                                                                                                                                                                                                                                                                                                                                                                                                                                                                                                                                                                                                                                                                                                                                                                                                                                                                                                                                                                                                                                                                                                                                                                                                                                                                                                                                                                                                                                                                                                                                                                                                                                                                                                                                                                                                                                                                                                                           |
| 0.0010145 | NM_001177    | -1.58 | <b>Pde4b</b>     |                  |                  |                                  |                  |                 |                 | phosphodiesterase 4B, cAMP specific                                                                                       |                                                                                                                                                                                                                                                                                                                                                                                                                                                                                                                                                                                                                                                                                                                                                                                                                                                                                                                                                                                                                                                                                                                                                                                                                                                                                                                                                                                                                                                                                                                                                                                                                                                                                                                                                                                                                                                                                                                                                                                                                                                                                                                                                                                                                                                                                                                                                                                                                                                                                                                                                                                                                                                                                                                                                                                                                                                                                                                                                                                                                                                                                                                                                                                                                                                                                                                                                                                                                                                                                                                                                                                                                                                                                                                                                                                                                                                                                                                                           |
| 3.57E-05  | NM_010809    | -1.56 | <b>Mmp3</b>      |                  |                  |                                  |                  |                 |                 | matrix metalloproteinase 3                                                                                                |                                                                                                                                                                                                                                                                                                                                                                                                                                                                                                                                                                                                                                                                                                                                                                                                                                                                                                                                                                                                                                                                                                                                                                                                                                                                                                                                                                                                                                                                                                                                                                                                                                                                                                                                                                                                                                                                                                                                                                                                                                                                                                                                                                                                                                                                                                                                                                                                                                                                                                                                                                                                                                                                                                                                                                                                                                                                                                                                                                                                                                                                                                                                                                                                                                                                                                                                                                                                                                                                                                                                                                                                                                                                                                                                                                                                                                                                                                                                           |
| 5.40E-05  | NM_001311    | -1.55 | <b>Nnmt</b>      |                  |                  |                                  |                  |                 |                 | nicotinamide N-methyltransferase                                                                                          |                                                                                                                                                                                                                                                                                                                                                                                                                                                                                                                                                                                                                                                                                                                                                                                                                                                                                                                                                                                                                                                                                                                                                                                                                                                                                                                                                                                                                                                                                                                                                                                                                                                                                                                                                                                                                                                                                                                                                                                                                                                                                                                                                                                                                                                                                                                                                                                                                                                                                                                                                                                                                                                                                                                                                                                                                                                                                                                                                                                                                                                                                                                                                                                                                                                                                                                                                                                                                                                                                                                                                                                                                                                                                                                                                                                                                                                                                                                                           |
| 0.0328579 | NM_016737    | -1.54 | <b>Stip1</b>     |                  |                  |                                  |                  |                 |                 | stress-induced phosphoprotein 1                                                                                           |                                                                                                                                                                                                                                                                                                                                                                                                                                                                                                                                                                                                                                                                                                                                                                                                                                                                                                                                                                                                                                                                                                                                                                                                                                                                                                                                                                                                                                                                                                                                                                                                                                                                                                                                                                                                                                                                                                                                                                                                                                                                                                                                                                                                                                                                                                                                                                                                                                                                                                                                                                                                                                                                                                                                                                                                                                                                                                                                                                                                                                                                                                                                                                                                                                                                                                                                                                                                                                                                                                                                                                                                                                                                                                                                                                                                                                                                                                                                           |
| 0.0201377 | NM_053247    | -1.54 | <b>Lyve1</b>     |                  |                  |                                  |                  |                 |                 | lymphatic vessel endothelial hyaluronan receptor 1                                                                        |                                                                                                                                                                                                                                                                                                                                                                                                                                                                                                                                                                                                                                                                                                                                                                                                                                                                                                                                                                                                                                                                                                                                                                                                                                                                                                                                                                                                                                                                                                                                                                                                                                                                                                                                                                                                                                                                                                                                                                                                                                                                                                                                                                                                                                                                                                                                                                                                                                                                                                                                                                                                                                                                                                                                                                                                                                                                                                                                                                                                                                                                                                                                                                                                                                                                                                                                                                                                                                                                                                                                                                                                                                                                                                                                                                                                                                                                                                                                           |
| 6.37E-04  | NM_017373    | -1.53 | <b>Nfil3</b>     |                  |                  |                                  |                  |                 |                 | nuclear factor, interleukin 3, regulated                                                                                  |                                                                                                                                                                                                                                                                                                                                                                                                                                                                                                                                                                                                                                                                                                                                                                                                                                                                                                                                                                                                                                                                                                                                                                                                                                                                                                                                                                                                                                                                                                                                                                                                                                                                                                                                                                                                                                                                                                                                                                                                                                                                                                                                                                                                                                                                                                                                                                                                                                                                                                                                                                                                                                                                                                                                                                                                                                                                                                                                                                                                                                                                                                                                                                                                                                                                                                                                                                                                                                                                                                                                                                                                                                                                                                                                                                                                                                                                                                                                           |
| 0.0312099 | NM_011020    | -1.52 | <b>Hspa4l</b>    |                  |                  |                                  |                  |                 |                 | heat shock protein 4 like                                                                                                 |                                                                                                                                                                                                                                                                                                                                                                                                                                                                                                                                                                                                                                                                                                                                                                                                                                                                                                                                                                                                                                                                                                                                                                                                                                                                                                                                                                                                                                                                                                                                                                                                                                                                                                                                                                                                                                                                                                                                                                                                                                                                                                                                                                                                                                                                                                                                                                                                                                                                                                                                                                                                                                                                                                                                                                                                                                                                                                                                                                                                                                                                                                                                                                                                                                                                                                                                                                                                                                                                                                                                                                                                                                                                                                                                                                                                                                                                                                                                           |
| 0.0370396 | NM_198415    | -1.52 | <b>Ckmt2</b>     |                  |                  |                                  |                  |                 |                 | creatine kinase, mitochondrial 2                                                                                          |                                                                                                                                                                                                                                                                                                                                                                                                                                                                                                                                                                                                                                                                                                                                                                                                                                                                                                                                                                                                                                                                                                                                                                                                                                                                                                                                                                                                                                                                                                                                                                                                                                                                                                                                                                                                                                                                                                                                                                                                                                                                                                                                                                                                                                                                                                                                                                                                                                                                                                                                                                                                                                                                                                                                                                                                                                                                                                                                                                                                                                                                                                                                                                                                                                                                                                                                                                                                                                                                                                                                                                                                                                                                                                                                                                                                                                                                                                                                           |
| 7.06E-04  | NM_008343    | -1.52 | <b>Igf1bp3</b>   |                  |                  |                                  |                  |                 |                 | insulin-like growth factor binding protein 3                                                                              |                                                                                                                                                                                                                                                                                                                                                                                                                                                                                                                                                                                                                                                                                                                                                                                                                                                                                                                                                                                                                                                                                                                                                                                                                                                                                                                                                                                                                                                                                                                                                                                                                                                                                                                                                                                                                                                                                                                                                                                                                                                                                                                                                                                                                                                                                                                                                                                                                                                                                                                                                                                                                                                                                                                                                                                                                                                                                                                                                                                                                                                                                                                                                                                                                                                                                                                                                                                                                                                                                                                                                                                                                                                                                                                                                                                                                                                                                                                                           |
| 0.0321213 | NM_001305    | -1.51 | <b>Apoa2</b>     |                  |                  |                                  |                  |                 |                 | apolipoprotein A-II                                                                                                       |                                                                                                                                                                                                                                                                                                                                                                                                                                                                                                                                                                                                                                                                                                                                                                                                                                                                                                                                                                                                                                                                                                                                                                                                                                                                                                                                                                                                                                                                                                                                                                                                                                                                                                                                                                                                                                                                                                                                                                                                                                                                                                                                                                                                                                                                                                                                                                                                                                                                                                                                                                                                                                                                                                                                                                                                                                                                                                                                                                                                                                                                                                                                                                                                                                                                                                                                                                                                                                                                                                                                                                                                                                                                                                                                                                                                                                                                                                                                           |
| 0.0256944 | NM_009610    | -1.50 | <b>Actg2</b>     |                  |                  |                                  |                  |                 |                 | actin, gamma 2, smooth muscle, enteric                                                                                    |                                                                                                                                                                                                                                                                                                                                                                                                                                                                                                                                                                                                                                                                                                                                                                                                                                                                                                                                                                                                                                                                                                                                                                                                                                                                                                                                                                                                                                                                                                                                                                                                                                                                                                                                                                                                                                                                                                                                                                                                                                                                                                                                                                                                                                                                                                                                                                                                                                                                                                                                                                                                                                                                                                                                                                                                                                                                                                                                                                                                                                                                                                                                                                                                                                                                                                                                                                                                                                                                                                                                                                                                                                                                                                                                                                                                                                                                                                                                           |
| 0.0017118 | NM_133903    | -1.50 | <b>Spon2</b>     |                  |                  |                                  |                  |                 |                 | spondin 2, extracellular matrix protein                                                                                   |                                                                                                                                                                                                                                                                                                                                                                                                                                                                                                                                                                                                                                                                                                                                                                                                                                                                                                                                                                                                                                                                                                                                                                                                                                                                                                                                                                                                                                                                                                                                                                                                                                                                                                                                                                                                                                                                                                                                                                                                                                                                                                                                                                                                                                                                                                                                                                                                                                                                                                                                                                                                                                                                                                                                                                                                                                                                                                                                                                                                                                                                                                                                                                                                                                                                                                                                                                                                                                                                                                                                                                                                                                                                                                                                                                                                                                                                                                                                           |
| 0.0273517 | NM_008303    | -1.47 | <b>Hspe1</b>     |                  |                  |                                  |                  |                 |                 | heat shock protein 1 (chaperonin 10)                                                                                      |                                                                                                                                                                                                                                                                                                                                                                                                                                                                                                                                                                                                                                                                                                                                                                                                                                                                                                                                                                                                                                                                                                                                                                                                                                                                                                                                                                                                                                                                                                                                                                                                                                                                                                                                                                                                                                                                                                                                                                                                                                                                                                                                                                                                                                                                                                                                                                                                                                                                                                                                                                                                                                                                                                                                                                                                                                                                                                                                                                                                                                                                                                                                                                                                                                                                                                                                                                                                                                                                                                                                                                                                                                                                                                                                                                                                                                                                                                                                           |
| 0.0456736 | NM_001198    | -1.46 | <b>Csrp3</b>     |                  |                  |                                  |                  |                 |                 | cysteine and glycine-rich protein 3                                                                                       |                                                                                                                                                                                                                                                                                                                                                                                                                                                                                                                                                                                                                                                                                                                                                                                                                                                                                                                                                                                                                                                                                                                                                                                                                                                                                                                                                                                                                                                                                                                                                                                                                                                                                                                                                                                                                                                                                                                                                                                                                                                                                                                                                                                                                                                                                                                                                                                                                                                                                                                                                                                                                                                                                                                                                                                                                                                                                                                                                                                                                                                                                                                                                                                                                                                                                                                                                                                                                                                                                                                                                                                                                                                                                                                                                                                                                                                                                                                                           |
| 0.030649  | NM_001317    | -1.45 | <b>Fgg</b>       |                  |                  |                                  |                  |                 |                 | fibronogen gamma chain                                                                                                    |                                                                                                                                                                                                                                                                                                                                                                                                                                                                                                                                                                                                                                                                                                                                                                                                                                                                                                                                                                                                                                                                                                                                                                                                                                                                                                                                                                                                                                                                                                                                                                                                                                                                                                                                                                                                                                                                                                                                                                                                                                                                                                                                                                                                                                                                                                                                                                                                                                                                                                                                                                                                                                                                                                                                                                                                                                                                                                                                                                                                                                                                                                                                                                                                                                                                                                                                                                                                                                                                                                                                                                                                                                                                                                                                                                                                                                                                                                                                           |
| 9.35E-04  | NM_001163    | -1.45 | <b>Prom1</b>     |                  |                  |                                  |                  |                 |                 | prominin 1                                                                                                                |                                                                                                                                                                                                                                                                                                                                                                                                                                                                                                                                                                                                                                                                                                                                                                                                                                                                                                                                                                                                                                                                                                                                                                                                                                                                                                                                                                                                                                                                                                                                                                                                                                                                                                                                                                                                                                                                                                                                                                                                                                                                                                                                                                                                                                                                                                                                                                                                                                                                                                                                                                                                                                                                                                                                                                                                                                                                                                                                                                                                                                                                                                                                                                                                                                                                                                                                                                                                                                                                                                                                                                                                                                                                                                                                                                                                                                                                                                                                           |
| 0.006453  | NM_007771    | -1.45 | <b>Cry1</b>      |                  |                  |                                  |                  |                 |                 | cryptochrome 1 (photolyase-like)                                                                                          |                                                                                                                                                                                                                                                                                                                                                                                                                                                                                                                                                                                                                                                                                                                                                                                                                                                                                                                                                                                                                                                                                                                                                                                                                                                                                                                                                                                                                                                                                                                                                                                                                                                                                                                                                                                                                                                                                                                                                                                                                                                                                                                                                                                                                                                                                                                                                                                                                                                                                                                                                                                                                                                                                                                                                                                                                                                                                                                                                                                                                                                                                                                                                                                                                                                                                                                                                                                                                                                                                                                                                                                                                                                                                                                                                                                                                                                                                                                                           |
| 0.0039426 | NM_007818    | -1.44 | <b>Cyp3a11</b>   |                  |                  |                                  |                  |                 |                 | cytochrome P450, family 3, subfamily a, polypeptide 11                                                                    |                                                                                                                                                                                                                                                                                                                                                                                                                                                                                                                                                                                                                                                                                                                                                                                                                                                                                                                                                                                                                                                                                                                                                                                                                                                                                                                                                                                                                                                                                                                                                                                                                                                                                                                                                                                                                                                                                                                                                                                                                                                                                                                                                                                                                                                                                                                                                                                                                                                                                                                                                                                                                                                                                                                                                                                                                                                                                                                                                                                                                                                                                                                                                                                                                                                                                                                                                                                                                                                                                                                                                                                                                                                                                                                                                                                                                                                                                                                                           |
| 0.0058147 | NM_020509    | -1.44 | <b>Retnla</b>    |                  |                  |                                  |                  |                 |                 | resistin like alpha                                                                                                       |                                                                                                                                                                                                                                                                                                                                                                                                                                                                                                                                                                                                                                                                                                                                                                                                                                                                                                                                                                                                                                                                                                                                                                                                                                                                                                                                                                                                                                                                                                                                                                                                                                                                                                                                                                                                                                                                                                                                                                                                                                                                                                                                                                                                                                                                                                                                                                                                                                                                                                                                                                                                                                                                                                                                                                                                                                                                                                                                                                                                                                                                                                                                                                                                                                                                                                                                                                                                                                                                                                                                                                                                                                                                                                                                                                                                                                                                                                                                           |
| 2.80E-04  | NM_008719    | -1.44 | <b>Npas2</b>     |                  |                  |                                  |                  |                 |                 | neuronal PAS domain protein 2                                                                                             |                                                                                                                                                                                                                                                                                                                                                                                                                                                                                                                                                                                                                                                                                                                                                                                                                                                                                                                                                                                                                                                                                                                                                                                                                                                                                                                                                                                                                                                                                                                                                                                                                                                                                                                                                                                                                                                                                                                                                                                                                                                                                                                                                                                                                                                                                                                                                                                                                                                                                                                                                                                                                                                                                                                                                                                                                                                                                                                                                                                                                                                                                                                                                                                                                                                                                                                                                                                                                                                                                                                                                                                                                                                                                                                                                                                                                                                                                                                                           |
| 0.0022047 | NM_022324    | -1.43 | <b>Sdf2l1</b>    |                  |                  |                                  |                  |                 |                 | stromal cell-derived factor 2-like 1                                                                                      |                                                                                                                                                                                                                                                                                                                                                                                                                                                                                                                                                                                                                                                                                                                                                                                                                                                                                                                                                                                                                                                                                                                                                                                                                                                                                                                                                                                                                                                                                                                                                                                                                                                                                                                                                                                                                                                                                                                                                                                                                                                                                                                                                                                                                                                                                                                                                                                                                                                                                                                                                                                                                                                                                                                                                                                                                                                                                                                                                                                                                                                                                                                                                                                                                                                                                                                                                                                                                                                                                                                                                                                                                                                                                                                                                                                                                                                                                                                                           |
| 0.0085954 | NM_001111    | -1.42 | <b>Serpinh1</b>  |                  |                  |                                  |                  |                 |                 | serine (or cysteine) peptidase inhibitor, clade H, member 1                                                               |                                                                                                                                                                                                                                                                                                                                                                                                                                                                                                                                                                                                                                                                                                                                                                                                                                                                                                                                                                                                                                                                                                                                                                                                                                                                                                                                                                                                                                                                                                                                                                                                                                                                                                                                                                                                                                                                                                                                                                                                                                                                                                                                                                                                                                                                                                                                                                                                                                                                                                                                                                                                                                                                                                                                                                                                                                                                                                                                                                                                                                                                                                                                                                                                                                                                                                                                                                                                                                                                                                                                                                                                                                                                                                                                                                                                                                                                                                                                           |
| 6.48E-04  | NM_017399    | -1.41 | <b>Fabp1</b>     |                  |                  |                                  |                  |                 |                 | fatty acid binding protein 1, liver                                                                                       |                                                                                                                                                                                                                                                                                                                                                                                                                                                                                                                                                                                                                                                                                                                                                                                                                                                                                                                                                                                                                                                                                                                                                                                                                                                                                                                                                                                                                                                                                                                                                                                                                                                                                                                                                                                                                                                                                                                                                                                                                                                                                                                                                                                                                                                                                                                                                                                                                                                                                                                                                                                                                                                                                                                                                                                                                                                                                                                                                                                                                                                                                                                                                                                                                                                                                                                                                                                                                                                                                                                                                                                                                                                                                                                                                                                                                                                                                                                                           |
| 0.0016451 | NM_018775    | -1.41 | <b>Tbc1d8</b>    |                  |                  |                                  |                  |                 |                 | TBC1 domain family, member 8                                                                                              |                                                                                                                                                                                                                                                                                                                                                                                                                                                                                                                                                                                                                                                                                                                                                                                                                                                                                                                                                                                                                                                                                                                                                                                                                                                                                                                                                                                                                                                                                                                                                                                                                                                                                                                                                                                                                                                                                                                                                                                                                                                                                                                                                                                                                                                                                                                                                                                                                                                                                                                                                                                                                                                                                                                                                                                                                                                                                                                                                                                                                                                                                                                                                                                                                                                                                                                                                                                                                                                                                                                                                                                                                                                                                                                                                                                                                                                                                                                                           |
| 0.0141223 | NM_010477    | -1.41 | <b>Hspd1</b>     |                  |                  |                                  |                  |                 |                 | heat shock protein 1 (chaperonin)                                                                                         |                                                                                                                                                                                                                                                                                                                                                                                                                                                                                                                                                                                                                                                                                                                                                                                                                                                                                                                                                                                                                                                                                                                                                                                                                                                                                                                                                                                                                                                                                                                                                                                                                                                                                                                                                                                                                                                                                                                                                                                                                                                                                                                                                                                                                                                                                                                                                                                                                                                                                                                                                                                                                                                                                                                                                                                                                                                                                                                                                                                                                                                                                                                                                                                                                                                                                                                                                                                                                                                                                                                                                                                                                                                                                                                                                                                                                                                                                                                                           |
| 0.0013471 | NM_019696    | -1.40 | <b>Cpxm1</b>     |                  |                  |                                  |                  |                 |                 | carboxypeptidase X 1 (M14 family)                                                                                         |                                                                                                                                                                                                                                                                                                                                                                                                                                                                                                                                                                                                                                                                                                                                                                                                                                                                                                                                                                                                                                                                                                                                                                                                                                                                                                                                                                                                                                                                                                                                                                                                                                                                                                                                                                                                                                                                                                                                                                                                                                                                                                                                                                                                                                                                                                                                                                                                                                                                                                                                                                                                                                                                                                                                                                                                                                                                                                                                                                                                                                                                                                                                                                                                                                                                                                                                                                                                                                                                                                                                                                                                                                                                                                                                                                                                                                                                                                                                           |
| 0.0453166 | NM_146036    | -1.40 | <b>Ahsa1</b>     |                  |                  |                                  |                  |                 |                 | AHA1, activator of heat shock protein ATPase 1                                                                            |                                                                                                                                                                                                                                                                                                                                                                                                                                                                                                                                                                                                                                                                                                                                                                                                                                                                                                                                                                                                                                                                                                                                                                                                                                                                                                                                                                                                                                                                                                                                                                                                                                                                                                                                                                                                                                                                                                                                                                                                                                                                                                                                                                                                                                                                                                                                                                                                                                                                                                                                                                                                                                                                                                                                                                                                                                                                                                                                                                                                                                                                                                                                                                                                                                                                                                                                                                                                                                                                                                                                                                                                                                                                                                                                                                                                                                                                                                                                           |
| 5.12E-04  | NM_024253    | -1.39 | <b>Nkg7</b>      |                  |                  |                                  |                  |                 |                 | natural killer cell group 7 sequence                                                                                      |                                                                                                                                                                                                                                                                                                                                                                                                                                                                                                                                                                                                                                                                                                                                                                                                                                                                                                                                                                                                                                                                                                                                                                                                                                                                                                                                                                                                                                                                                                                                                                                                                                                                                                                                                                                                                                                                                                                                                                                                                                                                                                                                                                                                                                                                                                                                                                                                                                                                                                                                                                                                                                                                                                                                                                                                                                                                                                                                                                                                                                                                                                                                                                                                                                                                                                                                                                                                                                                                                                                                                                                                                                                                                                                                                                                                                                                                                                                                           |
| 2.92E-05  | NM_009498    | -1.39 | <b>Vamp3</b>     |                  |                  |                                  |                  |                 |                 | vesicle-associated membrane protein 3                                                                                     |                                                                                                                                                                                                                                                                                                                                                                                                                                                                                                                                                                                                                                                                                                                                                                                                                                                                                                                                                                                                                                                                                                                                                                                                                                                                                                                                                                                                                                                                                                                                                                                                                                                                                                                                                                                                                                                                                                                                                                                                                                                                                                                                                                                                                                                                                                                                                                                                                                                                                                                                                                                                                                                                                                                                                                                                                                                                                                                                                                                                                                                                                                                                                                                                                                                                                                                                                                                                                                                                                                                                                                                                                                                                                                                                                                                                                                                                                                                                           |
| 0.0010585 | NM_019738    | -1.39 | <b>Nupr1</b>     |                  |                  |                                  |                  |                 |                 | nuclear protein transcription regulator 1                                                                                 |                                                                                                                                                                                                                                                                                                                                                                                                                                                                                                                                                                                                                                                                                                                                                                                                                                                                                                                                                                                                                                                                                                                                                                                                                                                                                                                                                                                                                                                                                                                                                                                                                                                                                                                                                                                                                                                                                                                                                                                                                                                                                                                                                                                                                                                                                                                                                                                                                                                                                                                                                                                                                                                                                                                                                                                                                                                                                                                                                                                                                                                                                                                                                                                                                                                                                                                                                                                                                                                                                                                                                                                                                                                                                                                                                                                                                                                                                                                                           |
| 0.0288408 | NM_010480    | -1.39 | <b>Hsp90aa1</b>  |                  |                  |                                  |                  |                 |                 | heat shock protein 90, alpha (cytosolic), class A member 1                                                                |                                                                                                                                                                                                                                                                                                                                                                                                                                                                                                                                                                                                                                                                                                                                                                                                                                                                                                                                                                                                                                                                                                                                                                                                                                                                                                                                                                                                                                                                                                                                                                                                                                                                                                                                                                                                                                                                                                                                                                                                                                                                                                                                                                                                                                                                                                                                                                                                                                                                                                                                                                                                                                                                                                                                                                                                                                                                                                                                                                                                                                                                                                                                                                                                                                                                                                                                                                                                                                                                                                                                                                                                                                                                                                                                                                                                                                                                                                                                           |
| 0.0213734 | NM_008096    | -1.39 | <b>Gc</b>        |                  |                  |                                  |                  |                 |                 | group specific component                                                                                                  |                                                                                                                                                                                                                                                                                                                                                                                                                                                                                                                                                                                                                                                                                                                                                                                                                                                                                                                                                                                                                                                                                                                                                                                                                                                                                                                                                                                                                                                                                                                                                                                                                                                                                                                                                                                                                                                                                                                                                                                                                                                                                                                                                                                                                                                                                                                                                                                                                                                                                                                                                                                                                                                                                                                                                                                                                                                                                                                                                                                                                                                                                                                                                                                                                                                                                                                                                                                                                                                                                                                                                                                                                                                                                                                                                                                                                                                                                                                                           |
| 0.0416337 | NM_001097    | -1.38 | <b>Hist1h2bc</b> | <b>Hist1h2be</b> | <b>Hist1h2bl</b> | <b>Hist1h2bm</b>                 | <b>Hist1h2bp</b> | <b>Hist1h2b</b> | <b>Hist1h2b</b> | histone cluster 1, H2bc//histone cluster 1, H2be//histone cluster 1, H2bl//histone cluster 1, H2b//histone cluster 1, H2b |                                                                                                                                                                                                                                                                                                                                                                                                                                                                                                                                                                                                                                                                                                                                                                                                                                                                                                                                                                                                                                                                                                                                                                                                                                                                                                                                                                                                                                                                                                                                                                                                                                                                                                                                                                                                                                                                                                                                                                                                                                                                                                                                                                                                                                                                                                                                                                                                                                                                                                                                                                                                                                                                                                                                                                                                                                                                                                                                                                                                                                                                                                                                                                                                                                                                                                                                                                                                                                                                                                                                                                                                                                                                                                                                                                                                                                                                                                                                           |
| 0.0135876 | NM_009692    | -1.37 | <b>Apoa1</b>     |                  |                  |                                  |                  |                 |                 | apolipoprotein A-I                                                                                                        |                                                                                                                                                                                                                                                                                                                                                                                                                                                                                                                                                                                                                                                                                                                                                                                                                                                                                                                                                                                                                                                                                                                                                                                                                                                                                                                                                                                                                                                                                                                                                                                                                                                                                                                                                                                                                                                                                                                                                                                                                                                                                                                                                                                                                                                                                                                                                                                                                                                                                                                                                                                                                                                                                                                                                                                                                                                                                                                                                                                                                                                                                                                                                                                                                                                                                                                                                                                                                                                                                                                                                                                                                                                                                                                                                                                                                                                                                                                                           |
| 6.81E-04  | NM_011332    | -1.37 | <b>Ccl17</b>     |                  |                  |                                  |                  |                 |                 | chemokine (C-C motif) ligand 17                                                                                           |                                                                                                                                                                                                                                                                                                                                                                                                                                                                                                                                                                                                                                                                                                                                                                                                                                                                                                                                                                                                                                                                                                                                                                                                                                                                                                                                                                                                                                                                                                                                                                                                                                                                                                                                                                                                                                                                                                                                                                                                                                                                                                                                                                                                                                                                                                                                                                                                                                                                                                                                                                                                                                                                                                                                                                                                                                                                                                                                                                                                                                                                                                                                                                                                                                                                                                                                                                                                                                                                                                                                                                                                                                                                                                                                                                                                                                                                                                                                           |
| 0.0028375 | NM_009786    | -1.37 | <b>Cacybp</b>    |                  |                  |                                  |                  |                 |                 | calyculin binding protein                                                                                                 |                                                                                                                                                                                                                                                                                                                                                                                                                                                                                                                                                                                                                                                                                                                                                                                                                                                                                                                                                                                                                                                                                                                                                                                                                                                                                                                                                                                                                                                                                                                                                                                                                                                                                                                                                                                                                                                                                                                                                                                                                                                                                                                                                                                                                                                                                                                                                                                                                                                                                                                                                                                                                                                                                                                                                                                                                                                                                                                                                                                                                                                                                                                                                                                                                                                                                                                                                                                                                                                                                                                                                                                                                                                                                                                                                                                                                                                                                                                                           |
| 0.0026462 | NM_026785    | -1.37 | <b>Ube2c</b>     |                  |                  |                                  |                  |                 |                 | ubiquitin-conjugating enzyme E2C                                                                                          |                                                                                                                                                                                                                                                                                                                                                                                                                                                                                                                                                                                                                                                                                                                                                                                                                                                                                                                                                                                                                                                                                                                                                                                                                                                                                                                                                                                                                                                                                                                                                                                                                                                                                                                                                                                                                                                                                                                                                                                                                                                                                                                                                                                                                                                                                                                                                                                                                                                                                                                                                                                                                                                                                                                                                                                                                                                                                                                                                                                                                                                                                                                                                                                                                                                                                                                                                                                                                                                                                                                                                                                                                                                                                                                                                                                                                                                                                                                                           |
| 0.0031939 | NM_001290    | -1.37 | <b>Ahsa2</b>     |                  |                  |                                  |                  |                 |                 | AHA1, activator of heat shock protein ATPase 2                                                                            |                                                                                                                                                                                                                                                                                                                                                                                                                                                                                                                                                                                                                                                                                                                                                                                                                                                                                                                                                                                                                                                                                                                                                                                                                                                                                                                                                                                                                                                                                                                                                                                                                                                                                                                                                                                                                                                                                                                                                                                                                                                                                                                                                                                                                                                                                                                                                                                                                                                                                                                                                                                                                                                                                                                                                                                                                                                                                                                                                                                                                                                                                                                                                                                                                                                                                                                                                                                                                                                                                                                                                                                                                                                                                                                                                                                                                                                                                                                                           |
| 8.97E-05  | NM_146063    | -1.36 | <b>Krt79</b>     |                  |                  |                                  |                  |                 |                 | keratin 79                                                                                                                |                                                                                                                                                                                                                                                                                                                                                                                                                                                                                                                                                                                                                                                                                                                                                                                                                                                                                                                                                                                                                                                                                                                                                                                                                                                                                                                                                                                                                                                                                                                                                                                                                                                                                                                                                                                                                                                                                                                                                                                                                                                                                                                                                                                                                                                                                                                                                                                                                                                                                                                                                                                                                                                                                                                                                                                                                                                                                                                                                                                                                                                                                                                                                                                                                                                                                                                                                                                                                                                                                                                                                                                                                                                                                                                                                                                                                                                                                                                                           |
| 0.0047312 | NM_011817    | -1.34 | <b>Gadd45g</b>   |                  |                  |                                  |                  |                 |                 | growth arrest and DNA-damage-inducible 45 gamma                                                                           |                                                                                                                                                                                                                                                                                                                                                                                                                                                                                                                                                                                                                                                                                                                                                                                                                                                                                                                                                                                                                                                                                                                                                                                                                                                                                                                                                                                                                                                                                                                                                                                                                                                                                                                                                                                                                                                                                                                                                                                                                                                                                                                                                                                                                                                                                                                                                                                                                                                                                                                                                                                                                                                                                                                                                                                                                                                                                                                                                                                                                                                                                                                                                                                                                                                                                                                                                                                                                                                                                                                                                                                                                                                                                                                                                                                                                                                                                                                                           |
| 5.69E-05  | NM_026174    | -1.34 | <b>Entpd4</b>    | <b>Gm21685</b>   |                  |                                  |                  |                 |                 | ectonucleoside triphosphate diphosphohydrolase 4//predicted gene, 21685                                                   |                                                                                                                                                                                                                                                                                                                                                                                                                                                                                                                                                                                                                                                                                                                                                                                                                                                                                                                                                                                                                                                                                                                                                                                                                                                                                                                                                                                                                                                                                                                                                                                                                                                                                                                                                                                                                                                                                                                                                                                                                                                                                                                                                                                                                                                                                                                                                                                                                                                                                                                                                                                                                                                                                                                                                                                                                                                                                                                                                                                                                                                                                                                                                                                                                                                                                                                                                                                                                                                                                                                                                                                                                                                                                                                                                                                                                                                                                                                                           |
| 2.19E-04  | NM_001270    | -1.33 | <b>Plac9a</b>    | <b>Plac9b</b>    |                  |                                  |                  |                 |                 | placenta specific 9a//placenta specific 9b                                                                                |                                                                                                                                                                                                                                                                                                                                                                                                                                                                                                                                                                                                                                                                                                                                                                                                                                                                                                                                                                                                                                                                                                                                                                                                                                                                                                                                                                                                                                                                                                                                                                                                                                                                                                                                                                                                                                                                                                                                                                                                                                                                                                                                                                                                                                                                                                                                                                                                                                                                                                                                                                                                                                                                                                                                                                                                                                                                                                                                                                                                                                                                                                                                                                                                                                                                                                                                                                                                                                                                                                                                                                                                                                                                                                                                                                                                                                                                                                                                           |
| 0.0069225 | NM_016668    | -1.33 | <b>Bhmt</b>      |                  |                  |                                  |                  |                 |                 | betaine-homocysteine methyltransferase                                                                                    |                                                                                                                                                                                                                                                                                                                                                                                                                                                                                                                                                                                                                                                                                                                                                                                                                                                                                                                                                                                                                                                                                                                                                                                                                                                                                                                                                                                                                                                                                                                                                                                                                                                                                                                                                                                                                                                                                                                                                                                                                                                                                                                                                                                                                                                                                                                                                                                                                                                                                                                                                                                                                                                                                                                                                                                                                                                                                                                                                                                                                                                                                                                                                                                                                                                                                                                                                                                                                                                                                                                                                                                                                                                                                                                                                                                                                                                                                                                                           |
| 0.0120883 | NM_001285    | -1.33 | <b>Tmem33</b>    |                  |                  |                                  |                  |                 |                 | transmembrane protein 33                                                                                                  |                                                                                                                                                                                                                                                                                                                                                                                                                                                                                                                                                                                                                                                                                                                                                                                                                                                                                                                                                                                                                                                                                                                                                                                                                                                                                                                                                                                                                                                                                                                                                                                                                                                                                                                                                                                                                                                                                                                                                                                                                                                                                                                                                                                                                                                                                                                                                                                                                                                                                                                                                                                                                                                                                                                                                                                                                                                                                                                                                                                                                                                                                                                                                                                                                                                                                                                                                                                                                                                                                                                                                                                                                                                                                                                                                                                                                                                                                                                                           |

| p (WT:KO) | RefSeq Tran: FD Air | Gene Symbol                               | Gene Title                                                                         | Gene Ontology Biological Process                                                                              |
|-----------|---------------------|-------------------------------------------|------------------------------------------------------------------------------------|---------------------------------------------------------------------------------------------------------------|
| 0.015553  | NM_001111           | -1.33 <i>Cdkn1a</i>                       | cyclin-dependent kinase inhibitor 1A (P21)                                         | 0000079 // regulation of cyclin-dependent protein serine/threonine kinase activity // inferred from mutant    |
| 0.0111063 | NM_134110           | -1.33 <i>Kcne2</i>                        | potassium voltage-gated channel, Isk-related subfamily, gene 2                     | 0006810 // transport // inferred from electronic annotation//0006811 // ion transport // inferred from el     |
| 0.0097235 | NM_007638           | -1.33 <i>Cac7</i>                         | chaperonin containing Tcp1, subunit 7 (eta)                                        | 0006457 // protein folding // inferred from electronic annotation//0007339 // binding of sperm to zona p      |
| 0.0036645 | NM_013697           | -1.32 <i>Ttr</i>                          | transthyretin                                                                      | 0006810 // transport // inferred from electronic annotation//0042572 // retinol metabolic process // not      |
| 0.0049989 | NM_001111           | -1.32 <i>Igf1</i>                         | insulin-like growth factor 1                                                       | 0001649 // osteoblast differentiation // inferred from expression pattern//0001775 // cell activation // nc   |
| 0.028701  | NM_010219           | -1.32 <i>Fkbp4</i> // <i>LOC102642559</i> | FK506 binding protein 4//uncharacterized LOC102642559                              | 0000413 // protein peptidyl-prolyl isomerization // not recorded//0006457 // protein folding // inferred f    |
| 0.0193119 | NM_001281           | -1.32 <i>Ifi2712a</i>                     | interferon, alpha-inducible protein 27 like 2A                                     | 0007568 // aging // inferred from direct assay//0009615 // response to virus // inferred from direct assay    |
| 0.003145  | NM_011403           | -1.32 <i>Slc4a1</i>                       | solute carrier family 4 (anion exchanger), member 1                                | 0006810 // transport // inferred from electronic annotation//0006811 // ion transport // inferred from el     |
| 0.0022191 | NM_001081           | -1.31 <i>Mki67</i>                        | antigen identified by monoclonal antibody Ki 67                                    | 0006259 // DNA metabolic process // inferred from electronic annotation//0007126 // meiotic nuclear di        |
| 1.61E-04  | NM_010391           | -1.31 <i>H2-Q10</i>                       | histocompatibility 2, Q region locus 10                                            | 0002376 // immune system process // inferred from electronic annotation//0002474 // antigen processin         |
| 0.0242281 | NM_021384           | -1.31 <i>Rsad2</i>                        | radical S-adenosyl methionine domain containing 2                                  | 0001503 // ossification // not recorded//0002376 // immune system process // inferred from electronic a       |
| 6.87E-04  | NM_009978           | -1.30 <i>Cst8</i>                         | cystatin 8 (cystatin-related epididymal spermatogenic)                             | 0010466 // negative regulation of peptidase activity // inferred from electronic annotation//0010951 // n     |
| 0.0100065 | NM_009912           | -1.30 <i>Ccr1</i>                         | chemokine (C-C motif) receptor 1                                                   | 0006816 // calcium ion transport // not recorded//0006874 // cellular calcium ion homeostasis // not rec      |
| 0.009008  | NM_027959           | -1.30 <i>Pdia6</i>                        | protein disulfide isomerase associated 6                                           | 0006457 // protein folding // not recorded//0008152 // metabolic process // inferred from electronic ann      |
| 0.0062015 | NM_001110           | -1.30 <i>Apoc1</i>                        | apolipoprotein C-1                                                                 | 0006641 // triglyceride metabolic process // inferred from mutant phenotype//0006810 // transport // ini      |
| 0.0108044 | NM_0011631          | -1.29 <i>Hsp90b1</i>                      | heat shock protein 90, beta (Grp94), member 1                                      | 0001666 // response to hypoxia // not recorded//0006457 // protein folding // inferred from electronic ar     |
| 0.0015525 | NM_145562           | -1.29 <i>Parm1</i>                        | prostate androgen-regulated mucin-like protein 1                                   | 0051973 // positive regulation of telomerase activity // not recorded                                         |
| 0.0062092 | NM_133981           | -1.29 <i>Alg9</i>                         | asparagine-linked glycosylation 9 (alpha 1,2 mannosyltransferase)                  | 0006486 // protein glycosylation // inferred from electronic annotation//0008152 // metabolic process //      |
| 0.0070554 | NM_012006           | -1.29 <i>Acot1</i> // <i>Acot2</i>        | acyl-CoA thioesterase 1//acyl-CoA thioesterase 2                                   | 0001676 // long-chain fatty acid metabolic process // inferred from direct assay//0006637 // acyl-CoA me      |
| 0.0324248 | NM_011082           | -1.29 <i>Pigr</i>                         | polymeric immunoglobulin receptor                                                  | 0001580 // detection of chemical stimulus involved in sensory perception of bitter taste // not recorded//    |
| 0.0099119 | NM_010495           | -1.28 <i>Id1</i>                          | inhibitor of DNA binding 1                                                         | 0000122 // negative regulation of transcription from RNA polymerase II promoter // inferred from direct a     |
| 0.0085936 | NM_011568           | -1.28 <i>Alyref</i> // <i>Alyref2</i>     | Aly/REF export factor//Aly/REF export factor 2                                     | 0006397 // mRNA processing // inferred from electronic annotation//0006406 // mRNA export from nucle          |
| 0.0053837 | NM_001290           | -1.28 <i>Acer2</i>                        | alkaline ceramidase 2                                                              | 0001953 // negative regulation of cell-matrix adhesion // not recorded//0006629 // lipid metabolic proces     |
| 0.0050811 | NM_001077           | -1.28 <i>Ldb2</i>                         | LIM domain binding 2                                                               | 0001942 // hair follicle development // inferred from genetic interaction//0006357 // regulation of transc    |
| 0.0482885 | NM_133726           | -1.28 <i>St13</i>                         | suppression of tumorigenicity 13                                                   | 0006457 // protein folding // not recorded//0051260 // protein homooligomerization // not recorded//0         |
| 0.00238   | NM_013599           | -1.28 <i>Mmp9</i>                         | matrix metalloproteinase 9                                                         | 0001501 // skeletal system development // inferred from genetic interaction//0001501 // skeletal system       |
| 0.0304962 | NM_008877           | -1.27 <i>Plg</i>                          | plasminogen                                                                        | 0006508 // proteolysis // inferred from electronic annotation//0007596 // blood coagulation // not recor      |
| 0.0026767 | NM_176848           | -1.27 <i>Fbxo2</i>                        | F-box protein 2                                                                    | 0006511 // ubiquitin-dependent protein catabolic process // inferred from direct assay//0006516 // glyco      |
| 0.020154  | NM_010104           | -1.27 <i>Edn1</i>                         | endothelin 1                                                                       | 0000122 // negative regulation of transcription from RNA polymerase II promoter // not recorded//00015        |
| 0.0148855 | NM_177301           | -1.27 <i>Hnrnp1</i>                       | heterogeneous nuclear ribonucleoprotein L                                          | 0006397 // mRNA processing // inferred from electronic annotation//0034198 // cellular response to amii       |
| 0.0318101 | NM_001110           | -1.27 <i>Atp2a2</i>                       | ATPase, Ca++ transporting, cardiac muscle, slow twitch 2                           | 0002026 // regulation of the force of heart contraction // inferred from genetic interaction//0006810 // tr   |
| 0.0079441 | NM_030599           | -1.27 <i>Klrb1b</i>                       | killer cell lectin-like receptor subfamily B member 1B                             | 0045953 // negative regulation of natural killer cell mediated cytotoxicity // inferred from direct assay//0C |
| 3.66E-04  | NM_010180           | -1.27 <i>Fbln1</i>                        | fibulin 1                                                                          | 0001933 // negative regulation of protein phosphorylation // not recorded//0007162 // negative regulati       |
| 0.0053302 | NM_001163           | -1.27 <i>Clec4d</i>                       | C-type lectin domain family 4, member d                                            | 0002250 // adaptive immune response // inferred from mutant phenotype//0002292 // T cell differentiati        |
| 0.0069436 | NM_031165           | -1.27 <i>Hspa8</i>                        | heat shock protein 8                                                               | 0001916 // positive regulation of T cell mediated cytotoxicity // not recorded//0006351 // transcription, T   |
| 0.0062382 | NM_029620           | -1.27 <i>Pcolce2</i>                      | procollagen C-endopeptidase enhancer 2                                             | 0010952 // positive regulation of peptidase activity // not recorded                                          |
| 0.0100064 | NM_001190           | -1.26 <i>Clec4n</i>                       | C-type lectin domain family 4, member n                                            | 0002250 // adaptive immune response // inferred from electronic annotation//0002376 // immune system          |
| 0.0332937 | NM_007743           | -1.26 <i>Col1a2</i>                       | collagen, type I, alpha 2                                                          | 0001501 // skeletal system development // not recorded//0001568 // blood vessel development // not re         |
| 1.33E-04  | NM_145923           | -1.26 <i>Rel1</i>                         | REL1-like 1                                                                        |                                                                                                               |
| 4.32E-04  | NM_021789           | -1.26 <i>Trappc4</i>                      | trafficking protein particle complex 4                                             | 0006810 // transport // inferred from electronic annotation//0006888 // ER to Golgi vesicle-mediated tra      |
| 0.0035458 | NM_011545           | -1.26 <i>Tcf21</i>                        | transcription factor 21                                                            | 0000122 // negative regulation of transcription from RNA polymerase II promoter // inferred from direct a     |
| 3.99E-04  | NM_001289           | -1.26 <i>Cryab</i>                        | crystallin, alpha B                                                                | 0001666 // response to hypoxia // inferred from mutant phenotype//0002088 // lens development in can          |
| 0.0049088 | NM_008083           | -1.26 <i>Gap43</i>                        | growth associated protein 43                                                       | 0007275 // multicellular organismal development // inferred from electronic annotation//0007399 // ner        |
| 0.0074224 | NM_001271           | -1.26 <i>Ackr3</i>                        | atypical chemokine receptor 3                                                      | 0001525 // angiogenesis // inferred from electronic annotation//0001570 // vasculogenesis // inferred fro     |
| 0.0291845 | NM_001163           | -1.26 <i>Tcf19</i>                        | transcription factor 19                                                            |                                                                                                               |
| 0.0014895 | NM_010511           | -1.26 <i>Ifng1</i>                        | interferon gamma receptor 1                                                        | 0019221 // cytokine-mediated signaling pathway // not recorded                                                |
| 0.0090109 | NM_009850           | -1.25 <i>Cd3g</i>                         | CD3 antigen, gamma polypeptide                                                     | 0007163 // establishment or maintenance of cell polarity // not recorded//0007166 // cell surface recept      |
| 0.0149551 | NM_001145           | -1.25 <i>Zkscan3</i>                      | zinc finger with KRAB and SCAN domains 3                                           | 0000122 // negative regulation of transcription from RNA polymerase II promoter // not recorded//00063        |
| 0.0480251 | NM_008039           | -1.25 <i>Fpr2</i>                         | formyl peptide receptor 2                                                          | 0006935 // chemotaxis // inferred from electronic annotation//0007165 // signal transduction // inferre       |
| 0.0227478 | NM_001190           | -1.25 <i>Dnajb11</i>                      | Dnaj (Hsp40) homolog, subfamily B, member 11                                       | 0006457 // protein folding // inferred from electronic annotation//0016556 // mRNA modification // infer      |
| 0.0030634 | NM_027411           | -1.25 <i>Spd1</i>                         | spindle apparatus coiled-coil protein 1                                            | 0000132 // establishment of mitotic spindle orientation // not recorded//0007049 // cell cycle // inferre     |
| 0.0459714 | NM_138953           | -1.24 <i>Elf2</i>                         | elongation factor RNA polymerase II 2                                              | 0006351 // transcription, DNA-templated // inferred from electronic annotation//0006355 // regulation o       |
| 0.0111285 | NM_001285           | -1.24 <i>Dapk1</i>                        | death associated protein kinase 1                                                  | 0006417 // regulation of translation // inferred from electronic annotation//0006468 // protein phosphor      |
| 0.0080922 | NM_024263           | -1.24 <i>Mxra8</i>                        | matrix-remodelling associated 8                                                    | 0006857 // establishment of glial blood-brain barrier // inferred from expression pattern                     |
| 3.25E-04  | NM_007875           | -1.24 <i>Dpagt1</i>                       | dolichyl-phosphate (UDP-N-acetylglucosamine) acetylglucosaminophosphotransferase 1 | 0000271 // polysaccharide biosynthetic process // --//0006047 // UDP-N-acetylglucosamine metabolic pr         |
| 0.0014476 | NM_011609           | -1.24 <i>Tnfrsf1a</i>                     | tumor necrosis factor receptor superfamily, member 1a                              | 0006693 // prostaglandin metabolic process // traceable author statement//0006915 // apoptotic proces         |
| 0.0010342 | NM_026347           | -1.24 <i>Iah1</i>                         | isoamyl acetate-hydrolyzing esterase 1 homolog (S. cerevisiae)                     | 0006629 // lipid metabolic process // inferred from electronic annotation//0016042 // lipid catabolic proc    |
| 0.0031938 | NM_015814           | -1.24 <i>Dkk3</i>                         | dickkopf homolog 3 (Xenopus laevis)                                                | 0007275 // multicellular organismal development // inferred from electronic annotation//0016055 // Wn         |
| 0.0154652 | NM_009943           | -1.24 <i>Cox6a2</i>                       | cytochrome c oxidase subunit VIa polypeptide 2                                     | 1902600 // hydrogen ion transmembrane transport // inferred from electronic annotation                        |
| 7.62E-04  | NM_011280           | -1.24 <i>Trim10</i>                       | tripartite motif-containing 10                                                     | 0030218 // erythrocyte differentiation // inferred from direct assay//0045087 // innate immune response       |
| 9.96E-04  | NM_011610           | -1.23 <i>Tnfrsf1b</i>                     | tumor necrosis factor receptor superfamily, member 1b                              | 0006954 // inflammatory response // inferred from mutant phenotype//0006955 // immune response // i           |
| 0.0017916 | NM_001243           | -1.23 <i>Tspan2</i>                       | tetraspanin 2                                                                      | 0006954 // inflammatory response // inferred from genetic interaction//0007166 // cell surface receptor :     |
| 0.0033299 | NM_133238           | -1.23 <i>Cd209a</i>                       | CD209a antigen                                                                     | 0006897 // endocytosis // inferred from electronic annotation//0010468 // regulation of gene expression       |
| 0.0230947 | NM_012042           | -1.23 <i>Cul1</i>                         | cullin 1                                                                           | 0006511 // ubiquitin-dependent protein catabolic process // inferred by curator//0006513 // protein mor       |
| 0.0039434 | NM_013691           | -1.23 <i>Thbs3</i>                        | thrombospondin 3                                                                   | 0003417 // growth plate cartilage development // inferred from genetic interaction//0003417 // growth p       |
| 9.48E-04  | NM_001034           | -1.23 <i>Ppp2r1b</i>                      | protein phosphatase 2, regulatory subunit A, beta                                  | 0006461 // protein complex assembly // inferred from electronic annotation//0034047 // regulation of pr       |

| p (WT:KO) | RefSeq Tran: FD Air | Gene Symbol                          | Gene Title                                                                    | Gene Ontology Biological Process                                                                               |
|-----------|---------------------|--------------------------------------|-------------------------------------------------------------------------------|----------------------------------------------------------------------------------------------------------------|
| 0.0048828 | NM_0010181          | -1.22 <i>Palld</i>                   | palladin, cytoskeletal associated protein                                     | 0003334 // keratinocyte development // inferred from mutant phenotype//0003382 // epithelial cell mor          |
| 0.00257   | NM_019707           | -1.22 <i>Cdh13</i>                   | cadherin 13                                                                   | 0000278 // mitotic cell cycle // inferred from electronic annotation//0001558 // regulation of cell growth     |
| 0.0406531 | NM_007865           | -1.22 <i>Dll1</i>                    | delta-like 1 (Drosophila)                                                     | 0001701 // in utero embryonic development // non-traceable author statement//0001756 // somitogeny             |
| 7.90E-04  | NM_007825           | -1.22 <i>Cyp7b1</i>                  | cytochrome P450, family 7, subfamily b, polypeptide 1                         | 0006629 // lipid metabolic process // inferred from electronic annotation//0006699 // bile acid biosynthe      |
| 0.038422  | NM_008720           | -1.22 <i>Npc1</i>                    | Niemann-Pick type C1                                                          | 0006486 // protein glycosylation // inferred from direct assay//0006486 // protein glycosylation // not rec    |
| 0.0085297 | NM_025348           | -1.22 <i>Ndufa3</i>                  | NADH dehydrogenase (ubiquinone) 1 alpha subcomplex, 3                         | 0006810 // transport // inferred from electronic annotation//0005514 // oxidation-reduction process // ir      |
| 0.0079752 | NM_021288           | -1.22 <i>Tyms//Tyms-ps</i>           | thymidylate synthase//thymidylate synthase, pseudogene                        | 0006206 // pyrimidine nucleobase metabolic process // inferred from electronic annotation//0006231 // r        |
| 0.0424505 | NM_013542           | -1.22 <i>Gzmb</i>                    | granzyme B                                                                    | 0001913 // T cell mediated cytotoxicity // inferred from mutant phenotype//0006508 // proteolysis // inf       |
| 0.0278048 | NM_008929           | -1.22 <i>Dnajc3</i>                  | Dnaj (Hsp40) homolog, subfamily C, member 3                                   | 0006469 // negative regulation of protein kinase activity // inferred from sequence or structural similarity// |
| 0.0167853 | NM_009131           | -1.22 <i>Clec11a</i>                 | C-type lectin domain family 11, member a                                      | 0008284 // positive regulation of cell proliferation // not recorded                                           |
| 0.0069927 | NM_009763           | -1.22 <i>Bst1</i>                    | bone marrow stromal cell antigen 1                                            | 0008152 // metabolic process // not recorded//0030890 // positive regulation of B cell proliferation // no     |
| 0.0065881 | NM_028394           | -1.22 <i>Hspb11</i>                  | heat shock protein family B (small), member 11                                | 0001501 // skeletal system development // inferred from mutant phenotype//0006810 // transport // inf          |
| 0.0022784 | NM_012033           | -1.22 <i>Tinag</i>                   | tubulointerstitial nephritis antigen                                          | 0006508 // proteolysis // inferred from electronic annotation//0006898 // receptor-mediated endocytosis        |
| 0.0043699 | NM_011794           | -1.21 <i>Bpnt1</i>                   | bisphosphate 3'-nucleotidase 1                                                | 0006139 // nucleobase-containing compound metabolic process // not recorded//0006470 // protein dep            |
| 0.0057984 | NM_009829           | -1.21 <i>Ccnd2</i>                   | cyclin D2                                                                     | 0000082 // G1/S transition of mitotic cell cycle // not recorded//0001934 // positive regulation of protein    |
| 0.011662  | NM_010369           | -1.21 <i>Gypa</i>                    | glycophorin A                                                                 | 0007016 // cytoskeletal anchoring at plasma membrane // inferred from mutant phenotype//0047484 //             |
| 0.0352691 | NM_001166           | -1.21 <i>Fkbp2</i>                   | FK506 binding protein 2                                                       | 0000413 // protein peptidyl-prolyl isomerization // not recorded//0006457 // protein folding // inferred f     |
| 0.031296  | NM_009627           | -1.21 <i>Adm</i>                     | adrenomedullin                                                                | 0001570 // vasculogenesis // not recorded//0001666 // response to hypoxia // inferred from electronic ar       |
| 0.0118508 | NM_026602           | -1.21 <i>Bcas2</i>                   | breast carcinoma amplified sequence 2                                         | 0000398 // mRNA splicing, via spliceosome // not recorded//0006397 // mRNA processing // inferred from         |
| 0.0019934 | NM_025319           | -1.21 <i>0610009B22Rik</i>           | RIKEN cDNA 0610009B22 gene                                                    | 0006351 // transcription, DNA-templated // inferred from electronic annotation//0006355 // regulation o        |
| 0.0385818 | NM_016752           | -1.21 <i>Slc35b1</i>                 | solute carrier family 35, member B1                                           | 0006810 // transport // inferred from electronic annotation//0008643 // carbohydrate transport // infer        |
| 0.0061123 | NM_001252           | -1.21 <i>Csf3r</i>                   | colony stimulating factor 3 receptor (granulocyte)                            | 0007155 // cell adhesion // inferred from electronic annotation//0019221 // cytokine-mediated signaling        |
| 0.032887  | NM_001305           | -1.21 <i>Apoe</i>                    | apolipoprotein E                                                              | 0001937 // negative regulation of endothelial cell proliferation // not recorded//0002021 // response to d     |
| 0.0259667 | NM_177564           | -1.21 <i>Dhrs11</i>                  | dehydrogenase/reductase (SDR family) member 11                                | 0008152 // metabolic process // inferred from electronic annotation//0005514 // oxidation-reduction pro        |
| 0.0101478 | NM_028176           | -1.21 <i>Cda</i>                     | cytidine deaminase                                                            | 0009972 // cytidine deamination // not recorded//0030308 // negative regulation of cell growth // not re       |
| 0.0017991 | NM_001135           | -1.20 <i>Gm38718//Gm39869//Ptpri</i> | predicted gene, 38718//predicted gene, 39869//protein tyrosine phosphatase    | 0001570 // vasculogenesis // inferred from mutant phenotype//0001954 // positive regulation of cell-mat        |
| 0.0176624 | NM_133198           | -1.20 <i>Pygl</i>                    | liver glycogen phosphorylase                                                  | 0005975 // carbohydrate metabolic process // inferred from electronic annotation//0005977 // glycogen m        |
| 0.0018152 | NM_001113           | -1.20 <i>Isg20</i>                   | interferon-stimulated protein                                                 | 0000738 // DNA catabolic process, exonucleolytic // not recorded//0002376 // immune system process //          |
| 0.0045163 | NM_016696           | -1.20 <i>Gpc1</i>                    | glypican 1                                                                    | 0014037 // Schwann cell differentiation // not recorded//0030200 // heparan sulfate proteoglycan catab         |
| 0.0300747 | NM_134188           | -1.20 <i>Acot2//Acot1</i>            | acyl-CoA thioesterase 2//acyl-CoA thioesterase 1                              | 0000038 // very long-chain fatty acid metabolic process // not recorded//0001666 // response to hypoxia        |
| 0.0155165 | NM_010006           | -1.20 <i>Cyp2d9</i>                  | cytochrome P450, family 2, subfamily d, polypeptide 9                         | 0006805 // xenobiotic metabolic process // not recorded//0019369 // arachidonic acid metabolic process         |
| 0.0349869 | NM_018870           | -1.20 <i>Pgam2</i>                   | phosphoglycerate mutase 2                                                     | 0006094 // gluconeogenesis // not recorded//0006096 // glycolytic process // inferred from direct assay//      |
| 0.0253425 | NM_008611           | -1.20 <i>Mmp8</i>                    | matrix metalloproteinase 8                                                    | 0006508 // proteolysis // not recorded//0030574 // collagen catabolic process // inferred from electronic      |
| 0.0043765 | NM_001033           | -1.20 <i>Dnah1</i>                   | dynein, axonemal, heavy chain 1                                               | 0003341 // cilium movement // inferred from electronic annotation//0003351 // epithelial cilium movem          |
| 0.0235566 | NM_019474           | -1.20 <i>Olfir156</i>                | olfactory receptor 156                                                        | 0007165 // signal transduction // inferred from electronic annotation//0007186 // G-protein coupled rec        |
| 0.0323284 | NM_146167           | -1.20 <i>Gimap7</i>                  | GPase, IMAP family member 7                                                   | 0008152 // metabolic process // inferred from electronic annotation                                            |
| 0.0397775 | NM_001004           | -1.20 <i>Grasp1</i>                  | G protein-coupled receptor associated sorting protein 1                       | 0008333 // endosome to lysosome transport // not recorded//1990172 // G-protein coupled receptor cat           |
| 0.0145098 | NM_025569           | -1.20 <i>Mgst3</i>                   | microsomal glutathione S-transferase 3                                        | 0010243 // response to organonitrogen compound // inferred from electronic annotation//0005514 // ox           |
| 0.0043618 | NM_019791           | -1.20 <i>Maged1</i>                  | melanoma antigen, family D, 1                                                 | 0006357 // regulation of transcription from RNA polymerase II promoter // inferred from direct assay//00       |
| 0.0215543 | NM_029614           | -1.20 <i>Prss23</i>                  | protease, serine 23                                                           | 0006508 // proteolysis // inferred from electronic annotation                                                  |
| 0.0342132 | NM_001308           | -1.20 <i>Alox5ap</i>                 | arachidonate 5-lipoxygenase activating protein                                | 0002540 // leukotriene production involved in inflammatory response // inferred from mutant phenotype//        |
| 0.0384087 | NM_010942           | -1.20 <i>Nsg1</i>                    | neuron specific gene family member 1                                          | 0001921 // positive regulation of receptor recycling // not recorded//0007212 // dopamine receptor sign        |
| 0.0061579 | NM_001002           | -1.20 <i>Hspa2</i>                   | heat shock protein 2                                                          | 0001934 // positive regulation of protein phosphorylation // inferred from mutant phenotype//0007140 //        |
| 0.0094518 | NM_001169           | 1.20 <i>B3gnt2</i>                   | UDP-GlcNAc:betaGal beta-1,3-N-acetylglucosaminyltransferase 2                 | 0006486 // protein glycosylation // inferred from mutant phenotype//0007411 // axon guidance // infer          |
| 0.002047  | NM_012017           | 1.20 <i>Zfp346</i>                   | zinc finger protein 346                                                       | 0043065 // positive regulation of apoptotic process // inferred from mutant phenotype//0072332 // intrin       |
| 0.0225771 | NM_144796           | 1.20 <i>Susd4</i>                    | sushi domain containing 4                                                     | 0030449 // regulation of complement activation // not recorded//0045957 // negative regulation of comp         |
| 0.022997  | NM_001110           | 1.20 <i>Lsm2</i>                     | LSM2 homolog, U6 small nuclear RNA associated (S. cerevisiae)                 | 0000244 // spliceosomal tri-snRNP complex assembly // not recorded//0000398 // mRNA splicing, via spli         |
| 0.0328204 | NM_175309           | 1.20 <i>Upk3b</i>                    | uroplakin 3B                                                                  | 0010629 // negative regulation of gene expression // not recorded//0046325 // negative regulation of glu       |
| 0.0172706 | NM_172645           | 1.20 <i>Suco</i>                     | SUN domain containing ossification factor                                     | 0001503 // ossification // inferred from electronic annotation//0007275 // multicellular organismal devel      |
| 0.0197225 | NM_010361           | 1.20 <i>Gstt2</i>                    | glutathione S-transferase, theta 2                                            | 0006749 // glutathione metabolic process // not recorded//0005514 // oxidation-reduction process // not        |
| 0.0120097 | NM_001005           | 1.20 <i>Syne2</i>                    | spectrin repeat containing, nuclear envelope 2                                | 0006998 // nuclear envelope organization // inferred from mutant phenotype//0007097 // nuclear migrat          |
| 0.0027919 | NM_001079           | 1.20 <i>Srsf5</i>                    | serine/arginine-rich splicing factor 5                                        | 0006351 // transcription, DNA-templated // inferred from electronic annotation//0006355 // regulation o        |
| 0.0019571 | NM_001098           | 1.20 <i>Hic1</i>                     | hypermethylated in cancer 1                                                   | 0000122 // negative regulation of transcription from RNA polymerase II promoter // inferred from direct a      |
| 0.0101649 | NM_007426           | 1.20 <i>Angpt2</i>                   | angiotensin 2                                                                 | 0001525 // angiogenesis // inferred from genetic interaction//0001666 // response to hypoxia // inferred       |
| 9.43E-04  | NM_133677           | 1.20 <i>Zbtb11os1</i>                | zinc finger and BTB domain containing 11, opposite strand 1                   |                                                                                                                |
| 0.0123404 | NM_153533           | 1.20 <i>Tns2</i>                     | tensin 2                                                                      | 0001822 // kidney development // inferred from mutant phenotype//0006470 // protein dephosphorylati            |
| 6.32E-04  | NM_010593           | 1.20 <i>Jup</i>                      | junction plakoglobin                                                          | 0002159 // desmosome assembly // inferred from mutant phenotype//0002159 // desmosome assembly,                |
| 0.013172  | NM_001164           | 1.20 <i>Hspb2</i>                    | heat shock protein 2                                                          | 0007525 // somatic muscle development // inferred from genetic interaction//0009408 // response to he          |
| 0.0280921 | NM_001164           | 1.21 <i>Sptsb</i>                    | serine palmitoyltransferase, small subunit B                                  | 0006629 // lipid metabolic process // inferred from electronic annotation//0006665 // sphingolipid metat       |
| 0.0086943 | NM_133710           | 1.21 <i>Ctdsp1</i>                   | CTD (carboxy-terminal domain, RNA polymerase II, polypeptide A) small phospho | 0001933 // negative regulation of protein phosphorylation // inferred from direct assay//0006470 // prot       |
| 0.0100975 | NM_010798           | 1.21 <i>Mif</i>                      | macrophage migration inhibitory factor                                        | 0001516 // prostaglandin biosynthetic process // not recorded//0001934 // positive regulation of protein       |
| 0.0072266 | NM_138683           | 1.21 <i>Rspo1</i>                    | R-spondin 1                                                                   | 0001934 // positive regulation of protein phosphorylation // not recorded//0002090 // regulation of rece       |
| 0.0197331 | NM_153459           | 1.21 <i>Dusp7</i>                    | dual specificity phosphatase 7                                                | 0000188 // inactivation of MAPK activity // not recorded//0006470 // protein dephosphorylation // not rec      |
| 0.028392  | NM_001308           | 1.21 <i>Porcn</i>                    | porcupine homolog (Drosophila)                                                | 0006497 // protein lipidation // inferred from direct assay//0009100 // glycoprotein metabolic process //      |
| 8.86E-04  | NM_008027           | 1.21 <i>Flot1</i>                    | flotillin 1                                                                   | 0001765 // membrane raft assembly // not recorded//0001819 // positive regulation of cytokine product          |
| 0.0051718 | NM_001284           | 1.21 <i>Bcl2l11</i>                  | BCL2-like 11 (apoptosis facilitator)                                          | 0001701 // in utero embryonic development // inferred from genetic interaction//0001776 // leukocyte h         |

| p (WT:KO) | RefSeq Tran: FD Air | Gene Symbol           | Gene Title                                                                      | Gene Ontology Biological Process                                                                             |
|-----------|---------------------|-----------------------|---------------------------------------------------------------------------------|--------------------------------------------------------------------------------------------------------------|
| 0.0040917 | NM_001163           | 1.21 <i>Fbxo6</i>     | F-box protein 6                                                                 | 0006281 // DNA repair // inferred from electronic annotation///0006516 // glycoprotein catabolic process     |
| 0.0011939 | NM_173440           | 1.21 <i>Nrip1</i>     | nuclear receptor interacting protein 1                                          | 0000122 // negative regulation of transcription from RNA polymerase II promoter // inferred from direct a    |
| 0.0103284 | NM_001164           | 1.21 <i>Pias2</i>     | protein inhibitor of activated STAT 2                                           | 0006351 // transcription, DNA-templated // inferred from direct assay///0006355 // regulation of transcrip   |
| 0.0066668 | NM_001111           | 1.21 <i>Ngef</i>      | neuronal guanine nucleotide exchange factor                                     | 0007275 // multicellular organismal development // inferred from electronic annotation///0007399 // ner      |
| 7.45E-04  | NM_001272           | 1.22 <i>Trim24</i>    | tripartite motif-containing 24                                                  | 0006351 // transcription, DNA-templated // inferred from electronic annotation///0006355 // regulation o     |
| 0.0022797 | NM_027198           | 1.21 <i>Zswim7</i>    | zinc finger SWIM-type containing 7                                              | 0000724 // double-strand break repair via homologous recombination // not recorded///0006281 // DNA r        |
| 0.0293327 | NM_001083           | 1.21 <i>Scn3b</i>     | sodium channel, voltage-gated, type III, beta                                   | 0006810 // transport // inferred from electronic annotation///0006811 // ion transport // inferred from el   |
| 0.0227504 | NM_153789           | 1.22 <i>Myliip</i>    | myosin regulatory light chain interacting protein                               | 0006928 // movement of cell or subcellular component // not recorded///0007399 // nervous system deve        |
| 0.0162668 | NM_138951           | 1.22 <i>Ttc36</i>     | tetratricopeptide repeat domain 36                                              |                                                                                                              |
| 0.0072588 | NM_009759           | 1.22 <i>Bmx</i>       | BMX non-receptor tyrosine kinase                                                | 0002250 // adaptive immune response // not recorded///0006468 // protein phosphorylation // inferred f       |
| 0.0370463 | NM_007974           | 1.22 <i>F2r1l</i>     | coagulation factor II (thrombin) receptor-like 1                                | 0002286 // T cell activation involved in immune response // inferred from direct assay///0002376 // immu     |
| 0.0153785 | NM_008012           | 1.22 <i>Akr1b8</i>    | aldo-keto reductase family 1, member B8                                         | 0016488 // farnesol catabolic process // not recorded///0044597 // daunorubicin metabolic process // not     |
| 0.0082785 | NM_145403           | 1.22 <i>Tmprss4</i>   | transmembrane protease, serine 4                                                | 0006508 // proteolysis // inferred from electronic annotation///0006898 // receptor-mediated endocytosis     |
| 0.0197822 | NM_027168           | 1.22 <i>Hddc2</i>     | HD domain containing 2                                                          |                                                                                                              |
| 0.0085118 | NM_026058           | 1.22 <i>Cers4</i>     | ceramide synthase 4                                                             | 0006629 // lipid metabolic process // inferred from electronic annotation///0030148 // sphingolipid biosyr   |
| 6.43E-04  | NM_030206           | 1.22 <i>Cygb</i>      | cytoglobin                                                                      | 0001666 // response to hypoxia // inferred from electronic annotation///0006810 // transport // inferred f   |
| 0.0020733 | NM_001199           | 1.22 <i>Prrc2a</i>    | proline-rich coiled-coil 2A                                                     |                                                                                                              |
| 0.0011858 | NM_172736           | 1.22 <i>Leng8</i>     | leukocyte receptor cluster (LRC) member 8                                       |                                                                                                              |
| 0.0173041 | NM_027356           | 1.22 <i>Ufsp1</i>     | UFM1-specific peptidase 1                                                       | 0006508 // proteolysis // inferred from mutant phenotype                                                     |
| 0.0067067 | NM_001025           | 1.23 <i>Brd2</i>      | bromodomain containing 2                                                        | 0006334 // nucleosome assembly // not recorded///0006351 // transcription, DNA-templated // inferred f       |
| 0.0075527 | NM_001122           | 1.23 <i>Nab2</i>      | Ngfi-A binding protein 2                                                        | 0001958 // endochondral ossification // inferred from genetic interaction///0006351 // transcription, DNA    |
| 0.0410965 | NM_009344           | 1.23 <i>Phlda1</i>    | pleckstrin homology-like domain, family A, member 1                             | 0006915 // apoptotic process // inferred from electronic annotation///0021879 // forebrain neuron differe    |
| 0.0465258 | NM_001110           | 1.23 <i>Prg4</i>      | proteoglycan 4 (megakaryocyte stimulating factor, articular superficial zone p  | 0006898 // receptor-mediated endocytosis // inferred from electronic annotation///0006955 // immune re       |
| 0.0021794 | NM_033314           | 1.23 <i>Slco2a1</i>   | solute carrier organic anion transporter family, member 2a1                     | 0006810 // transport // inferred from electronic annotation///0006811 // ion transport // inferred from el   |
| 0.0165178 | NM_153175           | 1.23 <i>Gimap6</i>    | GTase, IMAP family member 6                                                     |                                                                                                              |
| 0.0078029 | NM_001289           | 1.23 <i>Per3</i>      | period circadian clock 3                                                        | 0000122 // negative regulation of transcription from RNA polymerase II promoter // inferred from direct a    |
| 0.0044302 | NM_018856           | 1.23 <i>Ccnl2</i>     | cyclin L2                                                                       | 0000079 // regulation of cyclin-dependent protein serine/threonine kinase activity // inferred from electri  |
| 0.0029783 | NM_019518           | 1.23 <i>Grasp</i>     | GRP1 (general receptor for phosphoinositides 1)-associated scaffold protein     | 0006886 // intracellular protein transport // not recorded///0007165 // signal transduction // inferred fr   |
| 0.0027706 | NM_001038           | 1.23 <i>Sertad2</i>   | SERTA domain containing 2                                                       | 0006351 // transcription, DNA-templated // inferred from electronic annotation///0006355 // regulation o     |
| 0.0058051 | NM_145478           | 1.23 <i>Pim3</i>      | proviral integration site 3                                                     | 0006468 // protein phosphorylation // not recorded///0006915 // apoptotic process // inferred from elect     |
| 0.001162  | NM_009201           | 1.24 <i>Slc1a5</i>    | solute carrier family 1 (neutral amino acid transporter), member 5              | 0003333 // amino acid transmembrane transport // not recorded///0006810 // transport // inferred from i      |
| 0.0014692 | NM_001013           | 1.24 <i>Prkg1</i>     | protein kinase, cGMP-dependent, type I                                          | 0001764 // neuron migration // inferred from mutant phenotype///0006468 // protein phosphorylation //        |
| 0.0149314 | NM_001161           | 1.24 <i>Tnfrsf12a</i> | tumor necrosis factor receptor superfamily, member 12a                          | 0001525 // angiogenesis // inferred from electronic annotation///0006915 // apoptotic process // inferred    |
| 0.0016175 | NM_023831           | 1.24 <i>Ifi46</i>     | intraflagellar transport 46                                                     | 0007224 // smoothed signaling pathway // inferred from mutant phenotype///0015031 // protein trans           |
| 0.0088693 | NM_008256           | 1.24 <i>Hmgcs2</i>    | 3-hydroxy-3-methylglutaryl-Coenzyme A synthase 2                                | 0001822 // kidney development // inferred from electronic annotation///0001889 // liver development //       |
| 0.0361806 | NM_001289           | 1.24 <i>Zeb2</i>      | zinc finger E-box binding homeobox 2                                            | 0000122 // negative regulation of transcription from RNA polymerase II promoter // inferred from mutant      |
| 0.0309031 | NM_026573           | 1.24 <i>Upf3b</i>     | UPF3 regulator of nonsense transcripts homolog B (yeast)                        | 0000184 // nuclear-transcribed mRNA catabolic process, nonsense-mediated decay // not recorded///0006        |
| 0.0055189 | NM_001289           | 1.24 <i>Tns1</i>      | tensin 1                                                                        | 0007044 // cell-substrate junction assembly // inferred from mutant phenotype///0010761 // fibroblast mi     |
| 0.0014352 | NM_001114           | 1.24 <i>Slc16a11</i>  | solute carrier family 16 (monocarboxylic acid transporters), member 11          | 0006629 // lipid metabolic process // not recorded///0006810 // transport // inferred from electronic ann    |
| 0.0078167 | NM_172563           | 1.24 <i>Hif</i>       | hepatic leukemia factor                                                         | 0006351 // transcription, DNA-templated // inferred from electronic annotation///0006355 // regulation o     |
| 0.0049926 | NM_175030           | 1.24 <i>Tctex1d4</i>  | Tctex1 domain containing 4                                                      |                                                                                                              |
| 0.0017945 | NM_178931           | 1.24 <i>Tnfrsf14</i>  | tumor necrosis factor receptor superfamily, member 14 (herpesvirus entry me     | 0002741 // positive regulation of cytokine secretion involved in immune response // inferred from mutant     |
| 4.30E-04  | NM_007885           | 1.24 <i>Slc26a2</i>   | solute carrier family 26 (sulfate transporter), member 2                        | 0001503 // ossification // not recorded///0006810 // transport // inferred from electronic annotation///00   |
| 0.0016893 | NM_007964           | 1.25 <i>Evi5</i>      | ecotropic viral integration site 5                                              | 0007049 // cell cycle // inferred from electronic annotation///0042147 // retrograde transport, endosome     |
| 9.56E-04  | NM_145828           | 1.25 <i>Xylt2</i>     | xylosyltransferase II                                                           | 0006024 // glycosaminoglycan biosynthetic process // inferred from mutant phenotype///0015012 // hepa        |
| 0.0114493 | NM_145549           | 1.25 <i>Efcab7</i>    | EF-hand calcium binding domain 7                                                |                                                                                                              |
| 0.0028765 | NM_001290           | 1.25 <i>Eps8l1</i>    | EPS8-like 1                                                                     | 0007266 // Rho protein signal transduction // not recorded///0016601 // Rac protein signal transduction /    |
| 0.03092   | NM_028136           | 1.25 <i>Dhx36</i>     | DEAH (Asp-Glu-Ala-His) box polypeptide 36                                       | 0001503 // ossification // inferred from mutant phenotype///0006351 // transcription, DNA-templated // i     |
| 0.0276244 | NM_145220           | 1.25 <i>App12</i>     | adaptor protein, phosphotyrosine interaction, PH domain and leucine zipper      | 0007049 // cell cycle // inferred from electronic annotation///0008283 // cell proliferation // not recorded |
| 3.30E-04  | NM_024472           | 1.25 <i>Cptp</i>      | ceramide-1-phosphate transfer protein                                           | 0006810 // transport // inferred from electronic annotation///0006869 // lipid transport // inferred from e  |
| 0.0017087 | NM_018874           | 1.25 <i>Pnliprp1</i>  | pancreatic lipase related protein 1                                             | 0006629 // lipid metabolic process // inferred from electronic annotation                                    |
| 6.80E-04  | NM_001161           | 1.25 <i>Gucy1b3</i>   | guanylate cyclase 1, soluble, beta 3                                            | 0006182 // cGMP biosynthetic process // not recorded///0007165 // signal transduction // not recorded//      |
| 7.54E-04  | NM_001302           | 1.26 <i>Impdh1</i>    | inosine 5'-phosphate dehydrogenase 1                                            | 0006164 // purine nucleotide biosynthetic process // inferred from mutant phenotype///0006177 // GMP I       |
| 0.0092268 | NM_001277           | 1.26 <i>Acrv1l</i>    | activin A receptor, type II-like 1                                              | 0001525 // angiogenesis // inferred from mutant phenotype///0001525 // angiogenesis // not recorded///       |
| 0.0150706 | NM_019864           | 1.26 <i>Atr</i>       | ataxia telangiectasia and Rad3 related                                          | 0000077 // DNA damage checkpoint // inferred from mutant phenotype///0000077 // DNA damage checkp            |
| 0.0017954 | NM_133772           | 1.26 <i>Ssbp4</i>     | single stranded DNA binding protein 4                                           |                                                                                                              |
| 0.0015706 | NM_013770           | 1.26 <i>Slc25a10</i>  | solute carrier family 25 (mitochondrial carrier, dicarboxylate transporter), me | 0006810 // transport // inferred from electronic annotation///0006817 // phosphate ion transport // not r    |
| 0.0040538 | NM_017398           | 1.26 <i>Diaph2</i>    | diaphanous related formin 2                                                     | 0007015 // actin filament organization // inferred from electronic annotation///0007275 // multicellular o   |
| 0.0012928 | NM_008344           | 1.26 <i>Igfbp6</i>    | insulin-like growth factor binding protein 6                                    | 0001558 // regulation of cell growth // inferred from electronic annotation///0043567 // regulation of insu  |
| 0.0052937 | NM_001174           | 1.26 <i>Camk2b</i>    | calcium/calmodulin-dependent protein kinase II, beta                            | 0000082 // G1/S transition of mitotic cell cycle // inferred from mutant phenotype///0002030 // inhibitory   |
| 0.0011485 | NM_011066           | 1.26 <i>Per2</i>      | period circadian clock 2                                                        | 0000122 // negative regulation of transcription from RNA polymerase II promoter // inferred from direct a    |
| 0.0015635 | NM_008197           | 1.26 <i>H1fo</i>      | H1 histone family, member 0                                                     | 0006334 // nucleosome assembly // inferred from electronic annotation                                        |
| 0.0084722 | NM_010518           | 1.26 <i>Igfbp5</i>    | insulin-like growth factor binding protein 5                                    | 0001558 // regulation of cell growth // inferred from genetic interaction///0001649 // osteoblast different  |
| 0.0033936 | NM_008416           | 1.26 <i>Junb</i>      | jun B proto-oncogene                                                            | 0000122 // negative regulation of transcription from RNA polymerase II promoter // not recorded///00015      |
| 5.01E-04  | NM_001130           | 1.26 <i>Arhgef1</i>   | Rho guanine nucleotide exchange factor (GEF) 1                                  | 0035023 // regulation of Rho protein signal transduction // inferred from electronic annotation///0038032    |
| 0.0042069 | NM_010415           | 1.27 <i>Hbegf</i>     | heparin-binding EGF-like growth factor                                          | 0001525 // angiogenesis // non-traceable author statement///0001832 // blastocyst growth // traceable a      |



| p (WT:KO) | RefSeq Tran: FD Air | Gene Symbol                                                                   | Gene Title                                                                     | Gene Ontology Biological Process                                                                            |
|-----------|---------------------|-------------------------------------------------------------------------------|--------------------------------------------------------------------------------|-------------------------------------------------------------------------------------------------------------|
| 0.0391272 | NM_008655           | <b>1.27</b> <i>Gadd45b</i>                                                    | growth arrest and DNA-damage-inducible 45 beta                                 | 0000185 // activation of MAPKK activity // not recorded//0000186 // activation of MAPKK activity // infe    |
| 0.0014458 | NM_025476           | <b>1.27</b> <i>Rmdn1</i>                                                      | regulator of microtubule dynamics 1                                            |                                                                                                             |
| 0.0033835 | NM_008055           | <b>1.27</b> <i>Fzd4</i>                                                       | frizzled homolog 4 (Drosophila)                                                | 0001553 // luteinization // inferred from mutant phenotype//0001568 // blood vessel development // inf      |
| 0.0177529 | NM_025436           | <b>1.27</b> <i>Msmo1</i>                                                      | methylsterol monooxygenase 1                                                   | 0006629 // lipid metabolic process // inferred from electronic annotation//0006633 // fatty acid biosynth   |
| 0.0255131 | NM_001111           | <b>1.28</b> <i>Zfp322a</i>                                                    | zinc finger protein 322A                                                       | 0006351 // transcription, DNA-templated // inferred from electronic annotation//0006355 // regulation o     |
| 0.0097232 | NM_013833           | <b>1.28</b> <i>Grip//Rax</i>                                                  | gastrin releasing peptide//retina and anterior neural fold homeobox            | 0006351 // transcription, DNA-templated // inferred from electronic annotation//0006355 // regulation o     |
| 0.0027466 | NM_001146           | <b>1.28</b> <i>Nkx2-1</i>                                                     | NK2 homeobox 1                                                                 | 0000122 // negative regulation of transcription from RNA polymerase II promoter // inferred from direct a   |
| 0.0160011 | NM_001290           | <b>1.28</b> <i>Cwc22//Xdh</i>                                                 | CWC22 spliceosome-associated protein homolog (S. cerevisiae)//xanthine de      | 0000398 // mRNA splicing, via spliceosome // not recorded//0001933 // negative regulation of protein ph     |
| 0.004408  | NM_001168           | <b>1.28</b> <i>Tmc3</i>                                                       | transmembrane and coiled coil domains 3                                        |                                                                                                             |
| 0.044719  | NM_001145           | <b>1.29</b> <i>Slc15a2</i>                                                    | solute carrier family 15 (H+/peptide transporter), member 2                    | 0006810 // transport // inferred from electronic annotation//0006857 // oligopeptide transport // inferre   |
| 0.0067158 | NM_011436           | <b>1.29</b> <i>Sor11</i>                                                      | sortilin-related receptor, LDLR class A repeats-containing                     | 0000042 // protein targeting to Golgi // not recorded//0006605 // protein targeting // not recorded//000    |
| 0.001724  | NM_001163           | <b>1.29</b> <i>Bri3</i>                                                       | brain protein I3                                                               |                                                                                                             |
| 2.21E-04  | NM_172505           | <b>1.29</b> <i>A730008H23Rik//Hjurp//6430706D22Rik</i>                        | RIKEN cDNA A730008H23 gene//Holliday junction recognition protein//RIKE        | 0007049 // cell cycle // inferred from electronic annotation//0007059 // chromosome segregation // not i    |
| 0.0089814 | NM_009135           | <b>1.29</b> <i>Scn7a</i>                                                      | sodium channel, voltage-gated, type VII, alpha                                 | 0006810 // transport // inferred from electronic annotation//0006811 // ion transport // inferred from el   |
| 0.0189613 | NM_019568           | <b>1.29</b> <i>Cxcl14</i>                                                     | chemokine (C-X-C motif) ligand 14                                              | 0006955 // immune response // inferred from electronic annotation//0045662 // negative regulation of r      |
| 0.0351907 | NM_009438           | <b>1.29</b> <i>Fhl3//Rpl13a</i>                                               | FMS-like tyrosine kinase 3 ligand//ribosomal protein L13A                      | 0001934 // positive regulation of protein phosphorylation // inferred from genetic interaction//0006412 //  |
| 0.0029986 | NM_026428           | <b>1.29</b> <i>Dcxr</i>                                                       | dicarbonyl L-xylulose reductase                                                | 0005975 // carbohydrate metabolic process // inferred from electronic annotation//0005997 // xylulose n     |
| 0.0049446 | NM_001146           | <b>1.29</b> <i>Pdgfrb</i>                                                     | platelet derived growth factor receptor, beta polypeptide                      | 0001568 // blood vessel development // inferred from expression pattern//0001701 // in utero embryoni       |
| 0.0110091 | NM_021395           | <b>1.29</b> <i>Hyou1</i>                                                      | hypoxia up-regulated 1                                                         | 0001666 // response to hypoxia // not recorded//0002931 // response to ischemia // inferred from direct     |
| 0.0010226 | NM_007419           | <b>1.30</b> <i>Adrb1</i>                                                      | adrenergic receptor, beta 1                                                    | 0001996 // positive regulation of heart rate by epinephrine-norepinephrine // inferred from mutant pheno    |
| 3.50E-04  | NM_023133           | <b>1.30</b> <i>Rps19//Rps19-ps1//Rps19-ps2//Rps19-ps3//Rps19-ps6//Rps19-p</i> | ribosomal protein S19//ribosomal protein S19, pseudogene 1//ribosomal pr       | 0000028 // ribosomal small subunit assembly // not recorded//0000462 // maturation of SSU-rRNA from i       |
| 9.47E-04  | NM_001036           | <b>1.30</b> <i>Atp2b2</i>                                                     | ATPase, Ca++ transporting, plasma membrane 2                                   | 0000902 // cell morphogenesis // inferred from mutant phenotype//0006810 // transport // inferred from      |
| 0.0222483 | NM_015800           | <b>1.30</b> <i>Crim1</i>                                                      | cysteine rich transmembrane BMP regulator 1 (chordin like)                     | 0001558 // regulation of cell growth // inferred from electronic annotation//0010951 // negative regulati   |
| 0.0013962 | NM_008898           | <b>1.30</b> <i>Por</i>                                                        | P450 (cytochrome) oxidoreductase                                               | 0003420 // regulation of growth plate cartilage chondrocyte proliferation // not recorded//0007584 // res   |
| 1.55E-04  | NM_172505           | <b>1.30</b> <i>6430706D22Rik//A730008H23Rik//Hjurp</i>                        | Holliday junction recognition protein                                          | 0007049 // cell cycle // inferred from electronic annotation//0007059 // chromosome segregation // not i    |
| 0.0020454 | NM_001109           | <b>1.31</b> <i>Kazn</i>                                                       | kazrin, periplakin interacting protein                                         | 0031424 // keratinization // inferred from electronic annotation                                            |
| 0.0054159 | NM_009196           | <b>1.31</b> <i>Slc16a1</i>                                                    | solute carrier family 16 (monocarboxylic acid transporters), member 1          | 0006629 // lipid metabolic process // inferred from mutant phenotype//0006810 // transport // inferred f    |
| 9.29E-04  | NM_001289           | <b>1.32</b> <i>Pira1//Pira2//Pira6//Gm10693//Gm14548//Lira6//Pira11//Pi</i>   | paired-ig-like receptor A1//paired-ig-like receptor A2//paired-ig-like recepto | 0001782 // B cell homeostasis // inferred from mutant phenotype//0002250 // adaptive immune respons         |
| 0.0156341 | NM_021349           | <b>1.32</b> <i>Tnfrsf13b</i>                                                  | tumor necrosis factor receptor superfamily, member 13b                         | 0001782 // B cell homeostasis // inferred from direct assay//0001782 // B cell homeostasis // inferre       |
| 0.0061959 | NM_001081           | <b>1.32</b> <i>Irs2</i>                                                       | insulin receptor substrate 2                                                   | 0002053 // positive regulation of mesenchymal cell proliferation // inferred from genetic interaction//000  |
| 0.0036453 | NM_009911           | <b>1.32</b> <i>Cxcr4</i>                                                      | chemokine (C-X-C motif) receptor 4                                             | 0001569 // patterning of blood vessels // inferred from mutant phenotype//0001666 // response to hypoxi     |
| 0.0237046 | NM_001035           | <b>1.32</b> <i>Akap2//Pakap</i>                                               | A kinase (PRKA) anchor protein 2//paralemmin A kinase anchor protein           | 0007015 // actin filament organization // inferred from direct assay//0007178 // transmembrane recepto      |
| 0.0390949 | NM_001290           | <b>1.33</b> <i>Ttc14</i>                                                      | tetratricopeptide repeat domain 14                                             | 0001947 // heart looping // ---//0003341 // cilium movement // ---//0003356 // regulation of cilium beat    |
| 0.0101252 | NM_001142           | <b>1.33</b> <i>Lmo2</i>                                                       | LIM domain only 2                                                              | 0035162 // embryonic hemopoiesis // inferred from genetic interaction//0042789 // mRNA transcription i      |
| 0.0025517 | NR_002847           | <b>1.34</b> <i>Malat1</i>                                                     | metastasis associated lung adenocarcinoma transcript 1 (non-coding RNA)        | 0000381 // regulation of alternative mRNA splicing, via spliceosome // inferred from mutant phenotype//     |
| 0.0015302 | NM_001113           | <b>1.34</b> <i>Ldb1</i>                                                       | LIM domain binding 1                                                           | 0000972 // transcription-dependent tethering of RNA polymerase II gene DNA at nuclear periphery // infer    |
| 0.0208486 | NM_001077           | <b>1.35</b> <i>Hnrnpd</i>                                                     | heterogeneous nuclear ribonucleoprotein D                                      | 0006351 // transcription, DNA-templated // inferred from electronic annotation//0006355 // regulation o     |
| 0.0067467 | NM_001164           | <b>1.35</b> <i>Ankrd33b</i>                                                   | ankyrin repeat domain 33B                                                      |                                                                                                             |
| 0.0090709 | NM_018820           | <b>1.35</b> <i>Sertad1</i>                                                    | SERTA domain containing 1                                                      | 0006351 // transcription, DNA-templated // inferred from electronic annotation//0006355 // regulation o     |
| 1.95E-04  | NM_027873           | <b>1.35</b> <i>Ubiad1</i>                                                     | UbiA prenyltransferase domain containing 1                                     | 0001885 // endothelial cell development // inferred from sequence or structural similarity//0006744 // ut   |
| 0.0055772 | NM_001111           | <b>1.36</b> <i>Cd59a</i>                                                      | CD59a antigen                                                                  | 0001775 // cell activation // ---//0001971 // negative regulation of activation of membrane attack comple   |
| 0.0028429 | NM_001177           | <b>1.36</b> <i>Pfkfb3</i>                                                     | 6-phosphofructo-2-kinase/fructose-2,6-biphosphatase 3                          | 0006000 // fructose metabolic process // inferred from electronic annotation//0006003 // fructose 2,6-bi    |
| 0.0195851 | NM_009052           | <b>1.36</b> <i>Bex1</i>                                                       | brain expressed gene 1                                                         | 0002052 // positive regulation of neuroblast proliferation // not recorded//0007275 // multicellular organ  |
| 6.30E-04  | NM_001289           | <b>1.37</b> <i>Sox17</i>                                                      | SRV (sex determining region Y)-box 17                                          | 0000122 // negative regulation of transcription from RNA polymerase II promoter // inferred from mutant     |
| 2.78E-04  | NM_021332           | <b>1.38</b> <i>Glip1r</i>                                                     | glucagon-like peptide 1 receptor                                               | 0006950 // response to stress // inferred from mutant phenotype//0007165 // signal transduction // infer    |
| 0.0017829 | NM_001163           | <b>1.39</b> <i>Emcn</i>                                                       | endomucin                                                                      | 0001525 // angiogenesis // inferred from sequence or structural similarity//0016337 // single organismal i  |
| 0.0020934 | NM_008360           | <b>1.39</b> <i>Il18</i>                                                       | interleukin 18                                                                 | 0000165 // MAPK cascade // not recorded//0001525 // angiogenesis // not recorded//0001525 // angiog         |
| 0.0069613 | NM_013672           | <b>1.39</b> <i>Sp1</i>                                                        | trans-acting transcription factor 1                                            | 0001503 // ossification // inferred from genetic interaction//0001701 // in utero embryonic development     |
| 1.71E-04  | NM_001083           | <b>1.40</b> <i>Gm13139</i>                                                    | predicted gene 13139                                                           | 0002244 // hematopoietic progenitor cell differentiation // inferred from mutant phenotype//0006355 //      |
| 1.03E-04  | NM_029357           | <b>1.40</b> <i>Pcdh1</i>                                                      | protocadherin 1                                                                | 0007155 // cell adhesion // inferred from electronic annotation//0007156 // homophilic cell adhesion via    |
| 0.0440882 | NM_007705           | <b>1.41</b> <i>Cirbp</i>                                                      | cold inducible RNA binding protein                                             | 0009409 // response to cold // inferred from electronic annotation//0009411 // response to UV // not rec    |
| 2.70E-04  | NM_001289           | <b>1.41</b> <i>Pira1//Pira2//Pira6//Gm10693//Gm14548//Lira6//Pira11//Pi</i>   | paired-ig-like receptor A1//paired-ig-like receptor A2//paired-ig-like recepto | 0001782 // B cell homeostasis // inferred from mutant phenotype//0002250 // adaptive immune respons         |
| 1.92E-04  | NM_001111           | <b>1.41</b> <i>Comt</i>                                                       | catechol-O-methyltransferase                                                   | 0006584 // catecholamine metabolic process // inferred from electronic annotation//0007565 // female p      |
| 1.31E-04  | NM_011057           | <b>1.42</b> <i>Pdgfb</i>                                                      | platelet derived growth factor, B polypeptide                                  | 0001568 // blood vessel development // inferred from expression pattern//0001666 // response to hypoxi      |
| 0.0452824 | NM_022983           | <b>1.45</b> <i>Lpar3</i>                                                      | lysophosphatidic acid receptor 3                                               | 0000187 // activation of MAPK activity // inferred from direct assay//0007165 // signal transduction // inf |
| 0.0026965 | NR_045032           | <b>1.45</b> <i>Gdap10</i>                                                     | ganglioside-induced differentiation-associated-protein 10                      |                                                                                                             |
| 2.59E-04  | NM_001003           | <b>1.47</b> <i>Pcdha1//Pcdha10//Pcdha11//Pcdha12//Pcdha2//Pcdha3//Pcdh</i>    | protocadherin alpha 1//protocadherin alpha 10//protocadherin alpha 11//        | 0007155 // cell adhesion // inferred from electronic annotation//0007155 // cell adhesion // traceable au   |
| 1.47E-04  | NM_001252           | <b>1.49</b> <i>Tspan4</i>                                                     | tetraspanin 4                                                                  | 0006461 // protein complex assembly // not recorded//0007166 // cell surface receptor signaling pathwa      |
| 4.55E-05  | NM_153068           | <b>1.51</b> <i>Ehd2</i>                                                       | EH-domain containing 2                                                         | 0006897 // endocytosis // inferred from direct assay//0008152 // metabolic process // inferred from elect   |
| 1.07E-05  | NM_009003           | <b>1.53</b> <i>Rab4a</i>                                                      | RAB4A, member RAS oncogene family                                              | 0006810 // transport // inferred from electronic annotation//0006886 // intracellular protein transport //  |
| 0.0335806 | NM_001166           | <b>1.54</b> <i>Gm15453//Rbm3</i>                                              | predicted gene 15453//RNA binding motif protein 3                              | 0006412 // translation // inferred from direct assay//0006417 // regulation of translation // inferred from |
| 0.0038689 | NM_139149           | <b>1.55</b> <i>Fus</i>                                                        | fused in sarcoma                                                               | 0071277 // cellular response to calcium ion // not recorded//1903506 // regulation of nucleic acid-templa   |
| 2.21E-04  | NM_017376           | <b>1.55</b> <i>Tef</i>                                                        | thyrotroph embryonic factor                                                    | 0006351 // transcription, DNA-templated // inferred from electronic annotation//0006355 // regulation o     |
| 0.0062066 | NR_002840/          | <b>1.56</b> <i>Gass5//Snord47</i>                                             | growth arrest specific 5//small nucleolar RNA, C/D box 47                      |                                                                                                             |
| 1.76E-05  | NM_001160           | <b>1.57</b> <i>Gnb1</i>                                                       | guanine nucleotide binding protein (G protein), beta 1                         | 0007165 // signal transduction // inferred from electronic annotation//0007186 // G-protein coupled rece    |
| 1.70E-06  | NM_001111           | <b>1.60</b> <i>Wdfy1</i>                                                      | WD repeat and FYVE domain containing 1                                         | 0034141 // positive regulation of toll-like receptor 3 signaling pathway // inferred from mutant phenotype  |

| p (WT:KO) | RefSeq Tran: FD Air | Gene Symbol                                                               | Gene Title                                                                 | Gene Ontology Biological Process                                                                           |
|-----------|---------------------|---------------------------------------------------------------------------|----------------------------------------------------------------------------|------------------------------------------------------------------------------------------------------------|
| 3.15E-04  | NM_001165           | 1.60 <i>Tshb</i>                                                          | thyroid stimulating hormone, beta subunit                                  | 0033189 // response to vitamin A // inferred from electronic annotation///0043627 // response to estrog    |
| 7.45E-04  | NM_145434           | 1.64 <i>Nr1d1</i>                                                         | nuclear receptor subfamily 1, group D, member 1                            | 0000122 // negative regulation of transcription from RNA polymerase II promoter // not recorded///00059    |
| 3.92E-04  | NM_011122           | 1.65 <i>Plod1</i>                                                         | procollagen-lysine, 2-oxoglutarate 5-dioxygenase 1                         | 0001666 // response to hypoxia // inferred from electronic annotation///0008544 // epidermis developme     |
| 0.0171234 |                     | 1.67 <i>Ighd</i>                                                          | immunoglobulin heavy constant delta                                        | 0016064 // immunoglobulin mediated immune response // inferred from mutant phenotype///0016446 //          |
| 3.30E-04  | NM_001003           | 1.68 <i>Pcdha1///Pcdha10///Pcdha11///Pcdha12///Pcdha2///Pcdha3///Pcdh</i> | protocadherin alpha 1///protocadherin alpha 10///protocadherin alpha 11/// | 0007155 // cell adhesion // inferred from electronic annotation///0007155 // cell adhesion // traceable au |
| 0.0221363 | NM_011584           | 1.79 <i>Nr1d2</i>                                                         | nuclear receptor subfamily 1, group D, member 2                            | 0006351 // transcription, DNA-templated // inferred from electronic annotation///0006355 // regulation o   |
| 1.05E-04  | XM_011238!          | 1.88 <i>Gm3579///Gm40514///Gm40814///Gm40991///Gm42035///Gm4210</i>       | predicted gene 3579///predicted gene, 40514///predicted gene, 40814///pre  | 0015074 // DNA integration // inferred from electronic annotation///0090502 // RNA phosphodiester bonc     |
| 2.41E-05  | NM_001308           | 1.92 <i>Nnt</i>                                                           | nicotinamide nucleotide transhydrogenase                                   | 0006740 // NADPH regeneration // not recorded///0015992 // proton transport // not recorded///004545-      |
| 1.37E-07  | NM_177673           | 1.92 <i>Cep104</i>                                                        | centrosomal protein 104                                                    |                                                                                                            |
| 4.55E-05  | XM_011238!          | 2.30 <i>Gm3579///Gm40514///Gm40814///Gm40991///Gm42035///Gm4210</i>       | predicted gene 3579///predicted gene, 40514///predicted gene, 40814///pre  | 0015074 // DNA integration // inferred from electronic annotation///0090502 // RNA phosphodiester bonc     |
| 1.15E-06  | XM_011238!          | 2.54 <i>Gm37416///Gm39743///Gm40611///Gm40814///Gm41035///Gm414</i>       | predicted gene, 37416///predicted gene, 39743///predicted gene, 40611///pr | 0006278 // RNA-dependent DNA replication // inferred from electronic annotation///0008152 // metabol       |
| 4.98E-06  | NM_016974           | 3.66 <i>Dbp</i>                                                           | D site albumin promoter binding protein                                    | 0001889 // liver development // inferred from electronic annotation///0006351 // transcription, DNA-tem    |

**Table S4. Tumor necrosis factor receptor (TNFR)-dependently changed lung genes by 0.3-parts per million (ppm) ozone (O<sub>3</sub>).**

Affymatrix\_GeneChip\_MOE430A. 2 Way ANOVA (p<0.05). Order by fold difference (FD) at 48 hr O<sub>3</sub>.

Selected genes varied at least one time point between C57BL/6J and Tnfr-KO mice (positive-higher in KO, negative-lower in KO).

| RefSeq       | Tri   | p 24h | p 48h | p 72h  | FD Air | FD 24h | FD 48h | FD 72h | Gene Symbol                                                                                                                                                                                                                                                                                                                                                                                                                                                                                                                                                                                                                                                                                                                                                                                                                                                                                                                                                                                                                                                                                                                                                                                                                                                                                                                                                                                                                                                                                                                                                                                                                                                                                                                                                                                                                                                                                                                                                                                                                                                                                                                                                                                                                                                                                                                                                                                                                                                                                                                                                                                                                                                                                                                                                                                                                                                                                                                                                                                                                                                                                                                                                                                                                                                                                                                                                                                                                                                                                                                                                                                                                                                                                                                                                                                                                                                                                                                                                                                                                                                                                                                                                                                                                                                                                                                                                                                                                                                                                                                                                                                                                                                                                                                                                                                                                                                                                                                                                                                                                                                                                                                                                                                                                                                                                                                                                                                                                                                                                                                                                                                                                                                                                                                                                                                                                                                                                                                                                                                                                                                                                                                                                                                                                                                                                                                                                                                                                                                                                                                                                                                                                                                                                                                                                                                                                                                                                                                                                                                                                                                                                                                                                                                                                                                                                                                                                                                                                                                                                                                                                                                                                                                                                                                                                                                                                                                                                                                                                                                                                                                                                                                                                                                                                                                                                                                                                                                                                                                                                                                                                                                                                                                                                                                                                                                                                                                                                                                                                                                                                                                                                                                                                                                                                                                                                                                                                                                                                                                                                                                                                                                                                                                                                                                                                                                                                                                                                                                                                                                                                                                                                                                                                                                                                                                                                                                                                                                                                                                                                                                                                                                                                                                                                                                                                                                                                                                                                                                                                                                                                                                                                                                                                                                                                                                                                                                                                                                                                                                                                                                                                                                                                                                                                                                                                                                                                                                                                                                                                                                                                                                                                                                                                                                                                                                                                                                                                                                                                                                                                                                                                                                                                                                                                                                                                                                                                                                                                                                                                                                                                                                                                                                                                                                                                                                                                                                                                                                                                                                                                                                                                                                                                                                                                                                                                                                                                                                                                                                                                                                                                                                                                                                                                                                                                                                                                                                                                                                                                                                                                                                                                                                                                                                                                                                                                                                                                                                                                                                                                                                                                                                                                                                                                                                                                                                                                                                                                                                                                                                                                                                                                                                                                                                                                                                                                                                                                                                                                                                                                                                                                                                                                                                                                                                                                                                                                                                                                                                                                                                                                                                                                                                                                                                                                                                                                                                                                                                                                                                                                                                                                                                                                                                                                                                                                                                                                                                                                                                                                                                                                                                                                                                                                                                                                                                                                                                                                                                                                                                                                                                                                                                                                                                                                                                                                                                                                                                                                                                                                                                                                                                                                                                                                                                                                                                                                                                                                                                                                                                                                                                                                                                                                                                                                                                                                                                                                                                                                                                                                                                                                                                                                                                                                                                                                                                                     | Gene Title                          | Gene Ontology Biological Process                                                         |
|--------------|-------|-------|-------|--------|--------|--------|--------|--------|-------------------------------------------------------------------------------------------------------------------------------------------------------------------------------------------------------------------------------------------------------------------------------------------------------------------------------------------------------------------------------------------------------------------------------------------------------------------------------------------------------------------------------------------------------------------------------------------------------------------------------------------------------------------------------------------------------------------------------------------------------------------------------------------------------------------------------------------------------------------------------------------------------------------------------------------------------------------------------------------------------------------------------------------------------------------------------------------------------------------------------------------------------------------------------------------------------------------------------------------------------------------------------------------------------------------------------------------------------------------------------------------------------------------------------------------------------------------------------------------------------------------------------------------------------------------------------------------------------------------------------------------------------------------------------------------------------------------------------------------------------------------------------------------------------------------------------------------------------------------------------------------------------------------------------------------------------------------------------------------------------------------------------------------------------------------------------------------------------------------------------------------------------------------------------------------------------------------------------------------------------------------------------------------------------------------------------------------------------------------------------------------------------------------------------------------------------------------------------------------------------------------------------------------------------------------------------------------------------------------------------------------------------------------------------------------------------------------------------------------------------------------------------------------------------------------------------------------------------------------------------------------------------------------------------------------------------------------------------------------------------------------------------------------------------------------------------------------------------------------------------------------------------------------------------------------------------------------------------------------------------------------------------------------------------------------------------------------------------------------------------------------------------------------------------------------------------------------------------------------------------------------------------------------------------------------------------------------------------------------------------------------------------------------------------------------------------------------------------------------------------------------------------------------------------------------------------------------------------------------------------------------------------------------------------------------------------------------------------------------------------------------------------------------------------------------------------------------------------------------------------------------------------------------------------------------------------------------------------------------------------------------------------------------------------------------------------------------------------------------------------------------------------------------------------------------------------------------------------------------------------------------------------------------------------------------------------------------------------------------------------------------------------------------------------------------------------------------------------------------------------------------------------------------------------------------------------------------------------------------------------------------------------------------------------------------------------------------------------------------------------------------------------------------------------------------------------------------------------------------------------------------------------------------------------------------------------------------------------------------------------------------------------------------------------------------------------------------------------------------------------------------------------------------------------------------------------------------------------------------------------------------------------------------------------------------------------------------------------------------------------------------------------------------------------------------------------------------------------------------------------------------------------------------------------------------------------------------------------------------------------------------------------------------------------------------------------------------------------------------------------------------------------------------------------------------------------------------------------------------------------------------------------------------------------------------------------------------------------------------------------------------------------------------------------------------------------------------------------------------------------------------------------------------------------------------------------------------------------------------------------------------------------------------------------------------------------------------------------------------------------------------------------------------------------------------------------------------------------------------------------------------------------------------------------------------------------------------------------------------------------------------------------------------------------------------------------------------------------------------------------------------------------------------------------------------------------------------------------------------------------------------------------------------------------------------------------------------------------------------------------------------------------------------------------------------------------------------------------------------------------------------------------------------------------------------------------------------------------------------------------------------------------------------------------------------------------------------------------------------------------------------------------------------------------------------------------------------------------------------------------------------------------------------------------------------------------------------------------------------------------------------------------------------------------------------------------------------------------------------------------------------------------------------------------------------------------------------------------------------------------------------------------------------------------------------------------------------------------------------------------------------------------------------------------------------------------------------------------------------------------------------------------------------------------------------------------------------------------------------------------------------------------------------------------------------------------------------------------------------------------------------------------------------------------------------------------------------------------------------------------------------------------------------------------------------------------------------------------------------------------------------------------------------------------------------------------------------------------------------------------------------------------------------------------------------------------------------------------------------------------------------------------------------------------------------------------------------------------------------------------------------------------------------------------------------------------------------------------------------------------------------------------------------------------------------------------------------------------------------------------------------------------------------------------------------------------------------------------------------------------------------------------------------------------------------------------------------------------------------------------------------------------------------------------------------------------------------------------------------------------------------------------------------------------------------------------------------------------------------------------------------------------------------------------------------------------------------------------------------------------------------------------------------------------------------------------------------------------------------------------------------------------------------------------------------------------------------------------------------------------------------------------------------------------------------------------------------------------------------------------------------------------------------------------------------------------------------------------------------------------------------------------------------------------------------------------------------------------------------------------------------------------------------------------------------------------------------------------------------------------------------------------------------------------------------------------------------------------------------------------------------------------------------------------------------------------------------------------------------------------------------------------------------------------------------------------------------------------------------------------------------------------------------------------------------------------------------------------------------------------------------------------------------------------------------------------------------------------------------------------------------------------------------------------------------------------------------------------------------------------------------------------------------------------------------------------------------------------------------------------------------------------------------------------------------------------------------------------------------------------------------------------------------------------------------------------------------------------------------------------------------------------------------------------------------------------------------------------------------------------------------------------------------------------------------------------------------------------------------------------------------------------------------------------------------------------------------------------------------------------------------------------------------------------------------------------------------------------------------------------------------------------------------------------------------------------------------------------------------------------------------------------------------------------------------------------------------------------------------------------------------------------------------------------------------------------------------------------------------------------------------------------------------------------------------------------------------------------------------------------------------------------------------------------------------------------------------------------------------------------------------------------------------------------------------------------------------------------------------------------------------------------------------------------------------------------------------------------------------------------------------------------------------------------------------------------------------------------------------------------------------------------------------------------------------------------------------------------------------------------------------------------------------------------------------------------------------------------------------------------------------------------------------------------------------------------------------------------------------------------------------------------------------------------------------------------------------------------------------------------------------------------------------------------------------------------------------------------------------------------------------------------------------------------------------------------------------------------------------------------------------------------------------------------------------------------------------------------------------------------------------------------------------------------------------------------------------------------------------------------------------------------------------------------------------------------------------------------------------------------------------------------------------------------------------------------------------------------------------------------------------------------------------------------------------------------------------------------------------------------------------------------------------------------------------------------------------------------------------------------------------------------------------------------------------------------------------------------------------------------------------------------------------------------------------------------------------------------------------------------------------------------------------------------------------------------------------------------------------------------------------------------------------------------------------------------------------------------------------------------------------------------------------------------------------------------------------------------------------------------------------------------------------------------------------------------------------------------------------------------------------------------------------------------------------------------------------------------------------------------------------------------------------------------------------------------------------------------------------------------------------------------------------------------------------------------------------------------------------------------------------------------------------------------------------------------------------------------------------------------------------------------------------------------------------------------------------------------------------------------------------------------------------------------------------------------------------------------------------------------------------------------------------------------------------------------------------------------------------------------------------------------------------------------------------------------------------------------------------------------------------------------------------------------------------------------------------------------------------------------------------------------------------------------------------------------------------------------------------------------------------------------------------------------------------------------------------------------------------------------------------------------------------------------------------------------------------------------------------------------------------------------------------------------------------------------------------------------------------------------------------------------------------------------------------------------------------------------------------------------------------------------------------------------------------------------------------------------------------------------------------------------------------------------------------------------------------------------------------------------------------------------------------------------------------------------------------------------------------------------------------------------------------------------------------------------------------------------------------------------------------------------------------------------------------------------------------------------------------------------------------------------------------------------------------------------------------------------------------------------------------------------------------------------------------------------------------------------------------------------------------------------------------------------------------------------------------------------------------------------------------------------------------------------------------------------------------------------------------------------------------------------------------------------------------------------------------------------------------------------------------------------------------------------------------------------------------------------------------------------------------------------------------------------------------------------------------------------------------------------------------------------------------------------------------------------------------------------------------------------------------------------------------------------------------------------------------------------------------------------------------------------------------------------------------------------------------------------------------------------------------------------------------------------------------------------------------------------------------------------------------------------------------------------------------------------------------------------------------------------------------------------------------------------------------------------------------------------------------------|-------------------------------------|------------------------------------------------------------------------------------------|
| NM_173781    | ///XM | 0.027 |       |        | -3.10  | -3.96  | -4.12  | -2.90  | <b>Rab6b</b>                                                                                                                                                                                                                                                                                                                                                                                                                                                                                                                                                                                                                                                                                                                                                                                                                                                                                                                                                                                                                                                                                                                                                                                                                                                                                                                                                                                                                                                                                                                                                                                                                                                                                                                                                                                                                                                                                                                                                                                                                                                                                                                                                                                                                                                                                                                                                                                                                                                                                                                                                                                                                                                                                                                                                                                                                                                                                                                                                                                                                                                                                                                                                                                                                                                                                                                                                                                                                                                                                                                                                                                                                                                                                                                                                                                                                                                                                                                                                                                                                                                                                                                                                                                                                                                                                                                                                                                                                                                                                                                                                                                                                                                                                                                                                                                                                                                                                                                                                                                                                                                                                                                                                                                                                                                                                                                                                                                                                                                                                                                                                                                                                                                                                                                                                                                                                                                                                                                                                                                                                                                                                                                                                                                                                                                                                                                                                                                                                                                                                                                                                                                                                                                                                                                                                                                                                                                                                                                                                                                                                                                                                                                                                                                                                                                                                                                                                                                                                                                                                                                                                                                                                                                                                                                                                                                                                                                                                                                                                                                                                                                                                                                                                                                                                                                                                                                                                                                                                                                                                                                                                                                                                                                                                                                                                                                                                                                                                                                                                                                                                                                                                                                                                                                                                                                                                                                                                                                                                                                                                                                                                                                                                                                                                                                                                                                                                                                                                                                                                                                                                                                                                                                                                                                                                                                                                                                                                                                                                                                                                                                                                                                                                                                                                                                                                                                                                                                                                                                                                                                                                                                                                                                                                                                                                                                                                                                                                                                                                                                                                                                                                                                                                                                                                                                                                                                                                                                                                                                                                                                                                                                                                                                                                                                                                                                                                                                                                                                                                                                                                                                                                                                                                                                                                                                                                                                                                                                                                                                                                                                                                                                                                                                                                                                                                                                                                                                                                                                                                                                                                                                                                                                                                                                                                                                                                                                                                                                                                                                                                                                                                                                                                                                                                                                                                                                                                                                                                                                                                                                                                                                                                                                                                                                                                                                                                                                                                                                                                                                                                                                                                                                                                                                                                                                                                                                                                                                                                                                                                                                                                                                                                                                                                                                                                                                                                                                                                                                                                                                                                                                                                                                                                                                                                                                                                                                                                                                                                                                                                                                                                                                                                                                                                                                                                                                                                                                                                                                                                                                                                                                                                                                                                                                                                                                                                                                                                                                                                                                                                                                                                                                                                                                                                                                                                                                                                                                                                                                                                                                                                                                                                                                                                                                                                                                                                                                                                                                                                                                                                                                                                                                                                                                                                                                                                                                                                                                                                                                                                                                                                                                                                                                                                                                                                                                                                                                                                                                                                                                                                                                                                                                                                                                                                                                                                                                                    | RAB6B, member RAS oncogene family   | 0006810 // transport // inferred from electronic annotation//0006886 // intracellular pr |
| NM_001131054 | ///   | 0.014 | 2E-04 | -4.27  | -4.12  | -3.09  | -1.84  |        | <b>Pttg1</b>                                                                                                                                                                                                                                                                                                                                                                                                                                                                                                                                                                                                                                                                                                                                                                                                                                                                                                                                                                                                                                                                                                                                                                                                                                                                                                                                                                                                                                                                                                                                                                                                                                                                                                                                                                                                                                                                                                                                                                                                                                                                                                                                                                                                                                                                                                                                                                                                                                                                                                                                                                                                                                                                                                                                                                                                                                                                                                                                                                                                                                                                                                                                                                                                                                                                                                                                                                                                                                                                                                                                                                                                                                                                                                                                                                                                                                                                                                                                                                                                                                                                                                                                                                                                                                                                                                                                                                                                                                                                                                                                                                                                                                                                                                                                                                                                                                                                                                                                                                                                                                                                                                                                                                                                                                                                                                                                                                                                                                                                                                                                                                                                                                                                                                                                                                                                                                                                                                                                                                                                                                                                                                                                                                                                                                                                                                                                                                                                                                                                                                                                                                                                                                                                                                                                                                                                                                                                                                                                                                                                                                                                                                                                                                                                                                                                                                                                                                                                                                                                                                                                                                                                                                                                                                                                                                                                                                                                                                                                                                                                                                                                                                                                                                                                                                                                                                                                                                                                                                                                                                                                                                                                                                                                                                                                                                                                                                                                                                                                                                                                                                                                                                                                                                                                                                                                                                                                                                                                                                                                                                                                                                                                                                                                                                                                                                                                                                                                                                                                                                                                                                                                                                                                                                                                                                                                                                                                                                                                                                                                                                                                                                                                                                                                                                                                                                                                                                                                                                                                                                                                                                                                                                                                                                                                                                                                                                                                                                                                                                                                                                                                                                                                                                                                                                                                                                                                                                                                                                                                                                                                                                                                                                                                                                                                                                                                                                                                                                                                                                                                                                                                                                                                                                                                                                                                                                                                                                                                                                                                                                                                                                                                                                                                                                                                                                                                                                                                                                                                                                                                                                                                                                                                                                                                                                                                                                                                                                                                                                                                                                                                                                                                                                                                                                                                                                                                                                                                                                                                                                                                                                                                                                                                                                                                                                                                                                                                                                                                                                                                                                                                                                                                                                                                                                                                                                                                                                                                                                                                                                                                                                                                                                                                                                                                                                                                                                                                                                                                                                                                                                                                                                                                                                                                                                                                                                                                                                                                                                                                                                                                                                                                                                                                                                                                                                                                                                                                                                                                                                                                                                                                                                                                                                                                                                                                                                                                                                                                                                                                                                                                                                                                                                                                                                                                                                                                                                                                                                                                                                                                                                                                                                                                                                                                                                                                                                                                                                                                                                                                                                                                                                                                                                                                                                                                                                                                                                                                                                                                                                                                                                                                                                                                                                                                                                                                                                                                                                                                                                                                                                                                                                                                                                                                                                                                                                                                    | pituitary tumor-transforming gene 1 | 0001558 // regulation of cell growth // not recorded//0006281 // DNA repair // inferred  |
| NM_001045550 | ///   | 0.046 | 0.019 | -18.72 | -4.81  | -2.82  | 1.33   |        | <b>Mup1</b> /// <b>Mup10</b> /// <b>Mup12</b> /// <b>Mup13</b> /// <b>Mup14</b> /// <b>Mup15</b> /// <b>Mup16</b> /// <b>Mup17</b> /// <b>Mup18</b> /// <b>Mup19</b> /// <b>Mup20</b> /// <b>Mup21</b> /// <b>Mup22</b> /// <b>Mup23</b> /// <b>Mup24</b> /// <b>Mup25</b> /// <b>Mup26</b> /// <b>Mup27</b> /// <b>Mup28</b> /// <b>Mup29</b> /// <b>Mup30</b> /// <b>Mup31</b> /// <b>Mup32</b> /// <b>Mup33</b> /// <b>Mup34</b> /// <b>Mup35</b> /// <b>Mup36</b> /// <b>Mup37</b> /// <b>Mup38</b> /// <b>Mup39</b> /// <b>Mup40</b> /// <b>Mup41</b> /// <b>Mup42</b> /// <b>Mup43</b> /// <b>Mup44</b> /// <b>Mup45</b> /// <b>Mup46</b> /// <b>Mup47</b> /// <b>Mup48</b> /// <b>Mup49</b> /// <b>Mup50</b> /// <b>Mup51</b> /// <b>Mup52</b> /// <b>Mup53</b> /// <b>Mup54</b> /// <b>Mup55</b> /// <b>Mup56</b> /// <b>Mup57</b> /// <b>Mup58</b> /// <b>Mup59</b> /// <b>Mup60</b> /// <b>Mup61</b> /// <b>Mup62</b> /// <b>Mup63</b> /// <b>Mup64</b> /// <b>Mup65</b> /// <b>Mup66</b> /// <b>Mup67</b> /// <b>Mup68</b> /// <b>Mup69</b> /// <b>Mup70</b> /// <b>Mup71</b> /// <b>Mup72</b> /// <b>Mup73</b> /// <b>Mup74</b> /// <b>Mup75</b> /// <b>Mup76</b> /// <b>Mup77</b> /// <b>Mup78</b> /// <b>Mup79</b> /// <b>Mup80</b> /// <b>Mup81</b> /// <b>Mup82</b> /// <b>Mup83</b> /// <b>Mup84</b> /// <b>Mup85</b> /// <b>Mup86</b> /// <b>Mup87</b> /// <b>Mup88</b> /// <b>Mup89</b> /// <b>Mup90</b> /// <b>Mup91</b> /// <b>Mup92</b> /// <b>Mup93</b> /// <b>Mup94</b> /// <b>Mup95</b> /// <b>Mup96</b> /// <b>Mup97</b> /// <b>Mup98</b> /// <b>Mup99</b> /// <b>Mup100</b> /// <b>Mup101</b> /// <b>Mup102</b> /// <b>Mup103</b> /// <b>Mup104</b> /// <b>Mup105</b> /// <b>Mup106</b> /// <b>Mup107</b> /// <b>Mup108</b> /// <b>Mup109</b> /// <b>Mup110</b> /// <b>Mup111</b> /// <b>Mup112</b> /// <b>Mup113</b> /// <b>Mup114</b> /// <b>Mup115</b> /// <b>Mup116</b> /// <b>Mup117</b> /// <b>Mup118</b> /// <b>Mup119</b> /// <b>Mup120</b> /// <b>Mup121</b> /// <b>Mup122</b> /// <b>Mup123</b> /// <b>Mup124</b> /// <b>Mup125</b> /// <b>Mup126</b> /// <b>Mup127</b> /// <b>Mup128</b> /// <b>Mup129</b> /// <b>Mup130</b> /// <b>Mup131</b> /// <b>Mup132</b> /// <b>Mup133</b> /// <b>Mup134</b> /// <b>Mup135</b> /// <b>Mup136</b> /// <b>Mup137</b> /// <b>Mup138</b> /// <b>Mup139</b> /// <b>Mup140</b> /// <b>Mup141</b> /// <b>Mup142</b> /// <b>Mup143</b> /// <b>Mup144</b> /// <b>Mup145</b> /// <b>Mup146</b> /// <b>Mup147</b> /// <b>Mup148</b> /// <b>Mup149</b> /// <b>Mup150</b> /// <b>Mup151</b> /// <b>Mup152</b> /// <b>Mup153</b> /// <b>Mup154</b> /// <b>Mup155</b> /// <b>Mup156</b> /// <b>Mup157</b> /// <b>Mup158</b> /// <b>Mup159</b> /// <b>Mup160</b> /// <b>Mup161</b> /// <b>Mup162</b> /// <b>Mup163</b> /// <b>Mup164</b> /// <b>Mup165</b> /// <b>Mup166</b> /// <b>Mup167</b> /// <b>Mup168</b> /// <b>Mup169</b> /// <b>Mup170</b> /// <b>Mup171</b> /// <b>Mup172</b> /// <b>Mup173</b> /// <b>Mup174</b> /// <b>Mup175</b> /// <b>Mup176</b> /// <b>Mup177</b> /// <b>Mup178</b> /// <b>Mup179</b> /// <b>Mup180</b> /// <b>Mup181</b> /// <b>Mup182</b> /// <b>Mup183</b> /// <b>Mup184</b> /// <b>Mup185</b> /// <b>Mup186</b> /// <b>Mup187</b> /// <b>Mup188</b> /// <b>Mup189</b> /// <b>Mup190</b> /// <b>Mup191</b> /// <b>Mup192</b> /// <b>Mup193</b> /// <b>Mup194</b> /// <b>Mup195</b> /// <b>Mup196</b> /// <b>Mup197</b> /// <b>Mup198</b> /// <b>Mup199</b> /// <b>Mup200</b> /// <b>Mup201</b> /// <b>Mup202</b> /// <b>Mup203</b> /// <b>Mup204</b> /// <b>Mup205</b> /// <b>Mup206</b> /// <b>Mup207</b> /// <b>Mup208</b> /// <b>Mup209</b> /// <b>Mup210</b> /// <b>Mup211</b> /// <b>Mup212</b> /// <b>Mup213</b> /// <b>Mup214</b> /// <b>Mup215</b> /// <b>Mup216</b> /// <b>Mup217</b> /// <b>Mup218</b> /// <b>Mup219</b> /// <b>Mup220</b> /// <b>Mup221</b> /// <b>Mup222</b> /// <b>Mup223</b> /// <b>Mup224</b> /// <b>Mup225</b> /// <b>Mup226</b> /// <b>Mup227</b> /// <b>Mup228</b> /// <b>Mup229</b> /// <b>Mup230</b> /// <b>Mup231</b> /// <b>Mup232</b> /// <b>Mup233</b> /// <b>Mup234</b> /// <b>Mup235</b> /// <b>Mup236</b> /// <b>Mup237</b> /// <b>Mup238</b> /// <b>Mup239</b> /// <b>Mup240</b> /// <b>Mup241</b> /// <b>Mup242</b> /// <b>Mup243</b> /// <b>Mup244</b> /// <b>Mup245</b> /// <b>Mup246</b> /// <b>Mup247</b> /// <b>Mup248</b> /// <b>Mup249</b> /// <b>Mup250</b> /// <b>Mup251</b> /// <b>Mup252</b> /// <b>Mup253</b> /// <b>Mup254</b> /// <b>Mup255</b> /// <b>Mup256</b> /// <b>Mup257</b> /// <b>Mup258</b> /// <b>Mup259</b> /// <b>Mup260</b> /// <b>Mup261</b> /// <b>Mup262</b> /// <b>Mup263</b> /// <b>Mup264</b> /// <b>Mup265</b> /// <b>Mup266</b> /// <b>Mup267</b> /// <b>Mup268</b> /// <b>Mup269</b> /// <b>Mup270</b> /// <b>Mup271</b> /// <b>Mup272</b> /// <b>Mup273</b> /// <b>Mup274</b> /// <b>Mup275</b> /// <b>Mup276</b> /// <b>Mup277</b> /// <b>Mup278</b> /// <b>Mup279</b> /// <b>Mup280</b> /// <b>Mup281</b> /// <b>Mup282</b> /// <b>Mup283</b> /// <b>Mup284</b> /// <b>Mup285</b> /// <b>Mup286</b> /// <b>Mup287</b> /// <b>Mup288</b> /// <b>Mup289</b> /// <b>Mup290</b> /// <b>Mup291</b> /// <b>Mup292</b> /// <b>Mup293</b> /// <b>Mup294</b> /// <b>Mup295</b> /// <b>Mup296</b> /// <b>Mup297</b> /// <b>Mup298</b> /// <b>Mup299</b> /// <b>Mup300</b> /// <b>Mup301</b> /// <b>Mup302</b> /// <b>Mup303</b> /// <b>Mup304</b> /// <b>Mup305</b> /// <b>Mup306</b> /// <b>Mup307</b> /// <b>Mup308</b> /// <b>Mup309</b> /// <b>Mup310</b> /// <b>Mup311</b> /// <b>Mup312</b> /// <b>Mup313</b> /// <b>Mup314</b> /// <b>Mup315</b> /// <b>Mup316</b> /// <b>Mup317</b> /// <b>Mup318</b> /// <b>Mup319</b> /// <b>Mup320</b> /// <b>Mup321</b> /// <b>Mup322</b> /// <b>Mup323</b> /// <b>Mup324</b> /// <b>Mup325</b> /// <b>Mup326</b> /// <b>Mup327</b> /// <b>Mup328</b> /// <b>Mup329</b> /// <b>Mup330</b> /// <b>Mup331</b> /// <b>Mup332</b> /// <b>Mup333</b> /// <b>Mup334</b> /// <b>Mup335</b> /// <b>Mup336</b> /// <b>Mup337</b> /// <b>Mup338</b> /// <b>Mup339</b> /// <b>Mup340</b> /// <b>Mup341</b> /// <b>Mup342</b> /// <b>Mup343</b> /// <b>Mup344</b> /// <b>Mup345</b> /// <b>Mup346</b> /// <b>Mup347</b> /// <b>Mup348</b> /// <b>Mup349</b> /// <b>Mup350</b> /// <b>Mup351</b> /// <b>Mup352</b> /// <b>Mup353</b> /// <b>Mup354</b> /// <b>Mup355</b> /// <b>Mup356</b> /// <b>Mup357</b> /// <b>Mup358</b> /// <b>Mup359</b> /// <b>Mup360</b> /// <b>Mup361</b> /// <b>Mup362</b> /// <b>Mup363</b> /// <b>Mup364</b> /// <b>Mup365</b> /// <b>Mup366</b> /// <b>Mup367</b> /// <b>Mup368</b> /// <b>Mup369</b> /// <b>Mup370</b> /// <b>Mup371</b> /// <b>Mup372</b> /// <b>Mup373</b> /// <b>Mup374</b> /// <b>Mup375</b> /// <b>Mup376</b> /// <b>Mup377</b> /// <b>Mup378</b> /// <b>Mup379</b> /// <b>Mup380</b> /// <b>Mup381</b> /// <b>Mup382</b> /// <b>Mup383</b> /// <b>Mup384</b> /// <b>Mup385</b> /// <b>Mup386</b> /// <b>Mup387</b> /// <b>Mup388</b> /// <b>Mup389</b> /// <b>Mup390</b> /// <b>Mup391</b> /// <b>Mup392</b> /// <b>Mup393</b> /// <b>Mup394</b> /// <b>Mup395</b> /// <b>Mup396</b> /// <b>Mup397</b> /// <b>Mup398</b> /// <b>Mup399</b> /// <b>Mup400</b> /// <b>Mup401</b> /// <b>Mup402</b> /// <b>Mup403</b> /// <b>Mup404</b> /// <b>Mup405</b> /// <b>Mup406</b> /// <b>Mup407</b> /// <b>Mup408</b> /// <b>Mup409</b> /// <b>Mup410</b> /// <b>Mup411</b> /// <b>Mup412</b> /// <b>Mup413</b> /// <b>Mup414</b> /// <b>Mup415</b> /// <b>Mup416</b> /// <b>Mup417</b> /// <b>Mup418</b> /// <b>Mup419</b> /// <b>Mup420</b> /// <b>Mup421</b> /// <b>Mup422</b> /// <b>Mup423</b> /// <b>Mup424</b> /// <b>Mup425</b> /// <b>Mup426</b> /// <b>Mup427</b> /// <b>Mup428</b> /// <b>Mup429</b> /// <b>Mup430</b> /// <b>Mup431</b> /// <b>Mup432</b> /// <b>Mup433</b> /// <b>Mup434</b> /// <b>Mup435</b> /// <b>Mup436</b> /// <b>Mup437</b> /// <b>Mup438</b> /// <b>Mup439</b> /// <b>Mup440</b> /// <b>Mup441</b> /// <b>Mup442</b> /// <b>Mup443</b> /// <b>Mup444</b> /// <b>Mup445</b> /// <b>Mup446</b> /// <b>Mup447</b> /// <b>Mup448</b> /// <b>Mup449</b> /// <b>Mup450</b> /// <b>Mup451</b> /// <b>Mup452</b> /// <b>Mup453</b> /// <b>Mup454</b> /// <b>Mup455</b> /// <b>Mup456</b> /// <b>Mup457</b> /// <b>Mup458</b> /// <b>Mup459</b> /// <b>Mup460</b> /// <b>Mup461</b> /// <b>Mup462</b> /// <b>Mup463</b> /// <b>Mup464</b> /// <b>Mup465</b> /// <b>Mup466</b> /// <b>Mup467</b> /// <b>Mup468</b> /// <b>Mup469</b> /// <b>Mup470</b> /// <b>Mup471</b> /// <b>Mup472</b> /// <b>Mup473</b> /// <b>Mup474</b> /// <b>Mup475</b> /// <b>Mup476</b> /// <b>Mup477</b> /// <b>Mup478</b> /// <b>Mup479</b> /// <b>Mup480</b> /// <b>Mup481</b> /// <b>Mup482</b> /// <b>Mup483</b> /// <b>Mup484</b> /// <b>Mup485</b> /// <b>Mup486</b> /// <b>Mup487</b> /// <b>Mup488</b> /// <b>Mup489</b> /// <b>Mup490</b> /// <b>Mup491</b> /// <b>Mup492</b> /// <b>Mup493</b> /// <b>Mup494</b> /// <b>Mup495</b> /// <b>Mup496</b> /// <b>Mup497</b> /// <b>Mup498</b> /// <b>Mup499</b> /// <b>Mup500</b> /// <b>Mup501</b> /// <b>Mup502</b> /// <b>Mup503</b> /// <b>Mup504</b> /// <b>Mup505</b> /// <b>Mup506</b> /// <b>Mup507</b> /// <b>Mup508</b> /// <b>Mup509</b> /// <b>Mup510</b> /// <b>Mup511</b> /// <b>Mup512</b> /// <b>Mup513</b> /// <b>Mup514</b> /// <b>Mup515</b> /// <b>Mup516</b> /// <b>Mup517</b> /// <b>Mup518</b> /// <b>Mup519</b> /// <b>Mup520</b> /// <b>Mup521</b> /// <b>Mup522</b> /// <b>Mup523</b> /// <b>Mup524</b> /// <b>Mup525</b> /// <b>Mup526</b> /// <b>Mup527</b> /// <b>Mup528</b> /// <b>Mup529</b> /// <b>Mup530</b> /// <b>Mup531</b> /// <b>Mup532</b> /// <b>Mup533</b> /// <b>Mup534</b> /// <b>Mup535</b> /// <b>Mup536</b> /// <b>Mup537</b> /// <b>Mup538</b> /// <b>Mup539</b> /// <b>Mup540</b> /// <b>Mup541</b> /// <b>Mup542</b> /// <b>Mup543</b> /// <b>Mup544</b> /// <b>Mup545</b> /// <b>Mup546</b> /// <b>Mup547</b> /// <b>Mup548</b> /// <b>Mup549</b> /// <b>Mup550</b> /// <b>Mup551</b> /// <b>Mup552</b> /// <b>Mup553</b> /// <b>Mup554</b> /// <b>Mup555</b> /// <b>Mup556</b> /// <b>Mup557</b> /// <b>Mup558</b> /// <b>Mup559</b> /// <b>Mup560</b> /// <b>Mup561</b> /// <b>Mup562</b> /// <b>Mup563</b> /// <b>Mup564</b> /// <b>Mup565</b> /// <b>Mup566</b> /// <b>Mup567</b> /// <b>Mup568</b> /// <b>Mup569</b> /// <b>Mup570</b> /// <b>Mup571</b> /// <b>Mup572</b> /// <b>Mup573</b> /// <b>Mup574</b> /// <b>Mup575</b> /// <b>Mup576</b> /// <b>Mup577</b> /// <b>Mup578</b> /// <b>Mup579</b> /// <b>Mup580</b> /// <b>Mup581</b> /// <b>Mup582</b> /// <b>Mup583</b> /// <b>Mup584</b> /// <b>Mup585</b> /// <b>Mup586</b> /// <b>Mup587</b> /// <b>Mup588</b> /// <b>Mup589</b> /// <b>Mup590</b> /// <b>Mup591</b> /// <b>Mup592</b> /// <b>Mup593</b> /// <b>Mup594</b> /// <b>Mup595</b> /// <b>Mup596</b> /// <b>Mup597</b> /// <b>Mup598</b> /// <b>Mup599</b> /// <b>Mup600</b> /// <b>Mup601</b> /// <b>Mup602</b> /// <b>Mup603</b> /// <b>Mup604</b> /// <b>Mup605</b> /// <b>Mup606</b> /// <b>Mup607</b> /// <b>Mup608</b> /// <b>Mup609</b> /// <b>Mup610</b> /// <b>Mup611</b> /// <b>Mup612</b> /// <b>Mup613</b> /// <b>Mup614</b> /// <b>Mup615</b> /// <b>Mup616</b> /// <b>Mup617</b> /// <b>Mup618</b> /// <b>Mup619</b> /// <b>Mup620</b> /// <b>Mup621</b> /// <b>Mup622</b> /// <b>Mup623</b> /// <b>Mup624</b> /// <b>Mup625</b> /// <b>Mup626</b> /// <b>Mup627</b> /// <b>Mup628</b> /// <b>Mup629</b> /// <b>Mup630</b> /// <b>Mup631</b> /// <b>Mup632</b> /// <b>Mup633</b> /// <b>Mup634</b> /// <b>Mup635</b> /// <b>Mup636</b> /// <b>Mup637</b> /// <b>Mup638</b> /// <b>Mup639</b> /// <b>Mup640</b> /// <b>Mup641</b> /// <b>Mup642</b> /// <b>Mup643</b> /// <b>Mup644</b> /// <b>Mup645</b> /// <b>Mup646</b> /// <b>Mup647</b> /// <b>Mup648</b> /// <b>Mup649</b> /// <b>Mup650</b> /// <b>Mup651</b> /// <b>Mup652</b> /// <b>Mup653</b> /// <b>Mup654</b> /// <b>Mup655</b> /// <b>Mup656</b> /// <b>Mup657</b> /// <b>Mup658</b> /// <b>Mup659</b> /// <b>Mup660</b> /// <b>Mup661</b> /// <b>Mup662</b> /// <b>Mup663</b> /// <b>Mup664</b> /// <b>Mup665</b> /// <b>Mup666</b> /// <b>Mup667</b> /// <b>Mup668</b> /// <b>Mup669</b> /// <b>Mup670</b> /// <b>Mup671</b> /// <b>Mup672</b> /// <b>Mup673</b> /// <b>Mup674</b> /// <b>Mup675</b> /// <b>Mup676</b> /// <b>Mup677</b> /// <b>Mup678</b> /// <b>Mup679</b> /// <b>Mup680</b> /// <b>Mup681</b> /// <b>Mup682</b> /// <b>Mup683</b> /// <b>Mup684</b> /// <b>Mup685</b> /// <b>Mup686</b> /// <b>Mup687</b> /// <b>Mup688</b> /// <b>Mup689</b> /// <b>Mup690</b> /// <b>Mup691</b> /// <b>Mup692</b> /// <b>Mup693</b> /// <b>Mup694</b> /// <b>Mup695</b> /// <b>Mup696</b> /// <b>Mup697</b> /// <b>Mup698</b> /// <b>Mup699</b> /// <b>Mup700</b> /// <b>Mup701</b> /// <b>Mup702</b> /// <b>Mup703</b> /// <b>Mup704</b> /// <b>Mup705</b> /// <b>Mup706</b> /// <b>Mup707</b> /// <b>Mup708</b> /// <b>Mup709</b> /// <b>Mup710</b> /// <b>Mup711</b> /// <b>Mup712</b> /// <b>Mup713</b> /// <b>Mup714</b> /// <b>Mup715</b> /// <b>Mup716</b> /// <b>Mup717</b> /// <b>Mup718</b> /// <b>Mup719</b> /// <b>Mup720</b> /// <b>Mup721</b> /// <b>Mup722</b> /// <b>Mup723</b> /// <b>Mup724</b> /// <b>Mup725</b> /// <b>Mup726</b> /// <b>Mup727</b> /// <b>Mup728</b> /// <b>Mup729</b> /// <b>Mup730</b> /// <b>Mup731</b> /// <b>Mup732</b> /// <b>Mup733</b> /// <b>Mup734</b> /// <b>Mup735</b> /// <b>Mup736</b> /// <b>Mup737</b> /// <b>Mup738</b> /// <b>Mup739</b> /// <b>Mup740</b> /// <b>Mup741</b> /// <b>Mup742</b> /// <b>Mup743</b> /// <b>Mup744</b> /// <b>Mup745</b> /// <b>Mup746</b> /// <b>Mup747</b> /// <b>Mup748</b> /// <b>Mup749</b> /// <b>Mup750</b> /// <b>Mup751</b> /// <b>Mup752</b> /// <b>Mup753</b> /// <b>Mup754</b> /// <b>Mup755</b> /// <b>Mup756</b> /// <b>Mup757</b> /// <b>Mup758</b> /// <b>Mup759</b> /// <b>Mup760</b> /// <b>Mup761</b> /// <b>Mup762</b> /// <b>Mup763</b> /// <b>Mup764</b> /// <b>Mup765</b> /// <b>Mup766</b> /// <b>Mup767</b> /// <b>Mup768</b> /// <b>Mup769</b> /// <b>Mup770</b> /// <b>Mup771</b> /// <b>Mup772</b> /// <b>Mup773</b> /// <b>Mup774</b> /// <b>Mup775</b> /// <b>Mup776</b> /// <b>Mup777</b> /// <b>Mup778</b> /// <b>Mup779</b> /// <b>Mup780</b> /// <b>Mup781</b> /// <b>Mup782</b> /// <b>Mup783</b> /// <b>Mup784</b> /// <b>Mup785</b> /// <b>Mup786</b> /// <b>Mup787</b> /// <b>Mup788</b> /// <b>Mup789</b> /// <b>Mup790</b> /// <b>Mup791</b> /// <b>Mup792</b> /// <b>Mup793</b> /// <b>Mup794</b> /// <b>Mup795</b> /// <b>Mup796</b> /// <b>Mup797</b> /// <b>Mup798</b> /// <b>Mup799</b> /// <b>Mup800</b> /// <b>Mup801</b> /// <b>Mup802</b> /// <b>Mup803</b> /// <b>Mup804</b> /// <b>Mup805</b> /// <b>Mup806</b> /// <b>Mup807</b> /// <b>Mup808</b> /// <b>Mup809</b> /// <b>Mup810</b> /// <b>Mup811</b> /// <b>Mup812</b> /// <b>Mup813</b> /// <b>Mup814</b> /// <b>Mup815</b> /// <b>Mup816</b> /// <b>Mup817</b> /// <b>Mup818</b> /// <b>Mup819</b> /// <b>Mup820</b> /// <b>Mup821</b> /// <b>Mup822</b> /// <b>Mup823</b> /// <b>Mup824</b> /// <b>Mup825</b> /// <b>Mup826</b> /// <b>Mup827</b> /// <b>Mup828</b> /// <b>Mup829</b> /// <b>Mup830</b> /// <b>Mup831</b> /// <b>Mup832</b> /// <b>Mup833</b> /// <b>Mup834</b> /// <b>Mup835</b> /// <b>Mup836</b> /// <b>Mup837</b> /// <b>Mup838</b> /// <b>Mup839</b> /// <b>Mup840</b> /// <b>Mup841</b> /// <b>Mup842</b> /// <b>Mup843</b> /// <b>Mup844</b> /// <b>Mup845</b> /// <b>Mup846</b> /// <b>Mup847</b> /// <b>Mup848</b> /// <b>Mup849</b> /// <b>Mup850</b> /// <b>Mup851</b> /// <b>Mup852</b> /// <b>Mup853</b> /// <b>Mup854</b> /// <b>Mup855</b> /// <b>Mup856</b> /// <b>Mup857</b> /// <b>Mup858</b> /// <b>Mup859</b> /// <b>Mup860</b> /// <b>Mup861</b> /// <b>Mup862</b> /// <b>Mup863</b> /// <b>Mup864</b> /// <b>Mup865</b> /// <b>Mup866</b> /// <b>Mup867</b> /// <b>Mup868</b> /// <b>Mup869</b> /// <b>Mup870</b> /// <b>Mup871</b> /// <b>Mup872</b> /// <b>Mup873</b> /// <b>Mup874</b> /// <b>Mup875</b> /// <b>Mup876</b> /// <b>Mup877</b> /// <b>Mup878</b> /// <b>Mup879</b> /// <b>Mup880</b> /// <b>Mup881</b> /// <b>Mup882</b> /// <b>Mup883</b> /// <b>Mup884</b> /// <b>Mup885</b> /// <b>Mup886</b> /// <b>Mup887</b> /// <b>Mup888</b> /// <b>Mup889</b> /// <b>Mup890</b> /// <b>Mup891</b> /// <b>Mup892</b> /// <b>Mup893</b> /// <b>Mup894</b> /// <b>Mup895</b> /// <b>Mup896</b> /// <b>Mup897</b> /// <b>Mup898</b> /// <b>Mup899</b> /// <b>Mup900</b> /// <b>Mup901</b> /// <b>Mup902</b> /// <b>Mup903</b> /// <b>Mup904</b> /// <b>Mup905</b> /// <b>Mup906</b> /// <b>Mup907</b> /// <b>Mup908</b> /// <b>Mup909</b> /// <b>Mup910</b> /// <b>Mup911</b> /// <b>Mup912</b> /// <b>Mup913</b> /// <b>Mup914</b> /// <b>Mup915</b> /// <b>Mup916</b> /// <b>Mup917</b> /// <b>Mup918</b> /// <b>Mup919</b> /// <b>Mup920</b> /// <b>Mup921</b> /// <b>Mup922</b> /// <b>Mup923</b> /// <b>Mup924</b> /// <b>Mup925</b> /// <b>Mup926</b> /// <b>Mup927</b> /// <b>Mup928</b> /// <b>Mup929</b> /// <b>Mup930</b> /// <b>Mup931</b> /// <b>Mup932</b> /// <b>Mup933</b> /// <b>Mup934</b> /// <b>Mup935</b> /// <b>Mup936</b> /// <b>Mup937</b> /// <b>Mup938</b> /// <b>Mup939</b> /// <b>Mup940</b> /// <b>Mup941</b> /// <b>Mup942</b> /// <b>Mup943</b> /// <b>Mup944</b> /// <b>Mup945</b> /// <b>Mup946</b> /// <b>Mup947</b> /// <b>Mup948</b> /// <b>Mup949</b> /// <b>Mup950</b> /// <b>Mup951</b> /// <b>Mup952</b> /// <b>Mup953</b> /// <b>Mup954</b> /// <b>Mup955</b> /// <b>Mup956</b> /// <b>Mup957</b> /// <b>Mup958</b> /// <b>Mup959</b> /// <b>Mup960</b> /// <b>Mup961</b> /// <b>Mup962</b> /// <b>Mup963</b> /// <b>Mup964</b> /// <b>Mup965</b> /// <b>Mup966</b> /// <b>Mup967</b> /// <b>Mup968</b> /// <b>Mup969</b> /// <b>Mup970</b> /// <b>Mup971</b> /// <b>Mup972</b> /// <b>Mup973</b> /// <b>Mup974</b> /// <b>Mup975</b> /// <b>Mup976</b> /// <b>Mup977</b> /// <b>Mup978</b> /// <b>Mup979</b> /// <b>Mup980</b> /// <b>Mup981</b> /// <b>Mup982</b> /// <b>Mup983</b> /// <b>Mup984</b> /// <b>Mup985</b> /// <b>Mup986</b> /// <b>Mup987</b> /// <b>Mup988</b> /// <b>Mup989</b> /// <b>Mup990</b> /// <b>Mup991</b> /// <b>Mup992</b> /// <b>Mup993</b> /// <b>Mup994</b> /// <b>Mup995</b> /// <b>Mup996</b> /// <b>Mup997</b> /// <b>Mup998</b> /// <b>Mup999</b> /// <b>Mup1000</b> /// <b>Mup1001</b> /// <b>Mup1002</b> /// <b>Mup1003</b> /// <b>Mup1004</b> /// <b>Mup1005</b> /// <b>Mup1006</b> /// <b>Mup1007</b> /// <b>Mup1008</b> /// <b>Mup1009</b> /// <b>Mup1010</b> /// <b>Mup1011</b> /// <b>Mup1012</b> /// <b>Mup1013</b> /// <b>Mup1014</b> /// <b>Mup1015</b> /// <b>Mup1016</b> /// <b>Mup1017</b> /// <b>Mup1018</b> /// <b>Mup1019</b> /// <b>Mup1020</b> /// <b>Mup1021</b> /// <b>Mup1022</b> /// <b>Mup1023</b> /// <b>Mup1024</b> /// <b>Mup1025</b> /// <b>Mup1026</b> /// <b>Mup1027</b> /// <b>Mup1028</b> /// <b>Mup1029</b> /// <b>Mup1030</b> /// <b>Mup1031</b> /// <b>Mup1032</b> /// <b>Mup1033</b> /// <b>Mup1034</b> /// <b>Mup1035</b> /// <b>Mup1036</b> /// <b>Mup1037</b> /// <b>Mup1038</b> /// <b>Mup1039</b> /// <b>Mup1040</b> /// <b>Mup1041</b> /// <b>Mup1042</b> /// <b>Mup1043</b> /// <b>Mup1044</b> /// <b>Mup1045</b> /// <b>Mup1046</b> /// <b>Mup1047</b> /// <b>Mup1048</b> /// <b>Mup1049</b> /// <b>Mup1050</b> /// <b>Mup1051</b> /// <b>Mup1052</b> /// <b>Mup1053</b> /// <b>Mup1054</b> /// <b>Mup1055</b> /// <b>Mup1056</b> /// <b>Mup1057</b> /// <b>Mup1058</b> /// <b>Mup1059</b> /// <b>Mup1060</b> /// <b>Mup1061</b> /// <b>Mup1062</b> /// <b>Mup1063</b> /// <b>Mup1064</b> |                                     |                                                                                          |

| RefSeq        | Tri         | p 24h  | p 48h | p 72h | FD Air | FD 24h | FD 48h | FD 72h | Gene Symbol                                                                         | Gene Title                                                                                 | Gene Ontology Biological Process                                                                |
|---------------|-------------|--------|-------|-------|--------|--------|--------|--------|-------------------------------------------------------------------------------------|--------------------------------------------------------------------------------------------|-------------------------------------------------------------------------------------------------|
| NM_011345     | ///XM       | 0.045  |       |       | -1.10  | 1.05   | -1.25  | -1.04  | <i>Sele</i>                                                                         | selectin, endothelial cell                                                                 | 0002092 // positive regulation of receptor internalization // not recorded///0002687 // p       |
| NM_0010454540 | ///         | 0.025  |       |       | -1.05  | -1.02  | -1.25  | 1.07   | <i>Gm12185</i>                                                                      | predicted gene 12185                                                                       |                                                                                                 |
| NM_0098       | 0.0232      |        |       |       | -1.25  | 1.18   | -1.25  | -1.25  | <i>Cd3g</i>                                                                         | CD3 antigen, gamma polypeptide                                                             | 0007163 // establishment or maintenance of cell polarity // not recorded///0007166 // c         |
| NM_0085       | 0.0209      |        |       |       | -1.17  | -1.04  | -1.25  | -1.29  | <i>Cxcl9</i>                                                                        | chemokine (C-X-C motif) ligand 9                                                           | 0002690 // positive regulation of leukocyte chemotaxis // not recorded///0006935 // che         |
| NM_013585     | ///XM       | 0.043  |       |       | 1.08   | 1.16   | -1.25  | 1.14   | <i>Psmb9</i>                                                                        | proteasome (prosome, macropain) subunit, beta type 9 (large multifunctional peptida        | 0002376 // immune system process // inferred from electronic annotation///0006508 //            |
| NM_001033484  | ///XM_000   | 0.021  |       | 0.021 | -1.09  | -1.09  | -1.25  | 1.09   | <i>Iqgap3</i>                                                                       | IQ motif containing GTPase activating protein 3                                            | 0000082 // G1/S transition of mitotic cell cycle // inferred from mutant phenotype///000        |
| NM_0532       | 0.0052      | 0.003  |       |       | -1.00  | -1.20  | -1.25  | 1.18   | <i>Ces1d</i>                                                                        | carboxylesterase 1D                                                                        | 0006629 // lipid metabolic process // inferred from electronic annotation///0006637 // a        |
| NM_172378     | ///XM       | 0.043  |       |       | 1.03   | -1.14  | -1.25  | -1.14  | <i>Slc22a22</i>                                                                     | solute carrier family 22 (organic cation transporter), member 22                           | 0007186 // G-protein coupled receptor signaling pathway // inferred from direct assay///        |
| NM_0089       | 0.0357      |        |       |       | 1.03   | -1.31  | -1.24  | -1.18  | <i>Prkg2</i>                                                                        | protein kinase, cGMP-dependent, type II                                                    | 0006468 // protein phosphorylation // inferred from electronic annotation///0007623 //          |
| NM_053266     | ///XM       | 0.026  |       |       | 1.05   | -1.07  | -1.24  | -1.06  | <i>Gtf2ird2</i>                                                                     | GTf2I repeat domain containing 2                                                           | 0006351 // transcription, DNA-templated // inferred from electronic annotation///00063          |
| NM_023850     | ///XM       | 0.005  |       |       | 1.13   | -1.03  | -1.24  | -1.06  | <i>Chst1</i>                                                                        | carbohydrate (keratan sulfate Gal-6) sulfotransferase 1                                    | 0005975 // carbohydrate metabolic process // inferred from electronic annotation///000          |
| NM_0078       | 0.0342      |        |       |       | -1.08  | 1.30   | -1.24  | 1.10   | <i>Ear1</i> /// <i>Ear-ps2</i> /// <i>Ear12</i> /// <i>Ear2</i> /// <i>Ear3</i>     | eosinophil-associated, ribonuclease A family, member 1///eosinophil-associated, ribor      | 0008152 // metabolic process // inferred from electronic annotation///0090305 // nuclei         |
| XM_9773       | 0.0287      |        |       |       | -1.03  | 1.47   | -1.24  | -1.17  | <i>LOC665506</i> /// <i>Trcb-J</i> /// <i>Trbc1</i> /// <i>Trbc2</i>                | T-cell receptor beta-2 chain C region-like///T cell receptor beta, joining region///T cell | receptor beta, constant region 1///T cell receptor beta, constant 2                             |
| NM_010326     | ///XM       | 0.029  |       |       | -1.04  | -1.11  | -1.24  | -1.11  | <i>Gp1ba</i>                                                                        | glycoprotein 1b, alpha polypeptide                                                         | 0000902 // cell morphogenesis // inferred from mutant phenotype///0007155 // cell adh           |
| NM_009999     | 0.04        |        |       |       | 1.02   | -1.22  | -1.24  | 1.26   | <i>Cyp2b10</i>                                                                      | cytochrome P450, family 2, subfamily b, polypeptide 10                                     | 0006805 // xenobiotic metabolic process // not recorded///0008202 // steroid metaboli           |
| NR_131197     | ///NR_      | 0.032  |       |       | 1.05   | -1.03  | -1.24  | -1.03  | <i>Ggnbp2os</i>                                                                     | gametogenin binding protein 2, opposite strand                                             |                                                                                                 |
| NM_026514     | ///XM       | 0.003  |       |       | 1.03   | -1.08  | -1.24  | -1.08  | <i>Cdc42ep3</i>                                                                     | CDC42 effector protein (Rho GTPase binding) 3                                              | 0007266 // Rho protein signal transduction // not recorded///0008360 // regulation of ce        |
| NM_134110     | ///XM_00652 | 0.024  |       | 0.024 | -1.33  | -1.34  | -1.24  | 1.14   | <i>Kcne2</i>                                                                        | potassium voltage-gated channel, Isk-related subfamily, gene 2                             | 0006810 // transport // inferred from electronic annotation///0006811 // ion transport /        |
| NM_009994     | ///XM       | 0.037  |       |       | 1.04   | -1.00  | -1.23  | -1.09  | <i>Cyp1b1</i>                                                                       | cytochrome P450, family 1, subfamily b, polypeptide 1                                      | 0001525 // angiogenesis // inferred from mutant phenotype///0002930 // trabecular me            |
| NR_028574     | 0.034       | 0.034  |       |       | 1.03   | 1.04   | -1.23  | -1.09  | <i>Snhg8</i>                                                                        | small nucleolar RNA host gene 8                                                            |                                                                                                 |
| NM_023168     | ///XM       | 0.008  |       |       | 1.00   | 1.03   | -1.23  | 1.05   | <i>Grina</i>                                                                        | glutamate receptor, ionotropic, N-methyl D-aspartate-associated protein 1 (glutamate       | 0032469 // endoplasmic reticulum calcium ion homeostasis // inferred from direct assay/         |
| NM_0011       | 0.0132      |        |       |       | -1.06  | 1.02   | -1.23  | -1.07  | <i>Tshr</i>                                                                         | thyroid stimulating hormone receptor                                                       | 0007165 // signal transduction // inferred from electronic annotation///0007186 // G-pr         |
| NM_019431     | 0.003       |        |       |       | 1.04   | -1.01  | -1.23  | -1.03  | <i>Cacng4</i>                                                                       | calcium channel, voltage-dependent, gamma subunit 4                                        | 0006810 // transport // inferred from electronic annotation///0006811 // ion transport /        |
| NM_0010       | 0.0456      | 0.007  |       |       | 1.03   | -1.14  | -1.23  | -1.05  | <i>Calca</i>                                                                        | calcitonin/calcitonin-related polypeptide, alpha                                           | 0001976 // neurological system process involved in regulation of systemic arterial blood p      |
| NM_031377     | ///XM       | 0.008  |       |       | 1.04   | -1.04  | -1.23  | -1.08  | <i>Pramel1</i>                                                                      | preferentially expressed antigen in melanoma-like 1                                        | 0008284 // positive regulation of cell proliferation // inferred from electronic annotation,    |
| XM_9773       | 0.0133      |        |       |       | -1.05  | 1.45   | -1.23  | -1.17  | <i>LOC665506</i> /// <i>Trbc2</i> /// <i>Trcb-J</i> /// <i>Trbc1</i>                | T-cell receptor beta-2 chain C region-like///T cell receptor beta, constant 2///T cell     | receptor beta, joining region///T cell receptor beta, constant region 1                         |
| NM_0280       | 0.0151      | 0.007  | ##### |       | 1.12   | -1.09  | -1.23  | -1.24  | <i>Cyp2c55</i>                                                                      | cytochrome P450, family 2, subfamily c, polypeptide 55                                     | 0006805 // xenobiotic metabolic process // not recorded///0019369 // arachidonic acid i         |
| NM_001253692  | ///         | 0.002  |       |       | -1.03  | -1.01  | -1.23  | 1.06   | <i>Elmod3</i>                                                                       | ELMO/CEB-12 domain containing 3                                                            |                                                                                                 |
| NM_0010       | 0.041       |        |       |       | 1.01   | -1.24  | -1.23  | -1.18  | <i>Sepp1</i>                                                                        | selenoprotein P, plasma, 1                                                                 | 0001887 // selenium compound metabolic process // inferred from direct assay///00018            |
| NM_172584     | 0.007       |        |       |       | 1.04   | -1.04  | -1.23  | -1.04  | <i>Itpk1</i>                                                                        | inositol 1,3,4-triphosphate 5/6 kinase                                                     | 0016310 // phosphorylation // inferred from electronic annotation///0032957 // inositol         |
| NM_001160163  | ///         | 0.034  |       |       | 1.13   | -1.02  | -1.23  | -1.05  | <i>Neu2</i>                                                                         | neuraminidase 2                                                                            | 0005975 // carbohydrate metabolic process // inferred from electronic annotation///000          |
| NM_0012       | 0.0127      |        |       |       | -1.21  | 1.24   | -1.23  | -1.21  | <i>Csf3r</i>                                                                        | colony stimulating factor 3 receptor (granulocyte)                                         | 0007155 // cell adhesion // inferred from electronic annotation///0019221 // cytokine-m         |
| NM_001083959  | ///         | 0.028  | 0.018 |       | 1.07   | -1.06  | -1.23  | -1.16  | <i>Spo11</i>                                                                        | SPO11 meiotic protein covalently bound to DSB                                              | 0000237 // leptotene // inferred from mutant phenotype///0000737 // DNA catalytic pr            |
| NM_0010       | 0.0157      |        |       |       | -1.12  | -1.57  | -1.22  | 1.01   | <i>Otud7b</i>                                                                       | OTU domain containing 7B                                                                   | 0000122 // negative regulation of transcription from RNA polymerase II promoter // infer        |
| NM_0011       | 0.0043      | 0.004  | 0.032 |       | 1.03   | -1.11  | -1.22  | -1.13  | <i>Smoc1</i>                                                                        | SPARC related modular calcium binding 1                                                    | 0001654 // eye development // inferred from mutant phenotype///0001654 // eye devel             |
| NM_008256     | 0.009       | 0.012  |       |       | 1.24   | 1.05   | -1.22  | -1.09  | <i>Hmgcs2</i>                                                                       | 3-hydroxy-3-methylglutaryl-Coenzyme A synthase 2                                           | 0001822 // kidney development // inferred from electronic annotation///0001889 // live          |
| NM_0268       | 0.0175      | 0.011  |       |       | 1.01   | 1.24   | -1.22  | -1.22  | <i>Cd177</i>                                                                        | CD177 antigen                                                                              |                                                                                                 |
| NM_0097       | 0.0184      |        |       |       | -1.04  | -1.32  | -1.22  | 1.12   | <i>Aspm</i>                                                                         | asp (abnormal spindle)-like, microcephaly associated (Drosophila)                          | 0001764 // neuron migration // inferred from genetic interaction///0001764 // neuron m          |
| XM_9773       | 0.0143      | 0.0049 |       |       | -1.05  | 1.39   | -1.22  | -1.16  | <i>LOC665506</i> /// <i>Trbc2</i> /// <i>Trcb-J</i> /// <i>Trbc1</i> /// <i>Trt</i> | T-cell receptor beta-2 chain C region-like///T cell receptor beta, constant 2///T cell     | receptor beta, joining region///T cell receptor beta, constant region 1///T cell receptor beta, |
|               |             |        |       |       | -1.15  | 1.71   | -1.22  | -1.15  | <i>Iglv1</i> /// <i>Igllc1</i>                                                      | immunoglobulin lambda variable 1///immunoglobulin lambda constant 1                        |                                                                                                 |
| NR_003964     | 0.006       |        |       |       | 1.03   | -1.06  | -1.22  | -1.14  | <i>Tubb2a-ps2</i>                                                                   | tubulin, beta 2a, pseudogene 2                                                             |                                                                                                 |
| NM_1460       | 0.0038      | 0.008  |       |       | 1.06   | -1.16  | -1.22  | -1.07  | <i>Zdhhc14</i>                                                                      | zinc finger, DHHC domain containing 14                                                     | 0006612 // protein targeting to membrane // ---///0018230 // peptidyl-L-cysteine S-palm         |
| NM_153067     | 0.049       |        |       |       | 1.01   | -1.23  | -1.22  | -1.11  | <i>Mrgpra3</i>                                                                      | MAS-related GPR, member A3                                                                 | 0006953 // acute-phase response // inferred from electronic annotation///0007165 // si          |
| NM_001308501  | ///         | 0.023  |       |       | 1.11   | -1.04  | -1.21  | -1.22  | <i>Gpr50</i>                                                                        | G-protein-coupled receptor 50                                                              | 0007165 // signal transduction // inferred from electronic annotation///0007166 // cell s       |
| NM_0011       | 0.0485      |        |       |       | -1.10  | 1.12   | -1.21  | -1.08  | <i>Ccr6</i>                                                                         | chemokine (C-C motif) receptor 6                                                           | 0006955 // chemotaxis // inferred from electronic annotation///0006955 // immune res            |
| NM_0012       | 0.0408      | 0.015  |       |       | 1.07   | -1.13  | -1.21  | -1.04  | <i>Ebf2</i>                                                                         | early B cell factor 2                                                                      | 0001709 // cell fate determination // inferred from direct assay///0006351 // transcripti       |
| NM_0013       | 0.0309      | 0.005  | 0.03  |       | 1.11   | -1.04  | -1.21  | -1.11  | <i>Stmn4</i>                                                                        | stathmin-like 4                                                                            | 0007019 // microtubule depolymerization // not recorded///0031110 // regulation of mi           |
| NM_001082531  | ///         | 0.048  |       |       | 1.01   | -1.07  | -1.21  | -1.09  | <i>Pla2g2a</i>                                                                      | phospholipase A2, group IIA (platelets, synovial fluid)                                    | 0006629 // lipid metabolic process // inferred from electronic annotation///0006644 // p        |
| NM_138683     | ///XM       | 0.004  |       |       | 1.21   | -1.05  | -1.21  | -1.09  | <i>Rspo1</i>                                                                        | R-spondin 1                                                                                | 0001934 // positive regulation of protein phosphorylation // not recorded///0002090 //          |
| NM_030720     | ///XM       | 0.017  |       |       | 1.03   | 1.12   | -1.21  | -1.08  | <i>Gpr84</i>                                                                        | G-protein-coupled receptor 84                                                              | 0007165 // signal transduction // inferred from electronic annotation///0007186 // G-pr         |
| NM_1336       | 0.0271      |        |       |       | 1.13   | -1.45  | -1.21  | 1.06   | <i>Sult1a1</i>                                                                      | sulfotransferase family 1A, phenol-preferring, member 1                                    | 0006584 // catecholamine metabolic process // not recorded///0006629 // lipid metabol           |
| NM_001013373  | ///         | 0.031  |       |       | -1.04  | -1.12  | -1.21  | -1.18  | <i>Tmprss13</i>                                                                     | transmembrane protease, serine 13                                                          | 0006508 // proteolysis // inferred from electronic annotation///0006898 // receptor-mec         |
| NM_0010       | 0.0433      | 0.04   |       |       | 1.03   | -1.07  | -1.21  | -1.12  | <i>Arsi</i>                                                                         | arylsulfatase i                                                                            | 0008152 // metabolic process // inferred from electronic annotation                             |
| NM_178086     | 0.009       | 0.002  |       |       | 1.03   | -1.10  | -1.21  | -1.23  | <i>Fa2h</i>                                                                         | fatty acid 2-hydroxylase                                                                   | 0001949 // sebaceous gland cell differentiation // inferred from mutant phenotype///000         |
| NM_007574     | 0.02        |        |       |       | -1.00  | -1.05  | -1.21  | -1.05  | <i>C1qc</i>                                                                         | complement component 1, q subcomponent, C chain                                            | 0002376 // immune system process // inferred from electronic annotation///0006958 //            |
| NM_0011       | 0.0159      |        |       |       | 1.15   | -1.40  | -1.21  | 1.01   | <i>Sphk1</i>                                                                        | sphingosine kinase 1                                                                       | 0001568 // blood vessel development // inferred from genetic interaction///0001934 // s         |
| NM_133667     | ///XM       | 0.008  |       |       | 1.14   | -1.00  | -1.21  | 1.11   | <i>Pdk2</i>                                                                         | pyruvate dehydrogenase kinase, isoenzyme 2                                                 | 0005975 // carbohydrate metabolic process // inferred from electronic annotation///000          |
| NM_183171     | ///XM       | 0.042  | 0.04  |       | 1.07   | -1.04  | -1.21  | -1.14  | <i>Fez1</i>                                                                         | fasciculation and elongation protein zeta 1 (zygin I)                                      | 0006810 // transport // inferred from electronic annotation///0010976 // positive regula        |
| NM_0012       | 0.03        |        |       |       | -1.09  | -1.21  | -1.21  | -1.01  | <i>Gsn</i>                                                                          | gelsolin                                                                                   | 0006911 // phagocytosis, engulfment // inferred from mutant phenotype///0006915 // a            |
| NM_013751     | ///XM       | 0.041  |       |       | -1.05  | 1.01   | -1.21  | -1.13  | <i>Hrasls</i>                                                                       | HRAS-like suppressor                                                                       | 0001558 // regulation of cell growth // traceable author statement///0006629 // lipid me        |
| NM_145364     | ///XM       | 0.049  |       |       | -1.05  | 1.01   | -1.21  | -1.14  | <i>Akr1d1</i>                                                                       | aldo-keto reductase family 1, member D1                                                    | 0006629 // lipid metabolic process // inferred from electronic annotation///0006699 // b        |
| NM_010180     | ///XM_00652 | 0.003  |       | 0.003 | -1.27  | -1.22  | -1.21  | -1.03  | <i>Fbln1</i>                                                                        | fibulin 1                                                                                  | 0001933 // negative regulation of protein phosphorylation // not recorded///0007162 //          |
| NM_001165256  | ///         | 0.003  | 0.046 |       | 1.16   | 1.07   | -1.20  | -1.06  | <i>Dcaf4</i>                                                                        | DDb1 and CUL4 associated factor 4                                                          |                                                                                                 |
| NM_0012       | 0.0324      |        |       |       | 1.01   | -1.19  | -1.20  | 1.07   | <i>Myh14</i>                                                                        | myosin, heavy polypeptide 14                                                               | 0003009 // skeletal muscle contraction // not recorded///0007519 // skeletal muscle tiss        |

| RefSeq       | Tr       | p     | 24h | p | 48h   | p     | 72h | FD Air | FD 24h | FD 48h | FD 72h | Gene Symbol                                 | Gene Title                                                                                | Gene Ontology Biological Process                                                            |
|--------------|----------|-------|-----|---|-------|-------|-----|--------|--------|--------|--------|---------------------------------------------|-------------------------------------------------------------------------------------------|---------------------------------------------------------------------------------------------|
|              |          |       |     |   | 0.004 |       |     | -1.04  | -1.05  | -1.20  | -1.20  | <i>Tcrg-C4</i>                              | T cell receptor gamma, constant 4                                                         |                                                                                             |
| NM_001033263 | ///      |       |     |   | 0.032 |       |     | 1.09   | -1.01  | -1.20  | -1.12  | <i>Agap2</i>                                | ArfGAP with GTPase domain, ankyrin repeat and PH domain 2                                 | 0007264 // small GTPase mediated signal transduction // inferred from electronic annota     |
| NM_00131     | 0.0134   | 0.01  |     |   |       |       |     | 1.12   | -1.19  | -1.20  | -1.17  | <i>Ctj1</i>                                 | cardiotrophin 1                                                                           | 0007166 // cell surface receptor signaling pathway // not recorded///0007399 // nervou      |
| NM_013638    |          | 0.025 |     |   |       |       |     | 1.02   | 1.02   | -1.20  | -1.05  | <i>Ptm3</i>                                 | protamine 3                                                                               | 0007275 // multicellular organismal development // inferred from electronic annotation/     |
| NM_00131     | 0.0364   |       |     |   |       |       |     | -1.01  | 1.22   | -1.20  | -1.16  | <i>Irf8</i>                                 | interferon regulatory factor 8                                                            | 0006351 // transcription, DNA-templated // inferred from electronic annotation///00063      |
| NM_001286015 | ///      |       |     |   | 0.033 |       |     | 1.04   | -1.10  | -1.20  | -1.03  | <i>Csn1s1</i>                               | casein alpha s1                                                                           | 0006810 // transport // inferred from electronic annotation                                 |
| NM_001170638 | ///      |       |     |   | 0.017 |       |     | 1.10   | -1.02  | -1.20  | -1.02  | <i>Slc17a1</i>                              | solute carrier family 17 (sodium phosphate), member 1                                     | 0006810 // transport // inferred from electronic annotation///0006811 // ion transport /    |
| NM_029901    |          | 0.025 |     |   |       |       |     | 1.01   | -1.05  | -1.20  | -1.13  | <i>Akr1c21</i>                              | aldo-keto reductase family 1, member C21                                                  | 0006629 // lipid metabolic process // inferred from electronic annotation///0006694 // s    |
| NM_148940    | ///XM    |       |     |   | 0.019 | 0.016 |     | -1.03  | -1.08  | -1.20  | -1.18  | <i>Prss44</i>                               | protease, serine 44                                                                       | 0006508 // proteolysis // inferred from electronic annotation///0007281 // germ cell dev    |
| NM_0137      | 0.0242   | 0.005 |     |   |       |       |     | 1.08   | -1.17  | -1.20  | -1.04  | <i>Slco1a1</i>                              | solute carrier organic anion transporter family, member 1a1                               | 0006810 // transport // inferred from electronic annotation///0006811 // ion transport /    |
| NM_0010      | 0.0498   |       |     |   |       |       |     | -1.20  | -1.47  | -1.20  | -1.10  | <i>Hspa2</i>                                | heat shock protein 2                                                                      | 0001934 // positive regulation of protein phosphorylation // inferred from mutant phen      |
| NM_0097      | 0.0019   |       |     |   |       |       |     | 1.09   | -1.32  | -1.20  | 1.06   | <i>Bnip3</i>                                | BCL2/adenovirus E1B interacting protein 3                                                 | 0001666 // response to hypoxia // not recorded///0006915 // apoptotic process // not r      |
| NM_008993    | ///XM    |       |     |   | 0.032 |       |     | -1.06  | -1.12  | -1.20  | -1.15  | <i>Pxmp2</i>                                | peroxisomal membrane protein 2                                                            |                                                                                             |
| NM_145077    |          | 0.011 |     |   |       | 0.019 |     | 1.10   | -1.04  | -1.20  | -1.21  | <i>Ucn2</i>                                 | urocortin 2                                                                               | 0006171 // cAMP biosynthetic process // inferred from sequence or structural similarity,/   |
| NM_009396    | ///XM    |       |     |   | 0.005 |       |     | 1.03   | 1.09   | -1.20  | 1.02   | <i>Tnfaip2</i>                              | tumor necrosis factor, alpha-induced protein 2                                            | 0001525 // angiogenesis // inferred from electronic annotation///0006887 // exocytosis,     |
| NM_139197    | ///XM    |       |     |   | 0.032 |       |     | 1.03   | 1.00   | -1.20  | -1.14  | <i>Gbgt1</i>                                | glucosyltransferase 1, 3-N-acetylgalactosaminyltransferase 1                              | 0005975 // carbohydrate metabolic process // inferred from electronic annotation///000      |
| NM_010781    | ///XM    |       |     |   | 0.008 | 0.015 |     | 1.05   | 1.02   | -1.20  | -1.17  | <i>Tpsb2</i>                                | trypsin beta 2                                                                            | 0006508 // proteolysis // inferred from electronic annotation///0006954 // inflammatory     |
| NM_019485    |          | 0.045 |     |   |       |       |     | 1.05   | -1.10  | -1.19  | -1.08  | <i>Olfir70</i>                              | olfactory receptor 70                                                                     | 0007165 // signal transduction // inferred from electronic annotation///0007186 // G-pr     |
| NM_0134      | #####    | 0.01  |     |   |       |       |     | 1.04   | -1.20  | -1.19  | 1.03   | <i>C2</i>                                   | complement component 2 (within H-2S)                                                      | 0002376 // immune system process // inferred from electronic annotation///0006508 //        |
| NM_023617    | ///XM    |       |     |   | 0.002 |       |     | 1.11   | 1.04   | -1.19  | 1.23   | <i>Aox3</i>                                 | aldehyde oxidase 3                                                                        | 0005114 // oxidation-reduction process // inferred from electronic annotation               |
| NM_008780    | ///XM    |       |     |   | 0.04  |       |     | -1.01  | -1.05  | -1.19  | -1.11  | <i>Pax1</i>                                 | paired box 1                                                                              | 0001501 // skeletal system development // inferred from genetic interaction///0001501,      |
| NM_025777    |          | 0.017 |     |   |       |       |     | 1.03   | 1.00   | -1.19  | -1.13  | <i>Duoxa2</i>                               | dual oxidase maturation factor 2                                                          | 0006810 // transport // inferred from electronic annotation///0015031 // protein transp     |
| NM_1461      | 0.0226   |       |     |   |       |       |     | -1.20  | 1.07   | -1.19  | -1.02  | <i>Gimap7</i>                               | GTPase, IMAP family member 7                                                              | 0008152 // metabolic process // inferred from electronic annotation                         |
| NM_145827    | ///XM    |       |     |   | 0.021 |       |     | 1.01   | 1.01   | -1.19  | -1.04  | <i>Nlrp3</i>                                | NLR family, pyrin domain containing 3                                                     | 0002376 // immune system process // inferred from electronic annotation///0002674 //        |
| NM_010951    | ///XM    |       |     |   | 0.004 |       |     | 1.00   | -1.11  | -1.19  | -1.09  | <i>Gpr143</i>                               | G protein-coupled receptor 143                                                            | 0007165 // signal transduction // inferred from electronic annotation///0007186 // G-pr     |
| NM_032465    |          | 0.045 |     |   |       |       |     | 1.04   | -1.00  | -1.19  | -1.15  | <i>Cd96</i>                                 | CD96 antigen                                                                              | 0007155 // cell adhesion // inferred from electronic annotation                             |
| NM_001310464 | ///      |       |     |   | 0.033 |       |     | 1.12   | -1.12  | -1.19  | 1.01   | <i>Reln</i>                                 | reelin                                                                                    | 0000904 // cell morphogenesis involved in differentiation // inferred from mutant pheno     |
| NM_145229    |          | 0.011 |     |   |       |       |     | -1.01  | 1.01   | -1.19  | -1.16  | <i>AY074887</i>                             | cDNA sequence AY074887                                                                    | 0007050 // cell cycle arrest // inferred from direct assay///0008285 // negative regulati   |
| NM_053224    |          |       |     |   |       | 0.018 |     | -1.07  | -1.14  | -1.19  | -1.33  | <i>Vmn1r54</i>                              | vomeronal 1 receptor 54                                                                   | 0007165 // signal transduction // inferred from electronic annotation///0007186 // G-pr     |
| NM_0134      | 0.0425   |       |     |   |       |       |     | 1.00   | -1.14  | -1.19  | -1.11  | <i>Bcl2l10</i>                              | Bcl2-like 10                                                                              | 0006915 // apoptotic process // inferred from electronic annotation///0008625 // extrin:    |
| NM_001080809 | ///      |       |     |   | 0.042 |       |     | 1.00   | -1.18  | -1.19  | -1.15  | <i>Cps1</i>                                 | carbamoyl-phosphate synthetase 1                                                          | 0000050 // urea cycle // not recorded///0000050 // urea cycle // inferred by curator///0    |
| NM_008344    |          | 0.026 |     |   |       |       |     | 1.26   | 1.09   | -1.19  | -1.07  | <i>Igfbp6</i>                               | insulin-like growth factor binding protein 6                                              | 0001558 // regulation of cell growth // inferred from electronic annotation///0043567 //    |
| NM_0083      | 0.0207   |       |     |   |       |       |     | 1.26   | 1.09   | -1.19  | -1.07  | <i>Igfbp6</i>                               | insulin-like growth factor binding protein 6                                              | 0001558 // regulation of cell growth // inferred from electronic annotation///0043567 //    |
| NM_0010      | 0.0227   |       |     |   |       |       |     | -1.10  | 1.39   | -1.19  | 1.12   | <i>Ear-ps2///Ear1///Ear12///Ear2///Ear3</i> | eosinophil-associated, ribonuclease A family, pseudogene 2//eosinophil-associated, r      | 0006935 // chemotaxis // inferred from direct assay///0008152 // metabolic process // tr    |
| NM_013666    | ///NM    |       |     |   | 0.012 |       |     | -1.00  | -1.02  | -1.19  | -1.13  | <i>St8sia5</i>                              | ST8 alpha-N-acetylneuraminidase alpha-2,8-sialyltransferase 5                             | 0006486 // protein glycosylation // inferred from electronic annotation///0097503 // sial   |
| NM_0082      | 0.0078   |       |     |   |       |       |     | -1.06  | 1.34   | -1.19  | -1.18  | <i>H2-Oa</i>                                | histocompatibility 2, O region alpha locus                                                | 0002376 // immune system process // inferred from electronic annotation///0002504 //        |
| NM_001160406 | ///      |       |     |   | 0.039 |       |     | -1.04  | -1.02  | -1.19  | -1.12  | <i>Gfi1b</i>                                | growth factor independent 1B                                                              | 0000122 // negative regulation of transcription from RNA polymerase II promoter // not r    |
| NM_013616    |          | ##### |     |   |       |       |     | -1.03  | 1.04   | -1.19  | -1.27  | <i>Olfir65</i>                              | olfactory receptor 65                                                                     | 0007165 // signal transduction // not recorded///0007186 // G-protein coupled receptor      |
| NM_010468    |          | 0.035 |     |   |       |       |     | 1.01   | 1.06   | -1.19  | -1.10  | <i>Hoxd3</i>                                | homeobox D3                                                                               | 0006351 // transcription, DNA-templated // not recorded///0006355 // regulation of tra      |
| NM_001282040 | ///NM_00 |       |     |   | 0.041 |       |     | 1.08   | 1.06   | -1.18  | 1.17   | <i>Pmm1</i>                                 | phosphomannomutase 1                                                                      | 0006013 // mannose metabolic process // not recorded///0008152 // metabolic process         |
| NM_001163270 | ///      |       |     |   | 0.027 |       |     | 1.06   | -1.00  | -1.18  | -1.12  | <i>Baiap3</i>                               | BAI1-associated protein 3                                                                 | 0007186 // G-protein coupled receptor signaling pathway // not recorded                     |
| NM_2015      | 0.0434   |       |     |   |       |       |     | -1.07  | -1.27  | -1.18  | 1.05   | <i>Lmo7</i>                                 | LIM domain only 7                                                                         | 0016337 // single organismal cell-cell adhesion // not recorded///0023051 // regulatio      |
| NM_1530      | 0.0434   |       |     |   |       |       |     | 1.04   | -1.12  | -1.18  | -1.10  | <i>Hrh4</i>                                 | histamine receptor H4                                                                     | 0006954 // inflammatory response // not recorded///0006954 // inflammatory response         |
| NM_0107      | 0.0034   | 0.008 |     |   |       |       |     | 1.10   | -1.09  | -1.18  | -1.10  | <i>Lgals4</i>                               | lectin, galactose binding, soluble 4                                                      |                                                                                             |
| NM_133922    | ///XM    |       |     |   | 0.045 |       |     | 1.01   | 1.06   | -1.18  | -1.08  | <i>Krba1</i>                                | KRAB-A domain containing 1                                                                |                                                                                             |
| NM_015732    | ///XM    |       |     |   | 0.049 |       |     | 1.01   | -1.09  | -1.18  | -1.09  | <i>Axin2</i>                                | axin2                                                                                     | 0001756 // somitogenesis // inferred from direct assay///0001934 // positive regulatio      |
| NM_0011      | 0.0021   | 0.014 |     |   |       | 0.009 |     | 1.04   | -1.33  | -1.18  | -1.22  | <i>Ccl20</i>                                | chemokine (C-C motif) ligand 20                                                           | 0002548 // monocyte chemotaxis // --//0006935 // chemotaxis // not recorded///0006          |
| NM_026410    |          |       |     |   |       | 0.037 |     | -1.14  | 1.05   | -1.18  | 1.04   | <i>Cdca5</i>                                | cell division cycle associated 5                                                          | 0000082 // G1/S transition of mitotic cell cycle // not recorded///0006302 // double-str    |
| NM_0196      | 0.0329   |       |     |   |       |       |     | -1.01  | 1.40   | -1.18  | -1.21  | <i>Rrad</i>                                 | Ras-related associated with diabetes                                                      | 0007165 // signal transduction // inferred from electronic annotation///0007264 // small    |
| NM_001277847 | ///      |       |     |   | 0.045 |       |     | 1.09   | -1.05  | -1.18  | -1.10  | <i>Treh</i>                                 | trehalase (brush-border membrane glycoprotein)                                            | 0005991 // trehalose metabolic process // inferred from electronic annotation///000599      |
| NM_0011      | 0.0226   |       |     |   |       |       |     | -1.01  | -1.36  | -1.18  | -1.02  | <i>Vldlr</i>                                | very low density lipoprotein receptor                                                     | 0000122 // negative regulation of transcription from RNA polymerase II promoter // infer    |
| NM_001199971 | ///      |       |     |   | 0.017 |       |     | 1.04   | -1.02  | -1.18  | -1.11  | <i>Tac2</i>                                 | tachykinin 2                                                                              | 0007217 // tachykinin receptor signaling pathway // inferred from electronic annotation/    |
| NM_026680    | ///NM    |       |     |   | 0.004 |       |     | 1.03   | -1.08  | -1.18  | -1.02  | <i>Golt1a///Kiss1</i>                       | golgi transport 1 homolog A (S. cerevisiae)///KISS-1 metastasis-suppressor                | 0006629 // lipid metabolic process // not recorded///0006810 // transport // inferred fr    |
| NM_0013      | 0.0492   | 0.034 |     |   |       |       |     | 1.02   | -1.11  | -1.18  | -1.12  | <i>Gpr83</i>                                | G protein-coupled receptor 83                                                             | 0007165 // signal transduction // inferred from electronic annotation///0007166 // cell s   |
| NM_011680    | ///XM    |       |     |   | 0.01  | 0.022 |     | 1.06   | 1.01   | -1.18  | -1.10  | <i>Usf2</i>                                 | upstream transcription factor 2                                                           | 0000432 // positive regulation of transcription from RNA polymerase II promoter by gluc     |
| NM_001291065 | ///      |       |     |   | 0.022 |       |     | 1.05   | 1.02   | -1.18  | -1.08  | <i>Foxa2</i>                                | forkhead box A2                                                                           | 0000432 // positive regulation of transcription from RNA polymerase II promoter by gluc     |
| NM_008571    | ///XM    |       |     |   | 0.015 |       |     | -1.04  | -1.03  | -1.18  | -1.20  | <i>Mcpt2</i>                                | mast cell protease 2                                                                      | 0006508 // proteolysis // inferred from electronic annotation///0016485 // protein proc     |
| NM_011172    | ///XM    |       |     |   | 0.027 |       |     | 1.13   | 1.04   | -1.18  | -1.05  | <i>Prodh</i>                                | proline dehydrogenase                                                                     | 0006560 // proline metabolic process // inferred from electronic annotation///0006562 /     |
| NM_001168498 | ///      |       |     |   | 0.044 |       |     | 1.03   | -1.09  | -1.18  | -1.09  | <i>Ncmap</i>                                | noncompact myelin associated protein                                                      | 0031643 // positive regulation of myelination // not recorded///0032290 // peripheral ne    |
| NM_0011      | 0.0321   |       |     |   |       |       |     | -1.27  | 1.01   | -1.18  | -1.33  | <i>Clec4d</i>                               | C-type lectin domain family 4, member d                                                   | 0002250 // adaptive immune response // inferred from mutant phenotype///0002292 //          |
| NM_013750    |          | 0.039 |     |   |       |       |     | -1.02  | -1.11  | -1.18  | -1.13  | <i>Phlda3</i>                               | pleckstrin homology-like domain, family A, member 3                                       | 0006915 // apoptotic process // inferred from electronic annotation///0042771 // intrin     |
| NM_001001892 | ///      |       |     |   | 0.041 |       |     | -1.07  | 1.05   | -1.18  | -1.08  | <i>H2-K1///H2-D1</i>                        | histocompatibility 2, K1, K region///histocompatibility 2, D region locus 1///H-2 class I | 0001916 // positive regulation of T cell mediated cytotoxicity // inferred from direct assa |
| NM_133831    |          | 0.046 |     |   |       |       |     | 1.10   | 1.14   | -1.18  | -1.20  | <i>Gltscr2</i>                              | glioma tumor suppressor candidate region gene 2                                           |                                                                                             |
| NM_0169      | 0.0032   |       |     |   |       |       |     | -1.06  | 1.30   | -1.18  | -1.24  | <i>Ptprcap</i>                              | protein tyrosine phosphatase, receptor type, C polypeptide-associated protein             | 0006468 // protein phosphorylation // inferred from direct assay///0006468 // protein p     |

| RefSeq       | Tri      | p 24h  | p 48h | p 72h | FD Air | FD 24h | FD 48h | FD 72h | Gene Symbol                               | Gene Title                                                                              | Gene Ontology Biological Process                                                             |
|--------------|----------|--------|-------|-------|--------|--------|--------|--------|-------------------------------------------|-----------------------------------------------------------------------------------------|----------------------------------------------------------------------------------------------|
| NM_153097    |          | 0.033  |       |       | 1.06   | -1.10  | -1.18  | -1.08  | <i>Trim60</i>                             | tripartite motif-containing 60                                                          |                                                                                              |
| NM_0540      | 0.0317   |        |       |       | -1.02  | -1.18  | -1.18  | -1.07  | <i>Pnpla3</i>                             | patatin-like phospholipase domain containing 3                                          | 0006629 // lipid metabolic process // inferred from electronic annotation///0008152 // n     |
| NM_001031622 | ///NM_00 | 0.047  |       |       | 1.00   | -1.05  | -1.18  | -1.20  | <i>Gm16367</i> ///Gm16427///Gm16513///Gm3 | predicted gene 16367///predicted gene 16427///predicted gene, Gm16513///predicte        | 0008284 // positive regulation of cell proliferation // inferred from electronic annotation/ |
| NM_0099      | 0.0187   |        |       |       | -1.16  | -1.04  | -1.18  | -1.19  | <i>Cst7</i>                               | cystatin F (leukocystatin)                                                              | 0010466 // negative regulation of peptidase activity // inferred from electronic annotatio   |
| NM_0103      | #####    |        | 0.02  |       | -1.31  | 1.01   | -1.18  | -1.16  | <i>H2-Q10</i>                             | histocompatibility 2, Q region locus 10                                                 | 0002376 // immune system process // inferred from electronic annotation///0002474 //         |
| NM_019540    |          | 0.027  |       |       | 1.01   | -1.12  | -1.18  | -1.10  | <i>Pfpl</i>                               | pore forming protein-like                                                               |                                                                                              |
| NM_153789    |          | 0.017  |       |       | 1.22   | 1.30   | -1.18  | 1.07   | <i>Mylip</i>                              | myosin regulatory light chain interacting protein                                       | 0006928 // movement of cell or subcellular component // not recorded///0007399 // nei        |
| NM_009800    | ///XM    | 0.044  |       |       | -1.02  | -1.09  | -1.18  | -1.10  | <i>Car11</i>                              | carbonic anhydrase 11                                                                   |                                                                                              |
| NM_001077696 | ///      | 0.047  |       |       | 1.09   | 1.15   | -1.18  | 1.13   | <i>Hdac5</i>                              | histone deacetylase 5                                                                   | 0000122 // negative regulation of transcription from RNA polymerase II promoter // infer     |
| NM_001190357 | ///      | 0.034  |       |       | 1.04   | -1.02  | -1.17  | -1.12  | <i>Carkd</i>                              | carbohydrate kinase domain containing                                                   | 0008152 // metabolic process // inferred from electronic annotation                          |
| NM_0205      | 0.0418   |        |       |       | 1.14   | -1.04  | -1.17  | 1.05   | <i>Slc25a20</i>                           | solute carrier family 25 (mitochondrial carnitine/acylcarnitine translocase), member 20 | 0006810 // transport // inferred from electronic annotation                                  |
| NM_021287    | ///XM    | 0.049  |       |       | 1.04   | -1.08  | -1.17  | -1.09  | <i>Sptbn2</i>                             | spectrin beta, non-erythrocytic 2                                                       | 0007416 // synapse assembly // inferred from mutant phenotype///0016079 // synaptic          |
| NM_130903    | ///XM    | 0.047  |       |       | -1.03  | -1.05  | -1.17  | -1.16  | <i>Cd209c</i>                             | CD209c antigen                                                                          |                                                                                              |
| NM_001252565 | ///      | 0.009  |       |       | 1.02   | -1.02  | -1.17  | -1.14  | <i>Oprl1</i>                              | opioid receptor-like 1                                                                  | 0001934 // positive regulation of protein phosphorylation // not recorded///0007165 // :     |
| NM_0118      | 0.0355   | 0.026  |       |       | 1.05   | -1.01  | -1.17  | -1.08  | <i>3-Sep</i>                              | septin 3                                                                                | 0007049 // cell cycle // inferred from electronic annotation///0051301 // cell division // i |
| NM_0254      | 0.0063   |        |       |       | 1.03   | -1.65  | -1.17  | -1.05  | <i>Rgcc</i>                               | regulator of cell cycle                                                                 | 0000082 // G1/S transition of mitotic cell cycle // not recorded///0001100 // negative reg   |
| NM_018795    | ///XM    | 0.019  | 0.01  |       | 1.09   | 1.02   | -1.17  | -1.20  | <i>Abcc6</i>                              | ATP-binding cassette, sub-family C (CFTR/MRP), member 6                                 | 0006810 // transport // inferred from electronic annotation///0008152 // metabolic pro       |
| NM_0083      | 0.0035   | 0.001  |       |       | 1.10   | -1.14  | -1.17  | -1.08  | <i>Htr2b</i>                              | 5-hydroxytryptamine (serotonin) receptor 2B                                             | 0001755 // neural crest cell migration // inferred from mutant phenotype///0001819 // t      |
| NM_139299    | ///XM    | 0.0651 | 0.001 |       | -1.02  | -1.07  | -1.17  | -1.29  | <i>Il31ra</i>                             | interleukin 31 receptor A                                                               | 0002067 // glandular epithelial cell differentiation // inferred from mutant phenotype///    |
| NM_0011      | 0.0369   |        |       |       | -1.00  | 1.18   | -1.17  | 1.07   | <i>Pparg</i>                              | peroxisome proliferator activated receptor gamma                                        | 0000122 // negative regulation of transcription from RNA polymerase II promoter // infer     |
| NM_010630    | ///XM    | 0.038  |       |       | 1.04   | -1.01  | -1.17  | -1.00  | <i>Kifc2</i>                              | kinesin family member C2                                                                | 0007018 // microtubule-based movement // not recorded///0008152 // metabolic proce           |
| NM_0074      | 0.0479   |        | 0.029 |       | 1.02   | -1.12  | -1.17  | -1.17  | <i>Aqp7</i>                               | aquaporin 7                                                                             | 0006810 // transport // inferred from electronic annotation///0006833 // water transpo       |
| NM_027983    |          |        | 0.002 |       | -1.03  | -1.01  | -1.17  | -1.29  | <i>Krt33a</i>                             | keratin 33A                                                                             |                                                                                              |
| NM_0079      | 0.0212   |        |       |       | 1.05   | -1.27  | -1.17  | 1.12   | <i>Ereg</i>                               | epiregulin                                                                              | 0000187 // activation of MAPK activity // not recorded///0001525 // angiogenesis // infe     |
| NM_0013      | 0.0348   |        |       |       | 1.02   | -1.15  | -1.17  | 1.20   | <i>Adamts14</i>                           | ADAMTS-like 4                                                                           | 0006508 // proteolysis // inferred from electronic annotation///0006915 // apoptotic pro     |
| NM_008340    | ///XM    | 0.028  |       |       | -1.00  | -1.03  | -1.17  | -1.14  | <i>Igfals</i>                             | insulin-like growth factor binding protein, acid labile subunit                         | 0007155 // cell adhesion // inferred from electronic annotation                              |
| NM_007699    | ///XM    | 0.0649 | 0.046 |       | -1.00  | -1.04  | -1.17  | -1.19  | <i>Chrm4</i>                              | cholinergic receptor, muscarinic 4                                                      | 0007165 // signal transduction // inferred from electronic annotation///0007186 // G-pr      |
| NM_001167691 | ///      | 0.04   |       |       | 1.03   | -1.03  | -1.17  | -1.09  | <i>Sirt4</i>                              | sirtuin 4                                                                               | 0000820 // regulation of glutamine family amino acid metabolic process // inferred fr        |
| NM_001310639 | ///      | 0.011  |       |       | 1.09   | 1.28   | -1.17  | -1.10  | <i>Stap1</i>                              | signal transducing adaptor family member 1                                              | 0007169 // transmembrane receptor protein tyrosine kinase signaling pathway // infere        |
| NM_010670    |          |        | 0.043 |       | 1.02   | 1.02   | -1.17  | -1.05  | <i>Krtap12-1</i>                          | keratin associated protein 12-1                                                         |                                                                                              |
| NM_011741    | ///XM    | 0.001  |       |       | -1.01  | -1.05  | -1.17  | -1.12  | <i>Zan</i>                                | zonadhesin                                                                              | 0007155 // cell adhesion // inferred from electronic annotation///0007339 // binding of :    |
| NM_0092      | 0.0358   |        |       |       | 1.10   | -1.08  | -1.17  | -1.17  | <i>Sts</i>                                | steroid sulfatase                                                                       | 0006629 // lipid metabolic process // inferred from electronic annotation///0007565 // f     |
| NM_0082      | 0.0012   |        |       |       | 1.09   | 1.65   | -1.17  | -1.01  | <i>Hhex</i>                               | hematopoietically expressed homeobox                                                    | 0000122 // negative regulation of transcription from RNA polymerase II promoter // infer     |
| NM_025987    |          | 0.035  |       |       | 1.05   | 1.01   | -1.17  | -1.09  | <i>Ndufa6</i>                             | NADH dehydrogenase (ubiquinone) 1 alpha subcomplex, 6 (B14)                             | 0006810 // transport // inferred from electronic annotation///0006979 // response to ox      |
| NM_1460      | 0.0166   |        |       |       | 1.05   | -1.21  | -1.17  | -1.01  | <i>Sec14l4</i>                            | SEC14-like lipid binding 4                                                              | 0006810 // transport // inferred from electronic annotation                                  |
| NM_0103      | 0.0415   |        |       |       | 1.06   | -1.07  | -1.17  | 1.18   | <i>Grb7</i>                               | growth factor receptor bound protein 7                                                  | 0007165 // signal transduction // traceable author statement///0009967 // positive regu      |
| NM_016863    | ///XM    | 0.011  |       |       | 1.09   | 1.02   | -1.17  | -1.15  | <i>Fkbp1b</i>                             | FK506 binding protein 1b                                                                | 0000413 // protein peptidyl-prolyl isomerization // not recorded///0002027 // regulatio      |
| NM_001039530 | ///      | 0.038  |       |       | 1.07   | 1.04   | -1.17  | 1.13   | <i>Parp14</i>                             | poly (ADP-ribose) polymerase family, member 14                                          | 0006351 // transcription, DNA-templated // inferred from electronic annotation///00063       |
| NM_0098      | 0.0413   | 0.014  |       |       | 1.02   | -1.12  | -1.17  | -1.16  | <i>Entpd2</i>                             | ectonucleoside triphosphate diphosphohydrolase 2                                        | 0007186 // G-protein coupled receptor signaling pathway // inferred from direct assay///     |
| NM_053122    |          | 0.02   |       |       | 1.08   | -1.01  | -1.17  | -1.09  | <i>Immp2l</i>                             | IMP2 inner mitochondrial membrane peptidase-like (S. cerevisiae)                        | 0001541 // ovarian follicle development // inferred from mutant phenotype///0006465 /        |
| NM_033037    | ///XR    | 0.033  |       |       | 1.11   | -1.00  | -1.17  | -1.04  | <i>Cdo1</i>                               | cysteine dioxygenase 1, cytosolic                                                       | 0007595 // lactation // not recorded///0010243 // response to organonitrogen compou          |
| NM_001002927 | ///      | 0.042  |       |       | 1.07   | -1.06  | -1.17  | -1.06  | <i>Penk</i>                               | preproenkephalin                                                                        | 0001662 // behavioral fear response // inferred from mutant phenotype///0001964 // st        |
| NM_013491    | ///XM    | 0.05   |       |       | 1.06   | -1.02  | -1.17  | -1.06  | <i>Clcn1</i>                              | chloride channel, voltage-sensitive 1                                                   | 0006810 // transport // inferred from electronic annotation///0006811 // ion transport /     |
|              |          | 0.0035 |       |       | -1.07  | 1.24   | -1.17  | -1.22  | <i>Igkv3-12</i> ///Igkv3-7                | immunoglobulin kappa variable 3-12///immunoglobulin kappa variable 3-7                  | 0006898 // receptor-mediated endocytosis // ---///0006910 // phagocytosis, recognition       |
| NM_0097      | 0.0197   | 0.004  |       |       | 1.10   | -1.15  | -1.17  | 1.05   | <i>Chic1</i>                              | cysteine-rich hydrophobic domain 1                                                      | 0006810 // transport // not recorded                                                         |
| NM_001252662 | ///      | 0.042  |       |       | 1.04   | 1.06   | -1.17  | -1.02  | <i>Dmtn</i>                               | dematin actin binding protein                                                           | 0006461 // protein complex assembly // inferred from direct assay///0006461 // protein       |
| NM_145377    | ///XM    | 0.01   |       |       | 1.04   | -1.06  | -1.17  | -1.03  | <i>Trim41</i>                             | tripartite motif-containing 41                                                          | 0016567 // protein ubiquitination // inferred from electronic annotation                     |
| NM_133191    | ///XM    | 0.037  |       |       | 1.03   | -1.00  | -1.17  | 1.12   | <i>Eps8l2</i>                             | EPS8-like 2                                                                             | 0007266 // Rho protein signal transduction // not recorded///0016601 // Rac protein sig      |
| NM_001310680 | ///      | 0.009  |       |       | 1.01   | -1.02  | -1.17  | -1.01  | <i>Scg2</i>                               | secretogranin II                                                                        | 0000165 // MAPK cascade // not recorded///0000165 // MAPK cascade // inferred from :         |
| NM_001199123 | ///      | 0.017  |       |       | -1.00  | -1.11  | -1.16  | -1.13  | <i>Spc25</i>                              | SPC25, NDC80 kinetochore complex component, homolog (S. cerevisiae)                     | 0007049 // cell cycle // inferred from electronic annotation///0007052 // mitotic spindle    |
| NM_0273      | 0.0471   |        |       |       | 1.02   | -1.24  | -1.16  | -1.08  | <i>lyd</i>                                | iodotyrosine deiodinase                                                                 | 0055114 // oxidation-reduction process // inferred from electronic annotation                |
| NM_001122949 | ///      | 0.01   |       |       | 1.02   | -1.03  | -1.16  | -1.09  | <i>Mpl</i>                                | myeloproliferative leukemia virus oncogene                                              | 0010628 // positive regulation of gene expression // inferred from mutant phenotype///       |
| NM_008824    | ///XM    | 0.034  |       |       | 1.04   | -1.04  | -1.16  | -1.04  | <i>Pfkfb1</i>                             | 6-phosphofructo-2-kinase/fructose-2,6-bisphosphatase 1                                  | 0006000 // fructose metabolic process // inferred from electronic annotation///0006003       |
| NM_1768      | 0.026    |        |       |       | -1.02  | -1.22  | -1.16  | 1.07   | <i>Osbpl11</i>                            | oxysterol binding protein-like 11                                                       | 0006810 // transport // inferred from electronic annotation///0006869 // lipid transport     |
| NM_0012      | 0.0073   |        |       |       | -1.14  | -1.44  | -1.16  | -1.16  | <i>Stf1</i>                               | suppression of tumorigenicity 7-like                                                    | 0030198 // extracellular matrix organization // non-traceable author statement///003030      |
| NM_1531      | 0.0392   |        |       |       | -1.01  | -1.30  | -1.16  | 1.20   | <i>Abca8a</i>                             | ATP-binding cassette, sub-family A (ABC1), member 8a                                    | 0006810 // transport // inferred from electronic annotation///0006869 // lipid transport     |
| NM_0269      | 0.0417   | 0.007  | 0.023 |       | 1.07   | -1.06  | -1.16  | -1.14  | <i>Zg16</i>                               | zymogran granule protein 16                                                             | 0006810 // transport // inferred from electronic annotation///0015031 // protein transp      |
| NM_031172    | ///XM    | 0.037  |       |       | 1.03   | 1.02   | -1.16  | -1.12  | <i>Trim17</i> ///Hist3h2a                 | tripartite motif-containing 17///histone cluster 3, H2a                                 | 0006914 // autophagy // not recorded///0016567 // protein ubiquitination // inferred fr      |
| NM_0012      | 0.0111   |        |       |       | -1.11  | 1.01   | -1.16  | -1.18  | <i>Dmc1</i>                               | DMC1 dosage suppressor of mck1 homolog, meiosis-specific homologous recombination       | 0000730 // DNA recombinase assembly // not recorded///0001541 // ovarian follicle dev        |
| NM_008154    |          | 0.028  |       |       | 1.04   | -1.04  | -1.16  | -1.12  | <i>Gpr3</i>                               | G-protein coupled receptor 3                                                            | 0007165 // signal transduction // inferred from electronic annotation///0007186 // G-pr      |
| NM_0011      | 0.0016   | #####  |       |       | 1.06   | -1.09  | -1.16  | -1.06  | <i>Kif17</i>                              | kinesin family member 17                                                                | 0006810 // transport // inferred from electronic annotation///0007017 // microtubule-b       |
| NM_021409    |          | 0.004  |       |       | 1.13   | 1.06   | -1.16  | 1.11   | <i>Pard6b</i>                             | par-6 family cell polarity regulator beta                                               | 0006461 // protein complex assembly // not recorded///0007049 // cell cycle // inferred      |
| NM_025347    | ///NM    | 0.008  |       |       | 1.14   | 1.16   | -1.16  | -1.07  | <i>Ypel3</i>                              | yippee-like 3 (Drosophila)                                                              | 0006915 // apoptotic process // inferred from electronic annotation///2000774 // positi      |
| NM_0010      | 0.0369   |        |       |       | 1.06   | -1.12  | -1.16  | -1.02  | <i>Rusc2</i>                              | RUN and SH3 domain containing 2                                                         |                                                                                              |

| RefSeq        | Tri           | p 24h | p 48h | p 72h | FD Air | FD 24h | FD 48h | FD 72h | Gene Symbol                            | Gene Title                                                                                                                                                  | Gene Ontology Biological Process                                                            |
|---------------|---------------|-------|-------|-------|--------|--------|--------|--------|----------------------------------------|-------------------------------------------------------------------------------------------------------------------------------------------------------------|---------------------------------------------------------------------------------------------|
| NM_026419     | ///XM         | 0.042 |       |       | -1.01  | -1.08  | -1.16  | -1.17  | <b>Cela3b</b>                          | chymotrypsin-like elastase family, member 3B                                                                                                                | 0006508 // proteolysis // not recorded///0008203 // cholesterol metabolic process // no     |
| NM_001290561  | ///           | 0.004 | 0.005 |       | 1.02   | -1.06  | -1.16  | -1.19  | <b>Plp1</b>                            | proteolipid protein (myelin) 1                                                                                                                              | 0006954 // inflammatory response // inferred from genetic interaction///0007229 // inte     |
| NM_001290680  | ///           | 0.045 | 0.005 |       | 1.09   | 1.08   | -1.16  | -1.11  | <b>Nsg2</b>                            | neuron specific gene family member 2                                                                                                                        | 0007212 // dopamine receptor signaling pathway // inferred from electronic annotation//     |
| XM_9773f      | 0.0345        |       |       |       | -1.04  | 1.32   | -1.16  | -1.17  | <b>Tcrb-J//LOC665506//Trbc1//Trbc2</b> | T cell receptor beta, joining region//T-cell receptor beta-2 chain C region-like//T cell receptor beta, constant region 1//T cell receptor beta, constant 2 |                                                                                             |
| NM_026818     |               | 0.03  | 0.035 |       | 1.12   | -1.05  | -1.16  | -1.14  | <b>Clp2</b>                            | cartilage intermediate layer protein 2                                                                                                                      |                                                                                             |
| NM_0194       | 0.0164        |       |       |       | 1.03   | -1.17  | -1.16  | 1.03   | <b>Hgfac</b>                           | hepatocyte growth factor activator                                                                                                                          | 0006508 // proteolysis // inferred from electronic annotation                               |
| NM_1733f      | 0.0086        |       |       |       | -1.11  | 1.05   | -1.16  | -1.17  | <b>Xkr6</b>                            | X Kell blood group precursor related family member 6 homolog                                                                                                |                                                                                             |
| NM_0218       | 0.0077        |       | 0.025 |       | -1.06  | -1.44  | -1.16  | 1.09   | <b>Tmod1</b>                           | tropomodulin 1                                                                                                                                              | 0006936 // muscle contraction // inferred from mutant phenotype///0007015 // actin fil.     |
| NM_001165934  | ///           | 0.039 |       |       | -1.02  | -1.13  | -1.16  | -1.12  | <b>Rgs9</b>                            | regulator of G-protein signaling 9                                                                                                                          | 0007186 // G-protein coupled receptor signaling pathway // traceable author statement//     |
| NM_0080       | 0.0074        |       |       |       | 1.11   | -1.53  | -1.16  | 1.39   | <b>Fmo3</b>                            | flavin containing monooxygenase 3                                                                                                                           | 0017144 // drug metabolic process // not recorded///0055114 // oxidation-reduction prc      |
| NM_0011       | 0.011         |       |       |       | 1.01   | -1.22  | -1.16  | -1.08  | <b>Smyd1</b>                           | SET and MYND domain containing 1                                                                                                                            | 0006338 // chromatin remodeling // inferred from physical interaction///0006351 // trar     |
| NM_0134       | 0.0496        |       |       |       | -1.15  | 1.12   | -1.16  | -1.23  | <b>Cd3d</b>                            | CD3 antigen, delta polypeptide                                                                                                                              | 0006461 // protein complex assembly // non-traceable author statement///0007166 // c        |
| NM_0100       | 0.0421        |       |       |       | 1.03   | -1.30  | -1.15  | -1.08  | <b>Cyp2b9</b>                          | cytochrome P450, family 2, subfamily b, polypeptide 9                                                                                                       | 0006805 // xenobiotic metabolic process // not recorded///0019373 // epoxygenase P45        |
| NM_0292       | 0.0127        |       |       |       | 1.01   | -1.14  | -1.15  | -1.13  | <b>Spp2</b>                            | secreted phosphoprotein 2                                                                                                                                   | 0006461 // protein complex assembly // not recorded///0046849 // bone remodeling // i       |
| NM_1454       | 0.0146        | 0.005 | 0.025 |       | 1.08   | -1.06  | -1.15  | -1.07  | <b>Csdc2</b>                           | cold shock domain containing C2, RNA binding                                                                                                                | 0006355 // regulation of transcription, DNA-templated // inferred from electronic annota    |
| NM_0166       | 0.0148        | 0.021 |       |       | 1.18   | -1.26  | -1.15  | 1.07   | <b>Reck</b>                            | reversion-inducing-cysteine-rich protein with kazal motifs                                                                                                  | 0001955 // blood vessel maturation // inferred from genetic interaction///0001955 // blk    |
| XR_105122     | ///XR_107916  |       | 0.006 |       | 1.02   | -1.02  | -1.15  | -1.22  | <b>Gm9885</b>                          | predicted gene 9885                                                                                                                                         |                                                                                             |
| NM_0214       | 0.0035        |       |       |       | 1.02   | -1.09  | -1.15  | -1.11  | <b>Mlxipl</b>                          | MLX interacting protein-like                                                                                                                                | 0000122 // negative regulation of transcription from RNA polymerase II promoter // infer    |
| NM_021879     | ///XM         | 0.011 |       |       | 1.08   | -1.02  | -1.15  | -1.09  | <b>Oca2</b>                            | oculocutaneous albinism II                                                                                                                                  | 0006810 // transport // inferred from electronic annotation///0007286 // spermatid dev      |
| NM_0167       | 0.0155        | 0.01  |       |       | 1.07   | -1.18  | -1.15  | -1.01  | <b>Pgrmc1</b>                          | progesterone receptor membrane component 1                                                                                                                  | 0007411 // axon guidance // inferred from electronic annotation                             |
| NM_0277f      | 0.0212        |       |       |       | -1.00  | -1.26  | -1.15  | 1.10   | <b>Nipbl</b>                           | Nipped-B homolog (Drosophila)                                                                                                                               | 0000122 // negative regulation of transcription from RNA polymerase II promoter // not i    |
| NM_001163486  | ///           | 0.034 |       |       | 1.00   | -1.04  | -1.15  | -1.19  | <b>Hsd17b13</b>                        | hydroxysteroid (17-beta) dehydrogenase 13                                                                                                                   | 0008152 // metabolic process // inferred from electronic annotation///0046889 // posit      |
| XR_871929     | ///XR_871929  | 0.013 |       |       | 1.07   | -1.03  | -1.15  | 1.04   | <b>Igf1os</b>                          | insulin-like growth factor 1, opposite strand                                                                                                               |                                                                                             |
| NM_016695f    | ///XM         | 0.015 | 0.022 |       | 1.07   | 1.02   | -1.15  | -1.13  | <b>Mpp2</b>                            | membrane protein, palmitoylated 2 (MAGUK p55 subfamily member 2)                                                                                            |                                                                                             |
| NM_008212     | 0.045         |       |       |       | 1.06   | 1.04   | -1.15  | 1.14   | <b>Hadh</b>                            | hydroxyacyl-Coenzyme A dehydrogenase                                                                                                                        | 0006629 // lipid metabolic process // inferred from electronic annotation///0006631 // f.   |
| NM_001010941  | ///           | 0.047 | 0.027 |       | 1.01   | -1.02  | -1.15  | -1.15  | <b>Gpr12</b>                           | G-protein coupled receptor 12                                                                                                                               | 0006874 // cellular calcium ion homeostasis // inferred from direct assay///0007165 // si   |
| NR_02826      | 0.0457        |       |       |       | 1.02   | -1.33  | -1.15  | -1.22  | <b>Dleu2</b>                           | deleted in lymphocytic leukemia, 2                                                                                                                          | 0010977 // negative regulation of neuron projection development // inferred from geneti     |
| NM_027918f    | ///XM_006511  | 0.039 |       |       | 1.00   | 1.07   | -1.15  | -1.19  | <b>1300017J02Rik</b>                   | RIKEN cDNA 1300017J02 gene                                                                                                                                  | 0043086 // negative regulation of catalytic activity // inferred from electronic annotation |
| NM_0076       | 0.0063        |       |       |       | 1.00   | -1.30  | -1.15  | -1.14  | <b>Serpina6</b>                        | serine (or cysteine) peptidase inhibitor, clade A, member 6                                                                                                 | 0006810 // transport // inferred from electronic annotation///0008211 // glucocorticoid     |
| NM_011455f    | ///NM         | 0.043 |       |       | 1.05   | -1.02  | -1.15  | -1.01  | <b>Serpina9e//Serpina9f//Serpina9g</b> | predicted gene 11397//serine (or cysteine) peptidase inhibitor, clade B, member 9e//                                                                        | 0002244 // hematopoietic progenitor cell differentiation // inferred from mutant phenot     |
| NM_182805     | 0.03          |       |       |       | 1.14   | 1.02   | -1.15  | 1.02   | <b>Gpt</b>                             | glutamic pyruvic transaminase, soluble                                                                                                                      | 0009058 // biosynthetic process // inferred from electronic annotation///0042853 // L-al    |
| NM_0100f      | 0.0297        | 0.016 |       |       | 1.07   | -1.09  | -1.15  | -1.04  | <b>Cyp2c38</b>                         | cytochrome P450, family 2, subfamily c, polypeptide 38                                                                                                      | 0006805 // xenobiotic metabolic process // not recorded///0019373 // epoxygenase P45        |
| NM_001128605f | ///           | 0.04  |       |       | -1.04  | -1.00  | -1.15  | -1.03  | <b>Psen2</b>                           | presenilin 2                                                                                                                                                | 0000122 // negative regulation of transcription from RNA polymerase II promoter // infer    |
| NM_001037098f | ///NM_02f     | 0.003 |       |       | -1.05  | -1.20  | -1.15  | 1.11   | <b>Nacc2</b>                           | nucleus accumbens associated 2, BEN and BTB (POZ) domain containing                                                                                         | 0008285 // negative regulation of cell proliferation // not recorded///0010608 // posttra   |
| NM_027790f    | ///XM         | 0.014 |       |       | 1.05   | -1.01  | -1.15  | -1.12  | <b>Dhrs2</b>                           | dehydrogenase/reductase member 2                                                                                                                            | 0008152 // metabolic process // inferred from electronic annotation///0009636 // respo      |
| NM_0307       | 0.0419        |       |       |       | -1.12  | 1.02   | -1.15  | -1.19  | <b>Cxcr6</b>                           | chemokine (C-X-C motif) receptor 6                                                                                                                          | 0006935 // chemotaxis // inferred from electronic annotation///0006954 // inflammator       |
| NM_0112       | 0.0458        | 0.024 |       |       | 1.03   | -1.09  | -1.15  | -1.12  | <b>Pvt1</b>                            | plasmacytoma variant translocation 1                                                                                                                        |                                                                                             |
| NM_001110337f | ///           | 0.011 |       |       | 1.06   | -1.10  | -1.15  | 1.01   | <b>Gprc5c</b>                          | G protein-coupled receptor, family C, group 5, member C                                                                                                     | 0007165 // signal transduction // inferred from electronic annotation///0007186 // G-pr     |
| NM_0012       | 0.014         | 0.012 | 0.035 |       | 1.01   | -1.08  | -1.15  | -1.17  | <b>Kcnma1</b>                          | potassium large conductance calcium-activated channel, subfamily M, alpha member                                                                            | 0001666 // response to hypoxia // inferred from direct assay///0001666 // response to h     |
| NM_0012       | 0.0263        | 0.043 |       |       | 1.10   | -1.08  | -1.15  | 1.02   | <b>Ttc28</b>                           | tetratricopeptide repeat domain 28                                                                                                                          | 0007049 // cell cycle // inferred from electronic annotation///0007067 // mitotic nuclear   |
| NM_013697     |               | 0.033 |       |       | -1.32  | -1.05  | -1.15  | -1.08  | <b>Ttr</b>                             | transthyretin                                                                                                                                               | 0006810 // transport // inferred from electronic annotation///0042572 // retinol metab      |
| NM_009766f    | ///XM         | 0.038 |       |       | 1.06   | -1.01  | -1.15  | -1.08  | <b>Brs3</b>                            | bombesin-like receptor 3                                                                                                                                    | 0007165 // signal transduction // inferred from electronic annotation///0007186 // G-pr     |
|               |               | 0.018 | 0.019 |       | -1.00  | -1.04  | -1.15  | -1.28  | <b>Gm8479</b>                          | thiopurine S-methyltransferase pseudogene                                                                                                                   |                                                                                             |
| NM_019510f    | ///XM         | 0.016 |       |       | 1.09   | 1.09   | -1.15  | 1.01   | <b>Trpc3</b>                           | transient receptor potential cation channel, subfamily C, member 3                                                                                          | 0006810 // transport // inferred from electronic annotation///0006811 // ion transport /    |
| NM_001083929f | ///NM_00f     | 0.02  |       |       | -1.08  | -1.12  | -1.15  | 1.15   | <b>Gpx3</b>                            | glutathione peroxidase 3                                                                                                                                    | 0006749 // glutathione metabolic process // not recorded///0006979 // response to oxid      |
| NM_001286396f | ///           | 0.01  |       |       | 1.05   | 1.12   | -1.15  | -1.08  | <b>Dao</b>                             | D-amino acid oxidase                                                                                                                                        | 0006551 // leucine metabolic process // inferred from mutant phenotype///0006562 // c       |
| NM_1784       | 0.0157        |       |       |       | -1.05  | 1.35   | -1.15  | -1.19  | <b>Myo1g</b>                           | myosin IG                                                                                                                                                   | 0002376 // adaptive immune response // inferred from electronic annotation///0002376        |
| NM_1707       | 0.0381        |       |       |       | -1.02  | 1.28   | -1.14  | 1.01   | <b>Cd300a</b>                          | CD300A antigen                                                                                                                                              | 0002376 // immune system process // inferred from electronic annotation///0002552 //        |
| NM_0212       | 0.0283        |       |       |       | 1.02   | -1.15  | -1.14  | -1.18  | <b>Wnt1</b>                            | wingless-type MMTV integration site family, member 1                                                                                                        | 0000578 // embryonic axis specification // inferred from mutant phenotype///0001658 //      |
| NM_080729f    | ///XM_006511f | 0.036 |       |       | -1.15  | -1.01  | -1.14  | -1.02  | <b>Il25</b>                            | interleukin 25                                                                                                                                              | 0002437 // inflammatory response to antigenic stimulus // not recorded///0006954 // in      |
| NM_0271       | 0.0093        | 0.041 |       |       | 1.07   | -1.12  | -1.14  | 1.15   | <b>Arhgef12</b>                        | Rho guanine nucleotide exchange factor (GEF) 12                                                                                                             | 0007186 // G-protein coupled receptor signaling pathway // not recorded///0035023 // r      |
| NM_001142732f | ///           | 0.005 |       |       | 1.11   | -1.03  | -1.14  | -1.07  | <b>Ttl3</b>                            | tubulin tyrosine ligase-like family, member 3                                                                                                               | 0006464 // cellular protein modification process // inferred from electronic annotation//   |
| NM_0085       | 0.0393        |       |       |       | 1.15   | 1.88   | -1.14  | -1.46  | <b>Ltb</b>                             | lymphotoxin B                                                                                                                                               | 0006955 // immune response // inferred from electronic annotation///0010467 // gene e       |
| NM_028621     | 0.008         |       |       |       | -1.00  | -1.06  | -1.14  | -1.02  | <b>Krtap21-1</b>                       | keratin associated protein 21-1                                                                                                                             | 0001942 // hair follicle development // inferred from mutant phenotype///0007165 // si      |
| NM_053227f    | ///XM         | 0.021 | 0.031 |       | -1.01  | -1.11  | -1.14  | -1.14  | <b>Vmn1r44</b>                         | vomeronal 1 receptor 44                                                                                                                                     | 0007165 // signal transduction // inferred from electronic annotation///0007186 // G-pr     |
| NM_0108       | 0.0276        |       | 0.044 |       | -1.17  | 1.00   | -1.14  | -1.09  | <b>Myoc</b>                            | myocilin                                                                                                                                                    | 0001649 // osteoblast differentiation // inferred from direct assay///0001649 // osteobla   |
| NM_0276       | 0.0176        |       |       |       | 1.06   | -1.13  | -1.14  | -1.08  | <b>Speer3</b>                          | spermatogenesis associated glutamate (E)-rich protein 3                                                                                                     |                                                                                             |
| NM_020277f    | ///XM         | 0.037 |       |       | 1.03   | -1.03  | -1.14  | -1.20  | <b>Trpm5</b>                           | transient receptor potential cation channel, subfamily M, member 5                                                                                          | 0006810 // transport // inferred from electronic annotation///0006811 // ion transport /    |
| NM_053221     | 0.032         | 0.041 |       |       | 1.15   | -1.03  | -1.14  | -1.10  | <b>Vmn1r42</b>                         | vomeronal 1 receptor 42                                                                                                                                     | 0007165 // signal transduction // inferred from electronic annotation///0007186 // G-pr     |
| NM_001111015f | ///           | 0.008 | 0.007 |       | 1.07   | -1.04  | -1.14  | -1.13  | <b>Syn2</b>                            | synapsin II                                                                                                                                                 | 0007269 // neurotransmitter secretion // inferred from genetic interaction///0007269 //     |
| NM_0013f      | 0.0289        |       |       |       | -1.17  | 1.05   | -1.14  | -1.16  | <b>Ggt1</b>                            | gamma-glutamyltransferase 1                                                                                                                                 | 0002682 // regulation of immune system process // inferred from mutant phenotype//0         |
| NM_023907     | 0.017         |       |       |       | 1.06   | -1.07  | -1.14  | -1.10  | <b>Foxi1</b>                           | forkhead box I1                                                                                                                                             | 0006351 // transcription, DNA-templated // inferred from electronic annotation///00063      |
| NM_0096f      | 0.0345        |       |       |       | -1.12  | 1.08   | -1.14  | -1.13  | <b>Apob</b>                            | apolipoprotein B                                                                                                                                            | 0001701 // in utero embryonic development // inferred from mutant phenotype///0006f         |
| NM_001007570  | 0.012         |       |       |       | 1.03   | 1.03   | -1.14  | -1.07  | <b>Slc25a42</b>                        | solute carrier family 25, member 42                                                                                                                         | 0006810 // transport // inferred from electronic annotation///0008152 // metabolic pro      |

| RefSeq               | Tri   | p 24h  | p 48h | p 72h | FD Air | FD 24h | FD 48h | FD 72h | Gene Symbol                      | Gene Title                                                                                  | Gene Ontology Biological Process                                                            |
|----------------------|-------|--------|-------|-------|--------|--------|--------|--------|----------------------------------|---------------------------------------------------------------------------------------------|---------------------------------------------------------------------------------------------|
| NM_027220            |       | 0.022  |       |       | 1.04   | -1.05  | -1.14  | -1.12  | <i>Prss32</i>                    | protease, serine 32                                                                         | 0006508 // proteolysis // inferred by curator                                               |
| NM_008814            |       | 0.034  |       |       | 1.00   | -1.08  | -1.14  | -1.15  | <i>Pdx1</i>                      | pancreatic and duodenal homeobox 1                                                          | 0000122 // negative regulation of transcription from RNA polymerase II promoter // infer    |
| NM_175309            |       | 0.016  |       |       | 1.20   | 1.05   | -1.14  | 1.18   | <i>Upk3b</i>                     | uroplakin 3B                                                                                | 0010629 // negative regulation of gene expression // not recorded//0046325 // negativ       |
| NM_001313956//       |       | 0.038  |       |       | 1.01   | -1.05  | -1.14  | -1.04  | <i>Krt14//Krt17</i>              | keratin 14//keratin 17                                                                      | 0002009 // morphogenesis of an epithelium // inferred from genetic interaction//00071       |
| NM_001037930//       |       | 0.013  |       |       | 1.01   | -1.04  | -1.14  | -1.10  | <i>Gm6787</i>                    | proteasome (prosome, macropain) subunit, beta type 7 pseudogene                             |                                                                                             |
| NM_0012              |       | 0.0222 |       | 0.005 | 1.13   | -1.20  | -1.14  | 1.03   | <i>Polr3gl</i>                   | polymerase (RNA) III (DNA directed) polypeptide G like                                      | 0006359 // regulation of transcription from RNA polymerase III promoter // inferred from    |
| NM_008936            |       |        | 0.03  |       | 1.04   | -1.17  | -1.14  | -1.15  | <i>Prop1</i>                     | paired like homeodomain factor 1                                                            | 0000122 // negative regulation of transcription from RNA polymerase II promoter // infer    |
| NM_0136              |       | 0.0183 |       |       | -1.05  | 1.11   | -1.14  | -1.12  | <i>Irf4</i>                      | interferon regulatory factor 4                                                              | 0006351 // transcription, DNA-templated // inferred from electronic annotation//00063       |
| NM_007771//XM_01124: |       |        | 0.02  |       | -1.45  | -1.22  | -1.14  | 1.00   | <i>Cry1</i>                      | cryptochrome 1 (photolyase-like)                                                            | 0000122 // negative regulation of transcription from RNA polymerase II promoter // infer    |
| NM_0197              |       | 0.0163 |       | 0.009 | 1.10   | -1.18  | -1.14  | -1.16  | <i>Tmeff2</i>                    | transmembrane protein with EGF-like and two follistatin-like domains 2                      |                                                                                             |
| NM_0010              | ##### |        |       |       | -1.02  | -1.24  | -1.14  | -1.10  | <i>Limch1</i>                    | LIM and calponin homology domains 1                                                         | 0031032 // actomyosin structure organization // inferred from electronic annotation         |
| NM_0214              |       | 0.0107 |       | 0.044 | 1.10   | -1.07  | -1.14  | 1.01   | <i>Mknk2</i>                     | MAP kinase-interacting serine/threonine kinase 2                                            | 0006417 // regulation of translation // inferred from electronic annotation//0006468 //     |
| NM_009937//NM        |       | 0.027  |       | 0.022 | 1.07   | -1.04  | -1.14  | -1.15  | <i>Colq//Hacl1//LOC102639719</i> | collagen-like tail subunit (single strand of homotrimer) of asymmetric acetylcholinesterase | 0001561 // fatty acid alpha-oxidation // not recorded//0006629 // lipid metabolic proce     |
| NM_026335            |       |        |       | 0.005 | 1.04   | -1.03  | -1.14  | -1.12  | <i>Lce1h</i>                     | late cornified envelope 1H                                                                  | 0008544 // epidermis development // inferred from electronic annotation//0018149 //         |
| NM_0540              |       | 0.0162 |       |       | 1.14   | -1.16  | -1.14  | -1.04  | <i>Psg28</i>                     | pregnancy-specific glycoprotein 28                                                          | 0007565 // female pregnancy // inferred from electronic annotation                          |
| NM_015730//XM        |       | 0.014  |       |       | 1.00   | 1.00   | -1.14  | -1.14  | <i>Chrna4</i>                    | cholinergic receptor, nicotinic, alpha polypeptide 4                                        | 0001508 // action potential // inferred from mutant phenotype//0001666 // response to       |
| NM_176987//XM        |       | 0.029  |       |       | 1.07   | 1.05   | -1.14  | -1.07  | <i>Simc1</i>                     | SUMO-interacting motifs containing 1                                                        |                                                                                             |
| NM_009510            |       | 0.017  |       |       | 1.06   | -1.01  | -1.14  | 1.03   | <i>Ezr</i>                       | euzrin                                                                                      | 0000122 // negative regulation of transcription from RNA polymerase II promoter // not r    |
| NM_0107              |       | 0.0479 |       |       | -1.07  | 1.01   | -1.14  | -1.10  | <i>Mcpt4</i>                     | mast cell protease 4                                                                        | 0002002 // regulation of angiotensin levels in blood // inferred from genetic interaction// |
| NM_001291280//NM_02: |       |        | 0.012 |       | 1.01   | -1.01  | -1.13  | -1.15  | <i>Nmb</i>                       | neuromedin B                                                                                | 0007204 // positive regulation of cytosolic calcium ion concentration // not recorded//0    |
| NM_0213              |       | 0.0147 |       | 0.042 | 1.09   | -1.13  | -1.13  | -1.02  | <i>Pappa</i>                     | pregnancy-associated plasma protein A                                                       | 0006508 // proteolysis // inferred from electronic annotation//0030154 // cell differenti   |
| NM_0011              |       | 0.0267 |       | 0.018 | 1.05   | -1.11  | -1.13  | 1.12   | <i>Fmo5</i>                      | flavin containing monooxygenase 5                                                           | 0017144 // drug metabolic process // not recorded//0055114 // oxidation-reduction prc       |
| NM_001081025//       |       | 0.031  |       |       | 1.09   | -1.11  | -1.13  | -1.01  | <i>Maats1</i>                    | MYCBP-associated, testis expressed 1                                                        |                                                                                             |
| NM_0010              |       | 0.0354 |       |       | 1.01   | 1.24   | -1.13  | 1.14   | <i>Hmga1//Hmga1-rs1</i>          | high mobility group AT-hook 1//high mobility group AT-hook 1, related sequence 1            | 0006284 // base-excision repair // not recorded//0006351 // transcription, DNA-templa       |
| NM_0011718//XM       |       | 0.007  |       | 0.028 | 1.11   | 1.04   | -1.13  | -1.13  | <i>Wnt10b</i>                    | wingless-type MMTV integration site family, member 10B                                      | 0000086 // G2/M transition of mitotic cell cycle // inferred from genetic interaction//00   |
| NM_0095              |       | 0.0048 |       | 0.016 | 1.07   | -1.21  | -1.13  | 1.06   | <i>Abcg1</i>                     | ATP-binding cassette, sub-family G (WHITE), member 1                                        | 0006355 // regulation of transcription, DNA-templated // inferred from mutant phenoty       |
| NM_0088              |       | 0.0468 |       |       | -1.02  | -1.20  | -1.13  | 1.08   | <i>Pkd2</i>                      | polycystic kidney disease 2                                                                 | 0001658 // branching involved in ureteric bud morphogenesis // inferred from electronic     |
| NM_1530              |       | 0.0118 |       | 0.029 | 1.05   | -1.11  | -1.13  | -1.05  | <i>Slc18a1</i>                   | solute carrier family 18 (vesicular monoamine), member 1                                    | 0006810 // transport // inferred from electronic annotation//0006836 // neurotransmit       |
| NM_001289468//       |       | 0.01   |       |       | 1.04   | 1.02   | -1.13  | -1.05  | <i>Tcl1</i>                      | T cell lymphoma breakpoint 1                                                                | 0010629 // negative regulation of gene expression // inferred from mutant phenotype//       |
| NM_0089              |       | 0.0124 |       |       | 1.04   | -1.16  | -1.13  | -1.15  | <i>Prop1</i>                     | paired like homeodomain factor 1                                                            | 0000122 // negative regulation of transcription from RNA polymerase II promoter // infer    |
| NM_0094              |       | 0.0302 |       | 0.022 | 1.11   | -1.09  | -1.13  | -1.14  | <i>Trh</i>                       | thyrotropin releasing hormone                                                               | 0001666 // response to hypoxia // inferred from electronic annotation//0001692 // hist      |
| NM_008764            |       | 0.019  |       |       | 1.05   | 1.03   | -1.13  | -1.05  | <i>Tnfrsf11b</i>                 | tumor necrosis factor receptor superfamily, member 11b (osteoprotegerin)                    | 0006915 // apoptotic process // inferred from electronic annotation//0006954 // inflam      |
| NM_008262            |       |        | 0.022 |       | -1.03  | 1.10   | -1.13  | -1.24  | <i>Onecut1</i>                   | one cut domain, family member 1                                                             | 0001889 // liver development // inferred from genetic interaction//0001952 // regulati      |
| NM_0011              |       | 0.001  |       | 0.028 | 1.05   | -1.09  | -1.13  | -1.05  | <i>Ralbp1</i>                    | ralA binding protein 1                                                                      | 0006810 // transport // not recorded//0006897 // endocytosis // not recorded//00070         |
| NM_001048139//       |       | 0.005  |       | 0.033 | 1.18   | 1.06   | -1.13  | -1.05  | <i>Bdnf</i>                      | brain derived neurotrophic factor                                                           | 0001657 // ureteric bud development // inferred from direct assay//0001662 // behavi        |
| NM_009710//XM        |       | 0.045  |       |       | -1.01  | -1.00  | -1.13  | -1.11  | <i>Art1</i>                      | ADP-ribosyltransferase 1                                                                    | 0006471 // protein ADP-ribosylation // inferred from direct assay                           |
| NM_0135              |       | 0.0117 |       |       | 1.03   | 1.31   | -1.13  | -1.16  | <i>Itgb7</i>                     | integrin beta 7                                                                             | 0003366 // cell-matrix adhesion involved in ameoboidal cell migration // not recorded//0    |
| NM_0010              |       | 0.0147 |       |       | -1.20  | 1.04   | -1.13  | -1.13  | <i>Dnah1</i>                     | dynein, axonemal, heavy chain 1                                                             | 0003341 // cilium movement // inferred from electronic annotation//0003354 // epithe        |
| NM_013803//XM        |       | 0.043  |       |       | 1.06   | -1.08  | -1.13  | -1.06  | <i>Casr</i>                      | calcium-sensing receptor                                                                    | 0001503 // ossification // not recorded//0006816 // calcium ion transport // not record     |
| NM_030259            |       | 0.047  |       |       | -1.01  | -1.02  | -1.13  | -1.09  | <i>Rilpl2</i>                    | Rab interacting lysosomal protein-like 2                                                    | 0003382 // epithelial cell morphogenesis // inferred from mutant phenotype//0006810         |
| NM_0011              |       | 0.0026 |       | 0.032 | 1.04   | -1.04  | -1.13  | 1.01   | <i>Hopx</i>                      | HOP homeobox                                                                                | 0000122 // negative regulation of transcription from RNA polymerase II promoter // infer    |
| NM_026447//NM        |       | 0.024  |       |       | 1.04   | 1.09   | -1.13  | -1.08  | <i>Ppm1m</i>                     | protein phosphatase 1M                                                                      | 0006470 // protein dephosphorylation // inferred from direct assay                          |
| NM_001110780//       |       | 0.029  |       |       | 1.01   | -1.11  | -1.13  | -1.09  | <i>Syn1</i>                      | synapsin I                                                                                  | 0007269 // neurotransmitter secretion // inferred from genetic interaction//0007269 //      |
| NM_0118              |       | 0.026  |       |       | 1.02   | -1.15  | -1.13  | -1.04  | <i>Aadat</i>                     | aminoadipate aminotransferase                                                               | 0006103 // 2-oxoglutarate metabolic process // not recorded//0006536 // glutamate m         |
| NM_0010              |       | 0.0467 |       |       | 1.09   | -1.00  | -1.13  | 1.13   | <i>Atxn7f3</i>                   | ataxin 7-like 3                                                                             | 0006351 // transcription, DNA-templated // inferred from electronic annotation//00063       |
| NM_028176//XM_00653: |       |        | 0.023 |       | -1.21  | -1.04  | -1.13  | 1.03   | <i>Cda</i>                       | cytidine deaminase                                                                          | 0009972 // cytidine deamination // not recorded//0030308 // negative regulation of cel      |
| NM_0107              |       | 0.0188 |       |       | -1.02  | 1.27   | -1.13  | -1.09  | <i>Lst1</i>                      | leukocyte specific transcript 1                                                             | 0000902 // cell morphogenesis // inferred from electronic annotation//0002376 // imm        |
| NM_0013              |       | 0.0398 |       |       | 1.01   | -1.20  | -1.13  | -1.14  | <i>Slc16a4</i>                   | solute carrier family 16 (monocarboxylic acid transporters), member 4                       | 0006810 // transport // inferred from electronic annotation//0015718 // monocarboxyl        |
| NM_0136              |       | 0.0447 |       |       | 1.14   | -1.35  | -1.13  | -1.02  | <i>Mt1</i>                       | metallothionein 1                                                                           | 0000032 // cell wall mannoprotein biosynthetic process // ---//0006486 // protein glyco     |
| NM_130860//XM        |       | 0.037  |       |       | 1.09   | 1.10   | -1.13  | -1.08  | <i>Cdk9</i>                      | cyclin-dependent kinase 9 (CDC2-related kinase)                                             | 0006281 // DNA repair // inferred from electronic annotation//0006282 // regulation of      |
| NM_001291149//       |       | 0.044  |       | 0.034 | 1.07   | -1.06  | -1.13  | -1.14  | <i>Ptprt</i>                     | protein tyrosine phosphatase, receptor type, T                                              | 0006470 // protein dephosphorylation // inferred from direct assay//0006470 // protei       |
| NM_1454              |       | 0.0191 |       |       | -1.09  | 1.06   | -1.13  | -1.14  | <i>Cd300ld</i>                   | CD300 molecule-like family member d                                                         | 0002376 // immune system process // inferred from electronic annotation//0032675 //         |
| NM_010645            |       |        | 0.003 |       | 1.05   | -1.13  | -1.13  | -1.21  | <i>Klk1b1</i>                    | kallikrein 1-related peptidase b1                                                           | 0002255 // tissue kallikrein-kinin cascade // inferred from mutant phenotype//0002936       |
| NM_0010              |       | 0.0278 |       |       | -1.04  | 1.07   | -1.13  | -1.06  | <i>Fmn1</i>                      | formin-like 1                                                                               | 0006929 // substrate-dependent cell migration // inferred from mutant phenotype//000        |
| NM_008530//XM        |       | 0.028  |       |       | 1.01   | -1.20  | -1.13  | 1.03   | <i>Ly6f</i>                      | lymphocyte antigen 6 complex, locus F                                                       | 0006461 // protein complex assembly // not recorded//0006811 // ion transport // not r      |
| NM_0012              |       | 0.0225 |       |       | -1.07  | 1.03   | -1.13  | -1.19  | <i>Add2</i>                      | adducin 2 (beta)                                                                            | 0030433 // ER-associated ubiquitin-dependent protein catabolic process // not recorded      |
| NM_0224              |       | 0.011  |       |       | -1.08  | 1.02   | -1.13  | -1.03  | <i>Tmub1</i>                     | transmembrane and ubiquitin-like domain containing 1                                        | 0006805 // xenobiotic metabolic process // not recorded//0019373 // epoxygenase P45         |
| NM_0287              |       | 0.0427 |       |       | 1.03   | -1.14  | -1.13  | 1.09   | <i>Cyp2s1</i>                    | cytochrome P450, family 2, subfamily 5, polypeptide 1                                       | 0006805 // proteolysis // inferred from electronic annotation                               |
| NM_013906            |       |        | ##### |       | -1.11  | -1.15  | -1.13  | 1.12   | <i>Adams28</i>                   | a disintegrin-like and metallopeptidase (reprolysin type) with thrombospondin type 1 r      | 0007288 // sperm axoneme assembly // inferred from mutant phenotype//0021591 // v           |
| NM_0157              |       | 0.0352 |       |       | 1.03   | -1.23  | -1.13  | -1.05  | <i>Spag6</i>                     | sperm associated antigen 6                                                                  | 0007165 // signal transduction // inferred from electronic annotation//0007186 // G-pr      |
| NM_013533//XM_00650: |       | 0.023  |       |       | 1.01   | 1.04   | -1.13  | -1.17  | <i>Gpr162</i>                    | G protein-coupled receptor 162                                                              | 0000387 // spliceosomal snRNP assembly // not recorded//0000398 // mRNA splicing, v         |
| NM_0168              |       | 0.0401 |       |       | -1.12  | 1.04   | -1.13  | -1.15  | <i>Sart1</i>                     | squamous cell carcinoma antigen recognized by T cells 1                                     | 0001967 // suckling behavior // inferred from mutant phenotype//0003360 // brainsten        |
| NM_001136056//NM_00  |       | 0.027  |       |       | 1.03   | -1.06  | -1.13  | -1.16  | <i>Cntfr</i>                     | ciliary neurotrophic factor receptor                                                        |                                                                                             |
| NM_133359            |       |        | 0.043 |       | 1.01   | -1.04  | -1.13  | -1.20  | <i>Krtap19-9b</i>                | keratin associated protein 19-9B                                                            |                                                                                             |



| RefSeq       | Tri         | p 24h  | p 48h | p 72h | FD Air | FD 24h | FD 48h | FD 72h | Gene Symbol                                 | Gene Title                                                                             | Gene Ontology Biological Process                                                           |
|--------------|-------------|--------|-------|-------|--------|--------|--------|--------|---------------------------------------------|----------------------------------------------------------------------------------------|--------------------------------------------------------------------------------------------|
| NM_0118      |             | 0.0365 |       |       | -1.06  | 1.10   | -1.13  | -1.13  | <i>Hcst</i>                                 | hematopoietic cell signal transducer                                                   | 0006468 // protein phosphorylation // not recorded//0014068 // positive regulation of      |
| NM_007818    |             |        | 0.039 |       | -1.44  | -1.14  | -1.13  | -1.16  | <i>Cyp3a11</i>                              | cytochrome P450, family 3, subfamily a, polypeptide 11                                 | 0055114 // oxidation-reduction process // inferred from electronic annotation              |
| NM_0242      |             | 0.0382 |       |       | -1.24  | -1.33  | -1.12  | -1.34  | <i>Mxra8</i>                                | matrix-remodelling associated 8                                                        | 0060857 // establishment of glial blood-brain barrier // inferred from expression pattern  |
| NM_001037859 | ///         |        | 0.04  |       | 1.01   | 1.03   | -1.12  | -1.02  | <i>Csf1r</i>                                | colony stimulating factor 1 receptor                                                   | 0001934 // positive regulation of protein phosphorylation // not recorded//0002376 // i    |
| NM_001081445 | ///         |        | 0.029 |       | 1.01   | -1.03  | -1.12  | -1.07  | <i>Ncam1</i>                                | neural cell adhesion molecule 1                                                        | 0001928 // regulation of exocyst assembly // inferred from mutant phenotype//000715:       |
| NM_0012      |             | 0.0382 |       |       | -1.11  | -1.32  | -1.12  | -1.03  | <i>Trim3</i>                                | tripartite motif-containing 3                                                          | 0006810 // transport // inferred from electronic annotation//0015031 // protein transp     |
| NM_0010      |             | 0.0196 | 0.036 |       | 1.12   | -1.07  | -1.12  | -1.02  | <i>Zfr2</i>                                 | zinc finger RNA binding protein 2                                                      | 0006955 // immune response // inferred from electronic annotation//0008152 // metab        |
| NM_009043    |             | 0.012  | 0.019 |       | 1.07   | -1.10  | -1.12  | -1.12  | <i>Reg2</i>                                 | regenerating islet-derived 2                                                           | 0001967 // suckling behavior // inferred from mutant phenotype//0042552 // myelinati       |
| NM_153119    | ///XM       |        | 0.003 |       | 1.04   | 1.12   | -1.12  | 1.08   | <i>Plekho2</i>                              | pleckstrin homology domain containing, family O member 2                               |                                                                                            |
| NM_028149    | ///NM       |        | 0.032 |       | 1.03   | 1.03   | -1.12  | 1.04   | <i>Fbxl20</i>                               | F-box and leucine-rich repeat protein 20                                               | 0001662 // behavioral fear response // inferred from mutant phenotype//0016567 // pr       |
| NM_1725      |             | 0.0116 | 0.011 | 0.011 | 1.08   | -1.06  | -1.12  | -1.14  | <i>Klhl11</i>                               | kelch-like 11                                                                          |                                                                                            |
| NM_0080      |             | 0.0455 | 0.003 |       | 1.11   | -1.00  | -1.12  | -1.06  | <i>Gas1</i>                                 | growth arrest specific 1                                                               | 0002053 // positive regulation of mesenchymal cell proliferation // inferred from mutant   |
| NM_011274    | ///XM       |        | 0.032 |       | 1.01   | 1.00   | -1.12  | 1.01   | <i>Uri1</i>                                 | URI1, prefoldin-like chaperone                                                         | 0000122 // negative regulation of transcription from RNA polymerase II promoter // not i   |
| NM_001252501 | ///NM_00    |        | 0.046 |       | -1.01  | 1.01   | -1.12  | -1.17  | <i>Sorcs1</i>                               | sortilin-related VPS10 domain containing receptor 1                                    |                                                                                            |
| NM_0075      |             | 0.0281 |       |       | -1.12  | 1.17   | -1.12  | -1.13  | <i>Cxcr5</i>                                | chemokine (C-X-C motif) receptor 5                                                     | 0006935 // chemotaxis // inferred from electronic annotation//0006955 // immune res        |
| NM_0166      |             | 0.018  |       |       | 1.00   | 1.14   | -1.12  | 1.01   | <i>Il27ra</i>                               | interleukin 27 receptor, alpha                                                         | 0002827 // positive regulation of T-helper 1 type immune response // inferred from muta    |
| NM_012034    | ///XM_00652 |        | 0.035 |       | -1.05  | -1.16  | -1.12  | -1.29  | <i>Tpsg1</i>                                | tryptase gamma 1                                                                       | 0006508 // proteolysis // inferred from electronic annotation                              |
| NM_001316370 | ///NM_00    |        | 0.038 |       | -1.66  | -1.71  | -1.12  | 1.05   | <i>P4ha1</i>                                | procollagen-proline, 2-oxoglutarate 4-dioxygenase (proline 4-hydroxylase), alpha 1 pol | 0018401 // peptidyl-proline hydroxylation to 4-hydroxy-L-proline // inferred from direct   |
| NM_008878    |             |        | 0.048 |       | -1.02  | -1.01  | -1.12  | -1.19  | <i>Serpinf2</i>                             | serine (or cysteine) peptidase inhibitor, clade F, member 2                            | 0002034 // regulation of blood vessel size by renin-angiotensin // inferred from mutant p  |
| NM_080448    | ///NM       |        | 0.047 |       | 1.03   | -1.10  | -1.12  | 1.01   | <i>Srgap3</i>                               | SLIT-ROBO Rho GTPase activating protein 3                                              | 0007165 // signal transduction // inferred from electronic annotation//0030336 // nega     |
| NM_1447      |             | 0.0171 | 0.043 |       | 1.14   | -1.09  | -1.12  | -1.13  | <i>Wt1</i>                                  | Wilms tumor 1 homolog                                                                  | 0000122 // negative regulation of transcription from RNA polymerase II promoter // not i   |
| NM_001146215 | ///         |        | 0.015 |       | 1.09   | 1.03   | -1.12  | -1.10  | <i>Msh5</i>                                 | mutS homolog 5 (E. coli)                                                               | 0000710 // meiotic mismatch repair // --//0006298 // mismatch repair // inferred from      |
| NM_001244198 | ///         |        | 0.009 |       | 1.12   | 1.05   | -1.12  | -1.09  | <i>Pax6</i>                                 | paired box 6                                                                           | 0000122 // negative regulation of transcription from RNA polymerase II promoter // infer   |
| NM_0202      |             | 0.0168 |       |       | 1.04   | -1.14  | -1.12  | -1.10  | <i>Cldn9</i>                                | claudin 9                                                                              | 0016338 // calcium-independent cell-cell adhesion via plasma membrane cell-adhesion n      |
| NM_1537      |             | 0.027  | 0.004 | 0.003 | 1.06   | -1.06  | -1.12  | -1.23  | <i>Rel12</i>                                | REL1-like 2                                                                            | 0010811 // positive regulation of cell-substrate adhesion // inferred from direct assay    |
| NM_1340      |             | 0.0011 | 0.043 |       | 1.12   | -1.11  | -1.12  | -1.06  | <i>Tbc1d10a</i>                             | TBC1 domain family, member 10a                                                         | 0042147 // retrograde transport, endosome to Golgi // not recorded//0043547 // posit       |
| NM_1332      |             | 0.0087 | 0.034 |       | 1.11   | -1.24  | -1.12  | 1.06   | <i>Zfp704</i>                               | zinc finger protein 704                                                                |                                                                                            |
| NM_001290792 | ///         |        | 0.036 |       | 1.01   | 1.06   | -1.12  | 1.07   | <i>Wdr45</i>                                | WD repeat domain 45                                                                    | 0000045 // autophagosome assembly // not recorded//0000422 // mitophagy // not rec         |
| NM_001276676 | ///NM_00    |        | 0.007 |       | 1.09   | 1.07   | -1.12  | -1.26  | <i>Syt6</i>                                 | synaptotagmin VI                                                                       | 0006906 // vesicle fusion // --//0007340 // acrosome reaction // inferred from direct as   |
| NM_0136      |             | 0.0232 | 0.018 |       | 1.00   | -1.15  | -1.12  | -1.00  | <i>Mt3</i>                                  | metallothionein 3                                                                      | 0000060 // protein import into nucleus, translocation // inferred from sequence or struct  |
| NM_001081363 | ///XM_00    |        | 0.017 |       | -1.11  | 1.00   | -1.12  | 1.12   | <i>Cenpf</i>                                | centromere protein F                                                                   | 0000278 // mitotic cell cycle // not recorded//0002724 // regulation of T cell cytokine pr |
| NM_030678    |             |        | 0.023 |       | -1.11  | -1.01  | -1.12  | 1.01   | <i>Gys1</i>                                 | glycogen synthase 1, muscle                                                            | 0005977 // glycogen metabolic process // not recorded//0005978 // glycogen biosynthe       |
| NM_0011      |             | 0.0353 |       |       | 1.02   | -1.24  | -1.12  | -1.09  | <i>Pclo</i>                                 | piccolo (presynaptic cytomatrix protein)                                               | 0007010 // cytoskeleton organization // inferred from direct assay//0007416 // synapse     |
| NM_001139520 | ///         |        | 0.021 |       | 1.09   | 1.07   | -1.12  | 1.04   | <i>Samhd1</i>                               | SAM domain and HD domain, 1                                                            | 0002376 // immune system process // inferred from electronic annotation//0006203 //        |
| NM_0011      |             | 0.0196 |       |       | -1.00  | -1.18  | -1.12  | 1.02   | <i>Mak</i>                                  | male germ cell-associated kinase                                                       | 0006351 // transcription, DNA-templated // inferred from electronic annotation//00063      |
| NM_011850    |             |        | 0.016 |       | 1.03   | 1.05   | -1.12  | -1.10  | <i>Nr0b2</i>                                | nuclear receptor subfamily 0, group B, member 2                                        | 0000122 // negative regulation of transcription from RNA polymerase II promoter // not i   |
| NM_0010      |             | 0.0262 | 0.017 |       | 1.02   | -1.28  | -1.12  | 1.10   | <i>Chka</i>                                 | choline kinase alpha                                                                   | 0006580 // ethanolamine metabolic process // not recorded//0006629 // lipid metaboli       |
| NM_013772    | ///XM       |        | 0.045 | 0.027 | 1.02   | -1.05  | -1.12  | -1.16  | <i>LOC100041483//Tcl1b3</i>                 | protein TCL1B3//T cell leukemia/lymphoma 1B, 3                                         |                                                                                            |
| NM_008175    |             |        | 0.006 |       | 1.06   | 1.03   | -1.12  | 1.06   | <i>Grrn</i>                                 | granulin                                                                               | 0001835 // blastocyst hatching // inferred from direct assay//0007566 // embryo implar     |
| NM_0011      |             | 0.0139 |       |       | -1.09  | 1.05   | -1.12  | -1.16  | <i>Tcf7l2</i>                               | transcription factor 7 like 2, T cell specific, HMG box                                | 0000122 // negative regulation of transcription from RNA polymerase II promoter // infer   |
| NM_0202      |             | 0.0258 |       |       | -1.18  | -1.03  | -1.12  | -1.15  | <i>Magea4</i>                               | melanoma antigen, family A, 4                                                          |                                                                                            |
| NM_0010      |             | 0.0348 |       |       | 1.02   | -1.08  | -1.12  | -1.12  | <i>Oxtr</i>                                 | oxytocin receptor                                                                      | 0001967 // suckling behavior // not recorded//0001975 // response to amphetamine //        |
| NM_1772      |             | 0.0207 |       |       | -1.03  | 1.10   | -1.12  | -1.13  | <i>Trac//Tnpo3//Traj15//Trav6-7-dv9//Tr</i> | T cell receptor alpha constant//transportin 3//T cell receptor alpha joining 15//T ce  | 0050852 // T cell receptor signaling pathway // --//0006606 // protein import into nucl    |
| NM_0281      |             | 0.0047 |       |       | 1.04   | -1.15  | -1.12  | -1.01  | <i>Nkd2</i>                                 | naked cuticle 2 homolog (Drosophila)                                                   | 0006810 // transport // inferred from electronic annotation//0006887 // exocytosis // ir   |
| NM_011663    |             | 0.013  |       |       | 1.06   | -1.19  | -1.12  | 1.02   | <i>Zrsr1</i>                                | zinc finger (CCCH type), RNA binding motif and serine/arginine rich 1                  |                                                                                            |
| NM_029096    | ///NM       |        | 0.027 | 0.01  | 1.04   | 1.04   | -1.12  | -1.10  | <i>Rita1</i>                                | RBPJ interacting and tubulin associated 1                                              | 0007219 // Notch signaling pathway // inferred from electronic annotation//0007399 //      |
| NM_009718    |             | 0.018  |       |       | 1.07   | -1.05  | -1.12  | -1.10  | <i>Neurog2</i>                              | neurogenin 2                                                                           | 0001764 // neuron migration // inferred from mutant phenotype//0006351 // transcrip/       |
| NM_0012      |             | 0.0412 |       |       | 1.05   | -1.12  | -1.12  | 1.09   | <i>Scnn1b</i>                               | sodium channel, nonvoltage-gated 1 beta                                                | 0001666 // response to hypoxia // inferred from electronic annotation//0002028 // regu     |
| NM_0081      |             | 0.0045 | ##### |       | 1.04   | -1.17  | -1.12  | -1.24  | <i>Gpr33</i>                                | G protein-coupled receptor 33                                                          | 0007165 // signal transduction // inferred from electronic annotation//0007186 // G-pr     |
| NM_001315503 | ///         |        | 0.032 |       | 1.05   | -1.08  | -1.12  | -1.11  | <i>Adcyap1</i>                              | adenylate cyclase activating polypeptide 1                                             | 0001541 // ovarian follicle development // not recorded//0001662 // behavioral fear re     |
| NM_001136064 | ///         |        | 0.05  |       | 1.05   | 1.04   | -1.12  | 1.05   | <i>Bscl2</i>                                | Berardinelli-Seip congenital lipodystrophy 2 homolog (seipin)                          | 0006629 // lipid metabolic process // inferred from electronic annotation//0016042 // li   |
| NM_016982    | ///NM       |        | 0.026 |       | 1.04   | -1.04  | -1.12  | -1.07  | <i>Vpreb1//Vpreb2</i>                       | pre-B lymphocyte gene 1//pre-B lymphocyte gene 2                                       | 0000902 // cell morphogenesis // inferred from genetic interaction//0002377 // immun       |
| NM_0087      |             | 0.0471 |       |       | 1.05   | -1.20  | -1.12  | -1.15  | <i>Ints6</i>                                | integrator complex subunit 6                                                           | 0016180 // snRNA processing // not recorded                                                |
| NM_0082      |             | 0.0125 |       |       | 1.08   | -1.37  | -1.12  | 1.18   | <i>Hpgd</i>                                 | hydroxyprostaglandin dehydrogenase 15 (NAD)                                            | 0006629 // lipid metabolic process // inferred from electronic annotation//0006631 // f.   |
| NM_144524    | ///XM       |        | 0.033 |       | 1.07   | 1.04   | -1.12  | -1.02  | <i>Angel1</i>                               | angel homolog 1 (Drosophila)                                                           |                                                                                            |
| NM_0089      |             | 0.006  |       |       | -1.03  | -1.19  | -1.12  | 1.00   | <i>Npepps</i>                               | aminopeptidase puromycin sensitive                                                     | 0006508 // proteolysis // inferred from electronic annotation//0043171 // peptide catal    |
| NM_026261    |             | 0.012  | 0.016 |       | 1.11   | -1.03  | -1.12  | -1.09  | <i>Ubl4b</i>                                | ubiquitin-like 4B                                                                      | 1903955 // positive regulation of protein targeting to mitochondrion // not recorded       |
| NM_0012      |             | 0.0252 |       |       | 1.01   | -1.13  | -1.12  | -1.18  | <i>Cdh23</i>                                | cadherin 23 (otocadherin)                                                              | 0006816 // calcium ion transport // not recorded//0007155 // cell adhesion // traceable    |
| NM_001198835 | ///NM_00    |        | 0.035 |       | 1.02   | -1.03  | -1.12  | -1.15  | <i>Coch</i>                                 | coagulation factor C homolog (Limulus polyphemus)                                      | 0007605 // sensory perception of sound // inferred from mutant phenotype//0008360 //       |
| NM_0100      |             | 0.0236 |       |       | 1.03   | -1.18  | -1.12  | 1.06   | <i>Dspp</i>                                 | dentin sialophosphoprotein                                                             | 0031214 // biomineral tissue development // inferred from electronic annotation//0071      |
| NM_0093      |             | 0.0413 | 0.02  | 0.028 | 1.09   | -1.09  | -1.12  | -1.19  | <i>Tecta</i>                                | tectorin alpha                                                                         | 0007160 // cell-matrix adhesion // inferred from electronic annotation//0007605 // sen:    |
| NM_0302      |             | 0.0478 |       |       | -1.01  | 1.09   | -1.11  | -1.10  | <i>Aacs</i>                                 | acetoacetyl-CoA synthetase                                                             | 0001889 // liver development // not recorded//0006629 // lipid metabolic process // inf    |
| NM_008108    | ///XM_00650 |        | 0.022 |       | -1.03  | 1.02   | -1.11  | -1.19  | <i>Gdf3</i>                                 | growth differentiation factor 3                                                        | 0001501 // skeletal system development // not recorded//0001654 // eye development         |
| NM_0012      |             | 0.03   | 0.037 | 0.006 | 1.15   | 1.00   | -1.11  | -1.16  | <i>Nxf2</i>                                 | nuclear RNA export factor 2                                                            | 0006405 // RNA export from nucleus // inferred from direct assay//0006405 // RNA exp       |

| RefSeq                 | Tri    | p 24h | p 48h | p 72h | FD Air | FD 24h | FD 48h | FD 72h | Gene Symbol          | Gene Title                                                                           | Gene Ontology Biological Process                                                                                                                                           |
|------------------------|--------|-------|-------|-------|--------|--------|--------|--------|----------------------|--------------------------------------------------------------------------------------|----------------------------------------------------------------------------------------------------------------------------------------------------------------------------|
| NM_178020              |        |       | 0.044 | -1.07 | 1.00   | -1.11  | -1.26  |        | <i>Hyal3</i>         | hyaluronoglucosaminidase 3                                                           | 0005975 // carbohydrate metabolic process // inferred from electronic annotation//0000001702 // gastrulation with mouth forming second // non-traceable author statement// |
| NM_023160//XM          |        | 0.043 |       | 1.01  | -1.05  | -1.11  | -1.13  |        | <i>Cml1</i>          | camello-like 1                                                                       | 0016567 // protein ubiquitination // inferred from electronic annotation//0035556 // in                                                                                    |
| NM_133346              |        |       | 0.045 | -1.01 | -1.09  | -1.11  | -1.11  |        | <i>Asb6</i>          | ankyrin repeat and SOCS box-containing 6                                             | 0001694 // histamine biosynthetic process // not recorded//0006955 // immune respon                                                                                        |
| NM_0169                | 0.0486 |       |       | 1.02  | -1.09  | -1.11  | -1.14  |        | <i>Prg3</i>          | proteoglycan 3                                                                       | 0006508 // proteolysis // inferred from electronic annotation//0008283 // cell proliferat                                                                                  |
| NM_0012                | 0.0134 |       |       | 1.11  | -1.02  | -1.11  | -1.02  |        | <i>Rhbdf1</i>        | rhomboid family 1 (Drosophila)                                                       | 0001819 // positive regulation of cytokine production // inferred from direct assay//000                                                                                   |
| NM_019450              |        |       | 0.05  | 1.03  | -1.04  | -1.11  | -1.13  |        | <i>Il1f6</i>         | interleukin 1 family, member 6                                                       | 0006468 // protein phosphorylation // not recorded//0007346 // regulation of mitotic c                                                                                     |
| NM_0088                | 0.0062 |       |       | -1.11 | 1.29   | -1.11  | 1.01   |        | <i>Pim1</i>          | proviral integration site 1                                                          | 0000122 // negative regulation of transcription from RNA polymerase II promoter // infer                                                                                   |
| NM_031184//XM          | 0.036  | 0.024 |       | 1.08  | 1.08   | -1.11  | -1.05  |        | <i>Glis2</i>         | GLIS family zinc finger 2                                                            | 0001570 // vasculogenesis // inferred from mutant phenotype//0001701 // in utero em                                                                                        |
| NM_001033402//         | 0.022  | 0.008 |       | 1.12  | 1.00   | -1.11  | -1.12  |        | <i>Zmiz1</i>         | zinc finger, MIZ-type containing 1                                                   | 0006810 // transport // inferred from electronic annotation//0006811 // ion transport                                                                                      |
| NM_030687//XM          | 0.029  | 0.04  |       | 1.08  | 1.00   | -1.11  | -1.04  |        | <i>Slco1a4</i>       | solute carrier organic anion transporter family, member 1a4                          | 0001503 // ossification // not recorded//0001954 // positive regulation of cell-matrix ad                                                                                  |
| NM_001113529//         | 0.011  |       |       | 1.10  | 1.06   | -1.11  | 1.05   |        | <i>Csf1</i>          | colony stimulating factor 1 (macrophage)                                             | 0000122 // negative regulation of transcription from RNA polymerase II promoter // infer                                                                                   |
| NM_0119                | 0.0397 |       |       | -1.15 | -1.04  | -1.11  | -1.14  |        | <i>Vax2</i>          | ventral anterior homeobox 2                                                          | 0006915 // apoptotic process // inferred from electronic annotation//0007165 // signal                                                                                     |
| NM_025886//XM          | 0.039  |       |       | 1.14  | 1.06   | -1.11  | 1.00   |        | <i>Rassf7</i>        | Ras association (RalGDS/AF-6) domain family (N-terminal) member 7                    | 0001666 // response to hypoxia // inferred from electronic annotation//0002028 // regu                                                                                     |
| NM_009301              |        |       | 0.019 | -1.07 | 1.01   | -1.11  | -1.05  |        | <i>Svs5</i>          | seminal vesicle secretory protein 5                                                  | 0007244 // negative regulation of thymocyte apoptotic process // inferred from mutant p                                                                                    |
| NM_008712//XM_006530   | 0.022  |       |       | -1.02 | -1.03  | -1.11  | -1.20  |        | <i>Nos1</i>          | nitric oxide synthase 1, neuronal                                                    | 0006810 // transport // inferred from electronic annotation//0006886 // intracellular pr                                                                                   |
| NM_011195              | 0.032  |       |       | 1.08  | -1.11  | -1.11  | -1.07  |        | <i>Ptcr</i>          | pre T cell antigen receptor alpha                                                    | 0007155 // cell adhesion // inferred from electronic annotation//0007156 // homophilic                                                                                     |
| NM_001136259//         | 0.023  |       |       | 1.04  | 1.04   | -1.11  | 1.06   |        | <i>Tom1</i>          | target of myb1 homolog (chicken)                                                     | 0006810 // transport // inferred from electronic annotation//0006811 // ion transport                                                                                      |
| NM_153112              |        | 0.049 |       | -1.10 | -1.09  | -1.11  | -1.23  |        | <i>Cadm4</i>         | cell adhesion molecule 4                                                             | 0001502 // ossification // not recorded//0001954 // positive regulation of cell-matrix ad                                                                                  |
| NM_031396//XM          | 0.004  | 0.022 |       | 1.11  | -1.01  | -1.11  | -1.13  |        | <i>Cnnm1</i>         | cyclin M1                                                                            | 0005975 // carbohydrate metabolic process // inferred from electronic annotation//000                                                                                      |
| NM_001302397//         | 0.048  |       |       | 1.15  | 1.00   | -1.11  | 1.05   |        | <i>Phf1</i>          | PHD finger protein 1                                                                 | 0008152 // metabolic process // inferred from electronic annotation                                                                                                        |
| NM_013630//XM          | 0.011  |       |       | 1.11  | -1.12  | -1.11  | 1.15   |        | <i>Pkd1</i>          | polycystic kidney disease 1 homolog                                                  | 0006351 // transcription, DNA-templated // inferred from electronic annotation//00063                                                                                      |
| NM_021715//XR_0029     |        |       | 0.029 | 1.08  | 1.00   | -1.11  | -1.13  |        | <i>Chst7</i>         | carbohydrate (N-acetylglucosamino) sulfotransferase 7                                | 0009060 // aerobic respiration // not recorded//0033617 // mitochondrial respiratory cl                                                                                    |
| XR_389155//XR_393665// | 0.048  |       | 0.029 | 1.01  | 1.00   | -1.11  | -1.18  |        | <i>Myo15b</i>        | myosin XVb                                                                           | 0001826 // inner cell mass cell differentiation // inferred from mutant phenotype//0006                                                                                    |
| NM_008022              |        |       | 0.029 | -1.05 | -1.07  | -1.11  | -1.40  |        | <i>Foxd4</i>         | forkhead box D4                                                                      | 0000122 // negative regulation of transcription from RNA polymerase II promoter // infer                                                                                   |
| NM_0253                | 0.0375 |       |       | -1.09 | 1.12   | -1.11  | -1.06  |        | <i>Chchd5</i>        | coiled-coil-helix-coiled-coil-helix domain containing 5                              | 0001701 // in utero embryonic development // inferred from mutant phenotype//0006:                                                                                         |
| NM_001285807//NM_00    | 0.04   |       |       | -1.06 | -1.10  | -1.11  | 1.03   |        | <i>Dtna</i>          | dystrobrevin alpha                                                                   | 0000122 // negative regulation of transcription from RNA polymerase II promoter // infer                                                                                   |
| NM_0012                | 0.049  |       |       | 1.08  | -1.09  | -1.11  | -1.09  |        | <i>Tet1</i>          | tet methylcytosine dioxygenase 1                                                     | 0001666 // response to hypoxia // inferred from electronic annotation//0002028 // regu                                                                                     |
| NM_008835//NR_028271   | 0.021  |       |       | -1.02 | -1.12  | -1.11  | -1.18  |        | <i>Phxr4</i>         | per-hexamer repeat gene 4                                                            | 0007244 // negative regulation of thymocyte apoptotic process // inferred from mutant p                                                                                    |
| NM_001316360//         | 0.025  |       |       | 1.07  | 1.34   | -1.11  | 1.10   |        | <i>Bmp4</i>          | bone morphogenetic protein 4                                                         | 0006810 // transport // inferred from electronic annotation//0006811 // ion transport                                                                                      |
| NM_0079                | 0.0266 |       |       | 1.09  | -1.20  | -1.11  | -1.18  |        | <i>Endog</i>         | endonuclease G                                                                       | 0001502 // ossification // not recorded//0001954 // positive regulation of cell-matrix ad                                                                                  |
| NM_024432//XM          | 0.034  |       |       | 1.12  | 1.02   | -1.11  | -1.08  |        | <i>Ubxn6</i>         | UBX domain protein 6                                                                 | 0006351 // transcription, DNA-templated // inferred from electronic annotation//00063                                                                                      |
| NM_001008542//         | 0.006  |       |       | 1.10  | 1.04   | -1.11  | 1.07   |        | <i>Mxi1</i>          | MAX interactor 1, dimerization protein                                               | 0001502 // ossification // not recorded//0001954 // positive regulation of cell-matrix ad                                                                                  |
| NM_001142335//         | 0.038  | 0.03  |       | 1.13  | 1.32   | -1.11  | -1.15  |        | <i>Lmo2</i>          | LIM domain only 2                                                                    | 0000122 // negative regulation of transcription from RNA polymerase II promoter // infer                                                                                   |
| NM_144518//XM          | 0.043  |       |       | 1.14  | -1.00  | -1.11  | -1.07  |        | <i>2900011008Rik</i> | RIKEN cDNA 2900011008 gene                                                           | 00035162 // embryonic hemopoiesis // inferred from genetic interaction//0042789 // mF                                                                                      |
| NM_001042528//NM_00    | 0.014  |       |       | -1.01 | -1.06  | -1.11  | -1.15  |        | <i>Cacna1b</i>       | calcium channel, voltage-dependent, N type, alpha 1B subunit                         | 0007026 // negative regulation of microtubule depolymerization // inferred from mutant                                                                                     |
| NM_0011 #####          | 0.027  |       |       | 1.15  | -1.09  | -1.11  | -1.00  |        | <i>Abl1</i>          | c-abl oncogene 1, non-receptor tyrosine kinase                                       | 0001956 // positive regulation of neurotransmitter secretion // not recorded//0006810                                                                                      |
| NM_0313                | 0.0019 |       |       | 1.04  | -1.13  | -1.11  | -1.02  |        | <i>Tex13</i>         | testis expressed gene 13                                                             | 0001922 // B-1 B cell homeostasis // inferred from mutant phenotype//0001934 // posi                                                                                       |
| NM_001301805//NM_00    | 0.017  |       |       | 1.06  | 1.03   | -1.11  | -1.22  |        | <i>Hes2</i>          | hairy and enhancer of split 2 (Drosophila)                                           | 0006351 // transcription, DNA-templated // inferred from electronic annotation//00063                                                                                      |
| NM_011040//XM_00649    | 0.036  |       |       | -1.17 | -1.09  | -1.11  | -1.07  |        | <i>Pax8</i>          | paired box 8                                                                         | 0001655 // urogenital system development // inferred from genetic interaction//00016:                                                                                      |
| NM_001081306//NM_00    | 0.029  |       |       | -1.16 | -1.08  | -1.11  | -1.05  |        | <i>Ptprz1</i>        | protein tyrosine phosphatase, receptor type Z, polypeptide 1                         | 0002244 // hematopoietic progenitor cell differentiation // inferred from mutant phenot                                                                                    |
| NM_007817              | 0.027  |       |       | -1.01 | -1.14  | -1.11  | 1.18   |        | <i>Cyp2f2</i>        | cytochrome P450, family 2, subfamily f, polypeptide 2                                | 0006805 // xenobiotic metabolic process // not recorded//0009636 // response to toxic                                                                                      |
| NM_153558//XM_00649    | 0.005  |       |       | -1.12 | -1.09  | -1.11  | 1.03   |        | <i>Obp2a</i>         | odorant binding protein 2A                                                           | 0006810 // transport // inferred from electronic annotation                                                                                                                |
| NM_015779              | 0.045  |       |       | 1.00  | 1.01   | -1.11  | -1.18  |        | <i>Elane</i>         | elastase, neutrophil expressed                                                       | 0000122 // negative regulation of transcription from RNA polymerase II promoter // not i                                                                                   |
| NM_0012                | 0.0151 |       |       | 1.02  | -1.15  | -1.11  | 1.00   |        | <i>Anks1</i>         | ankyrin repeat and SAM domain containing 1                                           | 0006929 // substrate-dependent cell migration // inferred from direct assay//0016322                                                                                       |
| NM_1452                | 0.0479 | 0.02  |       | 1.25  | -1.06  | -1.11  | 1.22   |        | <i>App12</i>         | adaptor protein, phosphotyrosine interaction, PH domain and leucine zipper containin | 0007049 // cell cycle // inferred from electronic annotation//0008283 // cell proliferatio                                                                                 |
| NM_0278                | 0.0113 |       |       | 1.02  | -1.09  | -1.11  | -1.06  |        | <i>Fam110c</i>       | family with sequence similarity 110, member C                                        | 0030335 // positive regulation of cell migration // not recorded//0051897 // positive reg                                                                                  |
| NM_0292                | 0.0201 |       |       | 1.05  | 1.23   | -1.11  | 1.03   |        | <i>Rnf19b</i>        | ring finger protein 19B                                                              | 0000209 // protein polyubiquitination // not recorded//0002250 // adaptive immune re                                                                                       |
| NM_009482              |        |       | 0.02  | 1.04  | -1.03  | -1.11  | -1.16  |        | <i>Utf1</i>          | undifferentiated embryonic cell transcription factor 1                               | 0006351 // transcription, DNA-templated // inferred from electronic annotation//00063                                                                                      |
| NM_0079                | 0.0015 | 0.017 | 0.005 | 1.07  | -1.11  | -1.11  | -1.18  |        | <i>Etv2</i>          | ets variant 2                                                                        | 0001701 // in utero embryonic development // inferred from mutant phenotype//0001:                                                                                         |
| NM_138955//XM_01124    | 0.04   |       |       | 1.03  | 1.00   | -1.11  | -1.10  |        | <i>Abcg4</i>         | ATP-binding cassette, sub-family G (WHITE), member 4                                 | 0006355 // regulation of transcription, DNA-templated // inferred from mutant phenoty                                                                                      |
| NM_0011                | 0.0207 |       |       | 1.03  | -1.10  | -1.11  | -1.10  |        | <i>Rab17</i>         | RAB17, member RAS oncogene family                                                    | 0002415 // immunoglobulin transcytosis in epithelial cells mediated by polymeric immun                                                                                     |
| NM_001290574//         | 0.031  |       |       | 1.09  | 1.02   | -1.11  | -1.08  |        | <i>Ppp1r3f</i>       | protein phosphatase 1, regulatory (inhibitor) subunit 3F                             | 0005979 // regulation of glycogen biosynthetic process // not recorded//2000465 // reg                                                                                     |
| NM_0115                | 0.0035 |       |       | 1.04  | -1.10  | -1.11  | -1.12  |        | <i>Sry</i>           | sex determining region of Chr Y                                                      | 0000122 // negative regulation of transcription from RNA polymerase II promoter // infer                                                                                   |
| NM_0104                | 0.0229 |       |       | 1.05  | -1.15  | -1.11  | -1.11  |        | <i>Hoxc6</i>         | homeobox C6                                                                          | 0006351 // transcription, DNA-templated // inferred from electronic annotation//00063                                                                                      |
| NM_001311152//         | 0.026  |       |       | 1.06  | 1.09   | -1.11  | -1.00  |        | <i>Rnf123</i>        | ring finger protein 123                                                              | 0016567 // protein ubiquitination // inferred from electronic annotation                                                                                                   |
| NM_029658              |        |       | 0.016 | -1.02 | -1.09  | -1.11  | -1.18  |        | <i>Fam101b</i>       | family with sequence similarity 101, member B                                        | 0001837 // epithelial to mesenchymal transition // inferred from genetic interaction//0C                                                                                   |
| NM_008003              |        |       | 0.017 | 1.03  | 1.01   | -1.11  | -1.14  |        | <i>Fgf15</i>         | fibroblast growth factor 15                                                          | 0001755 // neural crest cell migration // inferred from mutant phenotype//0001934 // i                                                                                     |
| NR_001463//NR_0002     | 0.013  | 0.003 |       | 1.03  | -1.04  | -1.11  | -1.10  |        | <i>Xist</i>          | inactive X specific transcripts                                                      | 0009048 // dosage compensation by inactivation of X chromosome // inferred from direc                                                                                      |
| NM_009253//XM_00651    | 0.019  |       |       | -1.14 | -1.09  | -1.11  | 1.00   |        | <i>Serpina3m</i>     | serine (or cysteine) peptidase inhibitor, clade A, member 3M                         | 0010466 // negative regulation of peptidase activity // inferred from electronic annotatio                                                                                 |
| NM_0194                | 0.0227 |       |       | 1.05  | -1.20  | -1.11  | 1.15   |        | <i>Epb414b</i>       | erythrocyte membrane protein band 4.1 like 4b                                        | 0010628 // positive regulation of gene expression // not recorded//0031032 // actomyo                                                                                      |
| NM_007848              |        |       | 0.016 | -1.01 | 1.02   | -1.10  | -1.17  |        | <i>Defa-rs7</i>      | defensin, alpha, related sequence 7                                                  | 0006952 // defense response // inferred from electronic annotation//0042742 // defens                                                                                      |
| NM_175244//XR_0036     |        |       | 0.036 | 1.08  | -1.01  | -1.10  | 1.01   |        | <i>Hectd3</i>        | HECT domain containing 3                                                             | 0016567 // protein ubiquitination // inferred from electronic annotation//0016567 // pr                                                                                    |
| NM_133235//XR_373242   | 0.02   |       |       | 1.06  | -1.03  | -1.10  | -1.20  |        | <i>Khdrbs2</i>       | KH domain containing, RNA binding, signal transduction associated 2                  | 0006351 // transcription, DNA-templated // inferred from electronic annotation//00063                                                                                      |
| NM_0076                | 0.0097 | 0.016 |       | 1.08  | -1.03  | -1.10  | 1.26   |        | <i>Cbr2</i>          | carbonyl reductase 2                                                                 | 0006116 // NADH oxidation // traceable author statement//0008152 // metabolic proce                                                                                        |

| RefSeq       | Tri   | p 24h   | p 48h | p 72h | FD Air | FD 24h | FD 48h | FD 72h | Gene Symbol          | Gene Title                                                                        | Gene Ontology Biological Process                                                           |
|--------------|-------|---------|-------|-------|--------|--------|--------|--------|----------------------|-----------------------------------------------------------------------------------|--------------------------------------------------------------------------------------------|
| NM_0217      |       | 0.0358  | 0.039 |       | -1.26  | -1.07  | -1.10  | -1.14  | <b>Trappc4</b>       | trafficking protein particle complex 4                                            | 0006810 // transport // inferred from electronic annotation//0006888 // ER to Golgi ves    |
| NM_001308327 | ///   | 0.008   |       |       | 1.06   | 1.13   | -1.10  | -1.15  | <b>Enpp1</b>         | ectonucleotide pyrophosphatase/phosphodiesterase 1                                | 0006091 // generation of precursor metabolites and energy // not recorded//0006796 /       |
| NM_146064    | ///XM | 0.045   |       |       | 1.05   | 1.05   | -1.10  | 1.02   | <b>Soat2</b>         | sterol O-acyltransferase 2                                                        | 0006629 // lipid metabolic process // inferred from electronic annotation//0008202 // s    |
| NM_0296      |       | 0.0475  |       |       | -1.14  | 1.03   | -1.10  | -1.09  | <b>Stambpl1</b>      | STAM binding protein like 1                                                       | 0006508 // proteolysis // inferred from electronic annotation                              |
| NM_198108    |       | 0.05    | 0.031 |       | 1.05   | 1.03   | -1.10  | -1.11  | <b>Morn4</b>         | MORN repeat containing 4                                                          |                                                                                            |
| NM_025716    |       | 0.048   |       |       | 1.05   | 1.06   | -1.10  | 1.10   | <b>Spryd4</b>        | SPRY domain containing 4                                                          |                                                                                            |
| NM_008759    |       | 0.025   | 0.035 |       | 1.03   | -1.10  | -1.10  | -1.16  | <b>Sebox</b>         | SEBOX homeobox                                                                    | 0006351 // transcription, DNA-templated // inferred from electronic annotation//00063      |
| NM_001177594 | ///   | 0.028   |       |       | 1.09   | -1.01  | -1.10  | 1.04   | <b>Slc8b1</b>        | solute carrier family 8 (sodium/lithium/calcium exchanger), member B1             | 0006810 // transport // inferred from electronic annotation//0006811 // ion transport /    |
| NM_0198      |       | 0.0063  |       |       | 1.06   | 1.40   | -1.10  | 1.36   | <b>Dusp14</b>        | dual specificity phosphatase 14                                                   | 0000188 // inactivation of MAPK activity // inferred from electronic annotation//00064;    |
| NM_133643    | ///XM | 0.00651 | 0.007 |       | -1.00  | -1.01  | -1.10  | -1.22  | <b>Edaradd</b>       | EDAR (ectodysplasin-A receptor)-associated death domain                           | 0001942 // hair follicle development // inferred from genetic interaction//0007165 // si   |
| NM_0010      |       | 0.0171  |       |       | 1.05   | -1.49  | -1.10  | 1.33   | <b>Rtkn2</b>         | rhotekin 2                                                                        | 0008284 // positive regulation of cell proliferation // inferred from direct assay//003009 |
| NM_010149    | ///XM | 0.003   | 0.025 |       | 1.10   | 1.05   | -1.10  | -1.12  | <b>Epor</b>          | erythropoietin receptor                                                           | 0003007 // heart morphogenesis // traceable author statement//0007165 // signal tran       |
| NM_001145876 | ///   | 0.006   |       |       | 1.05   | -1.01  | -1.10  | 1.06   | <b>Slc25a44</b>      | solute carrier family 25, member 44                                               | 0006810 // transport // inferred from electronic annotation//0055085 // transmembrar       |
| NM_054095    | ///XM | 0.045   |       | 0.002 | 1.06   | -1.02  | -1.10  | -1.13  | <b>Necab2</b>        | N-terminal EF-hand calcium binding protein 2                                      | 0042984 // regulation of amyloid precursor protein biosynthetic process // not recorded    |
| NM_138955    | ///XM | 0.013   |       |       | 1.03   | -1.05  | -1.10  | -1.10  | <b>Abcg4</b>         | ATP-binding cassette, sub-family G (WHITE), member 4                              | 0006355 // regulation of transcription, DNA-templated // inferred from mutant phenoty      |
| NM_0012      |       | 0.0383  | 0.007 | 0.012 | 1.05   | -1.11  | -1.10  | -1.12  | <b>Pde10a</b>        | phosphodiesterase 10A                                                             | 0006198 // cAMP catabolic process // not recorded//0007165 // signal transduction // i     |
| NM_001285487 | ///   | 0.025   |       |       | 1.06   | 1.04   | -1.10  | 1.01   | <b>Mknk1</b>         | MAP kinase-interacting serine/threonine kinase 1                                  | 0006417 // regulation of translation // inferred from electronic annotation//0006446 // i  |
| NM_0010      |       | 0.0045  |       |       | 1.07   | -1.17  | -1.10  | 1.17   | <b>5330417C22Rik</b> | RIKEN cDNA 5330417C22 gene                                                        | 0006914 // autophagy // inferred from electronic annotation//0009267 // cellular respo     |
| NM_0011      |       | 0.0081  |       | 0.043 | 1.09   | -1.14  | -1.10  | -1.03  | <b>Rapgef3</b>       | Rap guanine nucleotide exchange factor (GEF) 3                                    | 0001525 // angiogenesis // inferred from electronic annotation//0001932 // regulation      |
| NM_080555    |       |         | 0.015 |       | 1.03   | -1.01  | -1.10  | -1.06  | <b>Ppp3</b>          | phospholipid phosphatase 3                                                        | 0001568 // blood vessel development // inferred from mutant phenotype//0001702 // g        |
| NM_0297      |       | 0.002   |       |       | -1.16  | 1.13   | -1.10  | 1.01   | <b>Rps9</b>          | ribosomal protein S9                                                              | 0006412 // translation // not recorded//0008284 // positive regulation of cell proliferat  |
| NM_133902    | ///XM | 0.01124 | 0.01  |       | -1.05  | 1.08   | -1.10  | -1.29  | <b>Sds1</b>          | serine dehydratase-like                                                           | 0006565 // L-serine catabolic process // not recorded//0006567 // threonine catabolic c    |
| NM_0011      |       | 0.0011  | 0.019 |       | 1.03   | -1.10  | -1.10  | -1.10  | <b>Cd160</b>         | CD160 antigen                                                                     | 0007165 // signal transduction // ---//0007165 // signal transduction // inferred from el  |
| NM_008167    | ///XM | 0.00650 | 0.007 |       | 1.00   | -1.04  | -1.10  | -1.17  | <b>Grid2</b>         | glutamate receptor, ionotropic, delta 2                                           | 0006810 // transport // inferred from electronic annotation//0006811 // ion transport /    |
| NM_0114      |       | 0.0207  |       |       | 1.01   | -1.17  | -1.10  | 1.08   | <b>Sox13</b>         | SRY (sex determining region Y)-box 13                                             | 0006351 // transcription, DNA-templated // inferred from electronic annotation//00063      |
| NM_0256      |       | 0.0055  |       |       | 1.02   | -1.22  | -1.10  | -1.13  | <b>Mis18a</b>        | MIS18 kinetochore protein homolog A (S. pombe)                                    | 0007049 // cell cycle // inferred from electronic annotation//0007059 // chromosome s      |
| NM_0011      |       | 0.0106  |       |       | 1.05   | -1.18  | -1.10  | -1.08  | <b>Cbfa2t3</b>       | core-binding factor, runt domain, alpha subunit 2, translocated to, 3 (human)     | 0000122 // negative regulation of transcription from RNA polymerase II promoter // infer   |
| NM_009430    |       |         | 0.014 |       | -1.01  | 1.04   | -1.10  | -1.18  | <b>Prss2</b>         | protease, serine 2                                                                | 0006508 // proteolysis // not recorded//0007584 // response to nutrient // inferred fro    |
| NM_0095      |       | 0.041   |       |       | 1.27   | -1.44  | -1.10  | -1.13  | <b>Plagl1</b>        | pleiomorphic adenoma gene-like 1                                                  | 0006351 // transcription, DNA-templated // inferred from electronic annotation//00063      |
|              |       | 0.0283  |       |       | -1.05  | -1.19  | -1.10  | -1.23  | <b>BC038268</b>      | cDNA sequence BC038268                                                            | 0001503 // ossification // inferred from electronic annotation//0001822 // kidney devel    |
| NM_0254      |       | 0.0274  |       |       | -1.01  | -1.28  | -1.10  | -1.17  | <b>Arl4d</b>         | ADP-ribosylation factor-like 4D                                                   | 0007264 // small GTPase mediated signal transduction // inferred from electronic annota    |
| NM_0096      |       | 0.0444  | 0.013 | 0.017 | -1.99  | -1.23  | -1.10  | -1.08  | <b>Alb</b>           | albumin                                                                           | 0001895 // retina homeostasis // inferred from electronic annotation//0006810 // trans     |
| NM_1453      |       | 0.024   | 0.041 |       | 1.07   | -1.09  | -1.10  | -1.05  | <b>Mrgprf</b>        | MAS-related GPR, member F                                                         | 0007165 // signal transduction // inferred from electronic annotation//0007186 // G-pr     |
| NM_133980    | ///XM | 0.038   | 0.011 |       | 1.06   | -1.06  | -1.10  | -1.16  | <b>Slc22a13</b>      | solute carrier family 22 (organic cation transporter), member 13                  | 0015747 // urate transport // not recorded//0055085 // transmembrane transport // nc       |
| NM_0290      | ##### |         |       |       | -1.03  | -1.39  | -1.10  | -1.11  | <b>Spsb1</b>         | splA/ryanodine receptor domain and SOCS box containing 1                          | 0016567 // protein ubiquitination // inferred from electronic annotation//0035556 // i     |
| NM_021316    | ///XM | 0.00653 | 0.024 |       | 1.05   | -1.01  | -1.10  | -1.14  | <b>Cend1</b>         | cell cycle exit and neuronal differentiation 1                                    | 0007628 // adult walking behavior // inferred from mutant phenotype//0021549 // cere       |
| NM_144790    | ///XM | 0.00652 | 0.043 |       | 1.04   | -1.09  | -1.10  | -1.20  | <b>Ankrd33</b>       | ankyrin repeat domain 33                                                          | 0000122 // negative regulation of transcription from RNA polymerase II promoter // infer   |
| XM_006504541 | ///XM | 0.006   | 0.043 |       | 1.02   | -1.03  | -1.10  | -1.21  | <b>Muc3</b>          | mucin 3, intestinal                                                               | 0001975 // cellular homeostasis // traceable author statement                              |
| NM_144820    | ///XM | 0.00651 | 0.036 |       | 1.02   | -1.08  | -1.10  | -1.14  | <b>Ccdc28a</b>       | coiled-coil domain containing 28A                                                 |                                                                                            |
| NM_0012      |       | 0.002   |       |       | 1.03   | -1.04  | -1.10  | 1.22   | <b>Ager</b>          | advanced glycosylation end product-specific receptor                              | 0001666 // response to hypoxia // inferred from mutant phenotype//0001933 // negati        |
| NM_028625    |       |         | 0.038 |       | 1.02   | -1.11  | -1.10  | -1.17  | <b>Lce1a2</b>        | late cornified envelope 1A2                                                       | 0008544 // epidermis development // inferred from electronic annotation//0018149 // i      |
| NM_013822    | ///XM | 0.01123 | 0.029 |       | -1.05  | -1.01  | -1.10  | 1.03   | <b>Jag1</b>          | jagged 1                                                                          | 0001974 // blood vessel remodeling // inferred from mutant phenotype//0002011 // mc        |
| NM_058214    | ///XM | 0.00652 | 0.028 |       | 1.03   | 1.03   | -1.10  | -1.14  | <b>Recq4</b>         | RecQ protein-like 4                                                               | 0000733 // DNA strand renaturation // not recorded//0001501 // skeletal system devel       |
| NM_1455      |       | 0.027   |       |       | 1.13   | -1.04  | -1.10  | -1.06  | <b>Ccm1</b>          | cerebral cavernous malformation 2-like                                            | 0003209 // cardiac atrium morphogenesis // inferred from genetic interaction//0003222      |
| NM_021452    | ///XM | 0.007   |       |       | 1.19   | 1.05   | -1.10  | 1.09   | <b>Kcnmb4</b>        | potassium large conductance calcium-activated channel, subfamily M, beta member 4 | 0001508 // action potential // not recorded//0005513 // detection of calcium ion // not    |
| NM_011434    |       | 0.018   |       |       | -1.01  | -1.11  | -1.10  | -1.13  | <b>Sod1</b>          | superoxide dismutase 1, soluble                                                   | 0000187 // activation of MAPK activity // inferred from direct assay//0000302 // respon    |
| NM_026273    | ///XM | 0.024   |       |       | 1.10   | -1.06  | -1.10  | -1.07  | <b>4930453N24Rik</b> | RIKEN cDNA 4930453N24 gene                                                        | 0006915 // apoptotic process // inferred from electronic annotation                        |
| NM_0010      |       | 0.0355  |       |       | 1.06   | -1.19  | -1.10  | -1.03  | <b>Rgs11</b>         | regulator of G-protein signaling 11                                               | 0007186 // G-protein coupled receptor signaling pathway // traceable author statement/     |
| NM_0012      |       | 0.0239  |       |       | -1.04  | 1.12   | -1.10  | -1.17  | <b>Socs1</b>         | suppressor of cytokine signaling 1                                                | 0001932 // regulation of protein phosphorylation // inferred from direct assay//000646     |
| NM_0010      |       | 0.0264  |       |       | 1.27   | -1.21  | -1.10  | 1.62   | <b>Gpr155</b>        | G protein-coupled receptor 155                                                    | 0035556 // intracellular signal transduction // inferred from electronic annotation//0005  |
| NM_0087      |       | 0.0437  |       |       | 1.02   | -1.08  | -1.10  | -1.09  | <b>Pcp4</b>          | Purkinje cell protein 4                                                           | 0006469 // negative regulation of protein kinase activity // not recorded//0010976 // pc   |
| NM_1789      |       | 0.0033  |       |       | -1.08  | 1.50   | -1.10  | -1.05  | <b>Pld4</b>          | phospholipase D family, member 4                                                  | 0002244 // hematopoietic progenitor cell differentiation // inferred from mutant phenot    |
| NM_011437    | ///XM | 0.00652 | 0.002 |       | 1.03   | 1.00   | -1.09  | -1.09  | <b>Sox10</b>         | SRY (sex determining region Y)-box 10                                             | 0001701 // in utero embryonic development // inferred from genetic interaction//0001:      |
| NM_028216    |       | 0.001   |       |       | 1.06   | 1.06   | -1.09  | -1.17  | <b>Psca</b>          | prostate stem cell antigen                                                        |                                                                                            |
| NM_026716    |       | 0.033   |       |       | -1.00  | 1.01   | -1.09  | -1.11  | <b>Syca</b>          | syncollin                                                                         | 0006887 // exocytosis // inferred from electronic annotation                               |
| NM_012013    | ///XM | 0.00650 | 0.026 |       | -1.07  | 1.01   | -1.09  | -1.33  | <b>Figla</b>         | folliculogenesis specific basic helix-loop-helix                                  | 0006351 // transcription, DNA-templated // inferred from electronic annotation//00063      |
| NM_0287      |       | 0.0144  |       |       | -1.02  | -1.15  | -1.09  | -1.17  | <b>Slc7a13</b>       | solute carrier family 7, (cationic amino acid transporter, y+ system) member 13   | 0003333 // amino acid transmembrane transport // not recorded//0006810 // transpor         |
| NM_0296      |       | 0.0064  | 0.003 |       | 1.10   | -1.00  | -1.09  | 1.06   | <b>Abhd14b</b>       | abhydrolase domain containing 14b                                                 | 0008152 // metabolic process // not recorded//0045944 // positive regulation of transcr    |
| NM_027454    | ///NM | 0.17321 | 0.024 |       | 1.07   | -1.07  | -1.09  | -1.18  | <b>Chrb3</b>         | cholinergic receptor, nicotinic, beta polypeptide 3                               | 0006810 // transport // inferred from electronic annotation//0006811 // ion transport /    |
| NM_019741    | ///XM | 0.037   | 0.003 |       | 1.07   | 1.01   | -1.09  | -1.16  | <b>Slc2a5</b>        | solute carrier family 2 (facilitated glucose transporter), member 5               | 0006810 // transport // inferred from electronic annotation//0008643 // carbohydrate t     |
| NM_008818    |       | 0.033   |       |       | -1.05  | -1.02  | -1.09  | -1.23  | <b>Rhox5</b>         | reproductive homeobox 5                                                           | 0000122 // negative regulation of transcription from RNA polymerase II promoter // infer   |
| NM_001081373 | ///   | 0.027   | 0.001 |       | 1.05   | 1.04   | -1.09  | -1.23  | <b>Cep164</b>        | centrosomal protein 164                                                           | 0006281 // DNA repair // inferred from electronic annotation//0006974 // cellular resp     |
| NM_1455      |       | 0.0293  | 0.032 | 0.036 | 1.04   | -1.08  | -1.09  | -1.09  | <b>Myopop</b>        | Myb-related transcription factor, partner of profilin                             | 0000122 // negative regulation of transcription from RNA polymerase II promoter // infer   |
| NM_0011      |       | 0.041   |       |       | 1.09   | -1.22  | -1.09  | 1.13   | <b>Trim32</b>        | tripartite motif-containing 32                                                    | 0000209 // protein polyubiquitination // not recorded//0001894 // tissue homeostasis /     |

| RefSeq                | Tri.p  | 24h   | p     | 48h   | p | 72h | FD Air | FD 24h | FD 48h | FD 72h | Gene Symbol             | Gene Title                                                                              | Gene Ontology Biological Process                                                           |                                                                                      |
|-----------------------|--------|-------|-------|-------|---|-----|--------|--------|--------|--------|-------------------------|-----------------------------------------------------------------------------------------|--------------------------------------------------------------------------------------------|--------------------------------------------------------------------------------------|
| NM_008410             |        |       | 0.031 |       |   |     | 1.01   | -1.03  | -1.09  | -1.03  | <i>Itm2b</i>            | integral membrane protein 2B                                                            | 0042985 // negative regulation of amyloid precursor protein biosynthetic process // not r  |                                                                                      |
| NM_0134               | 0.031  |       |       |       |   |     | 1.02   | -1.25  | -1.09  | 1.15   | <i>Aldh1a1</i>          | aldehyde dehydrogenase family 1, subfamily A1                                           | 0001822 // kidney development // inferred from electronic annotation//0001889 // live      |                                                                                      |
| NM_0093               | 0.0117 |       |       |       |   |     | 1.17   | -1.01  | -1.09  | 1.13   | <i>Inmt</i>             | indolethylamine N-methyltransferase                                                     | 0009308 // amine metabolic process // not recorded//0009636 // response to toxic sub:      |                                                                                      |
| NM_0012               | 0.0371 | 0.027 |       |       |   |     | 1.10   | -1.09  | -1.09  | -1.07  | <i>Slc4a10</i>          | solute carrier family 4, sodium bicarbonate cotransporter-like, member 10               | 0006486 // protein glycosylation // not recorded//0006810 // transport // inferred from    |                                                                                      |
| NM_026602//XM_006501  |        |       | 0.01  |       |   |     | -1.21  | -1.08  | -1.09  | 1.13   | <i>Bcas2</i>            | breast carcinoma amplified sequence 2                                                   | 0000398 // mRNA splicing, via spliceosome // not recorded//0006397 // mRNA processi        |                                                                                      |
| NM_017373//XM_0024    |        |       | 0.024 |       |   |     | -1.53  | -1.31  | -1.09  | -1.34  | <i>Nfil3</i>            | nuclear factor, interleukin 3, regulated                                                | 0000122 // negative regulation of transcription from RNA polymerase II promoter // not i   |                                                                                      |
| NM_1336               | 0.0187 |       |       |       |   |     | 1.07   | -1.18  | -1.09  | -1.06  | <i>Ppp1r32</i>          | protein phosphatase 1, regulatory subunit 32                                            |                                                                                            |                                                                                      |
| NM_0010               | 0.0204 |       |       |       |   |     | -1.01  | -1.20  | -1.09  | -1.03  | <i>Sorbs1</i>           | sorbin and SH3 domain containing 1                                                      | 0006810 // transport // inferred from electronic annotation//0007015 // actin filament     |                                                                                      |
| NM_0298               | 0.0201 |       |       |       |   |     | -1.04  | -1.19  | -1.09  | 1.13   | <i>Gppb11i</i>          | GC-rich promoter binding protein 1-like 1                                               | 0006351 // transcription, DNA-templated // inferred from electronic annotation//00063      |                                                                                      |
| NM_0011               | 0.0433 |       |       |       |   |     | 1.02   | 1.34   | -1.09  | -1.03  | <i>Arhgap4</i>          | Rho GTPase activating protein 4                                                         | 0007165 // signal transduction // inferred from electronic annotation//0010764 // nega     |                                                                                      |
| NM_0011               | 0.001  |       |       |       |   |     | 1.06   | -1.11  | -1.09  | -1.06  | <i>Syt3</i>             | synaptotagmin III                                                                       | 0006906 // vesicle fusion // ---//0016079 // synaptic vesicle exocytosis // not recorded// |                                                                                      |
| NM_025402             |        | 0.042 |       |       |   |     | 1.01   | 1.06   | -1.09  | -1.04  | <i>Ogfod3</i>           | 2-oxoglutarate and iron-dependent oxygenase domain containing 3                         | 0055114 // oxidation-reduction process // inferred from electronic annotation              |                                                                                      |
|                       |        |       |       |       |   |     | 0.018  | -1.02  | -1.01  | -1.09  | <i>D4Ert4117e</i>       | DNA segment, Chr 4, ERATO Doi 117, expressed                                            |                                                                                            |                                                                                      |
| NM_145156//XM_0014    |        |       | 0.014 |       |   |     | 1.05   | 1.12   | -1.09  | -1.11  | <i>Slc25a28</i>         | solute carrier family 25, member 28                                                     | 0006810 // transport // inferred from electronic annotation//0006811 // ion transport /    |                                                                                      |
| NM_0103               | #####  | 0.003 | 0.027 |       |   |     | 1.08   | -1.16  | -1.09  | -1.06  | <i>H2-Ea-ps</i>         | histocompatibility 2, class II antigen E alpha, pseudogene                              | 0002376 // immune system process // inferred from electronic annotation//0002504 //        |                                                                                      |
| NM_001048190//        |        |       | 0.029 |       |   |     | 1.10   | -1.01  | -1.09  | -1.02  | <i>Agbl5</i>            | ATP/GTP binding protein-like 5                                                          | 0006508 // proteolysis // inferred from electronic annotation//0035608 // protein degl     |                                                                                      |
| NM_0213               | #####  |       |       |       |   |     | 1.04   | -1.34  | -1.09  | -1.14  | <i>Klf13</i>            | Kruppel-like factor 13                                                                  | 0006351 // transcription, DNA-templated // inferred from electronic annotation//00063      |                                                                                      |
| NM_013809             |        | 0.044 |       |       |   |     | 1.10   | -1.05  | -1.09  | -1.17  | <i>Cyp2g1</i>           | cytochrome P450, family 2, subfamily g, polypeptide 1                                   | 0006805 // xenobiotic metabolic process // not recorded//0019373 // epoxygenase P45        |                                                                                      |
| NM_133185//XM_01124   |        |       | 0.009 |       |   |     | 1.03   | 1.13   | -1.09  | -1.11  | <i>Rogdi</i>            | rogdi homolog (Drosophila)                                                              | 0007420 // brain development // not recorded//0008284 // positive regulation of cell p     |                                                                                      |
| NM_0107               | 0.0044 |       |       |       |   |     | 1.03   | 1.80   | -1.09  | -1.03  | <i>Ly6d</i>             | lymphocyte antigen 6 complex, locus D                                                   | 0030098 // lymphocyte differentiation // inferred from expression pattern//0035634 //      |                                                                                      |
| NM_0012               | 0.0315 | 0.024 | 0.009 |       |   |     | 1.11   | -1.00  | -1.09  | -1.13  | <i>Pla2g10</i>          | phospholipase A2, group X                                                               | 0006629 // lipid metabolic process // inferred from electronic annotation//0006644 // p    |                                                                                      |
| NM_0215               | 0.0033 |       |       |       |   |     | -1.01  | 1.17   | -1.09  | 1.12   | <i>Chst12</i>           | carbohydrate sulfotransferase 12                                                        | 0005975 // carbohydrate metabolic process // inferred from electronic annotation//001      |                                                                                      |
| NM_0010               | 0.0268 |       |       |       |   |     | 1.01   | -1.12  | -1.09  | -1.03  | <i>Mrpl44</i>           | mitochondrial ribosomal protein L44                                                     | 0006396 // RNA processing // inferred from electronic annotation//0070125 // mitocho       |                                                                                      |
| NM_0013               | 0.0322 |       |       |       |   |     | -1.11  | -1.37  | -1.09  | -1.01  | <i>Figf</i>             | c-fos induced growth factor                                                             | 0001525 // angiogenesis // inferred from electronic annotation//0001666 // response t      |                                                                                      |
| NM_033320//XM_006511  |        |       | 0.024 |       |   |     | -1.06  | -1.07  | -1.09  | 1.13   | <i>Glce</i>             | glucuronyl C5-epimerase                                                                 | 0006024 // glycosaminoglycan biosynthetic process // inferred from electronic annotat      |                                                                                      |
| NM_001146707//        |        |       | 0.001 | 0.037 |   |     | 1.05   | -1.06  | -1.09  | -1.03  | <i>Gm4204//Nap11</i>    | nucleosome assembly protein 1-like 1 pseudogene//nucleosome assembly protein 1-         | 0006334 // nucleosome assembly // inferred from electronic annotation//0014010 // Sc       |                                                                                      |
| NM_175133//XM_0021    |        |       | 0.021 |       |   |     | 1.05   | -1.02  | -1.09  | -1.05  | <i>Gucd1</i>            | guanylyl cyclase domain containing 1                                                    |                                                                                            |                                                                                      |
| NM_0011               | 0.0264 | 0.033 |       |       |   |     | 1.12   | -1.06  | -1.09  | 1.21   | <i>Dhrs3</i>            | dehydrogenase/reductase (SDR family) member 3                                           | 0001523 // retinoid metabolic process // inferred from mutant phenotype//0003151 //        |                                                                                      |
| NM_029360             |        | 0.016 |       |       |   |     | 1.08   | 1.08   | -1.09  | -1.03  | <i>Tm4sf5</i>           | transmembrane 4 superfamily member 5                                                    |                                                                                            |                                                                                      |
| NM_0294               | 0.0042 |       |       |       |   |     | -1.07  | -1.37  | -1.09  | -1.09  | <i>Them4</i>            | thioesterase superfamily member 4                                                       | 0006629 // lipid metabolic process // inferred from electronic annotation//0006631 // f.   |                                                                                      |
| NM_0261               | 0.0326 |       |       |       |   |     | 1.07   | -1.13  | -1.09  | -1.11  | <i>Ppp1r2-ps9</i>       | protein phosphatase 1, regulatory (inhibitor) subunit 2, pseudogene 9                   |                                                                                            |                                                                                      |
| NM_0080               | 0.0073 |       |       |       |   |     | 1.01   | -1.29  | -1.09  | -1.08  | <i>Gata2</i>            | GATA binding protein 2                                                                  | 0000122 // negative regulation of transcription from RNA polymerase II promoter // infer   |                                                                                      |
| NM_0187               | 0.005  |       |       |       |   |     | -1.04  | -1.42  | -1.09  | 1.08   | <i>Cpq</i>              | carboxypeptidase Q                                                                      | 0006508 // proteolysis // not recorded//0006590 // thyroid hormone generation // not       |                                                                                      |
| NM_001025599//        |        |       | 0.011 | 0.041 |   |     | 1.07   | -1.01  | -1.09  | -1.03  | <i>Trim26</i>           | tripartite motif-containing 26                                                          | 0045087 // innate immune response // not recorded//0046597 // negative regulation of       |                                                                                      |
| NM_010791             |        | 0.008 |       |       |   |     | -1.01  | -1.02  | -1.09  | -1.17  | <i>Meox1</i>            | mesenchyme homeobox 1                                                                   | 0001757 // somite specification // inferred from genetic interaction//0006351 // transcr   |                                                                                      |
| NM_011246             |        | 0.014 |       |       |   |     | 1.03   | -1.01  | -1.09  | -1.13  | <i>Rasgrp1</i>          | RAS guanyl releasing protein 1                                                          | 0001816 // cytokine production // inferred from mutant phenotype//0001934 // positiv       |                                                                                      |
| NM_025974//NR_110499  |        |       | 0.028 |       |   |     | -1.07  | -1.02  | -1.09  | -1.12  | <i>Rpl14//Rpl14-ps1</i> | ribosomal protein L14//ribosomal protein L14, pseudogene 1                              | 0006364 // rRNA processing // not recorded//0006412 // translation // inferred from el     |                                                                                      |
| NM_0010               | 0.0076 |       |       |       |   |     | 0.038  | 1.11   | -1.06  | -1.09  | 1.01                    | <i>Mink1</i>                                                                            | missshapen-like kinase 1 (zebrafish)                                                       | 0000165 // MAPK cascade // not recorded//0001952 // regulation of cell-matrix adhesi |
| NM_0012               | 0.0372 |       |       |       |   |     | 1.06   | -1.06  | -1.09  | -1.21  | <i>Dtx2</i>             | deltex 2 homolog (Drosophila)                                                           | 0007219 // Notch signaling pathway // inferred from direct assay//0007219 // Notch sig     |                                                                                      |
| NM_0113               | 0.0122 |       |       |       |   |     | 1.06   | 1.41   | -1.09  | -1.30  | <i>Spi1</i>             | spleen focus forming virus (SFFV) proviral integration oncogene                         | 0000122 // negative regulation of transcription from RNA polymerase II promoter // infer   |                                                                                      |
| NM_0012               | 0.001  |       |       |       |   |     | 1.04   | 1.52   | -1.08  | 1.04   | <i>Lrmp</i>             | lymphoid-restricted membrane protein                                                    | 0002376 // immune system process // inferred from electronic annotation//0007338 //        |                                                                                      |
| NM_177242             |        | 0.043 |       |       |   |     | 1.04   | -1.08  | -1.08  | 1.00   | <i>Pptc7</i>            | PTC7 protein phosphatase homolog (S. cerevisiae)                                        | 0006470 // protein dephosphorylation // inferred from electronic annotation//0008152       |                                                                                      |
| NM_0106               | 0.0204 |       |       |       |   |     | 1.00   | 1.25   | -1.08  | 1.02   | <i>Lcp2</i>             | lymphocyte cytosolic protein 2                                                          | 0006955 // immune response // not recorded//0007169 // transmembrane receptor pr           |                                                                                      |
| NM_0117               | 0.0275 |       |       |       |   |     | -1.11  | -1.00  | -1.08  | -1.16  | <i>Xcr1</i>             | chemokine (C motif) receptor 1                                                          | 0006935 // chemotaxis // inferred from direct assay//0007165 // signal transduction // i   |                                                                                      |
| NM_008763             |        | 0.045 |       |       |   |     | -1.08  | -1.20  | -1.08  | -1.01  | <i>Olfr16</i>           | olfactory receptor 16                                                                   | 0007165 // signal transduction // inferred from electronic annotation//0007186 // G-pr     |                                                                                      |
| NM_0010               | 0.0154 |       |       |       |   |     | 1.08   | -1.13  | -1.08  | -1.05  | <i>Lgr6</i>             | leucine-rich repeat-containing G protein-coupled receptor 6                             | 0007165 // signal transduction // inferred from electronic annotation//0007186 // G-pr     |                                                                                      |
| NM_031379             |        | 0.038 |       |       |   |     | 1.03   | -1.04  | -1.08  | -1.15  | <i>Tktl1</i>            | transketolase-like 1                                                                    | 0008152 // metabolic process // inferred from electronic annotation                        |                                                                                      |
| NM_016875//XM_0033    |        |       | 0.033 |       |   |     | 1.11   | 1.02   | -1.08  | -1.12  | <i>Ybx2</i>             | Y box protein 2                                                                         | 0006355 // regulation of transcription, DNA-templated // inferred from electronic annot    |                                                                                      |
| NM_008911//XM_0037    |        |       | 0.037 |       |   |     | 1.08   | 1.04   | -1.08  | -1.00  | <i>Ppox</i>             | protoporphyrinogen oxidase                                                              | 0006779 // porphyrin-containing compound biosynthetic process // not recorded//0006        |                                                                                      |
| NM_009314             |        | 0.033 |       |       |   |     | 1.03   | -1.03  | -1.08  | -1.11  | <i>Tacr2</i>            | tachykinin receptor 2                                                                   | 0007165 // signal transduction // inferred from electronic annotation//0007166 // cell s   |                                                                                      |
| NM_0084               | 0.0474 |       |       |       |   |     | -1.08  | 1.02   | -1.08  | -1.12  | <i>Krt4</i>             | keratin 4                                                                               | 0007010 // cytoskeleton organization // not recorded//0009790 // embryo developmen         |                                                                                      |
| NM_0217               | 0.0358 |       |       |       |   |     | 1.06   | 1.23   | -1.08  | 1.15   | <i>Myg1</i>             | melanocyte proliferating gene 1                                                         | 0035641 // locomotory exploration behavior // inferred from mutant phenotype               |                                                                                      |
| NM_001177773//NM_0017 |        |       | 0.017 |       |   |     | -1.14  | -1.20  | -1.08  | -1.05  | <i>Fbxw7</i>            | F-box and WD-40 domain protein 7                                                        | 0001570 // vasculogenesis // inferred from mutant phenotype//0001944 // vasculature        |                                                                                      |
| NM_0274               | 0.0232 |       |       |       |   |     | 1.03   | -1.19  | -1.08  | 1.12   | <i>Zcchc8</i>           | zinc finger, CCHC domain containing 8                                                   | 0006397 // mRNA processing // inferred from electronic annotation//0008380 // RNA s        |                                                                                      |
| NM_1489               | 0.0441 |       |       |       |   |     | -1.06  | 1.02   | -1.08  | -1.21  | <i>Usp9y</i>            | ubiquitin specific peptidase 9, Y chromosome                                            | 0006508 // proteolysis // inferred from electronic annotation//0006511 // ubiquitin-dep    |                                                                                      |
| NM_0011               | 0.0171 |       |       |       |   |     | -1.00  | 1.10   | -1.08  | -1.12  | <i>Ppfia4</i>           | protein tyrosine phosphatase, receptor type, f polypeptide (PTPRF), interacting protein | (liprin), alpha 4                                                                          |                                                                                      |
| NM_001113408//        |        |       | 0.028 |       |   |     | 1.34   | 1.32   | -1.08  | 1.13   | <i>Ldb1</i>             | LIM domain binding 1                                                                    | 0000972 // transcription-dependent tethering of RNA polymerase II gene DNA at nuclear      |                                                                                      |
| NM_030890//XM_006524  |        |       | 0.003 |       |   |     | 1.03   | -1.06  | -1.08  | -1.14  | <i>Prrt1</i>            | proline-rich transmembrane protein 1                                                    | 0009607 // response to biotic stimulus // inferred from electronic annotation              |                                                                                      |
| NM_0269               | 0.0273 |       |       |       |   |     | 1.05   | -1.03  | -1.08  | 1.00   | <i>Snx15</i>            | sorting nexin 15                                                                        | 0006810 // transport // inferred from electronic annotation//0007165 // signal transduc    |                                                                                      |
| NM_001316710//NM_01   |        |       | 0.039 |       |   |     | 1.01   | -1.01  | -1.08  | -1.16  | <i>Gprin1</i>           | G protein-regulated inducer of neurite outgrowth 1                                      | 0031175 // neuron projection development // inferred from direct assay                     |                                                                                      |
| NM_001276298//NM_00   |        |       | 0.007 |       |   |     | 1.10   | 1.01   | -1.08  | -1.15  | <i>Avpr2</i>            | arginine vasopressin receptor 2                                                         | 0001992 // regulation of systemic arterial blood pressure by vasopressin // not recorded// |                                                                                      |
| NM_0285               | 0.0428 |       |       |       |   |     | -1.09  | 1.02   | -1.08  | -1.26  | <i>1700080E11Rik</i>    | RIKEN cDNA 1700080E11 gene                                                              | 0008152 // metabolic process // inferred from electronic annotation                        |                                                                                      |
| NM_001272024//NM_01   | #####  |       |       |       |   |     | 1.03   | 1.01   | -1.08  | -1.17  | <i>Sema6c</i>           | sema domain, transmembrane domain (TM), and cytoplasmic domain, (semaphorin) 6          | 0001755 // neural crest cell migration // not recorded//0007275 // multicellular organis   |                                                                                      |
| NM_0110               | 0.0235 |       |       |       |   |     | -1.09  | 1.07   | -1.08  | -1.13  | <i>Otp</i>              | orthopedia homolog (Drosophila)                                                         | 0002052 // positive regulation of neuroblast proliferation // inferred from mutant pheno   |                                                                                      |

| RefSeq       | Tri         | p 24h  | p 48h | p 72h | FD Air | FD 24h | FD 48h | FD 72h | Gene Symbol                  | Gene Title                                                                             | Gene Ontology Biological Process                                                          |
|--------------|-------------|--------|-------|-------|--------|--------|--------|--------|------------------------------|----------------------------------------------------------------------------------------|-------------------------------------------------------------------------------------------|
| NM_0012      |             | 0.0115 |       |       | 1.08   | -1.26  | -1.08  | 1.07   | <i>Bcl2l1</i>                | BCL2-like 1                                                                            | 0000910 // cytokinesis // not recorded//0001541 // ovarian follicle development // infer  |
| NM_0087      |             | 0.0499 |       |       | 1.05   | -1.41  | -1.08  | 1.01   | <i>Ogn</i>                   | osteoglycin                                                                            | 0018146 // keratan sulfate biosynthetic process // not recorded//0035385 // Roundab       |
| NM_0195      |             | 0.0176 |       | 0.022 | 1.10   | -1.08  | -1.08  | -1.16  | <i>Plac1</i>                 | placental specific protein 1                                                           | 0001890 // placenta development // inferred from expression pattern//0001890 // plac      |
| NM_0011      |             | 0.0024 |       |       | 1.21   | -1.06  | -1.08  | 1.10   | <i>Ngef</i>                  | neuronal guanine nucleotide exchange factor                                            | 0007275 // multicellular organismal development // inferred from electronic annotation/   |
| NM_0013      |             | 0.0485 | 0.041 |       | 1.02   | -1.08  | -1.08  | -1.06  | <i>Rab7b</i>                 | RAB7B, member RAS oncogene family                                                      | 0006810 // transport // inferred from electronic annotation//0006886 // intracellular pr  |
| NM_145746    | ///XM_00653 |        | 0.017 |       | 1.10   | -1.02  | -1.08  | -1.10  | <i>Odf4</i>                  | outer dense fiber of sperm tails 4                                                     | 0007275 // multicellular organismal development // inferred from electronic annotation/   |
| NM_001293630 | ///         | 0.014  |       |       | 1.13   | 1.08   | -1.08  | -1.01  | <i>Slc37a4</i>               | solute carrier family 37 (glucose-6-phosphate transporter), member 4                   | 0001780 // neutrophil homeostasis // inferred from mutant phenotype//0001816 // cyt       |
| NM_0012      |             | 0.0032 |       |       | 1.11   | 1.58   | -1.08  | 1.02   | <i>Cd37</i>                  | CD37 antigen                                                                           | 0002639 // positive regulation of immunoglobulin production // inferred from mutant ph    |
| NM_0010      | #####       |        |       |       | -1.02  | -1.40  | -1.08  | 1.12   | <i>Fam178a</i>               | family with sequence similarity 178, member A                                          | 0006281 // DNA repair // inferred from electronic annotation//0006974 // cellular resp    |
| NM_001267625 | ///NM_00    |        | 0.018 |       | 1.05   | -1.02  | -1.08  | -1.17  | <i>Dpf3</i>                  | D4, zinc and double PHD fingers, family 3                                              | 0002230 // positive regulation of defense response to virus by host // not recorded//000  |
| NM_0202      |             | 0.0171 |       |       | 1.06   | -1.14  | -1.08  | -1.18  | <i>Klk1b27</i>               | kallikrein 1-related peptidase b27                                                     | 0002526 // acute inflammatory response // ---//0003073 // regulation of systemic arteri   |
| NM_023910    | ///NM       |        | 0.005 |       | 1.14   | 1.15   | -1.08  | -1.24  | <i>Tsc22d4</i>               | TSC22 domain family, member 4                                                          | 0006351 // transcription, DNA-templated // inferred from electronic annotation//00063     |
| NM_0105      |             | 0.0483 |       |       | -1.03  | 1.29   | -1.08  | 1.28   | <i>Ifit3</i>                 | interferon-induced protein with tetratricopeptide repeats 3                            | 0002376 // immune system process // inferred from electronic annotation//0008285 //       |
| NM_1462      |             | 0.0251 |       |       | 1.04   | -1.26  | -1.08  | 1.04   | <i>Wdr78</i>                 | WD repeat domain 78                                                                    | 0002244 // hematopoietic progenitor cell differentiation // inferred from mutant phenoty  |
| NM_0012      |             | 0.0271 |       |       | -1.08  | 1.04   | -1.08  | -1.26  | <i>Wnk2</i>                  | WNK lysine deficient protein kinase 2                                                  | 0006468 // protein phosphorylation // inferred from direct assay//0006468 // protein p    |
| NM_026780    |             | 0.045  |       |       | 1.04   | -1.03  | -1.08  | 1.17   | <i>Syf2</i>                  | SYF2 homolog, RNA splicing factor (S. cerevisiae)                                      | 0000398 // mRNA splicing, via spliceosome // not recorded//0001701 // in utero embry      |
| NM_0231      |             | 0.0062 |       |       | 1.03   | -1.10  | -1.08  | -1.12  | <i>Ctrl</i>                  | chymotrypsin-like                                                                      | 0006508 // proteolysis // inferred from direct assay//0006508 // proteolysis // not recor |
|              |             | 0.021  |       |       | 1.19   | 1.04   | -1.08  | 1.02   | <i>D12Ert123e</i>            | DNA segment, Chr 12, ERATO Doi 123, expressed                                          |                                                                                           |
| NM_013730    | ///XM_00649 |        | 0.026 |       | 1.06   | 1.09   | -1.08  | -1.14  | <i>Slamf1</i>                | signaling lymphocytic activation molecule family member 1                              | 0001778 // natural killer cell differentiation // inferred from mutant phenotype//00017   |
| NM_028953    | ///XM_00652 |        | 0.048 |       | 1.03   | -1.02  | -1.08  | -1.17  | <i>Tmc1</i>                  | transmembrane channel-like gene family 1                                               | 0006810 // transport // inferred from electronic annotation//0006811 // ion transport /   |
| NM_013651    | ///XM       |        | 0.047 |       | 1.13   | 1.07   | -1.08  | -1.12  | <i>Sf3a2</i>                 | splicing factor 3a, subunit 2                                                          | 0002245 // spliceosome complex assembly // not recorded//0000375 // RNA splicing, v       |
| NM_0119      |             | 0.0361 | 0.009 |       | 1.12   | -1.05  | -1.08  | -1.14  | <i>Sema4g</i>                | sema domain, immunoglobulin domain (Ig), transmembrane domain (TM) and short cy        | 0001755 // neural crest cell migration // not recorded//0007275 // multicellular organis  |
| NM_019975    | ///XM       |        | 0.035 |       | 1.04   | -1.02  | -1.08  | -1.06  | <i>Hact1</i> ///Colg         | 2-hydroxyacyl-CoA lyase 1//collagen-like tail subunit (single strand of homotrimer) of | 0001561 // fatty acid alpha-oxidation // not recorded//0006629 // lipid metabolic proce   |
| NM_0120      |             | 0.0378 |       |       | 1.10   | -1.14  | -1.08  | -1.11  | <i>Ppnr</i>                  | per-pentamer repeat gene                                                               |                                                                                           |
| NM_0010      |             | 0.0255 |       |       | -1.01  | 1.35   | -1.08  | -1.10  | <i>Hvcn1</i>                 | hydrogen voltage-gated channel 1                                                       | 0006810 // transport // inferred from electronic annotation//0006811 // ion transport /   |
| NM_1531      |             | 0.009  |       |       | 1.03   | -1.10  | -1.08  | 1.10   | <i>Svil</i>                  | supervillin                                                                            | 0007010 // cytoskeleton organization // inferred from electronic annotation//0007519 /    |
| NM_007745    |             |        | 0.038 |       | 1.03   | 1.05   | -1.08  | -1.15  | <i>Cort</i>                  | cortistatin                                                                            | 0007193 // adenylate cyclase-inhibiting G-protein coupled receptor signaling pathway //   |
| NM_008429    | ///XM_00649 |        | 0.049 |       | 1.07   | -1.02  | -1.08  | -1.22  | <i>Kcnj9</i>                 | potassium inwardly-rectifying channel, subfamily J, member 9                           | 0006810 // transport // inferred from electronic annotation//0006811 // ion transport /   |
| NM_029938    |             | 0.028  |       |       | 1.09   | 1.01   | -1.08  | -1.10  | <i>H2afv</i>                 | H2A histone family, member V                                                           | 0006325 // chromatin organization // not recorded//0006342 // chromatin silencing // i    |
| NM_001037940 | ///         | 0.018  |       |       | 1.05   | -1.06  | -1.08  | 1.05   | <i>Dnajb6</i>                | Dnaj (Hsp40) homolog, subfamily B, member 6                                            | 0006457 // protein folding // not recorded//0030036 // actin cytoskeleton organization    |
| NM_001289507 | ///NM_00    |        | 0.029 |       | -1.02  | -1.04  | -1.08  | -1.24  | <i>Tjr2</i>                  | transferin receptor 2                                                                  | 0006879 // cellular iron ion homeostasis // traceable author statement//0006898 // rec    |
| NM_0266      |             | 0.0033 | 0.039 |       | 1.04   | -1.15  | -1.08  | 1.02   | <i>Rbm28</i>                 | RNA binding motif protein 28                                                           | 0006397 // mRNA processing // inferred from electronic annotation//0008380 // RNA sp      |
| NM_011134    | ///XM       |        | 0.022 |       | 1.12   | -1.05  | -1.08  | 1.29   | <i>Pon1</i>                  | paraoxonase 1                                                                          | 0006470 // protein dephosphorylation // ---//0006470 // protein dephosphorylation // i    |
| NM_025595    |             | 0.047  | 0.042 |       | 1.04   | -1.00  | -1.08  | -1.08  | <i>Mrp151</i>                | mitochondrial ribosomal protein L51                                                    | 0006412 // translation // inferred from direct assay//0032543 // mitochondrial translati  |
| NM_144919    | ///XM       |        | 0.014 |       | 1.11   | 1.07   | -1.08  | -1.02  | <i>Hdac11</i>                | histone deacetylase 11                                                                 | 0006351 // transcription, DNA-templated // inferred from electronic annotation//00063     |
| NM_015809    |             | 0.041  |       |       | 1.06   | 1.00   | -1.08  | -1.10  | <i>Krtap5-4</i>              | keratin associated protein 5-4                                                         |                                                                                           |
| NM_010030    |             |        | 0.005 |       | 1.02   | -1.02  | -1.08  | -1.21  | <i>Defb2</i>                 | defensin beta 2                                                                        | 0006952 // defense response // inferred from electronic annotation//0042742 // defens     |
| NM_001164607 | ///         | 0.034  |       |       | 1.04   | 1.07   | -1.08  | -1.10  | <i>Maf1</i>                  | MAF1 homolog (S. cerevisiae)                                                           | 0006351 // transcription, DNA-templated // inferred from electronic annotation//00063     |
| NM_0093      |             | 0.0466 |       |       | -1.05  | -1.48  | -1.08  | 1.04   | <i>Thbd</i>                  | thrombomodulin                                                                         | 0007165 // signal transduction // inferred from electronic annotation//0007565 // fema    |
| NM_145479    | ///XM       |        | 0.02  |       | 1.03   | -1.05  | -1.08  | -1.07  | <i>Klhl22</i>                | kelch-like 22                                                                          | 0000070 // mitotic sister chromatid segregation // not recorded//0006513 // protein m     |
| NM_001278581 | ///NM_00    |        | 0.038 |       | 1.06   | 1.07   | -1.08  | -1.13  | <i>Pomc</i>                  | pro-opiomelanocortin-alpha                                                             | 0006091 // generation of precursor metabolites and energy // not recorded//0007165 /      |
| NM_019663    | ///XM       |        | 0.023 |       | 1.11   | -1.01  | -1.08  | 1.16   | <i>Pias1</i>                 | protein inhibitor of activated STAT 1                                                  | 0000082 // G1/S transition of mitotic cell cycle // not recorded//0000122 // negative re  |
| NM_148953    |             |        | 0.019 |       | 1.03   | -1.01  | -1.07  | -1.14  | <i>Asb16</i>                 | ankyrin repeat and SOCS box-containing 16                                              | 0016567 // protein ubiquitination // inferred from electronic annotation//0035556 // in   |
| NM_0011      |             | 0.0428 |       |       | 1.09   | -1.07  | -1.07  | -1.10  | <i>Dctn1</i>                 | dynactin 1                                                                             | 0006810 // transport // inferred from electronic annotation//0008152 // metabolic pro     |
| NM_019701    | ///XM_00653 |        | 0.04  |       | -1.01  | 1.03   | -1.07  | -1.20  | <i>Clnkb</i>                 | chloride channel, voltage-sensitive Kb                                                 | 0006810 // transport // inferred from electronic annotation//0006811 // ion transport /   |
| NM_145564    | ///XM       |        | 0.008 | 0.046 | 1.12   | 1.03   | -1.07  | -1.03  | <i>Fbxo21</i>                | F-box protein 21                                                                       |                                                                                           |
| NM_001013360 | ///         | 0.014  |       |       | 1.02   | -1.01  | -1.07  | -1.10  | <i>Npcd</i> ///Nptxr         | neuronal pentraxin chromo domain//neuronal pentraxin receptor                          | 0000122 // negative regulation of transcription from RNA polymerase II promoter // infer  |
| NM_009620    |             |        | 0.038 |       | 1.05   | 1.00   | -1.07  | -1.06  | <i>Adam4</i>                 | a disintegrin and metallopeptidase domain 4                                            | 0006508 // proteolysis // inferred from electronic annotation//0007229 // integrin-med    |
| NM_001040136 | ///NM_00    |        | 0.049 |       | -1.01  | -1.02  | -1.07  | -1.16  | <i>Pdzd9</i>                 | PDZ domain containing 9                                                                |                                                                                           |
| XM_9935      |             | 0.0102 |       |       | 1.07   | 1.20   | -1.07  | -1.16  | <i>LOC672450</i> ///Ilgk-V21 | V(kappa) gene product//immunoglobulin kappa chain variable 21 (V21)//immunogl          | 0006898 // receptor-mediated endocytosis // not recorded//0006910 // phagocytosis, r      |
| NM_009438    | ///NM_01352 |        | 0.047 |       | -1.01  | 1.04   | -1.07  | -1.05  | <i>Rpl13a</i> ///Ftl3        | ribosomal protein L13A//FMS-like tyrosine kinase 3 ligand//60S ribosomal protein L1    | 0006412 // translation // inferred from electronic annotation//0006417 // regulation of   |
| NM_025414    | ///XM_00653 |        | 0.013 |       | -1.09  | -1.04  | -1.07  | 1.05   | <i>Myo19</i>                 | myosin XIX                                                                             | 0008152 // metabolic process // inferred from electronic annotation//0034642 // mitoc     |
| NM_001159520 | ///NM_00    |        | 0.002 |       | -1.00  | -1.03  | -1.07  | -1.18  | <i>Pax3</i>                  | paired box 3                                                                           | 0000122 // negative regulation of transcription from RNA polymerase II promoter // infer  |
| NM_0264      |             | 0.0431 |       |       | -1.16  | -1.07  | -1.07  | -1.14  | <i>Mtjp1</i>                 | mitochondrial fission process 1                                                        | 0000266 // mitochondrial fission // not recorded//0006915 // apoptotic process // infer   |
| NM_134000    | ///XM       |        | 0.005 | 0.004 | 1.10   | 1.11   | -1.07  | -1.08  | <i>Traf3ip2</i>              | TRAF3 interacting protein 2                                                            | 0001783 // B cell apoptotic process // inferred from mutant phenotype//0002230 // po      |
| NM_0265      |             | 0.0233 |       |       | 1.16   | -1.06  | -1.07  | -1.09  | <i>Bambi</i>                 | BMP and activin membrane-bound inhibitor                                               | 0007179 // transforming growth factor beta receptor signaling pathway // not recorded,    |
| NM_0120      |             | 0.0346 |       |       | -1.04  | 1.08   | -1.07  | -1.14  | <i>Pla2g2e</i>               | phospholipase A2, group IIE                                                            | 0006629 // lipid metabolic process // inferred from electronic annotation//0006644 // p   |
| NM_001166642 | ///         | 0.042  |       |       | 1.10   | -1.01  | -1.07  | -1.01  | <i>Bcas3</i>                 | breast carcinoma amplified sequence 3                                                  | 0001525 // angiogenesis // inferred from electronic annotation//0006351 // transcrip      |
| NM_0011      |             | 0.034  |       |       | 1.02   | -1.05  | -1.07  | -1.04  | <i>Prph</i>                  | peripherin                                                                             | 0045104 // intermediate filament cytoskeleton organization // inferred from direct assay, |
| NM_1308      |             | 0.0147 | 0.002 |       | 1.05   | -1.03  | -1.07  | -1.06  | <i>Nxph3</i>                 | neurexophilin 3                                                                        |                                                                                           |
| NM_0012      |             | 0.0273 |       |       | 1.03   | -1.14  | -1.07  | -1.02  | <i>Pbx1</i>                  | pre B cell leukemia homeobox 1                                                         | 0001655 // urogenital system development // inferred from mutant phenotype//00016         |
| NM_1341      |             | 0.0311 |       | 0.048 | -1.05  | 1.15   | -1.07  | 1.07   | <i>Pla1a</i>                 | phospholipase A1 member A                                                              | 0006629 // lipid metabolic process // inferred from electronic annotation//0016042 // li  |
| NM_001289729 | ///NM_13    |        | 0.028 |       | -1.01  | -1.14  | -1.07  | -1.16  | <i>Xpnpep2</i>               | X-prolyl aminopeptidase (aminopeptidase P) 2, membrane-bound                           | 0006508 // proteolysis // inferred from electronic annotation//0008152 // metabolic pr    |
| NM_0010      |             | 0.0472 |       |       | 1.05   | -1.05  | -1.07  | -1.24  | <i>Cdc102a</i>               | coiled-coil domain containing 102A                                                     | 0008152 // metabolic process // inferred from electronic annotation                       |

| RefSeq       | Tri          | p 24h | p 48h | p 72h | FD Air | FD 24h | FD 48h | FD 72h | Gene Symbol                                      | Gene Title                                                                                    | Gene Ontology Biological Process                                                            |
|--------------|--------------|-------|-------|-------|--------|--------|--------|--------|--------------------------------------------------|-----------------------------------------------------------------------------------------------|---------------------------------------------------------------------------------------------|
| NM_023697    | ///XM        | 0.025 |       |       | 1.03   | -1.06  | -1.07  | -1.09  | <b>Rdh14</b>                                     | retinol dehydrogenase 14 (all-trans and 9-cis)                                                | 0001649 // osteoblast differentiation // not recorded///0008152 // metabolic process //     |
| NM_0113      | 0.0314       |       |       |       | 1.06   | -1.15  | -1.07  | 1.26   | <b>Scnn1a</b>                                    | sodium channel, nonvoltage-gated 1 alpha                                                      | 0006810 // transport // inferred from electronic annotation///0006811 // ion transport //   |
| NM_145940    |              | 0.044 |       |       | 1.02   | -1.03  | -1.07  | 1.02   | <b>Wipi1</b>                                     | WD repeat domain, phosphoinositide interacting 1                                              | 0000045 // autophagosome assembly // not recorded///0000422 // mitophagy // not rec         |
| NM_029624    | ///NR_045520 | 0.031 |       |       | -1.03  | 1.03   | -1.07  | 1.13   | <b>Lmf1</b>                                      | lipase maturation factor 1                                                                    | 0006888 // ER to Golgi vesicle-mediated transport // inferred from mutant phenotype///      |
| NM_0011      | 0.0117       |       |       |       | -1.01  | 1.09   | -1.07  | -1.12  | <b>Dbn1</b>                                      | drebrin 1                                                                                     | 0007015 // actin filament organization // inferred from direct assay///0007275 // multic    |
| NM_0011      | 0.0487       |       |       |       | -1.03  | -1.32  | -1.07  | 1.06   | <b>Lpin1</b>                                     | lipin 1                                                                                       | 0000122 // negative regulation of transcription from RNA polymerase II promoter // infer    |
| NM_138655    |              | 0.043 |       |       | 1.02   | -1.01  | -1.07  | -1.12  | <b>Tmc2</b>                                      | transmembrane channel-like gene family 2                                                      | 0006810 // transport // inferred from electronic annotation///0006811 // ion transport //   |
| NM_144523    |              | 0.02  |       |       | -1.01  | -1.03  | -1.07  | -1.22  | <b>Zfp622</b>                                    | zinc finger protein 622                                                                       | 0008631 // intrinsic apoptotic signaling pathway in response to oxidative stress // not rec |
| NM_148938    |              |       | 0.031 |       | 1.08   | -1.04  | -1.07  | 1.04   | <b>Slc1a3</b>                                    | solute carrier family 1 (glial high affinity glutamate transporter), member 3                 | 0002230 // positive regulation of defense response to virus by host // not recorded///000   |
| NM_1455      | 0.0162       | 0.009 |       |       | 1.03   | -1.21  | -1.07  | 1.03   | <b>Tmem159</b>                                   | transmembrane protein 159                                                                     |                                                                                             |
| NM_0111      | 0.0488       |       |       |       | -1.03  | 1.27   | -1.07  | -1.04  | <b>Pstpip1</b>                                   | proline-serine-threonine phosphatase-interacting protein 1                                    | 0000910 // cytokinesis // inferred by curator///0002376 // immune system process // inf     |
| NM_008803    |              | 0.009 |       |       | 1.11   | -1.06  | -1.07  | 1.11   | <b>Pde8a</b>                                     | phosphodiesterase 8A                                                                          | 0006198 // cAMP catabolic process // inferred from electronic annotation///0006355 // i     |
| NM_0088      | 0.0328       |       |       |       | 1.11   | -1.06  | -1.07  | 1.11   | <b>Pde8a</b>                                     | phosphodiesterase 8A                                                                          | 0006198 // cAMP catabolic process // inferred from electronic annotation///0006355 // i     |
| NM_0294      | 0.0159       |       |       |       | -1.05  | 1.09   | -1.07  | -1.03  | <b>Epsti1</b>                                    | epithelial stromal interaction 1 (breast)                                                     |                                                                                             |
| NM_1528      | 0.025        | 0.003 |       |       | 1.11   | -1.04  | -1.07  | 1.05   | <b>Ccdc137</b>                                   | coiled-coil domain containing 137                                                             |                                                                                             |
| NM_0168      | 0.0478       |       |       |       | -1.12  | 1.03   | -1.07  | -1.14  | <b>Avpr1a</b>                                    | arginine vasopressin receptor 1A                                                              | 0001992 // regulation of systemic arterial blood pressure by vasopressin // inferred from   |
| NM_011973    | ///XM_006515 | 0.018 |       |       | 1.03   | 1.03   | -1.07  | -1.12  | <b>Mok</b>                                       | MOK protein kinase                                                                            | 0006468 // protein phosphorylation // inferred from electronic annotation///0016310 //      |
| NM_024230    | ///XM_006500 | 0.04  |       |       | 1.06   | -1.08  | -1.07  | -1.23  | <b>Smtnl1</b>                                    | smoothelin-like 1                                                                             | 0014823 // response to activity // inferred from mutant phenotype///0018105 // peptid       |
| NM_0013      | 0.0339       |       |       |       | -1.03  | -1.18  | -1.07  | 1.15   | <b>Nek7</b>                                      | NIMA (never in mitosis gene a)-related expressed kinase 7                                     | 0006468 // protein phosphorylation // not recorded///0016310 // phosphorylation // inf      |
| NM_0299      | 0.0435       |       |       |       | -1.08  | -1.02  | -1.07  | -1.10  | <b>Sla2</b>                                      | Src-like-adapter 2                                                                            | 0000122 // negative regulation of transcription from RNA polymerase II promoter // not r    |
| NM_0198      | 0.0114       |       |       |       | -1.03  | 1.20   | -1.07  | 1.03   | <b>Gsk3b</b>                                     | glycogen synthase kinase 3 beta                                                               | 0000320 // re-entry into mitotic cell cycle // inferred from direct assay///0001837 // epit |
| NM_001130419 | ///          | 0.022 | 0.003 |       | 1.15   | -1.03  | -1.07  | -1.24  | <b>Hpca</b>                                      | hippocalcin                                                                                   | 0007420 // brain development // inferred from electronic annotation///0010518 // posit      |
| NM_007811    |              |       | 0.014 |       | -1.04  | 1.01   | -1.07  | -1.24  | <b>Cyp26a1</b>                                   | cytochrome P450, family 26, subfamily a, polypeptide 1                                        | 0007417 // central nervous system development // inferred from genetic interaction///0      |
| NM_008899    |              | 0.047 |       |       | 1.04   | -1.03  | -1.07  | -1.07  | <b>Pou3f2</b>                                    | POU domain, class 3, transcription factor 2                                                   | 0006351 // transcription, DNA-templated // inferred from electronic annotation///00063      |
| NM_030714    | ///XM        | 0.045 |       |       | 1.15   | 1.02   | -1.07  | 1.22   | <b>Dtx3</b>                                      | deltex 3 homolog (Drosophila)                                                                 | 0007219 // Notch signaling pathway // inferred from direct assay///0007219 // Notch sig     |
| NM_0220      | #####        |       |       |       | -1.01  | 1.14   | -1.07  | 1.05   | <b>Dusp10</b>                                    | dual specificity phosphatase 10                                                               | 0000188 // inactivation of MAPK activity // not recorded///0002819 // regulation of ada     |
| NM_0264      | 0.0339       |       |       |       | -1.05  | 1.07   | -1.07  | -1.01  | <b>Coq9</b>                                      | coenzyme Q9 homolog (yeast)                                                                   | 0006120 // mitochondrial electron transport, NADH to ubiquinone // inferred from muta       |
| NM_1789      | 0.0449       |       |       |       | -1.04  | -1.36  | -1.07  | 1.05   | <b>Mal2</b>                                      | mal, T cell differentiation protein 2                                                         |                                                                                             |
| NM_1813      | 0.0082       |       | 0.021 |       | 1.09   | -1.10  | -1.07  | -1.15  | <b>Cwh43</b>                                     | cell wall biogenesis 43 C-terminal homolog (S. cerevisiae)                                    | 0006506 // GPI anchor biosynthetic process // inferred from electronic annotation           |
| NM_1980      | #####        |       |       |       | 1.04   | -1.08  | -1.07  | -1.15  | <b>Tnrc6c</b>                                    | trinucleotide repeat containing 6C                                                            | 0001706 // endoderm formation // inferred from mutant phenotype///0006417 // regula         |
| NM_001313928 | ///NM_00     | 0.009 |       |       | -1.02  | 1.01   | -1.07  | -1.15  | <b>Crrh1</b>                                     | corticotropin releasing hormone receptor 1                                                    | 0001666 // response to hypoxia // not recorded///0007165 // signal transduction // infer    |
| NM_0260      | 0.0489       |       |       |       | 1.01   | -1.12  | -1.07  | -1.02  | <b>Gemin6</b>                                    | gem (nuclear organelle) associated protein 6                                                  | 0000245 // spliceosomal complex assembly // inferred from electronic annotation///000       |
| NM_144867    | ///XM_006525 | 0.038 |       |       | -1.03  | -1.03  | -1.07  | -1.14  | <b>Simo1</b>                                     | slowmo homolog 1 (Drosophila)                                                                 | 0015914 // phospholipid transport // not recorded///1903955 // positive regulation of pi    |
| NM_033146    | ///XM        | 0.007 | 0.024 |       | 1.16   | 1.11   | -1.07  | -1.21  | <b>Emc9</b>                                      | ER membrane protein complex subunit 9                                                         |                                                                                             |
| NM_0085      | 0.0453       |       |       |       | -1.01  | 1.06   | -1.07  | -1.19  | <b>Mageb1</b> /// <b>Mage2</b> /// <b>Mageb3</b> | melanoma antigen, family B, 1///melanoma antigen, family B, 2///melanoma antigen, family B, 3 | 0006750 // glutathione biosynthetic process // inferred from electronic annotation///001    |
| NM_001039509 | ///NM_01     | 0.007 |       |       | 1.06   | -1.11  | -1.07  | -1.12  | <b>Pnk4</b>                                      | paroxysmal nonkinesinogenic dyskinesia                                                        | 0001889 // liver development // inferred from electronic annotation///0006139 // nuclei     |
| NM_0011      | 0.0471       |       | 0.023 |       | 1.03   | -1.07  | -1.07  | -1.13  | <b>Ak4</b>                                       | adenylate kinase 4                                                                            | 0006464 // cellular protein modification process // inferred from electronic annotation///  |
| NM_0116      | 0.0261       |       |       |       | -1.04  | -1.11  | -1.07  | -1.06  | <b>Uba1y</b>                                     | ubiquitin-activating enzyme, Chr Y                                                            | 0006006 // glucose metabolic process // inferred from electronic annotation///0006915       |
| NM_0226      | 0.0035       | 0.008 |       |       | 1.06   | -1.09  | -1.07  | -1.08  | <b>Nisch</b>                                     | nischarin                                                                                     | 0098734 // macromolecule depalmitoylation // not recorded                                   |
| NM_001302393 | ///          | 0.039 |       |       | 1.04   | -1.02  | -1.07  | 1.02   | <b>Ppt2</b>                                      | palmitoyl-protein thioesterase 2                                                              | 0007017 // microtubule-based process // inferred from physical interaction///0008104 //     |
| NM_0013      | 0.0275       |       |       |       | 1.02   | -1.11  | -1.07  | 1.05   | <b>Kifap3</b>                                    | kinesin-associated protein 3                                                                  | 0007155 // cell adhesion // inferred from electronic annotation///0032225 // regulati       |
| NM_1304      | 0.0145       |       |       |       | 1.05   | -1.14  | -1.07  | -1.06  | <b>Cntnap4</b>                                   | contactin associated protein-like 4                                                           | 0001782 // B cell homeostasis // inferred from mutant phenotype///0002250 // adaptiv        |
| NM_0010      | 0.0119       |       |       |       | -1.06  | 1.10   | -1.07  | -1.10  | <b>Pik3cd</b>                                    | phosphatidylinositol 3-kinase catalytic delta polypeptide                                     | 0007275 // multicellular organismal development // inferred from electronic annotation/     |
| NM_007792    |              | 0.02  |       |       | -1.02  | -1.12  | -1.06  | 1.10   | <b>Csrp2</b>                                     | cysteine and glycine-rich protein 2                                                           | 0001774 // microglial cell activation // not recorded///0002052 // positive regulation of r |
| NM_0099      | 0.032        |       |       |       | -1.03  | 1.15   | -1.06  | -1.04  | <b>Cx3cr1</b>                                    | chemokine (C-X3-C motif) receptor 1                                                           | 1902042 // negative regulation of extrinsic apoptotic signaling pathway via death domain    |
| NM_0013      | 0.0033       |       |       |       | 1.02   | -1.15  | -1.06  | 1.01   | <b>Tnfrsf23</b>                                  | tumor necrosis factor receptor superfamily, member 23                                         | 0006120 // mitochondrial electron transport, NADH to ubiquinone // inferred from electr     |
| NM_0242      | 0.035        |       |       |       | 1.02   | -1.07  | -1.06  | 1.05   | <b>LOC102641347</b> /// <b>Ndufc2</b>            | NADH dehydrogenase [ubiquinone] 1 subunit C2///NADH dehydrogenase (ubiquinone                 | 0007031 // peroxisome organization // not recorded///0007165 // signal transduction //      |
| NM_0110      | 0.0314       |       |       |       | -1.00  | -1.31  | -1.06  | 1.02   | <b>Pex11a</b>                                    | peroxisomal biogenesis factor 11 alpha                                                        | 1901386 // negative regulation of voltage-gated calcium channel activity // not recorded    |
| NM_0011      | 0.0477       |       |       |       | 1.17   | -1.00  | -1.06  | -1.02  | <b>Charp</b>                                     | calcium channel, voltage-dependent, beta subunit associated regulatory protein                | 0001207 // histone displacement // inferred from mutant phenotype///0006338 // chr          |
| NM_0010      | 0.0339       |       |       |       | -1.05  | 1.12   | -1.06  | -1.10  | <b>Brdt</b>                                      | bromodomain, testis-specific                                                                  | 0006629 // lipid metabolic process // inferred from electronic annotation///0006694 // s    |
| NM_0532      | 0.01         | 0.008 |       |       | 1.13   | -1.02  | -1.06  | 1.12   | <b>Hsd17b11</b>                                  | hydroxysteroid (17-beta) dehydrogenase 11                                                     |                                                                                             |
| NM_023816    | ///XM_006514 | 0.045 |       |       | 1.09   | -1.04  | -1.06  | -1.11  | <b>Ankrd36</b>                                   | ankyrin repeat domain 36                                                                      | 0006810 // transport // inferred from electronic annotation///0007165 // signal transdu     |
| NM_0010      | 0.0251       | 0.04  |       |       | 1.07   | -1.14  | -1.06  | 1.02   | <b>Agap1</b>                                     | ArfGAP with GTPase domain, ankyrin repeat and PH domain 1                                     | 0006952 // defense response // inferred from electronic annotation                          |
| NM_0011      | 0.021        | 0.045 |       |       | 1.35   | -1.10  | -1.06  | -1.13  | <b>Ankrd33b</b>                                  | ankyrin repeat domain 33B                                                                     | 0002244 // hematopoietic progenitor cell differentiation // inferred from genetic interact  |
| NM_007845    |              | 0.034 |       |       | -1.05  | 1.02   | -1.06  | -1.10  | <b>Defa-rs10</b>                                 | defensin, alpha, related sequence 10                                                          | 0006468 // protein phosphorylation // not recorded///0019835 // cytolysis // inferred fr    |
| NM_001146021 | ///NM_02     | 0.016 |       |       | 1.02   | 1.03   | -1.06  | -1.22  | <b>Lrrc18</b>                                    | leucine rich repeat containing 18                                                             | 0007017 // microtubule-based process // inferred from electronic annotation///0008152       |
| NM_0012      | 0.0427       |       |       |       | -1.08  | 1.05   | -1.06  | -1.14  | <b>Kcnab2</b>                                    | potassium voltage-gated channel, shaker-related subfamily, beta member 2                      | 0002244 // hematopoietic progenitor cell differentiation // inferred from genetic interact  |
| NM_175217    | ///XM_006504 | 0.032 |       |       | 1.03   | -1.09  | -1.06  | -1.18  | <b>Mmd2</b>                                      | monocyte to macrophage differentiation-associated 2                                           | 0006468 // protein phosphorylation // not recorded///0019835 // cytolysis // inferred fr    |
| NM_0013      | 0.0433       |       |       |       | -1.17  | 1.05   | -1.06  | -1.05  | <b>Tuba4a</b>                                    | tubulin, alpha 4A                                                                             | 0007017 // microtubule-based process // inferred from electronic annotation///0008152       |
| NM_028658    |              | 0.03  | 0.031 |       | 1.02   | -1.06  | -1.06  | -1.06  | <b>Ppp1r21</b>                                   | protein phosphatase 1, regulatory subunit 21                                                  | 0000165 // MAPK cascade // inferred from electronic annotation///0000186 // activator       |
| NM_1456      | 0.0285       |       |       |       | -1.04  | -1.11  | -1.06  | -1.15  | <b>BC021891</b>                                  | cDNA sequence BC021891                                                                        |                                                                                             |
| NM_144872    | ///XM        | 0.019 |       |       | 1.19   | 1.39   | -1.06  | 1.26   | <b>Eml3</b>                                      | echinoderm microtubule associated protein like 3                                              | 0006749 // glutathione metabolic process // not recorded///0008152 // metabolic proce       |
| NM_0103      | 0.0226       |       |       |       | 1.00   | -1.08  | -1.06  | 1.22   | <b>Gstm1</b>                                     | glutathione S-transferase, mu 1                                                               | 0000060 // protein import into nucleus, translocation // inferred from direct assay///000   |
| NM_0109      | 0.0336       | 0.043 |       |       | 1.08   | -1.15  | -1.06  | -1.17  | <b>Nfkbia</b>                                    | nuclear factor of kappa light polypeptide gene enhancer in B cells inhibitor, alpha           |                                                                                             |

| RefSeq       | Tri      | p 24h   | p 48h | p 72h | FD Air | FD 24h | FD 48h | FD 72h | Gene Symbol                   | Gene Title                                                                                     | Gene Ontology Biological Process                                                          |
|--------------|----------|---------|-------|-------|--------|--------|--------|--------|-------------------------------|------------------------------------------------------------------------------------------------|-------------------------------------------------------------------------------------------|
| NM_013811    | ///XM    | 0.017   |       |       | 1.14   | 1.05   | -1.06  | -1.04  | <i>Dnah8</i>                  | dynein, axonemal, heavy chain 8                                                                | 0007018 // microtubule-based movement // inferred from electronic annotation//0008:       |
| NM_0010      | 0.0207   |         |       |       | 1.09   | -1.14  | -1.06  | -1.08  | <i>Car1</i>                   | carbonic anhydrase 1                                                                           | 0006730 // one-carbon metabolic process // inferred from electronic annotation            |
| NM_0198      | 0.0223   |         |       |       | 1.01   | -1.13  | -1.06  | -1.18  | <i>Copz2</i>                  | coatomer protein complex, subunit zeta 2                                                       | 0006810 // transport // inferred from electronic annotation//0015031 // protein transp    |
| NM_0089      | 0.0155   |         |       |       | 1.03   | -1.25  | -1.06  | 1.33   | <i>Ptrf</i>                   | polymerase I and transcript release factor                                                     | 0006351 // transcription, DNA-templated // inferred from electronic annotation//00063     |
| NM_1340      | 0.0023   |         |       |       | 1.09   | -1.14  | -1.06  | -1.04  | <i>Chmp7</i>                  | charged multivesicular body protein 7                                                          | 0000920 // cell separation after cytokinesis // not recorded//0006810 // transport // inf |
| NM_0158      | 0.0157   |         |       |       | 1.04   | -1.15  | -1.06  | -1.11  | <i>Capn15</i>                 | calpain 15                                                                                     | 0006508 // proteolysis // not recorded                                                    |
| NM_0013      | 0.0351   |         |       |       | 1.07   | -1.15  | -1.06  | -1.04  | <i>Zfp423</i>                 | zinc finger protein 423                                                                        | 0006351 // transcription, DNA-templated // inferred from electronic annotation//00063     |
| NM_001033499 | ///      | 0.015   |       |       | 1.06   | 1.09   | -1.06  | 1.07   | <i>Sh2d1b1///Sh2d1b2</i>      | SH2 domain containing 1B1//SH2 domain containing 1B2                                           | 0002366 // leukocyte activation involved in immune response // inferred from direct ass   |
| NM_009855    | ///XM    | 0.0652  | 0.015 |       | -1.05  | -1.05  | -1.06  | -1.22  | <i>Cd80</i>                   | CD80 antigen                                                                                   | 0031295 // T cell costimulation // inferred from direct assay//0042102 // positive regula |
| NM_0013      | 0.0459   |         |       |       | 1.09   | -1.05  | -1.06  | -1.03  | <i>Slc27a3</i>                | solute carrier family 27 (fatty acid transporter), member 3                                    | 0001676 // long-chain fatty acid metabolic process // traceable author statement//0006    |
| NM_0220      | 0.0354   |         |       |       | -1.08  | 1.05   | -1.06  | -1.09  | <i>Ube4b</i>                  | ubiquitination factor E4B                                                                      | 0000209 // protein polyubiquitination // inferred from direct assay//0000209 // protein   |
| NM_0282      | 0.0261   | 0.027   |       |       | 1.08   | -1.06  | -1.06  | 1.07   | <i>Sgol1</i>                  | shugoshin-like 1 (S. pombe)                                                                    | 0007049 // cell cycle // inferred from electronic annotation//0007059 // chromosome s     |
| NM_0011      | 0.0479   |         |       |       | 1.03   | -1.08  | -1.06  | -1.12  | <i>Smax</i>                   | spermine oxidase                                                                               | 0006598 // polyamine catabolic process // not recorded//0046208 // spermine cataboli      |
| NM_013774    | ///XM    | 0.0651  | 0.036 |       | 1.05   | 1.01   | -1.06  | -1.05  | <i>Tcl1b4</i>                 | T cell leukemia/lymphoma 1B, 4                                                                 |                                                                                           |
| NM_030262    | ///XR    | 380457  | 0.046 |       | -1.13  | -1.12  | -1.06  | 1.07   | <i>Pofut2</i>                 | protein O-fucosyltransferase 2                                                                 | 0001707 // mesoderm formation // inferred from mutant phenotype//0005975 // carb          |
| NM_008474    | ///XM    | 0.0652  | 0.036 |       | -1.06  | -1.06  | -1.06  | -1.32  | <i>Krt84</i>                  | keratin 84                                                                                     | 0045616 // regulation of keratinocyte differentiation // inferred from direct assay       |
| NM_011723    | ///XM    | #####   |       |       | 1.18   | 1.03   | -1.06  | 1.31   | <i>Xdh///Cwc22</i>            | xanthine dehydrogenase//CWC22 spliceosome-associated protein homolog (S. cerevi                | 0001933 // negative regulation of protein phosphorylation // not recorded//0001937 //     |
| NM_145926    |          | 0.05    |       |       | 1.16   | 1.13   | -1.06  | -1.16  | <i>Mgat4b</i>                 | mannoside acetylglucosaminyltransferase 4, isoenzyme B                                         | 0005975 // carbohydrate metabolic process // inferred from electronic annotation//000     |
| NM_1818      | 0.0451   |         |       |       | -1.01  | -1.12  | -1.06  | 1.01   | <i>Hcfc1r1</i>                | host cell factor C1 regulator 1 (XPO1-dependent)                                               |                                                                                           |
| NM_001038700 | ///      | 0.032   |       |       | 1.08   | 1.05   | -1.06  | 1.01   | <i>Fnbp1</i>                  | formin binding protein 1                                                                       | 0006897 // endocytosis // inferred from electronic annotation//0007399 // nervous syst    |
| NM_0076      | 0.0133   |         |       |       | 1.06   | 1.29   | -1.06  | -1.15  | <i>Cdkn2b</i>                 | cyclin-dependent kinase inhibitor 2B (p15, inhibits CDK4)                                      | 0000079 // regulation of cyclin-dependent protein serine/threonine kinase activity // not |
| NM_001204129 | ///NM_00 | 0.01    |       |       | 1.03   | -1.04  | -1.06  | -1.09  | <i>C1qtnf1</i>                | C1q and tumor necrosis factor related protein 1                                                | 0007204 // positive regulation of cytosolic calcium ion concentration // not recorded//0  |
| NM_0087      | 0.0395   | 0.007   |       |       | 1.04   | -1.08  | -1.06  | -1.18  | <i>Dusp8</i>                  | dual specificity phosphatase 8                                                                 | 0000188 // inactivation of MAPK activity // inferred from electronic annotation//00064    |
| NM_133351    | ///XM    | 0.017   |       |       | 1.14   | 1.15   | -1.06  | 1.19   | <i>Prss8</i>                  | protease, serine 8 (prostasin)                                                                 | 0001942 // hair follicle development // inferred from mutant phenotype//0006508 // pr     |
| NM_023377    |          | 0.008   |       |       | -1.02  | -1.10  | -1.06  | 1.12   | <i>Stard5</i>                 | STAR-related lipid transfer (START) domain containing 5                                        | 0006810 // transport // inferred from electronic annotation//0006869 // lipid transport,  |
| NM_022411    | ///XM    | 0.0653  | 0.036 |       | 1.03   | 1.02   | -1.06  | -1.15  | <i>Slc13a2</i>                | solute carrier family 13 (sodium-dependent dicarboxylate transporter), member 2                | 0006810 // transport // inferred from electronic annotation//0006811 // ion transport /   |
| NM_1727      | 0.0305   | 0.007   |       |       | 1.22   | 1.10   | -1.06  | 1.05   | <i>Lang8</i>                  | leukocyte receptor cluster (LRC) member 8                                                      |                                                                                           |
| NM_1393      | 0.0409   | 0.048   |       |       | 1.11   | -1.02  | -1.06  | -1.02  | <i>Mllt6</i>                  | myeloid/lymphoid or mixed-lineage leukemia (trithorax homolog, Drosophila); translocated to, 6 | 0007165 // signal transduction // inferred from electronic annotation                     |
| NM_0166      | 0.0303   | 0.013   |       |       | 1.11   | -1.03  | -1.06  | -1.04  | <i>Hpcal1</i>                 | hippocalcin-like 1                                                                             | 0001881 // receptor recycling // inferred from mutant phenotype//0007173 // epiderm:      |
| NM_0075      | 0.0125   | 0.022   |       |       | 1.06   | -1.05  | -1.06  | -1.03  | <i>Cam1</i>                   | calcium modulating ligand                                                                      | 0006629 // lipid metabolic process // inferred from electronic annotation//0006694 // s   |
| NM_0013      | 0.0126   |         |       |       | 1.11   | -1.08  | -1.06  | -1.16  | <i>Fdx1</i>                   | ferredoxin 1                                                                                   | 0007165 // signal transduction // inferred from electronic annotation//0007166 // cell s  |
| NM_0086      | 0.0066   |         |       |       | 1.04   | -1.09  | -1.06  | -1.01  | <i>Mtnr1a</i>                 | melatonin receptor 1A                                                                          | 0006629 // lipid metabolic process // inferred from electronic annotation//0006631 // f.  |
| NM_153807    | ///XR    | 0.034   |       |       | 1.09   | 1.04   | -1.06  | 1.12   | <i>Acsf2</i>                  | acyl-CoA synthetase family member 2                                                            | 0006955 // immune response // inferred from electronic annotation//0008152 // metab       |
| NM_001159934 | ///NM_14 | 0.024   |       |       | 1.12   | -1.04  | -1.06  | -1.12  | <i>Oas1h</i>                  | 2'-5' oligoadenylate synthetase 1H                                                             | 0006468 // protein phosphorylation // not recorded//0006979 // response to oxidativ       |
| NM_133985    | ///NR    | 0.45693 | 0.045 |       | -1.08  | -1.15  | -1.06  | 1.12   | <i>Oxsr1</i>                  | oxidative-stress responsive 1                                                                  | 0006629 // lipid metabolic process // inferred from electronic annotation                 |
| NM_0188      | 0.008    | 0.011   |       |       | 1.25   | -1.04  | -1.06  | 1.01   | <i>Pnlprp1</i>                | pancreatic lipase related protein 1                                                            | 0006412 // translation // not recorded//0032543 // mitochondrial translation // not rec   |
| NM_025606    |          | 0.013   |       |       | 1.12   | 1.15   | -1.06  | 1.05   | <i>Mrp116</i>                 | mitochondrial ribosomal protein L16                                                            | 0006351 // transcription, DNA-templated // inferred from electronic annotation//00063     |
| NM_133968    | ///XM    | 0.017   |       |       | 1.13   | 1.07   | -1.06  | -1.02  | <i>Snopc2</i>                 | small nuclear RNA activating complex, polypeptide 2                                            | 0006351 // transcription, DNA-templated // inferred from electronic annotation//00063     |
| NM_0011      | 0.0081   | 0.019   |       |       | 1.06   | -1.24  | -1.06  | 1.16   | <i>Lpin2</i>                  | lipin 2                                                                                        | 0007165 // signal transduction // inferred from electronic annotation//0007166 // cell s  |
| NM_1391      | 0.0056   |         |       |       | -1.03  | 1.21   | -1.06  | 1.05   | <i>Adgre4</i>                 | adhesion G protein-coupled receptor E4                                                         | 0006898 // receptor-mediated endocytosis // not recorded//0007275 // multicellular or     |
| NM_033603    |          | 0.04    |       |       | 1.07   | 1.02   | -1.06  | -1.13  | <i>Amn</i>                    | amniotless                                                                                     | 0008152 // metabolic process // inferred from electronic annotation                       |
| NM_0255      | 0.0168   |         |       |       | -1.07  | 1.08   | -1.06  | -1.13  | <i>Nudt8</i>                  | nudix (nucleoside diphosphate linked moiety X)-type motif 8                                    | 000165 // MAPK cascade // not recorded//0000302 // response to reactive oxygen spe        |
| NM_0011      | 0.0066   |         |       |       | -1.01  | 1.29   | -1.06  | 1.09   | <i>Ptk2b</i>                  | PTK2 protein tyrosine kinase 2 beta                                                            | 0006351 // transcription, DNA-templated // inferred from electronic annotation//00063     |
| NM_001101502 | ///      | 0.042   |       |       | 1.12   | 1.15   | -1.06  | -1.03  | <i>Zfp703</i>                 | zinc finger protein 703                                                                        | 0001889 // liver development // inferred from mutant phenotype//0001947 // heart loc      |
| NM_007685    |          | 0.036   |       |       | -1.01  | 1.09   | -1.06  | -1.15  | <i>Cfc1</i>                   | cripto, FRL-1, cryptic family 1                                                                | 0000122 // negative regulation of transcription from RNA polymerase II promoter // infer  |
| NM_001098203 | ///      | 0.049   | 0.006 |       | 1.20   | 1.09   | -1.06  | -1.08  | <i>Hic1</i>                   | hypermethylated in cancer 1                                                                    | 0000122 // negative regulation of transcription from RNA polymerase II promoter // infer  |
| NM_0010      | 0.042    |         |       |       | 1.20   | 1.09   | -1.06  | -1.08  | <i>Hic1</i>                   | hypermethylated in cancer 1                                                                    | 0008544 // epidermis development // traceable author statement//0018149 // peptide        |
| NM_009374    | ///XM    | 0.0649  | 0.034 |       | 1.06   | -1.01  | -1.06  | -1.13  | <i>Tgm3</i>                   | transglutaminase 3, E polypeptide                                                              | 0000435 // positive regulation of transcription from RNA polymerase II promoter by gala   |
| NM_0108      | #####    | 0.003   |       |       | 1.07   | -1.09  | -1.06  | -1.04  | <i>Ncoa1</i>                  | nuclear receptor coactivator 1                                                                 | 0006351 // transcription, DNA-templated // inferred from electronic annotation//00063     |
| NM_0010      | 0.0062   |         |       |       | 1.03   | -1.10  | -1.06  | -1.10  | <i>Zfp518b</i>                | zinc finger protein 518B                                                                       |                                                                                           |
| NM_001161741 | ///NM_01 | 0.01    |       |       | -1.11  | 1.04   | -1.06  | 1.06   | <i>Reg3d</i>                  | regenerating islet-derived 3 delta                                                             | 0006810 // transport // inferred from electronic annotation//0006844 // acyl carnitine t  |
| NM_1813      | 0.0053   |         |       |       | 1.02   | -1.15  | -1.06  | -1.15  | <i>Slc25a29</i>               | solute carrier family 25 (mitochondrial carrier, palmitoylcarnitine transporter), membe        | 0000132 // establishment of mitotic spindle orientation // not recorded//0007049 // cel   |
| NM_027411    | ///XM    | 0.028   |       |       | -1.25  | -1.09  | -1.06  | -1.03  | <i>Spdl1</i>                  | spindle apparatus coiled-coil protein 1                                                        | 0000398 // mRNA splicing, via spliceosome // not recorded//0009725 // response to ho      |
| NM_001082961 | ///      | 0.02    |       |       | 1.02   | 1.04   | -1.06  | -1.03  | <i>Snrpn///Snrp///Gm35595</i> | small nuclear ribonucleoprotein N//SNRPN upstream reading frame//predicted gene                | 0003091 // renal water homeostasis // inferred from mutant phenotype//0006171 // cA       |
| NM_007405    | ///XM    | 0.017   |       |       | 1.06   | -1.02  | -1.06  | 1.13   | <i>Adcy6</i>                  | adenylate cyclase 6                                                                            | 0003149 // membranous septum morphogenesis // inferred from genetic interaction//0        |
| NM_0205      | 0.0234   |         |       |       | 1.08   | 1.32   | -1.06  | -1.05  | <i>Fzd2</i>                   | frizzled homolog 2 (Drosophila)                                                                | 0007155 // cell adhesion // inferred from electronic annotation//0007159 // leukocyte c   |
| NM_1537      | 0.0168   |         |       |       | 1.14   | 1.40   | -1.06  | 1.03   | <i>Fermt3</i>                 | fermitin family homolog 3 (Drosophila)                                                         |                                                                                           |
| NM_0213      | 0.0231   |         |       |       | -1.12  | 1.05   | -1.06  | -1.06  | <i>Vstm2b</i>                 | V-set and transmembrane domain containing 2B                                                   | 0001503 // ossification // inferred from direct assay//0001889 // liver development // ir |
| NM_008973    | ///XM    | 0.0650  | 0.027 |       | 1.02   | 1.05   | -1.06  | -1.27  | <i>Ptn</i>                    | pleiotrophin                                                                                   | 0006508 // proteolysis // inferred from electronic annotation//0007039 // protein catab   |
| NM_001024698 | ///      | 0.026   |       |       | -1.16  | -1.08  | -1.05  | -1.23  | <i>Cpa2</i>                   | carboxypeptidase A2, pancreatic                                                                | 0000122 // negative regulation of transcription from RNA polymerase II promoter // not i  |
| NM_009045    | ///XM    | 0.0653  | 0.018 |       | 1.12   | 1.13   | -1.05  | 1.06   | <i>Rela</i>                   | v-rel reticuloendotheliosis viral oncogene homolog A (avian)                                   | 0006351 // transcription, DNA-templated // inferred from electronic annotation//00063     |
| NM_023773    | ///XM    | 0.043   | 0.021 |       | 1.01   | -1.02  | -1.05  | -1.11  | <i>Mphosph8</i>               | M-phase phosphoprotein 8                                                                       | 0007165 // signal transduction // inferred from electronic annotation//0035556 // intra   |
| NM_0011      | 0.0146   |         |       |       | 1.02   | -1.24  | -1.05  | 1.04   | <i>Chn2</i>                   | chimerin 2                                                                                     | 0006629 // lipid metabolic process // inferred from electronic annotation//0006631 // f.  |
| NM_1456      | 0.0483   | 0.042   |       |       | -1.02  | -1.10  | -1.05  | -1.20  | <i>Alox12e</i>                | arachidonate lipoxygenase, epidermal                                                           |                                                                                           |

| RefSeq              | Tri    | p 24h | p 48h | p 72h | FD Air | FD 24h | FD 48h | FD 72h | Gene Symbol                   | Gene Title                                                                           | Gene Ontology Biological Process                                                            |
|---------------------|--------|-------|-------|-------|--------|--------|--------|--------|-------------------------------|--------------------------------------------------------------------------------------|---------------------------------------------------------------------------------------------|
| NM_0264             | 0.0471 |       |       |       | -1.00  | -1.19  | -1.05  | 1.34   | <i>Tppp3</i>                  | tubulin polymerization-promoting protein family member 3                             | 0001578 // microtubule bundle formation // not recorded//0046785 // microtubule pol         |
| NM_053249           |        |       | 0.004 |       | 1.09   | -1.07  | -1.05  | -1.24  | <i>Krt82</i>                  | keratin 82                                                                           |                                                                                             |
| NM_0233             | 0.0394 |       |       |       | -1.15  | 1.15   | -1.05  | -1.22  | <i>Samsn1</i>                 | SAM domain, SH3 domain and nuclear localization signals, 1                           | 0002820 // negative regulation of adaptive immune response // inferred from mutant ph       |
| NM_020279//XM_00651 | 0.027  |       |       |       | 1.03   | 1.01   | -1.05  | -1.10  | <i>Ccl28</i>                  | chemokine (C-C motif) ligand 28                                                      | 0001954 // positive regulation of cell-matrix adhesion // not recorded//0006935 // cher     |
| NM_001190466//      | 0.038  |       |       |       | 1.11   | 1.11   | -1.05  | 1.04   | <i>Dact1</i>                  | dapper homolog 1, antagonist of beta-catenin (xenopus)                               | 0000122 // negative regulation of transcription from RNA polymerase II promoter // not      |
| NM_1818             | 0.0391 |       |       |       | -1.11  | 1.02   | -1.05  | -1.13  | <i>Tpte</i>                   | transmembrane phosphatase with tensin homology                                       | 0006470 // protein dephosphorylation // inferred from electronic annotation//0016311        |
| NM_029798           |        | 0.032 |       |       | 1.07   | 1.01   | -1.05  | -1.17  | <i>Flywch2</i>                | FLYWCH family member 2                                                               |                                                                                             |
| NM_130886//XM_00653 | 0.01   |       |       |       | -1.03  | -1.02  | -1.05  | -1.13  | <i>Card14</i>                 | caspace recruitment domain family, member 14                                         | 0001934 // positive regulation of protein phosphorylation // not recorded//0006915 //       |
| NM_024479//XM_0031  | 0.031  |       |       |       | 1.07   | 1.05   | -1.05  | -1.05  | <i>Wbscr27</i>                | Williams Beuren syndrome chromosome region 27 (human)                                | 0008152 // metabolic process // inferred from electronic annotation//0032259 // meth        |
| NM_0013             | 0.0095 |       |       |       | 1.05   | -1.14  | -1.05  | -1.09  | <i>Vsx2</i>                   | visual system homeobox 2                                                             | 0006351 // transcription, DNA-templated // inferred from electronic annotation//00063       |
| NM_027203           |        | 0.042 | 0.01  |       | -1.17  | 1.00   | -1.05  | -1.03  | <i>Leng1</i>                  | leukocyte receptor cluster (LRC) member 1                                            |                                                                                             |
| NM_001003918//      | 0.016  |       |       |       | 1.03   | -1.04  | -1.05  | 1.01   | <i>Usp7</i>                   | ubiquitin specific peptidase 7                                                       | 0006281 // DNA repair // inferred from electronic annotation//0006283 // transcription      |
| NM_023312//XM_00650 | 0.018  |       |       |       | 1.05   | -1.05  | -1.05  | -1.28  | <i>Ndufa13//Yjefn3</i>        | NADH dehydrogenase (ubiquinone) 1 alpha subcomplex, 13//Yjef N-terminal domain       | 0006915 // apoptotic process // inferred from electronic annotation//0030308 // negati      |
| NM_001316699//NM_02 | 0.015  |       |       |       | 1.04   | -1.01  | -1.05  | -1.19  | <i>Mier2</i>                  | mesoderm induction early response 1, family member 2                                 | 0006351 // transcription, DNA-templated // inferred from electronic annotation//00063       |
| NM_001163770//      | 0.048  |       |       |       | 1.06   | 1.08   | -1.05  | 1.03   | <i>Dxo</i>                    | decapping exoribonuclease                                                            | 0006402 // mRNA catabolic process // inferred from mutant phenotype//0008152 // me          |
| NM_0081             | 0.0071 |       |       |       | -1.06  | -1.57  | -1.05  | 1.22   | <i>Glul</i>                   | glutamate-ammonia ligase (glutamine synthetase)                                      | 0006536 // glutamate metabolic process // not recorded//0006542 // glutamine biosyn         |
| NM_0082             | 0.007  |       |       |       | 1.06   | 1.51   | -1.05  | -1.26  | <i>Map4k1</i>                 | mitogen-activated protein kinase kinase kinase kinase 1                              | 0000165 // MAPK cascade // not recorded//0000185 // activation of MAPKKK activity //        |
| NM_146240//XM_00651 | 0.005  |       |       |       | -1.15  | -1.07  | -1.05  | 1.08   | <i>Rassf9</i>                 | Ras association (RalGDS/AF-6) domain family (N-terminal) member 9                    | 0007165 // signal transduction // inferred from electronic annotation//0046907 // intra     |
| NM_011592           |        | 0.046 |       |       | 1.04   | 1.00   | -1.05  | 1.11   | <i>Timm44</i>                 | translocase of inner mitochondrial membrane 44                                       | 0006810 // transport // inferred from electronic annotation//0006886 // intracellular pr    |
| NM_0010             | 0.0271 |       | 0.043 |       | 1.10   | -1.03  | -1.05  | 1.39   | <i>Fgfr1</i>                  | fibroblast growth factor receptor 1                                                  | 0000122 // negative regulation of transcription from RNA polymerase II promoter // infer    |
| NM_0011             | 0.039  |       |       |       | -1.10  | 1.07   | -1.05  | -1.14  | <i>Trp63</i>                  | transformation related protein 63                                                    | 0000122 // negative regulation of transcription from RNA polymerase II promoter // infer    |
| NM_007813//XM_00653 | 0.003  |       |       |       | 1.07   | -1.01  | -1.05  | -1.13  | <i>Cyp2b13</i>                | cytochrome P450, family 2, subfamily b, polypeptide 13                               | 0006805 // xenobiotic metabolic process // not recorded//0019373 // epoxygenase P45         |
| NM_0011             | 0.0182 |       |       |       | -1.07  | -1.39  | -1.05  | -1.32  | <i>Banp</i>                   | BTG3 associated nuclear protein                                                      | 0006351 // transcription, DNA-templated // inferred from electronic annotation//00063       |
| NM_028055//XM_00653 | 0.042  |       |       |       | -1.02  | 1.07   | -1.05  | -1.30  | <i>Btbd17</i>                 | BTB (POZ) domain containing 17                                                       |                                                                                             |
| NM_010758//XM_00653 | 0.026  |       |       |       | 1.08   | 1.08   | -1.05  | -1.07  | <i>Mag</i>                    | myelin-associated glycoprotein                                                       | 0007155 // cell adhesion // inferred from electronic annotation//0007399 // nervous sy      |
| NM_0013             | 0.0203 |       |       |       | -1.01  | 1.17   | -1.05  | -1.02  | <i>Grhpr</i>                  | glyoxylate reductase/hydroxypyruvate reductase                                       | 0007588 // excretion // not recorded//0008152 // metabolic process // inferred from el      |
| NM_1535             | 0.0012 |       |       |       | 1.20   | -1.12  | -1.05  | 1.20   | <i>Tns2</i>                   | tensin 2                                                                             | 0001822 // kidney development // inferred from mutant phenotype//0006470 // protei          |
| NM_0137             | 0.0112 |       |       |       | -1.13  | 1.19   | -1.05  | -1.01  | <i>LOC102642963//Rps26</i>    | 40S ribosomal protein S26-like//ribosomal protein S26                                | 0006412 // translation // inferred from electronic annotation//0033119 // negative regu     |
| NM_0010             | 0.0396 |       |       |       | 1.03   | -1.22  | -1.05  | 1.11   | <i>Pdgfra</i>                 | platelet derived growth factor receptor, alpha polypeptide                           | 0001553 // luteinization // inferred from genetic interaction//0001553 // luteinization /   |
| NM_0092             | 0.0226 |       |       |       | -1.02  | -1.21  | -1.05  | -1.03  | <i>Snta1</i>                  | syntrophin, acidic 1                                                                 | 0002027 // regulation of heart rate // not recorded//0003117 // regulation of vasocon       |
| NM_018780           |        | 0.036 |       |       | -1.00  | 1.02   | -1.05  | -1.18  | <i>Sfrp5</i>                  | secreted frizzled-related sequence protein 5                                         | 0007275 // multicellular organismal development // inferred from electronic annotati        |
| NM_053178//XM_0007  | 0.007  |       |       |       | -1.13  | -1.12  | -1.05  | -1.12  | <i>Acsbg1</i>                 | acyl-CoA synthetase bubblegum family member 1                                        | 0000038 // very long-chain fatty acid metabolic process // not recorded//0000038 // ve      |
| NM_1338             | 0.0072 |       |       |       | 1.02   | -1.17  | -1.05  | 1.10   | <i>Bsd1</i>                   | BSD domain containing 1                                                              |                                                                                             |
| NM_0012             | 0.0076 |       |       |       | 1.04   | -1.18  | -1.05  | 1.01   | <i>Rora</i>                   | RAR-related orphan receptor alpha                                                    | 0001525 // angiogenesis // not recorded//0006351 // transcription, DNA-templated // i       |
| NM_0013             | 0.0436 |       |       |       | 1.07   | -1.15  | -1.05  | 1.10   | <i>Trpc1</i>                  | transient receptor potential cation channel, subfamily C, member 1                   | 0006810 // transport // inferred from electronic annotation//0006811 // ion transport /     |
| NM_0013             | 0.0124 |       |       |       | -1.03  | 1.13   | -1.05  | -1.09  | <i>Car7</i>                   | carbonic anhydrase 7                                                                 | 0002230 // positive regulation of defense response to virus by host // not recorded//00     |
| NM_001290789//NM_02 | 0.032  |       |       |       | 1.07   | -1.03  | -1.05  | -1.17  | <i>Shroom1</i>                | shroom family member 1                                                               | 0000902 // cell morphogenesis // inferred from direct assay//0051017 // actin filament      |
| NM_008997//XM_0022  | 0.022  |       |       |       | 1.14   | 1.08   | -1.05  | 1.08   | <i>Rab11b</i>                 | RAB11B, member RAS oncogene family                                                   | 0001881 // receptor recycling // inferred from mutant phenotype//0006810 // transpor        |
| NR_02832            | 0.0374 |       |       |       | 1.05   | -1.10  | -1.05  | -1.01  | <i>Appbp2os</i>               | amyloid beta precursor protein (cytoplasmic tail) binding protein 2, opposite strand |                                                                                             |
| NM_001085348//NM_00 | 0.014  |       |       |       | 1.04   | -1.07  | -1.05  | -1.20  | <i>Rhox2a//Rhox2b//Rhox2e</i> | reproductive homeobox 2A//reproductive homeobox 2B//reproductive homeobox 2          | 0000122 // negative regulation of transcription from RNA polymerase II promoter // infer    |
| NM_172665//XM_0037  | 0.037  |       |       |       | 1.15   | 1.08   | -1.05  | -1.01  | <i>Pdk1</i>                   | pyruvate dehydrogenase kinase, isoenzyme 1                                           | 0005975 // carbohydrate metabolic process // inferred from electronic annotation//000       |
| NM_024264//XM_0039  | 0.039  |       |       |       | 1.09   | 1.01   | -1.05  | -1.07  | <i>Cyp27a1</i>                | cytochrome P450, family 27, subfamily a, polypeptide 1                               | 0008203 // cholesterol metabolic process // not recorded//0036378 // calcitriol biosyn      |
| NM_016852//XM_0049  | 0.049  |       |       |       | -1.01  | 1.02   | -1.05  | 1.18   | <i>Wbp2</i>                   | WW domain binding protein 2                                                          | 0045184 // establishment of protein localization // not recorded//0045815 // positive re    |
| NM_0090             | 0.0066 | 0.005 | 0.001 |       | -1.00  | -1.01  | -1.05  | 1.01   | <i>Rps29</i>                  | ribosomal protein S29                                                                | 0006412 // translation // not recorded                                                      |
| NM_024190//NM_02592 | 0.033  |       |       |       | -1.11  | -1.01  | -1.05  | 1.15   | <i>2610002M06Rik//Chmp1b</i>  | RIKEN cDNA 2610002M06 gene//charged multivesicular body protein 1B                   | 0000920 // cell separation after cytokinesis // not recorded//0006810 // transport // inf   |
| NM_0011             | 0.0487 |       |       |       | -1.05  | 1.07   | -1.05  | -1.11  | <i>6-Sep</i>                  | septin 6                                                                             | 0007049 // cell cycle // inferred from electronic annotation//0051301 // cell division // i |
| NM_001310766//NM_02 | 0.004  |       |       |       | 1.01   | -1.06  | -1.05  | -1.13  | <i>B3gat1</i>                 | beta-1,3-glucuronyltransferase 1 (glucuronosyltransferase P)                         | 0005975 // carbohydrate metabolic process // not recorded//0006486 // protein glycos        |
| NM_2072             | 0.0274 |       |       |       | 1.06   | 1.19   | -1.05  | -1.26  | <i>Mrps26</i>                 | mitochondrial ribosomal protein S26                                                  |                                                                                             |
| NM_0257             | 0.0136 |       |       |       | -1.05  | 1.09   | -1.05  | -1.08  | <i>Adat2</i>                  | adenosine deaminase, tRNA-specific 2                                                 | 0002100 // tRNA wobble adenosine to inosine editing // inferred from electronic annotat     |
| NM_0010             | 0.0332 |       |       |       | -1.05  | 1.17   | -1.05  | -1.08  | <i>Lif</i>                    | leukemia inhibitory factor                                                           | 0001974 // blood vessel remodeling // inferred from genetic interaction//0006955 // im      |
| NM_0012             | 0.0244 |       |       |       | 1.05   | -1.17  | -1.05  | 1.07   | <i>Birc2</i>                  | baculoviral IAP repeat-containing 2                                                  | 0000209 // protein polyubiquitination // not recorded//0001666 // response to hypoxia       |
| NM_0013             | 0.0016 |       |       |       | 1.01   | 2.38   | -1.05  | -1.06  | <i>Coro1a</i>                 | coronin, actin binding protein 1A                                                    | 0001845 // phagolysosome assembly // not recorded//0006816 // calcium ion transport         |
| NM_0013             | 0.0166 |       |       |       | -1.00  | 1.54   | -1.05  | -1.16  | <i>Prkcb</i>                  | protein kinase C, beta                                                               | 0001666 // response to hypoxia // inferred from direct assay//0002250 // adaptive imm       |
| NM_172676//XM_0023  | 0.023  |       |       |       | 1.10   | -1.00  | -1.05  | 1.04   | <i>Samd10</i>                 | sterile alpha motif domain containing 10                                             |                                                                                             |
| NM_0010             | 0.007  |       |       |       | 1.04   | -1.25  | -1.05  | 1.07   | <i>Dock9</i>                  | dedicator of cytokinesis 9                                                           | 0007264 // small GTPase mediated signal transduction // inferred from electronic annota     |
| NM_001039653//NM_01 | 0.019  |       |       |       | 1.03   | -1.05  | -1.05  | -1.20  | <i>Lhx3</i>                   | LIM homeobox protein 3                                                               | 0001890 // placenta development // inferred from genetic interaction//0006351 // tran       |
| NM_0106             | 0.0028 |       |       |       | -1.04  | -1.70  | -1.05  | -1.01  | <i>Klf9</i>                   | Kruppel-like factor 9                                                                | 0006351 // transcription, DNA-templated // inferred from electronic annotation//00063       |
| NM_145394           |        | 0.025 |       |       | -1.10  | -1.03  | -1.05  | 1.11   | <i>Slc44a3</i>                | solute carrier family 44, member 3                                                   |                                                                                             |
| NM_0012             | 0.0167 |       |       |       | -1.01  | 1.40   | -1.05  | -1.10  | <i>Fyb</i>                    | FYN binding protein                                                                  | 0006955 // immune response // inferred from electronic annotation//0045576 // mast c        |
| NM_011616           |        | 0.033 |       |       | -1.00  | -1.08  | -1.05  | -1.18  | <i>Cd40lg</i>                 | CD40 ligand                                                                          | 0002839 // positive regulation of immune response to tumor cell // not recorded//0006       |
| NM_0010             | 0.0018 | 0.011 |       |       | 1.07   | -1.12  | -1.05  | -1.05  | <i>Cmc4//Mtcp1</i>            | C-x(9)-C motif containing 4//mature T cell proliferation 1                           |                                                                                             |
| NM_175667           |        | 0.022 |       |       | 1.07   | -1.04  | -1.05  | -1.18  | <i>Ankfn1</i>                 | ankyrin repeat and EF-hand domain containing 1                                       |                                                                                             |
| NM_013851//XM_0038  | 0.038  |       |       |       | 1.16   | 1.05   | -1.05  | -1.08  | <i>Abca8b</i>                 | ATP-binding cassette, sub-family A (ABC1), member 8b                                 | 0006810 // transport // not recorded//0006869 // lipid transport // not recorded//000       |
| NM_0118             | 0.0198 |       |       |       | -1.03  | -1.17  | -1.05  | -1.04  | <i>Mmp17</i>                  | matrix metalloproteinase 17                                                          | 0006508 // proteolysis // inferred from electronic annotation                               |



| RefSeq       | Tri.p        | 24h   | p     | 48h | p | 72h | FD Air | FD 24h | FD 48h | FD 72h | Gene Symbol                                         | Gene Title                                                                        | Gene Ontology Biological Process                                                           |
|--------------|--------------|-------|-------|-----|---|-----|--------|--------|--------|--------|-----------------------------------------------------|-----------------------------------------------------------------------------------|--------------------------------------------------------------------------------------------|
| NM_0094      | 0.0188       |       |       |     |   |     | 1.03   | -1.12  | -1.05  | 1.14   | <i>Tst</i>                                          | thiosulfate sulfurtransferase, mitochondrial                                      | 0008152 // metabolic process // inferred from electronic annotation//0030855 // epith      |
| NM_0010      | 0.0478       |       |       |     |   |     | -1.11  | 1.04   | -1.05  | 1.05   | <i>11-Sep</i>                                       | septin 11                                                                         | 0007049 // cell cycle // inferred from electronic annotation//0051291 // protein hetero    |
| NM_0086      | 0.0104       |       |       |     |   |     | 1.10   | -1.08  | -1.05  | 1.16   | <i>Mmp15</i>                                        | matrix metalloproteinase 15                                                       | 0006508 // proteolysis // inferred from electronic annotation//0032355 // response to e    |
| NM_007435    |              | 0.034 |       |     |   |     | 1.10   | 1.17   | -1.04  | 1.12   | <i>Abcd1</i>                                        | ATP-binding cassette, sub-family D (ALD), member 1                                | 0006635 // fatty acid beta-oxidation // inferred from mutant phenotype//0006635 // fa      |
| NM_0104      | 0.0257       |       |       |     |   |     | -1.06  | -1.13  | -1.04  | -1.04  | <i>Hexa</i>                                         | hexosaminidase A                                                                  | 0001501 // skeletal system development // inferred from genetic interaction//0005975 ,     |
| NM_1445      | 0.032        |       |       |     |   |     | -1.12  | 1.04   | -1.04  | -1.07  | <i>Fcgr4</i>                                        | Fc receptor, IgG, low affinity IV                                                 | 0001866 // NK T cell proliferation // not recorded//0051930 // regulation of sensory per   |
| NM_0012      | 0.0301       |       |       |     |   |     | -1.05  | 1.07   | -1.04  | -1.07  | <i>Nppb</i>                                         | natriuretic peptide type B                                                        | 0001666 // response to hypoxia // inferred from electronic annotation//0003085 // neg      |
| NM_020289    |              |       | 0.032 |     |   |     | 1.05   | 1.00   | -1.04  | -1.22  | <i>Olfir544</i>                                     | olfactory receptor 544                                                            | 0007165 // signal transduction // not recorded//0007186 // G-protein coupled receptor      |
| NM_001285845 | ///          | 0.018 |       |     |   |     | 1.11   | 1.10   | -1.04  | 1.12   | <i>Paqr7</i>                                        | progesterin and adipoQ receptor family member VII                                 | 0006810 // multicellular organismal development // inferred from electronic annotation/    |
| NM_011121    |              | 0.032 |       |     |   |     | 1.10   | 1.03   | -1.04  | 1.04   | <i>Plk1</i>                                         | polo-like kinase 1                                                                | 0000070 // mitotic sister chromatid segregation // not recorded//0000086 // G2/M tran      |
| NM_0010      | 0.0031       |       |       |     |   |     | -1.00  | 1.13   | -1.04  | 1.11   | <i>Thoc6</i>                                        | THO complex 6 homolog (Drosophila)                                                | 0006397 // mRNA processing // inferred from electronic annotation//0006406 // mRNA         |
| NM_001162485 | ///          | 0.032 |       |     |   |     | 1.05   | 1.08   | -1.04  | 1.00   | <i>Aradc1</i>                                       | arrestin domain containing 1                                                      |                                                                                            |
| NM_0012      | 0.046        |       | 0.022 |     |   |     | 1.09   | 1.00   | -1.04  | -1.06  | <i>Ranbp3</i>                                       | RAN binding protein 3                                                             | 0006810 // transport // inferred from electronic annotation//0015031 // protein transp     |
| NM_001146153 | ///NM_01     | 0.038 |       |     |   |     | 1.01   | 1.03   | -1.04  | -1.21  | <i>Homer3</i>                                       | homer homolog 3 (Drosophila)                                                      | 0006810 // G-protein coupled glutamate receptor signaling pathway // traceable author :    |
| NM_027122    |              | 0.038 |       |     |   |     | 1.03   | -1.02  | -1.04  | -1.19  | <i>Mfsd3</i>                                        | major facilitator superfamily domain containing 3                                 | 0006810 // transport // not recorded//0015992 // proton transport // ---//0055085 // :     |
| NM_0101      | 0.0044       |       | 0.012 |     |   |     | 1.10   | -1.04  | -1.04  | -1.07  | <i>Ext2</i>                                         | exostosins (multiple) 2                                                           | 0001503 // ossification // not recorded//0001707 // mesoderm formation // inferred fr      |
| NM_0101      | 0.0044       |       |       |     |   |     | -1.09  | 1.15   | -1.04  | -1.13  | <i>Fcgr1</i>                                        | Fc receptor, IgG, high affinity I                                                 | 0001788 // antibody-dependent cellular cytotoxicity // inferred from mutant phenotype/     |
| NM_0010      | 0.0105       |       |       |     |   |     | -1.01  | -1.13  | -1.04  | 1.14   | <i>Zfp57</i>                                        | zinc finger protein 57                                                            | 0000122 // negative regulation of transcription from RNA polymerase II promoter // infer   |
| NM_144913    |              | 0.021 |       |     |   |     | 1.10   | 1.08   | -1.04  | 1.00   | <i>Mepece</i>                                       | methylphosphate capping enzyme                                                    | 0000122 // negative regulation of transcription from RNA polymerase II promoter // infer   |
| NM_0011      | 0.0393       |       |       |     |   |     | 1.05   | -1.09  | -1.04  | -1.03  | <i>Tmem184a</i>                                     | transmembrane protein 184a                                                        | 0006810 // transport // ---//0018992 // germ-line sex determination // inferred from m     |
| NM_145490    | ///XM        | 0.044 |       |     |   |     | 1.14   | 1.00   | -1.04  | 1.02   | <i>Zfp959</i>                                       | zinc finger protein 959                                                           | 0006355 // regulation of transcription, DNA-templated // not recorded                      |
| NM_001003815 | ///          | 0.017 |       |     |   |     | 1.11   | 1.02   | -1.04  | -1.02  | <i>Epb411</i>                                       | erythrocyte membrane protein band 4.1 like 1                                      | 0001558 // regulation of cell growth // inferred from electronic annotation//0007010 //    |
| NM_172439    | ///XM_006514 | 0.024 |       |     |   |     | 1.04   | -1.02  | -1.04  | -1.04  | <i>Inpp5j</i>                                       | inositol polyphosphate 5-phosphatase J                                            | 0006470 // protein dephosphorylation // inferred from direct assay//0006470 // protei      |
| NM_0095      | 0.027        | 0.034 |       |     |   |     | 1.06   | -1.04  | -1.04  | 1.03   | <i>Vpreb3</i>                                       | pre-B lymphocyte gene 3                                                           | 0002377 // immunoglobulin production // ---//0006955 // immune response // ---//00:        |
| NM_028071    | #####        |       |       |     |   |     | 1.04   | 1.12   | -1.04  | 1.04   | <i>Cot1</i>                                         | coactosin-like 1 (Dictyostelium)                                                  | 0019370 // leukotriene biosynthetic process // inferred from electronic annotation//00:    |
| NM_012042    | ///XM_006506 | 0.022 |       |     |   |     | -1.23  | 1.03   | -1.04  | 1.16   | <i>Cul1</i>                                         | cullin 1                                                                          | 0006511 // ubiquitin-dependent protein catabolic process // inferred by curator//00065     |
| NM_1752      | 0.0034       |       |       |     |   |     | 1.11   | -1.21  | -1.04  | 1.00   | <i>Arid2</i>                                        | AT rich interactive domain 2 (ARID, RFX-like)                                     | 0006337 // nucleosome disassembly // not recorded//0006355 // regulation of transcrip      |
| NM_0296      | 0.0235       |       |       |     |   |     | 1.04   | 1.17   | -1.04  | 1.10   | <i>Plet1</i>                                        | placenta expressed transcript 1                                                   | 0001953 // negative regulation of cell-matrix adhesion // inferred from mutant phenoty     |
| NM_0012      | 0.0169       |       |       |     |   |     | -1.05  | 1.38   | -1.04  | 1.06   | <i>Irx3</i>                                         | Iroquois related homeobox 3                                                       | 0001656 // metanephros development // inferred from expression pattern//0001822 //         |
| NM_011910    |              | 0.025 |       |     |   |     | 1.09   | -1.10  | -1.04  | -1.20  | <i>Uts2</i>                                         | urotensin 2                                                                       | 0001666 // response to hypoxia // inferred from electronic annotation//0003105 // neg      |
| NM_001171024 | ///NM_01     | 0.036 |       |     |   |     | 1.04   | 1.05   | -1.04  | -1.21  | <i>Gm21948</i> /// <i>Il4i1</i>                     | predicted gene, 21948//interleukin 4 induced 1                                    | 0006351 // transcription, DNA-templated // ---//0006351 // transcription, DNA-templat      |
| NM_013581    | ///XM_006536 | 0.005 |       |     |   |     | 1.03   | 1.05   | -1.04  | -1.06  | <i>Cog1</i> /// <i>LOC102641618</i>                 | component of oligomeric golgi complex 1//conserved oligomeric Golgi complex subur | 0000301 // retrograde transport, vesicle recycling within Golgi // not recorded//0006811   |
| NM_018730    | ///XM_006524 | 0.027 |       |     |   |     | 1.04   | 1.16   | -1.04  | -1.26  | <i>Rpl36</i> /// <i>Rpl36-ps2</i> /// <i>Gm4604</i> | ribosomal protein L36//ribosomal protein L36, pseudogene 2//predicted gene 4604   | 0002181 // cytoplasmic translation // ---//0006412 // translation // inferred from elect   |
| NM_1530      | 0.043        |       |       |     |   |     | -1.09  | 1.03   | -1.04  | -1.14  | <i>Tmem5</i>                                        | transmembrane protein 5                                                           | 0006486 // protein glycosylation // inferred from electronic annotation//0035269 // prc    |
| NM_001287514 | ///          | 0.001 |       |     |   |     | 1.08   | 1.02   | -1.04  | 1.05   | <i>Cebpa</i>                                        | CCAAT/enhancer binding protein (C/EBP), alpha                                     | 0000050 // urea cycle // inferred from direct assay//0000122 // negative regulation of t   |
| NM_0011      | 0.0063       |       |       |     |   |     | 1.18   | 1.05   | -1.04  | -1.02  | <i>Zfp574</i>                                       | zinc finger protein 574                                                           | 0006351 // transcription, DNA-templated // inferred from electronic annotation//00063      |
| NM_0213      | 0.0147       | 0.047 |       |     |   |     | -1.17  | 1.02   | -1.04  | -1.04  | <i>Cd200r1</i>                                      | CD200 receptor 1                                                                  |                                                                                            |
| NM_015803    | ///XM_006515 | 0.017 |       |     |   |     | 1.05   | -1.07  | -1.04  | -1.27  | <i>Atp8a2</i>                                       | ATPase, aminophospholipid transporter-like, class I, type 8A, member 2            | 0003011 // involuntary skeletal muscle contraction // inferred from mutant phenotype//,    |
| NM_001031667 | ///          | 0.016 |       |     |   |     | 1.06   | 1.04   | -1.04  | -1.03  | <i>Gsk3a</i>                                        | glycogen synthase kinase 3 alpha                                                  | 0003073 // regulation of systemic arterial blood pressure // inferred from mutant phenot   |
| NM_144829    | ///XM_006534 | 0.019 |       |     |   |     | -1.04  | 1.03   | -1.04  | 1.12   | <i>Aarsd1</i>                                       | alanyl-tRNA synthetase domain containing 1                                        | 0006412 // translation // inferred from electronic annotation//0006419 // alanyl-tRNA e    |
| NM_0294      | 0.0298       | 0.03  | 0.01  |     |   |     | 1.09   | -1.06  | -1.04  | -1.18  | <i>Klf17</i>                                        | Kruppel-like factor 17                                                            | 0000122 // negative regulation of transcription from RNA polymerase II promoter // infer   |
| NM_028636    | ///XM_006511 | 0.014 |       |     |   |     | 1.10   | 1.00   | -1.04  | -1.01  | <i>Man2c1</i>                                       | mannosidase, alpha, class 2C, member 1                                            | 0005975 // carbohydrate metabolic process // inferred from electronic annotation//000      |
| NM_0232      | 0.0477       |       |       |     |   |     | 1.17   | 1.06   | -1.04  | 1.07   | <i>Fastk</i>                                        | Fas-activated serine/threonine kinase                                             | 0006468 // protein phosphorylation // not recorded//0006915 // apoptotic process // ir     |
| NM_153053    |              | 0.045 | 0.04  |     |   |     | 1.04   | 1.06   | -1.04  | -1.14  | <i>Sf3b4</i>                                        | splicing factor 3b, subunit 4                                                     | 0006397 // mRNA processing // inferred from electronic annotation//0008380 // RNA sp       |
| NM_0085      | 0.0418       |       | 0.048 |     |   |     | 1.14   | 1.49   | -1.04  | -1.20  | <i>Blink</i>                                        | B cell linker                                                                     | 0006955 // immune response // not recorded//0007169 // transmembrane receptor pr           |
| NM_0011      | 0.0164       |       |       |     |   |     | 1.03   | 1.30   | -1.04  | -1.08  | <i>Fcrla</i>                                        | Fc receptor-like A                                                                | 0030154 // cell differentiation // inferred from electronic annotation                     |
| NM_0011      | 0.0141       |       |       |     |   |     | -1.01  | 1.72   | -1.04  | -1.05  | <i>Sell</i>                                         | selectin, lymphocyte                                                              | 0007155 // cell adhesion // inferred from electronic annotation//0033198 // response to    |
| NM_173382    |              | 0.034 |       |     |   |     | -1.01  | 1.02   | -1.04  | -1.22  | <i>Proser1</i>                                      | proline and serine rich 1                                                         |                                                                                            |
| NM_0010      | 0.0167       |       |       |     |   |     | 1.07   | -1.17  | -1.04  | -1.07  | <i>Unc13b</i>                                       | unc-13 homolog B (C. elegans)                                                     | 0006887 // exocytosis // inferred from electronic annotation//0007165 // signal transdu    |
| NM_001290508 | ///          | 0.027 |       |     |   |     | 1.07   | 1.09   | -1.04  | -1.03  | <i>Dolpp1</i>                                       | dolichyl pyrophosphate phosphatase 1                                              | 0006486 // protein glycosylation // inferred from electronic annotation//0006487 // prc    |
| NM_153570    |              | 0.007 |       |     |   |     | 1.08   | 1.07   | -1.04  | -1.08  | <i>Noc4l</i>                                        | nucleolar complex associated 4 homolog (S. cerevisiae)                            | 0042254 // ribosome biogenesis // inferred from electronic annotation                      |
| NM_026849    | ///XM_006506 | 0.042 |       |     |   |     | 1.09   | -1.05  | -1.04  | -1.13  | <i>Mtmt14</i>                                       | myotubularin related protein 14                                                   | 0006470 // protein dephosphorylation // ---//0006470 // protein dephosphorylation // i     |
| NM_001045520 | ///XM_006    | 0.037 |       |     |   |     | -1.11  | -1.02  | -1.04  | 1.13   | <i>Clint1</i>                                       | clathrin interactor 1                                                             | 0006897 // endocytosis // inferred from electronic annotation//0016192 // vesicle-medi     |
| NM_001310587 | ///          | 0.006 | 0.033 |     |   |     | 1.10   | 1.04   | -1.04  | -1.05  | <i>Mef2d</i>                                        | myocyte enhancer factor 2D                                                        | 0001649 // osteoblast differentiation // inferred from genetic interaction//0001958 // e   |
| NM_0011      | 0.0412       |       |       |     |   |     | -1.09  | -1.03  | -1.04  | -1.05  | <i>Gtse1</i>                                        | G two S phase expressed protein 1                                                 |                                                                                            |
| NM_001243049 | ///          | 0.042 |       |     |   |     | 1.16   | 1.21   | -1.04  | 1.19   | <i>Atp6v0a1</i>                                     | ATPase, H+ transporting, lysosomal V0 subunit A1                                  | 0006810 // transport // inferred from electronic annotation//0006811 // ion transport /    |
| NM_001307989 | ///NM_01     | 0.042 |       |     |   |     | 1.01   | 1.03   | -1.04  | -1.19  | <i>Nr4a3</i>                                        | nuclear receptor subfamily 4, group A, member 3                                   | 0000122 // negative regulation of transcription from RNA polymerase II promoter // infer   |
| NM_0118      | 0.0203       |       |       |     |   |     | -1.05  | 1.11   | -1.04  | 1.01   | <i>Med24</i>                                        | mediator complex subunit 24                                                       | 0006351 // transcription, DNA-templated // inferred from electronic annotation//00063      |
| NM_0013      | 0.0053       |       | 0.01  |     |   |     | 1.05   | -1.12  | -1.04  | -1.12  | <i>Arx</i>                                          | aristaeless related homeobox                                                      | 0000122 // negative regulation of transcription from RNA polymerase II promoter // infer   |
| NM_0085      | #####        |       |       |     |   |     | 1.06   | -1.50  | -1.04  | 1.04   | <i>Mertk</i>                                        | c-mer proto-oncogene tyrosine kinase                                              | 0001779 // natural killer cell differentiation // inferred from genetic interaction//00064 |
| NM_033523    | ///XM        | 0.023 |       |     |   |     | 1.05   | -1.01  | -1.04  | 1.08   | <i>Spred2</i>                                       | sprouty-related, EVH1 domain containing 2                                         | 0000188 // inactivation of MAPK activity // inferred from mutant phenotype//0007275 ,      |
| NM_001081277 | ///XM_006    | 0.028 |       |     |   |     | 1.12   | 1.09   | -1.04  | -1.05  | <i>Ak5</i>                                          | adenylate kinase 5                                                                | 0006139 // nucleobase-containing compound metabolic process // inferred from electri       |
| NM_0806      | 0.023        |       |       |     |   |     | 1.00   | -1.28  | -1.04  | -1.01  | <i>Caskin2</i>                                      | CASK-interacting protein 2                                                        |                                                                                            |
| NM_001205396 | ///NM_05     | 0.016 |       |     |   |     | 1.06   | 1.07   | -1.04  | -1.20  | <i>Gprc5d</i>                                       | G protein-coupled receptor, family C, group 5, member D                           | 0007165 // signal transduction // inferred from electronic annotation//0007186 // G-prc    |

| RefSeq       | Tri p      | 24h     | p     | 48h  | p    | 72h   | FD Air | FD 24h         | FD 48h                                                                           | FD 72h                                                                                   | Gene Symbol          | Gene Title                                                                                | Gene Ontology Biological Process                                                           |
|--------------|------------|---------|-------|------|------|-------|--------|----------------|----------------------------------------------------------------------------------|------------------------------------------------------------------------------------------|----------------------|-------------------------------------------------------------------------------------------|--------------------------------------------------------------------------------------------|
| NM_1832      | 0.0232     |         |       |      |      |       | -1.01  | -1.12          | -1.04                                                                            | -1.05                                                                                    | <i>Rnmt1</i>         | RNA methyltransferase like 1                                                              | 0001510 // RNA methylation // not recorded//0006364 // rRNA processing // inferred fr      |
| NM_0013      | 0.0052     |         |       |      |      |       | 1.08   | 1.53           | -1.04                                                                            | -1.16                                                                                    | <i>Ccr7</i>          | chemokine (C-C motif) receptor 7                                                          | 0001768 // establishment of T cell polarity // traceable author statement//0002408 // r    |
| NM_0011      | 0.0189     |         |       |      |      |       | 1.01   | 1.15           | -1.04                                                                            | -1.02                                                                                    | <i>Ccm2</i>          | cerebral cavernous malformation 2                                                         | 0001568 // blood vessel development // inferred from mutant phenotype//0001570 // \        |
| NM_011790    | //XM       | 0.019   |       |      |      |       | 1.07   | 1.14           | -1.04                                                                            | 1.01                                                                                     | <i>Arih2</i>         | ariadne homolog 2 (Drosophila)                                                            | 0000209 // protein polyubiquitination // not recorded//0006511 // ubiquitin-dependen       |
| NM_0094      | 0.0447     |         |       |      |      |       | 1.02   | -1.18          | -1.04                                                                            | -1.28                                                                                    | <i>Tpst2</i>         | protein-tyrosine sulfotransferase 2                                                       | 0006478 // peptidyl-tyrosine sulfation // inferred from mutant phenotype//0007342 // l     |
| NM_145374    | //XM       | 0.007   |       |      |      |       | 1.05   | 1.07           | -1.04                                                                            | 1.05                                                                                     | <i>Mios</i>          | missing oocyte, meiosis regulator, homolog (Drosophila)                                   | 0032008 // positive regulation of TOR signaling // not recorded//0034198 // cellular res   |
| NM_001037801 | //NM_001   | #####   |       |      |      |       | 1.09   | 1.03           | -1.04                                                                            | -1.12                                                                                    | <i>Cd6</i>           | CD6 antigen                                                                               | 0001771 // immunological synapse formation // inferred from sequence or structural sim     |
| NM_001289442 | //NM_001   | 0.021   |       |      |      |       | 1.01   | 1.07           | -1.04                                                                            | -1.13                                                                                    | <i>Grap2</i>         | GRB2-related adaptor protein 2                                                            |                                                                                            |
| NM_0011      | 0.006      |         |       |      |      |       | -1.30  | 1.14           | -1.04                                                                            | -1.04                                                                                    | <i>Apoc1</i>         | apolipoprotein C-I                                                                        | 0006641 // triglyceride metabolic process // inferred from mutant phenotype//0006810       |
| NM_2076      | 0.0124     |         |       |      |      |       | -1.00  | -1.44          | -1.04                                                                            | 1.02                                                                                     | <i>Fndc3a</i>        | fibronectin type III domain containing 3A                                                 | 0007286 // spermatid development // inferred from mutant phenotype//0009566 // fer         |
| NM_018730    | //XM       | 0.0652  | 0.037 |      |      |       | 1.06   | 1.16           | -1.04                                                                            | -1.23                                                                                    | <i>Rpl36</i>         | ribosomal protein L36//ribosomal protein L36, pseudogene 2//predicted gene 4604           | 0002181 // cytoplasmic translation // ---//0006412 // translation // inferred from electr  |
| NM_0011      | 0.0098     |         |       |      |      |       | 1.06   | -1.05          | -1.04                                                                            | 1.10                                                                                     | <i>Kat7</i>          | K(lysine) acetyltransferase 7                                                             | 0006260 // DNA replication // not recorded//0006351 // transcription, DNA-templated ,      |
| NM_175275    | //NM_17738 | 0.044   |       |      |      |       | 1.13   | -1.03          | -1.04                                                                            | -1.15                                                                                    | <i>Cntln</i>         | centlein, centrosomal protein                                                             | 0010457 // centriole-centriole cohesion // not recorded//0033365 // protein localizatio    |
| NM_0012      | 0.0107     |         |       |      |      |       | 1.09   | -1.06          | -1.03                                                                            | 1.01                                                                                     | <i>Osbpl6</i>        | oxysterol binding protein-like 6                                                          | 0006810 // transport // inferred from electronic annotation//0006869 // lipid transport    |
| NM_0011      | 0.037      |         |       |      |      |       | 1.12   | 1.35           | -1.03                                                                            | 1.10                                                                                     | <i>Fcrl1</i>         | Fc receptor-like 1                                                                        |                                                                                            |
| NM_0012      | 0.0489     |         |       |      |      |       | -1.03  | 1.19           | -1.03                                                                            | -1.19                                                                                    | <i>Cmtm7</i>         | CKLF-like MARVEL transmembrane domain containing 7                                        | 0002337 // B-1a B cell differentiation // inferred from mutant phenotype//0006935 // c     |
| NM_0110      | 0.0491     |         |       |      |      |       | -1.07  | 1.10           | -1.03                                                                            | -1.15                                                                                    | <i>Pitx1</i>         | paired-like homeodomain transcription factor 1                                            | 0001501 // skeletal system development // inferred from mutant phenotype//0006351 ,        |
| NM_1789      | 0.0354     |         |       |      |      |       | -1.10  | -1.01          | -1.03                                                                            | -1.09                                                                                    | <i>Hic2</i>          | hypermethylated in cancer 2                                                               | 0006351 // transcription, DNA-templated // inferred from electronic annotation//00063      |
| NM_0289      | 0.0397     | 0.03    |       |      |      |       | 1.02   | -1.05          | -1.03                                                                            | -1.08                                                                                    | <i>Gorasp1</i>       | golgi reassembly stacking protein 1                                                       | 0006487 // protein N-linked glycosylation // inferred from mutant phenotype//0006810       |
| NM_0254      | 0.0406     |         |       |      |      |       | 1.08   | -1.08          | -1.03                                                                            | -1.03                                                                                    | <i>1700018B24Rik</i> | enhancer of rudimentary homolog pseudogene                                                | 0006221 // pyrimidine nucleotide biosynthetic process // inferred from electronic annota   |
| NM_0010      | 0.0364     |         |       |      |      |       | -1.20  | -1.60          | -1.03                                                                            | -1.09                                                                                    | <i>Gprasp1</i>       | G protein-coupled receptor associated sorting protein 1                                   | 0008333 // endosome to lysosome transport // not recorded//1990172 // G-protein cot        |
| NM_0076      | 0.0065     |         |       |      |      |       | 1.08   | 2.18           | -1.03                                                                            | -1.15                                                                                    | <i>Ms4a1</i>         | membrane-spanning 4-domains, subfamily A, member 1                                        | 0042113 // B cell activation // inferred from electronic annotation                        |
| NM_0012      | 0.002      |         |       |      |      |       | -1.00  | -1.26          | -1.03                                                                            | 1.14                                                                                     | <i>Cav1</i>          | caveolin 1, caveolae protein                                                              | 0001122 // negative regulation of transcription from RNA polymerase II promoter // infer   |
| NM_0080      | 0.0457     |         |       |      |      |       | 1.10   | -1.01          | -1.03                                                                            | 1.03                                                                                     | <i>Fzd8</i>          | frizzled homolog 8 (Drosophila)                                                           | 0001122 // negative regulation of transcription from RNA polymerase II promoter // infer   |
| NM_0010      | 0.0342     |         |       |      |      |       | 1.16   | -1.12          | -1.03                                                                            | 1.09                                                                                     | <i>Zscan26</i>       | zinc finger and SCAN domain containing 26                                                 | 0006351 // transcription, DNA-templated // inferred from electronic annotation//00063      |
| NM_0011      | 0.0457     | 0.011   |       |      |      |       | -1.15  | -1.02          | -1.03                                                                            | 1.00                                                                                     | <i>Zfp937</i>        | zinc finger protein 937                                                                   |                                                                                            |
| NM_0198      | 0.0396     |         |       |      |      |       | -1.07  | 1.05           | -1.03                                                                            | -1.13                                                                                    | <i>Abcb9</i>         | ATP-binding cassette, sub-family B (MDR/TAP), member 9                                    | 0006810 // transport // inferred from electronic annotation//0008152 // metabolic pro      |
| NM_0281      | 0.033      |         |       |      |      |       | -1.06  | 1.09           | -1.03                                                                            | -1.03                                                                                    | <i>Cep89</i>         | centrosomal protein 89                                                                    | 0030030 // cell projection organization // inferred from electronic annotation//0035058    |
| NM_0011      | 0.0477     |         |       |      |      |       | -1.33  | -1.83          | -1.03                                                                            | -1.41                                                                                    | <i>Cdkn1a</i>        | cyclin-dependent kinase inhibitor 1A (P21)                                                | 0000079 // regulation of cyclin-dependent protein serine/threonine kinase activity // infe |
| NM_0012      | 0.0167     |         |       |      |      |       | -1.05  | -1.41          | -1.03                                                                            | -1.20                                                                                    | <i>Jdp2</i>          | Jun dimerization protein 2                                                                | 0001122 // negative regulation of transcription from RNA polymerase II promoter // infer   |
| NM_1810      | 0.0142     |         |       |      |      |       | 1.08   | -1.09          | -1.03                                                                            | 1.05                                                                                     | <i>Adgr11</i>        | adhesion G protein-coupled receptor L1                                                    | 0007157 // heterophilic cell-cell adhesion via plasma membrane cell adhesion molecule      |
| NM_001168652 | //         | 0.05    | 0.033 |      |      |       | 1.10   | 1.06           | -1.03                                                                            | -1.01                                                                                    | <i>Gm20605</i>       | predicted gene 20605//leucine-rich repeats and calponin homology (CH) domain con          | 0006351 // transcription, DNA-templated // inferred from electronic annotation//00063      |
| NM_013581    | //XM       | 0.0653  | 0.022 | 1.02 | 1.06 | -1.03 | -1.05  | <i>Cog1</i>    | component of oligomeric golgi complex 1//conserved oligomeric Golgi complex subu | 0000301 // retrograde transport, vesicle recycling within Golgi // not recorded//0006811 |                      |                                                                                           |                                                                                            |
| XM_357640    | //XM       | 0.047   | 0.025 | 1.11 | 1.16 | -1.03 | -1.05  | <i>Igk-V21</i> | immunoglobulin kappa chain variable 21 (V21)//immunoglobulin kappa chain variabl | 0006898 // receptor-mediated endocytosis // not recorded//0006910 // phagocytosis, r     |                      |                                                                                           |                                                                                            |
| NM_001163633 | //NM_001   | 0.009   |       |      |      |       | 1.10   | 1.03           | -1.03                                                                            | -1.10                                                                                    | <i>Wnt7b</i>         | wingless-type MMTV integration site family, member 7B                                     | 0001525 // angiogenesis // inferred from genetic interaction//0001525 // angiogenesis ,    |
| NM_0011      | 0.0042     |         |       |      |      |       | 1.07   | -1.10          | -1.03                                                                            | -1.08                                                                                    | <i>Zfp746</i>        | zinc finger protein 746                                                                   | 0001122 // negative regulation of transcription from RNA polymerase II promoter // infer   |
| NM_053126    |            | 0.006   |       |      |      |       | -1.08  | -1.04          | -1.03                                                                            | 1.01                                                                                     | <i>Pcdhb1</i>        | protocadherin beta 1                                                                      | 0007155 // cell adhesion // inferred from electronic annotation//0007156 // homophilic     |
| NM_001291235 | //         | 0.002   |       |      |      |       | 1.15   | 1.01           | -1.03                                                                            | -1.04                                                                                    | <i>Tlcd1</i>         | TLC domain containing 1                                                                   |                                                                                            |
| NM_026645    | //XM       | 0.01124 | 0.017 |      |      |       | -1.10  | -1.08          | -1.03                                                                            | -1.04                                                                                    | <i>Iqcf3</i>         | IQ motif containing F3                                                                    |                                                                                            |
| NM_0109      | 0.0118     |         |       |      |      |       | 1.02   | 1.11           | -1.03                                                                            | -1.09                                                                                    | <i>Ntn3</i>          | netrin 3//TBC1 domain family, member 24                                                   | 0006355 // regulation of transcription, DNA-templated // not recorded//0007409 // axo      |
| NM_001081171 | //XM       | 0.006   | 0.045 |      |      |       | 1.04   | 1.05           | -1.03                                                                            | -1.07                                                                                    | <i>Lama5</i>         | laminin, alpha 5                                                                          | 0001658 // branching involved in ureteric bud morphogenesis // inferred from mutant pf     |
| NM_0079      | 0.0103     |         |       |      |      |       | -1.10  | 1.12           | -1.03                                                                            | -1.14                                                                                    | <i>Fscn1</i>         | fascin homolog 1, actin bundling protein (Strongylocentrotus purpuratus)                  | 0007015 // actin filament organization // inferred from electronic annotation//0007043     |
| NM_001145881 | //         | 0.026   |       |      |      |       | 1.11   | 1.05           | -1.03                                                                            | 1.10                                                                                     | <i>Zfp212</i>        | Zinc finger protein 212                                                                   | 0006355 // regulation of transcription, DNA-templated // inferred from electronic annotz   |
| NM_001029850 | //NM_001   | 0.037   |       |      |      |       | 1.06   | -1.01          | -1.03                                                                            | -1.12                                                                                    | <i>Magi1</i>         | membrane associated guanylate kinase, WW and PDZ domain containing 1                      | 0070997 // neuron death // not recorded                                                    |
| NM_0011      | 0.0278     |         |       |      |      |       | 1.06   | -1.11          | -1.03                                                                            | -1.02                                                                                    | <i>Mrps2</i>         | mitochondrial ribosomal protein S2                                                        | 0002230 // positive regulation of defense response to virus by host // not recorded//000   |
| NM_0205      | 0.0057     |         |       |      |      |       | 1.06   | -1.07          | -1.03                                                                            | -1.02                                                                                    | <i>Tas2r108</i>      | taste receptor, type 2, member 108                                                        | 0001580 // detection of chemical stimulus involved in sensory perception of bitter taste / |
| NM_1448      | 0.0261     | 0.012   | 0.04  |      |      |       | 1.16   | -1.09          | -1.03                                                                            | -1.06                                                                                    | <i>Nrbp2</i>         | nuclear receptor type binding protein 2                                                   | 0006468 // protein phosphorylation // inferred from electronic annotation//0007399 //      |
| NM_001290437 | //         | 0.04    | 0.043 |      |      |       | 1.07   | -1.01          | -1.03                                                                            | -1.03                                                                                    | <i>Inpp5e</i>        | inositol polyphosphate-5-phosphatase E                                                    | 0006470 // protein dephosphorylation // inferred from direct assay//0006470 // protei      |
| NM_145425    | //XM       | 0.0651  | 0.03  |      |      |       | -1.16  | -1.05          | -1.03                                                                            | 1.14                                                                                     | <i>Wdpcp</i>         | WD repeat containing planar cell polarity effector                                        | 0001822 // kidney development // inferred from mutant phenotype//0002093 // audit          |
| NM_001243762 | //NM_001   | 0.04    |       |      |      |       | -1.02  | -1.02          | -1.03                                                                            | -1.12                                                                                    | <i>Cln5</i>          | chloride channel 5                                                                        | 0006810 // transport // inferred from electronic annotation//0006811 // ion transport /    |
| NM_008916    | //XM       | 0.006   |       |      |      |       | 1.16   | 1.14           | -1.03                                                                            | 1.15                                                                                     | <i>Inpp5k</i>        | inositol polyphosphate 5-phosphatase K                                                    | 0001701 // in utero embryonic development // inferred from mutant phenotype//0001          |
| NM_0105      | 0.0031     | 0.041   |       |      |      |       | -1.17  | 1.20           | -1.03                                                                            | -1.20                                                                                    | <i>Il1r2</i>         | interleukin 1 receptor, type II                                                           | 0019221 // cytokine-mediated signaling pathway // inferred from electronic annotation      |
| NM_026490    |            | 0.013   |       |      |      |       | -1.18  | -1.03          | -1.03                                                                            | 1.10                                                                                     | <i>Mrp19</i>         | mitochondrial ribosomal protein L19                                                       | 0006412 // translation // inferred from sequence or structural similarity                  |
| NM_0114      | 0.0291     |         |       |      |      |       | -1.08  | -1.38          | -1.03                                                                            | 1.17                                                                                     | <i>Serpinh6b</i>     | serine (or cysteine) peptidase inhibitor, clade B, member 6b                              | 0008406 // gonad development // non-traceable author statement//0010951 // negativ         |
| NM_0137      | 0.0084     |         |       |      |      |       | 1.11   | 1.41           | -1.03                                                                            | -1.05                                                                                    | <i>Dok3</i>          | docking protein 3                                                                         | 0007265 // Ras protein signal transduction // inferred from direct assay                   |
| NM_0012      | 0.0029     | 0.008   |       |      |      |       | 1.21   | -1.01          | -1.03                                                                            | 1.02                                                                                     | <i>Bcl2l11</i>       | BCL2-like 11 (apoptosis facilitator)                                                      | 0001701 // in utero embryonic development // inferred from genetic interaction//0001       |
| NM_009697    | //NM       | 0.033   |       |      |      |       | 1.15   | 1.05           | -1.03                                                                            | 1.06                                                                                     | <i>Nr2f2</i>         | nuclear receptor subfamily 2, group F, member 2                                           | 0000122 // negative regulation of transcription from RNA polymerase II promoter // infer   |
| NM_0194      | 0.016      |         |       |      |      |       | -1.15  | 1.11           | -1.03                                                                            | 1.01                                                                                     | <i>Paf1</i>          | Paf1, RNA polymerase II associated factor, homolog (S. cerevisiae)                        | 0000122 // negative regulation of transcription from RNA polymerase II promoter // infer   |
| NM_0113      | 0.0078     |         |       |      |      |       | 1.08   | -1.13          | -1.03                                                                            | 1.00                                                                                     | <i>Slc22a5</i>       | solute carrier family 22 (organic cation transporter), member 5                           | 0006810 // transport // inferred from electronic annotation//0006811 // ion transport /    |
| NM_0011      | 0.0178     |         |       |      |      |       | 1.03   | -1.04          | -1.03                                                                            | -1.11                                                                                    | <i>Igf1bp7</i>       | insulin-like growth factor binding protein 7                                              | 0001558 // regulation of cell growth // inferred from electronic annotation//0007155 //    |
| NM_0080      | 0.0184     |         |       |      |      |       | -1.05  | 1.11           | -1.03                                                                            | 1.07                                                                                     | <i>Ftl1</i>          | ferritin light polypeptide 1//ferritin light polypeptide 2, pseudogene//ferritin light ch | 0006826 // iron ion transport // inferred from electronic annotation//0006879 // cellula   |
| NM_0082      | 0.0159     |         |       |      |      |       | -1.13  | 1.02           | -1.03                                                                            | -1.15                                                                                    | <i>Foxa3</i>         | forkhead box A3                                                                           | 0001678 // cellular glucose homeostasis // inferred from mutant phenotype//0006351 /       |
| NM_008468    | //XM       | 0.0650  | 0.011 |      |      |       | -1.05  | -1.02          | -1.03                                                                            | 1.07                                                                                     | <i>Kpna6</i>         | karyopherin (importin) alpha 6                                                            | 0006606 // protein import into nucleus // inferred from direct assay//0006607 // NLS-bi    |
| NM_0011      | #####      |         |       |      |      |       | -1.02  | -1.63          | -1.03                                                                            | 1.09                                                                                     | <i>Plod2</i>         | procollagen lysine, 2-oxoglutarate 5-dioxygenase 2                                        | 0001666 // response to hypoxia // inferred from electronic annotation//0032870 // celli    |

| RefSeq       | Tri.p       | 24h   | p     | 48h   | p     | 72h   | FD Air | FD 24h | FD 48h | FD 72h | Gene Symbol               | Gene Title                                                                        | Gene Ontology Biological Process                                                          |
|--------------|-------------|-------|-------|-------|-------|-------|--------|--------|--------|--------|---------------------------|-----------------------------------------------------------------------------------|-------------------------------------------------------------------------------------------|
| NM_001113470 | ///         | 0.025 | 1.08  | 1.16  | -1.03 | 1.04  |        |        |        |        | <b>Ctdsp2</b>             | CTD (carboxy-terminal domain, RNA polymerase II, polypeptide A) small phosphatase | 0001933 // negative regulation of protein phosphorylation // inferred from direct assay// |
| NM_0137      | 0.0072      |       | -1.01 | 1.16  | -1.03 | -1.10 |        |        |        |        | <b>Txnrd2</b>             | thioredoxin reductase 2                                                           | 0000305 // response to oxygen radical // traceable author statement//0007507 // heart     |
| NM_0011      | 0.0167      | 0.03  | 0.008 | 1.24  | 1.05  | -1.03 | -1.10  |        |        |        | <b>Slc16a11</b>           | solute carrier family 16 (monocarboxylic acid transporters), member 11            | 0006629 // lipid metabolic process // not recorded//0006810 // transport // inferred frc  |
| NM_001164062 | ///         | 0.019 | 1.14  | 1.20  | -1.03 | 1.10  |        |        |        |        | <b>Stat5a</b>             | signal transducer and activator of transcription 5A                               | 0000255 // allantoin metabolic process // inferred from mutant phenotype//0001553 //      |
| NM_0231      | #####       |       | -1.18 | 1.22  | -1.03 | -1.03 |        |        |        |        | <b>Arpc1b</b>             | actin related protein 2/3 complex, subunit 1B                                     | 0030833 // regulation of actin filament polymerization // inferred from electronic annota |
| NM_139236    | ///NM       | 0.004 | 1.08  | 1.05  | -1.03 | -1.01 |        |        |        |        | <b>Nol6</b>               | nucleolar protein family 6 (RNA-associated)                                       | 0006364 // rRNA processing // not recorded//0006409 // tRNA export from nucleus // n      |
| NM_0532      | 0.0486      |       | 1.01  | -1.05 | -1.03 | -1.02 |        |        |        |        | <b>Erc1</b>               | ELKS/RAB6-interacting/CAST family member 1                                        | 0006810 // transport // inferred from electronic annotation//0007252 // I-kappaB phos     |
| NM_025476    | ///XR       | 0.007 | 1.27  | 1.15  | -1.03 | 1.08  |        |        |        |        | <b>Rmdn1</b>              | regulator of microtubule dynamics 1                                               |                                                                                           |
| NM_0090      | 0.0496      |       | 1.08  | -1.10 | -1.03 | -1.03 |        |        |        |        | <b>Rel</b>                | reticuloendotheliosis oncogene                                                    | 0000122 // negative regulation of transcription from RNA polymerase II promoter // not r  |
| NM_0236      | 0.0143      |       | -1.00 | 1.13  | -1.03 | -1.04 |        |        |        |        | <b>Sars2</b>              | seryl-aminoacyl-tRNA synthetase 2                                                 | 0006412 // translation // inferred from electronic annotation//0006418 // tRNA aminoa     |
| NM_0080      | 0.0301      |       | 1.13  | -1.01 | -1.03 | 1.15  |        |        |        |        | <b>Fzd7</b>               | frizzled homolog 7 (Drosophila)                                                   | 0006355 // regulation of transcription, DNA-templated // not recorded//0007165 // sigr    |
| NM_001301100 | ///NM_18    | 0.003 | 1.15  | 1.04  | -1.03 | -1.06 |        |        |        |        | <b>Edc4</b>               | enhancer of mRNA decapping 4                                                      |                                                                                           |
| NM_0011      | 0.0099      |       | -1.03 | -1.17 | -1.02 | 1.24  |        |        |        |        | <b>Cep55</b>              | centrosomal protein 55                                                            | 0000281 // mitotic cytokinesis // not recorded//0000920 // cell separation after cytokin  |
| NM_001290740 | ///         | 0.031 | 1.28  | 1.07  | -1.02 | 1.24  |        |        |        |        | <b>Cwc22</b> ///Xdh       | CWC22 spliceosome-associated protein homolog (S. cerevisiae)///xanthine dehydroge | 0000398 // mRNA splicing, via spliceosome // not recorded//0001933 // negative regula     |
| NM_013905    |             | 0.005 | 1.12  | 1.05  | -1.02 | 1.24  |        |        |        |        | <b>Heyl</b>               | hairly/enhancer-of-split related with YRPW motif-like                             | 0003151 // outflow tract morphogenesis // inferred from genetic interaction//0003181 .    |
| NM_0085      | 0.0441      | ##### | 1.04  | -1.08 | -1.02 | -1.17 |        |        |        |        | <b>Lor</b>                | loricrin                                                                          | 0031424 // keratinization // inferred from electronic annotation                          |
| NM_0012      | 0.0201      |       | 1.03  | -1.06 | -1.02 | -1.11 |        |        |        |        | <b>Ngb</b>                | neuroglobin                                                                       | 0006810 // transport // inferred from electronic annotation//0006915 // apoptotic proc    |
| NM_0012      | 0.0031      |       | -1.02 | -1.13 | -1.02 | 1.00  |        |        |        |        | <b>Ncor1</b>              | nuclear receptor co-repressor 1                                                   | 0000122 // negative regulation of transcription from RNA polymerase II promoter // infer  |
| NM_1786      | 0.0059      |       | 1.08  | -1.10 | -1.02 | 1.07  |        |        |        |        | <b>Poldip3</b>            | polymerase (DNA-directed), delta interacting protein 3                            | 0006417 // regulation of translation // inferred from electronic annotation//0006810 //   |
| NM_1386      | 0.0021      |       | 1.04  | -1.03 | -1.02 | 1.16  |        |        |        |        | <b>Casc3</b>              | cancer susceptibility candidate 3                                                 | 000184 // nuclear-transcribed mRNA catabolic process, nonsense-mediated decay // inf      |
| NM_199467    | ///XM_00653 | 0.043 | -1.04 | 1.06  | -1.02 | 1.18  |        |        |        |        | <b>Mms22l</b>             | MMS22-like, DNA repair protein                                                    | 0000724 // double-strand break repair via homologous recombination // not recorded//      |
| NM_0010      | 0.0459      |       | 1.17  | -1.02 | -1.02 | -1.16 |        |        |        |        | <b>Cracr2b</b>            | calcium release activated channel regulator 2B                                    | 0002115 // store-operated calcium entry // not recorded//0034613 // cellular protein Ic   |
| NM_0010      | 0.0343      |       | -1.07 | 1.12  | -1.02 | 1.05  |        |        |        |        | <b>Spryd3</b>             | SPRY domain containing 3                                                          |                                                                                           |
| NM_011505    | ///XM       | 0.025 | 0.022 | -1.11 | -1.14 | -1.02 |        |        |        |        | <b>Stxbp4</b>             | syntaxin binding protein 4                                                        | 0006605 // protein targeting // inferred from direct assay//0006974 // cellular response  |
| NM_0223      | 0.0266      | 0.008 | 1.12  | -1.03 | -1.02 | -1.19 |        |        |        |        | <b>Slc28a3</b>            | solute carrier family 28 (sodium-coupled nucleoside transporter), member 3        | 0001895 // retina homeostasis // not recorded//0006810 // transport // inferred from e    |
| NM_053185    | ///XM_01124 | 0.009 | -1.01 | -1.05 | -1.02 | 1.10  |        |        |        |        | <b>Col4a6</b>             | collagen, type IV, alpha 6                                                        | 0030198 // extracellular matrix organization // inferred from direct assay//0071230 // c  |
| NM_0117      | 0.0376      |       | -1.03 | -1.20 | -1.02 | 1.02  |        |        |        |        | <b>Ywhah</b>              | tyrosine 3-monooxygenase/tryptophan 5-monooxygenase activation protein, eta poly  | 0002028 // regulation of sodium ion transport // not recorded//0002028 // regulation o    |
| NM_0010      | 0.0283      |       | -1.02 | -1.09 | -1.02 | -1.05 |        |        |        |        | <b>Purg</b>               | purine-rich element binding protein G                                             |                                                                                           |
| NM_009160    |             | 0.014 | -1.04 | -1.03 | -1.02 | 1.13  |        |        |        |        | <b>Sftpd</b>              | surfactant associated protein D                                                   | 0002376 // immune system process // inferred from electronic annotation//0007585 //       |
| NM_0012      | 0.0014      |       | 1.18  | -1.25 | -1.02 | 1.30  |        |        |        |        | <b>Alas1</b>              | aminolevulinic acid synthase 1                                                    | 0006778 // porphyrin-containing compound metabolic process // inferred from electroni     |
| NM_011359    |             | 0.02  | -1.04 | -1.05 | -1.02 | -1.03 |        |        |        |        | <b>Sftpc</b>              | surfactant associated protein C                                                   | 0007585 // respiratory gaseous exchange // inferred from electronic annotation//00076     |
| NM_001252448 | ///NM_00    | 0.045 | -1.03 | 1.03  | -1.02 | 1.07  |        |        |        |        | <b>Strada</b>             | STE20-related kinase adaptor alpha                                                | 0006468 // protein phosphorylation // inferred from electronic annotation//0006611 //     |
| NM_1387      | 0.0453      |       | 1.11  | -1.10 | -1.02 | 1.23  |        |        |        |        | <b>Sdpr</b>               | serum deprivation response                                                        | 0045944 // positive regulation of transcription from RNA polymerase II promoter // not r  |
| NM_139236    | ///NM_13923 | 0.022 | 1.08  | 1.08  | -1.02 | -1.01 |        |        |        |        | <b>Nol6</b>               | nucleolar protein family 6 (RNA-associated)                                       | 0006364 // rRNA processing // not recorded//0006409 // tRNA export from nucleus // n      |
| NM_0199      | 0.0434      |       | 1.03  | -1.11 | -1.02 | -1.03 |        |        |        |        | <b>Alg2</b>               | asparagine-linked glycosylation 2 (alpha-1,3-mannosyltransferase)                 | 0006486 // protein glycosylation // inferred from electronic annotation//0006488 // dol   |
| NM_001078649 | ///         | 0.049 | 1.09  | 1.14  | -1.02 | -1.06 |        |        |        |        | <b>Tmem134</b>            | transmembrane protein 134                                                         |                                                                                           |
| NM_001311156 | ///         | 0.025 | 1.09  | 1.10  | -1.02 | 1.05  |        |        |        |        | <b>Tcta</b>               | T cell leukemia translocation altered gene                                        |                                                                                           |
| NM_0114      | 0.0239      |       | -1.14 | 1.47  | -1.02 | -1.09 |        |        |        |        | <b>Sifn1</b>              | schlafen 1                                                                        | 0000122 // negative regulation of transcription from RNA polymerase II promoter // infer  |
| NM_0090      | 0.0028      |       | -1.10 | 1.80  | -1.02 | 1.04  |        |        |        |        | <b>Rac2</b>               | RAS-related C3 botulinum substrate 2                                              | 0006935 // chemotaxis // inferred from direct assay//0007015 // actin filament organiz    |
| NM_0187      | 0.0387      |       | -1.05 | 1.10  | -1.02 | -1.08 |        |        |        |        | <b>Nme6</b>               | NME/NM23 nucleoside diphosphate kinase 6                                          | 0006165 // nucleoside diphosphate phosphorylation // inferred from electronic annotati    |
| NM_1531      | 0.0348      |       | -1.04 | 1.18  | -1.02 | -1.02 |        |        |        |        | <b>Phospho1</b> ///Zfp652 | phosphatase, orphan 1///zinc finger protein 652                                   | 0001958 // mitochondrial ossification // inferred from mutant phenotype//0006351 // t     |
| NM_0312      | 0.0199      |       | 1.04  | 1.35  | -1.02 | 1.05  |        |        |        |        | <b>Gimap3</b>             | GTPase, IMAP family member 3                                                      | 0033955 // mitochondrial DNA inheritance // inferred from mutant phenotype                |
| NM_001291047 | ///NM_00    | 0.047 | 1.03  | 1.01  | -1.02 | -1.08 |        |        |        |        | <b>Ypel1</b>              | yippee-like 1 (Drosophila)                                                        |                                                                                           |
| NM_1990      | 0.0184      |       | 1.14  | -1.14 | -1.02 | 1.00  |        |        |        |        | <b>Stard8</b>             | START domain containing 8                                                         | 0007165 // signal transduction // inferred from electronic annotation//0043547 // posit   |
| NM_008581    |             | 0.025 | 1.15  | 1.02  | -1.02 | 1.04  |        |        |        |        | <b>Mela</b>               | melanoma antigen                                                                  | 0006508 // proteolysis // inferred from electronic annotation//0015074 // DNA integrat    |
| NM_0010      | 0.0038      | 0.013 | 0.043 | 1.10  | -1.04 | -1.02 |        |        |        |        | <b>Cdc42bpa</b>           | CDC42 binding protein kinase alpha                                                | 0000226 // microtubule cytoskeleton organization // inferred from mutant phenotype//      |
| NM_0280      | 0.0143      |       | 1.02  | 1.18  | -1.02 | -1.22 |        |        |        |        | <b>Ddx54</b>              | DEAD (Asp-Glu-Ala-Asp) box polypeptide 54                                         | 0006351 // transcription, DNA-templated // inferred from electronic annotation//00063     |
| NM_0272      | 0.0361      | 0.012 | 1.10  | -1.03 | -1.02 | -1.16 |        |        |        |        | <b>Ppp1r35</b>            | protein phosphatase 1, regulatory subunit 35                                      | 0010923 // negative regulation of phosphatase activity // not recorded                    |
| NM_0335      | 0.0084      |       | 1.08  | -1.11 | -1.02 | 1.04  |        |        |        |        | <b>Aff4</b>               | AF4/FMR2 family, member 4                                                         | 0006351 // transcription, DNA-templated // inferred from electronic annotation//00063     |
| NM_017401    | ///XM_00651 | 0.039 | 1.14  | 1.17  | -1.02 | -1.05 |        |        |        |        | <b>Polm</b>               | polymerase (DNA directed), mu                                                     | 0006281 // DNA repair // inferred from electronic annotation//0006310 // DNA recomb       |
| NM_0231      | 0.0402      |       | 1.05  | 1.14  | -1.02 | -1.16 |        |        |        |        | <b>Map2k2</b>             | mitogen-activated protein kinase kinase 2                                         | 0000165 // MAPK cascade // not recorded//0000187 // activation of MAPK activity // tr     |
| NM_019435    | ///XM_00652 | 0.039 | 1.01  | -1.03 | -1.02 | -1.04 |        |        |        |        | <b>Ndufb11</b>            | NADH dehydrogenase (ubiquinone) 1 beta subcomplex, 11                             | 0006810 // transport // inferred from electronic annotation//0055114 // oxidation-redu    |
| NM_0011      | 0.0257      |       | -1.09 | -1.39 | -1.02 | -1.02 |        |        |        |        | <b>Grlh1</b>              | grainyhead-like 1 (Drosophila)                                                    | 0006351 // transcription, DNA-templated // inferred from electronic annotation//00063     |
| NM_029342    |             | 0.044 | 1.12  | 1.03  | -1.02 | -1.12 |        |        |        |        | <b>Nhej1</b>              | nonhomologous end-joining factor 1                                                | 0006281 // DNA repair // inferred from electronic annotation//0006302 // double-stran     |
| NM_0105      | 0.0024      |       | 1.11  | -1.10 | -1.02 | 1.00  |        |        |        |        | <b>Il17a</b>              | interleukin 17A                                                                   | 0006954 // inflammatory response // inferred from electronic annotation//0007166 // c     |
| NM_0012      | 0.0024      |       | -1.04 | 1.19  | -1.02 | -1.20 |        |        |        |        | <b>Blnrb</b>              | biliverdin reductase B (flavin reductase (NADPH))                                 | 0042167 // heme catabolic process // not recorded//0055114 // oxidation-reduction pr      |
| NM_023058    | ///XM_00652 | 0.048 | 1.02  | 1.01  | -1.02 | -1.09 |        |        |        |        | <b>Pkmyt1</b>             | protein kinase, membrane associated tyrosine/threonine 1                          | 0006468 // protein phosphorylation // inferred from electronic annotation//0007049 //     |
| NM_008106    | ///XM_00652 | 0.048 | 1.07  | 1.01  | -1.02 | -1.12 |        |        |        |        | <b>Opn1mw</b>             | opsin 1 (cone pigments), medium-wave-sensitive (color blindness, deutan)          | 0007165 // signal transduction // inferred from electronic annotation//0007186 // G-pr    |
| NM_0011      | 0.0203      |       | 1.04  | -1.18 | -1.02 | 1.06  |        |        |        |        | <b>Sec14l1</b>            | SEC14-like lipid binding 1                                                        | 0006810 // transport // inferred from electronic annotation                               |
| NM_008168    | ///XM_00653 | 0.007 | 1.18  | -1.01 | -1.02 | -1.17 |        |        |        |        | <b>Grik5</b>              | glutamate receptor, ionotropic, kainate 5 (gamma 2)                               | 0006621 // protein retention in ER lumen // not recorded//0006810 // transport // infer   |
| NM_1337      | 0.0185      | 0.022 | 1.21  | -1.02 | -1.02 | 1.27  |        |        |        |        | <b>Ctdsp1</b>             | CTD (carboxy-terminal domain, RNA polymerase II, polypeptide A) small phosphatase | 0001933 // negative regulation of protein phosphorylation // inferred from direct assay// |
| NM_1755      | 0.045       |       | 1.00  | -1.12 | -1.02 | -1.02 |        |        |        |        | <b>Wdfy2</b>              | WD repeat and FYVE domain containing 2                                            | 0001934 // positive regulation of protein phosphorylation // not recorded//0045600 //     |
| NM_0194      | 0.0167      |       | 1.05  | 1.31  | -1.02 | 1.06  |        |        |        |        | <b>Atf7ip</b>             | activating transcription factor 7 interacting protein                             | 0000122 // negative regulation of transcription from RNA polymerase II promoter // infer  |
| NM_001166273 | ///NM_01    | 0.012 | -1.00 | -1.13 | -1.02 | -1.22 |        |        |        |        | <b>Cspg5</b>              | chondroitin sulfate proteoglycan 5                                                | 0002230 // positive regulation of defense response to virus by host // not recorded//000  |

| RefSeq       | Tri        | p 24h | p 48h | p 72h | FD Air | FD 24h | FD 48h | FD 72h | Gene Symbol    | Gene Title                                                                | Gene Ontology Biological Process                                                           |
|--------------|------------|-------|-------|-------|--------|--------|--------|--------|----------------|---------------------------------------------------------------------------|--------------------------------------------------------------------------------------------|
| NM_009320    | //XM       | 0.03  |       |       | 1.17   | 1.20   | -1.02  | 1.12   | <i>Slc6a6</i>  | solute carrier family 6 (neurotransmitter transporter, taurine), member 6 | 0001762 // beta-alanine transport // inferred from direct assay//0006810 // transport //   |
| NM_0010      | 0.0407     |       |       |       | 1.03   | -1.60  | -1.02  | 1.01   | <i>Edem3</i>   | ER degradation enhancer, mannosidase alpha-like 3                         | 0006491 // N-glycan processing // not recorded//0006516 // glycoprotein catabolic pro      |
| NM_0118      | 0.0351     |       |       |       | 1.00   | 1.09   | -1.02  | -1.01  | <i>Lamc3</i>   | laminin gamma 3                                                           | 0000904 // cell morphogenesis involved in differentiation // inferred from genetic interac |
| NM_0010      | 0.0023     |       |       |       | -1.01  | -1.13  | -1.02  | 1.14   | <i>Kat6a</i>   | K(lysine) acetyltransferase 6A                                            | 0003007 // heart morphogenesis // inferred from genetic interaction//0003007 // heart      |
| NM_1336      | 0.0378     |       |       |       | -1.03  | 1.12   | -1.02  | 1.08   | <i>Ndufv1</i>  | NADH dehydrogenase (ubiquinone) flavoprotein 1                            | 0006120 // mitochondrial electron transport, NADH to ubiquinone // --//0006810 // tr       |
| NM_1530      | 0.0286     |       |       |       | 1.04   | -1.10  | -1.02  | -1.07  | <i>Gprc6a</i>  | G protein-coupled receptor, family C, group 6, member A                   | 0007165 // signal transduction // inferred from electronic annotation//0007186 // G-pr     |
| NM_008868    |            | 0.009 |       |       | 1.07   | 1.05   | -1.02  | -1.15  | <i>Pla2g2c</i> | phospholipase A2, group IIC                                               | 0006629 // lipid metabolic process // inferred from electronic annotation//0006644 // p    |
| NM_0086      | 0.028      |       |       |       | -1.20  | 1.07   | -1.02  | 1.04   | <i>Mmp8</i>    | matrix metalloproteinase 8                                                | 0006508 // proteolysis // not recorded//0030574 // collagen catabolic process // inferre   |
| NM_0085      | 0.0055     |       |       |       | 1.02   | -1.25  | -1.02  | 1.08   | <i>Smad1</i>   | SMAD family member 1                                                      | 0000165 // MAPK cascade // inferred from mutant phenotype//0000165 // MAPK casca           |
| NM_0262      | 0.038      |       |       |       | 1.08   | -1.04  | -1.02  | 1.01   | <i>H2afy2</i>  | H2A histone family, member Y2                                             | 0000122 // negative regulation of transcription from RNA polymerase II promoter // not r   |
| NM_0010      | 0.0412     |       |       |       | -1.07  | -1.02  | -1.02  | -1.09  | <i>Rpf2</i>    | ribosome production factor 2 homolog (S. cerevisiae)                      | 0000027 // ribosomal large subunit assembly // not recorded//0000463 // maturation o       |
| NM_0010      | 0.046      |       |       |       | 1.04   | -1.03  | -1.02  | 1.05   | <i>Strn4</i>   | striatin, calmodulin binding protein 4                                    |                                                                                            |
|              |            | 0.019 |       |       | -1.06  | -1.04  | -1.02  | -1.12  | <i>C78228</i>  | expressed sequence C78228                                                 |                                                                                            |
| NM_001130150 | //         | 0.016 | 0.049 |       | 1.26   | 1.25   | -1.02  | 1.03   | <i>Arhgef1</i> | Rho guanine nucleotide exchange factor (GEF) 1                            | 0035023 // regulation of Rho protein signal transduction // inferred from electronic anno  |
| NM_0276      | 0.0086     |       |       |       | -1.03  | -1.29  | -1.02  | -1.06  | <i>Psd3</i>    | pleckstrin and Sec7 domain containing 3                                   | 0016192 // vesicle-mediated transport // --//0030182 // neuron differentiation // not r    |
| NM_1389      | 0.0223     |       |       |       | 1.05   | -1.07  | -1.02  | -1.05  | <i>Wdr81</i>   | WD repeat domain 81                                                       | 0000132 // establishment of mitotic spindle orientation // not recorded//0007097 // nu     |
| NM_1337      | 0.0357     |       | 0.046 |       | -1.02  | 1.13   | -1.02  | 1.06   | <i>Ptcd1</i>   | pentatricopeptide repeat domain 1                                         | 0008033 // tRNA processing // inferred from electronic annotation//0042780 // tRNA 3'      |
|              | 0.0302     |       | 0.008 |       | 1.05   | -1.06  | -1.02  | -1.10  | <i>C80012</i>  | expressed sequence C80012                                                 |                                                                                            |
| NM_001081065 | //XM_006   | 0.008 |       |       | 1.09   | 1.08   | -1.02  | -1.03  | <i>Zfp707</i>  | zinc finger protein 707                                                   | 0006355 // regulation of transcription, DNA-templated // not recorded                      |
| NM_0010      | 0.0124     |       |       |       | 1.11   | 1.66   | -1.02  | -1.02  | <i>Cd22</i>    | CD22 antigen                                                              | 0007155 // cell adhesion // inferred from electronic annotation//0007166 // cell surface   |
| NM_010213    | //XM_00650 | 0.037 |       |       | -1.00  | 1.10   | -1.02  | -1.28  | <i>Fhl3</i>    | four and a half LIM domains 3                                             | 0030036 // actin cytoskeleton organization // inferred from direct assay                   |
| NM_0010      | 0.0316     |       |       |       | 1.04   | -1.23  | -1.02  | 1.16   | <i>Cep350</i>  | centrosomal protein 350                                                   | 0034453 // microtubule anchoring // inferred from electronic annotation                    |
| NM_0214      | 0.004      | 0.05  |       |       | 1.08   | -1.12  | -1.02  | -1.01  | <i>Rnase4</i>  | ribonuclease, RNase A family 4                                            | 0001525 // angiogenesis // inferred from electronic annotation//0001525 // angiogenes      |
| NM_018762    | //XM_00650 | 0.038 |       |       | 1.00   | 1.06   | -1.02  | -1.18  | <i>Gp9</i>     | glycoprotein 9 (platelet)                                                 | 0007155 // cell adhesion // inferred from electronic annotation//0007596 // blood coag     |
| NM_1448      | #####      |       |       |       | 1.08   | -1.20  | -1.02  | 1.04   | <i>Rprd1a</i>  | regulation of nuclear pre-mRNA domain containing 1A                       | 0070940 // dephosphorylation of RNA polymerase II C-terminal domain // not recorded        |
| NM_013876    | //XM       | 0.043 |       |       | 1.12   | -1.05  | -1.02  | -1.12  | <i>Rnf11</i>   | ring finger protein 11                                                    | 0006511 // ubiquitin-dependent protein catabolic process // inferred from physical inter   |
| NM_020283    | //XM_00649 | 0.016 |       |       | 1.12   | 1.01   | -1.02  | -1.12  | <i>B3galt1</i> | UDP-Gal:betaGlcNAc beta 1,3-galactosyltransferase, polypeptide 1          | 0006486 // protein glycosylation // not recorded//0009312 // oligosaccharide biosynthe     |
| NM_0013      | 0.0021     |       |       |       | 1.02   | -1.18  | -1.02  | 1.22   | <i>Pmp22</i>   | peripheral myelin protein 22                                              | 0007049 // cell cycle // inferred from electronic annotation//0007050 // cell cycle arrest |
| NM_019685    |            | 0.012 |       |       | -1.12  | -1.06  | -1.02  | 1.03   | <i>Ruvb1</i>   | RuvB-like protein 1                                                       | 0006281 // DNA repair // inferred from electronic annotation//0006310 // DNA recomb        |
| NM_0013      | 0.0126     |       |       |       | -1.04  | 1.19   | -1.02  | 1.02   | <i>Csk</i>     | c-src tyrosine kinase                                                     | 0001817 // regulation of cytokine production // not recorded//0002009 // morphogene        |
| NM_001001297 | //NM_17    | 0.023 |       |       | -1.05  | 1.06   | -1.02  | 1.09   | <i>Thns1</i>   | threonine synthase-like 1 (bacterial)                                     | 0009088 // threonine biosynthetic process // not recorded                                  |
| NM_0010      | 0.0114     |       |       |       | 1.00   | -1.09  | -1.01  | 1.08   | <i>Hsd11b1</i> | hydroxysteroid 11-beta dehydrogenase 1                                    | 0006629 // lipid metabolic process // inferred from electronic annotation//0006704 // g    |
| NM_018775    | //XM       | 0.013 |       |       | -1.41  | -1.41  | -1.01  | -1.11  | <i>Tbc1d8</i>  | TBC1 domain family, member 8                                              | 0043547 // positive regulation of GTPase activity // inferred from electronic annotation   |
| NM_026585    | //XM_00650 | 0.013 |       |       | -1.01  | 1.02   | -1.01  | 1.13   | <i>Fam21</i>   | family with sequence similarity 21                                        | 0006810 // transport // inferred from electronic annotation//0015031 // protein transp     |
| NM_029645    |            | 0.023 |       |       | 1.06   | -1.01  | -1.01  | -1.07  | <i>Gatc</i>    | glutamyl-tRNA(Gln) amidotransferase, subunit C                            | 0006412 // translation // inferred from electronic annotation//0006450 // regulation of    |
| NM_0086      | 0.0439     |       |       |       | -1.02  | 1.41   | -1.01  | -1.04  | <i>Ncf4</i>    | neutrophil cytosolic factor 4                                             | 0043085 // positive regulation of catalytic activity // not recorded                       |
| NM_1336      | 0.0211     |       |       |       | -1.00  | -1.14  | -1.01  | 1.06   | <i>Arhgef5</i> | Rho guanine nucleotide exchange factor (GEF) 5                            | 0002408 // myeloid dendritic cell chemotaxis // inferred from mutant phenotype//0030       |
| NM_0075      | 0.003      |       |       |       | -1.05  | 1.20   | -1.01  | 1.00   | <i>Bid</i>     | BH3 interacting domain death agonist                                      | 0001836 // release of cytochrome c from mitochondria // inferred from direct assay//0C     |
| NM_0238      | 0.0408     | 0.008 |       |       | -1.14  | 1.04   | -1.01  | -1.06  | <i>Retnlb</i>  | resistin like beta                                                        |                                                                                            |
| NM_0010      | 0.009      |       |       |       | 1.01   | -1.24  | -1.01  | 1.00   | <i>Brd1</i>    | bromodomain containing 1                                                  | 0035902 // response to immobilization stress // inferred from electronic annotation//0C    |
| NM_1337      | 0.0456     |       | 0.035 |       | 1.13   | -1.01  | -1.01  | -1.07  | <i>Fam131a</i> | family with sequence similarity 131, member A                             |                                                                                            |
| NM_001205043 | //         | 0.04  |       |       | 1.14   | 1.09   | -1.01  | 1.05   | <i>Jarid2</i>  | jumonji, AT rich interactive domain 2                                     | 0000122 // negative regulation of transcription from RNA polymerase II promoter // infer   |
| NM_0099      | 0.0366     |       |       |       | -1.00  | 1.10   | -1.01  | 1.05   | <i>Dpysl2</i>  | dihydropyrimidinase-like 2                                                | 0001975 // response to amphetamine // inferred from electronic annotation//0006897         |
| NM_008553    |            | 0.048 |       |       | 1.06   | -1.11  | -1.01  | -1.15  | <i>Ascl1</i>   | achaete-scute complex homolog 1 (Drosophila)                              | 0000122 // negative regulation of transcription from RNA polymerase II promoter // not r   |
| NM_0253      | 0.0397     |       |       |       | 1.01   | 1.18   | -1.01  | -1.07  | <i>Sharpin</i> | SHANK-associated RH domain interacting protein                            | 0007005 // mitochondrion organization // inferred from mutant phenotype//0007420 //        |
| NM_0011      | 0.0309     |       |       |       | 1.03   | -1.10  | -1.01  | 1.02   | <i>Aamd1c</i>  | adipogenesis associated Mth938 domain containing                          | 0043066 // negative regulation of apoptotic process // inferred from mutant phenotype//    |
| NM_0012      | 0.0059     |       |       |       | 1.03   | -1.10  | -1.01  | 1.01   | <i>Thsd1</i>   | thrombospondin, type I, domain 1                                          | 0002244 // hematopoietic progenitor cell differentiation // inferred from genetic interact |
| NM_028354    | //XM_00651 | 0.035 |       |       | 1.01   | 1.02   | -1.01  | 1.07   | <i>Tdp1</i>    | tyrosyl-DNA phosphodiesterase 1                                           | 0000012 // single strand break repair // inferred from mutant phenotype//0000012 // si     |
| NM_026058    | //XM       | 0.011 |       |       | 1.22   | 1.18   | -1.01  | 1.17   | <i>Cers4</i>   | ceramide synthase 4                                                       | 0006629 // lipid metabolic process // inferred from electronic annotation//00030148 // s   |
| NM_022031    | //XM_00650 | 0.047 |       |       | 1.04   | 1.01   | -1.01  | -1.14  | <i>Hapln2</i>  | hyaluronan and proteoglycan link protein 2                                | 0001501 // skeletal system development // not recorded//0007155 // cell adhesion // n      |
| NM_0013      | 0.0199     |       |       |       | 1.04   | 1.41   | -1.01  | -1.03  | <i>Cyba</i>    | cytochrome b-245, alpha polypeptide                                       | 0001938 // positive regulation of endothelial cell proliferation // not recorded//000310   |
| NM_001161428 | //         | 0.036 | 0.044 |       | 1.10   | 1.17   | -1.01  | -1.10  | <i>Unc93b1</i> | unc-93 homolog B1 (C. elegans)                                            | 0002224 // toll-like receptor signaling pathway // inferred from mutant phenotype//00C     |
| NM_001313888 | //NM_00    | 0.028 |       |       | -1.07  | 1.00   | -1.01  | 1.04   | <i>Ii7</i>     | interleukin 7                                                             | 0002360 // T cell lineage commitment // inferred from mutant phenotype//0006955 // i       |
| NM_0012      | 0.0398     |       |       |       | 1.02   | -1.04  | -1.01  | 1.20   | <i>Kif1b</i>   | kinesin family member 1B                                                  | 0007018 // microtubule-based movement // inferred from direct assay//0007270 // neu        |
| NM_0107      | 0.0283     |       |       |       | -1.02  | -1.29  | -1.01  | -1.15  | <i>Mxd4</i>    | Max dimerization protein 4                                                | 0006351 // transcription, DNA-templated // inferred from electronic annotation//00063      |
| NM_001033175 |            | 0.031 |       |       | 1.12   | 1.07   | -1.01  | 1.16   | <i>Cln6</i>    | ceroid-lipofuscinosis, neuronal 6                                         | 0001573 // ganglioside metabolic process // not recorded//0001573 // ganglioside met       |
| NM_0197      | 0.0378     |       |       |       | 1.01   | -1.09  | -1.01  | -1.09  | <i>Nme4</i>    | NME/NM23 nucleoside diphosphate kinase 4                                  | 0006163 // purine nucleotide metabolic process // not recorded//0006165 // nucleosid       |
| NM_008572    | //XM_00651 | 0.024 |       |       | -1.14  | 1.10   | -1.01  | -1.14  | <i>Mcpt8</i>   | mast cell protease 8                                                      | 0006508 // proteolysis // inferred from electronic annotation//0006955 // immune resp      |
| NM_027493    | //XM_00651 | 0.045 |       |       | 1.03   | 1.07   | -1.01  | 1.14   | <i>Actr8</i>   | ARPB actin-related protein 8                                              | 0006281 // DNA repair // inferred from electronic annotation//0006310 // DNA recomb        |
| NM_008052    | //XM_01124 | 0.049 |       |       | 1.04   | 1.07   | -1.01  | -1.18  | <i>Dtx1</i>    | deltex 1 homolog (Drosophila)                                             | 0007219 // Notch signaling pathway // inferred from direct assay//0007219 // Notch sig     |
| NM_0010      | 0.0056     |       |       |       | 1.02   | -1.12  | -1.01  | 1.05   | <i>Fhl1</i>    | four and a half LIM domains 1                                             | 0003254 // regulation of membrane depolarization // not recorded//0007275 // multic        |
| NM_0012      | 0.0092     |       |       |       | 1.13   | 1.03   | -1.01  | 1.19   | <i>Jund</i>    | jun D proto-oncogene                                                      | 0000122 // negative regulation of transcription from RNA polymerase II promoter // not r   |
| NM_133823    | //XM_00653 | 0.027 |       |       | 1.02   | -1.15  | -1.01  | 1.26   | <i>Mmaa</i>    | methylmalonic aciduria (cobalamin deficiency) type A                      | 0009236 // cobalamin biosynthetic process // inferred from electronic annotation           |
| NM_0011      | 0.0057     |       |       |       | 1.01   | 1.32   | -1.01  | 1.07   | <i>Meis1</i>   | Meis homeobox 1                                                           | 0001525 // angiogenesis // inferred from mutant phenotype//0002089 // lens morphog         |

| RefSeq       | Tri         | p 24h  | p 48h | p 72h | FD Air | FD 24h | FD 48h | FD 72h | Gene Symbol                      | Gene Title                                                                            | Gene Ontology Biological Process                                                          |
|--------------|-------------|--------|-------|-------|--------|--------|--------|--------|----------------------------------|---------------------------------------------------------------------------------------|-------------------------------------------------------------------------------------------|
| NM_0265      |             | 0.0382 |       |       | 1.24   | -1.14  | -1.01  | 1.10   | <i>Upf3b</i>                     | UPF3 regulator of nonsense transcripts homolog B (yeast)                              | 0000184 // nuclear-transcribed mRNA catabolic process, nonsense-mediated decay // no      |
| NM_0010      |             | 0.0343 |       |       | 1.03   | 1.35   | -1.01  | 1.07   | <i>Pgd</i>                       | phosphogluconate dehydrogenase                                                        | 0005975 // carbohydrate metabolic process // not recorded//0006098 // pentose-phos        |
| NM_0010      |             | 0.0214 |       |       | 1.06   | -1.10  | -1.01  | 1.03   | <i>Mecp2</i>                     | methyl CpG binding protein 2                                                          | 0000122 // negative regulation of transcription from RNA polymerase II promoter // not r  |
| NM_0110      |             | 0.036  |       |       | 1.13   | -1.08  | -1.01  | -1.08  | <i>Phex</i>                      | phosphate regulating endopeptidase homolog, X-linked                                  | 0006508 // proteolysis // not recorded//0019637 // organophosphate metabolic proces       |
| NM_010108    | //XM_00650  | 0.015  |       |       | 1.07   | 1.03   | -1.01  | 1.15   | <i>Efna3</i>                     | ephrin A3                                                                             | 0007411 // axon guidance // not recorded//0045664 // regulation of neuron differentia     |
| NM_0011      |             | 0.012  |       |       | 1.09   | -1.11  | -1.01  | 1.11   | <i>Rnf146</i>                    | ring finger protein 146                                                               | 0016055 // Wnt signaling pathway // inferred from electronic annotation//0016567 // p     |
| NM_0200      |             | 0.0249 |       |       | -1.04  | 1.06   | -1.01  | -1.07  | <i>Dhodh</i>                     | dihydroorotate dehydrogenase                                                          | 0006207 // 'de novo' pyrimidine nucleobase biosynthetic process // not recorded//0006     |
| NM_145540    | //NM_17887  | 0.046  |       |       | -1.17  | -1.13  | -1.01  | 1.05   | <i>Ints3</i>                     | integrator complex subunit 3                                                          | 0006281 // DNA repair // not recorded//0006974 // cellular response to DNA damage st      |
| NM_0100      |             | 0.0348 |       |       | 1.12   | -1.10  | -1.01  | 1.04   | <i>Dapk2</i>                     | death-associated protein kinase 2                                                     | 0006468 // protein phosphorylation // not recorded//0006468 // protein phosphorylati      |
| NM_007376    |             | 0.022  |       |       | -1.15  | -1.07  | -1.01  | -1.13  | <i>Pzp</i>                       | pregnancy zone protein                                                                | 0007566 // embryo implantation // inferred from genetic interaction//0010466 // negat     |
| NM_025912    | //XM_0021   |        |       |       | 1.06   | 1.02   | -1.01  | -1.09  | <i>Fam210b</i>                   | family with sequence similarity 210, member B                                         |                                                                                           |
| NM_001205330 | //NM_00     | 0.042  |       |       | -1.07  | -1.19  | -1.01  | 1.10   | <i>Map4</i>                      | microtubule-associated protein 4                                                      | 0007052 // mitotic spindle organization // inferred from direct assay//0007052 // mitoti  |
| NM_1725      |             | 0.0353 |       |       | 1.07   | -1.05  | -1.01  | -1.02  | <i>Boc</i>                       | biregional cell adhesion molecule-related/down-regulated by oncogenes (Cdon) bindin   | 0007155 // cell adhesion // inferred from electronic annotation//0007224 // smoothne      |
| NM_0335      | #####       |        |       |       | 1.09   | -1.33  | -1.01  | 1.08   | <i>Klf7</i>                      | Kruppel-like factor 7 (ubiquitous)                                                    | 0006351 // transcription, DNA-templated // inferred from electronic annotation//00063     |
| NM_001081650 | //NM_00     | 0.023  |       |       | 1.09   | 1.18   | -1.01  | -1.04  | <i>Rgs3</i>                      | regulator of G-protein signaling 3                                                    | 0007165 // signal transduction // not recorded//0007186 // G-protein coupled receptor     |
| NM_0262      |             | 0.0381 |       |       | 1.27   | -1.10  | -1.01  | 1.06   | <i>Fibin</i>                     | fin bud initiation factor homolog (zebrafish)                                         |                                                                                           |
| NM_0112      |             | 0.0264 |       | 0.021 | 1.14   | 1.02   | -1.01  | 1.05   | <i>Rad9a</i>                     | RAD9 homolog A                                                                        | 0000075 // cell cycle checkpoint // inferred from electronic annotation//0000076 // DN,   |
| NM_0011      |             | 0.0426 |       |       | -1.20  | -1.60  | -1.01  | -1.06  | <i>Fxr1</i>                      | fragile X mental retardation gene 1, autosomal homolog                                | 0007275 // multicellular organismal development // inferred from electronic annotation/   |
| NM_010098    | //XM_0047   |        |       |       | -1.09  | -1.03  | -1.01  | -1.14  | <i>Opn3</i>                      | opsin 3                                                                               | 0007165 // signal transduction // inferred from electronic annotation//0007186 // G-pr    |
| NM_0089      |             | 0.0124 |       |       | 1.04   | -1.24  | -1.01  | -1.03  | <i>Ptger2</i>                    | prostaglandin E receptor 2 (subtype EP2)                                              | 0007165 // signal transduction // inferred from electronic annotation//0007186 // G-pr    |
| NM_001290299 | //NM_14     | 0.037  |       |       | 1.04   | 1.02   | -1.01  | -1.16  | <i>Plppr2</i>                    | phospholipid phosphatase related 2                                                    | 0006470 // protein dephosphorylation // inferred from electronic annotation//0006644      |
| NM_134097    |             | 0.038  |       |       | -1.02  | 1.07   | -1.01  | 1.18   | <i>Topors</i>                    | topoisomerase I binding, arginine/serine-rich                                         | 0006511 // ubiquitin-dependent protein catabolic process // not recorded//0006513 //      |
| NM_0011      |             | 0.0328 |       |       | 1.16   | -1.03  | -1.01  | 1.11   | <i>Isir</i>                      | immunoglobulin superfamily containing leucine-rich repeat                             |                                                                                           |
| NM_0012      |             | 0.0147 |       |       | 1.02   | 1.18   | -1.01  | -1.12  | <i>Arhgap9</i>                   | Rho GTPase activating protein 9                                                       | 0007165 // signal transduction // inferred from electronic annotation//0043547 // posi    |
| NM_001305185 | //NM_00     | 0.009  |       |       | 1.08   | -1.02  | -1.01  | -1.07  | <i>Plekha7</i>                   | pleckstrin homology domain containing, family A member 7                              | 0045218 // zonula adherens maintenance // not recorded//0090136 // epithelial cell-ce     |
| NM_0205      |             | 0.0125 |       |       | -1.02  | 1.07   | -1.01  | -1.01  | <i>Flad1//Lenep</i>              | RFad1, flavin adenine dinucleotide synthetase, homolog (yeast)//lens epithelial prote | 0006747 // FAD biosynthetic process // inferred from electronic annotation//0007275 //,   |
| NM_026639    |             | 0.017  | 0.002 |       | -1.13  | -1.07  | -1.01  | 1.16   | <i>Art4</i>                      | ADP-ribosyltransferase 4                                                              | 0006471 // protein ADP-ribosylation // inferred from electronic annotation                |
| NM_0013      |             | 0.0226 |       |       | -1.15  | -1.00  | -1.01  | -1.03  | <i>Ahcy//Gm4737</i>              | S-adenosylhomocysteine hydrolase//predicted gene 4737                                 | 0002439 // chronic inflammatory response to antigenic stimulus // not recorded//00067     |
| NM_0098      |             | 0.0298 |       |       | 1.12   | 1.70   | -1.01  | -1.04  | <i>Cd19</i>                      | CD19 antigen                                                                          | 0006968 // cellular defense response // not recorded//0007173 // epidermal growth fac     |
| NM_0074      |             | 0.0393 |       |       | 1.09   | -1.45  | -1.01  | 1.06   | <i>Adrb2</i>                     | adrenergic receptor, beta 2                                                           | 0001666 // response to hypoxia // inferred from electronic annotation//0001889 // livei   |
| NM_0206      |             | 0.0151 |       |       | -1.03  | -1.17  | -1.01  | -1.01  | <i>Cramp1</i>                    | Crn, cramped-like (Drosophila)                                                        |                                                                                           |
| NM_0110      |             | 0.0317 |       |       | -1.09  | 1.05   | -1.01  | 1.14   | <i>Pfdn2</i>                     | prefoldin 2                                                                           | 0006457 // protein folding // inferred from direct assay//0051495 // positive regulation  |
| NM_0011      |             | 0.0186 |       |       | -1.04  | 1.25   | -1.01  | 1.01   | <i>Mical1</i>                    | microtubule associated monooxygenase, calponin and LIM domain containing 1            | 0001933 // negative regulation of protein phosphorylation // inferred from mutant phen    |
| NM_1460      |             | 0.0061 |       |       | 1.05   | 1.31   | -1.01  | -1.04  | <i>Nrras</i>                     | negative regulator of reactive oxygen species                                         | 0002376 // immune system process // inferred from electronic annotation//0006801 //       |
| NM_0187      |             | 0.0072 |       |       | 1.06   | -1.09  | -1.01  | 1.10   | <i>Atp6ap1</i>                   | ATPase, H+ transporting, lysosomal accessory protein 1                                | 0006810 // transport // inferred from electronic annotation//0006811 // ion transport/    |
| NM_011693    |             | 0.047  |       |       | -1.19  | -1.23  | -1.01  | 1.11   | <i>Vcam1</i>                     | vascular cell adhesion molecule 1                                                     | 0007155 // cell adhesion // inferred from direct assay//0007155 // cell adhesion // not r |
| NM_0013      |             | 0.0162 |       |       | 1.02   | 1.25   | -1.01  | 1.01   | <i>Cnr2</i>                      | cannabinoid receptor 2 (macrophage)                                                   | 0001975 // response to amphetamine // inferred from electronic annotation//0006954.       |
| NM_007650    | //XM_00652  | 0.015  |       |       | 1.06   | 1.16   | -1.01  | -1.28  | <i>Cd5</i>                       | CD5 antigen                                                                           | 0006898 // receptor-mediated endocytosis // inferred from electronic annotation//0031     |
| NM_001105066 | // 0.05     |        |       |       | -1.02  | 1.04   | -1.01  | -1.04  | <i>Vmn2r34//Vmn2r42//Vmn2r45</i> | vomeronal 2, receptor 34//vomeronal 2, receptor 42//vomeronal 2, receptor             | 0007165 // signal transduction // inferred from electronic annotation//0007186 // G-pr    |
| NM_001004150 | //NM_00     | 0.04   |       |       | -1.18  | -1.13  | -1.01  | 1.27   | <i>A4galt</i>                    | alpha 1,4-galactosyltransferase                                                       | 0001576 // globoside biosynthetic process // inferred from direct assay//0001576 // glo   |
| NM_0011      |             | 0.0011 |       |       | 1.15   | -1.24  | -1.01  | 1.12   | <i>Slc4a5</i>                    | solute carrier family 4, sodium bicarbonate cotransporter, member 5                   | 0002064 // epithelial cell development // inferred from mutant phenotype//0003014 //      |
| NM_0091      |             | 0.0478 |       |       | -1.09  | 1.21   | -1.01  | -1.06  | <i>Selplg</i>                    | selectin, platelet (p-selectin) ligand                                                | 0007155 // cell adhesion // inferred from electronic annotation//0050901 // leukocyte t   |
| NM_008962    | //XR_383147 | 0.006  |       |       | 1.00   | 1.01   | -1.01  | -1.18  | <i>Ptgdr</i>                     | prostaglandin D receptor                                                              | 0006954 // inflammatory response // inferred from mutant phenotype//0007165 // sigr       |
| NM_001033231 | //XM_01     | 0.006  |       |       | 1.09   | 1.02   | -1.01  | -1.11  | <i>Fam195b</i>                   | family with sequence similarity 195, member B                                         | 0010717 // regulation of epithelial to mesenchymal transition // not recorded             |
| NM_009630    | //XM_00651  | 0.024  |       |       | 1.01   | 1.08   | -1.01  | -1.11  | <i>Adora2a</i>                   | adenosine A2a receptor                                                                | 0001963 // synaptic transmission, dopaminergic // inferred from genetic interaction//OC   |
| NM_0011      |             | 0.0082 |       | 0.035 | 1.17   | -1.02  | -1.01  | 1.04   | <i>Tmem80</i>                    | transmembrane protein 80                                                              |                                                                                           |
| NM_001146023 | //NM_02     | 0.018  |       |       | 1.13   | 1.16   | -1.00  | -1.02  | <i>Fam98c</i>                    | family with sequence similarity 98, member C                                          |                                                                                           |
| NM_1393      |             | 0.0136 |       |       | 1.05   | -1.14  | -1.00  | 1.08   | <i>Vasn</i>                      | vasorin                                                                               | 0010719 // negative regulation of epithelial to mesenchymal transition // not recorded//, |
| NM_016854    |             | 0.049  |       |       | -1.18  | -1.08  | -1.00  | -1.09  | <i>Ppp1r3c</i>                   | protein phosphatase 1, regulatory (inhibitor) subunit 3C                              | 0005975 // carbohydrate metabolic process // inferred from electronic annotation//000     |
| NM_001291442 | // 0.024    |        |       |       | 1.05   | 1.00   | -1.00  | 1.14   | <i>Micu1</i>                     | mitochondrial calcium uptake 1                                                        | 0006810 // transport // inferred from electronic annotation//0006811 // ion transport/    |
| NM_0011      |             | 0.0211 |       |       | 1.09   | -1.06  | -1.00  | 1.04   | <i>Enpp2</i>                     | ectonucleotide pyrophosphatase/phosphodiesterase 2                                    | 0001953 // negative regulation of cell-matrix adhesion // not recorded//0006629 // lipic  |
| NM_001047158 | //NM_19     | 0.026  |       |       | 1.04   | 1.01   | -1.00  | -1.06  | <i>Uqcrl2</i>                    | ubiquinol-cytochrome c reductase, complex III subunit X                               | 0006122 // mitochondrial electron transport, ubiquinol to cytochrome c // inferred from   |
| NM_0199      |             | 0.0288 |       |       | 1.06   | -1.14  | -1.00  | -1.13  | <i>Zfp235</i>                    | zinc finger protein 235                                                               | 0006355 // regulation of transcription, DNA-templated // inferred from electronic annot   |
| NM_0214      |             | 0.0191 |       |       | 1.14   | -1.17  | -1.00  | -1.17  | <i>Shank3</i>                    | SH3/ankyrin domain gene 3                                                             | 0000165 // MAPK cascade // inferred from genetic interaction//0001838 // embryonic e      |
| NM_0010      |             | 0.0404 |       |       | -1.94  | -5.56  | -1.00  | -1.16  | <i>Zbtb16</i>                    | zinc finger and BTB domain containing 16                                              | 0000122 // negative regulation of transcription from RNA polymerase II promoter // not r  |
| NM_130892    | //XR_0019   |        |       |       | 1.06   | 1.02   | -1.00  | -1.01  | <i>Rtn4ip1</i>                   | reticulin 4 interacting protein 1                                                     | 0055114 // oxidation-reduction process // inferred from electronic annotation             |
| NM_0010      | #####       | 0.039  |       |       | 1.10   | -1.13  | -1.00  | -1.07  | <i>Zbtb2</i>                     | zinc finger and BTB domain containing 2                                               |                                                                                           |
| NM_0013      |             | 0.0316 |       |       | 1.20   | -1.08  | -1.00  | 1.01   | <i>Spry7</i>                     | SPRY domain containing 7                                                              |                                                                                           |
| NM_023463    |             | 0.008  |       |       | 1.02   | 1.09   | -1.00  | 1.21   | <i>Ly6g6c</i>                    | lymphocyte antigen 6 complex, locus G6C                                               |                                                                                           |
| NM_0213      |             | 0.0272 |       | 0.027 | 1.17   | -1.06  | -1.00  | -1.19  | <i>Slc26a3</i>                   | solute carrier family 26, member 3                                                    | 0006810 // transport // inferred from electronic annotation//0006821 // chloride trans    |
| NM_0091      | #####       |        |       |       | 1.00   | -1.13  | -1.00  | 1.00   | <i>Slc16a2</i>                   | solute carrier family 16 (monocarboxylic acid transporters), member 2                 | 0006810 // transport // inferred from electronic annotation//0009914 // hormone trans     |
| NM_025963    | //XM_01124  | 0.011  |       |       | 1.03   | 1.13   | -1.00  | -1.04  | <i>Rps10//Rps10-ps2</i>          | ribosomal protein S10//ribosomal protein S10, pseudogene 2                            | 0000028 // ribosomal small subunit assembly // ---                                        |
| NM_0010      |             | 0.009  |       |       | 1.10   | -1.12  | -1.00  | 1.06   | <i>Syne1</i>                     | spectrin repeat containing, nuclear envelope 1                                        | 0007030 // Golgi organization // not recorded//0040023 // establishment of nucleus loc    |
| NM_0013      |             | 0.0139 |       |       | 1.06   | -1.23  | -1.00  | 1.03   | <i>Tpk1</i>                      | thiamine pyrophosphokinase                                                            | 0006772 // thiamine metabolic process // inferred from direct assay//0009229 // thiami    |

| RefSeq       | Tri.p  | 24h   | p     | 48h   | p     | 72h   | FD Air | FD 24h | FD 48h | FD 72h | Gene Symbol         | Gene Title                                                                              | Gene Ontology Biological Process                                                            |
|--------------|--------|-------|-------|-------|-------|-------|--------|--------|--------|--------|---------------------|-----------------------------------------------------------------------------------------|---------------------------------------------------------------------------------------------|
| NM_001172112 | 0.024  | 0.035 | -1.12 | -1.01 | -1.00 | 1.08  |        |        |        |        | <i>Dhrs7b</i>       | dehydrogenase/reductase (SDR family) member 7B                                          | 0008152 // metabolic process // inferred from electronic annotation//00055114 // oxidal     |
| NM_0010      | 0.0394 |       | -1.05 | 1.07  | 1.00  | -1.13 |        |        |        |        | <i>Tnfrsf9</i>      | tumor necrosis factor receptor superfamily, member 9                                    | 0006954 // inflammatory response // not recorded//0006955 // immune response // nc          |
| NM_0086      | 0.0471 |       | -1.07 | 1.07  | 1.00  | -1.11 |        |        |        |        | <i>Msh2</i>         | mutS homolog 2 (E. coli)                                                                | 0000710 // meiotic mismatch repair // not recorded//0001701 // in utero embryonic de        |
| NM_0011      | 0.045  |       | 1.00  | 1.26  | 1.00  | 1.03  |        |        |        |        | <i>Sh3bp2</i>       | SH3-domain binding protein 2                                                            |                                                                                             |
| NM_0011      | 0.0035 |       | -1.05 | 1.12  | 1.00  | 1.10  |        |        |        |        | <i>Ptpra</i>        | protein tyrosine phosphatase, receptor type, A                                          | 0006468 // protein phosphorylation // inferred from direct assay//0006470 // protein d      |
| NM_0194      | 0.0209 |       | 1.03  | 1.49  | 1.00  | 1.15  |        |        |        |        | <i>Tmem37</i>       | transmembrane protein 37                                                                | 0006810 // transport // inferred from electronic annotation//0006811 // ion transport /     |
| NM_0011      | 0.0131 | 0.003 | 1.22  | 1.09  | 1.00  | 1.04  |        |        |        |        | <i>Prrc2a</i>       | proline-rich coiled-coil 2A                                                             |                                                                                             |
| NM_0166      | 0.0374 |       | 1.01  | 1.14  | 1.00  | -1.01 |        |        |        |        | <i>Cldn2</i>        | claudin 2                                                                               | 0016338 // calcium-independent cell-cell adhesion via plasma membrane cell-adhesion n       |
| NM_1722      | 0.0203 |       | 1.05  | 1.31  | 1.00  | -1.01 |        |        |        |        | <i>Plcg2</i>        | phospholipase C, gamma 2                                                                | 0002092 // positive regulation of receptor internalization // inferred from mutant phenol   |
| NM_0074      | 0.0357 |       | -1.08 | 1.02  | 1.00  | -1.14 |        |        |        |        | <i>Adra2a</i>       | adrenergic receptor, alpha 2a                                                           | 0001819 // positive regulation of cytokine production // not recorded//0002526 // acut      |
| NM_0117      | 0.045  |       | -1.08 | 1.19  | 1.00  | -1.23 |        |        |        |        | <i>Wnt9b</i>        | wingless-type MMTV integration site family, member 9B                                   | 0001658 // branching involved in ureteric bud morphogenesis // inferred from genetic in     |
| NM_001045525 | 0.044  | 0.044 | 1.00  | 1.04  | 1.00  | 1.17  |        |        |        |        | <i>Cybd1</i>        | cytochrome b5 domain containing 1                                                       |                                                                                             |
| NM_1454      | 0.0134 |       | -1.01 | 1.14  | 1.00  | 1.09  |        |        |        |        | <i>Stk24</i>        | serine/threonine kinase 24                                                              | 0006468 // protein phosphorylation // not recorded//0006915 // apoptotic process // tr      |
| NM_024288    | 0.013  | 0.013 | 1.02  | -1.04 | 1.00  | 1.25  |        |        |        |        | <i>Rmnd5a</i>       | required for meiotic nuclear division 5 homolog A (S. cerevisiae)                       |                                                                                             |
| NM_146168    | 0.021  | 0.021 | -1.14 | -1.23 | 1.00  | 1.08  |        |        |        |        | <i>Vopp1</i>        | vesicular, overexpressed in cancer, prosurvival protein 1                               | 0006351 // transcription, DNA-templated // inferred from electronic annotation//00063       |
| NM_175324    | 0.004  | 0.004 | 1.01  | -1.04 | 1.00  | 1.18  |        |        |        |        | <i>Acad11</i>       | acyl-Coenzyme A dehydrogenase family, member 11                                         | 0008152 // metabolic process // inferred from electronic annotation//0003539 // fatty a     |
| NM_0010      | 0.0478 |       | -1.12 | 1.03  | 1.00  | -1.01 |        |        |        |        | <i>St3gal5</i>      | ST3 beta-galactoside alpha-2,3-sialyltransferase 5                                      | 0001574 // ganglioside biosynthetic process // not recorded//0006486 // protein glyco       |
| NM_1725      | 0.042  |       | -1.02 | 1.14  | 1.00  | 1.03  |        |        |        |        | <i>Rufy1</i>        | RUN and FYVE domain containing 1                                                        | 0006810 // transport // inferred from electronic annotation//0006897 // endocytosis //      |
| NM_025914    | 0.031  | 0.031 | -1.05 | -1.14 | 1.00  | 1.06  |        |        |        |        | <i>Actr6</i>        | ARP6 actin-related protein 6                                                            | 0006338 // chromatin remodeling // inferred from electronic annotation                      |
| NM_0074      | 0.0027 |       | -1.08 | 1.15  | 1.00  | -1.01 |        |        |        |        | <i>Adora2b</i>      | adenosine A2b receptor                                                                  | 0001973 // adenosine receptor signaling pathway // inferred from electronic annotation/     |
| NM_001033908 | 0.045  | 0.03  | 1.14  | 1.00  | 1.00  | -1.08 |        |        |        |        | <i>Med22</i>        | mediator complex subunit 22                                                             | 0006351 // transcription, DNA-templated // inferred from electronic annotation//00063       |
| NM_0010      | 0.0387 |       | -1.04 | 1.30  | 1.00  | 1.20  |        |        |        |        | <i>Eno1</i>         | enolase 1, alpha non-neuron//enolase 1B, retrotransposed                                | 0001701 // in utero embryonic development // inferred from mutant phenotype//00060          |
| NM_0010      | 0.0387 |       | 1.07  | -1.08 | 1.00  | 1.07  |        |        |        |        | <i>Adam28</i>       | a disintegrin and metalloproteinase domain 28                                           | 0006508 // proteolysis // inferred from electronic annotation//0007229 // integrin-med      |
| NM_134133    | 0.015  | 0.015 | -1.17 | -1.23 | 1.00  | -1.03 |        |        |        |        | <i>Smim3</i>        | small integral membrane protein 3                                                       |                                                                                             |
| NM_0012      | 0.0014 |       | -1.02 | 1.31  | 1.00  | -1.14 |        |        |        |        | <i>B4galnt1</i>     | beta-1,4-N-acetyl-galactosaminyl transferase 1                                          | 0001574 // ganglioside biosynthetic process // inferred from genetic interaction//00015     |
| NM_1339      | 0.0025 |       | 1.01  | 1.27  | 1.00  | -1.13 |        |        |        |        | <i>Chpf2</i>        | chondroitin polymerizing factor 2                                                       | 0008152 // metabolic process // inferred from electronic annotation                         |
| NM_027909    | 0.034  | 0.034 | 1.05  | 1.06  | 1.00  | -1.00 |        |        |        |        | <i>C2cd2l</i>       | C2 calcium-dependent domain containing 2-like                                           | 0035774 // positive regulation of insulin secretion involved in cellular response to glucos |
| NM_0198      | 0.0207 |       | -1.02 | -1.24 | 1.00  | -1.08 |        |        |        |        | <i>Gkap1</i>        | G kinase anchoring protein 1                                                            | 0007165 // signal transduction // inferred from direct assay//0007199 // G-protein cou      |
| NM_025989    | 0.03   | 0.03  | -1.17 | -1.11 | 1.00  | 1.06  |        |        |        |        | <i>Gp2</i>          | glycoprotein 2 (zymogen granule membrane)                                               | 0002412 // antigen transcytosis by M cells in mucosal-associated lymphoid tissue // infer   |
| NM_008598    | 0.023  | 0.023 | 1.05  | 1.00  | 1.00  | -1.18 |        |        |        |        | <i>Mgmt</i>         | O-6-methylguanine-DNA methyltransferase                                                 | 0006281 // DNA repair // inferred from mutant phenotype//0006307 // DNA dealkylat           |
| NM_031406    | 0.017  | 0.017 | 1.12  | 1.06  | 1.00  | -1.03 |        |        |        |        | <i>Slc12a9</i>      | solute carrier family 12 (potassium/chloride transporters), member 9                    | 0006810 // transport // inferred from electronic annotation//0006811 // ion transport /     |
| NM_0260      | 0.0079 |       | 1.04  | 1.18  | 1.00  | 1.11  |        |        |        |        | <i>Ikbkap</i>       | inhibitor of kappa light polypeptide enhancer in B cells, kinase complex-associated pro | 0006351 // transcription, DNA-templated // inferred from electronic annotation//00063       |
| NM_0075      | 0.0087 |       | 1.02  | 1.19  | 1.00  | -1.15 |        |        |        |        | <i>Phb2</i>         | prohibitin 2                                                                            | 0000060 // protein import into nucleus, translocation // not recorded//0006351 // tran      |
| NM_0532      | 0.0446 |       | -1.10 | 1.11  | 1.00  | -1.06 |        |        |        |        | <i>Myo1f</i>        | myosin IF                                                                               | 0002446 // neutrophil mediated immunity // inferred from mutant phenotype//000716:          |
| NM_0012      | 0.0207 | 0.048 | 1.07  | -1.29 | 1.00  | 1.33  |        |        |        |        | <i>Cipc</i>         | CLOCK interacting protein, circadian                                                    | 0006351 // transcription, DNA-templated // inferred from electronic annotation//00063       |
| NM_0090      | 0.0324 |       | -1.07 | 1.06  | 1.00  | 1.04  |        |        |        |        | <i>Rasgrf2</i>      | RAS protein-specific guanine nucleotide-releasing factor 2                              | 0007264 // small GTPase mediated signal transduction // inferred from electronic annota     |
| NM_145416    | 0.016  | 0.016 | 1.07  | -1.04 | 1.00  | -1.09 |        |        |        |        | <i>Kri1</i>         | KRI1 homolog (S. cerevisiae)                                                            |                                                                                             |
| NM_0010      | 0.0223 |       | 1.07  | -1.00 | 1.00  | 1.02  |        |        |        |        | <i>Atxn7l3b</i>     | ataxin 7-like 3B                                                                        |                                                                                             |
| NM_001185083 | 0.022  | 0.022 | 1.07  | 1.02  | 1.00  | -1.09 |        |        |        |        | <i>Ins2</i>         | insulin II                                                                              | 0000122 // negative regulation of transcription from RNA polymerase II promoter // infer    |
| NM_0013      | 0.0451 | 0.002 | 1.09  | -1.02 | 1.00  | 1.02  |        |        |        |        | <i>Tmub2</i>        | transmembrane and ubiquitin-like domain containing 2                                    |                                                                                             |
| NM_001081339 | 0.034  | 0.034 | -1.11 | -1.15 | 1.00  | -1.19 |        |        |        |        | <i>Xirp1</i>        | xin actin-binding repeat containing 1                                                   | 0003007 // heart morphogenesis // not recorded//0007219 // Notch signaling pathway          |
| NM_0011      | 0.003  |       | 1.11  | -1.33 | 1.00  | -1.04 |        |        |        |        | <i>Gjc1</i>         | gap junction protein, gamma 1                                                           | 0001570 // vasculogenesis // inferred from mutant phenotype//0007154 // cell commu          |
| NM_0011      | 0.0038 |       | -1.05 | 1.18  | 1.01  | -1.14 |        |        |        |        | <i>Psmg4</i>        | proteasome (prosome, macropain) assembly chaperone 4                                    | 0043248 // proteasome assembly // inferred from electronic annotation                       |
| NM_001290011 | 0.047  | 0.047 | 1.06  | -1.04 | 1.01  | -1.10 |        |        |        |        | <i>Pemt</i>         | phosphatidylethanolamine N-methyltransferase                                            | 0006629 // lipid metabolic process // inferred from electronic annotation//0006644 // p     |
| NM_1988      | 0.0321 |       | 1.12  | -1.04 | 1.01  | -1.07 |        |        |        |        | <i>Scx</i>          | scleraxis                                                                               | 0001707 // mesoderm formation // inferred from mutant phenotype//0001894 // tissue          |
| NM_001122958 | 0.014  | 0.014 | -1.12 | -1.04 | 1.01  | -1.01 |        |        |        |        | <i>Rad54l</i>       | RAD54 like (S. cerevisiae)                                                              | 0000724 // double-strand break repair via homologous recombination // inferred from g       |
| NM_0012      | 0.0226 | 0.04  | -1.07 | 1.03  | 1.01  | -1.08 |        |        |        |        | <i>D16Erd472e</i>   | DNA segment, Chr 16, ERATO Doi 472, expressed                                           |                                                                                             |
| NM_0013      | 0.0417 |       | -1.01 | 1.11  | 1.01  | 1.10  |        |        |        |        | <i>Psmf1</i>        | proteasome (prosome, macropain) inhibitor subunit 1                                     | 0006511 // ubiquitin-dependent protein catabolic process // not recorded//1901799 //        |
| NM_177876    | 0.047  | 0.047 | 1.03  | 1.12  | 1.01  | -1.19 |        |        |        |        | <i>Vps37b</i>       | vacuolar protein sorting 37B (yeast)                                                    | 0006810 // transport // inferred from electronic annotation//0015031 // protein transp      |
| NM_0013      | 0.0373 |       | 1.01  | 1.32  | 1.01  | -1.13 |        |        |        |        | <i>Unc119</i>       | unc-119 homolog (C. elegans)                                                            | 0006810 // transport // inferred from electronic annotation//0006897 // endocytosis //      |
| NM_001164082 | 0.033  | 0.033 | -1.01 | 1.06  | 1.01  | -1.11 |        |        |        |        | <i>Polr3d</i>       | polymerase (RNA) III (DNA directed) polypeptide D                                       | 0002376 // immune system process // inferred from electronic annotation//0006351 //         |
| NM_0011      | 0.0089 |       | -1.16 | 1.11  | 1.01  | -1.11 |        |        |        |        | <i>Lmo4</i>         | LIM domain only 4                                                                       | 0001843 // neural tube closure // inferred from mutant phenotype//0003281 // ventric        |
| NM_1454      | 0.0181 |       | -1.01 | 1.09  | 1.01  | -1.02 |        |        |        |        | <i>Heatr6</i>       | HEAT repeat containing 6                                                                |                                                                                             |
| NM_0011      | 0.0089 |       | 1.02  | -1.24 | 1.01  | 1.10  |        |        |        |        | <i>Tsc22d1</i>      | TSC22 domain family, member 1                                                           | 0006351 // transcription, DNA-templated // inferred from electronic annotation//00063       |
| NM_009076    | 0.007  | 0.007 | 1.02  | 1.22  | 1.01  | -1.15 |        |        |        |        | <i>LOC102635048</i> | 60S ribosomal protein L12 pseudogene//ribosomal protein L12//ribosomal protein L        | 0000027 // ribosomal large subunit assembly // ---//0006412 // translation // inferred fr   |
| NM_0195      | 0.0295 |       | 1.01  | -1.27 | 1.01  | 1.00  |        |        |        |        | <i>Pfce1</i>        | phospholipase C, epsilon 1                                                              | 0000187 // activation of MAPK activity // not recorded//0006629 // lipid metabolic pro      |
| NM_0011      | 0.0441 |       | 1.13  | -1.02 | 1.01  | 1.05  |        |        |        |        | <i>Sprtn</i>        | SprT-like N-terminal domain                                                             | 0006281 // DNA repair // inferred from electronic annotation//0006974 // cellular resp      |
| NM_0010      | 0.0376 |       | 1.01  | -1.12 | 1.01  | 1.09  |        |        |        |        | <i>Myrf</i>         | myelin regulatory factor                                                                | 0006351 // transcription, DNA-templated // inferred from electronic annotation//00063       |
| NM_025857    | 0.006  | 0.006 | -1.02 | 1.02  | 1.01  | 1.11  |        |        |        |        | <i>Aagab</i>        | alpha- and gamma-adaptin binding protein                                                | 0006810 // transport // inferred from electronic annotation//0015031 // protein transp      |
| NM_0540      | 0.0438 | 0.047 | 1.14  | -1.03 | 1.01  | 1.13  |        |        |        |        | <i>Pip4k2c</i>      | phosphatidylinositol-5-phosphate 4-kinase, type II, gamma                               | 0010506 // regulation of autophagy // not recorded//0016310 // phosphorylation // inf       |
| NM_025465    | 0.036  | 0.036 | -1.12 | 1.01  | 1.01  | -1.02 |        |        |        |        | <i>Tma16</i>        | translation machinery associated 16 homolog (S. cerevisiae)                             |                                                                                             |
| NM_0111      | 0.0356 |       | -1.01 | 1.08  | 1.01  | 1.17  |        |        |        |        | <i>Pa2g4</i>        | proliferation-associated 2G4                                                            | 0006351 // transcription, DNA-templated // inferred from electronic annotation//00063       |
| NM_030168    | 0.016  | 0.016 | -1.06 | -1.01 | 1.01  | 1.01  |        |        |        |        | <i>Rictor</i>       | RPTOR independent companion of MTOR, complex 2                                          | 0001932 // regulation of protein phosphorylation // inferred from mutant phenotype//C       |
| NM_0306      | 0.0329 |       | 1.07  | -1.26 | 1.01  | 1.02  |        |        |        |        | <i>Kank3</i>        | KN motif and ankyrin repeat domains 3                                                   | 0051497 // negative regulation of stress fiber assembly // not recorded                     |



| RefSeq       | Tri         | p 24h | p 48h | p 72h | FD Air | FD 24h | FD 48h | FD 72h | Gene Symbol                                  | Gene Title                                                                       | Gene Ontology Biological Process                                                            |
|--------------|-------------|-------|-------|-------|--------|--------|--------|--------|----------------------------------------------|----------------------------------------------------------------------------------|---------------------------------------------------------------------------------------------|
| NM_0092      | 0.003       | 0.046 | 1.13  | -1.05 | 1.02   | 1.10   | 1.10   | 1.10   | <i>Sptbn1</i>                                | spectrin beta, non-erythrocytic 1                                                | 0000281 // mitotic cytokinesis // not recorded//0007009 // plasma membrane organiza         |
| NM_0012      | 0.0055      |       | 1.07  | -1.04 | 1.02   | 1.05   | 1.05   | 1.05   | <i>Foxj3</i>                                 | forkhead box J3                                                                  | 0006351 // transcription, DNA-templated // inferred from electronic annotation//000063      |
| NM_001038608 | ///NM_00    | 0.03  | 1.04  | 1.08  | 1.02   | -1.04  | -1.04  | -1.04  | <i>Txn14a</i>                                | thioredoxin-like 4A                                                              | 0000245 // spliceosomal complex assembly // not recorded//0000398 // mRNA splicing,         |
| NM_0099      | 0.0137      |       | -1.30 | 1.06  | 1.02   | 1.03   | 1.03   | 1.03   | <i>Ccr1</i>                                  | chemokine (C-C motif) receptor 1                                                 | 0006816 // calcium ion transport // not recorded//0006874 // cellular calcium ion home      |
| NM_0012      | 0.0019      |       | 1.11  | 1.73  | 1.02   | -1.01  | -1.01  | -1.01  | <i>Fcer2a</i>                                | Fc receptor, IgE, low affinity II, alpha polypeptide                             | 0002925 // positive regulation of humoral immune response mediated by circulating immr      |
| NM_1341      | 0.013       |       | 1.09  | 1.35  | 1.02   | 1.25   | 1.25   | 1.25   | <i>Gpsm3</i>                                 | G-protein signalling modulator 3 (AGS3-like, C. elegans)                         | 0002690 // positive regulation of leukocyte chemotaxis // inferred from mutant phenoty      |
| NM_001290817 | ///         | 0.047 | -1.19 | -1.15 | 1.02   | 1.00   | 1.00   | 1.00   | <i>Sparc</i>                                 | secreted acidic cysteine rich glycoprotein                                       | 0001503 // ossification // inferred from electronic annotation//0001937 // negative reg     |
| NM_0010      | 0.0148      |       | 1.03  | -1.12 | 1.02   | 1.18   | 1.18   | 1.18   | <i>Hnrnpul2</i>                              | heterogeneous nuclear ribonucleoprotein U-like 2                                 |                                                                                             |
| NM_023732    | ///XM       | 0.012 | -1.04 | 1.13  | 1.02   | -1.01  | -1.01  | -1.01  | <i>Abcb6</i>                                 | ATP-binding cassette, sub-family B (MDR/TAP), member 6                           | 0006779 // porphyrin-containing compound biosynthetic process // not recorded//0006         |
| NM_0298      | 0.0161      |       | -1.07 | -1.28 | 1.02   | 1.17   | 1.17   | 1.17   | <i>Chmp5</i>                                 | charged multivesicular body protein 5                                            | 0000920 // cell separation after cytokinesis // not recorded//0001919 // regulation of re   |
| NM_0010      | 0.0223      | 0.017 | 1.01  | -1.13 | 1.02   | -1.20  | -1.20  | -1.20  | <i>Glyctk</i>                                | glycerate kinase                                                                 | 0006468 // protein phosphorylation // not recorded//0016310 // phosphorylation // inf       |
| NM_172710    | ///XM_01124 | 0.017 | -1.14 | 1.07  | 1.02   | 1.07   | 1.07   | 1.07   | <i>Sel1l3</i>                                | sel-1 suppressor of lin-12-like 3 (C. elegans)                                   |                                                                                             |
| NM_0013      | 0.0039      |       | 1.14  | 2.54  | 1.02   | -1.02  | -1.02  | -1.02  | <i>Cd79b</i>                                 | CD79B antigen                                                                    | 0002250 // adaptive immune response // inferred from electronic annotation//0002376         |
| NM_001304773 | ///NM_00    | 0.03  | -1.04 | -1.13 | 1.02   | 1.07   | 1.07   | 1.07   | <i>Pex26</i>                                 | peroxisomal biogenesis factor 26                                                 | 0006810 // transport // inferred from electronic annotation//0015031 // protein transp      |
| NM_011295    | ///XR       | 0.016 | 1.02  | 1.15  | 1.02   | -1.00  | -1.00  | -1.00  | <i>Rps12</i> ///Rps12-ps10//Rps12-ps11//Rps1 | ribosomal protein S12//ribosomal protein S12, pseudogene 10//ribosomal protein S | 0006412 // translation // inferred from electronic annotation                               |
| NM_0287      | #####       |       | 1.05  | -1.05 | 1.02   | -1.03  | -1.03  | -1.03  | <i>Gm10651</i> ///Josl61                     | predicted pseudogene 10651//Josephin domain containing 1                         | 0006508 // proteolysis // inferred from electronic annotation                               |
| NM_0261      | 0.0329      |       | 1.12  | -1.22 | 1.02   | -1.22  | -1.22  | -1.22  | <i>Dedd2</i>                                 | death effector domain-containing DNA binding protein 2                           | 0006351 // transcription, DNA-templated // inferred from electronic annotation//00063       |
| NM_0263      | 0.0368      |       | -1.15 | 1.25  | 1.02   | -1.18  | -1.18  | -1.18  | <i>Cdk2ap2</i>                               | CDK2-associated protein 2                                                        |                                                                                             |
| NM_0010      | 0.011       |       | 1.11  | -1.01 | 1.02   | 1.17   | 1.17   | 1.17   | <i>Arid1a</i>                                | AT rich interactive domain 1A (SWI-like)                                         | 0000122 // negative regulation of transcription from RNA polymerase II promoter // infer    |
| NM_0294      | 0.0458      |       | 1.05  | 1.26  | 1.02   | -1.08  | -1.08  | -1.08  | <i>Ms4a4c</i>                                | membrane-spanning 4-domains, subfamily A, member 4C                              |                                                                                             |
| NM_0200      | 0.0109      |       | 1.04  | 1.29  | 1.02   | 1.10   | 1.10   | 1.10   | <i>Tacstd2</i>                               | tumor-associated calcium signal transducer 2                                     | 0010633 // negative regulation of epithelial cell migration // inferred from direct assay// |
| NM_001286005 | ///NM_02    | 0.019 | 1.03  | -1.03 | 1.02   | -1.15  | -1.15  | -1.15  | <i>Abcg8</i>                                 | ATP-binding cassette, sub-family G (WHITE), member 8                             | 0006810 // transport // inferred from electronic annotation//0007584 // response to nu      |
| NM_0010      | 0.0014      |       | 1.02  | 1.28  | 1.02   | -1.18  | -1.18  | -1.18  | <i>Akna</i>                                  | AT-hook transcription factor                                                     | 0006351 // transcription, DNA-templated // inferred from electronic annotation//00063       |
| NM_0011      | 0.0099      |       | 1.14  | -1.03 | 1.02   | 1.08   | 1.08   | 1.08   | <i>Cntn1</i>                                 | contactin 1                                                                      | 0007155 // cell adhesion // inferred from electronic annotation//0007219 // Notch sign:     |
| NM_0194      | 0.0296      |       | 1.15  | 1.01  | 1.02   | -1.03  | -1.03  | -1.03  | <i>Hes6</i>                                  | hairy and enhancer of split 6                                                    | 0000122 // negative regulation of transcription from RNA polymerase II promoter // infer    |
| NM_024465    | ///XM_00650 | 0.043 | 1.12  | 1.16  | 1.02   | 1.01   | 1.01   | 1.01   | <i>Abhd12</i>                                | abhydrolase domain containing 12                                                 | 0006660 // phosphatidylserine catabolic process // inferred from mutant phenotype//00       |
| NM_0011      | 0.0028      |       | 1.07  | -1.06 | 1.02   | 1.04   | 1.04   | 1.04   | <i>Senp3</i>                                 | SUMO/sentrin specific peptidase 3                                                | 0006508 // proteolysis // inferred from electronic annotation//0016926 // protein desu      |
| NM_001289848 | ///NM_00    | 0.034 | -1.01 | 1.11  | 1.02   | 1.15   | 1.15   | 1.15   | <i>Cox6b2</i>                                | cytochrome c oxidase subunit VIb polypeptide 2                                   | 1902600 // hydrogen ion transmembrane transport // inferred from electronic annotat         |
| NM_0010      | 0.0088      |       | -1.04 | 1.23  | 1.02   | -1.05  | -1.05  | -1.05  | <i>Ptpn6</i>                                 | protein tyrosine phosphatase, non-receptor type 6                                | 0002244 // hematopoietic progenitor cell differentiation // inferred from mutant phenot     |
| NM_0074      | #####       |       | 1.01  | 1.24  | 1.02   | 1.14   | 1.14   | 1.14   | <i>Rplp0</i>                                 | ribosomal protein, large, P0                                                     | 0042254 // ribosome biogenesis // inferred from electronic annotation//0071353 // cell      |
| NM_018779    | ///XM_00650 | 0.02  | 1.03  | -1.10 | 1.02   | -1.20  | -1.20  | -1.20  | <i>Pde3a</i>                                 | phosphodiesterase 3A, cGMP inhibited                                             | 0001556 // oocyte maturation // inferred from direct assay//0006198 // cAMP catabolic       |
| NM_0011      | 0.0123      |       | -1.04 | 1.11  | 1.02   | -1.07  | -1.07  | -1.07  | <i>LOC102641289</i> ///Tbc1d14               | TBC1 domain family member 14//TBC1 domain family, member 14                      | 0010507 // negative regulation of autophagy // not recorded//0043547 // positive regul      |
| NM_0119      | 0.0495      |       | -1.02 | 1.20  | 1.02   | 1.11   | 1.11   | 1.11   | <i>Nubp2</i>                                 | nucleotide binding protein 2                                                     | 0016226 // iron-sulfur cluster assembly // inferred from electronic annotation//003003      |
| NM_0010      | 0.0313      |       | 1.06  | -1.15 | 1.02   | 1.06   | 1.06   | 1.06   | <i>Phactr1</i>                               | phosphatase and actin regulator 1                                                | 0031032 // actomyosin structure organization // inferred from mutant phenotype//003:        |
| NM_0012      | 0.0428      |       | 1.15  | -1.04 | 1.02   | 1.08   | 1.08   | 1.08   | <i>Wdr13</i>                                 | WD repeat domain 13                                                              |                                                                                             |
| NM_0256      | 0.0273      | 0.008 | 1.08  | 1.03  | 1.03   | 1.16   | 1.16   | 1.16   | <i>Rnf181</i>                                | ring finger protein 181                                                          | 0000209 // protein polyubiquitination // --//0016567 // protein ubiquitination // infer     |
| NM_177638    | ///XM_00652 | 0.027 | 1.11  | 1.08  | 1.03   | -1.09  | -1.09  | -1.09  | <i>Crb3</i>                                  | crumbs family member 3                                                           | 0045198 // establishment of epithelial cell apical/basal polarity // not recorded//00452    |
| NM_1447      | 0.0074      |       | 1.11  | 1.39  | 1.03   | -1.13  | -1.13  | -1.13  | <i>Metrn1</i>                                | meteorin, glial cell differentiation regulator-like                              | 0009409 // response to cold // inferred from direct assay//0014850 // response to musc      |
| NM_033324    | ///XM       | 0.032 | -1.06 | 1.10  | 1.03   | -1.05  | -1.05  | -1.05  | <i>Dgcr8</i>                                 | DiGeorge syndrome critical region gene 8                                         | 0031053 // primary miRNA processing // not recorded//0072091 // regulation of stem c        |
| NM_012017    | ///XM       | 0.003 | 1.20  | 1.11  | 1.03   | 1.11   | 1.11   | 1.11   | <i>Zfp346</i>                                | zinc finger protein 346                                                          | 0043065 // positive regulation of apoptotic process // inferred from mutant phenotype//     |
| NM_0242      | 0.0389      |       | 1.00  | 1.10  | 1.03   | 1.04   | 1.04   | 1.04   | <i>Ipo4</i> ///Tms9sf1                       | importin 4//transmembrane 9 superfamily member 1                                 | 0000059 // protein import into nucleus, docking // not recorded//0000060 // protein im      |
| NM_001277265 | ///NM_00    | 0.004 | 1.13  | 1.03  | 1.03   | -1.18  | -1.18  | -1.18  | <i>Tbxa2r</i>                                | thromboxane A2 receptor                                                          | 0006954 // inflammatory response // inferred from mutant phenotype//0007165 // sigr         |
| NM_0011      | 0.0291      |       | -1.03 | -1.17 | 1.03   | 1.03   | 1.03   | 1.03   | <i>Bub1</i>                                  | budding uninhibited by benzimidazoles 1 homolog (S. cerevisiae)                  | 0006468 // protein phosphorylation // inferred from electronic annotation//0006915 //       |
| NM_0091      | 0.0346      | 0.036 | 1.06  | 1.00  | 1.03   | 1.21   | 1.21   | 1.21   | <i>Sepw1</i>                                 | selenoprotein W, muscle 1                                                        | 0045454 // cell redox homeostasis // inferred from electronic annotation//0055114 // o      |
| NM_0087      | 0.0074      |       | 1.02  | -1.19 | 1.03   | 1.00   | 1.00   | 1.00   | <i>Notch1</i>                                | notch 1                                                                          | 0000122 // negative regulation of transcription from RNA polymerase II promoter // infer    |
| NM_0137      | 0.0122      |       | -1.18 | 1.65  | 1.03   | -1.23  | -1.23  | -1.23  | <i>Cd52</i>                                  | CD52 antigen                                                                     |                                                                                             |
| NM_0011      | 0.011       |       | 1.14  | 1.38  | 1.03   | 1.02   | 1.02   | 1.02   | <i>Myc</i>                                   | myelocytomatosis oncogene                                                        | 0000122 // negative regulation of transcription from RNA polymerase II promoter // infer    |
| NM_145134    |             | 0.007 | 1.03  | 1.03  | 1.03   | -1.17  | -1.17  | -1.17  | <i>Spsb4</i>                                 | splA/ryanodine receptor domain and SOCS box containing 4                         | 0016567 // protein ubiquitination // inferred from electronic annotation//0035556 // in     |
| NM_0113      | 0.0273      |       | 1.08  | -1.08 | 1.03   | 1.16   | 1.16   | 1.16   | <i>Scnn1g</i>                                | sodium channel, nonvoltage-gated 1 gamma                                         | 0006810 // transport // inferred from electronic annotation//0006811 // ion transport /     |
| NM_0010      | 0.0046      |       | -1.08 | 1.58  | 1.03   | 1.00   | 1.00   | 1.00   | <i>Evi2a</i>                                 | ecotropic viral integration site 2a                                              |                                                                                             |
| NM_0260      | #####       |       | -1.06 | 1.12  | 1.03   | -1.01  | -1.01  | -1.01  | <i>Rrp15</i>                                 | ribosomal RNA processing 15 homolog (S. cerevisiae)                              |                                                                                             |
| NM_001128609 | ///         | 0.044 | -1.01 | 1.01  | 1.03   | 1.04   | 1.04   | 1.04   | <i>Dedd</i>                                  | death effector domain-containing                                                 | 0006351 // transcription, DNA-templated // inferred from electronic annotation//00063       |
| NM_0013      | 0.0304      |       | -1.10 | 1.10  | 1.03   | 1.23   | 1.23   | 1.23   | <i>Rab5c</i>                                 | RAB5C, member RAS oncogene family                                                | 0006810 // transport // inferred from electronic annotation//0006886 // intracellular pr    |
| NM_0010      | #####       |       | 1.12  | -1.03 | 1.03   | 1.34   | 1.34   | 1.34   | <i>Rere</i>                                  | arginine glutamic acid dipeptide (RE) repeats                                    | 0000122 // negative regulation of transcription from RNA polymerase II promoter // infer    |
| NM_009201    | ///XM       | 0.048 | 1.24  | 1.24  | 1.03   | 1.09   | 1.09   | 1.09   | <i>Slc1a5</i>                                | solute carrier family 1 (neutral amino acid transporter), member 5               | 0003333 // amino acid transmembrane transport // not recorded//0006810 // transpor          |
| NM_1769      | 0.0166      |       | -1.01 | -1.08 | 1.03   | 1.00   | 1.00   | 1.00   | <i>Galm</i>                                  | galactose mutarotase                                                             | 0005975 // carbohydrate metabolic process // not recorded//0006006 // glucose metab         |
| NM_0012      | 0.0046      |       | -1.03 | 1.23  | 1.03   | 1.01   | 1.01   | 1.01   | <i>Sulf2</i>                                 | sulfatase 2                                                                      | 0001822 // kidney development // inferred from genetic interaction//0002063 // chond        |
| NM_0011      | 0.0456      |       | -1.07 | -1.34 | 1.03   | 1.01   | 1.01   | 1.01   | <i>Atp7a</i>                                 | ATPase, Cu++ transporting, alpha polypeptide                                     | 0001568 // blood vessel development // inferred from mutant phenotype//0001701 // i         |
| NM_027898    | ///XM_00654 | 0.024 | 1.03  | 1.00  | 1.03   | -1.28  | -1.28  | -1.28  | <i>Gramd1a</i>                               | GRAM domain containing 1A                                                        |                                                                                             |
| NM_054094    | ///XM       | 0.046 | -1.17 | -1.08 | 1.03   | 1.10   | 1.10   | 1.10   | <i>Acsm1</i>                                 | acyl-CoA synthetase medium-chain family member 1                                 | 0006629 // lipid metabolic process // inferred from electronic annotation//0006631 // f.    |
| NM_0010      | 0.0261      |       | 1.11  | -1.10 | 1.03   | -1.06  | -1.06  | -1.06  | <i>Arl4a</i>                                 | ADP-ribosylation factor-like 4A                                                  | 0007264 // small GTPase mediated signal transduction // inferred from electronic annota     |
| NM_011657    | ///XM_00650 | 0.009 | -1.04 | -1.02 | 1.03   | 1.08   | 1.08   | 1.08   | <i>Tulp3</i>                                 | tubby-like protein 3                                                             | 0001841 // neural tube formation // inferred from mutant phenotype//0001843 // neur         |
| NM_0101      | 0.0018      |       | 1.08  | -1.20 | 1.03   | -1.11  | -1.11  | -1.11  | <i>Efnb1</i>                                 | ephrin B1                                                                        | 0001755 // neural crest cell migration // inferred from mutant phenotype//0007275 // r      |
| NM_008172    | ///XM_00654 | 0.007 | 1.04  | 1.04  | 1.03   | -1.24  | -1.24  | -1.24  | <i>Grin2d</i>                                | glutamate receptor, ionotropic, NMDA2D (epsilon 4)                               | 0001964 // startle response // inferred from mutant phenotype//0006810 // transport /       |



| RefSeq       | Tri          | p 24h  | p 48h | p 72h | FD Air | FD 24h | FD 48h | FD 72h           | Gene Symbol                                            | Gene Title                                                                             | Gene Ontology Biological Process                                                               |
|--------------|--------------|--------|-------|-------|--------|--------|--------|------------------|--------------------------------------------------------|----------------------------------------------------------------------------------------|------------------------------------------------------------------------------------------------|
| NM_0012      |              | 0.016  |       |       | -1.03  | 1.11   | 1.03   | 1.05             | <i>Pex5</i>                                            | peroxisomal biogenesis factor 5                                                        | 0000038 // very long-chain fatty acid metabolic process // inferred from mutant phenoty        |
| NM_0083      |              | 0.0456 |       |       | -1.01  | 1.11   | 1.03   | -1.33            | <i>Il3ra</i>                                           | interleukin 3 receptor, alpha chain                                                    | 00191221 // cytokine-mediated signaling pathway // inferred from electronic annotation         |
| NM_198604    | ///XM_006505 |        | 0.017 |       | 1.03   | -1.01  | 1.03   | -1.12            | <i>Plekhhg6</i>                                        | pleckstrin homology domain containing, family G (with RhoGef domain) member 6          | 0035023 // regulation of Rho protein signal transduction // inferred from electronic anno      |
| NM_0333      |              | 0.0343 |       |       | 1.00   | 1.39   | 1.03   | -1.01            | <i>Dock2</i>                                           | dedicator of cyto-kinesis 2                                                            | 0001766 // membrane raft polarization // inferred from mutant phenotype//0001768 //            |
| NM_0010      |              | 0.0341 |       |       | 1.04   | -1.10  | 1.03   | 1.16             | <i>Tulp4</i>                                           | tubby like protein 4                                                                   | 0016567 // protein ubiquitination // inferred from electronic annotation//0035556 // i         |
| NM_0265      |              | 0.0358 |       |       | 1.08   | -1.06  | 1.03   | -1.15            | <i>Cog8///Pdf</i>                                      | component of oligomeric golgi complex 8//peptide deformylase (mitochondrial)           | 0006412 // translation // inferred from electronic annotation//0006810 // transport // in      |
| NM_0011      |              | 0.0084 |       | 0.042 | -1.03  | 1.15   | 1.03   | 1.15             | <i>Lonp2</i>                                           | lon peptidase 2, peroxisomal                                                           | 0006508 // proteolysis // inferred from electronic annotation//0006515 // misfolded or         |
| NM_029619    | ///XM_006495 |        | 0.013 |       | 1.01   | 1.06   | 1.03   | -1.21            | <i>Msrb2</i>                                           | methionine sulfoxide reductase B2                                                      | 0006979 // response to oxidative stress // inferred from electronic annotation//003004:        |
| NM_0086      |              | 0.0307 |       |       | 1.02   | 1.23   | 1.03   | 1.07             | <i>Mmp14</i>                                           | matrix metallopeptidase 14 (membrane-inserted)                                         | 0001503 // ossification // inferred from genetic interaction//0001525 // angiogenesis //       |
| NM_001190449 | ///NM_01     |        | 0.007 |       | 1.10   | 1.12   | 1.03   | -1.03            | <i>Ddah2</i>                                           | dimethylarginine dimethylaminohydrolase 2                                              | 0000052 // citrulline metabolic process // not recorded//0006525 // arginine metabolic         |
| NM_001163754 | ///          | 0.015  | 0.045 |       | -1.08  | -1.04  | 1.03   | 1.08             | <i>Rab3gap2</i>                                        | RAB3 GTPase activating protein subunit 2                                               | 0043087 // regulation of GTPase activity // not recorded//0043547 // positive regulator        |
| NM_0098      |              | 0.0018 |       |       | -1.02  | -1.10  | 1.03   | 1.09             | <i>Ctnna1</i>                                          | catenin (cadherin associated protein), alpha 1                                         | 0001541 // ovarian follicle development // inferred from electronic annotation//000701         |
| NM_0197      |              | 0.0031 |       |       | -1.00  | 1.08   | 1.03   | -1.07            | <i>Ikbke</i>                                           | inhibitor of kappaB kinase epsilon                                                     | 0006468 // protein phosphorylation // not recorded//0006974 // cellular response to DI         |
| NM_0805      |              | 0.0197 |       |       | 1.06   | -1.25  | 1.03   | 1.05             | <i>Ssfa2</i>                                           | sperm specific antigen 2                                                               |                                                                                                |
| NM_0012      |              | 0.0172 |       |       | 1.11   | -1.06  | 1.03   | 1.14             | <i>Gtf2h1</i>                                          | general transcription factor II H, polypeptide 1                                       | 0006281 // DNA repair // inferred from electronic annotation//0006289 // nucleotide-e-         |
| NM_0011      |              | 0.0462 |       |       | -1.06  | 1.07   | 1.03   | 1.10             | <i>Ptprj///Gm38718///Gm39869</i>                       | protein tyrosine phosphatase, receptor type, 3//predicted gene, 38718//predicted ge    | 0001570 // vasculogenesis // inferred from mutant phenotype//0001954 // positive regu          |
| NM_0011      |              | 0.0349 |       |       | -1.01  | 1.39   | 1.03   | 1.05             | <i>Evl</i>                                             | Ena-vasodilator stimulated phosphoprotein                                              | 0007411 // axon guidance // non-traceable author statement//0008154 // intrac polym            |
| NM_0011      |              | 0.027  |       |       | -1.08  | 1.07   | 1.03   | 1.09             | <i>Snx10</i>                                           | sorting nexin 10                                                                       | 0006810 // transport // inferred from electronic annotation//0006897 // endocytosis //         |
| NM_0257      |              | 0.0094 |       |       | -1.13  | 1.12   | 1.03   | 1.13             | <i>Pgmp1</i>                                           | phosphoglucomutase 1                                                                   | 0005975 // carbohydrate metabolic process // inferred from electronic annotation//000          |
| NM_011890    |              |        | 0.023 |       | -1.00  | -1.05  | 1.03   | 1.18             | <i>Sgcb</i>                                            | sarcoglycan, beta (dystrophin-associated glycoprotein)                                 | 0007517 // muscle organ development // inferred from electronic annotation//0048747            |
| NM_0169      |              | 0.03   |       | 0.03  | -1.14  | 1.30   | 1.03   | 1.36             | <i>Gm8096///Phgdh</i>                                  | 3-phosphoglycerate dehydrogenase pseudogene//3-phosphoglycerate dehydrogenas           | 0006541 // glutamine metabolic process // inferred from mutant phenotype//0006544 ,            |
| NM_1534      |              | 0.0138 |       |       | 1.21   | -1.06  | 1.03   | 1.26             | <i>Dusp7</i>                                           | dual specificity phosphatase 7                                                         | 0000188 // inactivation of MAPK activity // not recorded//0006470 // protein dephosp           |
| NM_0011      |              | 0.044  |       |       | -1.03  | -1.11  | 1.03   | 1.07             | <i>Nucb1</i>                                           | nucleobindin 1                                                                         | 0007218 // response to cisplatin // inferred from electronic annotation//1903533 // reg        |
| NM_145610    |              |        | 0.035 |       | 1.14   | 1.16   | 1.03   | -1.16            | <i>Ppan</i>                                            | petar pan homolog (Drosophila)                                                         | 0000027 // ribosomal large subunit assembly // ---//0001560 // regulation of cell growt        |
| NM_0263      |              | 0.035  |       |       | 1.12   | -1.06  | 1.03   | 1.17             | <i>Ahctf1</i>                                          | AT hook containing transcription factor 1                                              | 0000910 // cytokinesis // not recorded//0006351 // transcription, DNA-templated // inf         |
| NM_1454      |              | 0.027  |       |       | -1.01  | 1.08   | 1.03   | -1.04            | <i>Prmt7</i>                                           | protein arginine N-methyltransferase 7                                                 | 0000387 // spliceosomal snRNP assembly // not recorded//0006349 // regulation of ger           |
| NM_0280      |              | 0.0231 |       |       | 1.02   | 1.12   | 1.03   | 1.07             | <i>Rpusd4</i>                                          | RNA pseudouridylylase domain containing 4                                              | 0001522 // pseudouridine synthesis // inferred from electronic annotation//0009451 //          |
| NM_001252218 | ///          | 0.041  |       |       | -1.09  | 1.02   | 1.03   | -1.02            | <i>LOC102641215///Rpl31///Rpl31-ps12///R</i>           | 60S ribosomal protein L31 pseudogene//ribosomal protein L31//ribosomal protein L       | 0002181 // cytoplasmic translation // ---//0006412 // translation // inferred from electr      |
| NM_033270    | ///NR        | 0.041  |       |       | -1.14  | -1.16  | 1.03   | -1.02            | <i>E2f6</i>                                            | E2F transcription factor 6                                                             | 0000083 // regulation of transcription involved in G1/S transition of mitotic cell cycle // ir |
| NM_0196      |              | 0.0115 | 0.014 |       | -1.40  | 1.00   | 1.03   | -1.21            | <i>Cpxm1</i>                                           | carboxypeptidase X1 (M14 family)                                                       | 0006508 // proteolysis // inferred from direct assay//0006518 // peptide metabolic proc        |
| NM_0115      |              | 0.0444 |       |       | -1.02  | 1.12   | 1.03   | 1.04             | <i>Gm9855///Tdg///Tdg-ps</i>                           | thymine DNA glycosylase pseudogene//thymine DNA glycosylase//thymine DNA glyco         | 0000122 // negative regulation of transcription from RNA polymerase II promoter // infer       |
| NM_001289782 | ///          | 0.003  | 0.026 |       | -1.26  | -1.25  | 1.03   | -1.00            | <i>Cryab</i>                                           | crystallin, alpha B                                                                    | 0001666 // response to hypoxia // inferred from mutant phenotype//0002088 // lens de           |
| NM_010809    |              |        | 0.012 | 0.027 | -1.56  | -1.37  | 1.03   | -1.19            | <i>Mmp3</i>                                            | matrix metallopeptidase 3                                                              | 0006508 // proteolysis // inferred from mutant phenotype//0006508 // proteolysis // nc         |
| NM_0094      |              | 0.0162 |       |       | 1.16   | -1.46  | 1.03   | 1.16             | <i>Top1</i>                                            | topoisomerase (DNA) I                                                                  | 0006260 // DNA replication // inferred from mutant phenotype//0006265 // DNA topok             |
| NM_0013      |              | 0.0418 |       |       | -1.03  | 1.18   | 1.03   | 1.06             | <i>Ube2v1</i>                                          | ubiquitin-conjugating enzyme E2 variant 1                                              | 0006301 // postreplication repair // ---//0042275 // error-free postreplication DNA rep        |
| NM_009517    | ///XM        | 0.047  | 0.03  |       | -1.07  | -1.02  | 1.03   | 1.07             | <i>Zmat3</i>                                           | zinc finger matrix type 3                                                              | 0006810 // transport // inferred from electronic annotation//0006915 // apoptotic proc         |
| NM_0256      |              | 0.0021 |       |       | 1.08   | -1.06  | 1.03   | 1.01             | <i>Mad211bp</i>                                        | MAD2L1 binding protein                                                                 | 0007093 // mitotic cell cycle checkpoint // not recorded//0007094 // mitotic spindle ass       |
| NM_207531    | ///XM        | 0.034  | 0.045 |       | -1.03  | -1.09  | 1.04   | 1.03             | <i>Agr3</i>                                            | anterior gradient 3                                                                    |                                                                                                |
| NM_0091      | #####        |        |       |       | -1.00  | -1.14  | 1.04   | 1.04             | <i>Sdf2</i>                                            | stromal cell derived factor 2                                                          | 0000032 // cell wall mannoprotein biosynthetic process // not recorded//0007275 // m           |
| NM_001005605 | ///NM_00     | 0.047  |       |       | -1.03  | -1.07  | 1.04   | 1.07             | <i>Aebp2</i>                                           | AE binding protein 2                                                                   | 0000122 // negative regulation of transcription from RNA polymerase II promoter // infer       |
| NM_0287      |              | 0.005  |       |       | -1.01  | 1.26   | 1.04   | 1.17             | <i>Gga2</i>                                            | golgi associated, gamma adaptin ear containing, ARF binding protein 2                  | 0006810 // transport // inferred from electronic annotation//0006886 // intracellular pr       |
| NM_001159329 | ///          | 0.038  |       |       | -1.11  | 1.01   | 1.04   | 1.02             | <i>Gtpbp8</i>                                          | GTP-binding protein 8 (putative)                                                       | 0000917 // barrier septum assembly // inferred from electronic annotation                      |
| NM_0010      |              | 0.0094 |       |       | -1.02  | 1.43   | 1.04   | -1.03            | <i>Evi2b///Gm21975</i>                                 | ecotropic viral integration site 2b//predicted gene 21975                              |                                                                                                |
| NM_001277932 | ///          | 0.029  |       |       | -1.02  | 1.07   | 1.04   | -1.02            | <i>Casp9</i>                                           | caspace 9                                                                              | 0006508 // proteolysis // not recorded//0006508 // proteolysis // inferred from review         |
| NM_001291105 | ///NM_00     | 0.021  |       |       | -1.06  | -1.10  | 1.04   | 1.05             | <i>E2f1</i>                                            | E2F transcription factor 1                                                             | 0000077 // DNA damage checkpoint // not recorded//0000122 // negative regulation of            |
| NM_013770    |              |        | 0.013 |       | 1.26   | 1.27   | 1.04   | 1.04             | <i>Slc25a10</i>                                        | solute carrier family 25 (mitochondrial carrier, dicarboxylate transporter), member 10 | 0006810 // transport // inferred from electronic annotation//0006817 // phosphate ion          |
| NM_0213      |              | 0.0151 | 0.043 | 1.32  | 1.87   | 1.04   | -1.07  | <i>Tnfrsf13b</i> | tumor necrosis factor receptor superfamily, member 13b | 0001782 // B cell homeostasis // inferred from direct assay//0001782 // B cell homeost |                                                                                                |
| NM_138668    | ///XM_006505 |        | 0.009 |       | -1.04  | 1.02   | 1.04   | 1.13             | <i>Ufsp2</i>                                           | UFM1-specific peptidase 2                                                              | 0006508 // proteolysis // not recorded//0006508 // proteolysis // inferred from direct         |
| NM_0305      |              | 0.0208 | 0.05  |       | -1.16  | 1.03   | 1.04   | -1.06            | <i>Slc19a3</i>                                         | solute carrier family 19, member 3                                                     | 0006810 // transport // inferred from electronic annotation//0015884 // folic acid trans       |
| NM_001111274 | ///          | 0.044  |       |       | -1.32  | -1.17  | 1.04   | -1.11            | <i>Igf1</i>                                            | insulin-like growth factor 1                                                           | 0001649 // osteoblast differentiation // inferred from expression pattern//0001775 // c        |
| NM_1831      |              | 0.01   |       |       | 1.03   | 1.17   | 1.04   | 1.03             | <i>Pyroxd1</i>                                         | pyridine nucleotide-disulphide oxidoreductase domain 1                                 | 0005114 // oxidation-reduction process // inferred from electronic annotation                  |
| NM_001291104 | ///          | 0.017  |       |       | -1.07  | -1.05  | 1.04   | -1.08            | <i>Fgf11</i>                                           | fibroblast growth factor 11                                                            |                                                                                                |
| NM_0010      |              | 0.0475 |       |       | -1.15  | 1.19   | 1.04   | -1.06            | <i>Clec5a</i>                                          | C-type lectin domain family 5, member a                                                | 0002076 // osteoblast development // inferred from direct assay//0002376 // immune s           |
| NM_0010      |              | 0.0477 |       |       | -1.01  | 1.07   | 1.04   | 1.01             | <i>Erbp2</i>                                           | v-erb-b2 erythroblastic leukemia viral oncogene homolog 2, neuro/glioblastoma deriv    | 0001889 // liver development // inferred from electronic annotation//0001934 // posit          |
| NM_016680    | ///NR_125832 |        | 0.026 |       | 1.00   | 1.04   | 1.04   | -1.27            | <i>Clasrp</i>                                          | CLK4-associating serine/arginine rich protein                                          | 0006397 // mRNA processing // inferred from electronic annotation//0008380 // RNA sp           |
| NM_001290658 | ///NM_02     |        | 0.044 |       | 1.04   | -1.03  | 1.04   | -1.04            | <i>Pomgnt1</i>                                         | protein O-linked mannose beta 1,2-N-acetylglucosaminyltransferase                      | 0006486 // protein glycosylation // inferred from electronic annotation//0006493 // prc        |
| NM_0281      |              | 0.021  |       |       | -1.15  | 1.02   | 1.04   | 1.05             | <i>Tram1</i>                                           | translocating chain-associating membrane protein 1                                     | 0006810 // transport // inferred from electronic annotation//0015031 // protein transp         |
| NM_0270      |              | 0.0351 |       |       | 1.00   | -1.10  | 1.04   | 1.09             | <i>Sec62</i>                                           | SEC62 homolog (S. cerevisiae)                                                          | 0006620 // posttranslational protein targeting to membrane // not recorded//0006810 ,          |
| NM_001048206 | ///NM_00     | 0.032  |       |       | 1.00   | -1.01  | 1.04   | 1.10             | <i>Traf3</i>                                           | TNF receptor-associated factor 3                                                       | 0001817 // regulation of cytokine production // inferred from mutant phenotype//0002           |
| NM_001290430 | ///NM_13     |        | 0.032 |       | -1.04  | 1.10   | 1.04   | 1.11             | <i>Ftsj1</i>                                           | FtsJ homolog 1 (E. coli)                                                               | 0001510 // RNA methylation // inferred from electronic annotation//0002128 // tRNA N           |
| NM_001122822 | ///          | 0.02   |       |       | -1.02  | 1.01   | 1.04   | 1.02             | <i>LOC105242468///Wrn</i>                              | Werner syndrome ATP-dependent helicase homolog//Werner syndrome homolog (hu            | 0000723 // telomere maintenance // inferred from genetic interaction//0000723 // telo          |
| NM_1336      |              | 0.0166 |       |       | 1.05   | -1.12  | 1.04   | 1.07             | <i>Ces1e</i>                                           | carboxylesterase 1E                                                                    | 0008152 // metabolic process // inferred from electronic annotation//0016042 // lipid c        |
| NM_1332      |              | 0.0189 |       |       | -1.08  | 1.15   | 1.04   | -1.12            | <i>Pilrb1</i>                                          | paired immunoglobulin-like type 2 receptor beta 1                                      | 0001773 // myeloid dendritic cell activation // inferred from direct assay//0007169 // tr      |
| NM_0231      | #####        |        |       |       | -1.05  | -2.56  | 1.04   | -1.18            | <i>Klf15</i>                                           | Kruppel-like factor 15                                                                 | 0006351 // transcription, DNA-templated // inferred from electronic annotation//00063          |

| RefSeq       | Tri         | p 24h  | p 48h | p 72h | FD Air | FD 24h | FD 48h | FD 72h | Gene Symbol                                 | Gene Title                                                                               | Gene Ontology Biological Process                                                           |
|--------------|-------------|--------|-------|-------|--------|--------|--------|--------|---------------------------------------------|------------------------------------------------------------------------------------------|--------------------------------------------------------------------------------------------|
| NM_1455      |             | 0.0471 |       |       | 1.04   | -1.07  | 1.04   | 1.12   | <i>Tipr1</i>                                | TIP41, TOR signalling pathway regulator-like (S. cerevisiae)                             | 0000077 // DNA damage checkpoint // not recorded//0034048 // negative regulation of        |
| NM_1785      |             | 0.0442 |       |       | -1.05  | 1.10   | 1.04   | -1.10  | <i>Ptrh1</i>                                | peptidyl-tRNA hydrolase 1 homolog (S. cerevisiae)                                        | 0008152 // metabolic process // inferred from electronic annotation                        |
| NM_0013      |             | 0.017  |       |       | 1.03   | 1.17   | 1.04   | -1.02  | <i>Ints7</i>                                | integrator complex subunit 7                                                             | 0000077 // DNA damage checkpoint // not recorded//0006974 // cellular response to D        |
| NM_001033293 | ///XR_374   | 0.039  |       |       | 1.05   | 1.31   | 1.04   | -1.01  | <i>Uap11</i>                                | UDP-N-acetylglucosamine pyrophosphorylase 1-like 1                                       | 0006048 // UDP-N-acetylglucosamine biosynthetic process // ---//0008152 // metabolic       |
| NM_001033136 | ///         | 0.047  |       |       | -1.04  | -1.15  | 1.04   | 1.03   | <i>Rmdn3</i>                                | regulator of microtubule dynamics 3                                                      | 0006874 // cellular calcium ion homeostasis // not recorded//0006915 // apoptotic proc     |
| NM_001044720 | ///NM_00    | 0.021  |       |       | -1.17  | -1.11  | 1.04   | 1.17   | <i>Abcc9</i>                                | ATP-binding cassette, sub-family C (CFTR/MRP), member 9                                  | 0006810 // transport // inferred from electronic annotation//0006813 // potassium ion      |
| NM_0011      |             | 0.0425 |       |       | 1.01   | 1.11   | 1.04   | -1.11  | <i>Emc6</i>                                 | ER membrane protein complex subunit 6                                                    | 0000045 // autophagosome assembly // not recorded//0034975 // protein folding in p         |
| NM_201407    | ///XM_00650 | 0.046  |       |       | 1.05   | 1.08   | 1.04   | -1.10  | <i>Dennd4b</i>                              | DENN/MADD domain containing 4B                                                           | 0032483 // regulation of Rab protein signal transduction // not recorded//0043547 // in pi |
| NM_009431    |             |        | 0.043 |       | 1.12   | 1.06   | 1.04   | -1.09  | <i>Ctr9</i>                                 | Ctr9, Paf1/RNA polymerase II complex component, homolog (S. cerevisiae)                  | 0000122 // negative regulation of transcription from RNA polymerase II promoter // infer   |
| NM_1341      |             | 0.0155 | 0.012 |       | -1.11  | 1.04   | 1.04   | -1.07  | <i>Yars</i>                                 | tyrosyl-tRNA synthetase                                                                  | 0006412 // translation // inferred from electronic annotation//0006418 // tRNA aminoa      |
| NM_028431    |             |        | 0.015 |       | -1.03  | 1.00   | 1.04   | 1.12   | <i>Pmpcb</i>                                | peptidase (mitochondrial processing) beta                                                | 0006122 // mitochondrial electron transport, ubiquinol to cytochrome c // not recorded//   |
| NM_178589    |             | 0.026  |       |       | -1.09  | -1.13  | 1.04   | 1.18   | <i>Tnfrsf21</i>                             | tumor necrosis factor receptor superfamily, member 21                                    | 0001783 // B cell apoptotic process // inferred from mutant phenotype//0002250 // ad       |
| NM_0010      | #####       | #####  |       |       | -1.19  | 1.35   | 1.04   | -1.13  | <i>Mcoln2</i>                               | mucopolin 2                                                                              | 0006810 // transport // inferred from electronic annotation//0006811 // ion transport /    |
| NM_0137      |             | 0.0393 |       |       | -1.14  | 1.05   | 1.04   | -1.03  | <i>Nbn</i>                                  | nibrin                                                                                   | 0000077 // DNA damage checkpoint // not recorded//0000723 // telomere maintenanc           |
| NM_0010      |             | 0.0456 |       |       | 1.01   | -1.02  | 1.04   | 1.17   | <i>Rap1gds1</i>                             | RAP1, GTP-GDP dissociation stimulator 1                                                  | 0007264 // small GTPase mediated signal transduction // not recorded//0014829 // vas       |
| NM_0013      |             | 0.0316 |       |       | 1.21   | -1.03  | 1.04   | 1.24   | <i>Porcn</i>                                | porcupine homolog (Drosophila)                                                           | 0006497 // protein lipidation // inferred from direct assay//0009100 // glycoprotein me    |
| NM_025834    | ///XM_0024  |        |       |       | -1.13  | 1.02   | 1.04   | -1.14  | <i>Proz</i>                                 | protein Z, vitamin K-dependent plasma glycoprotein                                       | 0006508 // proteolysis // inferred from electronic annotation//0007596 // blood coagul     |
| NM_1459      |             | 0.0495 | 0.025 |       | -1.09  | 1.00   | 1.04   | 1.10   | <i>Alg3</i>                                 | asparagine-linked glycosylation 3 (alpha-1,3-mannosyltransferase)                        | 0006486 // protein glycosylation // inferred from electronic annotation//0097502 // ma     |
| NM_009261    | ///NM_0003  |        |       |       | -1.12  | 1.01   | 1.04   | -1.00  | <i>Strbp</i>                                | spermatid perinuclear RNA binding protein                                                | 0006928 // movement of cell or subcellular component // inferred from mutant phenoty       |
| NM_0012      |             | 0.0263 |       |       | 1.02   | 1.11   | 1.04   | 1.02   | <i>Rad51d</i>                               | RAD51 homolog D                                                                          | 0000707 // meiotic DNA recombinase assembly // not recorded//0000723 // telomere n         |
| NM_001290495 | ///NM_00    | 0.018  |       |       | 1.04   | 1.13   | 1.04   | 1.12   | <i>Trub2</i>                                | TruB pseudouridine (psi) synthase homolog 2 (E. coli)                                    | 0001522 // pseudouridine synthesis // inferred from electronic annotation//0006396 //      |
| NM_0197      |             | 0.0058 |       |       | -1.13  | -1.63  | 1.04   | 1.09   | <i>Foxo3</i>                                | forkhead box O3                                                                          | 0000122 // negative regulation of transcription from RNA polymerase II promoter // not i   |
| NM_0091      |             | 0.0333 | 0.039 |       | 1.07   | -1.04  | 1.04   | 1.16   | <i>Slc1a1</i>                               | solute carrier family 1 (neuronal/epithelial high affinity glutamate transporter, system | 0006810 // transport // inferred from electronic annotation//0006835 // dicarboxylic ac    |
| NM_0198      |             | 0.0237 |       |       | -1.04  | -1.25  | 1.04   | -1.02  | <i>Ube2g2</i>                               | ubiquitin-conjugating enzyme E2G 2                                                       | 0000209 // protein polyubiquitination // not recorded//0016567 // protein ubiquitinat      |
| NM_030153    | ///XM_00651 | 0.021  |       |       | -1.01  | -1.12  | 1.04   | 1.14   | <i>Naa35</i>                                | N(alpha)-acetyltransferase 35, NatC auxiliary subunit                                    | 0043066 // negative regulation of apoptotic process // not recorded//0048659 // smoo       |
| NM_001134465 | ///         | 0.043  |       |       | -1.02  | -1.05  | 1.04   | 1.01   | <i>Dennd6a</i>                              | DENN/MADD domain containing 6A                                                           | 0043547 // positive regulation of GTPase activity // not recorded//2000049 // positive r   |
| NM_0268      |             | 0.0251 | 0.04  |       | -1.05  | 1.10   | 1.04   | -1.06  | <i>Dus1</i>                                 | dihydrouridine synthase 1-like (S. cerevisiae)                                           | 0002943 // tRNA dihydrouridine synthesis // not recorded//0008033 // tRNA processin        |
| NM_001038625 | ///         | 0.018  | 0.035 |       | 1.23   | 1.26   | 1.04   | 1.08   | <i>Sertad2</i>                              | SERTA domain containing 2                                                                | 0006351 // transcription, DNA-templated // inferred from electronic annotation//00063      |
| NM_138589    | ///XM_0025  |        |       |       | -1.07  | -1.12  | 1.04   | -1.02  | <i>Ubf1d</i>                                | ubiquitin family domain containing 1                                                     |                                                                                            |
| NM_0012      |             | 0.0267 |       |       | -1.05  | 1.11   | 1.04   | -1.06  | <i>Ndufs8</i>                               | NADH dehydrogenase (ubiquinone) Fe-S protein 8                                           | 0006810 // transport // inferred from electronic annotation//0006979 // response to ox     |
| NM_146247    | ///XM_00652 | 0.007  |       |       | 1.03   | 1.06   | 1.04   | -1.19  | <i>Mettl22</i>                              | methyltransferase like 22                                                                | 0032259 // methylation // inferred from electronic annotation                              |
| NM_0257      |             | 0.0113 |       |       | -1.17  | 1.00   | 1.04   | -1.07  | <i>Acot13</i>                               | acyl-CoA thioesterase 13                                                                 | 0008152 // metabolic process // inferred from electronic annotation//0051289 // protei     |
| NM_0012      |             | 0.0033 | 0.034 |       | 1.09   | -1.04  | 1.04   | -1.03  | <i>Dpf2</i>                                 | D4, zinc and double PHD fingers family 2                                                 | 0006351 // transcription, DNA-templated // inferred from electronic annotation//00063      |
| NM_020594    | ///XM_0023  |        |       |       | -1.07  | -1.02  | 1.04   | -1.02  | <i>Zc3h8</i>                                | zinc finger CCHC type containing 8                                                       | 0000122 // negative regulation of transcription from RNA polymerase II promoter // infer   |
| NM_001310837 | ///NM_01    | 0.022  |       |       | 1.03   | -1.11  | 1.04   | 1.21   | <i>Sspn</i>                                 | sarcospan                                                                                |                                                                                            |
| NM_011914    |             |        | 0.039 |       | 1.01   | 1.05   | 1.04   | -1.14  | <i>Nelfa</i>                                | negative elongation factor complex member A, Whsc2                                       | 0006351 // transcription, DNA-templated // inferred from electronic annotation//00063      |
| NM_0010      |             | 0.0187 |       |       | 1.01   | -1.05  | 1.04   | 1.00   | <i>Rtn3</i>                                 | reticulon 3                                                                              | 0006810 // transport // inferred from electronic annotation//0006915 // apoptotic proc     |
| NM_0080      |             | 0.0252 |       |       | 1.05   | 1.23   | 1.05   | 1.14   | <i>G6pdx</i> ///G6pd2                       | glucose-6-phosphate dehydrogenase X-linked//glucose-6-phosphate dehydrogenase            | 0001816 // cytokine production // inferred from mutant phenotype//0001998 // angiot        |
| NM_1340      |             | 0.0462 |       |       | 1.08   | -1.07  | 1.05   | 1.13   | <i>Tmed4</i>                                | transmembrane emp24 protein transport domain containing 4                                | 0006810 // transport // inferred from electronic annotation//0007165 // signal transduc    |
| NM_0114      |             | 0.0497 |       |       | -1.12  | 1.04   | 1.05   | -1.16  | <i>Strap</i>                                | serine/threonine kinase receptor associated protein                                      | 0000122 // negative regulation of transcription from RNA polymerase II promoter // infer   |
| NM_0012      |             | 0.0378 |       |       | 1.08   | -1.19  | 1.05   | 1.38   | <i>Cldnd1</i>                               | claudin domain containing 1                                                              |                                                                                            |
| NM_145460    | ///XR_0006  |        |       |       | -1.08  | -1.05  | 1.05   | -1.08  | <i>Oxnad1</i>                               | oxidoreductase NAD-binding domain containing 1                                           | 0055114 // oxidation-reduction process // inferred from electronic annotation              |
| NM_001198823 | ///NM_00    | 0.018  |       |       | 1.01   | 1.03   | 1.05   | 1.14   | <i>App</i>                                  | amyloid beta (A4) precursor protein                                                      | 0001878 // response to yeast // not recorded//0001967 // suckling behavior // inferred     |
| NM_133223    |             |        | 0.026 |       | 1.18   | 1.40   | 1.05   | 1.04   | <i>Rac3</i>                                 | RAS-related C3 botulinum substrate 3                                                     | 0007264 // small GTPase mediated signal transduction // inferred from electronic annota    |
| NM_016918    | ///XM_0041  |        |       |       | -1.03  | -1.04  | 1.04   | 1.02   | <i>Nudt5</i>                                | nudix (nucleoside diphosphate linked moiety X)-type motif 5                              | 0006139 // nucleobase-containing compound metabolic process // inferred from direct a      |
| NM_001123327 | ///XM_00    | 0.003  |       |       | -1.11  | -1.10  | 1.05   | 1.11   | <i>Qser1</i>                                | glutamine and serine rich 1                                                              |                                                                                            |
| NM_0168      |             | 0.0194 |       |       | 1.01   | 1.17   | 1.05   | 1.24   | <i>Rab25</i>                                | RAB25, member RAS oncogene family                                                        | 0003382 // epithelial cell morphogenesis // inferred from mutant phenotype//0006810        |
| NM_025901    |             |        | 0.027 |       | -1.10  | -1.04  | 1.05   | -1.07  | <i>Polr3k</i>                               | polymerase (RNA) III (DNA directed) polypeptide K                                        | 0002376 // immune system process // inferred from electronic annotation//0006351 //        |
| NM_1455      |             | 0.0291 |       |       | 1.02   | 1.14   | 1.05   | 1.05   | <i>Rabepk</i>                               | Rab9 effector protein with kelch motifs                                                  |                                                                                            |
| NM_001099298 | ///         | 0.016  |       |       | -1.05  | -1.04  | 1.05   | -1.14  | <i>Scn2a1</i>                               | sodium channel, voltage-gated, type II, alpha 1                                          | 0006810 // transport // inferred from electronic annotation//0006811 // ion transport /    |
| NM_1342      |             | 0.011  |       |       | -1.03  | -1.32  | 1.05   | 1.19   | <i>Elov15</i>                               | ELOVL family member 5, elongation of long chain fatty acids (yeast)                      | 0006629 // lipid metabolic process // inferred from electronic annotation//0006631 // f    |
| NM_028394    | ///XM_0027  | 0.034  |       |       | -1.22  | -1.15  | 1.05   | -1.04  | <i>Hspb11</i>                               | heat shock protein family B (small), member 11                                           | 0001501 // skeletal system development // inferred from mutant phenotype//0006810 ,        |
| NM_0253      |             | 0.0323 |       |       | 1.04   | 1.16   | 1.05   | 1.04   | <i>Dnajc15</i>                              | Dnaj (Hsp40) homolog, subfamily C, member 15                                             | 0006810 // transport // inferred from electronic annotation//0009267 // cellular respon    |
| NM_0013      |             | 0.0378 |       |       | -1.06  | 1.07   | 1.05   | 1.00   | <i>Cox16</i>                                | cytochrome c oxidase assembly protein 16                                                 |                                                                                            |
| NM_0012      |             | 0.032  |       |       | 1.07   | 1.25   | 1.05   | 1.19   | <i>Slc10a3</i>                              | solute carrier family 10 (sodium/bile acid cotransporter family), member 3               | 0006810 // transport // inferred from electronic annotation//0010033 // response to or     |
| NM_0120      |             | 0.0014 |       |       | -1.04  | 1.13   | 1.05   | -1.06  | <i>Srp9</i>                                 | signal recognition particle 9                                                            | 0006814 // SRP-dependent cotranslational protein targeting to membrane // inferred fr      |
| NM_0271      |             | 0.0037 |       |       | 1.03   | -1.06  | 1.05   | 1.13   | <i>Esam</i>                                 | endothelial cell-specific adhesion molecule                                              | 0007155 // cell adhesion // inferred from electronic annotation//0007156 // homophilic     |
| NM_0259      |             | 0.0343 |       |       | 1.08   | 1.25   | 1.05   | 1.03   | <i>Efh2</i>                                 | EF hand domain containing 2                                                              |                                                                                            |
| NM_0265      |             | 0.0227 |       |       | -1.13  | 1.06   | 1.05   | -1.03  | <i>LOC102642137</i> ///Rps13//Rps13-ps1//Rp | 40S ribosomal protein S13//ribosomal protein S13//ribosomal protein S13, pseudog         | 0006412 // translation // not recorded//0033119 // negative regulation of RNA splicing ,   |
| NM_0012      |             | 0.0435 |       |       | 1.05   | 1.35   | 1.05   | 1.06   | <i>Sqstm1</i>                               | sequestosome 1                                                                           | 0001934 // positive regulation of protein phosphorylation // not recorded//0002376 // i    |
| NM_0233      |             | 0.0489 | 0.048 |       | -1.03  | 1.09   | 1.05   | 1.10   | <i>Snap29</i>                               | synaptosomal-associated protein 29                                                       | 0006810 // transport // inferred from electronic annotation//0006887 // exocytosis // n    |
| NM_0115      |             | 0.0021 |       |       | -1.09  | 1.10   | 1.05   | 1.18   | <i>Surf4</i>                                | surfeit gene 4                                                                           | 0007030 // Golgi organization // not recorded//0010638 // positive regulation of organe    |
| NM_0011      |             | 0.049  |       |       | -1.08  | 1.12   | 1.05   | 1.01   | <i>Naip2</i>                                | NLR family, apoptosis inhibitory protein 2                                               | 0002376 // immune system process // inferred from electronic annotation//0006915 //        |
| NM_0011      |             | 0.0037 |       |       | 1.03   | -1.12  | 1.05   | 1.01   | <i>Cacul1</i>                               | CDK2 associated, cullin domain 1                                                         | 0000082 // G1/S transition of mitotic cell cycle // not recorded//0006511 // ubiquitin-de  |

| RefSeq       | Tri     | p 24h  | p 48h | p 72h | FD Air | FD 24h | FD 48h | FD 72h | Gene Symbol                                   | Gene Title                                                                               | Gene Ontology Biological Process                                                          |
|--------------|---------|--------|-------|-------|--------|--------|--------|--------|-----------------------------------------------|------------------------------------------------------------------------------------------|-------------------------------------------------------------------------------------------|
| NM_0135      |         | 0.014  |       |       | -1.01  | -1.28  | 1.05   | -1.20  | <i>Mbd1</i>                                   | methyl-CpG binding domain protein 1                                                      | 0000122 // negative regulation of transcription from RNA polymerase II promoter // not r  |
| NM_009837    |         |        | 0.009 |       | -1.09  | -1.17  | 1.05   | -1.14  | <i>Cct4</i>                                   | chaperonin containing Tcp1, subunit 4 (delta)                                            | 0006457 // protein folding // inferred from electronic annotation//0007339 // binding c   |
| NM_0271      |         | 0.0316 |       |       | 1.05   | 1.24   | 1.05   | 1.09   | <i>Nup37</i>                                  | nucleoporin 37                                                                           | 0006810 // transport // inferred from electronic annotation//0007049 // cell cycle // inf |
| NM_145946    | //XM    |        | 0.03  |       | -1.06  | -1.04  | 1.05   | -1.04  | <i>Fanci</i>                                  | Fanconi anemia, complementation group I                                                  | 0006281 // DNA repair // inferred from electronic annotation//0006974 // cellular resp    |
| NM_0311      |         | 0.0214 | 0.041 |       | -1.27  | -1.56  | 1.05   | -1.00  | <i>Hspa8</i>                                  | heat shock protein 8                                                                     | 0001916 // positive regulation of T cell mediated cytotoxicity // not recorded//0006351   |
| NM_0011      |         | 0.0291 |       | 0.027 | -1.02  | 1.08   | 1.05   | 1.14   | <i>Igsf5</i>                                  | immunoglobulin superfamily, member 5                                                     | 0016337 // single organismal cell-cell adhesion // inferred from direct assay//0050767 // |
| NM_0115      |         | 0.0268 | 0.031 |       | -1.28  | 1.04   | 1.05   | -1.26  | <i>Alyref</i> // <i>Alyref2</i>               | Aly/REF export factor//Aly/REF export factor 2                                           | 0006397 // mRNA processing // inferred from electronic annotation//0006406 // mRNA        |
| NM_0168      |         | 0.0162 |       |       | 1.15   | -1.13  | 1.05   | 1.17   | <i>Usp2</i>                                   | ubiquitin specific peptidase 2                                                           | 0000122 // negative regulation of transcription from RNA polymerase II promoter // not r  |
| NM_0011      |         | 0.0125 | 0.041 |       | -1.09  | 1.09   | 1.05   | -1.08  | <i>Col18a1</i>                                | collagen, type XVIII, alpha 1                                                            | 0001525 // angiogenesis // inferred from direct assay//0001525 // angiogenesis // infer   |
| NM_011817    |         |        | 0.033 |       | -1.34  | -1.04  | 1.05   | -1.74  | <i>Gadd45g</i>                                | growth arrest and DNA-damage-inducible 45 gamma                                          | 0000185 // activation of MAPKK activity // not recorded//0000186 // activation of MAI     |
| NM_027256    | //XM    | 0.0650 | 0.044 |       | -1.06  | 1.02   | 1.05   | 1.09   | <i>Ints4</i>                                  | integrator complex subunit 4                                                             | 0016180 // snRNA processing // not recorded                                               |
| NM_0093      |         | 0.0424 |       |       | -1.01  | 1.13   | 1.05   | -1.05  | <i>Tfam</i>                                   | transcription factor A, mitochondrial                                                    | 0006338 // chromatin remodeling // not recorded//0006351 // transcription, DNA-temp       |
| NM_133435    | //XM    | 0.0653 | 0.028 |       | -1.01  | 1.11   | 1.05   | 1.26   | <i>Nmnat1</i>                                 | nicotinamide nucleotide adenyltransferase 1                                              | 0006457 // protein folding // non-traceable author statement//0006511 // ubiquitin-de     |
| NM_175195    | //XM    | 0.0651 | 0.047 |       | 1.07   | 1.08   | 1.05   | -1.14  | <i>Spl2b</i>                                  | signal peptide peptidase like 2B                                                         | 0006508 // proteolysis // inferred from electronic annotation//0006509 // membrane p      |
| NM_1337      |         | 0.0259 |       |       | 1.08   | 1.19   | 1.05   | 1.03   | <i>Dcp1a</i>                                  | DCP1 decapping enzyme homolog A (S. cerevisiae)                                          | 0000184 // nuclear-transcribed mRNA catabolic process, nonsense-mediated decay // inf     |
| NM_0307      |         | 0.0408 |       |       | 1.02   | 1.10   | 1.05   | -1.02  | <i>Uck2</i>                                   | uridine-cytidine kinase 2                                                                | 0006206 // pyrimidine nucleobase metabolic process // not recorded//0006222 // UMP        |
| NM_0111      |         | 0.0136 |       |       | -1.11  | 1.18   | 1.05   | 1.09   | <i>Psmb5</i>                                  | proteasome (prosome, macropain) subunit, beta type 5                                     | 0006508 // proteolysis // inferred from electronic annotation//0006979 // response to c   |
| NM_022980    |         | #####  |       |       | -1.17  | -1.06  | 1.05   | -1.05  | <i>Rcan3</i>                                  | regulator of calcineurin 3                                                               | 0019722 // calcium-mediated signaling // inferred from electronic annotation//005079C     |
| NM_008389    | //XM    | 0.0650 | 0.034 |       | 1.02   | 1.06   | 1.05   | 1.10   | <i>Ipp</i>                                    | IAP promoted placental gene                                                              | 0016567 // protein ubiquitination // not recorded                                         |
| NM_172739    | //XM    |        | 0.026 |       | 1.17   | 1.12   | 1.05   | 1.24   | <i>Arhgap35</i>                               | Rho GTPase activating protein 35                                                         | 0000122 // negative regulation of transcription from RNA polymerase II promoter // not r  |
| NM_0110      |         | 0.0362 |       |       | -1.17  | 1.26   | 1.05   | -1.13  | <i>Pfn1</i>                                   | profilin 1                                                                               | 0001843 // neural tube closure // inferred from genetic interaction//0006357 // regulat   |
| NM_0011      |         | 0.0048 |       |       | 1.05   | 1.38   | 1.05   | 1.23   | <i>Arpc4</i>                                  | actin related protein 2/3 complex, subunit 4                                             | 0030041 // actin filament polymerization // inferred from electronic annotation//00343    |
| NM_001252519 | //      | 0.016  | 0.049 |       | -1.10  | -1.03  | 1.05   | -1.05  | <i>Zfp82</i>                                  | zinc finger protein 82                                                                   | 0006351 // transcription, DNA-templated // inferred from electronic annotation//00063     |
| NM_0080      |         | 0.0474 | 0.01  |       | -1.06  | 1.10   | 1.05   | 1.09   | <i>Fgf7</i>                                   | fibroblast growth factor 7                                                               | 0001541 // ovarian follicle development // not recorded//0002230 // positive regulator    |
| NM_0111      |         | 0.0428 |       |       | -1.02  | 1.22   | 1.05   | 1.31   | <i>Psmc1</i>                                  | proteasome (prosome, macropain) activator subunit 1 (PA28 alpha)                         | 0002479 // antigen processing and presentation of exogenous peptide antigen via MHC c     |
| NM_0263      |         | 0.0493 |       |       | -1.06  | 1.11   | 1.05   | -1.01  | <i>Tceb2</i> // <i>Gm9238</i>                 | transcription elongation factor B (SIII), polypeptide 2//transcription elongation factor | 0006351 // transcription, DNA-templated // inferred from electronic annotation//00063     |
| NM_0012      |         | 0.0227 |       |       | 1.02   | -1.37  | 1.06   | 1.04   | <i>Cadps2</i>                                 | Ca2+-dependent activator protein for secretion 2                                         | 0006810 // transport // inferred from electronic annotation//0006887 // exocytosis // ir  |
| NM_001190258 | //NM_02 | 0.039  |       |       | 1.07   | 1.09   | 1.06   | -1.01  | <i>Rps27</i> // <i>Rps27rt</i>                | ribosomal protein S27//ribosomal protein S27, retrogene                                  | 0006412 // translation // inferred from electronic annotation                             |
| NM_0255      |         | 0.0024 | 0.005 |       | -1.15  | -1.01  | 1.06   | -1.16  | <i>Copsr</i>                                  | coordinator of PRMT5, differentiation stimulator                                         | 0006351 // transcription, DNA-templated // inferred from electronic annotation//00063     |
| NM_0235      |         | 0.032  |       |       | -1.05  | 1.15   | 1.06   | 1.02   | <i>Pecr</i>                                   | peroxisomal trans-2-enoyl-CoA reductase                                                  | 0006629 // lipid metabolic process // inferred from electronic annotation//0006631 // f   |
| NM_0010      |         | 0.0177 |       |       | 1.03   | -1.24  | 1.06   | 1.10   | <i>Cadm1</i>                                  | cell adhesion molecule 1                                                                 | 0001889 // liver development // not recorded//0002376 // immune system process // i       |
| NM_001293644 | //NM_02 | 0.026  |       |       | -1.07  | 1.03   | 1.06   | 1.22   | <i>Ccdc109b</i>                               | coiled-coil domain containing 109B                                                       | 0006810 // transport // inferred from electronic annotation//0006811 // ion transport /   |
| NM_010683    |         | 0.041  | 0.01  |       | -1.01  | -1.06  | 1.06   | 1.12   | <i>Lamc1</i>                                  | laminin, gamma 1                                                                         | 0006461 // protein complex assembly // not recorded//0007155 // cell adhesion // not r    |
| NM_001034097 | //NM_00 | 0.026  |       |       | 1.04   | 1.14   | 1.06   | 1.27   | <i>Tnfrsf13</i> // <i>Tnfrsfm13</i>           | tumor necrosis factor (ligand) superfamily, member 13//tumor necrosis factor (ligand     | 0000125 // angiogenesis // inferred from electronic annotation//0002376 // immune sy      |
| NM_0010      |         | 0.0224 |       |       | -1.07  | -1.36  | 1.06   | 1.09   | <i>Dusp16</i>                                 | dual specificity phosphatase 16                                                          | 0000188 // inactivation of MAPK activity // inferred from direct assay//0006470 // prote  |
| NM_0012      |         | 0.0425 |       |       | 1.04   | -1.20  | 1.06   | 1.08   | <i>Slit2</i>                                  | slit homolog 2 (Drosophila)                                                              | 0001656 // metanephros development // inferred from mutant phenotype//0001657 //          |
| NM_015814    | //XM    |        | 0.01  |       | -1.24  | -1.26  | 1.06   | -1.05  | <i>Dkk3</i>                                   | dickkopf homolog 3 (Xenopus laevis)                                                      | 0007275 // multicellular organismal development // inferred from electronic annotation/   |
| NM_0257      |         | 0.0088 |       |       | 1.01   | -1.10  | 1.06   | 1.08   | <i>Cy85a</i>                                  | cytochrome b5 type A (microsomal)                                                        | 0006631 // fatty acid metabolic process // inferred by curator//0006810 // transport //   |
| NM_0157      |         | 0.0336 |       |       | 1.10   | 1.02   | 1.06   | 1.34   | <i>Tmprss2</i>                                | transmembrane protease, serine 2                                                         | 0006508 // proteolysis // inferred from direct assay//0006508 // proteolysis // not rec   |
| NM_008579    | //XM    | 0.0649 | 0.049 |       | -1.03  | -1.23  | 1.06   | 1.19   | <i>Meig1</i>                                  | meiosis expressed gene 1                                                                 | 0007283 // spermatogenesis // inferred from electronic annotation//0030154 // cell diff   |
| NM_0012      |         | 0.0448 | 0.046 |       | -1.06  | 1.05   | 1.06   | 1.03   | <i>Kif3a</i>                                  | kinesin family member 3A                                                                 | 0001701 // in utero embryonic development // inferred from genetic interaction//00018     |
| NM_0011      |         | 0.0242 |       |       | 1.06   | -1.09  | 1.06   | 1.21   | <i>Shoc2</i>                                  | soc-2 (suppressor of clear) homolog (C. elegans)                                         | 0046579 // positive regulation of Ras protein signal transduction // not recorded         |
| NM_0254      |         | 0.0115 |       |       | -1.16  | 1.19   | 1.06   | -1.20  | <i>Rps4l</i>                                  | ribosomal protein S4-like                                                                | 0006412 // translation // ---//0006412 // translation // inferred from electronic annotat |
| NM_0102      |         | 0.0339 |       |       | 1.11   | 2.51   | 1.06   | 1.09   | <i>Fos</i>                                    | FBJ osteosarcoma oncogene                                                                | 0001661 // conditioned taste aversion // inferred from electronic annotation//0006355     |
| NM_008231    | //XM    |        | 0.042 |       | 1.13   | 1.06   | 1.06   | 1.01   | <i>Hdgf</i>                                   | hepatoma-derived growth factor                                                           | 0000122 // negative regulation of transcription from RNA polymerase II promoter // not r  |
| NM_1979      |         | 0.0018 |       |       | 1.18   | -1.11  | 1.06   | 1.12   | <i>Ces2g</i>                                  | carboxylesterase 2G                                                                      | 0008152 // metabolic process // inferred from electronic annotation                       |
| NM_0252      |         | 0.0011 |       |       | 1.01   | -1.09  | 1.06   | 1.11   | <i>Atp6v0e</i>                                | ATPase, H+ transporting, lysosomal V0 subunit E                                          | 0006810 // transport // inferred from electronic annotation//0006811 // ion transport /   |
| NM_001122683 | //      | 0.001  | 0.047 |       | -1.07  | -1.03  | 1.06   | 1.14   | <i>Bdh1</i>                                   | 3-hydroxybutyrate dehydrogenase, type 1                                                  | 0008152 // metabolic process // inferred from electronic annotation//00055114 // oxidat   |
| NM_0214      |         | 0.0068 | 0.018 |       | -1.03  | 1.05   | 1.06   | 1.08   | <i>Slc35b4</i>                                | solute carrier family 35, member B4                                                      | 0006111 // regulation of gluconeogenesis // inferred from mutant phenotype//0006810       |
| NM_0086      |         | 0.0202 |       |       | -1.08  | 1.02   | 1.06   | 1.04   | <i>Nedd1</i>                                  | neural precursor cell expressed, developmentally down-regulated gene 1                   | 0007019 // microtubule depolymerization // not recorded//0007049 // cell cycle // infer   |
| NM_1723      |         | 0.0496 |       |       | 1.16   | 1.38   | 1.06   | 1.05   | <i>Limd2</i>                                  | LIM domain containing 2                                                                  |                                                                                           |
| NM_0011      |         | 0.0297 |       |       | 1.08   | -1.08  | 1.06   | 1.24   | <i>Vps26a</i>                                 | vacuolar protein sorting 26 homolog A (yeast)                                            | 0006810 // transport // inferred from electronic annotation//0006886 // intracellular pr  |
| NM_0012      |         | 0.041  |       |       | 1.25   | 1.06   | 1.06   | 1.10   | <i>Eps8l1</i>                                 | EPS8-like 1                                                                              | 0007266 // Rho protein signal transduction // not recorded//0016601 // Rac protein sig    |
| NM_008182    | //XM    | 0.0651 | 0.042 |       | 1.10   | 1.14   | 1.06   | 1.34   | <i>Gsta2</i> // <i>Gm3776</i> // <i>Gsta1</i> | glutathione S-transferase, alpha 2 (Yc2)//predicted gene 3776//glutathione S-transf      | 0006749 // glutathione metabolic process // inferred from sequence or structural similar  |
| NM_0011      |         | 0.0114 | 0.013 |       | -1.01  | 1.10   | 1.06   | 1.08   | <i>Tlk2</i>                                   | tousled-like kinase 2 (Arabidopsis)                                                      | 0001672 // regulation of chromatin assembly or disassembly // not recorded//0006468       |
| NM_0013      |         | 0.0147 |       |       | 1.04   | -1.03  | 1.06   | 1.14   | <i>Rnf10</i>                                  | ring finger protein 10                                                                   | 0006351 // transcription, DNA-templated // inferred from electronic annotation//00063     |
| NM_0011      |         | 0.038  |       |       | 1.07   | -1.07  | 1.06   | 1.03   | <i>Rnmt</i>                                   | RNA (guanine-7) methyltransferase                                                        | 0006370 // 7-methylguanosine mRNA capping // not recorded//0006397 // mRNA proc           |
| NM_001290486 | //      | 0.007  |       |       | -1.13  | -1.21  | 1.06   | -1.06  | <i>Lpar1</i>                                  | lysophosphatidic acid receptor 1                                                         | 0000187 // activation of MAPK activity // inferred from direct assay//0007165 // signal t |
| NM_0090      |         | 0.0011 |       |       | 1.10   | 1.40   | 1.06   | 1.08   | <i>Rasa3</i>                                  | RAS p21 protein activator 3                                                              | 0007165 // signal transduction // inferred from electronic annotation//0034605 // cellu   |
| NM_0011      |         | 0.0061 |       |       | 1.02   | -1.30  | 1.06   | -1.04  | <i>Snrk</i>                                   | SNF related kinase                                                                       | 0006468 // protein phosphorylation // not recorded//0016310 // phosphorylation // inf     |
| NM_145705    | //XM    |        | 0.02  |       | 1.16   | 1.15   | 1.06   | -1.01  | <i>Tinfr</i>                                  | Terf1 (TRF1)-interacting nuclear factor 2                                                | 0010833 // telomere maintenance via telomere lengthening // not recorded//0010836 /       |
| NM_011163    | //XM    |        | 0.011 |       | -1.02  | 1.06   | 1.06   | 1.02   | <i>Eif2ak2</i>                                | eukaryotic translation initiation factor 2-alpha kinase 2                                | 0000186 // activation of MAPK activity // not recorded//0001819 // positive regulatio     |
| NM_0296      |         | 0.0113 |       |       | 1.02   | 1.15   | 1.06   | -1.03  | <i>Srxn1</i>                                  | sulfiredoxin 1 homolog (S. cerevisiae)                                                   | 0006979 // response to oxidative stress // inferred from direct assay//0006979 // respo   |
| NM_001081183 | //      | 0.038  |       |       | -1.05  | -1.00  | 1.06   | 1.05   | <i>110037F02Rik</i>                           | RIKEN cDNA 110037F02 gene                                                                | 0006397 // mRNA processing // inferred from electronic annotation//0008380 // RNA s       |

| RefSeq                | Tri.p  | 24h   | p     | 48h   | p     | 72h                                      | FD Air                                                                                 | FD 24h                                     | FD 48h                                                                            | FD 72h                                                      | Gene Symbol                     | Gene Title | Gene Ontology Biological Process |
|-----------------------|--------|-------|-------|-------|-------|------------------------------------------|----------------------------------------------------------------------------------------|--------------------------------------------|-----------------------------------------------------------------------------------|-------------------------------------------------------------|---------------------------------|------------|----------------------------------|
| NM_177150//XM_006531  | 0.032  | -1.05 | 1.03  | 1.06  | 1.12  | <b>Cenpt</b>                             | centromere protein T                                                                   | 0000278                                    | // mitotic cell cycle // not recorded//0007049                                    | // cell cycle // inferred from elec                         |                                 |            |                                  |
| NM_001146100//NM_0101 | 0.014  | 1.05  | 1.10  | 1.06  | -1.03 | <b>Hk1//Gm10362//Rpl17//Rpl17-ps5//R</b> | hexokinase 1//predicted gene 10362//ribosomal protein L17//ribosomal protein L1        | 0001678                                    | // cellular glucose homeostasis // not recorded//0002931                          | // response to ischer                                       |                                 |            |                                  |
| NM_0010               | 0.0256 | 1.02  | -1.13 | 1.06  | 1.26  | <b>C1s1</b>                              | complement component 1, s subcomponent 1                                               | 0002375                                    | // immune system process // inferred from electronic annotation//0006508          | //                                                          |                                 |            |                                  |
| NM_144543//XM_0022    |        | -1.02 | 1.02  | 1.06  | 1.02  | <b>Thyn1</b>                             | thymocyte nuclear protein 1                                                            |                                            |                                                                                   |                                                             |                                 |            |                                  |
| NM_0216               | 0.0051 | 1.11  | 1.01  | 1.06  | 1.10  | <b>Agrn</b>                              | agrin                                                                                  | 0001932                                    | // regulation of protein phosphorylation // not recorded//0001934                 | // positive i                                               |                                 |            |                                  |
| NM_0010               | 0.0283 | -1.01 | 1.13  | 1.06  | 1.08  | <b>Mtmr7</b>                             | myotubularin related protein 7                                                         | 0006470                                    | // protein dephosphorylation // inferred from electronic annotation//0016311      |                                                             |                                 |            |                                  |
| NM_001201413//        | 0.02   | -1.09 | -1.15 | 1.06  | -1.10 | <b>Apb2</b>                              | amyloid beta (A4) precursor protein-binding, family B, member 2                        | 0001764                                    | // neuron migration // inferred from genetic interaction//0006355                 | // regulatio                                                |                                 |            |                                  |
| NM_0102               | 0.0274 | 1.06  | -1.04 | 1.06  | 1.02  | <b>Gdap2</b>                             | ganglioside-induced differentiation-associated-protein 2                               | 0032526                                    | // response to retinoic acid // inferred from direct assay                        |                                                             |                                 |            |                                  |
| NM_0012               | 0.0478 | -1.02 | 1.22  | 1.06  | 1.10  | <b>Rgs19</b>                             | regulator of G-protein signaling 19                                                    | 0009968                                    | // negative regulation of signal transduction // inferred from electronic annotat |                                                             |                                 |            |                                  |
| NM_145600             |        | 0.023 | -1.04 | 1.03  | 1.06  | <b>Zfp330</b>                            | zinc finger protein 330                                                                |                                            |                                                                                   |                                                             |                                 |            |                                  |
| NM_0012               | 0.0207 | -1.03 | -1.21 | 1.06  | 1.15  | <b>Spin1</b>                             | spindlin 1                                                                             | 0007049                                    | // cell cycle // inferred from electronic annotation//0007143                     | // female meiotic                                           |                                 |            |                                  |
| NM_0011               | 0.0146 | 1.03  | -1.08 | 1.06  | 1.00  | <b>Pdik1</b>                             | PDLIM1 interacting kinase 1 like                                                       | 0006468                                    | // protein phosphorylation // inferred from electronic annotation//0016310        | //                                                          |                                 |            |                                  |
| NM_0271               | 0.0041 | 1.07  | 1.41  | 1.06  | 1.06  | <b>Dph1//Ovca2</b>                       | DPH1 homolog (S. cerevisiae)//candidate tumor suppressor in ovarian cancer 2           | 0008283                                    | // cell proliferation // inferred from mutant phenotype//0017183                  | // peptidyl-d                                               |                                 |            |                                  |
| NM_0187               | 0.0196 | 1.00  | 1.18  | 1.06  | 1.28  | <b>Eif3d</b>                             | eukaryotic translation initiation factor 3, subunit D                                  | 0001731                                    | // formation of translation preinitiation complex // inferred from electronic ann |                                                             |                                 |            |                                  |
| NM_013691//XM_006501  | 0.022  | -1.23 | -1.13 | 1.06  | 1.05  | <b>Thbs3</b>                             | thrombospondin 3                                                                       | 0003417                                    | // growth plate cartilage development // inferred from genetic interaction//00    |                                                             |                                 |            |                                  |
| NM_001305273//        | 0.015  | -1.03 | 1.02  | 1.06  | 1.02  | <b>Rngtt</b>                             | RNA guanylyltransferase and 5'-phosphatase                                             | 0006370                                    | // 7-methylguanosine mRNA capping // not recorded//0006396                        | // RNA proces                                               |                                 |            |                                  |
| NM_0010               | 0.0135 | 1.11  | -1.35 | 1.06  | 1.25  | <b>Fam117b</b>                           | family with sequence similarity 117, member B                                          |                                            |                                                                                   |                                                             |                                 |            |                                  |
| NM_0263               | 0.0119 | 1.02  | -1.06 | 1.06  | -1.12 | <b>Tprgl</b>                             | transformation related protein 63 regulated like                                       |                                            |                                                                                   |                                                             |                                 |            |                                  |
| NM_009252//XM_011244  | 0.03   | -1.20 | -1.02 | 1.06  | 1.25  | <b>Serpina3n</b>                         | serine (or cysteine) peptidase inhibitor, clade A, member 3N                           | 0006953                                    | // acute-phase response // inferred from electronic annotation//0010466           | // ne                                                       |                                 |            |                                  |
| NM_00084              | 0.0037 | -1.16 | 1.52  | 1.06  | -1.04 | <b>Irgb2</b>                             | integrin beta 2                                                                        | 0002523                                    | // leukocyte migration involved in inflammatory response // not recorded//000     |                                                             |                                 |            |                                  |
| NM_0012               | 0.0154 | 1.06  | -1.09 | 1.06  | 1.03  | <b>Trim2</b>                             | tripartite motif-containing 2                                                          | 0016567                                    | // protein ubiquitination // inferred from electronic annotation//0016567         | // pr                                                       |                                 |            |                                  |
| NM_0011               | 0.0358 | -1.09 | 1.05  | 1.06  | 1.15  | <b>Srp54a//Srp54b//Srp54c</b>            | signal recognition particle 54A//signal recognition particle 54B//signal recognition p | 0006614                                    | // SRP-dependent cotranslational protein targeting to membrane // not recorde     |                                                             |                                 |            |                                  |
| NM_175313//XM_006501  | 0.034  | -1.06 | -1.04 | 1.07  | 1.15  | <b>Eogt</b>                              | EGF domain-specific O-linked N-acetylglucosamine (GlcNAc) transferase                  | 0006493                                    | // protein O-linked glycosylation // inferred from direct assay//0008152          | // met                                                      |                                 |            |                                  |
| NM_0094               | 0.0013 | ##### | -1.14 | 1.03  | 1.07  | <b>Tuba3a//Tuba3b</b>                    | tubulin, alpha 3A//tubulin, alpha 3B                                                   | 0007017                                    | // microtubule-based process // inferred from electronic annotation//0008152      |                                                             |                                 |            |                                  |
| NM_001146174//        | 0.047  | 0.021 | -1.09 | -1.05 | 1.07  | <b>Rangap1</b>                           | RAN GTPase activating protein 1                                                        | 0007165                                    | // signal transduction // inferred from electronic annotation//0043547            | // posit                                                    |                                 |            |                                  |
| NM_0010               | 0.007  | -1.07 | -1.33 | 1.07  | 1.03  | <b>Cstf3</b>                             | cleavage stimulation factor, 3' pre-RNA, subunit 3                                     | 0006379                                    | // mRNA cleavage // not recorded//0006396                                         | // RNA processing // inferred fror                          |                                 |            |                                  |
| NM_0116               | 0.0239 | -1.00 | 1.24  | 1.07  | -1.21 | <b>Vars</b>                              | valyl-tRNA synthetase                                                                  | 0006412                                    | // translation // inferred from electronic annotation//0006418                    | // tRNA aminoa                                              |                                 |            |                                  |
| NM_0010               | 0.0058 | -1.03 | 1.09  | 1.07  | 1.01  | <b>Ckif</b>                              | chemokine-like factor                                                                  | 0006935                                    | // chemotaxis // inferred from electronic annotation//0008283                     | // cell prolifera                                           |                                 |            |                                  |
| NM_001042593//NM_00   | 0.021  | -1.06 | -1.12 | 1.07  | 1.03  | <b>Hbs1</b>                              | Hbs1-like (S. cerevisiae)                                                              | 0006412                                    | // translation // inferred from electronic annotation//0006414                    | // translational                                            |                                 |            |                                  |
| NM_001277273//        | 0.048  | -1.04 | 1.09  | 1.07  | -1.08 | <b>Fancl</b>                             | Fanconi anemia, complementation group L                                                | 0002230                                    | // positive regulation of defense response to virus by host // not recorded//00   |                                                             |                                 |            |                                  |
| NM_016866//XM_0021    | 0.021  | -1.03 | -1.05 | 1.07  | 1.03  | <b>Stk39</b>                             | serine/threonine kinase 39                                                             | 0001933                                    | // negative regulation of protein phosphorylation // inferred from direct assay// |                                                             |                                 |            |                                  |
| NM_0110               | 0.0011 | 1.26  | -1.30 | 1.07  | 1.47  | <b>Per2</b>                              | period circadian clock 2                                                               | 0000122                                    | // negative regulation of transcription from RNA polymerase II promoter // infer  |                                                             |                                 |            |                                  |
| NM_0103               | 0.0018 | -1.08 | 1.29  | 1.07  | 1.10  | <b>Gsr</b>                               | glutathione reductase                                                                  | 0006749                                    | // glutathione metabolic process // inferred by curator//0006749                  | // glutathion                                               |                                 |            |                                  |
| NM_001256516//        | 0.012  | -1.04 | -1.09 | 1.07  | -1.01 | <b>Zfp672</b>                            | zinc finger protein 672                                                                | 0006351                                    | // transcription, DNA-templated // inferred from electronic annotation//000063    |                                                             |                                 |            |                                  |
| NM_0010               | 0.0099 | 1.05  | -1.06 | 1.07  | 1.00  | <b>Akirin2</b>                           | akirin 2                                                                               | 0000122                                    | // negative regulation of transcription from RNA polymerase II promoter // not i  |                                                             |                                 |            |                                  |
| NM_0095               | 0.0409 | -1.02 | 1.13  | 1.07  | 1.02  | <b>Vhl</b>                               | von Hippel-Lindau tumor suppressor                                                     | 0000122                                    | // negative regulation of transcription from RNA polymerase II promoter // not i  |                                                             |                                 |            |                                  |
| NM_025338//XM_006531  | 0.023  | 1.12  | 1.13  | 1.07  | -1.03 | <b>Aurkaip1</b>                          | aurora kinase A interacting protein 1                                                  | 0016310                                    | // phosphorylation // inferred from electronic annotation//0016567                | // protein                                                  |                                 |            |                                  |
| NM_0157               | 0.047  | 1.10  | -1.19 | 1.07  | 1.03  | <b>Tpa</b>                               | tocopherol (alpha) transfer protein                                                    | 0001890                                    | // placenta development // inferred from mutant phenotype//0001892                | // emb                                                      |                                 |            |                                  |
| NM_0010               | 0.0036 | 1.03  | 1.34  | 1.07  | -1.09 | <b>Gmfg</b>                              | glia maturation factor, gamma                                                          | 0034316                                    | // negative regulation of Arp2/3 complex-mediated actin nucleation // inferred    |                                                             |                                 |            |                                  |
| NM_0011               | 0.0018 | 0.002 | -1.00 | 1.14  | 1.07  | <b>Nt5c2</b>                             | 5'-nucleotidase, cytosolic II                                                          | 0006470                                    | // protein dephosphorylation // --//0006470                                       | // protein dephosphorylation // i                           |                                 |            |                                  |
| NM_1339               | 0.0247 | -1.09 | 1.14  | 1.07  | -1.06 | <b>Emilin1</b>                           | elastin microfibril interfacer 1                                                       | 0007155                                    | // cell adhesion // inferred from electronic annotation//0010811                  | // positive reg                                             |                                 |            |                                  |
| NM_026177             | 0.017  | -1.04 | 1.01  | 1.07  | 1.04  | <b>Gpalpp1</b>                           | GPALPP motifs containing 1                                                             |                                            |                                                                                   |                                                             |                                 |            |                                  |
| NM_0273               | #####  | -1.00 | 1.21  | 1.07  | 1.05  | <b>Gorasp2</b>                           | golgi reassembly stacking protein 2                                                    | 0006996                                    | // organelle organization // not recorded//0007030                                | // Golgi organization // no                                 |                                 |            |                                  |
| NM_1339               | 0.0149 | 1.07  | -1.16 | 1.07  | 1.12  | <b>Mlxip</b>                             | MLX interacting protein                                                                | 0006351                                    | // transcription, DNA-templated // inferred from electronic annotation//00063     |                                                             |                                 |            |                                  |
| NM_0187               | 0.0384 | 1.03  | 1.22  | 1.07  | -1.18 | <b>Gipc1</b>                             | GIPC PDZ domain containing family, member 1                                            | 0006605                                    | // protein targeting // inferred from mutant phenotype//0006605                   | // protein ta                                               |                                 |            |                                  |
| NM_001288578//NM_00   | 0.031  | -1.04 | -1.11 | 1.07  | 1.09  | <b>Adh5</b>                              | alcohol dehydrogenase 5 (class III), chi polypeptide                                   | 0001523                                    | // retinoid metabolic process // inferred from mutant phenotype//0003016          | //                                                          |                                 |            |                                  |
| NM_0011               | 0.0271 | 1.04  | -1.21 | 1.07  | 1.13  | <b>Gtf3c4</b>                            | general transcription factor IIIC, polypeptide 4                                       | 0006351                                    | // transcription, DNA-templated // inferred from electronic annotation//00165     |                                                             |                                 |            |                                  |
| NM_001032413//NM_00   | 0.047  | 1.14  | 1.08  | 1.07  | -1.03 | <b>Pear1</b>                             | platelet endothelial aggregation receptor 1                                            | 0043654                                    | // recognition of apoptotic cell // inferred from direct assay//0043654           | // recog                                                    |                                 |            |                                  |
| NM_0307               | 0.0396 | 0.049 | -1.10 | 1.11  | 1.07  | -1.12                                    | <b>Lactb</b>                                                                           | lactamase, beta                            | 0008152                                                                           | // metabolic process // inferred from electronic annotation |                                 |            |                                  |
| NM_0288               | #####  | -1.03 | 1.19  | 1.07  | 1.02  | <b>Arpc5l</b>                            | actin related protein 2/3 complex, subunit 5-like                                      | 0030833                                    | // regulation of actin filament polymerization // inferred from electronic annota |                                                             |                                 |            |                                  |
| NM_0010               | 0.0207 | -1.05 | 1.07  | 1.07  | 1.19  | <b>Furin</b>                             | furin (paired basic amino acid cleaving enzyme)                                        | 0006465                                    | // signal peptide processing // not recorded//0006508                             | // proteolysis // inferre                                   |                                 |            |                                  |
| NM_0010               | 0.0015 | 0.002 | -1.05 | 1.04  | 1.07  | -1.04                                    | <b>Ogfrl1</b>                                                                          | opioid growth factor receptor-like 1       |                                                                                   |                                                             |                                 |            |                                  |
| NM_0010               | 0.0255 | -1.06 | 1.17  | 1.07  | 1.21  | <b>H3f3a-ps1//H3f3b//H3f3c</b>           | H3 histone, family 3A//H3 histone, family 3A, pseudogene 1//H3 histone, family 3B//    | 0000183                                    | // chromatin silencing at rDNA // traceable author statement//0001649             | // oste                                                     |                                 |            |                                  |
| NM_010162             | 0.041  | -1.09 | -1.13 | 1.07  | 1.11  | <b>Ext1</b>                              | exostoses (multiple) 1                                                                 | 0001503                                    | // ossification // not recorded//0006024                                          | // glycosaminoglycan biosynthetic prc                       |                                 |            |                                  |
| NM_0076               | #####  | -1.05 | -1.47 | 1.07  | -1.18 | <b>Cdr2</b>                              | cerebellar degeneration-related 2                                                      |                                            |                                                                                   |                                                             |                                 |            |                                  |
| NM_1813               | 0.0163 | 1.03  | -1.03 | 1.07  | 1.02  | <b>Anapc13</b>                           | anaphase promoting complex subunit 13                                                  | 0007049                                    | // cell cycle // inferred from electronic annotation//0007067                     | // mitotic nuclear                                          |                                 |            |                                  |
| NM_0213               | 0.0091 | -1.07 | 1.09  | 1.07  | -1.10 | <b>Itgax</b>                             | integrin alpha X                                                                       | 0007155                                    | // cell adhesion // inferred from electronic annotation//0007229                  | // integrin-mu                                              |                                 |            |                                  |
| NM_0012               | 0.0439 | 0.023 | -1.01 | 1.15  | 1.07  | -1.03                                    | <b>Nfam1</b>                                                                           | Nfat activating molecule with ITAM motif 1 | 0007165                                                                           | // signal transduction // not recorded//0007165             | // signal transduction // infer |            |                                  |
| NM_0119               | 0.0407 | 1.13  | -1.00 | 1.07  | 1.21  | <b>Mapk3</b>                             | mitogen-activated protein kinase 3                                                     | 0000165                                    | // MAPK cascade // not recorded//0000189                                          | // MAPK import into nucleus // no                           |                                 |            |                                  |
| NM_1724               | 0.0147 | 1.10  | -1.01 | 1.07  | 1.12  | <b>Dnajc8</b>                            | Dnaj (Hsp40) homolog, subfamily C, member 8                                            |                                            |                                                                                   |                                                             |                                 |            |                                  |
| NM_025934//XM_006524  | 0.05   | -1.03 | 1.00  | 1.07  | 1.22  | <b>Riok2</b>                             | RIO kinase 2 (yeast)                                                                   | 0006468                                    | // protein phosphorylation // inferred from electronic annotation//0016310        | //                                                          |                                 |            |                                  |
| NM_177326//XM_006524  | 0.01   | -1.03 | -1.05 | 1.07  | 1.07  | <b>Pak2</b>                              | p21 protein (Cdc42/Rac)-activated kinase 2                                             | 0006468                                    | // protein phosphorylation // not recorded//0006915                               | // apoptotic process // ir                                  |                                 |            |                                  |
| NM_0330               | #####  | 1.05  | 1.19  | 1.07  | -1.06 | <b>Nudt19</b>                            | nudix (nucleoside diphosphate linked moiety X)-type motif 19                           | 0008152                                    | // metabolic process // inferred from electronic annotation                       |                                                             |                                 |            |                                  |
| NM_029896//XM_011244  | 0.034  | -1.08 | -1.11 | 1.07  | 1.05  | <b>Wdr82</b>                             | WD repeat domain containing 82                                                         | 0051568                                    | // histone H3-K4 methylation // inferred from mutant phenotype//0051568           | //                                                          |                                 |            |                                  |

| RefSeq       | Tri          | p 24h | p 48h | p 72h | FD Air | FD 24h | FD 48h | FD 72h | Gene Symbol            | Gene Title                                                           | Gene Ontology Biological Process                                                          |
|--------------|--------------|-------|-------|-------|--------|--------|--------|--------|------------------------|----------------------------------------------------------------------|-------------------------------------------------------------------------------------------|
| NM_0205      | 0.0303       |       |       |       | -1.04  | 1.15   | 1.07   | 1.16   | <i>Nelfcd</i>          | negative elongation factor complex member C/D, Th1                   | 0006351 // transcription, DNA-templated // inferred from electronic annotation//00063     |
| NM_1774      | 0.0337       |       |       |       | -1.05  | 1.06   | 1.08   | 1.09   | <i>Pum3</i>            | pumilio RNA-binding family member 3                                  | 0006417 // regulation of translation // not recorded                                      |
| NM_0011      | 0.0385       |       |       |       | 1.16   | 1.33   | 1.08   | 1.10   | <i>Pkn1</i>            | protein kinase N1                                                    | 0001782 // B cell homeostasis // inferred from mutant phenotype//0001783 // B cell ap     |
| NM_0078      | 0.0077       |       |       |       | 1.14   | -1.03  | 1.08   | 1.05   | <i>Dsg2</i>            | desmoglein 2                                                         | 0002934 // desmosome organization // not recorded//0003165 // Purkinje myocyte dev        |
| NM_0010      | 0.0486       |       | 0.034 |       | -1.08  | 1.13   | 1.08   | 1.33   | <i>Rrn3</i>            | RRN3 RNA polymerase I transcription factor homolog (yeast)           | 0001701 // in utero embryonic development // inferred from mutant phenotype//0006:        |
| NM_1448      | 0.0174       |       |       |       | 1.09   | -1.05  | 1.08   | 1.07   | <i>Taok1</i>           | TAO kinase 1                                                         | 0000165 // MAPK cascade // --//0000186 // activation of MAPKK activity // not recorde     |
| NM_0115      | 0.0494       |       |       |       | 1.08   | 1.02   | 1.08   | 1.13   | <i>Timp2</i>           | tissue inhibitor of metalloproteinase 2                              | 0007417 // central nervous system development // inferred from electronic annotation//    |
| NM_1705      | 0.0451       |       |       |       | -1.06  | -1.26  | 1.08   | 1.01   | <i>Nup1</i>            | nucleoporin like 1                                                   | 0006810 // transport // inferred from electronic annotation//0006913 // nucleocytopla:    |
| NM_025334    |              |       | 0.044 |       | -1.02  | -1.02  | 1.08   | 1.17   | <i>Txndc12</i>         | thioredoxin domain containing 12 (endoplasmic reticulum)             | 0045454 // cell redox homeostasis // inferred from electronic annotation//0055114 // o    |
| NM_0075      | 0.0327       |       |       |       | 1.02   | 1.11   | 1.08   | 1.03   | <i>Atp6v1b2</i>        | ATPase, H+ transporting, lysosomal V1 subunit B2                     | 0006810 // transport // inferred from electronic annotation//0006811 // ion transport /   |
| NM_0011      | 0.0223       |       |       |       | -1.01  | 1.25   | 1.08   | 1.09   | <i>Sirpa</i>           | signal-regulatory protein alpha                                      | 0002244 // hematopoietic progenitor cell differentiation // inferred from mutant phenot   |
| NM_0117      | 0.0042       |       |       |       | 1.03   | 1.46   | 1.08   | 1.13   | <i>Zfp36</i>           | zinc finger protein 36                                               | 0000122 // negative regulation of transcription from RNA polymerase II promoter // infer  |
| NM_0268      | 0.0146       |       | 0.018 |       | -1.02  | -1.29  | 1.08   | 1.03   | <i>Trmt1</i>           | tRNA methyltransferase 1 like                                        | 0002940 // tRNA N2-guanine methylation // --//0007610 // behavior // inferred from e      |
| NM_0012      | 0.0172       |       |       |       | -1.01  | 1.18   | 1.08   | 1.23   | <i>Tmem173</i>         | transmembrane protein 173                                            | 0002218 // activation of innate immune response // inferred from mutant phenotype//000    |
| NM_001044386 | ///NM_01     | 0.034 |       |       | 1.01   | -1.15  | 1.08   | 1.20   | <i>Zfx</i>             | zinc finger protein X-linked                                         | 0001541 // ovarian follicle development // inferred from mutant phenotype//0006351 /      |
| NM_0215      | 0.0131       |       |       |       | -1.07  | 1.19   | 1.08   | -1.01  | <i>Rcl1</i>            | RNA terminal phosphate cyclase-like 1                                | 0000479 // endonucleolytic cleavage of tricistronic rRNA transcript (5S-U-rRNA, 5.8S rRNA |
| NM_1386      | 0.0331       |       |       |       | -1.05  | 1.09   | 1.08   | 1.02   | <i>Mvd</i>             | mevalonate (diphospho) decarboxylase                                 | 0006629 // lipid metabolic process // inferred from electronic annotation//0006694 // s   |
| NM_172015    | ///XM        | 0.033 |       |       | -1.09  | -1.05  | 1.08   | 1.02   | <i>Iars</i>            | isoleucine-tRNA synthetase                                           | 0001649 // osteoblast differentiation // not recorded//0006412 // translation // inferre  |
| NM_0010      | 0.017        |       |       |       | 1.02   | -1.09  | 1.08   | 1.05   | <i>Osbp</i>            | oxysterol binding protein                                            | 0006810 // transport // inferred from electronic annotation//0006869 // lipid transport   |
| NM_0199      | 0.0242       |       |       |       | -1.11  | 1.14   | 1.08   | 1.05   | <i>Litaf</i> ///Gm9861 | LPS-induced TN factor//predicted gene 9861                           | 0001817 // regulation of cytokine production // inferred from mutant phenotype//0006      |
| NM_028680    |              |       | 0.013 |       | -1.10  | -1.07  | 1.08   | -1.14  | <i>Ift57</i>           | intraflagellar transport 57                                          | 0001843 // neural tube closure // inferred from mutant phenotype//0001947 // heart lc     |
| NM_1750      | 0.0085       |       |       |       | -1.01  | 1.10   | 1.08   | 1.20   | <i>Commd2</i>          | COMM domain containing 2                                             | 0006351 // transcription, DNA-templated // inferred from electronic annotation//00063     |
| NM_0011      | 0.0262       |       | 0.023 |       | -1.19  | -1.02  | 1.08   | -1.01  | <i>Ccdc127</i>         | coiled-coil domain containing 127                                    |                                                                                           |
| NM_0084      | 0.0162       |       |       |       | -1.05  | 1.14   | 1.08   | -1.02  | <i>Irgb1bp1</i>        | integrin beta 1 binding protein 1                                    | 0001525 // angiogenesis // inferred from electronic annotation//0002043 // blood vess     |
| NM_0013      | 0.0058       |       |       |       | 1.02   | 1.29   | 1.08   | 1.06   | <i>Usp3</i>            | ubiquitin specific peptidase 3                                       | 0000122 // negative regulation of transcription from RNA polymerase II promoter // infer  |
| NM_025692    | ///XM        | 0.034 |       |       | -1.07  | 1.01   | 1.08   | -1.20  | <i>Uba5</i>            | ubiquitin-like modifier activating enzyme 5                          | 0033146 // regulation of intracellular estrogen receptor signaling pathway // not recorde |
| NM_0098      | 0.0245       |       |       |       | -1.04  | -1.20  | 1.08   | -1.07  | <i>Cebpg</i>           | CCAAT/enhancer binding protein (C/EBP), gamma                        | 0001889 // liver development // inferred from sequence or structural similarity//000188   |
| NM_001316372 | ///          | 0.028 |       |       | -1.04  | 1.06   | 1.08   | 1.07   | <i>Pcpt</i>            | phosphatidylcholine transfer protein                                 | 0006810 // transport // inferred from electronic annotation//0006869 // lipid transport   |
| NM_013717    | ///XM        | 0.035 |       |       | -1.01  | 1.03   | 1.08   | 1.02   | <i>B9d1</i>            | B9 protein domain 1                                                  | 0001701 // in utero embryonic development // inferred from mutant phenotype//00018        |
| NM_019951    |              |       | 0.037 |       | -1.09  | 1.03   | 1.08   | 1.21   | <i>Sec11a</i>          | SEC11 homolog A, signal peptidase complex subunit                    | 0006465 // signal peptide processing // inferred from electronic annotation//0006508 //   |
| NM_1462      | 0.0327       |       |       |       | -1.04  | 1.12   | 1.08   | 1.05   | <i>Apeh</i>            | acylpeptide hydrolase                                                | 0006508 // proteolysis // not recorded//0050435 // beta-amyloid metabolic process // r    |
| NM_001110310 | ///          | 0.015 |       |       | -1.04  | 1.03   | 1.08   | 1.06   | <i>Snx12</i>           | sorting nexin 12                                                     | 0006810 // transport // inferred from electronic annotation//0006897 // endocytosis //    |
| NM_0116      | 0.0116       | 0.043 |       |       | -1.19  | 1.11   | 1.08   | 1.17   | <i>Tubb5</i>           | tubulin, beta 5 class I                                              | 0006457 // protein folding // traceable author statement//0007017 // microtubule-base     |
| NM_019791    |              | 0.012 |       |       | -1.20  | -1.04  | 1.08   | 1.12   | <i>Maged1</i>          | melanoma antigen, family D, 1                                        | 0006357 // regulation of transcription from RNA polymerase II promoter // inferred from   |
| NM_001253757 | ///NM_00     | 0.034 |       |       | 1.00   | 1.00   | 1.08   | 1.33   | <i>Anp32e</i>          | acidic (leucine-rich) nuclear phosphoprotein 32 family, member E     | 0001658 // chromatin modification // inferred from electronic annotation//0043086 // r    |
| NM_001164223 | ///NM_02     | 0.045 |       |       | 1.06   | 1.01   | 1.08   | -1.02  | <i>Rpa1</i>            | replication protein A1                                               | 0000723 // telomere maintenance // not recorded//0000724 // double-strand break re        |
| NM_001289621 | ///          | 0.015 |       |       | -1.01  | 1.03   | 1.08   | 1.05   | <i>Mynn</i>            | myoneurin                                                            | 0006351 // transcription, DNA-templated // inferred from electronic annotation//00063     |
| NM_029735    | ///XM        | 0.003 |       |       | -1.09  | -1.01  | 1.08   | 1.03   | <i>Eprs</i>            | glutamyl-prolyl-tRNA synthetase                                      | 0006412 // translation // inferred from electronic annotation//0006417 // regulation of   |
| NM_0206      | 0.0259       |       |       |       | 1.05   | 1.15   | 1.08   | 1.00   | <i>Srd5a3</i>          | steroid 5 alpha-reductase 3                                          | 0006486 // protein glycosylation // inferred from electronic annotation//0006488 // dol   |
| NM_0137      | #####        | 0.044 |       |       | -1.13  | 1.39   | 1.08   | 1.16   | <i>Msrb1</i>           | methionine sulfoxide reductase B1                                    | 0002376 // immune system process // inferred from electronic annotation//0006979 //       |
| NM_033526    | ///XM        | 0.02  |       |       | -1.05  | -1.07  | 1.08   | 1.05   | <i>Ubqln4</i>          | ubiquilin 4                                                          | 0006914 // autophagy // inferred from electronic annotation//0032434 // regulation of     |
| NM_0011      | 0.0299       |       |       |       | 1.09   | 1.29   | 1.08   | 1.00   | <i>Sin3b</i>           | transcriptional regulator, SIN3B (yeast)                             | 0000122 // negative regulation of transcription from RNA polymerase II promoter // not r  |
| NM_0117      | 0.0233       |       |       |       | -1.06  | 1.12   | 1.08   | 1.04   | <i>Trpv2</i>           | transient receptor potential cation channel, subfamily V, member 2   | 0006810 // transport // inferred from electronic annotation//0006811 // ion transport /   |
| NM_019743    |              | 0.024 |       |       | -1.01  | 1.06   | 1.08   | -1.03  | <i>Rybp</i>            | RING1 and YY1 binding protein                                        | 0000122 // negative regulation of transcription from RNA polymerase II promoter // infer  |
| NM_0011      | 0.0292       |       |       |       | 1.01   | 1.16   | 1.08   | -1.10  | <i>Ifnar2</i>          | interferon (alpha and beta) receptor 2                               | 0006357 // regulation of transcription from RNA polymerase II promoter // inferred from   |
| NM_001161775 | ///NM_01     | 0.04  |       |       | -1.21  | -1.21  | 1.08   | 1.17   | <i>Myh11</i>           | myosin, heavy polypeptide 11, smooth muscle                          | 0006939 // smooth muscle contraction // inferred from direct assay//0006939 // smoot      |
| NM_009068    | ///XM        | 0.033 |       |       | -1.03  | -1.01  | 1.08   | -1.05  | <i>Ripk1</i>           | receptor (TNFRSF)-interacting serine-threonine kinase 1              | 0001934 // positive regulation of protein phosphorylation // not recorded//0006468 // i   |
| NM_1454      | 0.0221       |       |       |       | 1.00   | -1.08  | 1.08   | 1.05   | <i>Nipal2</i>          | NIPA-like domain containing 2                                        | 0015693 // magnesium ion transport // inferred from electronic annotation//1903830 //     |
| NM_0188      | 0.0061       |       |       |       | -1.03  | 1.05   | 1.08   | 1.06   | <i>Uqc1</i>            | ubiquinol-cytochrome c reductase complex assembly factor 1           | 0034551 // mitochondrial respiratory chain complex III assembly // not recorded//00070:   |
| NM_00229     | 0.0096       |       |       |       | -1.05  | 1.09   | 1.08   | 1.09   | <i>Nif3l1</i>          | Ngg1 interacting factor 3-like 1 (S. pombe)                          | 0030182 // neuron differentiation // inferred from mutant phenotype//0045893 // posi      |
| NM_0167      | 0.0287       |       |       |       | -1.13  | 1.18   | 1.09   | -1.02  | <i>Atp5b</i>           | ATP synthase, H+ transporting mitochondrial F1 complex, beta subunit | 0001525 // angiogenesis // not recorded//0001649 // osteoblast differentiation // not r   |
| NM_0012      | 0.0067       |       |       |       | 1.00   | 1.45   | 1.09   | -1.14  | <i>Ncf1</i>            | neutrophil cytosolic factor 1                                        | 0001878 // response to yeast // inferred from mutant phenotype//0001909 // leukocyte      |
| NM_012055    | ///XM        | 0.014 |       |       | -1.19  | -1.02  | 1.09   | -1.03  | <i>Asns</i>            | asparagine synthetase                                                | 0001889 // liver development // inferred from electronic annotation//0006520 // cellul    |
| NM_030109    | ///XM        | 0.038 |       |       | 1.00   | 1.03   | 1.09   | 1.21   | <i>Sf3b2</i>           | splicing factor 3b, subunit 2                                        | 0000398 // mRNA splicing, via spliceosome // not recorded                                 |
| NM_0224      | 0.0138       |       |       |       | 1.08   | 1.36   | 1.09   | 1.06   | <i>Ptges</i>           | prostaglandin E synthase                                             | 0001516 // prostaglandin biosynthetic process // not recorded//0002526 // acute inflan    |
| NM_133900    | ///XM_006504 | 0.023 |       |       | -1.08  | -1.01  | 1.09   | 1.09   | <i>Psph</i>            | phosphoserine phosphatase                                            | 0006470 // protein dephosphorylation // --//0006470 // protein dephosphorylation // i     |
| NM_001305284 | ///          | 0.05  |       |       | -1.18  | -1.28  | 1.09   | 1.06   | <i>Mpdz</i>            | multiple PDZ domain protein                                          | 0007155 // cell adhesion // inferred from direct assay//0042552 // myelination // not r   |
| NM_080850    | ///XM        | 0.007 |       |       | -1.06  | -1.00  | 1.09   | -1.16  | <i>Pask</i>            | PAS domain containing serine/threonine kinase                        | 0006468 // protein phosphorylation // not recorded//0016310 // phosphorylation // inf     |
| NM_0076      | 0.0021       |       |       |       | 1.13   | 2.89   | 1.09   | 1.11   | <i>Cd79a</i>           | CD79A antigen (immunoglobulin-associated alpha)                      | 0002250 // adaptive immune response // inferred from electronic annotation//0002376       |
| NM_011653    |              | 0.008 |       |       | -1.14  | -1.00  | 1.09   | -1.01  | <i>Tuba1a</i>          | tubulin, alpha 1A                                                    | 0007017 // microtubule-based process // inferred from electronic annotation//0008152      |
| NM_001110512 | ///NM_14     | 0.02  |       |       | 1.04   | 1.09   | 1.09   | 1.18   | <i>Mettl8</i>          | methyltransferase like 8                                             | 0007519 // skeletal muscle tissue development // inferred from direct assay//0016573 /    |
| NM_0119      | 0.0232       |       |       |       | 1.07   | -1.07  | 1.09   | 1.22   | <i>Fto</i>             | fat mass and obesity associated                                      | 0001659 // temperature homeostasis // inferred from mutant phenotype//0006281 // C        |
| NM_0082      | 0.0037       |       |       |       | 1.02   | 1.54   | 1.09   | -1.30  | <i>Hlx</i>             | H2.0-like homeobox                                                   | 0001889 // liver development // inferred from mutant phenotype//0006351 // transcrip      |
| NM_0265      | 0.0246       |       |       |       | -1.03  | 1.18   | 1.09   | 1.10   | <i>Emc4</i>            | ER membrane protein complex subunit 4                                | 0006915 // apoptotic process // inferred from electronic annotation                       |

| RefSeq       | Tri          | p 24h | p 48h | p 72h | FD Air | FD 24h | FD 48h | FD 72h | Gene Symbol                                                           | Gene Title                                                                                 | Gene Ontology Biological Process                                                            |
|--------------|--------------|-------|-------|-------|--------|--------|--------|--------|-----------------------------------------------------------------------|--------------------------------------------------------------------------------------------|---------------------------------------------------------------------------------------------|
| NM_1338      | 0.0074       |       |       |       | -1.07  | 1.11   | 1.09   | -1.11  | <i>Dpp3</i>                                                           | dipeptidylpeptidase 3                                                                      | 0006508 // proteolysis // not recorded                                                      |
| NM_001290826 | ///NM_001    | 0.012 |       |       | -1.04  | 1.04   | 1.09   | 1.14   | <i>Cpeb3</i>                                                          | cytoplasmic polyadenylation element binding protein 3                                      | 0000122 // negative regulation of transcription from RNA polymerase II promoter // not r    |
| NM_0092      | 0.034        | 0.007 |       |       | -1.08  | 1.05   | 1.09   | -1.05  | <i>Sos1</i>                                                           | son of sevenless homolog 1 (Drosophila)                                                    | 0001782 // B cell homeostasis // inferred from genetic interaction///0001942 // hair folli  |
| NM_0011      | 0.0452       |       |       |       | -1.05  | -1.15  | 1.09   | 1.04   | <i>2-Sep</i>                                                          | septin 2                                                                                   | 0000910 // cytokinesis // non-traceable author statement///0002036 // regulation of L-g     |
| NM_001163687 | ///          | 0.025 |       |       | -1.10  | -1.01  | 1.09   | -1.08  | <i>Naaa</i>                                                           | N-acyl ethanolamine acid amidase                                                           | 0006629 // lipid metabolic process // inferred from electronic annotation                   |
| NM_0013      | #####        |       |       |       | 1.09   | -1.01  | 1.09   | 1.02   | <i>Actg1</i>                                                          | actin, gamma, cytoplasmic 1                                                                | 0001895 // retina homeostasis // inferred from electronic annotation///0045214 // sarcc     |
| NM_019836    | ///XM        | 0.013 |       |       | 1.05   | 1.04   | 1.09   | -1.06  | <i>Noa1</i>                                                           | nitric oxide associated 1                                                                  | 0006915 // apoptotic process // inferred from electronic annotation///0010941 // regula     |
| NM_0087      | 0.0186       |       |       |       | 1.08   | 1.38   | 1.09   | 1.06   | <i>Pafah1b3</i>                                                       | platelet-activating factor acetylhydrolase, isoform 1b, subunit 3                          | 0006629 // lipid metabolic process // inferred from electronic annotation///0007283 // s    |
| NM_1451      | 0.0379       |       |       |       | 1.02   | 1.21   | 1.09   | 1.16   | <i>Eif3l</i>                                                          | eukaryotic translation initiation factor 3, subunit L                                      | 0001731 // formation of translation preinitiation complex // inferred from electronic ann   |
| NM_001110211 | ///          | 0.011 |       |       | -1.08  | 1.05   | 1.09   | 1.39   | <i>Anxa6</i>                                                          | annexin A6                                                                                 | 0006816 // calcium ion transport // inferred from mutant phenotype///0006937 // regul       |
| NM_025516    | ///XM        | 0.035 |       |       | -1.00  | -1.04  | 1.09   | 1.24   | <i>Ergic3</i>                                                         | ERGIC and golgi 3                                                                          | 0006810 // transport // inferred from electronic annotation///0006888 // ER to Golgi ves    |
| NM_199199    |              | 0.019 |       |       | -1.08  | 1.00   | 1.09   | -1.02  | <i>Tmem199</i>                                                        | transmembrane protein 199                                                                  |                                                                                             |
| NM_001306205 | ///NM_02     | 0.009 |       |       | 1.11   | 1.14   | 1.09   | -1.16  | <i>Mvk</i>                                                            | mevalonate kinase                                                                          | 0006629 // lipid metabolic process // inferred from electronic annotation///0006694 // s    |
| NM_0104      | 0.0164       |       |       |       | -1.10  | 1.39   | 1.09   | 1.26   | <i>Id2</i>                                                            | inhibitor of DNA binding 2                                                                 | 0000122 // negative regulation of transcription from RNA polymerase II promoter // infer    |
| NM_001291197 | ///NM_00     | 0.049 |       |       | -1.05  | -1.02  | 1.09   | 1.13   | <i>Tpd52l2</i>                                                        | tumor protein D52-like 2                                                                   |                                                                                             |
| NM_0136      | 0.0338       |       |       |       | 1.02   | 1.20   | 1.09   | -1.01  | <i>Odc1</i> /// <i>Gm9115</i>                                         | ornithine decarboxylase, structural 1///ornithine decarboxylase, structural 1 pseudoge     | 0001822 // kidney development // inferred from mutant phenotype///0006595 // polyar         |
| NM_011794    | ///XM        | 0.012 | 0.015 |       | -1.21  | -1.20  | 1.09   | 1.16   | <i>Bpnt1</i>                                                          | bisphosphate 3'-nucleotidase 1                                                             | 0006135 // nucleobase-containing compound metabolic process // not recorded///0006          |
| NM_0173      | 0.0181       |       |       |       | -1.02  | 1.15   | 1.09   | -1.15  | <i>Ostf1</i>                                                          | osteoclast stimulating factor 1                                                            |                                                                                             |
| NM_0011      | 0.0458       |       |       |       | 1.01   | -1.15  | 1.09   | 1.06   | <i>Zfp275</i>                                                         | zinc finger protein 275                                                                    | 0006355 // regulation of transcription, DNA-templated // inferred from electronic annotz    |
| NM_1308      | #####        |       |       |       | -1.01  | 1.18   | 1.09   | 1.04   | <i>Anp32b</i>                                                         | acidic (leucine-rich) nuclear phosphoprotein 32 family, member B                           | 0000082 // G1/S transition of mitotic cell cycle // not recorded///0001944 // vasculare     |
| NM_0013      | 0.0384       |       |       |       | -1.04  | 1.13   | 1.09   | -1.17  | <i>Mbd3</i>                                                           | methyl-CpG binding domain protein 3                                                        | 0000122 // negative regulation of transcription from RNA polymerase II promoter // infer    |
| NM_009148    | ///XM        | 0.012 | 0.046 |       | -1.09  | -1.06  | 1.09   | 1.01   | <i>Exoc4</i>                                                          | exocyst complex component 4                                                                | 0006612 // protein targeting to membrane // not recorded///0006810 // transport // inf      |
| NM_0294      | 0.0226       |       |       |       | -1.06  | -1.44  | 1.09   | -1.05  | <i>Slc10a6</i>                                                        | solute carrier family 10 (sodium/bile acid cotransporter family), member 6                 | 0006810 // transport // inferred from electronic annotation///0006811 // ion transport /    |
| NM_0242      | 0.0037       | 0.031 | 0.035 |       | -1.04  | 1.10   | 1.09   | 1.05   | <i>Anapc4</i>                                                         | anaphase promoting complex subunit 4                                                       | 0007049 // cell cycle // inferred from electronic annotation///0007067 // mitotic nuclear   |
| NM_144884    |              | 0.026 |       |       | -1.09  | 1.02   | 1.09   | -1.08  | <i>Tor1a</i>                                                          | torin family 1, member A (torin A)                                                         | 0000338 // protein deneddylation // not recorded///0006979 // response to oxidative sti     |
| NM_173865    |              |       | 0.002 |       | 1.01   | 1.07   | 1.09   | 1.33   | <i>Slc41a1</i>                                                        | solute carrier family 41, member 1                                                         | 0006810 // transport // inferred from electronic annotation///0006811 // ion transport /    |
| NM_022011    | ///XM        | 0.03  | 0.011 |       | -1.13  | -1.15  | 1.09   | 1.10   | <i>Gtf2h2</i>                                                         | general transcription factor II H, polypeptide 2                                           | 0002031 // G-protein coupled receptor internalization // not recorded///0006281 // DNz      |
| NM_001136070 | ///          | 0.036 |       |       | 1.02   | 1.08   | 1.10   | 1.09   | <i>Eif2d</i>                                                          | eukaryotic translation initiation factor 2D                                                | 0001731 // formation of translation preinitiation complex // not recorded///0002192 // DNz  |
| NM_0138      | 0.0076       |       |       |       | -1.09  | -1.58  | 1.10   | 1.01   | <i>Bag3</i>                                                           | BCL2-associated athanogene 3                                                               | 0006915 // apoptotic process // inferred from electronic annotation///0007420 // brain r    |
| NM_026521    |              | 0.032 |       |       | -1.05  | -1.02  | 1.10   | -1.02  | <i>Zfp706</i>                                                         | zinc finger protein 706                                                                    | 0006417 // regulation of translation // inferred from electronic annotation///0045892 //    |
| NM_0011      | 0.0327       |       |       |       | 1.03   | -1.14  | 1.10   | 1.07   | <i>Zfp790</i>                                                         | zinc finger protein 790                                                                    | 0006355 // regulation of transcription, DNA-templated // inferred from electronic annotz    |
| NM_009730    | ///XM_006498 | 0.021 |       |       | 1.15   | 1.04   | 1.10   | -1.10  | <i>Atrn</i>                                                           | atractin                                                                                   | 0006954 // inflammatory response // inferred from electronic annotation///0006979 // r      |
| NM_001291358 | ///NM_14     | 0.044 |       |       | -1.04  | -1.01  | 1.10   | 1.31   | <i>Pgap2</i>                                                          | post-GPI attachment to proteins 2                                                          | 0006506 // GPI anchor biosynthetic process // not recorded///0006974 // cellular respon     |
| NM_172592    | ///XM_006511 | 0.046 |       |       | -1.01  | 1.04   | 1.10   | 1.21   | <i>Srek1</i>                                                          | splicing regulatory glutamine/lysine-rich protein 1                                        | 0006397 // mRNA processing // inferred from electronic annotation///0008380 // RNA sp       |
| NM_001042491 | ///NM_00     | 0.017 |       |       | 1.10   | 1.09   | 1.10   | -1.02  | <i>Anapc5</i>                                                         | anaphase-promoting complex subunit 5                                                       | 0007049 // cell cycle // inferred from electronic annotation///0007067 // mitotic nuclear   |
| NM_133238    |              | 0.022 |       |       | -1.23  | -1.14  | 1.10   | -1.05  | <i>Cd209a</i>                                                         | CD209a antigen                                                                             | 0006897 // endocytosis // inferred from electronic annotation///0010468 // regulation o     |
| NM_0013      | 0.0126       |       |       |       | -1.05  | 1.18   | 1.10   | 1.04   | <i>Ppp1r1b</i>                                                        | protein phosphatase 1, regulatory (inhibitor) subunit 1B                                   | 0001975 // response to amphetamine // inferred from genetic interaction///0006351 // r      |
| NM_0010      | 0.0353       |       |       |       | -1.04  | 1.11   | 1.10   | 1.02   | <i>Nasp</i>                                                           | nuclear autoantigenic sperm protein (histone-binding)                                      | 0001824 // blastocyst development // inferred from mutant phenotype///0006260 // DN         |
| NM_001170332 | ///          | 0.016 |       |       | -1.04  | 1.01   | 1.10   | -1.04  | <i>Clec4a2</i> /// <i>Clec4b1</i>                                     | C-type lectin domain family 4, member a2///C-type lectin domain family 4, member b1        | 0000250 // adaptive immune response // inferred from electronic annotation///0002376        |
| NM_1461      | 0.0046       |       |       |       | -1.04  | 1.22   | 1.10   | 1.09   | <i>Tubb4b</i> /// <i>Tubb4b-ps1</i>                                   | tubulin, beta 4B class IVB///tubulin, beta 4B class IVB, pseudogene 1                      | 0007017 // microtubule-based process // non-traceable author statement///0008152 //         |
| NM_0011      | 0.0419       |       |       |       | -1.02  | 1.11   | 1.10   | 1.01   | <i>Cebpz</i>                                                          | CCAAT/enhancer binding protein (C/EBP), zeta, opposite strand                              |                                                                                             |
| NM_0259      | 0.0483       |       |       |       | 1.09   | -1.04  | 1.10   | 1.11   | <i>Mettl6</i>                                                         | methyltransferase like 6                                                                   | 0032259 // methylation // inferred from electronic annotation                               |
| NM_0117      | 0.0455       |       |       |       | -1.03  | -1.19  | 1.10   | -1.04  | <i>Ercc5</i>                                                          | excision repair cross-complementing rodent repair deficiency, complementation group        | 0006281 // DNA repair // inferred from mutant phenotype///0006283 // transcription-cc       |
| NM_001314013 | ///          | 0.03  | 0.027 |       | 1.02   | 1.06   | 1.10   | 1.15   | <i>Atg5</i>                                                           | autophagy related 5                                                                        | 0000045 // autophagosome assembly // inferred from mutant phenotype///0000422 // r          |
| NM_0076      | 0.0357       |       |       |       | 1.04   | 1.56   | 1.10   | -1.14  | <i>Cd48</i>                                                           | CD48 antigen                                                                               | 0007165 // signal transduction // inferred from direct assay///0042110 // T cell activatio  |
| NM_0012      | 0.0198       |       |       |       | -1.02  | 1.19   | 1.10   | 1.35   | <i>Gapdh</i> /// <i>Gapdh-ps15</i> /// <i>Gm10313</i> /// <i>Gm12</i> | glyceraldehyde-3-phosphate dehydrogenase pseudogene///glyceraldehyde-3-phosph              | 0000226 // microtubule cytoskeleton organization // not recorded///0005975 // carbohy       |
| NM_001161746 | ///NM_01     | 0.041 |       |       | 1.24   | 1.34   | 1.10   | -1.12  | <i>Tnfrsf12a</i>                                                      | tumor necrosis factor receptor superfamily, member 12a                                     | 0001525 // angiogenesis // inferred from electronic annotation///0006915 // apoptotic c     |
| NM_001136067 | ///          | 0.04  |       |       | 1.01   | 1.06   | 1.10   | 1.18   | <i>Ikbkg</i>                                                          | inhibitor of kappaB kinase gamma                                                           | 0001782 // B cell homeostasis // inferred from mutant phenotype///0006351 // transcrip      |
| NM_0013      | 0.0213       |       |       |       | 1.00   | 1.17   | 1.10   | 1.20   | <i>Scfd1</i>                                                          | Sec1 family domain containing 1                                                            | 0000902 // cell morphogenesis // inferred from sequence or structural similarity///0001E    |
| NM_001294322 | ///          | 0.042 |       |       | -1.07  | -1.00  | 1.10   | 1.16   | <i>Mpv17</i>                                                          | Mpv17 mitochondrial inner membrane protein                                                 | 0000002 // mitochondrial genome maintenance // not recorded///0007605 // sensory pr         |
| NM_0010      | 0.0082       |       |       |       | 1.10   | 1.37   | 1.10   | 1.08   | <i>Grk6</i>                                                           | G protein-coupled receptor kinase 6                                                        | 0002029 // desensitization of G-protein coupled receptor protein signaling pathway // nc    |
| NM_009786    |              | 0.015 |       |       | -1.37  | -1.78  | 1.10   | -1.35  | <i>Cacybp</i>                                                         | calyculin binding protein                                                                  | 0007507 // heart development // inferred from electronic annotation///0007568 // agin       |
| NM_1751      | 0.0346       |       |       |       | 1.05   | -1.01  | 1.10   | 1.05   | <i>Emc3</i>                                                           | ER membrane protein complex subunit 3                                                      | 0034975 // protein folding in endoplasmic reticulum // not recorded                         |
| NM_0011      | 0.038        |       |       |       | 1.01   | 1.22   | 1.10   | -1.22  | <i>Crif2</i>                                                          | cytokine receptor-like factor 2                                                            | 0002380 // immunoglobulin secretion involved in immune response // inferred from dire       |
| NM_0105      | #####        |       |       |       | 1.20   | 2.94   | 1.10   | 1.08   | <i>Cyr61</i>                                                          | cysteine rich protein 61                                                                   | 0001558 // regulation of cell growth // inferred from electronic annotation///0001649 //    |
| NM_001098271 | ///NM_02     | 0.015 |       |       | -1.03  | 1.02   | 1.10   | 1.16   | <i>Tmem176a</i>                                                       | transmembrane protein 176A                                                                 | 2001199 // negative regulation of dendritic cell differentiation // inferred from mutant pl |
| NM_0103      | 0.0289       |       |       |       | 1.02   | 1.43   | 1.10   | 1.27   | <i>H2-DMb1</i> /// <i>H2-DMb2</i> /// <i>LOC102642102</i>             | histocompatibility 2, class II, locus Mb1///histocompatibility 2, class II, locus Mb2///un | 0002376 // immune system process // inferred from electronic annotation///0002504 //        |
| NM_028131    | ///XM        | 0.014 |       |       | -1.06  | 1.06   | 1.10   | 1.00   | <i>Cenpn</i>                                                          | centromere protein N                                                                       | 0007059 // chromosome segregation // inferred from electronic annotation///0007067 //       |
| NM_0306      | 0.0081       |       |       |       | -1.12  | 1.27   | 1.10   | 1.27   | <i>Gpx2</i>                                                           | glutathione peroxidase 2                                                                   | 0001659 // temperature homeostasis // inferred from genetic interaction///0002862 // n      |
| NM_0114      | 0.0083       |       |       |       | 1.08   | 1.30   | 1.10   | 1.00   | <i>Sptlc2</i>                                                         | serine palmitoyltransferase, long chain base subunit 2                                     | 0006629 // lipid metabolic process // inferred from electronic annotation///0006665 // s    |
| NM_024475    | ///XM_006534 | 0.026 |       |       | -1.00  | 1.00   | 1.10   | 1.20   | <i>Ublcp1</i>                                                         | ubiquitin-like domain containing CTD phosphatase 1                                         | 0006470 // protein dephosphorylation // not recorded                                        |
| NM_1449      | 0.0236       | 0.013 |       |       | 1.00   | 1.14   | 1.10   | -1.00  | <i>Smyd5</i>                                                          | SET and MYND domain containing 5                                                           | 0032259 // methylation // inferred from electronic annotation                               |
| NM_0011      | 0.0055       |       |       |       | 1.03   | -1.06  | 1.10   | 1.10   | <i>Aplp2</i>                                                          | amyloid beta (A4) precursor-like protein 2                                                 | 0001967 // suckling behavior // inferred from genetic interaction///0006878 // cellular c   |
| NM_001048057 | ///          | 0.032 |       |       | -1.07  | -1.01  | 1.10   | 1.04   | <i>Rpl38</i>                                                          | ribosomal protein L38                                                                      | 0001501 // skeletal system development // inferred from mutant phenotype///0001501 .        |

| RefSeq       | Tri     | p 24h  | p 48h | p 72h | FD Air | FD 24h | FD 48h | FD 72h | Gene Symbol                                     | Gene Title                                                                             | Gene Ontology Biological Process                                                           |
|--------------|---------|--------|-------|-------|--------|--------|--------|--------|-------------------------------------------------|----------------------------------------------------------------------------------------|--------------------------------------------------------------------------------------------|
| NM_0252      |         | 0.0394 | 0.018 |       | -1.08  | 1.03   | 1.10   | -1.02  | <b>Mecr</b>                                     | mitochondrial trans-2-enoyl-CoA reductase                                              | 0006629 // lipid metabolic process // inferred from electronic annotation//0006631 // f.   |
| NM_0011      |         | 0.0181 |       | 0.027 | -1.03  | 1.13   | 1.10   | 1.15   | <b>Slc35b3</b>                                  | solute carrier family 35, member B3                                                    | 0002230 // positive regulation of defense response to virus by host // not recorded//000   |
| NM_008858    | //XM    | 0.014  |       |       | -1.14  | -1.23  | 1.10   | 1.03   | <b>Prkd1</b>                                    | protein kinase D1                                                                      | 0001525 // angiogenesis // inferred from electronic annotation//0001938 // positive reg    |
| NM_027357    |         | 0.038  |       |       | -1.11  | -1.01  | 1.10   | 1.08   | <b>Psmc1</b>                                    | proteasome (prosome, macropain) 26S subunit, non-ATPase, 1                             | 0042176 // regulation of protein catabolic process // inferred from electronic annotation  |
| NM_026030    |         | 0.023  |       |       | -1.10  | 1.01   | 1.10   | 1.01   | <b>Eif2s2</b>                                   | eukaryotic translation initiation factor 2, subunit 2 (beta)                           | 0001701 // in utero embryonic development // inferred from mutant phenotype//0002:         |
| NM_012012    | //XM    | 0.02   |       |       | -1.12  | 1.04   | 1.10   | -1.06  | <b>Exo1</b>                                     | exonuclease 1                                                                          | 0002376 // immune system process // inferred from electronic annotation//0002455 //        |
| NM_0010      |         | 0.0043 |       |       | 1.30   | 1.00   | 1.10   | 1.27   | <b>Atp2b2</b>                                   | ATPase, Ca++ transporting, plasma membrane 2                                           | 0000902 // cell morphogenesis // inferred from mutant phenotype//0006810 // transp         |
| NM_0012      |         | 0.0435 |       |       | -1.02  | 1.05   | 1.11   | 1.01   | <b>Pfkfb</b>                                    | phosphofructokinase, platelet                                                          | 0006002 // fructose 6-phosphate metabolic process // not recorded//0006096 // glycol       |
| NM_009838    |         | 0.042  |       |       | -1.07  | -1.11  | 1.11   | 1.02   | <b>Cct6a</b>                                    | chaperonin containing Tcp1, subunit 6a (zeta)                                          | 0006457 // protein folding // inferred from electronic annotation//0007339 // binding c    |
| NM_0120      |         | 0.0107 |       |       | -1.03  | 1.13   | 1.11   | 1.18   | <b>Cops6</b>                                    | COP9 (constitutive photomorphogenic) homolog, subunit 6 (Arabidopsis thaliana)         | 0010388 // cullin deneddylation // not recorded                                            |
| NM_001285452 | //      | 0.014  | 0.026 |       | -1.33  | -1.38  | 1.11   | 1.09   | <b>Tmem33</b>                                   | transmembrane protein 33                                                               | 0034613 // cellular protein localization // not recorded//0051292 // nuclear pore compl    |
| NM_001303423 | //NM_00 | 0.022  |       |       | -1.01  | -1.10  | 1.11   | 1.32   | <b>Aldoc</b>                                    | aldolase C, fructose-bisphosphate                                                      | 0006096 // glycolytic process // inferred from electronic annotation//0006915 // apopt     |
| NM_1810      |         | 0.0375 |       |       | 1.08   | -1.00  | 1.11   | -1.07  | <b>Plekhh1</b>                                  | pleckstrin homology domain containing, family H (with MyTH4 domain) member 1           |                                                                                            |
| NM_0111      |         | 0.0086 |       |       | 1.17   | 2.12   | 1.11   | 1.14   | <b>Pou2af1</b>                                  | POU domain, class 2, associating factor 1                                              | 0006351 // transcription, DNA-templated // inferred from electronic annotation//00063      |
| NM_0082      |         | 0.003  |       |       | -1.14  | 1.36   | 1.11   | 1.09   | <b>Hcls1</b>                                    | hematopoietic cell specific Lyn substrate 1                                            | 0000122 // negative regulation of transcription from RNA polymerase II promoter // infer   |
| NM_1537      |         | 0.0497 |       |       | -1.00  | 1.18   | 1.11   | 1.03   | <b>Pygb</b>                                     | brain glycogen phosphorylase                                                           | 0005975 // carbohydrate metabolic process // inferred from electronic annotation//000      |
| NM_019814    | //XM    | 0.032  |       |       | -1.14  | -1.03  | 1.11   | 1.04   | <b>Higd1a</b>                                   | HIG1 domain family, member 1A                                                          | 0006810 // transport // inferred from electronic annotation//0042149 // cellular respon    |
| NM_021518    | //XM    | 0.011  |       |       | -1.04  | 1.01   | 1.11   | 1.01   | <b>Rab2a</b>                                    | RAB2A, member RAS oncogene family                                                      | 0006810 // transport // inferred from electronic annotation//0006886 // intracellular pr   |
| NM_0091      |         | 0.0199 |       |       | -1.12  | 1.11   | 1.11   | 1.11   | <b>S100a10</b> // <b>LOC105242499</b>           | S100 calcium binding protein A10 (calpactin)//protein S100-A10-like                    | 0001765 // membrane raft assembly // not recorded//0006900 // membrane budding /           |
| NM_0265      |         | 0.0445 | 0.031 |       | 1.01   | 1.06   | 1.11   | -1.02  | <b>N6amt2</b>                                   | N-6 adenine-specific DNA methyltransferase 2 (putative)                                | 0032259 // methylation // inferred from electronic annotation                              |
| NM_0011      |         | 0.0096 |       |       | -1.05  | -1.33  | 1.11   | -1.01  | <b>Erlin1</b>                                   | ER lipid raft associated 1                                                             | 0006629 // lipid metabolic process // inferred from electronic annotation//0008202 // s    |
| NM_1340      |         | 0.0139 | 0.003 |       | -1.10  | 1.13   | 1.11   | -1.04  | <b>Fbxo4</b>                                    | F-box protein 4                                                                        | 0000209 // protein polyubiquitination // not recorded//0000723 // telomere maintain        |
| NM_1339      |         | 0.0159 |       |       | 1.07   | -1.14  | 1.11   | 1.07   | <b>Plekha1</b>                                  | pleckstrin homology domain containing, family A (phosphoinositide binding specific) r  | 0001553 // luteinization // inferred from genetic interaction//0007283 // spermatogene     |
| NM_0284      |         | 0.0417 |       |       | 1.02   | 1.17   | 1.11   | -1.05  | <b>Prrc1</b>                                    | proline-rich coiled-coil 1                                                             |                                                                                            |
| NM_0010      |         | 0.0068 |       |       | 1.09   | 1.54   | 1.11   | 1.17   | <b>Capp</b>                                     | capping protein (actin filament), gelsolin-like                                        | 0030031 // cell projection assembly // inferred from direct assay//0051016 // barbed-er    |
| NM_021457    |         | 0.023  |       |       | -1.01  | 1.06   | 1.11   | 1.16   | <b>Fzd1</b>                                     | frizzled homolog 1 (Drosophila)                                                        | 0001934 // positive regulation of protein phosphorylation // inferred from mutant phenc    |
| NM_026792    |         | 0.033  |       |       | -1.07  | -1.06  | 1.11   | 1.02   | <b>Agnat5</b>                                   | 1-acylglycerol-3-phosphate O-acyltransferase 5 (lysophosphatidic acid acyltransferase, | 0002244 // hematopoietic progenitor cell differentiation // inferred from genetic interact |
| NM_024433    |         | 0.021  |       |       | -1.02  | 1.07   | 1.11   | 1.03   | <b>Mtap</b>                                     | methylthioadenosine phosphorylase                                                      | 0006166 // purine ribonucleoside salvage // inferred from electronic annotation//00091     |
| NM_0010      |         | 0.0461 | 0.039 |       | 1.06   | -1.01  | 1.11   | 1.09   | <b>Vprbp</b>                                    | Vpr (HIV-1) binding protein                                                            | 0000122 // negative regulation of transcription from RNA polymerase II promoter // not r   |
| NM_0089      |         | 0.0107 |       |       | -1.07  | 1.24   | 1.11   | 1.12   | <b>Psmb6</b>                                    | proteasome (prosome, macropain) subunit, beta type 6                                   | 0006508 // proteolysis // inferred from electronic annotation//0010499 // proteasomal      |
| NM_021539    |         | 0.004  |       |       | -1.07  | 1.01   | 1.11   | 1.05   | <b>Wsb2</b>                                     | WD repeat and SOCS box-containing 2                                                    | 0016567 // protein ubiquitination // inferred from electronic annotation//0035556 // in    |
| NM_0256      |         | 0.0401 |       |       | 1.05   | 1.24   | 1.11   | 1.04   | <b>Pspc1</b>                                    | paraspeckle protein 1                                                                  | 0000398 // mRNA splicing, via spliceosome // not recorded//0006351 // transcription, C     |
| NM_0173      |         | 0.0071 | 0.011 |       | 1.55   | 1.11   | 1.11   | 1.74   | <b>Tef</b>                                      | thyrotroph embryonic factor                                                            | 0006351 // transcription, DNA-templated // inferred from electronic annotation//00063      |
| NM_0217      |         | 0.0187 |       |       | -1.16  | 1.52   | 1.11   | -1.09  | <b>Ms4a4b</b>                                   | membrane-spanning 4-domains, subfamily A, member 4B                                    |                                                                                            |
| NM_010751    | //XM    | 0.025  |       |       | -1.06  | 1.03   | 1.11   | -1.20  | <b>Mxd1</b>                                     | MAX dimerization protein 1                                                             | 0000122 // negative regulation of transcription from RNA polymerase II promoter // not r   |
| NM_001242349 | //      | 0.005  | 0.005 |       | -1.15  | 1.16   | 1.11   | 1.20   | <b>Ano1</b>                                     | anoctamin 1, calcium activated chloride channel                                        | 0006810 // transport // inferred from electronic annotation//0006811 // ion transport /    |
| NM_0012      |         | 0.0017 |       |       | -1.15  | 1.16   | 1.11   | 1.20   | <b>Ano1</b>                                     | anoctamin 1, calcium activated chloride channel                                        | 0006810 // transport // inferred from electronic annotation//0006811 // ion transport /    |
| NM_1445      |         | 0.0111 |       |       | 1.05   | 1.19   | 1.11   | 1.23   | <b>Bre</b>                                      | brain and reproductive organ-expressed protein                                         | 0006281 // DNA repair // inferred from electronic annotation//0006302 // double-stran      |
| NM_0264      |         | 0.0136 |       |       | 1.06   | 1.23   | 1.11   | 1.03   | <b>Atp5g2</b> // <b>LOC102641133</b>            | ATP synthase, H+ transporting, mitochondrial FO complex, subunit C2 (subunit 9)//AT    | 0006810 // transport // inferred from electronic annotation//0006811 // ion transport /    |
| NM_0084      |         | 0.0483 |       |       | -1.07  | 1.13   | 1.11   | 1.12   | <b>Itn2a</b>                                    | integral membrane protein 2A                                                           |                                                                                            |
| NM_001039718 | //      | 0.023  |       |       | -1.01  | 1.06   | 1.11   | -1.14  | <b>Cntf</b> // <b>Zfp91</b> // <b>Zfp91Cntf</b> | ciliary neurotrophic factor//zinc finger protein 91//Zfp91-Cntf readthrough transcrip  | 0007250 // activation of NF-kappaB-inducing kinase activity // not recorded//0007259 /     |
| NM_026842    | //NM    | 0.034  |       |       | -1.11  | -1.11  | 1.11   | -1.08  | <b>Ubqln1</b>                                   | ubiquilin 1                                                                            | 0006914 // autophagy // inferred from electronic annotation//0016241 // regulation of      |
| NM_0010      |         | 0.0209 |       |       | -1.01  | 1.19   | 1.11   | 1.10   | <b>Med15</b>                                    | mediator complex subunit 15                                                            | 0006351 // transcription, DNA-templated // inferred from electronic annotation//00063      |
| NM_0012      |         | 0.0282 | 0.014 | 0.02  | -1.13  | 1.00   | 1.11   | 1.03   | <b>Farsb</b>                                    | phenylalanyl-tRNA synthetase, beta subunit                                             | 0006412 // translation // inferred from electronic annotation//0006432 // phenylalanyl-    |
| NM_0286      |         | 0.047  |       |       | 1.04   | -1.11  | 1.11   | 1.12   | <b>Mcee</b>                                     | methylmalonyl CoA epimerase                                                            | 0046491 // L-methylmalonyl-CoA metabolic process // not recorded                           |
| NM_0012      |         | 0.0489 |       |       | 1.03   | -1.08  | 1.11   | -1.15  | <b>Fam105a</b>                                  | family with sequence similarity 105, member A                                          |                                                                                            |
| NM_0263      |         | 0.0229 |       |       | 1.02   | 1.19   | 1.11   | 1.02   | <b>Poldip2</b>                                  | polymerase (DNA-directed), delta interacting protein 2                                 | 0070584 // mitochondrion morphogenesis // inferred from mutant phenotype                   |
| NM_0196      |         | 0.0487 |       |       | 1.00   | -1.04  | 1.11   | 1.14   | <b>Socs5</b>                                    | suppressor of cytokine signaling 5                                                     | 0006469 // negative regulation of protein kinase activity // not recorded//0007173 // eq   |
| NM_001271531 | //NM_00 | 0.035  |       |       | -1.01  | 1.03   | 1.11   | 1.15   | <b>Insig2</b>                                   | insulin induced gene 2                                                                 | 0006629 // lipid metabolic process // inferred from electronic annotation//0006641 //      |
| NM_0256      |         | 0.0487 |       |       | 1.01   | 1.08   | 1.11   | 1.14   | <b>Smc6</b>                                     | structural maintenance of chromosomes 6                                                | 0000722 // telomere maintenance via recombination // not recorded//0000724 // doub         |
| NM_1535      |         | 0.0107 |       |       | -1.02  | 1.12   | 1.11   | 1.07   | <b>Bcl2l13</b>                                  | BCL2-like 13 (apoptosis facilitator)                                                   | 0006915 // apoptotic process // inferred from reviewed computational analysis//00429:      |
| NM_0011      |         | 0.0254 |       |       | 1.04   | 1.21   | 1.11   | 1.00   | <b>H13</b>                                      | histocompatibility 13                                                                  | 0006508 // proteolysis // inferred from electronic annotation//0033619 // membrane p       |
| NM_0012      |         | 0.0139 | 0.01  |       | -1.37  | -2.16  | 1.11   | -1.21  | <b>Ahsa2</b>                                    | AHA1, activator of heat shock protein ATPase 2                                         | 0006950 // response to stress // inferred from electronic annotation//0032781 // posit     |
| NM_0011      |         | 0.0366 | 0.031 |       | 1.01   | 1.13   | 1.12   | 1.07   | <b>Orc3</b>                                     | origin recognition complex, subunit 3                                                  | 0006260 // DNA replication // traceable author statement//0061351 // neural precursor      |
| NM_1986      |         | 0.0301 |       |       | 1.09   | 1.27   | 1.12   | 1.01   | <b>Ap2s1</b>                                    | adaptor-related protein complex 2, sigma 1 subunit                                     | 0006810 // transport // inferred from electronic annotation//0006886 // intracellular pr   |
| NM_001163332 | //      | 0.043  |       |       | -1.18  | -1.49  | 1.12   | 1.07   | <b>Cttnbp2nl</b>                                | CTTNBP2 N-terminal like                                                                | 0006470 // protein dephosphorylation // inferred from direct assay//0006470 // protein     |
| NM_1339      |         | 0.048  |       |       | 1.02   | 1.18   | 1.12   | 1.05   | <b>Fig4</b>                                     | FIG4 homolog (S. cerevisiae)                                                           | 0007033 // vacuole organization // inferred from mutant phenotype//0007626 // locom        |
| NM_1528      |         | 0.024  | 0.007 |       | -1.08  | 1.11   | 1.12   | -1.05  | <b>Ttc27</b>                                    | tetratricopeptide repeat domain 27                                                     |                                                                                            |
| NM_0267      |         | 0.0148 |       |       | -1.03  | 1.23   | 1.12   | -1.01  | <b>Mphosph6</b>                                 | M phase phosphoprotein 6                                                               | 0000460 // maturation of 5.8S rRNA // not recorded//0006364 // rRNA processing // inf      |
| NM_134010    | //XM    | 0.036  |       |       | -1.01  | 1.09   | 1.12   | 1.08   | <b>Nup107</b>                                   | nucleoporin 107                                                                        | 0000973 // posttranscriptional tethering of RNA polymerase II gene DNA at nuclear perip    |
| NM_025578    |         | 0.01   |       |       | -1.02  | -1.02  | 1.12   | 1.00   | <b>Mmps25</b>                                   | mitochondrial ribosomal protein S25                                                    | 0032543 // mitochondrial translation // inferred by curator                                |
| NM_0260      |         | 0.006  |       |       | -1.03  | 1.24   | 1.12   | 1.00   | <b>Cdt1</b>                                     | chromatin licensing and DNA replication factor 1                                       | 0000076 // DNA replication checkpoint // inferred from direct assay//0000076 // DNA r      |
| NM_1462      |         | 0.0278 |       |       | 1.10   | -1.12  | 1.12   | 1.04   | <b>Msantd2</b>                                  | Myb/SANT-like DNA-binding domain containing 2                                          |                                                                                            |
| NM_021511    |         | 0.025  |       |       | -1.10  | 1.02   | 1.12   | 1.08   | <b>Rrs1</b>                                     | RRS1 ribosome biogenesis regulator homolog (S. cerevisiae)                             | 0000055 // ribosomal large subunit export from nucleus // ---//0000447 // endonucleo       |

| RefSeq       | Tri         | p 24h  | p 48h | p 72h | FD Air | FD 24h | FD 48h | FD 72h | Gene Symbol        | Gene Title                                                                             | Gene Ontology Biological Process                                                            |
|--------------|-------------|--------|-------|-------|--------|--------|--------|--------|--------------------|----------------------------------------------------------------------------------------|---------------------------------------------------------------------------------------------|
| NM_0083      |             | 0.0224 |       |       | 1.05   | -1.07  | 1.12   | 1.12   | <i>Sdc2</i>        | syndecan 2                                                                             | 0007399 // nervous system development // inferred from electronic annotation//00164         |
| NM_0261      |             | 0.0218 | 0.003 | 0.013 | -1.11  | 1.02   | 1.12   | 1.05   | <i>Ergic1</i>      | endoplasmic reticulum-golgi intermediate compartment (ERGIC) 1                         | 0006810 // transport // inferred from electronic annotation//0006888 // ER to Golgi ves     |
| NM_001164406 | ///         | 0.014  |       |       | -1.02  | 1.06   | 1.12   | 1.00   | <i>Apbb3//Sra1</i> | amyloid beta (A4) precursor protein-binding, family B, member 3//steroid receptor RI   | 0006351 // transcription, DNA-templated // inferred from electronic annotation//00063       |
| NM_0265      |             | 0.0462 |       |       | 1.04   | 1.33   | 1.12   | -1.05  | <i>Psmc8</i>       | proteasome (prosome, macropain) 26S subunit, non-ATPase, 8                             | 0006508 // proteolysis // inferred from electronic annotation//0031647 // regulation of     |
| NM_007512    | ///XM       | 0.05   |       |       | -1.09  | 1.01   | 1.12   | 1.09   | <i>Atpf1</i>       | ATPase inhibitory factor 1                                                             | 0001937 // negative regulation of endothelial cell proliferation // not recorded//000678    |
| NM_0223      | #####       |        |       |       | 1.02   | -1.56  | 1.12   | -1.09  | <i>Herpud1</i>     | homocysteine-inducible, endoplasmic reticulum stress-inducible, ubiquitin-like domain  | 0006511 // ubiquitin-dependent protein catabolic process // inferred from direct assay//    |
| NM_0254      |             | 0.0205 | 0.006 |       | -1.08  | 1.12   | 1.12   | -1.09  | <i>Sec11c</i>      | SEC11 homolog C, signal peptidase complex subunit                                      | 0006465 // signal peptide processing // inferred from electronic annotation//0006508 //     |
| NM_001142357 | ///         | #####  |       |       | -1.01  | -1.01  | 1.12   | 1.04   | <i>Alg12</i>       | asparagine-linked glycosylation 12 (alpha-1,6-mannosyltransferase)                     | 0006486 // protein glycosylation // inferred from electronic annotation//0006487 // prc     |
| NM_0103      |             | 0.0029 | 0.004 |       | -1.07  | 1.15   | 1.12   | 1.13   | <i>Got2</i>        | glutamate-oxaloacetate transaminase 2, mitochondrial                                   | 0006103 // 2-oxoglutarate metabolic process // inferred from sequence or structural sim     |
| NM_0256      |             | 0.024  | 0.037 |       | -1.02  | -1.10  | 1.12   | 1.05   | <i>Agg1</i>        | angiogenic factor with G patch and FHA domains 1                                       | 0001525 // angiogenesis // inferred from electronic annotation//0001938 // positive reg     |
| NM_0118      |             | 0.0086 |       |       | 1.04   | 1.27   | 1.12   | 1.16   | <i>Esy1</i>        | extended synaptotagmin-like protein 1                                                  | 0006810 // transport // inferred from electronic annotation//0006869 // lipid transport     |
| NM_001164107 | ///NM_00    |        | 0.048 |       | -1.07  | 1.16   | 1.12   | 1.11   | <i>Ripk3</i>       | receptor-interacting serine-threonine kinase 3                                         | 0001914 // regulation of T cell mediated cytotoxicity // inferred from genetic interaction/ |
| NM_008597    |             |        | 0.011 |       | -1.09  | -1.10  | 1.12   | 1.06   | <i>Mgp</i>         | matrix Gla protein                                                                     | 0001503 // ossification // inferred from electronic annotation//0006461 // protein com      |
| NM_0281      |             | 0.0066 | 0.004 |       | 1.01   | 1.15   | 1.12   | 1.17   | <i>Scaf11</i>      | SR-related CTD-associated factor 11                                                    | 0000245 // spliceosomal complex assembly // not recorded//0000375 // RNA splicing, v        |
| NM_008490    | #####       |        |       |       | -1.03  | 1.01   | 1.12   | -1.03  | <i>Lcat</i>        | lecithin cholesterol acyltransferase                                                   | 0006629 // lipid metabolic process // inferred from electronic annotation//0006644 // p     |
| NM_0173      |             | 0.0193 | 0.005 |       | -1.06  | 1.04   | 1.12   | -1.04  | <i>Ppp2cb</i>      | protein phosphatase 2 (formerly 2A), catalytic subunit, beta isoform                   | 0006470 // protein dephosphorylation // not recorded//0008637 // apoptotic mitochon         |
| NM_009255    | ///XM       | 0.006  |       |       | -1.16  | -1.26  | 1.12   | 1.02   | <i>Serpine2</i>    | serine (or cysteine) peptidase inhibitor, clade E, member 2                            | 0007275 // multicellular organismal development // inferred from electronic annotation//    |
| NM_0076      |             | 0.0113 |       |       | -1.02  | 1.23   | 1.12   | -1.07  | <i>Cd38</i>        | CD38 antigen                                                                           | 0001666 // response to hypoxia // not recorded//0007204 // positive regulation of cyto      |
| NM_031248    |             | 0.039  |       |       | -1.02  | 1.06   | 1.12   | 1.09   | <i>Lamtor2</i>     | late endosomal/lysosomal adaptor, MAPK and MTOR activator 2                            | 0000186 // activation of MAPKK activity // inferred from direct assay//0016049 // cell gr   |
| NM_145531    | ///NM       | 0.03   |       |       | 1.01   | 1.04   | 1.12   | 1.15   | <i>Spp11</i>       | spastic paraplegia 11                                                                  | 0007409 // axonogenesis // not recorded//0008088 // axon cargo transport // inferred f      |
| NM_0101      |             | 0.0053 |       |       | -1.00  | 1.78   | 1.12   | -1.03  | <i>Egr2</i>        | early growth response 2                                                                | 0006351 // transcription, DNA-templated // inferred from electronic annotation//00063       |
| NM_0011      |             | 0.0476 | 0.015 |       | -1.01  | 1.09   | 1.12   | -1.00  | <i>Slc25a13</i>    | solute carrier family 25 (mitochondrial carrier, adenine nucleotide translocator), mem | 0006754 // ATP biosynthetic process // not recorded//0006810 // transport // inferred f     |
| NM_001177629 | ///         | 0.012  |       |       | -1.11  | -1.17  | 1.12   | 1.08   | <i>Grb10</i>       | growth factor receptor bound protein 10                                                | 0007165 // signal transduction // traceable author statement//0008286 // insulin recep      |
| NM_0266      |             | 0.0014 |       |       | 1.18   | -1.14  | 1.12   | -1.17  | <i>Zmyx1</i>       | zinc finger, MYM domain containing 1                                                   |                                                                                             |
| NM_024188    |             | 0.012  |       |       | -1.13  | -1.09  | 1.12   | -1.03  | <i>Oxct1</i>       | 3-oxoacid CoA transferase 1                                                            | 0007420 // brain development // inferred from electronic annotation//0007507 // heart       |
| NM_0283      |             | 0.0159 | 0.011 |       | -1.06  | 1.13   | 1.12   | 1.00   | <i>Dis3</i>        | DIS3 mitotic control homolog (S. cerevisiae)                                           | 0006364 // rRNA processing // not recorded//0006402 // mRNA catabolic process // no         |
| NM_001301269 |             | 0.02   | 0.015 |       | -1.11  | -1.05  | 1.12   | 1.15   | <i>Inafm2</i>      | InaF motif containing 2                                                                |                                                                                             |
| NM_0011      |             | 0.0323 |       |       | 1.03   | 1.12   | 1.12   | 1.11   | <i>Nol11</i>       | nucleolar protein 11                                                                   | 0006351 // transcription, DNA-templated // inferred from electronic annotation//00063       |
| NM_0012      |             | 0.0033 |       |       | 1.13   | 1.01   | 1.12   | 1.27   | <i>Slc7a7</i>      | solute carrier family 7 (cationic amino acid transporter, y+ system), member 7         | 0000821 // regulation of arginine metabolic process // inferred from mutant phenotype/      |
| NM_0013      |             | 0.0404 |       |       | -1.11  | 1.20   | 1.12   | 1.15   | <i>Il2rg</i>       | interleukin 2 receptor, gamma chain                                                    | 0010468 // regulation of gene expression // inferred from mutant phenotype//0010628         |
| NM_001039084 | ///         | 0.021  |       |       | 1.02   | 1.02   | 1.12   | 1.01   | <i>Mrp1</i>        | mitochondrial ribosomal protein L1                                                     | 0006412 // translation // not recorded                                                      |
| NM_0200      |             | 0.043  |       |       | 1.06   | 1.26   | 1.12   | -1.19  | <i>Taf10</i>       | TAF10 RNA polymerase II, TATA box binding protein (TBP)-associated factor              | 0000082 // G1/S transition of mitotic cell cycle // inferred from mutant phenotype//000     |
| NM_0074      |             | 0.005  |       |       | -1.10  | 1.19   | 1.12   | 1.21   | <i>Slc25a5</i>     | solute carrier family 25 (mitochondrial carrier, adenine nucleotide translocator), mem | 0006810 // transport // inferred from electronic annotation//0007059 // chromosome s        |
| NM_0086      |             | 0.003  | 0.004 |       | -1.15  | 1.09   | 1.12   | -1.14  | <i>Mthfd2</i>      | methylentetrahydrofolate dehydrogenase (NAD+ dependent), methylentetrahydrofolo        | 0006730 // one-carbon metabolic process // not recorded//0008152 // metabolic proce         |
| NM_0280      |             | 0.0293 |       |       | -1.03  | -1.10  | 1.12   | -1.08  | <i>Cnn3</i>        | calponin 3, acidic                                                                     | 0030855 // epithelial cell differentiation // inferred from electronic annotation//003103   |
| NM_009836    |             | 0.006  | 0.039 |       | -1.11  | -1.12  | 1.12   | 1.06   | <i>Cct3</i>        | chaperonin containing Tcp1, subunit 3 (gamma)                                          | 0006457 // protein folding // inferred from electronic annotation//0007339 // binding c     |
| NM_001033201 |             | 0.027  |       |       | -1.01  | 1.03   | 1.12   | 1.05   | <i>Ncbp1</i>       | nuclear cap binding protein subunit 1                                                  | 0000184 // nuclear-transcribed mRNA catabolic process, nonsense-mediated decay // no        |
| NM_010617    | ///XM       | 0.027  |       |       | -1.04  | -1.08  | 1.13   | 1.10   | <i>Kif13a</i>      | kinesin family member 13A                                                              | 0000910 // cytokinesis // not recorded//0006810 // transport // inferred from electroni     |
| NM_026555    | ///XM       | 0.025  |       |       | -1.10  | -1.03  | 1.13   | -1.24  | <i>Rcn3</i>        | reticulocalbin 3, EF-hand calcium binding domain                                       |                                                                                             |
| NM_1454      |             | 0.0323 | 0.008 |       | 1.03   | 1.12   | 1.13   | 1.04   | <i>Ube4a</i>       | ubiquitination factor E4A                                                              | 0000209 // protein polyubiquitination // inferred from direct assay//0006511 // ubiquiti    |
| NM_175451    |             | 0.023  |       |       | -1.12  | -1.01  | 1.13   | 1.15   | <i>Ckap4</i>       | cytoskeleton-associated protein 4                                                      |                                                                                             |
| NM_0011      |             | 0.0461 |       |       | 1.09   | 1.34   | 1.13   | 1.13   | <i>Mef2c</i>       | myocyte enhancer factor 2C                                                             | 0000122 // negative regulation of transcription from RNA polymerase II promoter // infer    |
| NM_019698    | ///NM       | 0.005  | 0.05  |       | -1.15  | 1.01   | 1.13   | 1.07   | <i>Aldh18a1</i>    | aldehyde dehydrogenase 18 family, member A1                                            | 0006536 // glutamate metabolic process // not recorded//0006561 // proline biosynthe        |
| NM_0228      |             | 0.0216 |       |       | 1.11   | -1.01  | 1.13   | 1.09   | <i>Svep1</i>       | sushi, von Willebrand factor type A, EGF and pentraxin domain containing 1             | 0007155 // cell adhesion // inferred from electronic annotation                             |
| NM_0010      |             | 0.0281 |       |       | 1.03   | -1.11  | 1.13   | 1.14   | <i>Cbx5</i>        | chromobox 5                                                                            | 0045892 // negative regulation of transcription, DNA-templated // inferred from direct a    |
| NM_173180    | ///XM       | 0.025  |       |       | -1.00  | -1.00  | 1.13   | 1.04   | <i>Pmpca</i>       | peptidase (mitochondrial processing) alpha                                             | 0006508 // proteolysis // not recorded//0006627 // protein processing involved in prote     |
| NM_145552    | ///XM       | 0.03   |       |       | -1.06  | -1.01  | 1.13   | 1.03   | <i>Gnl2</i>        | guanine nucleotide binding protein-like 2 (nucleolar)                                  | 0042254 // ribosome biogenesis // not recorded                                              |
| NM_0011      |             | 0.0313 |       |       | 1.06   | -1.18  | 1.13   | 1.05   | <i>Gppb1</i>       | GC-rich promoter binding protein 1                                                     | 0006351 // transcription, DNA-templated // inferred from electronic annotation//00063       |
| NM_0531      |             | 0.0137 | ##### |       | -1.03  | 1.13   | 1.13   | -1.01  | <i>Mrp13</i>       | mitochondrial ribosomal protein L3                                                     | 0006412 // translation // not recorded                                                      |
| NM_0011      |             | 0.0079 |       |       | 1.04   | 1.23   | 1.13   | 1.16   | <i>Pcx</i>         | pyruvate carboxylase                                                                   | 0006090 // pyruvate metabolic process // not recorded//0006094 // gluconeogenesis //        |
| NM_0112      |             | 0.0173 |       |       | -1.07  | 1.23   | 1.13   | -1.14  | <i>Ranbp1</i>      | RAN binding protein 1                                                                  | 0007051 // spindle organization // inferred from direct assay//0010976 // positive regul    |
| NM_0254      |             | 0.0165 |       |       | 1.05   | 1.27   | 1.13   | 1.29   | <i>Alg5</i>        | asparagine-linked glycosylation 5 (dolichyl-phosphate beta-glucosyltransferase)        | 0006486 // protein glycosylation // inferred from electronic annotation//0006487 // prc     |
| NM_146067    | ///XM_00652 | 0.045  |       |       | -1.04  | 1.08   | 1.13   | 1.09   | <i>Cpped1</i>      | calcineurin-like phosphoesterase domain containing 1                                   | 0006470 // protein dephosphorylation // inferred from electronic annotation//0008152        |
| NM_0105      |             | 0.0312 | 0.022 |       | 1.20   | 1.11   | 1.13   | 1.12   | <i>Jup</i>         | junction plakoglobin                                                                   | 0002159 // desmosome assembly // inferred from mutant phenotype//0002159 // desm            |
| NM_001301364 | ///         | 0.029  | 0.049 |       | -1.05  | 1.04   | 1.13   | 1.20   | <i>Hdlbp</i>       | high density lipoprotein (HDL) binding protein                                         | 0006629 // lipid metabolic process // inferred from electronic annotation//0006810 // t     |
| NM_198103    |             | 0.042  |       |       | 1.03   | -1.04  | 1.13   | 1.15   | <i>Exoc8</i>       | exocyst complex component 8                                                            | 0001927 // exocyst assembly // not recorded//0006810 // transport // inferred from el       |
| NM_0011      |             | 0.0091 |       |       | 1.14   | -1.01  | 1.13   | 1.23   | <i>Rnf145</i>      | ring finger protein 145                                                                | 0000209 // protein polyubiquitination // ---//0042787 // protein ubiquitination involv      |
| NM_031843    | ///XR_      | 0.037  |       |       | -1.06  | -1.03  | 1.13   | 1.07   | <i>Dpp7</i>        | dipeptidylpeptidase 7                                                                  | 0006508 // proteolysis // not recorded                                                      |
| NM_026438    |             | 0.029  |       |       | -1.15  | 1.03   | 1.13   | -1.11  | <i>Ppa1</i>        | pyrophosphatase (inorganic) 1                                                          | 0006796 // phosphate-containing compound metabolic process // inferred by curator           |
| NM_0095      |             | 0.0176 |       |       | -1.06  | 1.19   | 1.13   | 1.00   | <i>Vcp</i>         | valosin containing protein                                                             | 0006281 // DNA repair // inferred from electronic annotation//0006302 // double-stran       |
| NM_0010      |             | 0.0079 | 0.02  | 0.001 | -1.12  | 1.05   | 1.13   | 1.22   | <i>Klhl42</i>      | kelch-like 42                                                                          | 0000209 // protein polyubiquitination // not recorded//0007049 // cell cycle // inferred    |
| NM_023232    |             | 0.019  |       |       | -1.03  | 1.06   | 1.13   | 1.13   | <i>Diablo</i>      | diablo homolog (Drosophila)                                                            | 0006915 // apoptotic process // inferred from electronic annotation//0006919 // activa      |
| NM_0265      |             | 0.0465 |       |       | 1.07   | 1.00   | 1.13   | 1.22   | <i>Mrp124</i>      | mitochondrial ribosomal protein L24                                                    | 0006412 // translation // inferred from electronic annotation                               |
| NM_0010      |             | 0.001  | 0.022 |       | -1.15  | 1.23   | 1.13   | -1.02  | <i>Rnf149</i>      | ring finger protein 149                                                                | 0016567 // protein ubiquitination // inferred from electronic annotation//0031647 // re     |



| RefSeq       | Tri         | p 24h | p 48h | p 72h | FD Air | FD 24h | FD 48h | FD 72h | Gene Symbol                                                            | Gene Title                                                                                                        | Gene Ontology Biological Process                                                            |
|--------------|-------------|-------|-------|-------|--------|--------|--------|--------|------------------------------------------------------------------------|-------------------------------------------------------------------------------------------------------------------|---------------------------------------------------------------------------------------------|
| NM_145972    | //XM        | 0.006 |       |       | -1.02  | -1.07  | 1.13   | 1.04   | <b>Nepr</b>                                                            | nucleolus and neural progenitor protein                                                                           | 0045665 // negative regulation of neuron differentiation // inferred from direct assay//K   |
| NM_0083      | 0.0089      |       |       |       | -1.04  | 1.15   | 1.13   | 1.12   | <b>ldh3g</b>                                                           | isocitrate dehydrogenase 3 (NAD+), gamma                                                                          | 0006099 // tricarboxylic acid cycle // not recorded//0006102 // isocitrate metabolic pro    |
| NM_008661    | //NM        | 0.04  |       |       | -1.06  | -1.06  | 1.13   | 1.14   | <b>Myo5b</b>                                                           | myosin VB                                                                                                         | 0006810 // transport // inferred from electronic annotation//0008152 // metabolic pro       |
| NM_0011      | 0.0397      | 0.009 |       |       | -1.58  | -1.08  | 1.13   | -1.14  | <b>Pde4b</b>                                                           | phosphodiesterase 4B, cAMP specific                                                                               | 0001780 // neutrophil homeostasis // inferred from mutant phenotype//0006198 // cAI         |
| NM_0134      | 0.0045      |       |       |       | -1.01  | 1.72   | 1.13   | 1.11   | <b>Cd2</b>                                                             | CD2 antigen                                                                                                       | 0007155 // cell adhesion // inferred from electronic annotation//0016337 // single orga     |
| NM_0109      | 0.0179      |       |       |       | 1.07   | -1.17  | 1.13   | 1.15   | <b>Nfe2l2</b>                                                          | nuclear factor, erythroid derived 2, like 2                                                                       | 0006351 // transcription, DNA-templated // inferred from electronic annotation//00063       |
| NM_001077411 | //          | 0.035 |       |       | -1.04  | 1.01   | 1.13   | 1.13   | <b>Gba</b>                                                             | glucosidase, beta, acid                                                                                           | 0005975 // carbohydrate metabolic process // inferred from electronic annotation//000       |
| NM_0012      | 0.0157      |       |       |       | -1.04  | 1.26   | 1.13   | 1.42   | <b>Gapdh</b> // <b>Gapdh-ps15</b> // <b>Gm10313</b> // <b>Gm12</b>     | glyceraldehyde-3-phosphate dehydrogenase//glyceraldehyde-3-phosphate dehydrog                                     | 0000226 // microtubule cytoskeleton organization // not recorded//0005975 // carbohy        |
| NM_025860    | //XM        | 0.012 |       |       | -1.00  | 1.04   | 1.14   | 1.13   | <b>Ddx18</b>                                                           | DEAD (Asp-Glu-Ala-Asp) box polypeptide 18                                                                         | 0010501 // RNA secondary structure unwinding // not recorded                                |
| NM_0260      | 0.0274      | 0.023 |       |       | -1.09  | 1.12   | 1.14   | 1.17   | <b>Eef1g</b>                                                           | eukaryotic translation elongation factor 1 gamma                                                                  | 0006412 // translation // inferred from electronic annotation//0006414 // translational     |
| NM_0012      | 0.0471      |       |       |       | -1.01  | 1.15   | 1.14   | 1.02   | <b>Prnp</b>                                                            | prion protein                                                                                                     | 0001933 // negative regulation of protein phosphorylation // inferred from mutant phen      |
| NM_0270      | 0.0213      |       |       |       | -1.16  | 1.07   | 1.14   | 1.12   | <b>Rfc3</b>                                                            | replication factor C (activator 1) 3                                                                              | 0006260 // DNA replication // not recorded//0006261 // DNA-dependent DNA replicat           |
| NM_019491    | 0.022       |       |       |       | -1.03  | 1.05   | 1.14   | -1.06  | <b>Rala</b>                                                            | v-ral simian leukemia viral oncogene homolog A (ras related)                                                      | 0000910 // cytokinesis // not recorded//0001843 // neural tube closure // inferred from     |
| NM_0011      | 0.0235      |       |       |       | 1.01   | -1.03  | 1.14   | -1.06  | <b>Ino80</b> // <b>Rpl35a</b> // <b>Rpl35a-ps2</b> // <b>Rpl35a-ps</b> | INO80 homolog //ribosomal protein L35A//ribosomal protein L35A, pseudogene 2//                                    | 0000070 // mitotic sister chromatid segregation // not recorded//0000724 // double-str      |
| NM_0076      | 0.0013      | 0.011 |       |       | -1.04  | 1.08   | 1.14   | 1.15   | <b>Casp7</b>                                                           | caspace 7                                                                                                         | 0006508 // proteolysis // not recorded//0006508 // proteolysis // inferred from reviewe     |
| NM_0254      | 0.0241      | 0.036 |       |       | -1.10  | 1.12   | 1.14   | -1.05  | <b>Mrps22</b>                                                          | mitochondrial ribosomal protein S22                                                                               |                                                                                             |
| NM_0104      | 0.0337      |       |       |       | -1.01  | 1.17   | 1.14   | 1.07   | <b>Hexb</b>                                                            | hexosaminidase B                                                                                                  | 0001501 // skeletal system development // inferred from genetic interaction//0005975 ,      |
| NM_0167      | 0.0187      |       |       |       | 1.09   | 1.25   | 1.14   | 1.07   | <b>Smad3</b>                                                           | SMAD family member 3                                                                                              | 0001122 // negative regulation of transcription from RNA polymerase II promoter // infer    |
| NM_0010      | 0.0209      |       |       |       | -1.03  | 1.15   | 1.14   | 1.04   | <b>Eif4e2</b>                                                          | eukaryotic translation initiation factor 4E member 2                                                              | 0001701 // in utero embryonic development // inferred from mutant phenotype//0006           |
| NM_0104      | 0.0074      | 0.015 |       |       | -1.10  | 1.09   | 1.14   | -1.02  | <b>Icam1</b>                                                           | intercellular adhesion molecule 1                                                                                 | 0001541 // ovarian follicle development // inferred from electronic annotation//000166      |
| NM_019639    | 0.042       |       |       |       | 1.07   | -1.02  | 1.14   | 1.01   | <b>Ubc</b>                                                             | ubiquitin C                                                                                                       | 0007623 // circadian rhythm // traceable author statement//0010992 // ubiquitin home        |
| NM_001010937 | //          | 0.041 |       |       | -1.09  | -1.01  | 1.14   | -1.28  | <b>Gjb6</b>                                                            | gap junction protein, beta 6                                                                                      | 0006915 // apoptotic process // inferred from electronic annotation//0007154 // cell co     |
| NM_0012      | 0.0477      |       |       |       | 1.07   | 1.25   | 1.14   | 1.12   | <b>Hgf</b>                                                             | hepatocyte growth factor                                                                                          | 0000187 // activation of MAPK activity // inferred from direct assay//0000902 // cell mc    |
| NM_025460    | 0.013       | 0.048 |       |       | -1.14  | 1.01   | 1.14   | 1.14   | <b>Tmem126a</b>                                                        | transmembrane protein 126A                                                                                        | 0021554 // optic nerve development // not recorded                                          |
| NM_021336    | //XR_391365 | 0.001 |       |       | -1.03  | 1.03   | 1.14   | 1.23   | <b>Snrpa1</b>                                                          | small nuclear ribonucleoprotein polypeptide A'                                                                    | 0000398 // mRNA splicing, via spliceosome // ---//0006397 // mRNA processing // infer       |
| NM_018884    | //XM        | 0.002 |       |       | -1.08  | -1.12  | 1.14   | 1.09   | <b>Pdzrn3</b>                                                          | PDZ domain containing RING finger 3                                                                               | 0007528 // neuromuscular junction development // inferred from mutant phenotype//K          |
| NM_172490    | //XM        | 0.006 |       |       | -1.02  | 1.06   | 1.14   | 1.22   | <b>Secseps</b>                                                         | Sep (O-phosphoserine) tRNA:Sec (selenocysteine) tRNA synthase                                                     | 0001514 // selenocysteine incorporation // inferred from direct assay//0006412 // trans     |
| NM_008079    | //XM        | 0.021 | 0.04  |       | 1.03   | 1.02   | 1.14   | 1.14   | <b>Galc</b>                                                            | galactosylceramidase                                                                                              | 0005975 // carbohydrate metabolic process // inferred from electronic annotation//000       |
| NM_010914    | //XM        | 0.036 |       |       | -1.03  | 1.03   | 1.14   | 1.22   | <b>Nfyb</b>                                                            | nuclear transcription factor-Y beta                                                                               | 0006351 // transcription, DNA-templated // inferred from electronic annotation//00063       |
| NM_0095      | 0.0293      |       |       |       | 1.19   | -1.07  | 1.14   | 1.29   | <b>Wee1</b>                                                            | WEE 1 homolog 1 (S. pombe)                                                                                        | 0000226 // microtubule cytoskeleton organization // inferred from mutant phenotype//        |
| NM_0112      | 0.0318      |       |       |       | -1.02  | 1.13   | 1.14   | 1.16   | <b>Rfc1</b>                                                            | replication factor C (activator 1) 1                                                                              | 0001122 // negative regulation of transcription from RNA polymerase II promoter // not i    |
| NM_0011      | 0.0283      | 0.018 |       |       | -1.02  | 1.16   | 1.14   | -1.02  | <b>Nek6</b>                                                            | NIMA (never in mitosis gene a)-related expressed kinase 6                                                         | 0006468 // protein phosphorylation // not recorded//0006915 // apoptotic process // ir      |
| NM_008971    | //XM_006506 | 0.022 |       |       | -1.04  | 1.01   | 1.14   | 1.22   | <b>Gm4887</b> // <b>Twf1</b>                                           | predicted gene 4887//twinfilin, actin-binding protein, homolog 1 (Drosophila)                                     | 0018108 // peptidyl-tyrosine phosphorylation // inferred from direct assay//0030837 //      |
| NM_0011      | 0.0054      |       |       |       | -1.07  | 1.22   | 1.14   | -1.07  | <b>Raly</b>                                                            | hnRNP-associated with lethal yellow                                                                               | 0006397 // mRNA processing // inferred from electronic annotation//0008380 // RNA sp        |
| NM_001304574 | //          | 0.017 |       |       | 1.02   | 1.11   | 1.14   | 1.20   | <b>Arf2</b>                                                            | ADP-ribosylation factor 2                                                                                         | 0006810 // transport // inferred from electronic annotation//0007264 // small GTPase r      |
| NM_001291146 | //          | 0.008 |       |       | -1.08  | -1.10  | 1.14   | 1.09   | <b>Derl2</b>                                                           | Der1-like domain family, member 2                                                                                 | 0001967 // suckling behavior // inferred from mutant phenotype//0006986 // response         |
| NM_172393    | //XM        | 0.036 |       |       | -1.06  | -1.03  | 1.14   | 1.11   | <b>Aim1</b>                                                            | absent in melanoma 1                                                                                              |                                                                                             |
| NM_025331    | 0.008       |       |       |       | -1.03  | -1.04  | 1.14   | -1.24  | <b>Gng11</b>                                                           | guanine nucleotide binding protein (G protein), gamma 11                                                          | 0007165 // signal transduction // inferred from electronic annotation//0007186 // G-pr      |
| NM_0010      | 0.0281      |       |       |       | 1.12   | -1.01  | 1.14   | 1.09   | <b>Sdcbp</b>                                                           | syndecan binding protein                                                                                          | 0007265 // Ras protein signal transduction // inferred from physical interaction//00072     |
| NM_133895    | //XM        | 0.02  |       |       | -1.05  | -1.04  | 1.14   | 1.08   | <b>Slc15a4</b>                                                         | solute carrier family 15, member 4                                                                                | 0006810 // transport // inferred from electronic annotation//0006857 // oligopeptide tr     |
| NM_172146    | 0.042       |       |       |       | -1.01  | -1.04  | 1.14   | 1.14   | <b>Ppat</b>                                                            | phosphoribosyl pyrophosphate amidotransferase                                                                     | 0000082 // G1/S transition of mitotic cell cycle // inferred from electronic annotation//0  |
| NM_009191    | //XM        | 0.023 |       |       | -1.02  | -1.02  | 1.14   | -1.03  | <b>Clpb</b>                                                            | ClpB caseinolytic peptidase B                                                                                     | 0008152 // metabolic process // inferred from electronic annotation//0034605 // cellul      |
| NM_0010      | 0.0209      |       |       |       | 1.02   | 1.24   | 1.15   | 1.17   | <b>Casp8</b>                                                           | caspace 8                                                                                                         | 0001525 // angiogenesis // inferred from mutant phenotype//0001841 // neural tube fc        |
| NM_001008238 | //          | 0.042 |       |       | -1.10  | 1.07   | 1.15   | -1.04  | <b>Brip2</b>                                                           | BCL2/adenovirus E1B interacting protein 2                                                                         | 0001824 // blastocyst development // inferred from mutant phenotype//0006915 // ap          |
| NM_0010      | 0.0024      |       |       |       | -1.04  | 1.26   | 1.15   | -1.03  | <b>Nme2</b>                                                            | NME/NM23 nucleoside diphosphate kinase 2                                                                          | 0002742 // negative regulation of myeloid leukocyte differentiation // not recorded//00     |
| NM_026850    | 0.041       |       |       |       | -1.04  | -1.02  | 1.15   | 1.04   | <b>Pdcl3</b>                                                           | phosducin-like 3                                                                                                  | 0001525 // angiogenesis // inferred from electronic annotation//0001938 // positive reg     |
| NM_0295      | 0.0328      |       |       |       | 1.05   | -1.02  | 1.15   | 1.16   | <b>Tax1bp3</b>                                                         | Tax1 (human T cell leukemia virus type I) binding protein 3                                                       | 0007266 // Rho protein signal transduction // not recorded//0008285 // negative regula      |
| NM_198831    | //NR_       | 0.015 |       |       | 1.04   | 1.12   | 1.15   | -1.03  | <b>Mrp148</b> // <b>LOC102643207</b> // <b>Mrp148-ps</b>               | mitochondrial ribosomal protein L48//uncharacterized LOC102643207//mitochondrial ribosomal protein L48 pseudogene |                                                                                             |
| NM_0011      | 0.011       |       |       |       | 1.10   | 1.37   | 1.15   | 1.23   | <b>Trp53</b>                                                           | transformation related protein 53                                                                                 | 0000060 // protein import into nucleus, translocation // inferred from direct assay//000    |
| NM_0076      | 0.0033      | 0.043 |       |       | -1.04  | -1.10  | 1.15   | 1.15   | <b>Scarb2</b>                                                          | scavenger receptor class B, member 2                                                                              | 0006622 // protein targeting to lysosome // inferred from mutant phenotype//0006622         |
| NM_001033257 | //          | 0.048 |       |       | 1.01   | -1.18  | 1.15   | -1.04  | <b>Phactr2</b>                                                         | phosphatase and actin regulator 2                                                                                 | 0043086 // negative regulation of catalytic activity // inferred from electronic annotation |
| NM_007735    | //XM        | 0.019 |       |       | 1.02   | 1.09   | 1.15   | 1.01   | <b>Col4a4</b>                                                          | collagen, type IV, alpha 4                                                                                        | 0032836 // glomerular basement membrane development // inferred from mutant phen            |
| NM_001285852 | //NM_00     | 0.041 |       |       | 1.02   | 1.06   | 1.15   | 1.16   | <b>Gsip1</b>                                                           | SH3-domain GRB2-like (endophilin) interacting protein 1                                                           | 0002021 // response to dietary excess // inferred from sequence or structural similarity//  |
| NM_025319    | //XM        | 0.023 | 0.009 |       | -1.21  | -1.03  | 1.15   | 1.08   | <b>O61009B22Rik</b>                                                    | RIKEN cDNA O61009B22 gene                                                                                         | 0006351 // transcription, DNA-templated // inferred from electronic annotation//00063       |
| NM_134101    | //NR_       | 0.014 |       |       | -1.04  | 1.10   | 1.15   | 1.20   | <b>Psm2</b>                                                            | proteasome (prosome, macropain) 26S subunit, non-ATPase, 2                                                        | 0042176 // regulation of protein catabolic process // inferred from electronic annotation   |
| NM_0010      | 0.0407      |       |       |       | 1.05   | 1.23   | 1.15   | 1.34   | <b>Slc39a7</b>                                                         | solute carrier family 39 (zinc transporter), member 7                                                             | 0006810 // transport // inferred from electronic annotation//0006811 // ion transport /     |
| NM_019673    | //XM        | 0.029 |       |       | -1.04  | -1.08  | 1.15   | 1.06   | <b>Actl6a</b>                                                          | actin-like 6A                                                                                                     | 0003407 // neural retina development // inferred from electronic annotation//0006281        |
| NM_019656    | 0.006       |       |       |       | -1.00  | -1.05  | 1.15   | 1.02   | <b>Tspan6</b>                                                          | tetraspanin 6                                                                                                     | 0007165 // signal transduction // ---//0007165 // signal transduction // inferred from el   |
| NM_144835    | 0.007       |       |       |       | -1.05  | 1.12   | 1.15   | -1.04  | <b>Heatr1</b>                                                          | HEAT repeat containing 1                                                                                          | 0000462 // maturation of SSU-rRNA from tricistronic rRNA transcript (SSU-rRNA, 5.8S rR      |
| NM_001291134 | //NM_00     | 0.009 |       |       | 1.04   | 1.12   | 1.15   | 1.23   | <b>Rprd1b</b>                                                          | regulation of nuclear pre-mRNA domain containing 1B                                                               | 0006351 // transcription, DNA-templated // inferred from electronic annotation//00063       |
| NM_0259      | 0.0015      |       |       |       | -1.07  | 1.22   | 1.15   | 1.04   | <b>Rpl11</b>                                                           | ribosomal protein L11                                                                                             | 0000027 // ribosomal large subunit assembly // ---//0006364 // rRNA processing // not i     |
| NM_1453      | 0.0189      | 0.035 |       |       | -1.05  | 1.18   | 1.15   | 1.00   | <b>Nsun2</b>                                                           | NOL1/NOP2/Sun domain family member 2                                                                              | 0007049 // cell cycle // inferred from electronic annotation//0007067 // mitotic nuclear    |
| NM_0076      | 0.0226      | 0.021 |       |       | -1.18  | 1.03   | 1.15   | 1.08   | <b>Cct5</b>                                                            | chaperonin containing Tcp1, subunit 5 (epsilon)                                                                   | 0006457 // protein folding // inferred from electronic annotation//0007339 // binding c     |
| NM_025387    | //XM        | 0.006 |       |       | -1.07  | 1.07   | 1.15   | 1.20   | <b>Gm4246</b> // <b>Tmem14c</b>                                        | predicted gene 4246//transmembrane protein 14C                                                                    | 0006783 // heme biosynthetic process // inferred from electronic annotation//0006839        |

| RefSeq       | Tri          | p 24h  | p 48h | p 72h | FD Air | FD 24h | FD 48h | FD 72h | Gene Symbol                     | Gene Title                                                                                   | Gene Ontology Biological Process                                                           |
|--------------|--------------|--------|-------|-------|--------|--------|--------|--------|---------------------------------|----------------------------------------------------------------------------------------------|--------------------------------------------------------------------------------------------|
| NM_0011      |              | 0.002  |       |       | -1.00  | 1.25   | 1.15   | 1.18   | <i>Rnh1</i>                     | ribonuclease/angiogenin inhibitor 1                                                          | 0043086 // negative regulation of catalytic activity // not recorded//0045765 // regulati  |
| NM_0011      |              | 0.0097 | 0.018 |       | -1.12  | 1.18   | 1.15   | 1.18   | <i>Kars</i>                     | lysyl-tRNA synthetase                                                                        | 0006412 // translation // inferred from electronic annotation//0006418 // tRNA aminoa      |
| NM_0808      |              | 0.0368 |       |       | -1.03  | 1.16   | 1.15   | -1.02  | <i>Mydgf</i>                    | myeloid derived growth factor                                                                | 0001525 // angiogenesis // inferred from electronic annotation//0001934 // positive reg    |
| NM_001313906 | ///NM_00     | 0.029  |       |       | -1.11  | 1.02   | 1.15   | 1.36   | <i>Prmt5</i>                    | protein arginine N-methyltransferase 5                                                       | 0000122 // negative regulation of transcription from RNA polymerase II promoter // infer   |
| NM_0089      |              | 0.0264 | 0.009 |       | -1.08  | -1.01  | 1.15   | 1.06   | <i>Prmt1</i>                    | DNA primase, p49 subunit                                                                     | 0006260 // DNA replication // inferred from electronic annotation//0006269 // DNA rep      |
| NM_0258      |              | 0.0341 |       |       | -1.04  | 1.08   | 1.15   | 1.11   | <i>Tax1bp1</i>                  | Tax1 (human T cell leukemia virus type I) binding protein 1                                  | 0006915 // apoptotic process // inferred from electronic annotation//0032088 // negati     |
| NM_021457    |              | 0.002  |       |       | -1.01  | 1.05   | 1.16   | 1.16   | <i>Fzd1</i>                     | frizzled homolog 1 (Drosophila)                                                              | 0001934 // positive regulation of protein phosphorylation // inferred from mutant phen     |
| NM_145630    |              | 0.031  |       |       | -1.05  | 1.01   | 1.16   | 1.07   | <i>Pdk3</i>                     | pyruvate dehydrogenase kinase, isoenzyme 3                                                   | 0005975 // carbohydrate metabolic process // inferred from electronic annotation//000      |
| NM_0258      | #####        |        |       |       | -1.18  | -2.54  | 1.16   | -1.08  | <i>Chordc1</i>                  | cysteine and histidine-rich domain (CHORD)-containing, zinc-binding protein 1                | 0010824 // regulation of centrosome duplication // inferred from mutant phenotype//00      |
| NM_026234    |              |        | 0.038 |       | 1.16   | 1.02   | 1.16   | -1.06  | <i>Pigm</i>                     | phosphatidylinositol glycan anchor biosynthesis, class M                                     | 0006506 // GPI anchor biosynthetic process // not recorded//0097502 // mannosylate         |
| NM_0110      |              | 0.0083 |       |       | -1.02  | -1.57  | 1.16   | -1.17  | <i>Pigo</i>                     | phosphatidylinositol glycan anchor biosynthesis, class A                                     | 0006506 // GPI anchor biosynthetic process // inferred from mutant phenotype//00090        |
| NM_025820    |              | 0.01   |       |       | 1.02   | 1.12   | 1.16   | 1.08   | <i>Crnk1</i>                    | Crn, crooked neck-like 1 (Drosophila)                                                        | 0000245 // spliceosomal complex assembly // not recorded//0000398 // mRNA splicing,        |
| NM_001136086 | ///          | 0.024  |       |       | -1.08  | -1.07  | 1.16   | 1.10   | <i>Dpysl3</i>                   | dihydropyrimidinase-like 3                                                                   | 0007399 // nervous system development // inferred from direct assay//0008152 // met:       |
| NM_0254      |              | 0.0086 |       |       | -1.08  | 1.04   | 1.16   | 1.13   | <i>Mrps14</i>                   | mitochondrial ribosomal protein S14                                                          | 0006412 // translation // not recorded                                                     |
| NM_001277309 | ///          | 0.036  |       |       | -1.06  | -1.00  | 1.16   | 1.08   | <i>Mea1</i>                     | male enhanced antigen 1                                                                      | 0007275 // multicellular organismal development // inferred from electronic annotation/    |
| NM_172410    | ///XXM       | 0.031  |       |       | 1.02   | 1.13   | 1.16   | 1.20   | <i>Nup93</i>                    | nucleoporin 93                                                                               | 0002230 // positive regulation of defense response to virus by host // not recorded//000   |
| NM_0107      |              | 0.0281 |       |       | -1.01  | 1.10   | 1.16   | 1.03   | <i>Lmnb1</i>                    | lamin B1                                                                                     | 0031662 // positive regulation of cyclin-dependent protein serine/threonine kinase activ   |
| NM_0010      |              | 0.0055 |       |       | 1.01   | 1.19   | 1.16   | 1.22   | <i>Capz2</i>                    | capping protein (actin filament) muscle Z-line, beta                                         | 0000902 // cell morphogenesis // not recorded//0007010 // cytoskeleton organization /      |
| NM_026141    | ///XXM       | 0.024  | 0.016 |       | -1.11  | 1.02   | 1.16   | 1.20   | <i>Ppil4</i>                    | peptidylprolyl isomerase (cyclophilin)-like 4                                                | 0000413 // protein peptidyl-prolyl isomerization // not recorded//0006457 // protein fo    |
| NM_0260      |              | 0.0262 | 0.027 |       | -1.10  | 1.06   | 1.16   | -1.06  | <i>Cmtm6</i>                    | CKLF-like MARVEL transmembrane domain containing 6                                           | 0006935 // chemotaxis // inferred from electronic annotation                               |
| NM_183106    | ///XXM       | 0.014  |       |       | -1.02  | 1.06   | 1.16   | 1.07   | <i>Ttc17</i>                    | tetratricopeptide repeat domain 17                                                           | 0030030 // cell projection organization // inferred from electronic annotation//0030041    |
| NM_001164677 | ///          | 0.004  |       |       | 1.04   | 1.02   | 1.16   | 1.04   | <i>Pdcd6ip</i>                  | programmed cell death 6 interacting protein                                                  | 0000920 // cell separation after cytokinesis // not recorded//0006810 // transport // inf  |
| NM_0081      |              | 0.0163 |       |       | 1.04   | -1.11  | 1.16   | 1.48   | <i>Gstm2</i>                    | glutathione S-transferase, mu 2                                                              | 0006749 // glutathione metabolic process // not recorded//0008152 // metabolic proce       |
| NM_0012      |              | 0.0023 | 0.041 |       | 1.01   | 1.21   | 1.16   | 1.08   | <i>Gabpb1</i>                   | GA repeat binding protein, beta 1                                                            | 0006351 // transcription, DNA-templated // inferred from electronic annotation//00063      |
| NM_001277266 | ///          | 0.05   |       |       | -1.05  | 1.09   | 1.16   | 1.15   | <i>Adam17</i>                   | a disintegrin and metalloproteinase domain 17                                                | 0001666 // response to hypoxia // not recorded//0001934 // positive regulation of prot     |
| NM_008948    |              | 0.003  |       |       | -1.09  | 1.05   | 1.16   | 1.17   | <i>Psmc3</i>                    | proteasome (prosome, macropain) 26S subunit, ATPase 3                                        | 0001824 // blastocyst development // inferred from mutant phenotype//0030163 // prc        |
| NM_0119      | #####        |        |       |       | -1.01  | 1.32   | 1.16   | 1.04   | <i>Tlr2</i>                     | toll-like receptor 2                                                                         | 0001774 // microglial cell activation // not recorded//0002224 // toll-like receptor signa |
| NM_0013      |              | 0.0082 | 0.045 |       | -1.05  | 1.14   | 1.16   | 1.06   | <i>Rps27l</i>                   | ribosomal protein S27-like                                                                   | 0000028 // ribosomal small subunit assembly // ---//0006281 // DNA repair // not recor     |
| NM_001038612 | ///          | 0.003  |       |       | -1.02  | 1.03   | 1.16   | 1.05   | <i>Olfm1</i>                    | olfactomedin 1                                                                               | 0003190 // atrioventricular valve formation // inferred from sequence or structural simil  |
| NM_0206      |              | 0.013  | 0.037 |       | -1.08  | 1.06   | 1.16   | 1.18   | <i>Smarca1</i>                  | SWI/SNF related, matrix associated, actin dependent regulator of chromatin, subfamih         | 0006337 // nucleosome disassembly // not recorded//0006338 // chromatin remodeling         |
| NM_025828    |              | 0.012  |       |       | -1.08  | -1.02  | 1.16   | 1.09   | <i>Lman2</i>                    | lectin, mannose-binding 2                                                                    | 0006810 // transport // inferred from electronic annotation//0006890 // retrograde ves     |
| NM_025679    |              | 0.034  |       |       | 1.04   | 1.04   | 1.16   | 1.04   | <i>Sike1</i>                    | suppressor of IKBKE 1                                                                        |                                                                                            |
| NM_013492    | ///XXM       | 0.005  | 0.003 |       | -1.10  | 1.02   | 1.17   | 1.33   | <i>Clu</i>                      | clusterin                                                                                    | 0000902 // cell morphogenesis // not recorded//0001774 // microglial cell activation //    |
| NM_008303    |              | 0.031  |       |       | -1.47  | -1.56  | 1.17   | -1.23  | <i>Hspe1</i>                    | heat shock protein 1 (chaperonin 10)                                                         | 0001649 // osteoblast differentiation // not recorded//0006457 // protein folding // inf   |
| NM_0206      |              | 0.0028 |       |       | 1.03   | 1.28   | 1.17   | 1.07   | <i>Taf1b</i>                    | TATA box binding protein (Tbp)-associated factor, RNA polymerase I, B                        | 0001189 // RNA polymerase I transcriptional preinitiation complex assembly at the prom     |
| NM_0081      |              | 0.043  |       |       | 1.26   | 1.47   | 1.17   | 1.23   | <i>H1f0</i>                     | H1 histone family, member 0                                                                  | 0006334 // nucleosome assembly // inferred from electronic annotation                      |
| NM_0119      |              | 0.0091 |       |       | 1.13   | 1.46   | 1.17   | 1.00   | <i>Nubp1</i>                    | nucleotide binding protein 1                                                                 | 0006879 // cellular iron ion homeostasis // not recorded//0010826 // negative regulati     |
| NM_001316716 | ///          | 0.023  |       |       | -1.02  | -1.15  | 1.17   | 1.20   | <i>Ddo</i>                      | D-aspartate oxidase                                                                          | 0006531 // aspartate metabolic process // inferred from mutant phenotype//0006533 //       |
| NM_133653    | ///XXM_00651 | 0.037  |       |       | 1.03   | 1.11   | 1.17   | 1.31   | <i>Mat1a</i>                    | methionine adenosyltransferase I, alpha                                                      | 0006556 // S-adenosylmethionine biosynthetic process // not recorded//0006730 // ont       |
| NM_008434    | ///XXM       | 0.026  |       |       | -1.01  | 1.05   | 1.17   | 1.03   | <i>Kcna1</i>                    | potassium voltage-gated channel, subfamily Q, member 1                                       | 0002230 // positive regulation of defense response to virus by host // not recorded//000   |
| NM_0011      |              | 0.0266 |       |       | 1.07   | 1.37   | 1.17   | 1.21   | <i>Lgals3</i>                   | lectin, galactose binding, soluble 3                                                         | 0001501 // skeletal system development // inferred from genetic interaction//0002376 ,     |
| NM_031256    | ///XXM       | 0.025  |       |       | -1.01  | 1.00   | 1.17   | -1.08  | <i>Plekha3</i>                  | pleckstrin homology domain-containing, family A (phosphoinositide binding specific) member 3 |                                                                                            |
| NM_001313906 | ///          | 0.003  |       |       | -1.11  | 1.02   | 1.17   | 1.36   | <i>Prmt5</i>                    | protein arginine N-methyltransferase 5                                                       | 0000122 // negative regulation of transcription from RNA polymerase II promoter // infer   |
| NM_0261      |              | 0.0298 |       |       | -1.04  | 1.05   | 1.17   | 1.04   | <i>Med4</i>                     | mediator complex subunit 4                                                                   | 0006351 // transcription, DNA-templated // inferred from electronic annotation//00063      |
| NM_016752    | ///XXM       | 0.015  |       |       | -1.21  | 1.04   | 1.17   | 1.13   | <i>Slc35b1</i>                  | solute carrier family 35, member B1                                                          | 0006810 // transport // inferred from electronic annotation//0008643 // carbohydrate t     |
| NM_0218      |              | 0.0019 |       |       | 1.06   | 1.38   | 1.17   | 1.11   | <i>Fads3</i>                    | fatty acid desaturase 3                                                                      | 0006629 // lipid metabolic process // inferred from electronic annotation//0006631 // f.   |
| NM_0223      | #####        |        |       |       | -1.08  | 1.28   | 1.17   | 1.06   | <i>Ctsz</i>                     | cathepsin Z                                                                                  | 0006508 // proteolysis // inferred from electronic annotation//0051603 // proteolysis in   |
| NM_1535      | #####        | 0.011  | 0.013 |       | -1.17  | 1.15   | 1.17   | -1.10  | <i>Pilra</i>                    | paired immunoglobulin-like type 2 receptor alpha                                             | 0007165 // signal transduction // not recorded//0007169 // transmembrane receptor pi       |
| NM_008569    | ///XXM       | 0.035  |       |       | 1.05   | 1.07   | 1.17   | 1.11   | <i>Anapc1</i>                   | anaphase promoting complex subunit 1                                                         | 0007049 // cell cycle // inferred from electronic annotation//0007067 // mitotic nuclear   |
| NM_011192    | ///XXM       | 0.025  |       |       | 1.04   | 1.14   | 1.17   | 1.12   | <i>Psme3</i>                    | proteasome (prosome, macropain) activator subunit 3 (PA28 gamma, Ki)                         | 0002479 // antigen processing and presentation of exogenous peptide antigen via MHC c      |
| NM_0013      |              | 0.011  |       |       | 1.02   | 1.78   | 1.17   | -1.01  | <i>Il6</i>                      | interleukin 6                                                                                | 0001781 // neutrophil apoptotic process // inferred from direct assay//0001781 // neut     |
| NM_0275      |              | 0.0108 |       |       | 1.06   | 1.30   | 1.17   | 1.05   | <i>P2ry12</i>                   | purinergic receptor P2Y, G-protein coupled 12                                                | 0001973 // adenosine receptor signaling pathway // not recorded//0006930 // substrat       |
| NM_0010      |              | 0.0316 |       |       | 1.11   | 1.76   | 1.17   | -1.08  | <i>Fam65b</i>                   | family with sequence similarity 65, member B                                                 | 0007605 // sensory perception of sound // not recorded                                     |
| NM_0103      |              | 0.0371 |       |       | -1.01  | 1.16   | 1.17   | 1.03   | <i>Emb</i>                      | embigin                                                                                      | 0007155 // cell adhesion // not recorded//0035879 // plasma membrane lactate transp        |
| NM_011937    | ///NR_028061 | 0.031  |       |       | -1.06  | 1.11   | 1.17   | 1.15   | <i>Gm8615</i> ///Gnpd1          | glucosamine-6-phosphate deaminase 1 pseudogene//glucosamine-6-phosphate deam                 | 0005975 // carbohydrate metabolic process // inferred from electronic annotation//000      |
| NM_010887    |              | 0.034  |       |       | 1.01   | 1.01   | 1.17   | 1.04   | <i>Ndufs4</i>                   | NADH dehydrogenase (ubiquinone) Fe-S protein 4                                               | 0001932 // regulation of protein phosphorylation // not recorded//0006810 // transpor      |
| NM_0083      |              | 0.0382 |       |       | -1.03  | 1.72   | 1.17   | 1.02   | <i>Il1b</i>                     | interleukin 1 beta                                                                           | 0000122 // negative regulation of transcription from RNA polymerase II promoter // not r   |
| NM_001039718 | ///          | 0.01   |       |       | 1.03   | 1.12   | 1.18   | -1.01  | <i>Cntf</i> ///Zfp91//Zfp91Cntf | ciliary neurotrophic factor//zinc finger protein 91//Zfp91-Cntf readthrough transcrip        | 0007250 // activation of NF-kappaB-inducing kinase activity // not recorded//0007259 /     |
| NM_001291448 | ///          | 0.038  |       |       | 1.01   | 1.08   | 1.18   | -1.00  | <i>Foxred1</i>                  | FAD-dependent oxidoreductase domain containing 1                                             | 0006810 // transport // inferred from electronic annotation//0032981 // mitochondrial      |
| NM_026423    | ///XXM_00653 | 0.013  |       |       | 1.18   | 1.20   | 1.18   | -1.23  | <i>Mri1</i>                     | methylthioribose-1-phosphate isomerase homolog (S. cerevisiae)                               | 0008652 // cellular amino acid biosynthetic process // inferred from electronic annotatio  |
| NM_0258      |              | 0.0205 | 0.004 |       | -1.12  | 1.10   | 1.18   | 1.14   | <i>Psm12</i>                    | proteasome (prosome, macropain) 26S subunit, non-ATPase, 12                                  | 0043161 // proteasome-mediated ubiquitin-dependent protein catabolic process // not r      |
| NM_001252332 | ///          | 0.033  |       |       | 1.05   | 1.02   | 1.18   | 1.16   | <i>8-Sep</i>                    | septin 8                                                                                     |                                                                                            |
| NM_027994    |              | 0.045  |       |       | -1.07  | 1.02   | 1.18   | 1.26   | <i>Cand1</i>                    | cullin associated and neddylation disassociated 1                                            | 0010265 // SCF complex assembly // not recorded//0016567 // protein ubiquitination //      |
| NM_0119      |              | 0.0484 |       |       | -1.03  | 1.17   | 1.18   | -1.01  | <i>Psm1</i>                     | proteasome (prosome, macropain) subunit, alpha type 1                                        | 0002376 // immune system process // inferred from electronic annotation//0002862 //        |

| RefSeq       | Tri         | p 24h | p 48h | p 72h | FD Air | FD 24h | FD 48h | FD 72h | Gene Symbol                                | Gene Title                                                                         | Gene Ontology Biological Process                                                          |
|--------------|-------------|-------|-------|-------|--------|--------|--------|--------|--------------------------------------------|------------------------------------------------------------------------------------|-------------------------------------------------------------------------------------------|
| NM_144902    | ///XM       | 0.012 |       |       | -1.01  | 1.04   | 1.18   | 1.02   | <i>Slc35a3</i>                             | solute carrier family 35 (UDP-N-acetylglucosamine (UDP-GlcNAc) transporter), membe | 0006810 // transport // inferred from electronic annotation///0008643 // carbohydrate     |
| NM_0012      | 0.032       |       |       |       | 1.11   | -1.28  | 1.18   | 1.06   | <i>Nnat</i>                                | neuronatin                                                                         | 0007275 // multicellular organismal development // inferred from electronic annotation/   |
| NM_001253700 | ///         | 0.034 | 0.04  |       | -1.03  | 1.06   | 1.18   | 1.25   | <i>Elp5</i>                                | elongator acetyltransferase complex subunit 5                                      | 0006351 // transcription, DNA-templated // inferred from electronic annotation///00063    |
| NM_0012      | 0.0193      | 0.023 | 0.025 |       | -1.10  | 1.10   | 1.18   | 1.09   | <i>Txndc5</i>                              | thioredoxin domain containing 5                                                    | 0006457 // protein folding // not recorded///0008152 // metabolic process // inferred fr  |
| NM_0012      | 0.0066      |       |       |       | 1.01   | 1.24   | 1.18   | 1.14   | <i>Casp3</i>                               | caspase 3                                                                          | 0001666 // response to hypoxia // inferred from electronic annotation///0001782 // B ce   |
| NM_026913    | ///XM       | 0.008 |       |       | -1.06  | 1.06   | 1.18   | 1.11   | <i>Mitd1</i>                               | MIT, microtubule interacting and transport, domain containing 1                    | 0000281 // mitotic cytokinesis // not recorded///0000920 // cell separation after cyto    |
| NM_133933    | ///         | 0.013 |       |       | -1.17  | -1.06  | 1.18   | -1.12  | <i>Rpn1</i>                                | ribophorin I                                                                       | 0006486 // protein glycosylation // inferred from electronic annotation///0018279 // prc  |
| NM_1531      | 0.0429      |       |       |       | 1.23   | 1.63   | 1.18   | 1.04   | <i>Gimap6</i>                              | GTPase, IMAP family member 6                                                       |                                                                                           |
| NM_183225    | ///XM       | 0.011 |       |       | 1.01   | 1.06   | 1.18   | 1.10   | <i>Usp24</i>                               | ubiquitin specific peptidase 24                                                    | 0006508 // proteolysis // inferred from electronic annotation///0006511 // ubiquitin-dep  |
| NM_001008497 | ///NM_00    | 0.028 |       |       | -1.04  | 1.05   | 1.18   | 1.16   | <i>P2ry14</i>                              | purinergic receptor P2Y, G-protein coupled, 14                                     | 0006955 // immune response // not recorded///0007165 // signal transduction // inferre    |
| NM_0012      | 0.0033      |       |       |       | -1.04  | 1.45   | 1.18   | 1.12   | <i>Cd84</i>                                | CD84 antigen                                                                       | 0007155 // cell adhesion // inferred from electronic annotation                           |
| NM_0169      | 0.0264      |       |       |       | 1.04   | 1.23   | 1.18   | 1.08   | <i>Sec61a1</i>                             | Sec61 alpha 1 subunit (S. cerevisiae)                                              | 0006614 // SRP-dependent cotranslational protein targeting to membrane // not recorde     |
| NM_0010      | 0.0278      |       |       |       | 1.00   | 1.10   | 1.18   | 1.15   | <i>Pdxdc1</i>                              | pyridoxal-dependent decarboxylase domain containing 1                              | 0019752 // carboxylic acid metabolic process // inferred from electronic annotation       |
| NM_001290368 | ///         | 0.029 |       |       | 1.00   | -1.03  | 1.18   | 1.12   | <i>Nmt2</i>                                | N-myristoyltransferase 2                                                           | 0006499 // N-terminal protein myristoylation // traceable author statement///0018008 //   |
| NM_001164197 | ///         | 0.01  |       |       | -1.08  | -1.03  | 1.18   | 1.03   | <i>Mmp19</i>                               | matrix metalloproteinase 19                                                        | 0001525 // angiogenesis // inferred from electronic annotation///0001541 // ovarian foll  |
| NM_1339      | 0.0389      |       |       |       | -1.03  | 1.13   | 1.18   | 1.00   | <i>Lsm8</i>                                | LSM8 homolog, U6 small nuclear RNA associated (S. cerevisiae)                      | 0000398 // mRNA splicing, via spliceosome // not recorded///0006397 // mRNA processi      |
| NM_0079      | 0.0412      |       |       |       | -1.01  | 1.21   | 1.18   | 1.00   | <i>Fbl</i> ///LOC102643269                 | fibrillarin///rRNA 2'-O-methyltransferase fibrillarin                              | 0000494 // box C/D snoRNA 3'-end processing // not recorded///0001649 // osteoblast c     |
| NM_0135      | 0.0155      | 0.04  |       |       | -1.07  | 1.12   | 1.18   | 1.21   | <i>Emg1</i>                                | EMG1 nucleolar protein homolog (S. cerevisiae)                                     | 0001824 // blastocyst development // inferred from mutant phenotype///0006364 // rRi      |
| NM_0010      | 0.0051      |       |       |       | 1.04   | 1.53   | 1.18   | 1.20   | <i>Gm10052</i> ///Gm5643///Gm5803///Hnrnpa | heterogeneous nuclear ribonucleoprotein A1 pseudogene///predicted gene 5803///he   | 0000380 // alternative mRNA splicing, via spliceosome // inferred from direct assay///00  |
| NM_0260      | 0.0485      | 0.042 |       |       | -1.01  | 1.13   | 1.18   | 1.15   | <i>Med31</i>                               | mediator complex subunit 31                                                        | 0006351 // transcription, DNA-templated // inferred from electronic annotation///00063    |
| NM_001314041 | ///         | 0.002 | 0.049 |       | -1.08  | 1.03   | 1.18   | 1.21   | <i>Itga5</i>                               | integrin alpha 5 (fibronectin receptor alpha)                                      | 0007044 // cell-substrate junction assembly // inferred from direct assay///0007155 // ce |
| NM_013625    | ///NR       | 0.046 |       |       | -1.02  | 1.08   | 1.18   | 1.11   | <i>Pafah1b1</i>                            | platelet-activating factor acetylhydrolase, isoform 1b, subunit 1                  | 0000132 // establishment of mitotic spindle orientation // not recorded///0000226 // pi   |
| NM_0113      | 0.0093      |       |       |       | -1.04  | 1.26   | 1.18   | 1.09   | <i>Gm7285</i> ///Rps7                      | predicted gene 7285///ribosomal protein S7                                         | 0001843 // neural tube closure // inferred from mutant phenotype///0006364 // rRNA p      |
| NM_0012      | 0.0423      | 0.007 | 0.002 |       | -1.01  | 1.22   | 1.18   | 1.18   | <i>Clip4</i>                               | CAP-GLY domain containing linker protein family, member 4                          |                                                                                           |
| NM_1722      | 0.0014      | 0.026 |       |       | -1.05  | 1.18   | 1.18   | 1.07   | <i>Eif2b5</i>                              | eukaryotic translation initiation factor 2B, subunit 5 epsilon                     | 0001541 // ovarian follicle development // not recorded///0006412 // translation // infe  |
| NM_001204165 | ///         | 0.043 |       |       | 1.00   | -1.05  | 1.18   | 1.28   | <i>Rapgef4</i>                             | Rap guanine nucleotide exchange factor (GEF) 4                                     | 0001932 // regulation of protein phosphorylation // inferred from electronic annotation/  |
| NM_0098      | #####       |       |       |       | 1.04   | 2.32   | 1.18   | -1.02  | <i>Ch25h</i>                               | cholesterol 25-hydroxylase                                                         | 0006629 // lipid metabolic process // inferred from electronic annotation///0006633 // f. |
| NM_0011      | 0.0031      |       |       |       | 1.36   | -1.13  | 1.18   | 1.61   | <i>Pfkfb3</i>                              | 6-phosphofructo-2-kinase/fructose-2,6-bisphosphatase 3                             | 0006000 // fructose metabolic process // inferred from electronic annotation///0006003    |
| NM_0079      | 0.0332      |       |       |       | 1.00   | 1.16   | 1.19   | 1.09   | <i>Aimp1</i>                               | aminoacyl tRNA synthetase complex-interacting multifunctional protein 1            | 0001525 // angiogenesis // inferred from electronic annotation///0001937 // negative re   |
| NM_0011      | 0.0043      |       |       |       | 1.01   | 1.11   | 1.19   | 1.26   | <i>Rnf14</i>                               | ring finger protein 14                                                             | 0000209 // protein polyubiquitination // not recorded///0006351 // transcription, DNA-t   |
| NM_0013      | 0.0088      |       |       |       | -1.05  | 1.57   | 1.19   | 1.14   | <i>Arhgdib</i>                             | Rho, GDP dissociation inhibitor (GDI) beta                                         | 0008152 // metabolic process // inferred from electronic annotation///0043547 // positi   |
| NM_008775    | ///XM       | 0.019 |       |       | -1.06  | 1.00   | 1.19   | 1.08   | <i>Pafah1b2</i>                            | platelet-activating factor acetylhydrolase, isoform 1b, subunit 2                  | 0006629 // lipid metabolic process // inferred from electronic annotation///0006928 // n  |
| NM_018856    | ///NM_20767 | 0.039 |       |       | 1.23   | 1.10   | 1.19   | 1.11   | <i>Ccnl2</i>                               | cyclin L2                                                                          | 0000079 // regulation of cyclin-dependent protein serine/threonine kinase activity // inf |
| NM_007743    | 0.039       |       |       |       | -1.26  | -1.12  | 1.19   | 1.01   | <i>Col1a2</i>                              | collagen, type I, alpha 2                                                          | 0001501 // skeletal system development // not recorded///0001568 // blood vessel deve     |
| NM_011809    |             | 0.042 |       |       | 1.17   | 1.13   | 1.19   | 1.07   | <i>Ets2</i>                                | E26 avian leukemia oncogene 2, 3' domain                                           | 0000122 // negative regulation of transcription from RNA polymerase II promoter // not i  |
| NM_001159908 | ///         | 0.018 |       |       | 1.05   | -1.05  | 1.19   | 1.09   | <i>Zfand2a</i>                             | zinc finger, ANK1-type domain 2A                                                   | 0032436 // positive regulation of proteasomal ubiquitin-dependent protein catabolic pr    |
| NM_0084      | 0.0016      |       |       |       | 1.26   | 1.90   | 1.19   | 1.03   | <i>Junb</i>                                | jun B proto-oncogene                                                               | 0000122 // negative regulation of transcription from RNA polymerase II promoter // not i  |
| NM_008065    | ///XM       | 0.018 | 0.018 |       | -1.02  | 1.03   | 1.19   | 1.14   | <i>Gabpa</i>                               | GA repeat binding protein, alpha                                                   | 0000122 // negative regulation of transcription from RNA polymerase II promoter // infer  |
| NM_0194      | 0.0402      |       |       |       | 1.03   | 1.23   | 1.19   | 1.19   | <i>Myo10</i>                               | myosin X                                                                           | 0006810 // transport // inferred from electronic annotation///0007165 // signal transdu   |
| NM_153774    | ///XM       | 0.005 | 0.039 |       | -1.15  | -1.03  | 1.19   | 1.14   | <i>Ipo9</i>                                | importin 9                                                                         | 0006606 // protein import into nucleus // inferred from direct assay///0006610 // riboso  |
| NM_0011      | 0.0011      |       |       |       | -1.23  | -2.44  | 1.19   | -1.16  | <i>Dnaja1</i>                              | Dnaj (Hsp40) homolog, subfamily A, member 1                                        | 0006457 // protein folding // inferred from electronic annotation///0007283 // spermatc   |
| NM_0109      | 0.0257      | 0.041 |       |       | -1.02  | 1.20   | 1.19   | 1.01   | <i>Mrpl40</i>                              | mitochondrial ribosomal protein L40                                                |                                                                                           |
| NM_0075      | 0.0311      |       |       |       | -1.01  | 1.22   | 1.19   | -1.04  | <i>Atp1b3</i>                              | ATPase, Na <sup>+</sup> /K <sup>+</sup> transporting, beta 3 polypeptide           | 0006810 // transport // inferred from electronic annotation///0006811 // ion transport /  |
| NM_0119      | 0.0135      |       |       |       | 1.03   | 1.18   | 1.19   | 1.10   | <i>Cops3</i>                               | COP9 (constitutive photomorphogenic) homolog, subunit 3 (Arabidopsis thaliana)     | 0001701 // in utero embryonic development // inferred from mutant phenotype///0006:       |
| NM_1455      | 0.0196      |       |       |       | -1.04  | 1.20   | 1.19   | 1.08   | <i>Dars</i>                                | aspartyl-tRNA synthetase                                                           | 0006412 // translation // inferred from electronic annotation///0006418 // tRNA aminoa    |
| NM_0012      | #####       | 0.041 | 0.002 |       | -1.19  | 1.13   | 1.19   | 1.09   | <i>Asnsd1</i>                              | asparagine synthetase domain containing 1                                          | 0006529 // asparagine biosynthetic process // not recorded///0006541 // glutamine det     |
| NM_0012      | 0.0022      |       |       |       | 1.00   | 1.24   | 1.19   | -1.05  | <i>Psmg1</i>                               | proteasome (prosome, macropain) subunit, alpha type 7                              | 0006508 // proteolysis // inferred from electronic annotation///0006511 // ubiquitin-det  |
| NM_172924    | ///XM       | 0.02  |       |       | 1.06   | 1.09   | 1.19   | -1.05  | <i>Peak1</i>                               | pseudopodium-enriched atypical kinase 1                                            | 0006468 // protein phosphorylation // not recorded///0016310 // phosphorylation // inf    |
| NM_0010      | 0.05        |       |       |       | 1.04   | 1.31   | 1.19   | 1.09   | <i>Adar</i>                                | adenosine deaminase, RNA-specific                                                  | 0001649 // osteoblast differentiation // inferred from mutant phenotype///0001701 // ir   |
| NM_009763    | ///XM       | 0.009 | 0.003 |       | -1.22  | 1.02   | 1.19   | 1.08   | <i>Bst1</i>                                | bone marrow stromal cell antigen 1                                                 | 0008152 // metabolic process // not recorded///0030890 // positive regulation of B ce     |
| NM_001080932 | ///         | 0.004 |       |       | -1.05  | -1.09  | 1.19   | 1.11   | <i>Foxk2</i>                               | forkhead box K2                                                                    | 0006351 // transcription, DNA-templated // inferred from electronic annotation///00063    |
| NM_0010      | #####       | 0.004 |       |       | -1.06  | 1.11   | 1.19   | 1.34   | <i>Banf1</i>                               | barrier to autointegration factor 1                                                | 0015074 // DNA integration // inferred from direct assay///0075713 // establishment of i  |
| NM_145512    | 0.02        |       |       |       | 1.02   | 1.06   | 1.19   | 1.04   | <i>Sft2d2</i>                              | SFT2 domain containing 2                                                           | 0006810 // transport // inferred from electronic annotation///0015031 // protein transp   |
| NM_007898    | 0.017       |       |       |       | 1.04   | 1.07   | 1.19   | 1.09   | <i>Ebp</i>                                 | phenylalkylamine Ca2+ antagonist (emopamil) binding protein                        | 0006629 // lipid metabolic process // inferred from electronic annotation///0006694 // s  |
| NM_0013      | 0.0189      |       |       |       | -1.20  | 1.29   | 1.19   | 1.05   | <i>Alox5ap</i>                             | arachidonate 5-lipoxygenase activating protein                                     | 0002540 // leukotriene production involved in inflammatory response // inferred from m    |
| NM_019833    | ///XM       | 0.031 |       |       | 1.04   | 1.05   | 1.20   | 1.13   | <i>Fam69b</i>                              | family with sequence similarity 69, member B                                       |                                                                                           |
| NM_026667    | 0.044       |       |       |       | -1.04  | -1.01  | 1.20   | 1.06   | <i>Fam114a1</i>                            | family with sequence similarity 114, member A1                                     |                                                                                           |
| NM_0012      | 0.0036      |       |       |       | 1.04   | 1.19   | 1.20   | 1.19   | <i>Dnajc5</i>                              | Dnaj (Hsp40) homolog, subfamily C, member 5                                        | 0043524 // negative regulation of neuron apoptotic process // inferred from genetic inte  |
| NM_0205      | 0.0433      |       |       |       | -1.13  | 1.05   | 1.20   | 1.02   | <i>Atp5j2</i>                              | ATP synthase, H+ transporting, mitochondrial FO complex, subunit F2                | 0006754 // ATP biosynthetic process // inferred from electronic annotation///0006810 //   |
| NM_134138    | ///XM       | 0.026 |       |       | 1.07   | 1.18   | 1.20   | 1.14   | <i>Psmg2</i>                               | proteasome (prosome, macropain) assembly chaperone 2                               | 0007094 // mitotic spindle assembly checkpoint // inferred from direct assay///0043066    |
| NM_001311790 | ///         | 0.032 | 0.036 |       | -1.12  | 1.09   | 1.20   | 1.14   | <i>Ctsc</i>                                | cathepsin C                                                                        | 0001913 // T cell mediated cytotoxicity // inferred from genetic interaction///0006508 // |
| NM_010485    | ///XM       | 0.033 | 0.015 |       | -1.07  | -1.02  | 1.20   | 1.15   | <i>Elavl1</i>                              | ELAV (embryonic lethal, abnormal vision)-like 1 (Hu antigen R)                     | 0006417 // regulation of translation // not recorded///0045727 // positive regulation of  |
| NM_008255    | ///XM       | 0.024 |       |       | 1.05   | 1.18   | 1.20   | 1.07   | <i>Hmgcr</i>                               | 3-hydroxy-3-methylglutaryl-Coenzyme A reductase                                    | 0006629 // lipid metabolic process // inferred from electronic annotation///0006694 // s  |
| NM_0114      | 0.0163      | 0.011 |       |       | -1.00  | 1.09   | 1.20   | 1.20   | <i>LOC100862468</i> ///Nhp211              | NHP2-like protein 1///NHP2 non-histone chromosome protein 2-like 1 (S. cerevisiae) | 0006397 // mRNA processing // inferred from electronic annotation///0007338 // single     |

| RefSeq       | Tri    | p 24h    | p 48h | p 72h | FD Air | FD 24h | FD 48h | FD 72h | Gene Symbol                 | Gene Title                                                                                                                          | Gene Ontology Biological Process                                                             |
|--------------|--------|----------|-------|-------|--------|--------|--------|--------|-----------------------------|-------------------------------------------------------------------------------------------------------------------------------------|----------------------------------------------------------------------------------------------|
| NM_0116      | 0.0274 |          |       |       | 1.04   | 1.23   | 1.20   | 1.04   | <i>Ugcg</i>                 | UDP-glucose ceramide glucosyltransferase                                                                                            | 0006629 // lipid metabolic process // inferred from electronic annotation///0006665 // s     |
| NM_0306      | 0.0134 |          |       |       | 1.04   | 1.29   | 1.20   | -1.07  | <i>Serp1</i>                | stress-associated endoplasmic reticulum protein 1                                                                                   | 0001501 // skeletal system development // inferred from mutant phenotype///0006006           |
| NM_001080974 | ///    | 0.045    |       |       | -1.02  | 1.07   | 1.20   | 1.21   | <i>Sri</i>                  | sorcin                                                                                                                              | 0006508 // proteolysis // not recorded///0006816 // calcium ion transport // inferred fr     |
| NM_0011      | 0.0225 |          |       |       | 1.02   | 1.24   | 1.20   | 1.01   | <i>Hmbs</i>                 | hydroxymethylbilane synthase                                                                                                        | 0001666 // response to hypoxia // inferred from electronic annotation///0006779 // por       |
| NM_001289770 | ///    | 0.043    | 0.006 |       | -1.04  | 1.01   | 1.20   | 1.09   | <i>Exoc1</i>                | exocyst complex component 1                                                                                                         | 0006810 // transport // inferred from electronic annotation///0006887 // exocytosis // n     |
| NM_025664    |        | 0.018    |       |       | 1.00   | 1.15   | 1.20   | -1.02  | <i>Snx9</i>                 | sorting nexin 9                                                                                                                     | 0000281 // mitotic cytokinesis // not recorded///0006810 // transport // inferred from el    |
| NM_1451      | 0.0133 | 0.018    | 0.018 |       | -1.07  | 1.22   | 1.20   | 1.22   | <i>Lpcat3</i>               | lysophosphatidylcholine acyltransferase 3                                                                                           | 0006629 // lipid metabolic process // inferred from electronic annotation///0006644 // p     |
| NM_0010      | 0.0352 |          |       |       | 1.00   | 1.16   | 1.20   | 1.05   | <i>Trappc1</i>              | trafficking protein particle complex 1                                                                                              | 0006810 // transport // inferred from electronic annotation///0006888 // ER to Golgi ves     |
| NM_001111043 | ///    | 0.011    |       |       | -1.42  | -1.57  | 1.20   | 1.02   | <i>Serpinh1</i>             | serine (or cysteine) peptidase inhibitor, clade H, member 1                                                                         | 0003433 // chondrocyte development involved in endochondral bone morphogenesis //            |
| NM_019953    | ///XM  | 0.049    |       |       | 1.02   | 1.09   | 1.20   | 1.03   | <i>Cnpy2</i>                | canopy 2 homolog (zebrafish)                                                                                                        | 0010629 // negative regulation of gene expression // inferred from mutant phenotype//        |
| NM_011149    |        | 0.038    |       |       | -1.02  | 1.05   | 1.20   | 1.05   | <i>Ppib</i>                 | peptidylprolyl isomerase B                                                                                                          | 0000413 // protein peptidyl-prolyl isomerization // not recorded///0006457 // protein fo     |
| NM_0167      | 0.0022 | 0.04     |       |       | -1.08  | 1.10   | 1.20   | 1.14   | <i>Hsd17b10</i>             | hydroxysteroid (17-beta) dehydrogenase 10                                                                                           | 0007569 // cell aging // inferred from electronic annotation///0008033 // tRNA processir     |
| NM_0268      | 0.0066 |          |       |       | 1.03   | 1.25   | 1.20   | 1.23   | <i>Chmp2a</i>               | charged multivesicular body protein 2A                                                                                              | 0000920 // cell separation after cytokinesis // not recorded///0006810 // transport // inf   |
| NM_001037997 | ///    | 0.019    |       |       | 1.02   | 1.02   | 1.20   | -1.01  | <i>Fer</i>                  | fer (fms/fps related) protein kinase                                                                                                | 0000226 // microtubule cytoskeleton organization // not recorded///0000278 // mitotic        |
| NM_0255      | #####  |          |       |       | -1.09  | 1.09   | 1.20   | 1.21   | <i>Cyb5b</i>                | cytochrome b5 type B                                                                                                                | 0006810 // transport // inferred from electronic annotation///0043085 // positive regula     |
| NM_001166480 | ///    | 0.042    |       |       | -1.00  | 1.12   | 1.20   | 1.14   | <i>Ssr4</i>                 | signal sequence receptor, delta                                                                                                     |                                                                                              |
| NM_0083      | 0.0077 | 0.017    |       |       | -1.08  | 1.38   | 1.20   | 1.00   | <i>Itga7</i>                | integrin alpha 7                                                                                                                    | 0007155 // cell adhesion // inferred from mutant phenotype///0007155 // cell adhesion        |
| NM_176979    | ///XM  | 0.008    |       |       | -1.08  | 1.03   | 1.21   | 1.06   | <i>Topbp1</i>               | topoisomerase (DNA) II binding protein 1                                                                                            | 0006281 // DNA repair // inferred from electronic annotation///0006974 // cellular resp      |
| NM_1391      | 0.038  |          |       |       | -1.01  | 1.85   | 1.21   | 1.44   | <i>Plac8</i>                | placenta-specific 8                                                                                                                 | 0008284 // positive regulation of cell proliferation // inferred from direct assay///000940  |
| NM_001290725 | ///    | 0.044    |       |       | 1.03   | 1.04   | 1.21   | 1.18   | <i>Ppp1r8</i>               | protein phosphatase 1, regulatory (inhibitor) subunit 8                                                                             | 0006351 // transcription, DNA-templated // inferred from electronic annotation///00063       |
| NM_010481    |        | 0.045    |       |       | -1.00  | 1.07   | 1.21   | -1.06  | <i>Hspa9</i>                | heat shock protein 9                                                                                                                | 0006457 // protein folding // inferred from electronic annotation///0006611 // protein e     |
| NM_001136059 | ///    | 0.021    |       |       | -1.67  | -1.64  | 1.21   | -1.57  | <i>Cyp1a1</i>               | cytochrome P450, family 1, subfamily a, polypeptide 1                                                                               | 0001666 // response to hypoxia // inferred from electronic annotation///0001889 // livei     |
| NM_0116      | 0.0104 |          |       |       | -1.11  | 1.65   | 1.21   | -1.15  | <i>Tyropb</i>               | TYRO protein tyrosine kinase binding protein                                                                                        | 0002281 // macrophage activation involved in immune response // inferred from mutant         |
| NM_1340      | 0.0261 | 0.002    |       |       | -1.10  | 1.11   | 1.21   | -1.11  | <i>Kdelr3</i>               | KDEL (Lys-Asp-Glu-Leu) endoplasmic reticulum protein retention receptor 3                                                           | 0006621 // protein retention in ER lumen // inferred from electronic annotation///00068      |
| NM_0012      | 0.0351 | 0.002    |       |       | -1.08  | 1.05   | 1.21   | 1.04   | <i>Pus7</i>                 | pseudouridylate synthase 7 homolog (S. cerevisiae)                                                                                  | 0001522 // pseudouridine synthesis // inferred from electronic annotation///0001522 //       |
| NM_0011      | 0.0083 |          |       |       | -1.05  | 1.29   | 1.21   | 1.28   | <i>Fxyd5</i>                | FXD domain-containing ion transport regulator 5                                                                                     | 0006810 // transport // inferred from electronic annotation///0006811 // ion transport /     |
| NM_008083    |        | 0.024    |       |       | -1.26  | 1.02   | 1.21   | -1.12  | <i>Gap43</i>                | growth associated protein 43                                                                                                        | 0007275 // multicellular organismal development // inferred from electronic annotation//     |
| NM_0205      | 0.0195 | 0.007    | 0.022 |       | -1.44  | 1.37   | 1.21   | 1.04   | <i>Retnla</i>               | resistin like alpha                                                                                                                 |                                                                                              |
| NM_023065    |        | 0.003    |       |       | -1.03  | 1.16   | 1.21   | 1.01   | <i>Ifi30</i>                | interferon gamma inducible protein 30                                                                                               | 0002376 // immune system process // inferred from electronic annotation///0019886 //         |
| NM_0254      | 0.0424 | 0.028    |       |       | -1.01  | 1.17   | 1.21   | 1.08   | <i>Llph</i>                 | LLP homolog, long-term synaptic facilitation (Aplysia)                                                                              |                                                                                              |
| NM_00117     | 0.0062 | 0.047    |       |       | 1.00   | 1.15   | 1.21   | 1.43   | <i>Coro1c</i>               | coronin, actin binding protein 1C                                                                                                   | 0000147 // actin cortical patch assembly // traceable author statement///0001755 // nei      |
| NM_0104      | 0.0375 |          |       |       | 1.02   | 1.23   | 1.21   | 1.03   | <i>Hsd17b7</i>              | hydroxysteroid (17-beta) dehydrogenase 7                                                                                            | 0006629 // lipid metabolic process // inferred from electronic annotation///0006694 // s     |
| NM_011284    |        | 0.034    |       |       | 1.06   | 1.10   | 1.21   | 1.17   | <i>Rpa2</i>                 | replication protein A2                                                                                                              | 0000723 // telomere maintenance // not recorded///0000724 // double-strand break re          |
| NM_0253      | 0.0468 |          |       |       | 1.03   | 1.34   | 1.21   | 1.03   | <i>Aaed1</i>                | AhpC/TSA antioxidant enzyme domain containing 1                                                                                     |                                                                                              |
| NM_016737    |        | 0.038    |       |       | -1.54  | -1.95  | 1.21   | 1.28   | <i>Stip1</i>                | stress-induced phosphoprotein 1                                                                                                     |                                                                                              |
| NM_001146222 | ///    | 0.029    |       |       | -1.05  | 1.05   | 1.21   | 1.11   | <i>Dpy30</i>                | dpy-30 homolog (C. elegans)                                                                                                         | 0006348 // chromatin silencing at telomere // not recorded///0006351 // transcription, t     |
| NM_010158    | ///XM  | 0.033    |       |       | -1.05  | 1.13   | 1.21   | 1.14   | <i>Khdrbs3</i>              | KH domain containing, RNA binding, signal transduction associated 3                                                                 | 0006351 // transcription, DNA-templated // inferred from electronic annotation///00063       |
| NM_026330    | ///XM  | 0.005    |       |       | -1.04  | 1.14   | 1.21   | 1.08   | <i>Nsmce1</i>               | non-SMC element 1 homolog (S. cerevisiae)                                                                                           | 0000724 // double-strand break repair via homologous recombination // not recorded///        |
| NM_0266      | 0.0136 |          |       |       | -1.05  | 1.19   | 1.21   | 1.28   | <i>Fam96a</i>               | family with sequence similarity 96, member A                                                                                        | 0007059 // chromosome segregation // not recorded///0016226 // iron-sulfur cluster as        |
| NM_023397    | ///NR  | 0.01     |       |       | 1.06   | 1.08   | 1.21   | 1.18   | <i>Mdp1</i>                 | magnesium-dependent phosphatase 1                                                                                                   | 0006470 // protein dephosphorylation // inferred from electronic annotation///0016311        |
| NM_001113358 | ///    | 0.016    |       |       | -1.12  | -1.02  | 1.21   | 1.13   | <i>Dad1</i>                 | defender against cell death 1                                                                                                       | 0001824 // blastocyst development // inferred from mutant phenotype///0006486 // prc         |
| NM_0254      | 0.0209 |          |       |       | 1.02   | 1.28   | 1.21   | -1.10  | <i>Mrps28</i>               | mitochondrial ribosomal protein S28                                                                                                 |                                                                                              |
| NM_009007    | ///XM  | 0.039    |       |       | 1.01   | 1.14   | 1.21   | 1.02   | <i>Rac1</i>                 | RAS-related C3 botulinum substrate 1                                                                                                | 0001934 // positive regulation of protein phosphorylation // not recorded///0002093 // i     |
| NM_022018    | ///XM  | 0.042    |       |       | 1.06   | 1.03   | 1.21   | 1.18   | <i>Fam129a</i>              | family with sequence similarity 129, member A                                                                                       | 0001933 // negative regulation of protein phosphorylation // inferred from mutant phen       |
| NM_0252      | 0.0146 |          |       |       | -1.03  | 1.21   | 1.21   | 1.29   | <i>Tbrg1</i>                | transforming growth factor beta regulated gene 1                                                                                    | 0006260 // DNA replication // not recorded///0006260 // DNA replication // inferred fr       |
| NM_0012      | 0.0419 |          |       |       | 1.02   | 1.24   | 1.22   | 1.28   | <i>Ramp2</i> ///Vps25       | receptor (calcitonin) activity modifying protein 2///vacuolar protein sorting 25 (yeast)                                            | 0001525 // angiogenesis // not recorded///0001570 // vasculogenesis // not recorded///       |
| NM_0104      | #####  |          |       |       | 1.12   | 1.87   | 1.22   | -1.19  | <i>Ier2</i>                 | immediate early response 2                                                                                                          | 000182 // neuron differentiation // not recorded///0048870 // cell motility // not recor     |
| NM_0084      | 0.0308 |          |       |       | -1.19  | 1.08   | 1.22   | 1.11   | <i>Lgals1</i>               | lectin, galactose binding, soluble 1                                                                                                | 0002317 // plasma cell differentiation // inferred from direct assay///0006915 // apopto     |
| NM_1814      | 0.0403 |          |       |       | 1.14   | -1.27  | 1.22   | 1.10   | <i>Gm15583</i> ///Zbed4     | predicted gene 15583///zinc finger, BED type containing 4                                                                           |                                                                                              |
| NM_001172062 | ///    | 0.011    |       |       | -1.04  | 1.03   | 1.22   | 1.09   | <i>Lman1</i>                | lectin, mannose-binding, 1                                                                                                          | 0006810 // transport // inferred from electronic annotation///0006888 // ER to Golgi ves     |
| NM_001166368 | ///    | 0.017    |       |       | -1.21  | 1.05   | 1.22   | 1.27   | <i>Fkbp2</i>                | FK506 binding protein 2                                                                                                             | 0000413 // protein peptidyl-prolyl isomerization // not recorded///0006457 // protein fo     |
| NM_145851    | ///XM  | 0.00650  | 0.013 |       | -1.12  | 1.19   | 1.22   | 1.05   | <i>Cables2</i>              | CDK5 and Abl enzyme substrate 2                                                                                                     | 0007049 // cell cycle // inferred from electronic annotation///0051301 // cell division // i |
| NM_008704    |        | 0.034    |       |       | -1.05  | 1.10   | 1.22   | 1.02   | <i>Nme1</i>                 | NME/NM23 nucleoside diphosphate kinase 1                                                                                            | 0002762 // negative regulation of myeloid leukocyte differentiation // not recorded///00     |
| NM_027959    |        | 0.004    |       |       | -1.30  | -1.12  | 1.22   | 1.09   | <i>Pdia6</i>                | protein disulfide isomerase associated 6                                                                                            | 0006457 // protein folding // not recorded///0008152 // metabolic process // inferred fr     |
| NM_054044    | ///XM  | 0.036    |       |       | -1.03  | -1.01  | 1.22   | -1.00  | <i>Adgra2</i>               | adhesion G protein-coupled receptor A2                                                                                              | 0001525 // angiogenesis // inferred from mutant phenotype///0002040 // sprouting ang         |
| NM_0010      | 0.045  |          |       |       | 1.18   | 1.66   | 1.22   | 1.41   | <i>Elov1</i>                | elongation of very long chain fatty acids (FEN1/Elo2, SUR4/Elo3, yeast)-like 1                                                      | 0006629 // lipid metabolic process // inferred from electronic annotation///0006631 // f     |
| NM_0113      | 0.0245 |          | 0.014 |       | -1.05  | 1.42   | 1.22   | 1.35   | <i>Ccl11</i>                | chemokine (C-C motif) ligand 11                                                                                                     | 0001938 // positive regulation of endothelial cell proliferation // not recorded///0002544   |
| NR_002840    | ///NR  | 0.028543 | 0.043 |       | 1.56   | 1.70   | 1.22   | -1.04  | <i>Gas5</i> ///Snord47      | growth arrest specific 5///small nucleolar RNA, C/D box 47                                                                          |                                                                                              |
| NM_001134692 | ///    | 0.045    |       |       | -1.01  | 1.06   | 1.22   | 1.22   | <i>LOC102632739</i> ///Ost4 | dolichyl-diphosphooligosaccharide--protein glycosyltransferase subunit 4-like///oligosaccharyltransferase 4 homolog (S. cerevisiae) | 0006520 // cellular amino acid metabolic process // inferred from electronic annotation//    |
| NM_0081      | 0.0473 | 0.034    |       |       | 1.03   | 1.25   | 1.22   | 1.05   | <i>GluD1</i>                | glutamate dehydrogenase 1                                                                                                           | 0006461 // protein complex assembly // inferred from mutant phenotype///0030859 // t         |
| NM_0011      | 0.0394 |          | 0.007 |       | 1.01   | 1.09   | 1.22   | 1.22   | <i>Dlg5</i>                 | discs, large homolog 5 (Drosophila)                                                                                                 | 0002690 // positive regulation of leukocyte chemotaxis // not recorded///0006508 // prc      |
| NM_0101      | 0.0051 | #####    |       |       | -1.11  | 1.18   | 1.22   | 1.02   | <i>F7</i>                   | coagulation factor VII                                                                                                              | 0006810 // transport // inferred from electronic annotation///0006886 // intracellular pr    |
| NM_018829    | ///XM  | 0.048    |       |       | 1.04   | 1.08   | 1.22   | 1.15   | <i>Ap3m1</i>                | adaptor-related protein complex 3, mu 1 subunit                                                                                     | 0006508 // proteolysis // inferred from electronic annotation///0010243 // response to c     |
| NM_0119      | 0.0053 | 0.037    |       |       | -1.09  | 1.15   | 1.22   | 1.13   | <i>Psmb2</i>                | proteasome (prosome, macropain) subunit, beta type 2                                                                                |                                                                                              |

| RefSeq                         | Tri p  | 24h   | p     | 48h   | p | 72h | FD Air | FD 24h | FD 48h | FD 72h | Gene Symbol                        | Gene Title                                                                                       | Gene Ontology Biological Process                                                             |
|--------------------------------|--------|-------|-------|-------|---|-----|--------|--------|--------|--------|------------------------------------|--------------------------------------------------------------------------------------------------|----------------------------------------------------------------------------------------------|
| NM_010941                      |        |       | 0.009 |       |   |     | -1.01  | 1.10   | 1.22   | 1.05   | <i>Nsdhl</i>                       | NAD(P) dependent steroid dehydrogenase-like                                                      | 0001942 // hair follicle development // inferred from mutant phenotype//0006629 // lig       |
| NM_022324                      |        |       | 0.003 |       |   |     | -1.43  | -1.20  | 1.22   | -1.27  | <i>Sdf2l1</i>                      | stromal cell-derived factor 2-like 1                                                             | 0000032 // cell wall mannoprotein biosynthetic process // not recorded//0007275 // mi        |
| NM_0010                        | 0.0253 |       |       |       |   |     | 1.47   | 1.09   | 1.22   | 1.18   | <i>Pcdha11//Pcdha10//Pcdha12</i>   | protocadherin alpha 11//protocadherin alpha 10//protocadherin alpha 11//protocadherin alpha 12   | 0007155 // cell adhesion // inferred from electronic annotation//0007155 // cell adhesi      |
| NM_026532//NR                  |        | 0.04  |       |       |   |     | -1.04  | 1.02   | 1.22   | 1.29   | <i>Nutf2//Nutf2-ps1//Nutf2-ps2</i> | nuclear transport factor 2//nuclear transport factor 2, pseudogene 1//nuclear transport factor 2 | 0000060 // protein import into nucleus, translocation // not recorded//0006606 // prot       |
| NM_0259                        | 0.041  |       |       |       |   |     | 1.11   | -1.15  | 1.23   | 1.01   | <i>Dnajb4</i>                      | Dnaj (Hsp40) homolog, subfamily B, member 4                                                      | 0006457 // protein folding // inferred from electronic annotation                            |
| NM_007426                      |        |       |       | 0.005 |   |     | 1.20   | 1.20   | 1.23   | -1.14  | <i>Angpt2</i>                      | angiopoietin 2                                                                                   | 0001525 // angiogenesis // inferred from genetic interaction//0001666 // response to h       |
| NM_0012                        | 0.0194 |       |       |       |   |     | -1.13  | 1.25   | 1.23   | 1.15   | <i>Cd302</i>                       | CD302 antigen                                                                                    | 0006909 // phagocytosis // not recorded                                                      |
| NM_0079                        | #####  |       |       |       |   |     | 1.17   | 4.07   | 1.23   | 1.25   | <i>Egr1</i>                        | early growth response 1                                                                          | 0000122 // negative regulation of transcription from RNA polymerase II promoter // infer     |
| NM_011234                      |        | 0.045 |       |       |   |     | -1.07  | 1.11   | 1.23   | 1.09   | <i>Rad51</i>                       | RAD51 homolog                                                                                    | 0000724 // double-strand break repair via homologous recombination // inferred from d        |
| NM_0275                        | 0.0083 | ##### | 0.006 |       |   |     | -1.13  | 1.07   | 1.23   | 1.17   | <i>Pvr</i>                         | poliovirus receptor                                                                              | 0002860 // positive regulation of natural killer cell mediated cytotoxicity directed against |
| NM_0262                        | 0.0135 | 0.008 |       |       |   |     | -1.00  | 1.17   | 1.23   | 1.08   | <i>Tmed9</i>                       | transmembrane emp24 protein transport domain containing 9                                        | 0006810 // transport // inferred from electronic annotation//0007030 // Golgi organiza       |
| NM_0095                        | 0.0315 |       |       | 0.02  |   |     | -1.10  | 1.17   | 1.23   | 1.07   | <i>Xrcc5</i>                       | X-ray repair complementing defective repair in Chinese hamster cells 5                           | 0000237 // leptotene // inferred from mutant phenotype//0000723 // telomere mainte           |
| NM_001113554//                 |        | 0.004 |       |       |   |     | -1.13  | -1.00  | 1.23   | 1.12   | <i>Nudcd1</i>                      | NudC domain containing 1                                                                         |                                                                                              |
| NM_0103                        | 0.0352 | 0.021 |       |       |   |     | -1.06  | 1.18   | 1.23   | 1.10   | <i>Gusb</i>                        | glucuronidase, beta                                                                              | 0005975 // carbohydrate metabolic process // inferred from direct assay//0006027 // gl       |
| NM_0119                        | 0.0322 |       |       |       |   |     | -1.01  | 1.13   | 1.23   | 1.11   | <i>Psm5</i>                        | proteasome (prosome, macropain) subunit, alpha type 5                                            | 0006508 // proteolysis // inferred from electronic annotation//0006511 // ubiquitin-deg      |
| NM_0010                        | 0.0302 | 0.01  |       |       |   |     | 1.01   | 1.18   | 1.23   | 1.16   | <i>Slc7a2</i>                      | solute carrier family 7 (cationic amino acid transporter, y+ system), member 2                   | 0002537 // nitric oxide production involved in inflammatory response // inferred from m      |
| NM_175158                      |        | 0.003 |       |       |   |     | 1.02   | 1.10   | 1.23   | -1.00  | <i>Utp20</i>                       | UTP20, small subunit (SSU) processome component, homolog (yeast)                                 | 0006364 // rRNA processing // not recorded                                                   |
| NM_0011                        | 0.0144 | 0.041 |       |       |   |     | -1.05  | 1.35   | 1.23   | 1.13   | <i>Max</i>                         | Max protein                                                                                      | 0006351 // transcription, DNA-templated // inferred from electronic annotation//00063        |
| NM_028295//XR                  |        | 0.042 |       |       |   |     | -1.01  | -1.01  | 1.23   | -1.03  | <i>Pdia5</i>                       | protein disulfide isomerase associated 5                                                         | 0006457 // protein folding // not recorded//0008152 // metabolic process // inferred fr      |
| NM_001290541//NM_00101029895// |        |       | 0.038 |       |   |     | -1.28  | -1.32  | 1.23   | 1.03   | <i>Acer2</i>                       | alkaline ceramidase 2                                                                            | 0001953 // negative regulation of cell-matrix adhesion // not recorded//0006629 // hpic      |
| NM_001029895//                 |        | 0.007 |       |       |   |     | 1.05   | 1.11   | 1.23   | 1.16   | <i>Ate1</i>                        | arginyltransferase 1                                                                             | 0016598 // protein arginylation // inferred from direct assay                                |
| NM_0075                        | 0.0024 |       |       |       |   |     | 1.04   | 1.76   | 1.23   | 1.16   | <i>Btg2</i>                        | B cell translocation gene 2, anti-proliferative                                                  | 0000122 // negative regulation of transcription from RNA polymerase II promoter // not i     |
| NM_0114                        | 0.0351 |       |       |       |   |     | 1.09   | -1.10  | 1.23   | 1.18   | <i>Smarca2</i>                     | SWI/SNF related, matrix associated, actin dependent regulator of chromatin, subfamily B          | 0006325 // chromatin organization // traceable author statement//0006334 // nucleosc         |
| NM_0012                        | 0.0451 |       |       |       |   |     | 1.03   | 1.14   | 1.23   | 1.10   | <i>B3gnt9</i>                      | UDP-GlcNAc:betaGal beta-1,3-N-acetylglucosaminyltransferase 9                                    | 0006486 // protein glycosylation // inferred from electronic annotation                      |
| NM_001190804//                 |        | 0.019 |       |       |   |     | -1.25  | -1.06  | 1.23   | -1.03  | <i>Dnajb11</i>                     | Dnaj (Hsp40) homolog, subfamily B, member 11                                                     | 0006457 // protein folding // inferred from electronic annotation//0016556 // mRNA m         |
| NM_0010                        | 0.0331 |       |       |       |   |     | -1.11  | 1.18   | 1.23   | 1.14   | <i>Cd44</i>                        | CD44 antigen                                                                                     | 0001558 // regulation of cell growth // not recorded//0001658 // branching involved in       |
| NM_007523//XR                  |        | 0.028 |       |       |   |     | 1.04   | 1.10   | 1.23   | 1.10   | <i>Bak1</i>                        | BCL2-antagonist/killer 1                                                                         | 0001776 // leukocyte homeostasis // inferred from genetic interaction//0001782 // B c        |
| NM_0196                        | 0.0122 | 0.049 | 0.035 |       |   |     | -1.14  | 1.28   | 1.23   | 1.20   | <i>Hsd17b12</i>                    | hydroxysteroid (17-beta) dehydrogenase 12                                                        | 0006629 // lipid metabolic process // inferred from electronic annotation//0006633 // f      |
| NM_133859//XR                  |        | 0.01  | 0.006 |       |   |     | -1.11  | 1.01   | 1.23   | 1.23   | <i>Olfml3//LOC269472</i>           | olfactomedin-like 3//uncharacterized LOC269472                                                   | 0007275 // multicellular organismal development // inferred from electronic annotation       |
| NM_0011                        | 0.0223 | 0.043 |       |       |   |     | -1.08  | 1.06   | 1.24   | 1.03   | <i>Galnt1</i>                      | UDP-N-acetyl-alpha-D-galactosamine:polypeptide N-acetylglucosaminyltransferase 1                 | 0006486 // protein glycosylation // inferred from electronic annotation//0006493 // prc      |
| NM_0215                        | 0.0126 |       |       |       |   |     | 1.01   | 1.17   | 1.24   | 1.18   | <i>Rdh11</i>                       | retinol dehydrogenase 11                                                                         | 0006281 // DNA repair // inferred from electronic annotation//0006281 // DNA repair,         |
| NM_0091                        | #####  |       |       |       |   |     | 1.06   | 1.39   | 1.24   | 1.28   | <i>St3gal4</i>                     | ST3 beta-galactoside alpha-2,3-sialyltransferase 4                                               | 0001574 // ganglioside biosynthetic process // not recorded//0006486 // protein glycos       |
| NM_009274//XM                  |        | 0.037 |       |       |   |     | 1.01   | 1.06   | 1.24   | 1.30   | <i>Srpk2</i>                       | serine/arginine-rich protein specific kinase 2                                                   | 0000245 // spliceosomal complex assembly // inferred from direct assay//0000245 // sp        |
| NM_001113246//                 |        | 0.007 |       |       |   |     | -1.09  | 1.05   | 1.24   | 1.14   | <i>Chn1</i>                        | chimerin 1                                                                                       | 0007165 // signal transduction // inferred from electronic annotation//0007399 // nerv       |
| NM_145494//XM                  |        | 0.043 |       |       |   |     | 1.00   | 1.22   | 1.24   | 1.11   | <i>Me2</i>                         | malic enzyme 2, NAD(+)-dependent, mitochondrial                                                  | 0006108 // malate metabolic process // inferred from electronic annotation//0008152 //       |
| NM_0110                        | 0.0108 |       |       |       |   |     | 1.00   | -1.08  | 1.24   | 1.13   | <i>Pea15a</i>                      | phosphoprotein enriched in astrocytes 15A                                                        | 0000077 // DNA damage checkpoint // inferred from electronic annotation//0006810 //          |
| NM_001001493//XM_001           |        | 0.01  |       |       |   |     | 1.02   | 1.03   | 1.24   | 1.23   | <i>Gm2573//Wdr83os</i>             | predicted gene 2573//WD repeat domain 83 opposite strand                                         |                                                                                              |
| NM_0011                        | 0.0025 | 0.025 |       |       |   |     | -1.01  | 1.19   | 1.24   | 1.16   | <i>Acp1//LOC102642088</i>          | acid phosphatase 1, soluble//low molecular weight phosphotyrosine protein phosphatase 1          | 0006470 // protein dephosphorylation // inferred from electronic annotation//0035335         |
| NM_001033420//                 |        | 0.006 |       |       |   |     | -1.07  | -1.02  | 1.24   | 1.03   | <i>Dock1</i>                       | dedicator of cytokinesis 1                                                                       | 0006457 // hematopoietic progenitor cell differentiation // inferred from genetic interact   |
| NM_001039351//                 |        | 0.001 |       |       |   |     | 1.03   | 1.07   | 1.24   | 1.30   | <i>Nolc1</i>                       | nucleolar and coiled-body phosphoprotein 1                                                       | 0007000 // nucleolus organization // inferred from direct assay                              |
| NM_178111//XM_006500           |        | 0.031 |       |       |   |     | -1.04  | -1.03  | 1.24   | 1.21   | <i>Trp53inp2</i>                   | transformation related protein 53 inducible nuclear protein 2                                    | 0000045 // autophagosome assembly // not recorded//0001649 // osteoblast differenti          |
| NM_0215                        | 0.0227 |       |       |       |   |     | 1.01   | 1.22   | 1.24   | 1.15   | <i>Smu1</i>                        | smu-1 suppressor of mec-8 and unc-52 homolog (C. elegans)                                        |                                                                                              |
| NM_019710//XM                  |        | 0.032 |       |       |   |     | -1.09  | 1.03   | 1.24   | 1.22   | <i>Smc1a</i>                       | structural maintenance of chromosomes 1A                                                         | 0006281 // DNA repair // inferred from electronic annotation//0006974 // cellular resp       |
| NM_181470//XM                  |        | 0.039 |       |       |   |     | 1.02   | 1.13   | 1.24   | 1.21   | <i>Ltv1</i>                        | LTV1 homolog (S. cerevisiae)                                                                     |                                                                                              |
| NM_0010                        | 0.0249 | 0.014 |       |       |   |     | -1.03  | 1.18   | 1.24   | 1.12   | <i>Ids</i>                         | iduronate 2-sulfatase                                                                            | 0008152 // metabolic process // inferred from electronic annotation                          |
| NM_0119                        | 0.005  |       |       |       |   |     | -1.02  | 1.52   | 1.24   | 1.25   | <i>Abcd2</i>                       | ATP-binding cassette, sub-family D (ALD), member 2                                               | 0000038 // very long-chain fatty acid metabolic process // not recorded//0006635 // fat      |
| NM_0012                        | 0.0079 | 0.004 |       |       |   |     | -1.12  | 1.22   | 1.24   | 1.16   | <i>Fn1</i>                         | fibronectin 1                                                                                    | 0001525 // angiogenesis // inferred from electronic annotation//0001775 // cell activati     |
| NM_008448                      |        | 0.048 |       |       |   |     | 1.09   | 1.11   | 1.25   | 1.19   | <i>Kif5b</i>                       | kinesin family member 5B                                                                         | 0006839 // mitochondrial transport // traceable author statement//0007017 // microtu         |
| NM_0093                        | 0.0328 | 0.031 |       |       |   |     | -1.09  | 1.14   | 1.25   | 1.18   | <i>Tgfb2</i>                       | transforming growth factor, beta receptor II                                                     | 0001569 // patterning of blood vessels // inferred from mutant phenotype//0001570 //         |
| NM_0289                        | 0.002  |       |       |       |   |     | 1.06   | 1.46   | 1.25   | 1.35   | <i>Polr3c</i>                      | polymerase (RNA) III (DNA directed) polypeptide C                                                | 0002376 // immune system process // inferred from electronic annotation//0006351 //          |
| NM_007591                      |        | 0.018 | 0.022 |       |   |     | -1.13  | -1.11  | 1.25   | 1.22   | <i>Calr</i>                        | calreticulin                                                                                     | 0000122 // negative regulation of transcription from RNA polymerase II promoter // not i     |
| NM_029701//XM                  |        | 0.029 | 0.043 |       |   |     | -1.16  | 1.01   | 1.25   | 1.14   | <i>Spcs3</i>                       | signal peptidase complex subunit 3 homolog (S. cerevisiae)                                       | 0006465 // signal peptide processing // inferred from electronic annotation                  |
| NM_001039089//                 |        | 0.017 |       |       |   |     | -1.02  | 1.02   | 1.25   | 1.12   | <i>Sel1l</i>                       | sel-1 suppressor of lin-12-like (C. elegans)                                                     | 0007219 // Notch signaling pathway // inferred from electronic annotation//0030970 //        |
| NM_1460                        | 0.0059 | 0.015 |       |       |   |     | -1.05  | 1.14   | 1.25   | -1.05  | <i>Clptm1l</i>                     | CLPTM1-like                                                                                      | 0006915 // apoptotic process // inferred from electronic annotation                          |
| NM_001297606//                 |        | 0.027 |       |       |   |     | 1.04   | 1.21   | 1.25   | 1.32   | <i>Rad23a</i>                      | RAD23a homolog (S. cerevisiae)                                                                   | 0006281 // DNA repair // inferred from electronic annotation//0006289 // nucleotide-e        |
| NM_0158                        | 0.0018 |       |       |       |   |     | -1.09  | 1.08   | 1.25   | 1.19   | <i>Copb2</i>                       | coatomer protein complex, subunit beta 2 (beta prime)                                            | 0006810 // transport // inferred from electronic annotation//0006886 // intracellular pr     |
| NM_0012                        | 0.0084 |       |       |       |   |     | 1.03   | 1.42   | 1.25   | 1.09   | <i>Esd</i>                         | esterase D/formylglutathione hydrolase                                                           | 0046294 // formaldehyde catabolic process // inferred from electronic annotation             |
| NM_0010                        | 0.0142 |       |       |       |   |     | 1.03   | 1.43   | 1.25   | -1.05  | <i>Parl</i>                        | presenilin associated, rhomboid-like                                                             | 0006508 // proteolysis // inferred from genetic interaction//0006508 // proteolysis // in    |
| NM_00127970//                  |        | 0.01  |       |       |   |     | -1.15  | -1.22  | 1.25   | 1.12   | <i>Itag6</i>                       | integrin alpha 6                                                                                 | 0007155 // cell adhesion // inferred from electronic annotation//0007160 // cell-matrix      |
| NM_0013                        | 0.0321 |       |       |       |   |     | 1.05   | 1.19   | 1.25   | 1.06   | <i>Psm3</i>                        | proteasome (prosome, macropain) subunit, alpha type 3                                            | 0006508 // proteolysis // inferred from electronic annotation//0006511 // ubiquitin-deg      |
| NM_010104                      |        | 0.016 |       |       |   |     | -1.27  | -1.17  | 1.25   | -1.14  | <i>Edn1</i>                        | endothelin 1                                                                                     | 0000122 // negative regulation of transcription from RNA polymerase II promoter // not i     |
| NM_001313758//                 |        | 0.032 |       |       |   |     | 1.00   | 1.12   | 1.25   | 1.14   | <i>Prps2</i>                       | phosphoribosyl pyrophosphate synthetase 2                                                        | 0006015 // 5-phosphoribose 1-diphosphate biosynthetic process // not recorded//0006          |
| NM_001161419//                 |        | 0.016 |       |       |   |     | -1.06  | 1.16   | 1.25   | 1.15   | <i>Atp5g1</i>                      | ATP synthase, H+ transporting, mitochondrial F0 complex, subunit C1 (subunit 9)                  | 0006810 // transport // inferred from electronic annotation//0006811 // ion transport /      |
| NM_001290421//                 |        | 0.015 |       |       |   |     | 1.06   | 1.14   | 1.25   | 1.31   | <i>Flna</i>                        | filamin, alpha                                                                                   | 0001837 // epithelial to mesenchymal transition // inferred from genetic interaction//OC     |

| RefSeq       | Tri.p  | 24h | p     | 48h   | p     | 72h   | FD Air | FD 24h | FD 48h | FD 72h | Gene Symbol                               | Gene Title                                                                     | Gene Ontology Biological Process                                                          |
|--------------|--------|-----|-------|-------|-------|-------|--------|--------|--------|--------|-------------------------------------------|--------------------------------------------------------------------------------|-------------------------------------------------------------------------------------------|
| NM_153806    |        |     | 0.037 | 0.02  | -1.00 | 1.04  | 1.26   | 1.25   |        |        | <b>Dnttp2</b>                             | deoxynucleotidyltransferase, terminal, interacting protein 2                   | 0006351 // transcription, DNA-templated // inferred from electronic annotation//00063     |
| NM_001035854 | ///    |     | 0.037 |       | 1.00  | 1.22  | 1.26   | 1.05   |        |        | <b>Ap2b1</b>                              | adaptor-related protein complex 2, beta 1 subunit                              | 0003279 // cardiac septum development // inferred from mutant phenotype//0003281          |
| NM_0011      | #####  |     | 0.003 |       | -1.08 | 1.38  | 1.26   | 1.10   |        |        | <b>Mal</b>                                | myelin and lymphocyte protein, T cell differentiation protein                  | 0042552 // myelination // not recorded//13902043 // positive regulation of extrinsic apo  |
| NM_001199177 | ///    |     | 0.012 |       | -1.05 | 1.11  | 1.26   | 1.04   |        |        | <b>Opa1</b>                               | optic atrophy 1                                                                | 0000002 // mitochondrial genome maintenance // not recorded//0001843 // neural tut        |
| NM_025936    | ///XM  |     | 0.031 |       | -1.12 | 1.05  | 1.26   | 1.31   |        |        | <b>Rars</b>                               | arginyl-tRNA synthetase                                                        | 0006412 // translation // inferred from electronic annotation//0006418 // tRNA aminoa     |
| NM_0531      | 0.0225 |     |       |       | -1.05 | 1.16  | 1.26   | 1.45   |        |        | <b>Echs1</b>                              | enoyl Coenzyme A hydratase, short chain, 1, mitochondrial                      | 0006629 // lipid metabolic process // inferred from electronic annotation//0006631 // f.  |
| NM_021446    | ///XM  |     | 0.025 |       | 1.04  | 1.13  | 1.26   | 1.27   |        |        | <b>O610007P14RIK</b>                      | RIKEN cDNA O610007P14 gene                                                     | 0006629 // lipid metabolic process // inferred from electronic annotation//0006694 // s   |
| NM_0078      | 0.0156 |     | 0.012 |       | -1.12 | 1.13  | 1.26   | -1.02  |        |        | <b>Ddost</b>                              | dolichyl-di-phosphooligosaccharide-protein glycotransferase                    | 0006486 // protein glycosylation // inferred from sequence or structural similarity//0006 |
| NM_0214      | 0.0122 |     |       |       | 1.14  | 1.57  | 1.26   | 1.17   |        |        | <b>Stk4</b>                               | serine/threonine kinase 4                                                      | 0000165 // MAPK cascade // --//0000186 // activation of MAPKK activity // not recorde     |
| NM_007802    | ///XM  |     | 0.046 |       | -1.09 | 1.08  | 1.26   | 1.04   |        |        | <b>Ctsk</b>                               | cathepsin K                                                                    | 0001957 // intramembranous ossification // inferred from electronic annotation//00060     |
| NM_0012      | 0.047  |     |       |       | -1.06 | 1.24  | 1.26   | -1.05  |        |        | <b>Scarb1</b>                             | scavenger receptor class B, member 1                                           | 0001935 // endothelial cell proliferation // inferred from mutant phenotype//0006702 //   |
| NM_001081635 | ///    |     | 0.046 |       | -1.02 | -1.07 | 1.26   | -1.05  |        |        | <b>Ccnd3</b>                              | cyclin D3                                                                      | 0001934 // positive regulation of protein phosphorylation // not recorded//0007049 // i   |
| NM_0010      | 0.0032 |     |       |       | 1.03  | 1.48  | 1.26   | 1.21   |        |        | <b>Gm10052///Gm5803///Hnrnpa1///Gm564</b> | heterogeneous nuclear ribonucleoprotein A1 pseudogene//predicted gene 5803//he | 0000380 // alternative mRNA splicing, via spliceosome // inferred from direct assay//000  |
| NM_0115      | 0.0105 |     | 0.02  |       | 1.08  | 1.30  | 1.26   | 1.15   |        |        | <b>Sdc1</b>                               | syndecan 1                                                                     | 0001657 // ureteric bud development // inferred from electronic annotation//0006954 //    |
| NM_026554    |        |     | 0.013 |       | -1.03 | -1.01 | 1.26   | 1.16   |        |        | <b>Ncbp2</b>                              | nuclear cap binding protein subunit 2                                          | 0000184 // nuclear-transcribed mRNA catabolic process, nonsense-mediated decay // no      |
| NM_024180    | ///XM  |     | 0.032 |       | -1.05 | 1.01  | 1.26   | 1.19   |        |        | <b>Ormdl2</b>                             | ORM1-like 2 (S. cerevisiae)                                                    | 0006672 // ceramide metabolic process // not recorded//0090155 // negative regulatio      |
| NM_0012      | 0.0237 |     |       |       | -1.05 | 1.15  | 1.26   | 1.16   |        |        | <b>Immt</b>                               | inner membrane protein, mitochondrial                                          | 0042407 // cristae formation // not recorded//0051560 // mitochondrial calcium ion ho     |
| NM_029578    |        |     | 0.036 |       | -1.02 | 1.15  | 1.26   | 1.11   |        |        | <b>Tgds</b>                               | TDP-glucose 4,6-dehydratase                                                    | 0009225 // nucleotide-sugar metabolic process // inferred from electronic annotation      |
| NM_019824    |        |     | 0.012 |       | -1.19 | 1.09  | 1.26   | 1.17   |        |        | <b>Arpc3</b>                              | actin related protein 2/3 complex, subunit 3                                   | 0030833 // regulation of actin filament polymerization // inferred from electronic annota |
| NM_133225    |        |     | 0.024 |       | 1.06  | 1.21  | 1.27   | 1.03   |        |        | <b>Acbd3</b>                              | acyl-Coenzyme A binding domain containing 3                                    | 0006629 // lipid metabolic process // inferred from electronic annotation//0006694 // s   |
| NM_009840    |        |     | 0.013 |       | -1.18 | -1.10 | 1.27   | 1.31   |        |        | <b>Cct8</b>                               | chaperonin containing Tcp1, subunit 8 (theta)                                  | 0006457 // protein folding // inferred from electronic annotation//0007339 // binding c   |
| NM_001177556 | ///    |     | 0.003 |       | -1.05 | 1.03  | 1.27   | 1.14   |        |        | <b>Gng12</b>                              | guanin nucleotide binding protein (G protein), gamma 12                        | 0007165 // signal transduction // inferred from electronic annotation//0007186 // G-pr    |
| NM_010477    | ///XM  |     | 0.02  |       | -1.41 | -1.53 | 1.27   | 1.02   |        |        | <b>Hspd1</b>                              | heat shock protein 1 (chaperonin)                                              | 0001666 // response to hypoxia // inferred from electronic annotation//0002236 // dete    |
| NM_172685    |        |     | 0.005 | 0.024 | -1.08 | 1.15  | 1.27   | 1.31   |        |        | <b>Slc25a24</b>                           | solute carrier family 25 (mitochondrial carrier, phosphate carrier), member 24 | 0006810 // transport // inferred from electronic annotation//0006839 // mitochondria      |
| NM_144514    | ///XM  |     | ##### |       | -1.07 | 1.06  | 1.27   | 1.16   |        |        | <b>Commd1</b>                             | COMM domain containing 1                                                       | 0006351 // transcription, DNA-templated // inferred from electronic annotation//00063     |
| NM_1332      | 0.0105 |     |       |       | 1.01  | -1.21 | 1.27   | 1.16   |        |        | <b>Mtmr4</b>                              | myotubularin related protein 4                                                 | 0006470 // protein dephosphorylation // inferred from electronic annotation//0007179      |
| NM_001310746 | ///    |     | 0.04  |       | -1.05 | 1.10  | 1.27   | 1.01   |        |        | <b>Ubl5</b>                               | ubiquitin-like 5                                                               | 0000398 // mRNA splicing, via spliceosome // not recorded//0006464 // cellular protei     |
| NM_0085      | 0.0136 |     | 0.008 |       | 1.02  | 1.19  | 1.27   | 1.16   |        |        | <b>Mcm3</b>                               | minichromosome maintenance deficient 3 (S. cerevisiae)                         | 0006260 // DNA replication // inferred from electronic annotation//0006270 // DNA rep     |
| NM_025388    |        |     | 0.006 |       | 1.02  | 1.16  | 1.27   | 1.13   |        |        | <b>Ufc1</b>                               | ubiquitin-fold modifier conjugating enzyme 1                                   | 0034976 // response to endoplasmic reticulum stress // not recorded//0071569 // prote     |
| NM_1460      | 0.0293 |     | 0.02  | 0.022 | -1.06 | 1.12  | 1.27   | 1.07   |        |        | <b>Cbwd1</b>                              | COBW domain containing 1                                                       | 0006810 // transport // inferred from electronic annotation//0007565 // female pregna     |
| NM_008096    |        |     | 0.008 |       | -1.39 | 1.01  | 1.28   | -1.02  |        |        | <b>Gc</b>                                 | group specific component                                                       |                                                                                           |
| NM_1338      | 0.0396 |     | 0.045 |       | -1.06 | 1.23  | 1.28   | 1.12   |        |        | <b>Lrrc59</b>                             | leucine rich repeat containing 59                                              |                                                                                           |
| NM_001159384 | ///    |     | 0.032 |       | 1.04  | 1.06  | 1.28   | 1.15   |        |        | <b>Mlx</b>                                | MAX-like protein X                                                             | 0000122 // negative regulation of transcription from RNA polymerase II promoter // not i  |
| NM_0078      | 0.0388 |     | ##### | 0.015 | -1.22 | 1.10  | 1.28   | 1.08   |        |        | <b>Cyp7b1</b>                             | cytochrome P450, family 7, subfamily b, polypeptide 1                          | 0006629 // lipid metabolic process // inferred from electronic annotation//0006699 // b   |
| NM_008981    | ///XM  |     | 0.034 |       | 1.01  | 1.14  | 1.28   | 1.20   |        |        | <b>Ptprg</b>                              | protein tyrosine phosphatase, receptor type, G                                 | 0006470 // protein dephosphorylation // inferred from electronic annotation//0010633      |
| NM_0119      | 0.0043 |     |       |       | 1.06  | 1.35  | 1.28   | 1.32   |        |        | <b>Xrn2</b>                               | 5'-3' exoribonuclease 2                                                        | 0000738 // DNA catabolic process, exonucleolytic // not recorded//0006139 // nucleob:     |
| NM_0012      | 0.0229 |     |       |       | 1.04  | -1.66 | 1.28   | 1.30   |        |        | <b>Klf10</b>                              | Kruppel-like factor 10                                                         | 0006351 // transcription, DNA-templated // inferred from electronic annotation//00063     |
| NM_010790    | ///XM  |     | 0.017 |       | -1.07 | 1.16  | 1.28   | 1.07   |        |        | <b>Melk</b>                               | maternal embryonic leucine zipper kinase                                       | 0006468 // protein phosphorylation // inferred from electronic annotation//0006915 //     |
| NM_0291      | 0.0181 |     | 0.003 | 0.048 | -1.02 | 1.13  | 1.28   | 1.28   |        |        | <b>Sf3a3</b>                              | splicing factor 3a, subunit 3                                                  | 0000398 // mRNA splicing, via spliceosome // not recorded//0006397 // mRNA processi       |
| NM_026609    |        |     | 0.011 |       | 1.00  | 1.21  | 1.28   | 1.14   |        |        | <b>Leprot1</b>                            | leptin receptor overlapping transcript-like 1                                  |                                                                                           |
| NM_025360    | #####  |     |       |       | -1.13 | -1.01 | 1.29   | 1.13   |        |        | <b>Tmed3</b>                              | transmembrane emp24 domain containing 3                                        | 0006810 // transport // inferred from electronic annotation//0015031 // protein transp    |
| NM_0236      | 0.0112 |     |       |       | 1.09  | 1.39  | 1.29   | -1.12  |        |        | <b>Isyna1</b>                             | myo-inositol 1-phosphate synthase A1                                           | 0006021 // inositol biosynthetic process // inferred from electronic annotation//000662   |
| NM_001205286 | ///    |     | 0.045 |       | -1.03 | -1.08 | 1.29   | 1.09   |        |        | <b>Tmem39a</b>                            | transmembrane protein 39a                                                      | 0002230 // positive regulation of defense response to virus by host // not recorded//000  |
| NM_0094      | 0.013  |     | 0.028 |       | 1.01  | 1.24  | 1.29   | 1.16   |        |        | <b>Gm10145///Gm10705///Ube213</b>         | predicted gene 10145//predicted gene 10705//ubiquitin-conjugating enzyme E2L 3 | 0000209 // protein polyubiquitination // not recorded//0006351 // transcription, DNA-t    |
| NM_0011      | 0.029  |     | 0.039 |       | -1.05 | 1.18  | 1.29   | 1.33   |        |        | <b>Uhrf1</b>                              | ubiquitin-like, containing PHD and RING finger domains, 1                      | 0000122 // negative regulation of transcription from RNA polymerase II promoter // infer  |
| NM_0108      | 0.0392 |     |       |       | 1.17  | 1.44  | 1.29   | 1.45   |        |        | <b>Ncl</b>                                | nucleolin                                                                      | 0001525 // angiogenesis // not recorded//0006897 // endocytosis // not recorded//000      |
| NM_0280      | 0.0483 |     | 0.015 |       | -1.06 | 1.08  | 1.29   | 1.35   |        |        | <b>Cyb5r1</b>                             | cytochrome b5 reductase 1                                                      | 0006629 // lipid metabolic process // inferred from electronic annotation//0006694 // s   |
| NM_010295    | ///XM  |     | 0.044 | 0.042 | -1.05 | 1.17  | 1.29   | 1.18   |        |        | <b>Gclc</b>                               | glutamate-cysteine ligase, catalytic subunit                                   | 0006534 // cysteine metabolic process // not recorded//0006536 // glutamate metaboli      |
| NM_008720    |        |     | 0.04  |       | -1.22 | -1.03 | 1.29   | 1.36   |        |        | <b>Npc1</b>                               | Niemann-Pick type C1                                                           | 0006486 // protein glycosylation // inferred from direct assay//0006486 // protein glyco  |
| NM_0010      | 0.0097 |     |       |       | -1.06 | -1.73 | 1.29   | 1.38   |        |        | <b>Tsc22d3</b>                            | TSC22 domain family, member 3                                                  | 0000122 // negative regulation of transcription from RNA polymerase II promoter // infer  |
| NM_1724      | 0.0393 |     |       |       | 1.01  | -1.29 | 1.30   | 1.19   |        |        | <b>Slc38a5</b>                            | solute carrier family 38, member 5                                             | 0003333 // amino acid transmembrane transport // not recorded//0015804 // neutral a       |
| NM_001304758 | ///    |     | 0.021 |       | -1.04 | 1.18  | 1.30   | 1.18   |        |        | <b>Coq7</b>                               | demethyl-Q 7                                                                   | 0000122 // negative regulation of transcription from RNA polymerase II promoter // not i  |
| NM_0093      | 0.0125 |     | 0.018 |       | -1.12 | 1.72  | 1.30   | 1.02   |        |        | <b>Tfpi2</b>                              | tissue factor pathway inhibitor 2                                              | 0007596 // blood coagulation // inferred from electronic annotation//0007599 // hemo      |
| NM_1528      | 0.0143 |     |       |       | 1.17  | 1.66  | 1.30   | 1.20   |        |        | <b>Plk2</b>                               | polo-like kinase 2                                                             | 0000082 // G1/S transition of mitotic cell cycle // not recorded//0000278 // mitotic cell |
| NM_0261      | 0.046  |     | 0.006 |       | -1.11 | 1.14  | 1.30   | 1.08   |        |        | <b>Gtf3c6</b>                             | general transcription factor IIC, polypeptide 6, alpha                         | 0006351 // transcription, DNA-templated // not recorded//0006383 // transcription fro     |
| NM_175096    |        |     | 0.016 |       | -1.10 | -1.59 | 1.31   | -1.07  |        |        | <b>Stbd1</b>                              | starch binding domain 1                                                        | 0005975 // carbohydrate metabolic process // inferred from electronic annotation//0000    |
| NM_0010      | 0.0119 |     | 0.013 |       | -1.04 | 1.16  | 1.31   | 1.48   |        |        | <b>Ralgapa1</b>                           | Ral GTPase activating protein, alpha subunit 1                                 | 0006355 // regulation of transcription, DNA-templated // inferred from direct assay//00   |
| NM_0215      | 0.0251 |     |       |       | -1.01 | 1.22  | 1.31   | 1.35   |        |        | <b>LOC102642514///Nsa2</b>                | ribosome biogenesis protein NSA2 homolog//NSA2 ribosome biogenesis homolog (S. | 0006364 // rRNA processing // inferred from electronic annotation//0042254 // riboson     |
| NM_0010      | 0.0034 |     | 0.016 |       | 1.00  | 1.19  | 1.31   | 1.20   |        |        | <b>Gnptab</b>                             | N-acetylglucosamine-1-phosphate transferase, alpha and beta subunits           | 0007040 // lysosome organization // not recorded//0009306 // protein secretion // infe    |
| NM_019642    | ///XM  |     | 0.029 |       | -1.17 | 1.02  | 1.31   | 1.26   |        |        | <b>Rpn2</b>                               | ribophorin II                                                                  | 0006486 // protein glycosylation // inferred from electronic annotation//0006487 // prc   |
| NM_0117      | 0.0048 |     | ##### |       | -1.01 | 1.16  | 1.31   | 1.40   |        |        | <b>Wdr1</b>                               | WD repeat domain 1                                                             | 0007605 // sensory perception of sound // not recorded//0030036 // actin cytoskeleton     |
| NM_010480    |        |     | 0.022 |       | -1.39 | -1.59 | 1.31   | 1.05   |        |        | <b>Hsp90aa1</b>                           | heat shock protein 90, alpha (cytosolic), class A member 1                     | 0001764 // neuron migration // not recorded//0006457 // protein folding // inferred frc   |
| NM_0010      | 0.0046 |     |       |       | -1.10 | -1.55 | 1.31   | 1.28   |        |        | <b>Tmem2</b>                              | transmembrane protein 2                                                        | 0007275 // multicellular organismal development // inferred from electronic annotation    |
| NM_001164190 | ///    |     | 0.043 |       | 1.08  | 1.05  | 1.32   | 1.46   |        |        | <b>Mtm1</b>                               | X-linked myotubular myopathy gene 1                                            | 0006470 // protein dephosphorylation // not recorded//0006629 // lipid metabolic proc     |

| RefSeq       | Tri         | p 24h  | p 48h | p 72h | FD Air | FD 24h | FD 48h | FD 72h      | Gene Symbol                                                                   | Gene Title                                                                            | Gene Ontology Biological Process                                                          |
|--------------|-------------|--------|-------|-------|--------|--------|--------|-------------|-------------------------------------------------------------------------------|---------------------------------------------------------------------------------------|-------------------------------------------------------------------------------------------|
| NM_0242      |             | 0.0069 | 0.002 |       | -1.18  | 1.17   | 1.32   | 1.19        | <b>Sec13</b>                                                                  | SEC13 homolog, nuclear pore and COPII coat complex component                          | 0006810 // transport // inferred from electronic annotation//0006888 // ER to Golgi ves   |
| NM_0174      |             | 0.0062 |       | 0.028 | -1.09  | 1.27   | 1.32   | 1.18        | <b>Copp2</b>                                                                  | coatamer protein complex, subunit gamma 2                                             | 0006810 // transport // inferred from electronic annotation//0006886 // intracellular pr  |
| NM_011057    | //XM_006520 |        | 0.005 |       | 1.42   | 1.40   | 1.32   | 1.19        | <b>Pdgfb</b>                                                                  | platelet derived growth factor, B polypeptide                                         | 0001568 // blood vessel development // inferred from expression pattern//0001666 // r     |
| NM_028303    | //XM        | 0.022  |       |       | -1.04  | 1.08   | 1.32   | 1.09        | <b>Pdzd11</b>                                                                 | PDZ domain containing 11                                                              | 0006887 // exocytosis // not recorded//0007269 // neurotransmitter secretion // not r     |
| NM_0010      |             | 0.0432 | 0.015 |       | -1.02  | 1.35   | 1.32   | 1.32        | <b>Kdm7a</b>                                                                  | lysine (K)-specific demethylase 7A                                                    | 0006351 // transcription, DNA-templated // inferred from electronic annotation//00063     |
| NM_023579    | //XM        | 0.031  |       |       | 1.04   | 1.11   | 1.32   | 1.33        | <b>Ipo5</b>                                                                   | importin 5                                                                            | 0000059 // protein import into nucleus, docking // not recorded//0000060 // protein im    |
| NM_0104      |             | 0.0396 |       |       | 1.27   | 3.72   | 1.32   | 1.07        | <b>Nr4a1</b>                                                                  | nuclear receptor subfamily 4, group A, member 1                                       | 0001938 // positive regulation of endothelial cell proliferation // not recorded//000204  |
| NM_0011      |             | 0.0229 |       |       | -1.10  | 1.48   | 1.32   | -1.20       | <b>Hist1h2aa</b> // <b>Hist1h2ap</b>                                          | histone cluster 1, H2aoc//histone cluster 1, H2ap                                     | 0006325 // chromatin organization // not recorded//0006342 // chromatin silencing // i    |
| NM_0089      |             | 0.0466 |       |       | 1.03   | 1.21   | 1.33   | 1.21        | <b>Psma2</b>                                                                  | proteasome (prosome, macropain) subunit, alpha type 2                                 | 0006508 // proteolysis // inferred from electronic annotation//0006511 // ubiquitin-deg   |
| NM_0237      |             | 0.0237 |       |       | 1.16   | 1.64   | 1.33   | 1.65        | <b>Etv5</b>                                                                   | ets variant 5                                                                         | 0006355 // regulation of transcription, DNA-templated // inferred from electronic annot   |
| NM_145953    | //XM        | 0.021  |       |       | -1.16  | -1.24  | 1.33   | -1.05       | <b>Cth</b>                                                                    | cystathionase (cystathionine gamma-lyase)                                             | 0006749 // glutathione metabolic process // not recorded//0008285 // negative regulat     |
| NM_0012      |             | 0.0071 | 0.04  |       | -1.13  | 1.32   | 1.33   | 1.18        | <b>Psat1</b>                                                                  | phosphoserine aminotransferase 1                                                      | 0006564 // L-serine biosynthetic process // inferred from electronic annotation//00081    |
| NM_1451      |             | 0.0188 | 0.03  |       | -1.02  | 1.16   | 1.33   | 1.18        | <b>Mgl2</b>                                                                   | macrophage galactose N-acetyl-galactosamine specific lectin 2                         |                                                                                           |
| NM_0135      |             | 0.0224 | 0.018 |       | -1.89  | -4.51  | 1.33   | -1.17       | <b>Hsph1</b>                                                                  | heat shock 105kDa/110kDa protein 1                                                    | 0006986 // response to unfolded protein // traceable author statement//0043524 // ne      |
| NM_001164787 | //          | 0.015  |       |       | -1.01  | 1.01   | 1.34   | 1.24        | <b>Sprr2a1</b> // <b>Sprr2a2</b> // <b>Sprr2a3</b>                            | small proline-rich protein 2A1//small proline-rich protein 2A2//small proline-rich pr | 0008360 // regulation of cell shape // traceable author statement//0008544 // epidermi    |
| NM_0011      |             | 0.0134 | 0.044 | 0.048 | -1.09  | 1.33   | 1.34   | 1.50        | <b>Kit</b>                                                                    | kit oncogene                                                                          | 0000187 // activation of MAPK activity // not recorded//0001541 // ovarian follicle deve  |
| NM_010860    | //XM        | 0.021  |       |       | -1.07  | 1.02   | 1.34   | 1.31        | <b>Myf6</b> // <b>Gm10080</b>                                                 | myosin, light polypeptide 6, alkali, smooth muscle and non-muscle//predicted gene 1   | 0006936 // muscle contraction // traceable author statement//0007519 // skeletal musc     |
| NM_025310    |             | 0.028  | 0.011 |       | 1.01   | 1.17   | 1.34   | 1.20        | <b>Ftsj3</b>                                                                  | FtsJ homolog 3 (E. coli)                                                              | 0000453 // enzyme-directed rRNA 2'-O-methylation // inferred from electronic annotati     |
| NM_001301211 | //          | 0.045  |       |       | 1.03   | 1.11   | 1.34   | 1.14        | <b>Ap1g1</b>                                                                  | adaptor protein complex AP-1, gamma 1 subunit                                         | 0000226 // microtubule cytoskeleton organization // not recorded//0006810 // transpo      |
| NM_001025192 | //          | 0.039  |       |       | 1.07   | 1.17   | 1.35   | 1.27        | <b>Cxadr</b>                                                                  | coxsackie virus and adenovirus receptor                                               | 0007005 // mitochondrion organization // inferred from mutant phenotype//0007155 //       |
| NR_030708    | //XM_       | 0.009  |       |       | 1.08   | 1.16   | 1.35   | 1.31        | <b>6820431F20Rik</b> // <b>Gm21811</b>                                        | cadherin 11 pseudogene//predicted gene, 21811                                         | 0007156 // homophilic cell adhesion via plasma membrane adhesion molecules // inferre     |
| NM_025968    | //XM        | 0.029  |       |       | 1.03   | 1.03   | 1.35   | 1.36        | <b>Ptgr1</b>                                                                  | prostaglandin reductase 1                                                             | 0006693 // prostaglandin metabolic process // inferred from electronic annotation//000    |
| NM_0092      |             | 0.0043 |       |       | -1.01  | 2.18   | 1.35   | -1.13       | <b>Sprr1a</b>                                                                 | small proline-rich protein 1A                                                         | 0018149 // peptide cross-linking // not recorded//0030216 // keratinocyte differentiat    |
| NM_020259    | //XM        | 0.008  | 0.036 |       | 1.05   | 1.07   | 1.35   | 1.42        | <b>Hhip</b>                                                                   | Hedgehog-interacting protein                                                          | 0005975 // carbohydrate metabolic process // inferred from electronic annotation//000     |
| NM_0012      |             | 0.0262 | 0.021 |       | 1.05   | 1.27   | 1.36   | 1.20        | <b>Ddx46</b>                                                                  | DEAD (Asp-Glu-Ala-Asp) box polypeptide 46                                             | 0000398 // mRNA splicing, via spliceosome // not recorded//0006397 // mRNA processi       |
| NM_0079      |             | 0.0087 | 0.033 |       | -1.07  | 1.20   | 1.36   | 1.19        | <b>Erh</b>                                                                    | enhancer of rudimentary homolog (Drosophila)                                          | 0001649 // osteoblast differentiation // inferred from direct assay//0006221 // pyrimidi  |
| NM_001145799 | //          | 0.035  |       |       | -1.19  | -1.15  | 1.36   | 1.06        | <b>Ctla2a</b> // <b>Ctla2b</b>                                                | cytotoxic T lymphocyte-associated protein 2 alpha//cytotoxic T lymphocyte-associate   | 0010951 // negative regulation of endopeptidase activity // traceable author statement//  |
| NM_00119     | #####       |        | 0.033 |       | -1.05  | 1.20   | 1.36   | 1.21        | <b>Psma4</b>                                                                  | proteasome (prosome, macropain) subunit, alpha type 4                                 | 0006936 // proteolysis // inferred from electronic annotation//0006511 // ubiquitin-deg   |
| NM_0085      |             | 0.0374 | 0.025 |       | 1.03   | 1.26   | 1.36   | 1.22        | <b>Met</b>                                                                    | met proto-oncogene                                                                    | 0000122 // negative regulation of transcription from RNA polymerase II promoter // not r  |
| NM_0089      |             | 0.0364 |       |       | -1.11  | 1.11   | 1.36   | 1.42        | <b>Psmc1</b>                                                                  | protease (prosome, macropain) 26S subunit, ATPase 1                                   | 0030163 // protein catabolic process // inferred from electronic annotation//0030433 //   |
| NM_030889    | //XM        | 0.016  |       |       | 1.02   | 1.10   | 1.37   | 1.25        | <b>Sorcs2</b>                                                                 | sortilin-related VPS10 domain containing receptor 2                                   | 0006810 // transport // inferred from electronic annotation                               |
| NM_001033375 | //          | 0.041  |       |       | 1.03   | 1.07   | 1.37   | 1.20        | <b>A230046K03Rik</b>                                                          | RIKEN cDNA A230046K03 gene                                                            | 0006810 // transport // inferred from electronic annotation//0007032 // endosome org      |
| NM_001313711 | //          | 0.018  |       |       | 1.09   | 1.22   | 1.37   | 1.11        | <b>Prdx4</b>                                                                  | peroxiredoxin 4                                                                       | 0007283 // spermatogenesis // inferred from mutant phenotype//0008584 // male gon         |
| NM_010830    |             | 0.034  | ##### |       | -1.17  | -1.05  | 1.37   | 1.13        | <b>Msh6</b>                                                                   | mutS homolog 6 (E. coli)                                                              | 0000710 // meiotic mismatch repair // not recorded//0006281 // DNA repair // not rec      |
| NM_0011      | #####       |        |       |       | -1.04  | 1.03   | 1.37   | 1.29        | <b>Kif20a</b>                                                                 | kinesin family member 20A                                                             | 0000281 // mitotic cytokinesis // not recorded//0000910 // cytokinesis // not recorded/   |
| NM_0255      |             | 0.0445 | 0.036 |       | -1.14  | 1.02   | 1.37   | 1.26        | <b>Ostc</b>                                                                   | oligosaccharyltransferase complex subunit                                             |                                                                                           |
| NM_0011      |             | 0.0346 |       |       | 1.05   | 1.00   | 1.37   | 1.57        | <b>Cldn18</b>                                                                 | claudin 18                                                                            | 0016338 // calcium-independent cell-cell adhesion via plasma membrane cell-adhesion n     |
| NM_0011      |             | 0.0177 | 0.034 |       | -1.06  | 1.10   | 1.37   | 1.20        | <b>Glo1</b>                                                                   | glyoxalase 1                                                                          | 0005975 // carbohydrate metabolic process // not recorded//0006357 // regulation of t     |
| NM_033075    | //XR_       | 0.05   |       |       | -1.12  | -1.11  | 1.38   | 1.50        | <b>D17H6S56E-5</b>                                                            | DNA segment, Chr 17, human D6S56E 5                                                   | 0019058 // viral life cycle // inferred from electronic annotation                        |
| NM_172118    | //XM        | 0.019  |       |       | -1.14  | -1.03  | 1.38   | 1.39        | <b>Myf9</b>                                                                   | myosin, light polypeptide 9, regulatory                                               | 0070527 // platelet aggregation // not recorded                                           |
| NM_1832      |             | 0.0327 |       | 0.043 | -1.12  | 1.24   | 1.38   | 1.26        | <b>Wfdc21</b>                                                                 | WAP four-disulfide core domain 21                                                     | 0010466 // negative regulation of peptidase activity // inferred from electronic annotati |
| NM_009443    | //NM        | 0.011  |       |       | 1.04   | 1.21   | 1.38   | 1.23        | <b>Tgln1</b> // <b>Tgln2</b>                                                  | trans-golgi network protein//trans-golgi network protein 2                            | 0006895 // Golgi to endosome transport // not recorded                                    |
| NM_0011      |             | 0.0021 |       |       | 1.10   | 1.40   | 1.38   | 1.36        | <b>Dynlt1-ps1</b> // <b>Dynlt1a</b> // <b>Dynlt1b</b> // <b>Dynlt1c</b>       | dynein light chain Tctex-type 1, pseudogene 1//dynein light chain Tctex-type 1A//d    | 0000132 // establishment of mitotic spindle orientation // inferred from mutant phenoty   |
| NM_013463    |             | 0.015  |       |       | 1.10   | 1.13   | 1.38   | 1.22        | <b>Gla</b>                                                                    | galactosidase, alpha                                                                  | 0005975 // carbohydrate metabolic process // inferred from electronic annotation//000     |
| NM_007392    | //XM        | 0.049  |       |       | -1.25  | -1.13  | 1.38   | 1.12        | <b>Acta2</b>                                                                  | actin, alpha 2, smooth muscle, aorta                                                  | 0006936 // muscle contraction // not recorded//0008217 // regulation of blood pressur     |
| NM_0111      |             | 0.0274 | 0.005 |       | -1.03  | 1.25   | 1.39   | 1.00        | <b>Papola</b>                                                                 | poly (A) polymerase alpha                                                             | 0000398 // mRNA splicing, via spliceosome // ---//0006369 // termination of RNA poly      |
| NM_007856    | //XM        | 0.033  |       |       | 1.08   | 1.24   | 1.39   | -1.04       | <b>Dhcr7</b>                                                                  | 7-dehydrocholesterol reductase                                                        | 0001568 // blood vessel development // inferred from mutant phenotype//0006629 // l       |
| NM_001109971 | //          | 0.022  |       |       | -1.08  | 1.11   | 1.39   | -1.04       | <b>Sec61g</b>                                                                 | protein transport protein Sec61 subunit gamma//protein transport protein Sec61 sub    | 0006605 // protein targeting // inferred from electronic annotation//0006810 // transp    |
| NM_0011      |             | 0.0272 | 0.039 |       | 1.09   | 1.44   | 1.40   | 1.47        | <b>Magi3</b>                                                                  | membrane associated guanylate kinase, WW and PDZ domain containing 3                  | 0007165 // signal transduction // inferred from electronic annotation//0016310 // phos    |
| NM_0101      |             | 0.023  | 0.042 |       | 1.07   | 1.57   | 1.40   | 1.26        | <b>S1pr3</b>                                                                  | sphingosine-1-phosphate receptor 3                                                    | 0001816 // cytokine production // inferred from mutant phenotype//0003376 // sphing       |
| NM_001286062 | //          | 0.029  |       |       | 1.08   | 1.29   | 1.41   | 1.09        | <b>Angpt1</b>                                                                 | angiopoietin 1                                                                        | 0001525 // angiogenesis // inferred from direct assay//0001525 // angiogenesis // infer   |
| NM_173006    | //XM        | 0.023  |       |       | -1.02  | 1.13   | 1.41   | 1.31        | <b>Pon3</b>                                                                   | paraoxonase 3                                                                         | 0006470 // protein dephosphorylation // inferred from electronic annotation//0009636      |
| NM_008924    |             | 0.002  |       |       | -1.04  | 1.21   | 1.41   | 1.37        | <b>Prkar2a</b>                                                                | protein kinase, cAMP dependent regulatory, type II alpha                              | 0001932 // regulation of protein phosphorylation // inferred from electronic annotation/  |
| NM_019699    |             | 0.014  |       |       | 1.04   | 1.18   | 1.41   | 1.06        | <b>Fads2</b>                                                                  | fatty acid desaturase 2                                                               | 0006629 // lipid metabolic process // inferred from electronic annotation//0006631 // f   |
| NM_1725      |             | 0.0055 |       |       | 1.29   | 1.14   | 1.41   | 1.41        | <b>A730008H23Rik</b> // <b>Hjurp</b>                                          | RIKEN cDNA A730008H23 gene//Holliday junction recognition protein//RIKEN cDNA         | 0007049 // cell cycle // inferred from electronic annotation//0007059 // chromosome s     |
| NM_0011      |             | 0.0081 |       |       | 1.06   | 1.59   | 1.41   | 1.11        | <b>Gm10693</b> // <b>Gm14548</b> // <b>Lilra6</b> // <b>Pira1</b> // <b>F</b> | predicted pseudogene 10693//predicted gene 14548//leukocyte immunoglobulin-lik        | 0001782 // B cell homeostasis // inferred from mutant phenotype//0002250 // adaptiv       |
| NM_009610    |             | 0.009  | 0.037 |       | -1.50  | -1.14  | 1.42   | 1.19        | <b>Actg2</b>                                                                  | actin, gamma 2, smooth muscle, enteric                                                | 0010628 // positive regulation of gene expression // inferred from sequence or structural |
| NM_001277101 | //          | 0.033  |       |       | 1.07   | 1.18   | 1.42   | 1.25        | <b>Cops5</b>                                                                  | COP9 (constitutive photomorphogenic) homolog, subunit 5 (Arabidopsis thaliana)        | 0000338 // protein deneddylation // not recorded//0006355 // regulation of transcripti    |
| NM_011631    |             | 0.04   |       |       | -1.29  | -1.22  | 1.42   | 1.34        | <b>Hsp90b1</b>                                                                | heat shock protein 90, beta (Grp94), member 1                                         | 0001666 // response to hypoxia // not recorded//0006457 // protein folding // inferre     |
|              |             | 0.0042 |       |       | 1.67   | 4.36   | 1.42   | 1.10        | <b>Ighd</b>                                                                   | immunoglobulin heavy constant delta                                                   | 0016064 // immunoglobulin mediated immune response // inferred from mutant phenot         |
| NM_0084      |             | 0.0041 | 0.011 |       | -1.14  | 1.67   | 1.43   | 1.37        | <b>Lcn2</b>                                                                   | lipocalin 2                                                                           | 0002376 // immune system process // inferred from electronic annotation//0006810 //       |
| NM_0119      | #####       |        | 0.007 |       | 1.02   | 1.64   | 1.45   | 1.38        | <b>LOC102643033</b> // <b>Zfp146</b>                                          | zinc finger protein OZF//zinc finger protein 146                                      | 0006355 // regulation of transcription, DNA-templated // not recorded                     |
| NM_0013      |             | 0.0032 | 0.008 |       | -1.10  | 1.27   | 1.45   | 1.28        | <b>Mcm5</b>                                                                   | minichromosome maintenance deficient 5, cell division cycle 46 (S. cerevisiae)        | 0006260 // DNA replication // inferred from electronic annotation//0006270 // DNA rep     |
| NM_019802    | //XM        | 0.008  | 0.035 | -1.06 | 1.09   | 1.45   | 1.39   | <b>Gcxc</b> | gamma-glutamyl carboxylase                                                    | 0017187 // peptidyl-glutamic acid carboxylation // not recorded                       |                                                                                           |

| RefSeq       | Tri   | p 24h  | p 48h | p 72h | FD Air | FD 24h | FD 48h | FD 72h | Gene Symbol                                | Gene Title                                                                              | Gene Ontology Biological Process                                                                   |
|--------------|-------|--------|-------|-------|--------|--------|--------|--------|--------------------------------------------|-----------------------------------------------------------------------------------------|----------------------------------------------------------------------------------------------------|
| NM_0297      |       | 0.003  | 0.005 |       | -1.07  | 2.00   | 1.45   | -1.04  | <i>Lrg1</i>                                | leucine-rich alpha-2-glycoprotein 1                                                     | 0001938 // positive regulation of endothelial cell proliferation // inferred from mutant phenotype |
| NM_0010      | ##### |        |       |       | 1.00   | 1.37   | 1.45   | 1.24   | <i>Ddhd1</i>                               | DDHD domain containing 1                                                                | 0006629 // lipid metabolic process // inferred from electronic annotation//0016042 // lipid        |
| NM_1725      |       | 0.0073 |       |       | 1.30   | 1.14   | 1.46   | 1.45   | <i>6430706D22Rik//A730008H23Rik//Hjurp</i> | RIKEN cDNA 6430706D22 gene//RIKEN cDNA A730008H23 gene//Holliday junction               | 0007049 // cell cycle // inferred from electronic annotation//0007059 // chromosome segregation    |
| NM_0012      |       | 0.0025 | 0.015 |       | 1.01   | 1.87   | 1.46   | 1.24   | <i>Cd68</i>                                | CD68 antigen                                                                            | 0071310 // cellular response to organic substance // inferred from direct assay                    |
| NM_001025431 | ///   |        |       |       | 1.05   | 1.24   | 1.46   | 1.32   | <i>Btbd3</i>                               | BTB (POZ) domain containing 3                                                           | 0007399 // nervous system development // inferred from electronic annotation//00219                |
| NM_0254      |       | 0.0138 | 0.002 |       | -1.12  | 1.11   | 1.47   | 1.18   | <i>Ssr2</i>                                | signal sequence receptor, beta                                                          |                                                                                                    |
| NM_010111    | ///XM |        |       |       | 1.09   | 1.03   | 1.47   | 1.13   | <i>Efnb2</i>                               | ephrin B2                                                                               | 0001525 // angiogenesis // inferred from electronic annotation//0001945 // lymph vessel            |
| NM_008969    | ///XM |        |       |       | 1.04   | 1.40   | 1.47   | 1.19   | <i>Ptgs1</i>                               | prostaglandin-endoperoxide synthase 1                                                   | 0001516 // prostaglandin biosynthetic process // inferred from mutant phenotype//000               |
| NM_0011      |       | 0.0011 | 0.048 |       | 1.09   | 1.55   | 1.48   | 1.03   | <i>Acot7</i>                               | acyl-CoA thioesterase 7                                                                 | 0009062 // fatty acid catabolic process // inferred from direct assay//0015937 // coenzyme         |
| NM_0531      | ##### |        |       |       | -1.12  | 1.32   | 1.49   | 1.34   | <i>Glrx</i>                                | glutaredoxin                                                                            | 0006810 // transport // inferred from electronic annotation//0032024 // positive regulation        |
| NM_0013      |       | 0.0307 | 0.016 |       | 1.05   | 1.24   | 1.51   | 1.17   | <i>Mcm6</i>                                | minichromosome maintenance deficient 6 (MISS homolog, S. pombe) (S. cerevisiae)         | 0006260 // DNA replication // inferred from electronic annotation//0006268 // DNA un               |
| NM_026931    |       |        |       |       | -1.10  | -1.32  | 1.52   | 1.15   | <i>1810011010Rik</i>                       | RIKEN cDNA 1810011010 gene                                                              | 0002264 // endothelial cell activation involved in immune response // not recorded//00             |
| NM_0134      |       | 0.0142 | 0.043 |       | -1.21  | 1.49   | 1.52   | 1.06   | <i>Ankrd1</i>                              | ankyrin repeat domain 1 (cardiac muscle)                                                | 0000122 // negative regulation of transcription from RNA polymerase II promoter // not r           |
| NM_0012      |       | 0.009  | 0.03  |       | -1.07  | 1.65   | 1.52   | 1.02   | <i>Lilr4b//Lilrb4a</i>                     | leukocyte immunoglobulin-like receptor, subfamily B, member 4B//leukocyte immun         | 0002250 // adaptive immune response // inferred from electronic annotation//0002376                |
| NM_008302    |       |        |       |       | -1.30  | -1.30  | 1.53   | 1.51   | <i>Hsp90ab1</i>                            | heat shock protein 90 alpha (cytosolic), class B member 1                               | 0001890 // placenta development // inferred from mutant phenotype//0006457 // prot                 |
| NM_0011      | ##### |        |       |       | -1.26  | 1.33   | 1.53   | 1.09   | <i>Clec4n</i>                              | C-type lectin domain family 4, member n                                                 | 0002250 // adaptive immune response // inferred from electronic annotation//0002376                |
| NM_0011      |       | 0.0074 |       |       | -1.10  | 1.45   | 1.53   | 1.02   | <i>Itih4</i>                               | inter alpha-trypsin inhibitor, heavy chain 4                                            | 0006953 // acute-phase response // inferred from electronic annotation//0010466 // ne              |
| NM_0111      |       | 0.0435 |       |       | 1.65   | 1.25   | 1.53   | 1.93   | <i>Plod1</i>                               | procollagen-lysine, 2-oxoglutarate 5-dioxygenase 1                                      | 0001666 // response to hypoxia // inferred from electronic annotation//0008544 // epic             |
| NM_009226    |       |        |       |       | -1.07  | 1.15   | 1.53   | 1.17   | <i>Snrpd1</i>                              | small nuclear ribonucleoprotein D1                                                      | 0000245 // spliceosomal complex assembly // not recorded//0000387 // spliceosomal s                |
| NM_0093      |       | 0.0018 | 0.009 |       | -1.01  | 1.39   | 1.54   | 1.17   | <i>Tgfb1</i>                               | transforming growth factor, beta induced                                                | 0001525 // angiogenesis // inferred from electronic annotation//0002062 // chondrocyt              |
| NM_0098      |       | 0.0058 |       |       | -1.07  | 1.88   | 1.54   | 1.27   | <i>Chil3//Chil4</i>                        | chitinase-like 3//chitinase-like 4                                                      | 0000272 // polysaccharide catabolic process // inferred from electronic annotation//00             |
| NM_0011      |       | 0.0152 | 0.024 |       | -1.05  | 1.46   | 1.55   | 1.36   | <i>Il33</i>                                | interleukin 33                                                                          | 0002686 // negative regulation of leukocyte migration // inferred from genetic interacti           |
| NM_001313977 | ///   |        |       |       | 1.03   | 1.31   | 1.56   | 1.16   | <i>Prkch</i>                               | protein kinase C, eta                                                                   | 0006468 // protein phosphorylation // not recorded//0010744 // positive regulation of i            |
| NM_0116      |       | 0.0087 | 0.006 |       | -1.65  | 1.30   | 1.57   | 1.11   | <i>Tnc</i>                                 | tenascin C                                                                              | 0001649 // osteoblast differentiation // not recorded//0007155 // cell adhesion // infer           |
| NM_026835    |       |        |       |       | -1.09  | 1.14   | 1.58   | 1.15   | <i>Ms4a6d</i>                              | membrane-spanning 4-domains, subfamily A, member 6D                                     |                                                                                                    |
| NM_001159564 | ///   |        |       |       | 1.14   | 1.35   | 1.58   | 1.44   | <i>Itgb6</i>                               | integrin beta 6                                                                         | 0006954 // inflammatory response // inferred from mutant phenotype//0007155 // cell                |
| NM_0074      |       | 0.0087 | 0.015 |       | -1.25  | 1.36   | 1.58   | 1.11   | <i>Arg1</i>                                | arginase, liver                                                                         | 0000050 // urea cycle // not recorded//0001889 // liver development // inferred from e             |
| NM_009363    |       |        |       |       | -1.08  | -1.01  | 1.59   | 1.12   | <i>Tff2</i>                                | trefoil factor 2 (spasmodic protein 1)                                                  | 0008284 // positive regulation of cell proliferation // inferred from genetic interaction//i       |
| NM_0195      |       | 0.0397 |       |       | 1.29   | 1.84   | 1.60   | 1.11   | <i>Cxcl14</i>                              | chemokine (C-X-C motif) ligand 14                                                       | 0006955 // immune response // inferred from electronic annotation//0045662 // negati               |
| NM_0011      |       | 0.0054 |       |       | -1.03  | 1.47   | 1.61   | 1.48   | <i>Eif4a-ps4//Eif4a1</i>                   | eukaryotic translation initiation factor 4A, pseudogene 4//eukaryotic translation initi | 0006412 // translation // inferred from electronic annotation//0006413 // translational            |
| NM_011526    |       |        |       |       | -1.16  | 1.02   | 1.61   | 1.41   | <i>Tagln</i>                               | transgelin                                                                              | 0007010 // cytoskeleton organization // inferred from mutant phenotype//0030855 // e               |
| NM_001168525 | ///   |        |       |       | 1.01   | -1.01  | 1.67   | 1.48   | <i>Sgms1</i>                               | sphingomyelin synthase 1                                                                | 0006629 // lipid metabolic process // inferred from electronic annotation//0006665 // s            |
| NM_0011      |       | 0.0131 |       |       | 1.60   | 1.39   | 1.68   | 1.61   | <i>Wdfy1</i>                               | WD repeat and FYVE domain containing 1                                                  | 0034141 // positive regulation of toll-like receptor 3 signaling pathway // inferred from nr       |
| NM_008230    | ///XM |        |       |       | -1.05  | 1.31   | 1.68   | 1.22   | <i>Hdc</i>                                 | histidine decarboxylase                                                                 | 0001692 // histamine metabolic process // not recorded//0001694 // histamine biosynt               |
| NM_0010      |       | 0.013  | ##### |       | -1.04  | 1.79   | 1.70   | 1.04   | <i>Timp1</i>                               | tissue inhibitor of metalloproteinase 1                                                 | 0001775 // cell activation // not recorded//0007568 // aging // inferred from electronic           |
| NM_0012      |       | 0.0219 |       |       | 1.32   | 1.82   | 1.71   | 1.44   | <i>Pira1//Pira2//Pira6//Gm10693//Gm14</i>  | paired-Ig-like receptor A1//paired-Ig-like receptor A2//paired-Ig-like receptor A6//p   | 0001782 // B cell homeostasis // inferred from mutant phenotype//0002250 // adaptive               |
| NM_0010      |       | 0.0145 | 0.005 |       | 1.07   | 1.47   | 1.71   | 1.28   | <i>Lrp2</i>                                | low density lipoprotein receptor-related protein 2                                      | 0003281 // ventricular septum development // inferred from mutant phenotype//00067                 |
| NM_0012      |       | 0.0061 | 0.011 |       | 1.04   | 1.59   | 1.76   | 1.46   | <i>Fdps</i>                                | farnesyl diphosphate synthetase                                                         | 0006629 // lipid metabolic process // inferred from electronic annotation//0006694 // s            |
| NM_001166173 | ///   |        |       | 0.031 | 1.00   | 1.20   | 1.77   | 1.64   | <i>Dmkn</i>                                | dermokine                                                                               | 0030154 // cell differentiation // inferred from electronic annotation//1903575 // corni           |
| NM_001289462 | ///   |        |       |       | 1.10   | 1.37   | 1.81   | 1.64   | <i>Mme</i>                                 | membrane metallo endopeptidase                                                          | 0001822 // kidney development // inferred from sequence or structural similarity//0001             |
| NM_1451      | ##### |        |       |       | -1.16  | 2.24   | 1.81   | 1.48   | <i>Chil4//Chil3</i>                        | chitinase-like 4//chitinase-like 3                                                      | 0005975 // carbohydrate metabolic process // inferred from electronic annotation//000              |
| NM_001166672 | ///   |        |       |       | 1.18   | 2.04   | 1.83   | 1.34   | <i>Gm10693//Gm14548//Lilra6//Pira1//F</i>  | predicted pseudogene 10693//predicted gene 14548//leukocyte immunoglobulin-lik          | 0001782 // B cell homeostasis // inferred from mutant phenotype//0002250 // adaptive               |
| NM_0118      |       | 0.0038 | 0.002 | 0.047 | -1.06  | 2.42   | 1.84   | 1.35   | <i>Slc26a4</i>                             | solute carrier family 26, member 4                                                      | 0006810 // transport // inferred from electronic annotation//0006821 // chloride transp            |
| NM_1776      | ##### |        |       |       | 1.92   | 1.41   | 1.96   | 2.12   | <i>Cep104</i>                              | centrosomal protein 104                                                                 |                                                                                                    |
| NM_0012      |       | 0.0059 |       |       | 1.41   | 2.23   | 2.03   | 1.62   | <i>Pira1//Pira2//Pira6//Gm10693//Gm14</i>  | paired-Ig-like receptor A1//paired-Ig-like receptor A2//paired-Ig-like receptor A6//p   | 0001782 // B cell homeostasis // inferred from mutant phenotype//0002250 // adaptive               |
| NM_028757    | ///XM |        |       |       | 1.09   | 1.45   | 2.23   | 1.77   | <i>Nebl</i>                                | nebullette                                                                              | 0071691 // cardiac muscle thin filament assembly // inferred from sequence or structura            |
| NM_017474    | ///XM |        |       |       | -1.13  | 1.13   | 3.08   | 1.26   | <i>Clca1//Clca3a1</i>                      | chloride channel accessory 1//chloride channel accessory 3A1                            | 0006508 // proteolysis // inferred from electronic annotation//0006810 // transport // i           |
| XM_011238903 | ///   |        |       |       | 2.54   | 2.61   | 3.75   | 3.71   | <i>Gm37416//Gm39743//Gm40611//Gm4</i>      | predicted gene, 37416//predicted gene, 39743//predicted gene, 40611//predicted          | 0006278 // RNA-dependent DNA replication // inferred from electronic annotation//000               |



**Table S5. NFKB1-dependent basal lung genes.**

Selected genes varied  $\geq 1.5$ -fold between Nfkb1-WT and Nfkb1-KO mice (positive-higher in KO, negative-lower in KO). Moderated t-test ( $p < 0.05$ ). Order by fold difference (FD) between WT and KO mice exposed to air.

| RefSeq             | Transcript ID | p     | FD      | Air | Gene Symbol          | Gene Title                                                         | Gene Ontology                                                                                  |
|--------------------|---------------|-------|---------|-----|----------------------|--------------------------------------------------------------------|------------------------------------------------------------------------------------------------|
| NM_152839          |               | 0.006 | -20.028 |     | <i>Jchain</i>        | immunoglobulin joining chain                                       | 0001895 // retina homeostasis // inferred from electronic annotation//0002250 // adaptive i    |
|                    |               | 0.034 | -8.807  |     | <i>Igkv15-103</i>    | immunoglobulin kappa chain variable 15-103                         | 0006898 // receptor-mediated endocytosis // ---//0006910 // phagocytosis, recognition // ---   |
| NM_023835//XM_011  |               | 0.044 | -6.990  |     | <i>Trim12a</i>       | tripartite motif-containing 12A                                    | 0008270 // zinc ion binding // inferred from electronic annotation//0046872 // metal ion bin   |
| NM_139142          |               | 0.009 | -5.330  |     | <i>Slc6a20a</i>      | solute carrier family 6 (neurotransmitter transporter), member 21  | 0003333 // amino acid transmembrane transport // not recorded//0006810 // transport // i       |
| NM_018866          |               | 0.015 | -4.263  |     | <i>Cxcl13</i>        | chemokine (C-X-C motif) ligand 13                                  | 0002518 // lymphocyte chemotaxis across high endothelial venule // inferred from mutant pt     |
| NM_001281969//NM_  |               | 0.000 | -3.620  |     | <i>Glrh</i>          | glycine receptor, beta subunit                                     | 0001964 // startle response // not recorded//0001964 // startle response // inferred from se   |
| NM_001131054//NM_  |               | 0.000 | -3.506  |     | <i>Pttg1</i>         | pituitary tumor-transforming gene 1                                | 0001558 // regulation of cell growth // not recorded//0006281 // DNA repair // inferred fror   |
| NM_053128          |               | 0.011 | -3.332  |     | <i>Pcdhb3</i>        | protocadherin beta 3                                               | 0007155 // cell adhesion // inferred from electronic annotation//0007156 // homophilic cell    |
| NM_001146049//NM_  |               | 0.048 | -3.218  |     | <i>Htatip2</i>       | HIV-1 tat interactive protein 2, homolog (human)                   | 0001525 // angiogenesis // inferred from electronic annotation//0006915 // apoptotic proce     |
| NM_009234          |               | 0.010 | -3.214  |     | <i>Sox11</i>         | SRY (sex determining region Y)-box 11                              | 0000122 // negative regulation of transcription from RNA polymerase II promoter // inferred    |
| NM_001310602//XM_  |               | 0.041 | -3.163  |     | <i>Trim5</i>         | tripartite motif-containing 5                                      | 0002221 // pattern recognition receptor signaling pathway // ---//0016567 // protein ubiquit   |
| NM_001164612//NM_  |               | 0.001 | -3.009  |     | <i>Atp13a4</i>       | ATPase type 13A4                                                   | 0006812 // cation transport // inferred from electronic annotation//0006874 // cellular calci  |
| NM_153405//NM_171  |               | 0.000 | -2.895  |     | <i>Rbm45</i>         | RNA binding motif protein 45                                       | 0007275 // multicellular organismal development // inferred from electronic annotation//00     |
| NM_021050//XM_006  |               | 0.009 | -2.823  |     | <i>Cftr</i>          | cystic fibrosis transmembrane conductance regulator                | 0003254 // regulation of membrane depolarization // inferred from mutant phenotype//000        |
| NM_009052          |               | 0.001 | -2.817  |     | <i>Bex1</i>          | brain expressed gene 1                                             | 0002052 // positive regulation of neuroblast proliferation // not recorded//0007275 // multi   |
| NM_011704//XM_006  |               | 0.003 | -2.732  |     | <i>Vnn1</i>          | vanin 1                                                            | 0002526 // acute inflammatory response // inferred from direct assay//0002544 // chronic i     |
| NM_001081971       |               | 0.042 | -2.693  |     | <i>Ankrd63</i>       | ankyrin repeat domain 63                                           |                                                                                                |
| NM_010766          |               | 0.001 | -2.584  |     | <i>Marco</i>         | macrophage receptor with collagenous structure                     | 0002376 // immune system process // inferred from electronic annotation//0006897 // endc       |
| NM_008079//XM_006  |               | 0.036 | -2.581  |     | <i>Galc</i>          | galactosylceramidase                                               | 0005975 // carbohydrate metabolic process // inferred from electronic annotation//0006626      |
| NM_001202500//XM_  |               | 0.012 | -2.537  |     | <i>Armxc4</i>        | armadillo repeat containing, X-linked 4                            |                                                                                                |
| NM_026516          |               | 0.007 | -2.444  |     | <i>Tmem178</i>       | transmembrane protein 178                                          | 0016020 // membrane // inferred from electronic annotation//0016021 // integral compone        |
| NM_054084//XM_006  |               | 0.001 | -2.372  |     | <i>Calcb</i>         | calcitonin-related polypeptide, beta                               | 0005576 // extracellular region // inferred from electronic annotation                         |
| NM_029569//XM_006  |               | 0.045 | -2.360  |     | <i>Asb5</i>          | ankyrin repeat and SOCs box-containing 5                           | 0016567 // protein ubiquitination // inferred from electronic annotation//0035556 // intrac    |
| NM_009364//XM_006  |               | 0.024 | -2.345  |     | <i>Tfpi2</i>         | tissue factor pathway inhibitor 2                                  | 0007596 // blood coagulation // inferred from electronic annotation//0007599 // hemostasi      |
| NM_008730          |               | 0.006 | -2.300  |     | <i>Nptx1</i>         | neuronal pentraxin 1                                               | 0006839 // mitochondrial transport // not recorded//0035865 // cellular response to potassi    |
| NM_153389//NR_003  |               | 0.001 | -2.291  |     | <i>Atp10d</i>        | ATPase, class V, type 10D                                          | 0006810 // transport // inferred from electronic annotation//0006812 // cation transport //    |
| NM_022315//XM_006  |               | 0.010 | -2.287  |     | <i>Smoc2</i>         | SPARC related modular calcium binding 2                            | 0007165 // signal transduction // inferred from electronic annotation//0010811 // positive r   |
| NM_053169//XM_006  |               | 0.017 | -2.262  |     | <i>Trim16</i>        | tripartite motif-containing 16                                     | 0043966 // histone H3 acetylation // not recorded//0043967 // histone H4 acetylation // not    |
| NM_001111274//NM_  |               | 0.008 | -2.242  |     | <i>Igf1</i>          | insulin-like growth factor 1                                       | 0001649 // osteoblast differentiation // inferred from expression pattern//0001775 // cell ac  |
| NM_010140          |               | 0.039 | -2.202  |     | <i>Epha3</i>         | Eph receptor A3                                                    | 0003197 // endocardial cushion development // inferred from mutant phenotype//0006468          |
| NM_178931//XM_006  |               | 0.006 | -2.191  |     | <i>Tnfrsf14</i>      | tumor necrosis factor receptor superfamily, member 14 (herpesv     | 0002741 // positive regulation of cytokine secretion involved in immune response // inferred   |
| NM_023186          |               | 0.004 | -2.189  |     | <i>Chia1</i>         | chitinase, acidic 1                                                | 0000272 // polysaccharide catabolic process // inferred from electronic annotation//000237     |
| NM_001310659//NM_  |               | 0.028 | -2.144  |     | <i>Igfbp2</i>        | insulin-like growth factor binding protein 2                       | 0001558 // regulation of cell growth // inferred from electronic annotation//0007165 // sign   |
| NM_001164210//NM_  |               | 0.002 | -2.142  |     | <i>Sptssb</i>        | serine palmitoyltransferase, small subunit B                       | 0006629 // lipid metabolic process // inferred from electronic annotation//0006665 // sphin    |
| NM_001289755//NM_  |               | 0.004 | -2.131  |     | <i>Apoc3</i>         | apolipoprotein C-III                                               | 0006629 // lipid metabolic process // inferred from electronic annotation//0006641 // trigly   |
| NM_175473//XM_006  |               | 0.014 | -2.131  |     | <i>Fras1</i>         | Fraser syndrome 1 homolog (human)                                  | 0002009 // morphogenesis of an epithelium // inferred from mutant phenotype//0003338 //        |
| NM_001293800//NM_  |               | 0.048 | -2.104  |     | <i>Ocel1</i>         | occludin/ELL domain containing 1                                   |                                                                                                |
| NR_035452          |               | 0.002 | -2.096  |     | <i>Mir1931</i>       | microRNA 1931                                                      |                                                                                                |
| NM_021456          |               | 0.007 | -2.084  |     | <i>Ces1g</i>         | carboxylesterase 1G                                                | 0008152 // metabolic process // inferred from electronic annotation//0010468 // regulation     |
| NM_017399          |               | 0.016 | -2.080  |     | <i>Fabp1</i>         | fatty acid binding protein 1, liver                                | 0002230 // positive regulation of defense response to virus by host // not recorded//000681    |
| NM_025748//XM_011  |               | 0.045 | -2.075  |     | <i>Adat2</i>         | adenosine deaminase, tRNA-specific 2                               | 0002100 // tRNA wobble adenosine to inosine editing // inferred from electronic annotation//   |
| NM_001302531//NM_  |               | 0.031 | -2.029  |     | <i>Esr1</i>          | estrogen receptor 1 (alpha)                                        | 0001547 // antral ovarian follicle growth // inferred from mutant phenotype//0002064 // ep     |
| NR_015524          |               | 0.010 | -2.017  |     | <i>Cep83os</i>       | centrosomal protein 83, opposite strand                            |                                                                                                |
| NM_008689//XM_006  |               | 0.000 | -2.012  |     | <i>Nfkb1</i>         | nuclear factor of kappa light polypeptide gene enhancer in B cells | 0000122 // negative regulation of transcription from RNA polymerase II promoter // not recoi   |
| NM_013546//XM_011  |               | 0.017 | -1.970  |     | <i>Hebp1</i>         | heme binding protein 1                                             | 0042168 // heme metabolic process // inferred by curator                                       |
| NM_001081342//NM_  |               | 0.042 | -1.960  |     | <i>Adgrd1</i>        | adhesion G protein-coupled receptor D1                             | 0007166 // G cell surface receptor signaling pathway // inferred from electronic annotation//0 |
| NR_015487//NR_0276 |               | 0.000 | -1.956  |     | <i>A930005H10Rik</i> | RIKEN cDNA A930005H10 gene                                         |                                                                                                |
| NM_001252627//NM_  |               | 0.007 | -1.955  |     | <i>Cdh16</i>         | cadherin 16                                                        | 0007155 // cell adhesion // inferred from electronic annotation//0007156 // homophilic cell    |
| NM_001081328       |               | 0.021 | -1.953  |     | <i>Chsy3</i>         | chondroitin sulfate synthase 3                                     | 0008152 // metabolic process // inferred from electronic annotation                            |
| NM_001159401//NM_  |               | 0.009 | -1.953  |     | <i>Upp1</i>          | uridine phosphorylase 1                                            | 0006218 // uridine catabolic process // inferred from direct assay//0006220 // pyrimidine nu   |
| NM_177303//XM_011  |               | 0.010 | -1.952  |     | <i>Lrrn4</i>         | leucine rich repeat neuronal 4                                     | 0007616 // long-term memory // inferred from mutant phenotype//0008542 // visual learni        |

| RefSeq Transcript ID                                    | p     | FD Air | Gene Symbol                            | Gene Title                                                               | Gene Ontology                                                                                   |
|---------------------------------------------------------|-------|--------|----------------------------------------|--------------------------------------------------------------------------|-------------------------------------------------------------------------------------------------|
| NM_011606                                               | 0.005 | -1.923 | <b>Clec3b</b>                          | C-type lectin domain family 3, member b                                  | 0001501 // skeletal system development // inferred from mutant phenotype//0001503 // os         |
| NM_172757                                               | 0.027 | -1.897 | <b>Heatr3</b>                          | HEAT repeat containing 3                                                 |                                                                                                 |
| NM_001164733//NM_001164733                              | 0.010 | -1.890 | <b>Mpp6</b>                            | membrane protein, palmitoylated 6 (MAGUK p55 subfamily mem               | 0046037 // GMP metabolic process // inferred from sequence or structural similarity//00467      |
| NM_181420//XM_0001113560//NM_001113560                  | 0.029 | -1.875 | <b>Fn3krp</b>                          | fructosamine 3 kinase related protein                                    | 0016310 // phosphorylation // not recorded                                                      |
| NM_001113560//NM_001113560                              | 0.001 | -1.869 | <b>Glo1</b>                            | glyoxalase 1                                                             | 0005975 // carbohydrate metabolic process // not recorded//0006357 // regulation of trans       |
| NM_172471//XM_0001113560//NM_001113560                  | 0.005 | -1.845 | <b>Itih5</b>                           | inter-alpha (globulin) inhibitor H5                                      | 0010466 // negative regulation of peptidase activity // inferred from electronic annotation//   |
| NM_175309                                               | 0.013 | -1.830 | <b>Upk3b</b>                           | uropodin 3B                                                              | 0010629 // negative regulation of gene expression // not recorded//0046325 // negative reg      |
| NM_172399//XM_0001113560//NM_001113560                  | 0.032 | -1.830 | <b>Ndnf</b>                            | neuron-derived neurotrophic factor                                       | 0001525 // angiogenesis // not recorded//0001764 // neuron migration // not recorded//0         |
| XR_879970//XR_8799                                      | 0.000 | -1.806 | <b>Tnfsf13os</b>                       | tumor necrosis factor (ligand) superfamily, member 13, opposite strand   |                                                                                                 |
| NM_153127                                               | 0.002 | -1.803 | <b>Mmrrn2</b>                          | multimerin 2                                                             | 0001525 // angiogenesis // inferred from electronic annotation//0030948 // negative regula      |
| NM_001109988//NM_001109988                              | 0.002 | -1.791 | <b>Nrep</b>                            | neuronal regeneration related protein                                    | 0017015 // regulation of transforming growth factor beta receptor signaling pathway // inferr   |
| NM_001166377//NM_001166377                              | 0.023 | -1.771 | <b>Armxc1</b>                          | armadillo repeat containing, X-linked 1                                  | 0016020 // membrane // inferred from electronic annotation//0016021 // integral compone         |
| NM_001110850//NM_001110850                              | 0.045 | -1.770 | <b>Creml</b>                           | cAMP responsive element modulator                                        | 0006006 // glucose metabolic process // inferred from electronic annotation//0006351 // tra     |
| NM_010291                                               | 0.014 | -1.759 | <b>Gjb5</b>                            | gap junction protein, beta 5                                             | 0007154 // cell communication // inferred from electronic annotation//0060707 // trophobl       |
| NM_009022                                               | 0.046 | -1.736 | <b>Aldh1a2</b>                         | aldehyde dehydrogenase family 1, subfamily A2                            | 0001523 // retinoid metabolic process // traceable author statement//0001568 // blood ves       |
| NM_010809                                               | 0.000 | -1.730 | <b>Mmp3</b>                            | matrix metalloproteinase 3                                               | 0006508 // proteolysis // inferred from mutant phenotype//0006508 // proteolysis // not re      |
| NM_008409                                               | 0.012 | -1.722 | <b>Itm2a</b>                           | integral membrane protein 2A                                             | 0005515 // protein binding // inferred from electronic annotation                               |
| NM_001198565//NM_001198565                              | 0.014 | -1.712 | <b>Sulf1</b>                           | sulfatase 1                                                              | 0001502 // cartilage condensation // inferred from sequence or structural similarity//000182    |
| NM_001083917//NM_001083917                              | 0.000 | -1.710 | <b>Scn3b</b>                           | sodium channel, voltage-gated, type III, beta                            | 0006810 // transport // inferred from electronic annotation//0006811 // ion transport // inf    |
| NM_007562//XM_001111111//NM_001111111                   | 0.018 | -1.708 | <b>Bnc1</b>                            | basonuclin 1                                                             | 0006351 // transcription, DNA-templated // inferred from electronic annotation//0006355 //      |
| NM_007984                                               | 0.001 | -1.705 | <b>Fscn1</b>                           | fascin homolog 1, actin bundling protein (Strongylocentrotus purpuratus) | 0007015 // actin filament organization // inferred from electronic annotation//0007043 // ce    |
| NM_001111111//XM_001111111                              | 0.027 | -1.700 | <b>Atg16l2</b>                         | autophagy related 16-like 2 (S. cerevisiae)                              | 0000045 // autophagosome assembly // not recorded//0006810 // transport // inferred from        |
| NM_138683//XM_0001025364//NM_001025364                  | 0.029 | -1.692 | <b>Rspo1</b>                           | R-spondin 1                                                              | 0001934 // positive regulation of protein phosphorylation // not recorded//0002090 // regul     |
| NM_001025364//NM_001025364                              | 0.010 | -1.686 | <b>Rtn2</b>                            | reticulon 2 (Z-band associated protein)                                  | 0046324 // regulation of glucose import // inferred from mutant phenotype//0065002 // int       |
| NM_172793                                               | 0.034 | -1.684 | <b>Btnl9</b>                           | butyrophilin-like 9                                                      | 0016020 // membrane // inferred from electronic annotation//0016021 // integral compone         |
| NM_001111051//NM_001111051                              | 0.014 | -1.682 | <b>Dclk1</b>                           | doublecortin-like kinase 1                                               | 0001764 // neuron migration // inferred from genetic interaction//0006468 // protein phosph     |
| NM_001025564//NR_001025564                              | 0.010 | -1.680 | <b>Gm15698</b>                         | transcription elongation factor B (SIII), polypeptide 2 pseudogene       | 0006368 // transcription elongation from RNA polymerase II promoter // not recorded             |
| NM_001164528//XM_000134102//XM_0001276446//NM_001276446 | 0.020 | -1.679 | <b>Ildr2</b>                           | immunoglobulin-like domain containing receptor 2                         | 0009749 // response to glucose // inferred from mutant phenotype//0030073 // insulin secr       |
| NM_134102//XM_0001276446//NM_001276446                  | 0.000 | -1.676 | <b>Pla1a</b>                           | phospholipase A1 member A                                                | 0006629 // lipid metabolic process // inferred from electronic annotation//0016042 // lipid c   |
| NM_001276446//NM_001276446                              | 0.001 | -1.663 | <b>Alad</b>                            | aminolevulinatase, delta-, dehydratase                                   | 0001666 // response to hypoxia // inferred from electronic annotation//0006779 // porphyri      |
| NM_020052                                               | 0.043 | -1.658 | <b>Scube2</b>                          | signal peptide, CUB domain, EGF-like 2                                   | 0005509 // calcium ion binding // inferred from electronic annotation//0042802 // identical     |
| NM_027391                                               | 0.045 | -1.655 | <b>Iyd</b>                             | iodotyrosine deiodinase                                                  | 0055114 // oxidation-reduction process // inferred from electronic annotation                   |
| NM_001166173//NM_001166173                              | 0.037 | -1.654 | <b>Dmkn</b>                            | dermokine                                                                | 0030154 // cell differentiation // inferred from electronic annotation//1903575 // cornified e  |
| NM_011758                                               | 0.012 | -1.651 | <b>Zfp39</b>                           | zinc finger protein 39                                                   | 0006351 // transcription, DNA-templated // inferred from electronic annotation//0006355 //      |
| NM_001205369//NM_001205369                              | 0.033 | -1.645 | <b>Casc4</b>                           | cancer susceptibility candidate 4                                        | 0005794 // Golgi apparatus // not recorded//0016020 // membrane // inferred from electror       |
| NM_013813//XM_0001026864//NM_001026864                  | 0.008 | -1.634 | <b>Epb41b</b>                          | erythrocyte membrane protein band 4.1 like 3                             | 0001558 // regulation of cell growth // inferred from electronic annotation//0002175 // prot    |
| NM_026864                                               | 0.028 | -1.634 | <b>Rasl11a</b>                         | RAS-like, family 11, member A                                            | 0006351 // transcription, DNA-templated // inferred from electronic annotation//0006355 //      |
| NM_028130//XM_0001029360//NM_001029360                  | 0.017 | -1.631 | <b>Zfp157</b>                          | zinc finger protein 157                                                  | 0006355 // regulation of transcription, DNA-templated // inferred from electronic annotation    |
| NM_029360                                               | 0.020 | -1.626 | <b>Tm4sf5</b>                          | transmembrane 4 superfamily member 5                                     | 0016020 // membrane // inferred from electronic annotation//0016021 // integral compone         |
| NM_175140//XM_0001025949//XM_00010516                   | 0.045 | -1.624 | <b>Chst8</b>                           | carbohydrate (N-acetylgalactosamine 4-O) sulfotransferase 8              | 0005975 // carbohydrate metabolic process // inferred from electronic annotation//000679C       |
| NM_025949//XM_00010516                                  | 0.040 | -1.624 | <b>Rps6ka6</b>                         | ribosomal protein S6 kinase polypeptide 6                                | 0006417 // regulation of translation // not recorded//0006468 // protein phosphorylation //     |
| NM_010516                                               | 0.001 | -1.620 | <b>Cyr61</b>                           | cysteine rich protein 61                                                 | 0001558 // regulation of cell growth // inferred from electronic annotation//0001649 // oste    |
| NM_008083                                               | 0.042 | -1.619 | <b>Gap43</b>                           | growth associated protein 43                                             | 0007275 // multicellular organismal development // inferred from electronic annotation//00      |
| NM_175666                                               | 0.002 | -1.617 | <b>Hist2h2bb</b>                       | histone cluster 2, H2bb                                                  | 0006334 // nucleosome assembly // not recorded                                                  |
| NM_001166364//NM_001166364                              | 0.010 | -1.612 | <b>Fam219b</b>                         | family with sequence similarity 219, member B                            |                                                                                                 |
| NM_001024720//XM_001013476                              | 0.007 | -1.607 | <b>Hmgn1</b>                           | hemicentin 1                                                             | 0005509 // calcium ion binding // inferred from electronic annotation                           |
| NM_013476                                               | 0.010 | -1.602 | <b>Ar</b>                              | androgen receptor                                                        | 0001701 // in utero embryonic development // inferred from mutant phenotype//0003073 /          |
| NM_001313978//NM_001313978                              | 0.019 | -1.596 | <b>Colec11</b>                         | collectin sub-family member 11                                           | 0007275 // multicellular organismal development // inferred from electronic annotation//00      |
| NM_001017525//NM_001017525                              | 0.010 | -1.596 | <b>Btbdl1</b>                          | BTB (POZ) domain containing 11                                           | 0006395 // SMAD protein signal transduction // inferred from direct assay                       |
| NM_001039536//NM_001039536                              | 0.008 | -1.593 | <b>Pigl</b>                            | phosphatidylinositol glycan anchor biosynthesis, class L                 | 0006506 // GPI anchor biosynthetic process // not recorded                                      |
| NM_028095//XM_0001025208//NM_001025208                  | 0.004 | -1.589 | <b>Mettl10</b>                         | methyltransferase like 10                                                | 0032259 // methylation // inferred from electronic annotation                                   |
| NM_001025208//NM_001025208                              | 0.026 | -1.584 | <b>Gm38417//H2-BI//H2-D4//H2-T3-II</b> | predicted gene, 38417//histocompatibility 2, blastocyst//histoc          | 0001916 // positive regulation of T cell mediated cytotoxicity // inferred from direct assay//C |
| NM_001136077//NM_001136077                              | 0.037 | -1.584 | <b>Enpp2</b>                           | ectonucleotide pyrophosphatase/phosphodiesterase 2                       | 0001953 // negative regulation of cell-matrix adhesion // not recorded//0006629 // lipid me     |
| NM_013912                                               | 0.002 | -1.584 | <b>Apln</b>                            | apelin                                                                   | 0002026 // regulation of the force of heart contraction // not recorded//0007165 // signal tr   |

| RefSeq Transcript ID | p     | FD Air | Gene Symbol                 | Gene Title                                                           | Gene Ontology                                                                                   |
|----------------------|-------|--------|-----------------------------|----------------------------------------------------------------------|-------------------------------------------------------------------------------------------------|
| NM_001136260//NM     | 0.033 | -1.580 | <b>Slc4a4</b>               | solute carrier family 4 (anion exchanger), member 4                  | 0006810 // transport // inferred from electronic annotation//0006811 // ion transport // inf    |
| NM_001141933//NM     | 0.024 | -1.574 | <b>Nkain4</b>               | Na+/K+ transporting ATPase interacting 4                             | 0002028 // regulation of sodium ion transport // --                                             |
| NM_011985//XM_00     | 0.005 | -1.574 | <b>Mmp23</b>                | matrix metalloproteinase 23                                          | 0000003 // reproduction // inferred from sequence or structural similarity//0000003 // repr     |
| NM_001081324//XM     | 0.030 | -1.571 | <b>Neto2</b>                | neuropilin (NRP) and tolloid (TLL)-like 2                            | 2000312 // regulation of kainate selective glutamate receptor activity // inferred from electro |
| NM_007646            | 0.011 | -1.567 | <b>Cd38</b>                 | CD38 antigen                                                         | 0001666 // response to hypoxia // not recorded//0007204 // positive regulation of cytosolic     |
| NM_024273//XM_00     | 0.001 | -1.565 | <b>Timmdc1</b>              | translocase of inner mitochondrial membrane domain containing        | 0005515 // protein binding // inferred from electronic annotation                               |
| NM_009738//XM_01     | 0.019 | -1.562 | <b>Bche</b>                 | butyrylcholinesterase                                                | 0006581 // acetylcholine catabolic process // ---//0007268 // synaptic transmission // ---//0   |
| NM_028097//XM_00     | 0.038 | -1.551 | <b>Tmem68</b>               | transmembrane protein 68                                             | 0008152 // metabolic process // inferred from electronic annotation                             |
| NM_170778//XM_01     | 0.031 | -1.547 | <b>Dpyd</b>                 | dihydropyrimidine dehydrogenase                                      | 0006145 // purine nucleobase catabolic process // not recorded//0006208 // pyrimidine nuc       |
| NM_001308535//NM     | 0.003 | -1.538 | <b>Il2rg</b>                | interleukin 2 receptor, gamma chain                                  | 0010468 // regulation of gene expression // inferred from mutant phenotype//0010628 // p        |
| NM_001165939//NM     | 0.011 | -1.535 | <b>Tshb</b>                 | thyroid stimulating hormone, beta subunit                            | 0033189 // response to vitamin A // inferred from electronic annotation//0043627 // respon      |
| NM_001083912//NM     | 0.025 | -1.530 | <b>Plekhg2</b>              | pleckstrin homology domain containing, family G (with RhoGef do      | 0035023 // regulation of Rho protein signal transduction // inferred from electronic annotatio  |
| NM_009778//XM_01     | 0.004 | -1.530 | <b>C3</b>                   | complement component 3                                               | 0001798 // positive regulation of type Ila hypersensitivity // inferred from mutant phenotype,  |
| NM_011352//XM_00     | 0.015 | -1.528 | <b>Sema7a</b>               | sema domain, immunoglobulin domain (Ig), and GPI membrane a          | 0001649 // osteoblast differentiation // not recorded//0001755 // neural crest cell migratio    |
| NM_018874            | 0.013 | -1.528 | <b>Pnliprp1</b>             | pancreatic lipase related protein 1                                  | 0006629 // lipid metabolic process // inferred from electronic annotation                       |
| NM_001310635//NM     | 0.015 | -1.527 | <b>Crispld2</b>             | cysteine-rich secretory protein LCCL domain containing 2             | 0030198 // extracellular matrix organization // inferred from direct assay//0030324 // lung c   |
| NM_008727//XM_00     | 0.001 | -1.524 | <b>Npr1</b>                 | natriuretic peptide receptor 1                                       | 0006182 // cGMP biosynthetic process // not recorded//0006468 // protein phosphorylation        |
| NM_024472            | 0.005 | -1.523 | <b>Cptp</b>                 | ceramide-1-phosphate transfer protein                                | 0006810 // transport // inferred from electronic annotation//0006869 // lipid transport // in   |
| NM_199446//XM_00     | 0.010 | -1.521 | <b>Phkb</b>                 | phosphorylase kinase beta                                            | 0005975 // carbohydrate metabolic process // inferred from electronic annotation//000597        |
| NM_001252563//NM     | 0.029 | -1.519 | <b>Matn4</b>                | matrilin 4                                                           | 0048678 // response to axon injury // inferred from direct assay                                |
| NM_001033416//XM     | 0.036 | -1.516 | <b>Gal3st4</b>              | galactose-3-O-sulfotransferase 4                                     | 0009058 // biosynthetic process // inferred from electronic annotation//0009101 // glycoprc     |
| NM_021344//XR_387    | 0.026 | -1.515 | <b>Tesc</b>                 | tescalcin                                                            | 0006810 // transport // inferred from electronic annotation//0006883 // cellular sodium ion     |
| NM_001289780//NM     | 0.005 | -1.514 | <b>Pus7</b>                 | pseudouridylyl synthase 7 homolog (S. cerevisiae)                    | 0001522 // pseudouridine synthesis // inferred from electronic annotation//0001522 // pse       |
| NM_001290457//NM     | 0.002 | -1.512 | <b>Relb</b>                 | avian reticuloendotheliosis viral (v-rel) oncogene related B         | 0000122 // negative regulation of transcription from RNA polymerase II promoter // not recoi    |
| NM_011823//XM_00     | 0.036 | -1.510 | <b>Gpr34</b>                | G protein-coupled receptor 34                                        | 0007165 // signal transduction // inferred from electronic annotation//0007186 // G-protein     |
| NM_001039201//NM     | 0.024 | -1.510 | <b>Hdhd2</b>                | haloacid dehalogenase-like hydrolase domain containing 2             | 0005515 // protein binding // inferred from electronic annotation//0019899 // enzyme bindi      |
| NM_001025373         | 0.038 | -1.507 | <b>Zfp943</b>               | zinc finger prtoein 943                                              | 0006355 // regulation of transcription, DNA-templated // inferred from electronic annotation    |
| NM_008939            | 0.007 | -1.505 | <b>Prss12</b>               | protease, serine 12 neurotrypsin (motopsin)                          | 0006508 // proteolysis // inferred from direct assay//0006508 // proteolysis // inferred from   |
| NM_0111075//XM_00    | 0.024 | -1.499 | <b>Abcb1b</b>               | ATP-binding cassette, sub-family B (MDR/TAP), member 1B              | 0006810 // transport // not recorded//0006855 // drug transmembrane transport // not rec        |
| NM_172947//XM_00     | 0.002 | -1.497 | <b>Lsm12</b>                | LSM12 homolog (S. cerevisiae)                                        | 0000733 // DNA strand renaturation // not recorded//0006338 // chromatin remodeling // r        |
| NM_001290708//NM     | 0.046 | -1.496 | <b>Smarca1</b>              | SWI/SNF related, matrix associated, actin dependent regulator of     | 0006355 // regulation of transcription, DNA-templated // inferred from electronic annotation    |
| NM_001008549//XM     | 0.036 | -1.495 | <b>Zfp658</b>               | zinc finger protein 658                                              | 0006810 // transport // inferred from electronic annotation//0006886 // intracellular protein   |
| NM_173781//XM_00     | 0.028 | -1.495 | <b>Rab6b</b>                | RAB6B, member RAS oncogene family                                    | 0055114 // oxidation-reduction process // inferred from electronic annotation                   |
| NM_001013785//XR_    | 0.001 | -1.492 | <b>Akr1c19</b>              | aldo-keto reductase family 1, member C19                             | 0006898 // receptor-mediated endocytosis // ---//0006898 // receptor-mediated endocytosi        |
| NM_138672//XM_00     | 0.028 | -1.489 | <b>Stab1</b>                | stabilin 1                                                           | 0006810 // transport // inferred from electronic annotation//0006811 // ion transport // inf    |
| NM_018732//XM_00     | 0.019 | -1.488 | <b>Scn3a</b>                | sodium channel, voltage-gated, type III, alpha                       | 0006810 // transport // inferred from electronic annotation//0006835 // dicarboxylic acid tr    |
| NM_009199            | 0.021 | -1.488 | <b>Slc1a1</b>               | solute carrier family 1 (neuronal/epithelial high affinity glutamate | 0046579 // positive regulation of Ras protein signal transduction // not recorded               |
| NM_001168505//NM     | 0.006 | -1.486 | <b>Shoc2</b>                | soc-2 (suppressor of clear) homolog (C. elegans)                     | 0006351 // transcription, DNA-templated // inferred from electronic annotation//0006355 /,      |
| NM_013705            | 0.005 | -1.486 | <b>Zfp30</b>                | zinc finger protein 30                                               | 0010951 // negative regulation of endopeptidase activity // inferred from electronic annotati   |
| NM_001243008//NM     | 0.019 | -1.485 | <b>Col6a3</b>               | collagen, type VI, alpha 3                                           | 0006351 // transcription, DNA-templated // inferred from electronic annotation//0006355 /,      |
| NM_001110100//NM     | 0.049 | -1.485 | <b>Banp</b>                 | BTG3 associated nuclear protein                                      | 0006508 // proteolysis // inferred from electronic annotation                                   |
| NM_152812//XM_01     | 0.038 | -1.484 | <b>Otud6b</b>               | OTU domain containing 6B                                             | 0006355 // regulation of transcription, DNA-templated // not recorded//0007409 // axonog        |
| NM_001163847//NM     | 0.042 | -1.480 | <b>Ntn3//Tbc1d24</b>        | netrin 3//TBC1 domain family, member 24                              | 0001702 // gastrulation with mouth forming second // non-traceable author statement//000        |
| NM_001037842//NM     | 0.007 | -1.480 | <b>Cml3//Gm1128//Gm4477</b> | camel-like 3//predicted gene 1128//predicted gene 4477               | 0006810 // transport // inferred from electronic annotation//0008643 // carbohydrate trans      |
| NM_001033633         | 0.048 | -1.480 | <b>Slc2a13</b>              | solute carrier family 2 (facilitated glucose transporter), member 1  | 0007520 // myoblast fusion // inferred from direct assay//0007520 // myoblast fusion // infe    |
| NM_023320//XM_00     | 0.006 | -1.480 | <b>Plekho1</b>              | pleckstrin homology domain containing, family O member 1             | 0000122 // negative regulation of transcription from RNA polymerase II promoter // inferred     |
| NM_011221            | 0.005 | -1.477 | <b>Purb</b>                 | purine rich element binding protein B                                | 0006508 // proteolysis // inferred from electronic annotation//0007229 // integrin-mediatec     |
| NM_001081401//NM     | 0.018 | -1.477 | <b>Adamts3</b>              | a disintegrin-like and metalloproteinase (reprolysin type) with thr  | 0008535 // respiratory chain complex IV assembly // not recorded//0015031 // protein trans      |
| NM_001033310//NM     | 0.022 | -1.474 | <b>Cox18</b>                | cytochrome c oxidase assembly protein 18                             | 0008152 // metabolic process // inferred from electronic annotation                             |
| NM_024257            | 0.002 | -1.472 | <b>Hdhd3</b>                | haloacid dehalogenase-like hydrolase domain containing 3             | 0006810 // transport // inferred from electronic annotation//0006811 // ion transport // inf    |
| NM_134160//XM_00     | 0.004 | -1.470 | <b>Mcoln3</b>               | mucoilin 3                                                           | 0051443 // positive regulation of ubiquitin-protein transferase activity // not recorded        |
| NM_001042592//NM     | 0.015 | -1.469 | <b>Arrdc4</b>               | arrestin domain containing 4                                         | 0001764 // neuron migration // not recorded//0003407 // neural retina development // infe       |
| NM_001253754//NM     | 0.029 | -1.469 | <b>Gpm6a</b>                | glycoprotein m6a                                                     | 0006508 // proteolysis // inferred from direct assay//0008152 // metabolic process // inferre   |
| NM_028279//XM_00     | 0.009 | -1.468 | <b>Naalad2</b>              | N-acetylated alpha-linked acidic dipeptidase 2                       |                                                                                                 |

| RefSeq Transcript ID                                             | p     | FD Air | Gene Symbol                                      | Gene Title                                                                                      | Gene Ontology                                                                                                                                                                                                          |
|------------------------------------------------------------------|-------|--------|--------------------------------------------------|-------------------------------------------------------------------------------------------------|------------------------------------------------------------------------------------------------------------------------------------------------------------------------------------------------------------------------|
| NM_025864                                                        | 0.006 | -1.467 | <b>Tmem206</b>                                   | transmembrane protein 206                                                                       | 0009986 // cell surface // not recorded///0016020 // membrane // inferred from electronic annotation                                                                                                                   |
| NM_029658                                                        | 0.008 | -1.467 | <b>Fam101b</b>                                   | family with sequence similarity 101, member B                                                   | 0001837 // epithelial to mesenchymal transition // inferred from genetic interaction///00300                                                                                                                           |
| NM_001205095///XM_001313897///NM_133972///XM_011                 | 0.014 | -1.467 | <b>Gm4944</b>                                    | predicted gene 4944                                                                             | 0006355 // regulation of transcription, DNA-templated // not recorded                                                                                                                                                  |
| NM_133972///XM_011                                               | 0.008 | -1.466 | <b>Lta4h</b>                                     | leukotriene A4 hydrolase                                                                        | 0006508 // proteolysis // inferred from electronic annotation///0006691 // leukotriene metal                                                                                                                           |
| NM_139063///XM_006                                               | 0.044 | -1.466 | <b>Armc6</b>                                     | armadillo repeat containing 6                                                                   | 0002244 // hematopoietic progenitor cell differentiation // inferred from genetic interaction                                                                                                                          |
| NM_026062                                                        | 0.005 | -1.463 | <b>Bloc1s5</b>                                   | biogenesis of lysosomal organelles complex-1, subunit 5, muted                                  | 0008089 // anterograde axon cargo transport // inferred from mutant phenotype///0016192                                                                                                                                |
| NM_019472///XM_006                                               | 0.021 | -1.462 | <b>Fam69a</b>                                    | family with sequence similarity 69, member A                                                    | 0005515 // protein binding // inferred from physical interaction                                                                                                                                                       |
| NM_026504///XR_387                                               | 0.012 | -1.461 | <b>Myo10</b>                                     | myosin X                                                                                        | 0006810 // transport // inferred from electronic annotation///0007165 // signal transduction                                                                                                                           |
| NR_045175                                                        | 0.017 | -1.460 | <b>Coq5</b>                                      | coenzyme Q5 homolog, methyltransferase (yeast)                                                  | 0006744 // ubiquinone biosynthetic process // inferred from electronic annotation///0032251                                                                                                                            |
| NM_146106///XM_011                                               | 0.015 | -1.459 | <b>Smc2os</b>                                    | structural maintenance of chromosomes 2, opposite strand                                        |                                                                                                                                                                                                                        |
| NM_026796///XM_006                                               | 0.041 | -1.457 | <b>Lyplal1</b>                                   | lysophospholipase-like 1                                                                        | 0002084 // protein depalmitoylation // inferred from mutant phenotype///0042997 // negative regulation of transcription from RNA polymerase II promoter // not recorded                                                |
| NM_008369///XM_006                                               | 0.030 | -1.457 | <b>Smyd2</b>                                     | SET and MYND domain containing 2                                                                | 0019221 // cytokine-mediated signaling pathway // inferred from electronic annotation                                                                                                                                  |
| NM_001159564///NM_029494///XM_006                                | 0.010 | -1.455 | <b>Ii3ra</b>                                     | interleukin 3 receptor, alpha chain                                                             | 0006954 // inflammatory response // inferred from mutant phenotype///0007155 // cell adhesion                                                                                                                          |
| NM_176952///XM_006                                               | 0.034 | -1.455 | <b>Itgb6</b>                                     | integrin beta 6                                                                                 | 0006886 // intracellular protein transport // not recorded///0007030 // Golgi organization //                                                                                                                          |
| NM_023245                                                        | 0.015 | -1.452 | <b>Rab30</b>                                     | RAB30, member RAS oncogene family                                                               | 0008033 // tRNA processing // inferred from electronic annotation///0008152 // metabolic process                                                                                                                       |
| NR_033626                                                        | 0.033 | -1.450 | <b>6430573F11Rik</b>                             | RIKEN cDNA 6430573F11 gene                                                                      | 0008360 // regulation of cell shape // inferred from electronic annotation                                                                                                                                             |
| NM_001289428///NM_008184///XM_006                                | 0.003 | -1.450 | <b>Palmd</b>                                     | palmdelphin                                                                                     | 0006810 // transport // inferred from electronic annotation///0006811 // ion transport // inferred from mutant phenotype///0002250 // adaptive immune response                                                         |
| NM_008184///XM_006                                               | 0.005 | 1.451  | <b>1810010D01Rik</b>                             | RIKEN cDNA 1810010D01 gene                                                                      | 0001782 // B cell homeostasis // inferred from mutant phenotype///0002250 // adaptive immune response                                                                                                                  |
| NM_029152                                                        | 0.005 | 1.452  | <b>Pira1///Pira2///Pira6///Gm10693///Gm10694</b> | paired-Ig-like receptor A1///paired-Ig-like receptor A2///paired-Ig-like receptor A3            | 0008152 // metabolic process // inferred from electronic annotation                                                                                                                                                    |
| NM_008030                                                        | 0.016 | 1.454  | <b>Gstm6</b>                                     | glutathione S-transferase, mu 6                                                                 | 0005509 // calcium ion binding // inferred from electronic annotation                                                                                                                                                  |
| NM_001313712///NM_001040005///XM_153598                          | 0.010 | 1.462  | <b>Fmo3</b>                                      | flavin containing monooxygenase 3                                                               | 0017144 // drug metabolic process // not recorded///0055114 // oxidation-reduction process                                                                                                                             |
| NM_001040005///XM_153598                                         | 0.001 | 1.467  | <b>Sp100</b>                                     | nuclear antigen Sp100                                                                           | 0000723 // telomere maintenance // inferred from sequence or structural similarity///000663                                                                                                                            |
| NM_001037138///NM_001161667///NM_001002898///NM_0300098///XM_006 | 0.003 | 1.469  | <b>Rnf213</b>                                    | ring finger protein 213                                                                         | 0008152 // metabolic process // inferred from electronic annotation///0016567 // protein ubiquitination                                                                                                                |
| NM_001161667///NM_001002898///NM_0300098///XM_006                | 0.006 | 1.469  | <b>Ugt2b34</b>                                   | UDP glucuronosyltransferase 2 family, polypeptide B34                                           | 0008152 // metabolic process // inferred from electronic annotation///0009813 // flavonoid biosynthesis                                                                                                                |
| NM_001134399///NM_001161775///NM_011452                          | 0.015 | 1.471  | <b>Cd300lb</b>                                   | CD300 antigen like family member B                                                              | 0002376 // immune system process // inferred from electronic annotation///0002446 // neutrophil chemotaxis                                                                                                             |
| NM_001161775///NM_011452                                         | 0.011 | 1.472  | <b>Acox2</b>                                     | acyl-Coenzyme A oxidase 2, branched chain                                                       | 0006629 // lipid metabolic process // inferred from electronic annotation///0006631 // fatty acid oxidation                                                                                                            |
| NM_001002898///NM_0300098///XM_006                               | 0.003 | 1.474  | <b>Sirpb1a///Sirpb1b</b>                         | signal-regulatory protein beta 1-like///signal-regulatory protein beta 1-like                   | 0035556 // intracellular signal transduction // inferred from direct assay///0050766 // positive regulation of transcription from RNA polymerase II promoter                                                           |
| NM_001134399///NM_001161775///NM_011452                          | 0.025 | 1.481  | <b>Rnase6</b>                                    | ribonuclease, RNase A family, 6                                                                 | 0008152 // metabolic process // inferred from electronic annotation///0009305 // nucleic acid metabolic process                                                                                                        |
| NM_001134399///NM_001161775///NM_011452                          | 0.009 | 1.483  | <b>Megf11</b>                                    | multiple EGF-like-domains 11                                                                    | 0010842 // retina layer formation // inferred from mutant phenotype///0034109 // homotypic cell-cell adhesion                                                                                                          |
| NM_001161775///NM_011452                                         | 0.012 | 1.483  | <b>Myh11</b>                                     | myosin, heavy polypeptide 11, smooth muscle                                                     | 0006939 // smooth muscle contraction // inferred from direct assay///0006939 // smooth muscle contraction                                                                                                              |
| NM_008630                                                        | 0.002 | 1.487  | <b>Serpinh9b</b>                                 | serine (or cysteine) peptidase inhibitor, clade B, member 9b                                    | 0010951 // negative regulation of endopeptidase activity // not recorded///0019835 // cytolysis                                                                                                                        |
| NM_001205313///NM_001113468///NR_001313970///NM_010734           | 0.006 | 1.487  | <b>Stat1</b>                                     | signal transducer and activator of transcription 1                                              | 0006882 // cellular zinc ion homeostasis // inferred from mutant phenotype///0007263 // nitric oxide production                                                                                                        |
| NM_001113468///NR_001313970///NM_010734                          | 0.000 | 1.487  | <b>Stat1</b>                                     | signal transducer and activator of transcription 1                                              | 0000122 // negative regulation of transcription from RNA polymerase II promoter // inferred from mutant phenotype///0007186 // G-protein coupled receptor signaling pathway // inferred from electronic annotation     |
| NM_001113468///NR_001313970///NM_010734                          | 0.002 | 1.489  | <b>Vmn2r29</b>                                   | vomer nasal 2, receptor 29                                                                      | 0007186 // G-protein coupled receptor signaling pathway // inferred from electronic annotation                                                                                                                         |
| NM_001313970///NM_010734                                         | 0.025 | 1.490  | <b>Ppp1r1b</b>                                   | protein phosphatase 1, regulatory (inhibitor) subunit 1B                                        | 0001975 // response to amphetamine // inferred from genetic interaction///0006351 // transcription                                                                                                                     |
| NM_001164289///NM_001103156///NM_009999                          | 0.004 | 1.490  | <b>Lst1</b>                                      | leukocyte specific transcript 1                                                                 | 0000902 // cell morphogenesis // inferred from electronic annotation///0002376 // immune response                                                                                                                      |
| NM_001164289///NM_001103156///NM_009999                          | 0.000 | 1.490  | <b>Phf11c///Phf11d</b>                           | PHD finger protein 11C///PHD finger protein 11D                                                 | 0006351 // transcription, DNA-templated // inferred from electronic annotation///0006355 // transcription                                                                                                              |
| NM_001103156///NM_009999                                         | 0.001 | 1.496  | <b>Steap2</b>                                    | six transmembrane epithelial antigen of prostate 2                                              | 0006810 // transport // inferred from electronic annotation///0006811 // ion transport // inferred from mutant phenotype///0008202 // steroid metabolic process // not recorded///0008202 // steroid metabolic process |
| NM_001081029///XR_016681///XM_006                                | 0.016 | 1.498  | <b>Cyp2b10</b>                                   | cytochrome P450, family 2, subfamily b, polypeptide 10                                          | 0006805 // xenobiotic metabolic process // not recorded///0008202 // steroid metabolic process                                                                                                                         |
| NM_001081029///XR_016681///XM_006                                | 0.000 | 1.501  | <b>Tmem243///Gm31539</b>                         | transmembrane protein 243, mitochondrial///predicted gene, 31                                   | 0016020 // membrane // inferred from electronic annotation///0016021 // integral component of membrane                                                                                                                 |
| NM_016681///XM_006                                               | 0.029 | 1.503  | <b>Chek2</b>                                     | checkpoint kinase 2                                                                             | 0000077 // DNA damage checkpoint // not recorded///0000086 // G2/M transition of mitotic cell cycle                                                                                                                    |
| NM_001291892///NM_001291892///NM_007440///XM_011                 | 0.037 | 1.503  | <b>Lilr4b///Lilrb4a</b>                          | leukocyte immunoglobulin-like receptor, subfamily B, member 4E                                  | 0002250 // adaptive immune response // inferred from electronic annotation///0002376 // interleukin-12 production                                                                                                      |
| NM_001291892///NM_007440///XM_011                                | 0.037 | 1.503  | <b>Lilr4b///Lilrb4a</b>                          | leukocyte immunoglobulin-like receptor, subfamily B, member 4E                                  | 0002250 // adaptive immune response // inferred from electronic annotation///0002376 // interleukin-12 production                                                                                                      |
| NM_029309                                                        | 0.002 | 1.504  | <b>Alox12</b>                                    | arachidonate 12-lipoxygenase                                                                    | 0006629 // lipid metabolic process // inferred from electronic annotation///0006631 // fatty acid oxidation                                                                                                            |
| NM_001168469///NM_010745                                         | 0.047 | 1.505  | <b>Morn5</b>                                     | MORN repeat containing 5                                                                        |                                                                                                                                                                                                                        |
| NM_001168469///NM_010745                                         | 0.013 | 1.506  | <b>Ube2m</b>                                     | ubiquitin-conjugating enzyme E2M                                                                | 0006464 // cellular protein modification process // not recorded///0016567 // protein ubiquitination                                                                                                                   |
| NM_172796///XM_006                                               | 0.032 | 1.509  | <b>Ly86</b>                                      | lymphocyte antigen 86                                                                           | 0002376 // immune system process // inferred from electronic annotation///0006954 // inflammation                                                                                                                      |
| NM_001081957///XM_010185                                         | 0.001 | 1.510  | <b>Slf9</b>                                      | schlafen 9                                                                                      | 0051607 // defense response to virus // inferred from electronic annotation///2000134 // negative regulation of transcription from RNA polymerase II promoter                                                          |
| NM_001081957///XM_010185                                         | 0.049 | 1.510  | <b>Wfdc17</b>                                    | WAP four-disulfide core domain protein 18-like///WAP four-disulfide core domain protein 18-like | 0010466 // negative regulation of peptidase activity // inferred from electronic annotation///                                                                                                                         |
| NM_001160386///XM_008148                                         | 0.009 | 1.514  | <b>Fcer1g</b>                                    | Fc receptor, IgE, high affinity I, gamma polypeptide                                            | 0001798 // positive regulation of type I hypersensitivity // inferred from mutant phenotype,                                                                                                                           |
| NM_001160386///XM_008148                                         | 0.026 | 1.516  | <b>Dnah7b</b>                                    | dynein, axonemal, heavy chain 7B                                                                | 0003341 // cilium movement // inferred from electronic annotation///0007018 // microtubule cytoskeleton organization                                                                                                   |
| NM_001033444///XM_0005175                                        | 0.001 | 1.520  | <b>Gp5</b>                                       | glycoprotein 5 (platelet)                                                                       | 0007160 // cell-matrix adhesion // inferred from mutant phenotype///0007409 // axonogenesis                                                                                                                            |
| NM_001033444///XM_0005175                                        | 0.005 | 1.530  | <b>Capn13</b>                                    | calpain 13                                                                                      | 0006508 // proteolysis // not recorded                                                                                                                                                                                 |

| RefSeq Transcript ID | p     | FD Air | Gene Symbol                          | Gene Title                                                           | Gene Ontology                                                                                   |
|----------------------|-------|--------|--------------------------------------|----------------------------------------------------------------------|-------------------------------------------------------------------------------------------------|
| NM_013478            | 0.012 | 1.533  | <b>Azgp1</b>                         | alpha-2-glycoprotein 1, zinc                                         | 0001580 // detection of chemical stimulus involved in sensory perception of bitter taste // no  |
| NM_133365//XM_006    | 0.005 | 1.535  | <b>Dnah5</b>                         | dynein, axonemal, heavy chain 5                                      | 0003341 // cilium movement // inferred from mutant phenotype//0003341 // cilium moverr          |
| NM_022430            | 0.027 | 1.536  | <b>Ms4a8a</b>                        | membrane-spanning 4-domains, subfamily A, member 8A                  | 0016020 // membrane // inferred from electronic annotation//0016021 // integral compone         |
| NM_023124//NM_20:    | 0.017 | 1.540  | <b>H2-Q6//H2-Q8//H2-Q4</b>           | histocompatibility 2, Q region locus 6//histocompatibility 2, Q re   | 0002474 // antigen processing and presentation of peptide antigen via MHC class I // not recc   |
| NM_001001892//NM:    | 0.013 | 1.543  | <b>H2-D1//H2-K1//H2-L//H2-Q2//H2</b> | histocompatibility 2, D region locus 1//histocompatibility 2, K1, I  | 0001916 // positive regulation of T cell mediated cytotoxicity // inferred from direct assay//C |
| NM_001177900//NM:    | 0.029 | 1.543  | <b>Rd3</b>                           | retinal degeneration 3                                               | 0007601 // visual perception // inferred from electronic annotation//0050896 // response to     |
| NM_001170851//NM:    | 0.034 | 1.544  | <b>Klra2</b>                         | killer cell lectin-like receptor, subfamily A, member 2              | 0007155 // cell adhesion // inferred from electronic annotation                                 |
| NM_019440            | 0.001 | 1.545  | <b>Irgm2</b>                         | immunity-related GTPase family M member 2                            | 0034341 // response to interferon-gamma // inferred from direct assay//0034341 // respons       |
| NM_001081369//XM:    | 0.029 | 1.549  | <b>Ccdc153</b>                       | coiled-coil domain containing 153                                    | 0005515 // protein binding // inferred from electronic annotation                               |
| NM_001039160//NM:    | 0.001 | 1.552  | <b>Gm4070//Gvin1</b>                 | predicted gene 4070//GTPase, very large interferon inducible 1       | 0000166 // nucleotide binding // inferred from electronic annotation//0005525 // GTP bindi      |
| NM_053085//XM_006    | 0.009 | 1.552  | <b>Tcf23</b>                         | transcription factor 23                                              | 0007275 // multicellular organismal development // inferred from electronic annotation//00      |
| NM_030150            | 0.007 | 1.553  | <b>Dhx58</b>                         | DEXH (Asp-Glu-X-His) box polypeptide 58                              | 0002376 // immune system process // inferred from electronic annotation//0008152 // met:        |
| NM_001172207//NM:    | 0.047 | 1.555  | <b>Lrtm2</b>                         | leucine-rich repeats and transmembrane domains 2                     | 0007409 // axonogenesis // not recorded//0051965 // positive regulation of synapse assem        |
| NM_001080707//NM:    | 0.001 | 1.556  | <b>Gpr155</b>                        | G protein-coupled receptor 155                                       | 0035556 // intracellular signal transduction // inferred from electronic annotation//0050890    |
| NM_130452//XM_006    | 0.006 | 1.557  | <b>Bbox1</b>                         | butyrobetaine (gamma), 2-oxoglutarate dioxygenase 1 (gamma-b         | 0045329 // carnitine biosynthetic process // not recorded//0055114 // oxidation-reduction p     |
| NM_009252//XM_011    | 0.031 | 1.558  | <b>Serpina3n</b>                     | serine (or cysteine) peptidase inhibitor, clade A, member 3N         | 0006953 // acute-phase response // inferred from electronic annotation//0010466 // negati       |
| NM_008240//XM_006    | 0.002 | 1.561  | <b>Foxj1</b>                         | forkhead box J1                                                      | 0001122 // negative regulation of transcription from RNA polymerase II promoter // inferred     |
| NM_177546//NM_21:    | 0.001 | 1.562  | <b>Pcyt1b</b>                        | phosphate cytidylyltransferase 1, choline, beta isoform              | 0001541 // ovarian follicle development // inferred from mutant phenotype//0006629 // lipi      |
| NM_021332            | 0.022 | 1.563  | <b>Glp1r</b>                         | glucagon-like peptide 1 receptor                                     | 0016020 // membrane // inferred from electronic annotation//0016021 // integral compone         |
| NM_027209//XM_011    | 0.003 | 1.564  | <b>Ms4a6b</b>                        | membrane-spanning 4-domains, subfamily A, member 6B                  |                                                                                                 |
| NM_008039            | 0.000 | 1.567  | <b>Fpr2</b>                          | formyl peptide receptor 2                                            | 0006935 // chemotaxis // inferred from electronic annotation//0007165 // signal transductic     |
| NM_029762            | 0.015 | 1.567  | <b>Hyls1</b>                         | hydrolethalus syndrome 1                                             |                                                                                                 |
| NM_009201//XM_006    | 0.022 | 1.572  | <b>Slc1a5</b>                        | solute carrier family 1 (neutral amino acid transporter), member 1   | 0003333 // amino acid transmembrane transport // not recorded//0006810 // transport // i        |
| NM_133990            | 0.003 | 1.572  | <b>Il13ra1</b>                       | interleukin 13 receptor, alpha 1                                     | 0019221 // cytokine-mediated signaling pathway // inferred from electronic annotation//00:      |
| NM_198095            | 0.001 | 1.572  | <b>Bst2</b>                          | bone marrow stromal cell antigen 2                                   | 0002376 // immune system process // inferred from electronic annotation//0002737 // neg:        |
| NM_001302338//NM:    | 0.005 | 1.573  | <b>Nfe2</b>                          | nuclear factor, erythroid derived 2                                  | 0006351 // transcription, DNA-templated // inferred from electronic annotation//0006355 //      |
| NM_175467//XM_006    | 0.032 | 1.573  | <b>Spltc3</b>                        | serine palmitoyltransferase, long chain base subunit 3               | 0006629 // lipid metabolic process // inferred from electronic annotation//0006665 // sphin,    |
| NM_001159417//NM:    | 0.001 | 1.584  | <b>Irf9</b>                          | interferon regulatory factor 9                                       | 0006351 // transcription, DNA-templated // inferred from electronic annotation//0006355 //      |
| NM_001204241//NM:    | 0.030 | 1.585  | <b>Clec4a3</b>                       | C-type lectin domain family 4, member a3                             | 0006508 // proteolysis // inferred from electronic annotation                                   |
| NM_001112725//NM:    | 0.017 | 1.588  | <b>Aldh3a1</b>                       | aldehyde dehydrogenase family 3, subfamily A1                        | 0001666 // response to hypoxia // not recorded//0006081 // cellular aldehyde metabolic prc      |
| NM_001166376//NM:    | 0.009 | 1.590  | <b>Ms4a6c//Gm8369</b>                | membrane-spanning 4-domains, subfamily A, member 6C//pred            | 0016020 // membrane // inferred from electronic annotation//0016021 // integral compone         |
| NM_145825            | 0.014 | 1.594  | <b>Cetn4</b>                         | centrin 4                                                            | 0005509 // calcium ion binding // inferred from direct assay//0031683 // G-protein beta/gar     |
| NM_029495//NM_17:    | 0.000 | 1.602  | <b>Epsti1</b>                        | epithelial stromal interaction 1 (breast)                            |                                                                                                 |
| NM_009841            | 0.013 | 1.605  | <b>Cd14</b>                          | CD14 antigen                                                         | 0002237 // response to molecule of bacterial origin // inferred from direct assay//0002376 //   |
| NM_028377//XM_006    | 0.011 | 1.609  | <b>Bbof1</b>                         | basal body orientation factor 1                                      | 0044458 // motile cilium assembly // inferred from sequence or structural similarity            |
| NM_001110323//NM:    | 0.004 | 1.611  | <b>Klra7//LOC100862438</b>           | killer cell lectin-like receptor, subfamily A, member 7//killer cell | 0007155 // cell adhesion // inferred from electronic annotation                                 |
| NM_007807//XM_006    | 0.019 | 1.613  | <b>Cybb</b>                          | cytochrome b-245, beta polypeptide                                   | 0006801 // superoxide metabolic process // inferred from mutant phenotype//0006801 // si        |
| NM_008326//XM_006    | 0.000 | 1.619  | <b>Irgm1</b>                         | immunity-related GTPase family M member 1                            | 0002376 // immune system process // inferred from electronic annotation//0006914 // auto        |
| NM_029112//XM_006    | 0.019 | 1.620  | <b>Morn3</b>                         | MORN repeat containing 3                                             |                                                                                                 |
| NM_001042451//NM:    | 0.019 | 1.620  | <b>Snca</b>                          | synuclein, alpha                                                     | 0001774 // microglial cell activation // inferred from mutant phenotype//0001921 // positiv     |
| NM_029007            | 0.005 | 1.632  | <b>Fam84a</b>                        | family with sequence similarity 84, member A                         |                                                                                                 |
| NM_194336//XM_006    | 0.000 | 1.634  | <b>Gbp6</b>                          | guanylate binding protein 6                                          | 0006955 // immune response // inferred from mutant phenotype//0008152 // metabolic prc          |
| NM_029383            | 0.029 | 1.637  | <b>Cldn22</b>                        | claudin 22                                                           | 0016338 // calcium-independent cell-cell adhesion via plasma membrane cell-adhesion molec       |
| NM_177753            | 0.009 | 1.640  | <b>Sox21</b>                         | SRY (sex determining region Y)-box 21                                | 0001942 // hair follicle development // inferred from mutant phenotype//0006351 // transc       |
| NM_144559            | 0.001 | 1.641  | <b>Fcgr4</b>                         | Fc receptor, IgG, low affinity IV                                    | 0001866 // NK T cell proliferation // not recorded//0051930 // regulation of sensory percept    |
| NM_019807//NM_20:    | 0.049 | 1.646  | <b>Acpp</b>                          | acid phosphatase, prostate                                           | 0006144 // purine nucleobase metabolic process // inferred from mutant phenotype//00064         |
| NM_001316689//NM:    | 0.030 | 1.647  | <b>Ern2</b>                          | endoplasmic reticulum (ER) to nucleus signalling 2                   | 0006351 // transcription, DNA-templated // inferred from electronic annotation//0006355 //      |
| NM_001145948//NM:    | 0.007 | 1.649  | <b>Ttc39a</b>                        | tetratricopeptide repeat domain 39A                                  |                                                                                                 |
| NM_021407//XM_006    | 0.007 | 1.653  | <b>Trem3</b>                         | triggering receptor expressed on myeloid cells 3                     | 0002374 // cytokine secretion involved in immune response // inferred from genetic interacti    |
| NM_016925//XM_006    | 0.014 | 1.653  | <b>Fanca</b>                         | Fanconi anemia, complementation group A                              | 0006281 // DNA repair // inferred from electronic annotation//0006974 // cellular response      |
| NM_009915//XM_006    | 0.003 | 1.654  | <b>Ccr2</b>                          | chemokine (C-C motif) receptor 2                                     | 0001525 // angiogenesis // traceable author statement//0001974 // blood vessel remodeling       |
| NM_178386            | 0.014 | 1.657  | <b>Slc25a31</b>                      | solute carrier family 25 (mitochondrial carrier; adenine nucleotid   | 0006810 // transport // inferred from electronic annotation//0055085 // transmembrane tr        |
| NM_007417            | 0.015 | 1.658  | <b>Adra2a</b>                        | adrenergic receptor, alpha 2a                                        | 0001819 // positive regulation of cytokine production // not recorded//0002526 // acute inf     |
| NM_001122635//NM:    | 0.006 | 1.662  | <b>Cdhr4</b>                         | cadherin-related family member 4                                     | 0007155 // cell adhesion // inferred from electronic annotation//0007156 // homophilic cell     |

| RefSeq Transcript ID | p     | FD Air | Gene Symbol                             | Gene Title                                                                         | Gene Ontology                                                                                   |
|----------------------|-------|--------|-----------------------------------------|------------------------------------------------------------------------------------|-------------------------------------------------------------------------------------------------|
| NM_028275//XM_006    | 0.025 | 1.665  | <b>1700112E06Rik</b>                    | RIKEN cDNA 1700112E06 gene                                                         | 0030154 // cell differentiation // inferred from electronic annotation//0030318 // melanocyt    |
| NM_029662//XM_006    | 0.016 | 1.671  | <b>Mfsd2a</b>                           | major facilitator superfamily domain containing 2A                                 | 0006810 // transport // inferred from electronic annotation//0006869 // lipid transport // in   |
| NM_001174053//NM_    | 0.044 | 1.679  | <b>Camk2b</b>                           | calcium/calmodulin-dependent protein kinase II, beta                               | 0000082 // G1/S transition of mitotic cell cycle // inferred from mutant phenotype//000203C     |
| NM_011408            | 0.000 | 1.681  | <b>Slfn2</b>                            | schlafen 2                                                                         | 0008285 // negative regulation of cell proliferation // inferred from direct assay              |
| NM_0111023           | 0.036 | 1.686  | <b>Otx1</b>                             | orthodenticle homolog 1                                                            | 0006355 // regulation of transcription, DNA-templated // inferred from electronic annotation.   |
| NM_181589//XM_006    | 0.001 | 1.689  | <b>Ckap2l</b>                           | cytoskeleton associated protein 2-like                                             | 0000922 // spindle pole // inferred from electronic annotation//0005737 // cytoplasm // infe    |
| NM_007689            | 0.001 | 1.697  | <b>Chad</b>                             | chondroadherin                                                                     | 0001502 // cartilage condensation // inferred from electronic annotation//00060348 // bone      |
| NM_019948//XM_011    | 0.044 | 1.699  | <b>Clec4e</b>                           | C-type lectin domain family 4, member e                                            | 0002292 // T cell differentiation involved in immune response // inferred from mutant pheno     |
| NM_145226            | 0.033 | 1.700  | <b>Oas3</b>                             | 2'-5' oligoadenylate synthetase 3                                                  | 0002376 // immune system process // inferred from electronic annotation//0006164 // puri        |
| NM_001166627//NM_    | 0.000 | 1.702  | <b>Dynlt1a//Dynlt1b//Dynlt1c//Dynlt</b> | dynein light chain Tctex-type 1A//dynein light chain Tctex-type 1                  | 0000132 // establishment of mitotic spindle orientation // inferred from mutant phenotype//     |
| NM_001101605//NM_    | 0.002 | 1.703  | <b>Iift1bl1</b>                         | interferon induced protein with tetratricopeptide repeats 1B like 1                | 0051607 // defense response to virus // not recorded//00060337 // type I interferon signaling   |
| NM_001167743//NM_    | 0.048 | 1.704  | <b>Slfn8</b>                            | schlafen 8                                                                         | 0051607 // defense response to virus // inferred from electronic annotation//0000134 // neq     |
| NM_024444//XM_006    | 0.006 | 1.710  | <b>Cyp4f18</b>                          | cytochrome P450, family 4, subfamily f, polypeptide 18                             | 0000038 // very long-chain fatty acid metabolic process // not recorded//0001676 // long-ch     |
| NM_153094//NR_024    | 0.003 | 1.715  | <b>Klrb1f</b>                           | killer cell lectin-like receptor subfamily B member 1F                             | 0004872 // receptor activity // inferred from direct assay//0005515 // protein binding // infe  |
| NM_010654//XM_006    | 0.019 | 1.727  | <b>Klrd1</b>                            | killer cell lectin-like receptor, subfamily D, member 1                            | 0002228 // natural killer cell mediated immunity // not recorded                                |
| NM_001301353//NM_    | 0.018 | 1.731  | <b>Apod</b>                             | apolipoprotein D                                                                   | 0000302 // response to reactive oxygen species // inferred from mutant phenotype//00003C        |
| NM_023785            | 0.009 | 1.732  | <b>Ppbp</b>                             | pro-platelet basic protein                                                         | 0002523 // leukocyte migration involved in inflammatory response // inferred from mutant p      |
| XM_006521609//XM_    | 0.036 | 1.734  | <b>Fer1l6</b>                           | fer-1-like 6 (C. elegans)                                                          |                                                                                                 |
| NM_001033170//XM_    | 0.023 | 1.735  | <b>Fam83e</b>                           | family with sequence similarity 83, member E                                       | 0019901 // protein kinase binding // not recorded                                               |
| NM_001162878//NM_    | 0.015 | 1.742  | <b>Fam183b</b>                          | family with sequence similarity 183, member B                                      |                                                                                                 |
| NM_009610            | 0.032 | 1.746  | <b>Actg2</b>                            | actin, gamma 2, smooth muscle, enteric                                             | 0010628 // positive regulation of gene expression // inferred from sequence or structural sim   |
| NM_010186            | 0.000 | 1.754  | <b>Fcgr1</b>                            | Fc receptor, IgG, high affinity I                                                  | 0001788 // antibody-dependent cellular cytotoxicity // inferred from mutant phenotype//00       |
| NM_011073//XM_006    | 0.000 | 1.756  | <b>Prf1</b>                             | perforin 1 (pore forming protein)                                                  | 0001771 // immunological synapse formation // not recorded//0002357 // defense response         |
| NM_016974//XM_006    | 0.033 | 1.765  | <b>Dbp</b>                              | D site albumin promoter binding protein                                            | 0001889 // liver development // inferred from electronic annotation//0006351 // transcripti     |
| NM_001033450//NM_    | 0.026 | 1.770  | <b>Ifi204//Ifi205//Mnda//Mndal</b>      | interferon activated gene 204//interferon activated gene 205//                     | 0000122 // negative regulation of transcription from RNA polymerase II promoter // ---//000     |
| NM_001166627//NM_    | 0.000 | 1.785  | <b>Dynlt1-ps1//Dynlt1a//Dynlt1b//Dy</b> | dynein light chain Tctex-type 1, pseudogene 1//dynein light ch                     | 0000132 // establishment of mitotic spindle orientation // inferred from mutant phenotype//     |
| NM_080457//NM_18:    | 0.004 | 1.789  | <b>Muc4</b>                             | mucin 4                                                                            | 0001953 // negative regulation of cell-matrix adhesion // not recorded//0002244 // hemato       |
| NM_001281852//NM_    | 0.000 | 1.799  | <b>S100a9</b>                           | S100 calcium binding protein A9 (calgranulin B)                                    | 0002376 // immune system process // inferred from electronic annotation//0002523 // leuk        |
| NM_019507            | 0.001 | 1.807  | <b>Tbx21</b>                            | T-box 21                                                                           | 0006351 // transcription, DNA-templated // inferred from electronic annotation//0006355 /,      |
| NM_011397//XM_011    | 0.001 | 1.819  | <b>Slc23a1</b>                          | solute carrier family 23 (nucleobase transporters), member 1                       | 0006810 // transport // inferred from electronic annotation//0006811 // ion transport // inf    |
| NM_001146275//NM_    | 0.000 | 1.834  | <b>Iigp1</b>                            | interferon inducible GTPase 1                                                      | 0002376 // immune system process // inferred from electronic annotation//0008152 // met:        |
| NM_018738            | 0.000 | 1.837  | <b>Igtp</b>                             | interferon gamma induced GTPase                                                    | 0035458 // cellular response to interferon-beta // inferred from direct assay                   |
| NM_021475            | 0.002 | 1.838  | <b>Adamdec1</b>                         | ADAM-like, decysin 1                                                               | 0006508 // proteolysis // inferred from electronic annotation                                   |
| NM_007769//XM_006    | 0.002 | 1.841  | <b>Dmbt1</b>                            | deleted in malignant brain tumors 1                                                | 0001824 // blastocyst development // inferred from mutant phenotype//0001833 // inner c         |
| NM_001302559//NM_    | 0.002 | 1.848  | <b>Slfn3//Slfn4</b>                     | schlafen 3//schlafen 4                                                             | 0008285 // negative regulation of cell proliferation // inferred from direct assay              |
| NM_145209//XM_006    | 0.000 | 1.851  | <b>Oas1</b>                             | 2'-5' oligoadenylate synthetase-like 1                                             | 0002376 // immune system process // inferred from electronic annotation//0006955 // imm         |
| NM_001081746//XM_    | 0.001 | 1.853  | <b>Csprs</b>                            | component of Sp100-rs//predicted pseudogene 15433//predict                         | 0006338 // chromatin remodeling // ---//0006355 // regulation of transcription, DNA-templa      |
| NM_001291066//NM_    | 0.049 | 1.858  | <b>Adam8</b>                            | a disintegrin and metallopeptidase domain 8                                        | 0000902 // cell morphogenesis // inferred from mutant phenotype//0001525 // angiogenesi         |
| NM_001289492//NM_    | 0.000 | 1.866  | <b>Gbp3</b>                             | guanylate binding protein 3                                                        | 0008152 // metabolic process // inferred from electronic annotation//0035458 // cellular res    |
| NM_009978//XM_006    | 0.001 | 1.876  | <b>Cst8</b>                             | cystatin 8 (cystatin-related epididymal spermatogenic)                             | 0010466 // negative regulation of peptidase activity // inferred from electronic annotation//   |
| NM_001139519//NM_    | 0.000 | 1.876  | <b>Zbp1</b>                             | Z-DNA binding protein 1                                                            | 0002376 // immune system process // inferred from electronic annotation//0008152 // met:        |
| NM_008329//XM_006    | 0.009 | 1.885  | <b>Ifi204//Ifi205//Mnda//Mndal</b>      | interferon activated gene 204//interferon activated gene 205//                     | 0006351 // transcription, DNA-templated // inferred from electronic annotation//0006355 /,      |
| NM_153590//XM_006    | 0.000 | 1.887  | <b>Klre1</b>                            | killer cell lectin-like receptor family E member 1                                 | 0002223 // stimulatory C-type lectin receptor signaling pathway // inferred from direct assay/  |
| NM_001110323//NM_    | 0.049 | 1.896  | <b>Klra7//LOC100862438</b>              | killer cell lectin-like receptor, subfamily A, member 7//killer cell l             | 0007155 // cell adhesion // inferred from electronic annotation                                 |
| NM_0008489           | 0.001 | 1.899  | <b>Lbp</b>                              | lipopolysaccharide binding protein                                                 | 0001889 // liver development // inferred from electronic annotation//0002232 // leukocyte       |
| NM_001142706//NM_    | 0.000 | 1.899  | <b>Cfb</b>                              | complement factor B                                                                | 0002376 // immune system process // inferred from electronic annotation//0006508 // prot        |
| NM_008611            | 0.001 | 1.906  | <b>Mmp8</b>                             | matrix metallopeptidase 8                                                          | 0006508 // proteolysis // not recorded//0030574 // collagen catabolic process // inferred fr    |
| NM_139198//XM_011    | 0.000 | 1.932  | <b>Plac8</b>                            | placenta-specific 8                                                                | 0008284 // positive regulation of cell proliferation // inferred from direct assay//0009409 //  |
| NM_178594            | 0.013 | 1.934  | <b>Vtcn1</b>                            | V-set domain containing T cell activation inhibitor 1                              | 0001562 // response to protozoan // inferred from mutant phenotype//0002250 // adaptive         |
| NM_013650            | 0.000 | 1.942  | <b>S100a8</b>                           | S100 calcium binding protein A8 (calgranulin A)                                    | 0002376 // immune system process // inferred from electronic annotation//0002523 // leuk        |
| NM_001136068//NM_    | 0.026 | 1.945  | <b>Klrc1</b>                            | killer cell lectin-like receptor subfamily C, member 1                             | 0023024 // MHC class I protein complex binding // not recorded                                  |
| NM_001270495//NM_    | 0.009 | 1.952  | <b>Tmem254a//Tmem254b//Tmem254</b>      | transmembrane protein 254a//transmembrane protein 254b//transmembrane protein 254c |                                                                                                 |
| NM_001198560//NM_    | 0.006 | 1.955  | <b>H2-D4//H2-Q7//H2-Q9</b>              | histocompatibility 2, D region locus 4//histocompatibility 2, Q re                 | 0001916 // positive regulation of T cell mediated cytotoxicity // inferred from direct assay//C |
| NM_011909            | 0.000 | 1.958  | <b>Usp18</b>                            | ubiquitin specific peptidase 18                                                    | 0006508 // proteolysis // inferred from electronic annotation//0006511 // ubiquitin-depend      |

| RefSeq Transcript ID                          | p                       | FD Air                  | Gene Symbol                                                                                                            | Gene Title                                                                                                                                             | Gene Ontology                                                                                                                                                                                                                                                                                |
|-----------------------------------------------|-------------------------|-------------------------|------------------------------------------------------------------------------------------------------------------------|--------------------------------------------------------------------------------------------------------------------------------------------------------|----------------------------------------------------------------------------------------------------------------------------------------------------------------------------------------------------------------------------------------------------------------------------------------------|
| NM_001037713//NM_001270495//NM_026630         | 0.000<br>0.009<br>0.014 | 1.967<br>1.985<br>1.990 | <b>Xaf1</b><br><b>Tmem254a</b> /// <b>Tmem254b</b> /// <b>Tmem254</b><br><b>Gtsf1</b>                                  | XIAP associated factor 1<br>transmembrane protein 254a//transmembrane protein 254b//transmembrane protein 254c<br>gametocyte specific factor 1-like    | 0006915 // apoptotic process // inferred from electronic annotation//0031333 // negative re<br>0046872 // metal ion binding // inferred from electronic annotation                                                                                                                           |
| NM_001281845//NM_010501//XM_011               | 0.040<br>0.000          | 1.994<br>2.012          | <b>Anxa8</b><br><b>Ifi3</b>                                                                                            | annexin A8<br>interferon-induced protein with tetratricopeptide repeats 3                                                                              | 0007596 // blood coagulation // inferred from electronic annotation//0007599 // hemostasi:<br>0002376 // immune system process // inferred from electronic annotation//0008285 // neg:                                                                                                       |
| NM_021274                                     | 0.016                   | 2.018                   | <b>Cxcl10</b>                                                                                                          | chemokine (C-X-C motif) ligand 10                                                                                                                      | 0002690 // positive regulation of leukocyte chemotaxis // not recorded//0006935 // chemot                                                                                                                                                                                                    |
| NM_009363                                     | 0.015                   | 2.022                   | <b>Tff2</b>                                                                                                            | trefoil factor 2 (spasmolytic protein 1)                                                                                                               | 0008284 // positive regulation of cell proliferation // inferred from genetic interaction//0008                                                                                                                                                                                              |
| NM_013653                                     | 0.001                   | 2.029                   | <b>Ccl5</b>                                                                                                            | chemokine (C-C motif) ligand 5                                                                                                                         | 0000165 // MAPK cascade // not recorded//0002230 // positive regulation of defense respor                                                                                                                                                                                                    |
| NM_011150                                     | 0.000                   | 2.055                   | <b>Lgals3bp</b>                                                                                                        | lectin, galactoside-binding, soluble, 3 binding protein                                                                                                | 0006898 // receptor-mediated endocytosis // inferred from sequence or structural similarity/                                                                                                                                                                                                 |
| NM_001081746//NM_001033632                    | 0.002<br>0.012          | 2.059<br>2.059          | <b>Csprs</b><br><b>lftm6</b>                                                                                           | component of Sp100-rs//predicted pseudogene 15433//predict<br>interferon induced transmembrane protein 6                                               | 0006338 // chromatin remodeling // ---//0006355 // regulation of transcription, DNA-templa<br>0009607 // response to biotic stimulus // inferred from electronic annotation                                                                                                                  |
| NM_016675//XM_006                             | 0.001                   | 2.069                   | <b>Cldn2</b>                                                                                                           | claudin 2                                                                                                                                              | 0016338 // calcium-independent cell-cell adhesion via plasma membrane cell-adhesion molec                                                                                                                                                                                                    |
| NM_001145164//NM_010172                       | 0.000<br>0.005          | 2.094<br>2.098          | <b>Tgtp1</b> /// <b>Tgtp2</b><br><b>F7</b>                                                                             | T cell specific GTPase 1//T cell specific GTPase 2<br>coagulation factor VII                                                                           | 0006955 // immune response // non-traceable author statement//0009615 // response to vi<br>0002690 // positive regulation of leukocyte chemotaxis // not recorded//0006508 // proteol                                                                                                        |
| NM_020002//XM_006                             | 0.048                   | 2.103                   | <b>Rec8</b>                                                                                                            | REC8 meiotic recombination protein                                                                                                                     | 0000724 // double-strand break repair via homologous recombination // inferred from geneti                                                                                                                                                                                                   |
| NM_001161621//NM_001204910//XM_134157         | 0.043<br>0.047<br>0.022 | 2.105<br>2.111<br>2.150 | <b>Aoc1</b><br><b>Al607873</b><br><b>Atp6v1b1</b>                                                                      | amine oxidase, copper-containing 1<br>expressed sequence Al607873<br>ATPase, H+ transporting, lysosomal V1 subunit B1                                  | 0006812 // cation transport // ---//0009308 // amine metabolic process // inferred from elec<br>0000122 // negative regulation of transcription from RNA polymerase II promoter // ---<br>0001503 // ossification // not recorded//0001503 // ossification // inferred from sequence o       |
| NM_029796                                     | 0.002                   | 2.192                   | <b>Lrg1</b>                                                                                                            | leucine-rich alpha-2-glycoprotein 1                                                                                                                    | 0001938 // positive regulation of endothelial cell proliferation // inferred from mutant pheno                                                                                                                                                                                               |
| NM_001277944//NM_001101620//NM_023386//XM_006 | 0.003<br>0.011<br>0.000 | 2.205<br>2.209<br>2.221 | <b>Apoc2</b> /// <b>Apoc4-apoc2</b><br><b>Klra21</b> /// <b>Klra3</b> /// <b>Klra8</b> /// <b>Klra9</b><br><b>Rtp4</b> | apolipoprotein C-II//Apoc4-Apoc2 readthrough<br>killer cell lectin-like receptor subfamily A, member 21//killer cell<br>receptor transporter protein 4 | 0006629 // lipid metabolic process // inferred from electronic annotation//0006810 // trans<br>0007155 // cell adhesion // inferred from electronic annotation//0009615 // response to vir<br>0001580 // detection of chemical stimulus involved in sensory perception of bitter taste // no |
| NM_001304551//NM_130878                       | 0.029<br>0.000          | 2.234<br>2.236          | <b>Stil</b><br><b>Cdhr1</b>                                                                                            | Scf/Tal1 interrupting locus<br>cadherin-related family member 1                                                                                        | 0000578 // embryonic axis specification // inferred from mutant phenotype//0001701 // in t<br>0007155 // cell adhesion // inferred from electronic annotation//0007156 // homophilic cell                                                                                                    |
| NM_001033207//XM_145600                       | 0.000<br>0.047          | 2.253<br>2.267          | <b>Nlr5</b><br><b>Zfp330</b>                                                                                           | NLR family, CARD domain containing 5<br>zinc finger protein 330                                                                                        | 0002376 // immune system process // inferred from electronic annotation//0032088 // neg:<br>0008270 // zinc ion binding // inferred from electronic annotation//0046872 // metal ion bin                                                                                                     |
| NM_001033384//NM_001289604//NM_010846//NR_003 | 0.003<br>0.004<br>0.000 | 2.271<br>2.279<br>2.300 | <b>Pydc4</b><br><b>Klra3</b> /// <b>Klra9</b><br><b>Mx1</b>                                                            | pyrin domain containing 4<br>killer cell lectin-like receptor, subfamily A, member 3//killer cell<br>MX dynamin-like GTPase 1                          | 0000122 // negative regulation of transcription from RNA polymerase II promoter // ---<br>0007155 // cell adhesion // inferred from electronic annotation<br>0002376 // immune system process // inferred from electronic annotation//0008152 // met:                                        |
| NM_029499//XM_006                             | 0.001                   | 2.305                   | <b>Ms4a4c</b>                                                                                                          | membrane-spanning 4-domains, subfamily A, member 4C                                                                                                    | 0005887 // integral component of plasma membrane // inferred from electronic annotation//                                                                                                                                                                                                    |
| NM_001033409//XM_010362                       | 0.018<br>0.001          | 2.307<br>2.316          | <b>Lgr6</b><br><b>Gsto1</b>                                                                                            | leucine-rich repeat-containing G protein-coupled receptor 6<br>glutathione S-transferase omega 1                                                       | 0007165 // signal transduction // inferred from electronic annotation//0007186 // G-protein<br>0006749 // glutathione metabolic process // not recorded//0008152 // metabolic process //                                                                                                     |
| NM_008331                                     | 0.000                   | 2.325                   | <b>Ifi1</b>                                                                                                            | interferon-induced protein with tetratricopeptide repeats 1                                                                                            | 0002376 // immune system process // inferred from electronic annotation//0009615 // resp                                                                                                                                                                                                     |
| NM_146050//XM_006                             | 0.040                   | 2.337                   | <b>Oit1</b>                                                                                                            | oncoprotein induced transcript 1                                                                                                                       | 0046676 // negative regulation of insulin secretion // not recorded//0046676 // negative reg                                                                                                                                                                                                 |
| NM_001136059//NM_145838//XM_006               | 0.009<br>0.002          | 2.357<br>2.396          | <b>Cyp1a1</b><br><b>St8sia6</b>                                                                                        | cytochrome P450, family 1, subfamily a, polypeptide 1<br>ST8 alpha-N-acetyl-neuraminidase alpha-2,8-sialyltransferase 6                                | 0001666 // response to hypoxia // inferred from electronic annotation//0001889 // liver dev<br>0001574 // ganglioside biosynthetic process // inferred from direct assay//0006486 // protei                                                                                                  |
| NM_026671//XM_006                             | 0.010                   | 2.427                   | <b>Lypd2</b>                                                                                                           | Ly6/Plaur domain containing 2                                                                                                                          | 0005576 // extracellular region // ---//0005886 // plasma membrane // inferred from electro                                                                                                                                                                                                  |
| NM_175026                                     | 0.004                   | 2.427                   | <b>Pyhin1</b>                                                                                                          | pyrin and HIN domain family, member 1                                                                                                                  | 0000122 // negative regulation of transcription from RNA polymerase II promoter // ---//003                                                                                                                                                                                                  |
| NM_153576                                     | 0.001                   | 2.430                   | <b>Cxcl17</b>                                                                                                          | chemokine (C-X-C motif) ligand 17                                                                                                                      | 0001525 // angiogenesis // inferred from electronic annotation//0006935 // chemotaxis // ir                                                                                                                                                                                                  |
| NM_013542                                     | 0.000                   | 2.441                   | <b>Gzmb</b>                                                                                                            | granzyme B                                                                                                                                             | 0001913 // T cell mediated cytotoxicity // inferred from mutant phenotype//0006508 // pro                                                                                                                                                                                                    |
| XM_011238903//XM_015783//XR_168               | 0.041<br>0.000          | 2.560<br>2.611          | <b>Gm37416</b> /// <b>Gm39743</b> /// <b>Gm40611</b> ///<br><b>Gm9706</b> /// <b>Isg15</b>                             | predicted gene, 37416//predicted gene, 39743//predicted gene<br>predicted gene 9706//ISG15 ubiquitin-like modifier                                     | 0006278 // RNA-dependent DNA replication // inferred from electronic annotation//000815:<br>0019941 // modification-dependent protein catabolic process // inferred from direct assay//                                                                                                      |
| NM_027399                                     | 0.007                   | 2.612                   | <b>Steap1</b>                                                                                                          | six transmembrane epithelial antigen of the prostate 1                                                                                                 | 0006810 // transport // inferred from electronic annotation//0006811 // ion transport // inf                                                                                                                                                                                                 |
| NM_011407                                     | 0.008                   | 2.635                   | <b>Slfn1</b>                                                                                                           | schlafen 1                                                                                                                                             | 0000122 // negative regulation of transcription from RNA polymerase II promoter // inferred                                                                                                                                                                                                  |
| NM_145227//XM_006                             | 0.000                   | 2.656                   | <b>Oas2</b>                                                                                                            | 2'-5' oligoadenylate synthetase 2                                                                                                                      | 0002376 // immune system process // inferred from electronic annotation//0006164 // puri                                                                                                                                                                                                     |
| NM_010370                                     | 0.000                   | 2.669                   | <b>Gzma</b>                                                                                                            | granzyme A                                                                                                                                             | 0006508 // proteolysis // inferred from electronic annotation//0006915 // apoptotic process                                                                                                                                                                                                  |
| NM_001281830//NM_015783//XR_168               | 0.030<br>0.000          | 2.683<br>2.852          | <b>Ifi272a</b><br><b>Gm9706</b> /// <b>Isg15</b>                                                                       | interferon, alpha-inducible protein 27 like 2A<br>predicted gene 9706//ISG15 ubiquitin-like modifier                                                   | 0007568 // aging // inferred from direct assay//0009615 // response to virus // inferred from                                                                                                                                                                                                |
| NM_001001179                                  | 0.001                   | 2.933                   | <b>BC048546</b>                                                                                                        | cDNA sequence BC048546                                                                                                                                 | 0010466 // negative regulation of peptidase activity // inferred from electronic annotation//                                                                                                                                                                                                |
| NM_001162883//NM_001081180//XM_145423         | 0.000<br>0.020          | 2.948<br>3.086          | <b>Apol9a</b> /// <b>Apol9b</b><br><b>Spink5</b>                                                                       | apolipoprotein L 9a//apolipoprotein L 9b<br>serine peptidase inhibitor, kazal type 5                                                                   | 0006869 // lipid transport // inferred from electronic annotation//0042157 // lipoprotein me<br>0002787 // negative regulation of antibacterial peptide production // inferred from mutant pl                                                                                                |
| NM_016771                                     | 0.043                   | 3.187                   | <b>Slc5a8</b>                                                                                                          | solute carrier family 5 (iodide transporter), member 8                                                                                                 | 0006810 // transport // inferred from electronic annotation//0006811 // ion transport // inf                                                                                                                                                                                                 |
| NM_018751                                     | 0.037<br>0.000          | 3.249<br>3.269          | <b>Sult1d1</b><br><b>Sult1c1</b>                                                                                       | sulfotransferase family 1D, member 1<br>sulfotransferase family, cytosolic, 1C, member 1                                                               | 0000103 // sulfate assimilation // inferred from direct assay//0006584 // catecholamine met<br>0006790 // sulfur compound metabolic process // inferred from direct assay                                                                                                                    |

| RefSeq Transcript ID                                              | p       | FD Air | Gene Symbol                               | Gene Title                                                                                 | Gene Ontology                                                                                  |
|-------------------------------------------------------------------|---------|--------|-------------------------------------------|--------------------------------------------------------------------------------------------|------------------------------------------------------------------------------------------------|
| NM_001252600//NM_0011854//XM_001010243                            | 0.000   | 3.343  | <b>Irf7</b>                               | interferon regulatory factor 7                                                             | 0002376 // immune system process // inferred from electronic annotation//0002819 // regu       |
| NM_011854//XM_001010243                                           | 0.000   | 3.351  | <b>Oasl2</b>                              | 2'-5' oligoadenylate synthetase-like 2                                                     | 0002376 // immune system process // inferred from electronic annotation//0006164 // puri       |
| NM_010243                                                         | 0.007   | 3.358  | <b>Fut9</b>                               | fucosyltransferase 9                                                                       | 0006486 // protein glycosylation // inferred from direct assay//0007399 // nervous system d    |
| NM_177406                                                         | 0.042   | 3.418  | <b>Cyp4a12a</b>                           | cytochrome P450, family 4, subfamily a, polypeptide 12a                                    | 0006631 // fatty acid metabolic process // inferred from sequence or structural similarity//01 |
| NM_028801//XM_001021384//XM_011145211//XM_001027416               | 0.000   | 3.518  | <b>Muc5b</b>                              | mucin 5, subtype B, tracheobronchial                                                       | 0042742 // defense response to bacterium // inferred from mutant phenotype//0043030 //         |
| NM_021384//XM_011145211//XM_001027416                             | 0.000   | 3.553  | <b>Rsad2</b>                              | radical S-adenosyl methionine domain containing 2                                          | 0001503 // ossification // not recorded//0002376 // immune system process // inferred from     |
| NM_145211//XM_001027416                                           | 0.000   | 3.660  | <b>Oasl1a</b>                             | 2'-5' oligoadenylate synthetase 1A                                                         | 0002376 // immune system process // inferred from electronic annotation//0006164 // puri       |
| NM_027416                                                         | 0.044   | 3.685  | <b>Calml3</b>                             | calmodulin-like 3                                                                          | 0005509 // calcium ion binding // inferred from electronic annotation//0005515 // protein b    |
| NM_054037//NM_17133238                                            | 0.044   | 3.847  | <b>Scgb3a1</b>                            | secretoglobin, family 3A, member 1                                                         | 1901741 // positive regulation of myoblast fusion // inferred from mutant phenotype            |
| NM_133238                                                         | 0.009   | 4.009  | <b>Cd209a</b>                             | CD209a antigen                                                                             | 0006897 // endocytosis // inferred from electronic annotation//0010468 // regulation of ger    |
| NM_001033767//XM_011238903//XM_133871//XM_001009244//XM_001011783 | 0.000   | 4.068  | <b>Gm4951</b>                             | predicted gene 4951                                                                        | 0035458 // cellular response to interferon-beta // inferred from direct assay                  |
| XM_011238903//XM_133871//XM_001009244//XM_001011783               | 0.022   | 4.822  | <b>Gm37416//Gm39743//Gm40611//Gm40611</b> | predicted gene, 37416//predicted gene, 39743//predicted gene, 37416//predicted gene, 39743 | 0006278 // RNA-dependent DNA replication // inferred from electronic annotation//000815:       |
| NM_133871//XM_001009244//XM_001011783                             | 0.000   | 5.044  | <b>Ifi44</b>                              | interferon-induced protein 44                                                              | 0005737 // cytoplasm // inferred from electronic annotation                                    |
| NM_009244//XM_001011783                                           | 0.011   | 5.159  | <b>Serpina1b</b>                          | serine (or cysteine) preptidase inhibitor, clade A, member 1B                              | 0001701 // in utero embryonic development // inferred from mutant phenotype//0006487 /         |
| NM_011783                                                         | 0.002   | 5.455  | <b>Agr2</b>                               | anterior gradient 2                                                                        | 0010628 // positive regulation of gene expression // not recorded//0010811 // positive regu    |
| NM_017474//XM_001001302559//NM_011315                             | 0.010   | 5.554  | <b>Clca1//Clca3a1//Clca2//Clca3a2</b>     | chloride channel accessory 1//chloride channel accessory 3A1//                             | 0006508 // proteolysis // inferred from electronic annotation//0006810 // transport // infer   |
| NM_001302559//NM_011315                                           | 0.000   | 6.148  | <b>Slfn4//Slfn3</b>                       | schlafen 4//schlafen 3                                                                     | 0008285 // negative regulation of cell proliferation // inferred from direct assay             |
| NM_011315                                                         | 0.000   | 6.202  | <b>Saa3</b>                               | serum amyloid A 3                                                                          | 0006953 // acute-phase response // inferred from electronic annotation//0007252 // I-kapp:     |
| XM_011238903//XM_031367                                           | 0.046   | 6.504  | <b>Gm3579//Gm40514//Gm40814//Gm40814</b>  | predicted gene 3579//predicted gene, 40514//predicted gene, 40514//predicted gene, 40514   | 0015074 // DNA integration // inferred from electronic annotation//0090502 // RNA phosph       |
| NM_031367                                                         | 0.000   | 8.278  | <b>Ifi44l</b>                             | interferon-induced protein 44 like                                                         | 0006955 // immune response // inferred from direct assay                                       |
| NM_001012392//NM_025989//XM_001011260                             | 0.016   | 8.872  | <b>Bpifb1</b>                             | BPI fold containing family B, member 1                                                     | 0002227 // innate immune response in mucosa // not recorded//0002376 // immune system          |
| NM_025989//XM_001011260                                           | 0.000   | 10.017 | <b>Gp2</b>                                | glycoprotein 2 (zymogen granule membrane)                                                  | 0002412 // antigen transcytosis by M cells in mucosal-associated lymphoid tissue // inferred f |
| NM_011260                                                         | 0.00421 | 25.756 | <b>Reg3g</b>                              | regenerating islet-derived 3 gamma                                                         | 0002755 // MyD88-dependent toll-like receptor signaling pathway // inferred from mutant pt     |



Table S6. Nfk1b-dependently modulated lung genes after ozone (0.3 ppm, 48 hr) exposure.

Selected genes varied >1.5-fold between Nfk1b-WT and Nfk1b-KO mice (positive-higher in KO-O3, negative-lower in KO-O3, compared to WT-O3).

Afymetrix\_GeneChip\_Mouse430\_2\_2-Way ANOVA (p<0.05). Order by fold difference (FD) between WT and KO. FC=fold change by O3 in each genotype.

| RefSeq                                                                                                                                                                                                                                                                                                                                                                                                                                                                                                                                                                                                                                                                                                                                                                                                                                                                                                                                                                                                                                                                                                                                                                                                                                                                                                                                                                                                                                                                                                                                                                                                                                                                                                                                                                                                                                                                                                                                                                                                                                                                                                                                                                                                                                                                                                                                                                                                                                                                                                                                                                                                                                                                                                                                                                                                                                                                                                                                                                                                                                                                                                                                                                                                                                                                                                                                                                                                                                                                                                                                                                                                                                                                                                                                                                                                                                                                                                                                                                                                                                                                                                                                                                                                                                                                                                                                                                                                                                                                                                                                                                                                                                                                                                                                                                                                                                                                                                                                                                                                                                                                                                                                                                                                                                                                                                                                                                                                                                                                                                                                                                                                                                                                                                                                                                                                                                                                                                                                                                                                                                                                                                                                                                                                                                                                                                                                                                                                                                                                                                                                                                                                                                                                                                                                                                                                                                                                                                                                                                                                                                                                                                                                                             | Transcript ID | p (Genotype) | p (Genotype-Exposure) | Z (p Exposure) | FC WT/O3 | FC KO/O3 | FC Air WT/KO | FC O3 WT/KO | Gene Symbol               | Gene Title                                                                 | Gene Ontology Biological Process                                                                                                                                                                                                                                                                                                                                                                                   |
|--------------------------------------------------------------------------------------------------------------------------------------------------------------------------------------------------------------------------------------------------------------------------------------------------------------------------------------------------------------------------------------------------------------------------------------------------------------------------------------------------------------------------------------------------------------------------------------------------------------------------------------------------------------------------------------------------------------------------------------------------------------------------------------------------------------------------------------------------------------------------------------------------------------------------------------------------------------------------------------------------------------------------------------------------------------------------------------------------------------------------------------------------------------------------------------------------------------------------------------------------------------------------------------------------------------------------------------------------------------------------------------------------------------------------------------------------------------------------------------------------------------------------------------------------------------------------------------------------------------------------------------------------------------------------------------------------------------------------------------------------------------------------------------------------------------------------------------------------------------------------------------------------------------------------------------------------------------------------------------------------------------------------------------------------------------------------------------------------------------------------------------------------------------------------------------------------------------------------------------------------------------------------------------------------------------------------------------------------------------------------------------------------------------------------------------------------------------------------------------------------------------------------------------------------------------------------------------------------------------------------------------------------------------------------------------------------------------------------------------------------------------------------------------------------------------------------------------------------------------------------------------------------------------------------------------------------------------------------------------------------------------------------------------------------------------------------------------------------------------------------------------------------------------------------------------------------------------------------------------------------------------------------------------------------------------------------------------------------------------------------------------------------------------------------------------------------------------------------------------------------------------------------------------------------------------------------------------------------------------------------------------------------------------------------------------------------------------------------------------------------------------------------------------------------------------------------------------------------------------------------------------------------------------------------------------------------------------------------------------------------------------------------------------------------------------------------------------------------------------------------------------------------------------------------------------------------------------------------------------------------------------------------------------------------------------------------------------------------------------------------------------------------------------------------------------------------------------------------------------------------------------------------------------------------------------------------------------------------------------------------------------------------------------------------------------------------------------------------------------------------------------------------------------------------------------------------------------------------------------------------------------------------------------------------------------------------------------------------------------------------------------------------------------------------------------------------------------------------------------------------------------------------------------------------------------------------------------------------------------------------------------------------------------------------------------------------------------------------------------------------------------------------------------------------------------------------------------------------------------------------------------------------------------------------------------------------------------------------------------------------------------------------------------------------------------------------------------------------------------------------------------------------------------------------------------------------------------------------------------------------------------------------------------------------------------------------------------------------------------------------------------------------------------------------------------------------------------------------------------------------------------------------------------------------------------------------------------------------------------------------------------------------------------------------------------------------------------------------------------------------------------------------------------------------------------------------------------------------------------------------------------------------------------------------------------------------------------------------------------------------------------------------------------------------------------------------------------------------------------------------------------------------------------------------------------------------------------------------------------------------------------------------------------------------------------------------------------------------------------------------------------------------------------------------------------------------------------------------------------------------------------------------------------------|---------------|--------------|-----------------------|----------------|----------|----------|--------------|-------------|---------------------------|----------------------------------------------------------------------------|--------------------------------------------------------------------------------------------------------------------------------------------------------------------------------------------------------------------------------------------------------------------------------------------------------------------------------------------------------------------------------------------------------------------|
| NM_028216                                                                                                                                                                                                                                                                                                                                                                                                                                                                                                                                                                                                                                                                                                                                                                                                                                                                                                                                                                                                                                                                                                                                                                                                                                                                                                                                                                                                                                                                                                                                                                                                                                                                                                                                                                                                                                                                                                                                                                                                                                                                                                                                                                                                                                                                                                                                                                                                                                                                                                                                                                                                                                                                                                                                                                                                                                                                                                                                                                                                                                                                                                                                                                                                                                                                                                                                                                                                                                                                                                                                                                                                                                                                                                                                                                                                                                                                                                                                                                                                                                                                                                                                                                                                                                                                                                                                                                                                                                                                                                                                                                                                                                                                                                                                                                                                                                                                                                                                                                                                                                                                                                                                                                                                                                                                                                                                                                                                                                                                                                                                                                                                                                                                                                                                                                                                                                                                                                                                                                                                                                                                                                                                                                                                                                                                                                                                                                                                                                                                                                                                                                                                                                                                                                                                                                                                                                                                                                                                                                                                                                                                                                                                                          |               | 2.08E-04     | 0.002125263           | 4.99E-04       | 8.88     | 1.24     | -1.51        | -10.87      | <i>Pcco</i>               | prostate stem cell antigen                                                 |                                                                                                                                                                                                                                                                                                                                                                                                                    |
| NM_007394                                                                                                                                                                                                                                                                                                                                                                                                                                                                                                                                                                                                                                                                                                                                                                                                                                                                                                                                                                                                                                                                                                                                                                                                                                                                                                                                                                                                                                                                                                                                                                                                                                                                                                                                                                                                                                                                                                                                                                                                                                                                                                                                                                                                                                                                                                                                                                                                                                                                                                                                                                                                                                                                                                                                                                                                                                                                                                                                                                                                                                                                                                                                                                                                                                                                                                                                                                                                                                                                                                                                                                                                                                                                                                                                                                                                                                                                                                                                                                                                                                                                                                                                                                                                                                                                                                                                                                                                                                                                                                                                                                                                                                                                                                                                                                                                                                                                                                                                                                                                                                                                                                                                                                                                                                                                                                                                                                                                                                                                                                                                                                                                                                                                                                                                                                                                                                                                                                                                                                                                                                                                                                                                                                                                                                                                                                                                                                                                                                                                                                                                                                                                                                                                                                                                                                                                                                                                                                                                                                                                                                                                                                                                                          |               | 0.003934348  | 0.013873396           | 0.004998094    | 5.31     | 1.19     | -1.27        | -5.70       | <i>Ptpa2</i>              | fructose biphosphatase 2                                                   | 0005975 // carbohydrate metabolic process // inferred from electronic annotation//0006004 // gluconeogenesis, 0001558 // regulation of cell growth // not recorded//0006281 // DNA repair // inferred from electronic annotation                                                                                                                                                                                   |
| NM_001131054//NM_0113911//NM_006533515//NM_006533516                                                                                                                                                                                                                                                                                                                                                                                                                                                                                                                                                                                                                                                                                                                                                                                                                                                                                                                                                                                                                                                                                                                                                                                                                                                                                                                                                                                                                                                                                                                                                                                                                                                                                                                                                                                                                                                                                                                                                                                                                                                                                                                                                                                                                                                                                                                                                                                                                                                                                                                                                                                                                                                                                                                                                                                                                                                                                                                                                                                                                                                                                                                                                                                                                                                                                                                                                                                                                                                                                                                                                                                                                                                                                                                                                                                                                                                                                                                                                                                                                                                                                                                                                                                                                                                                                                                                                                                                                                                                                                                                                                                                                                                                                                                                                                                                                                                                                                                                                                                                                                                                                                                                                                                                                                                                                                                                                                                                                                                                                                                                                                                                                                                                                                                                                                                                                                                                                                                                                                                                                                                                                                                                                                                                                                                                                                                                                                                                                                                                                                                                                                                                                                                                                                                                                                                                                                                                                                                                                                                                                                                                                                               |               |              |                       |                | -2.12    | -1.70    | -3.51        | -2.81       | <i>Pttg1</i>              | pituitary tumor-transforming gene 1                                        | 0008152 // metabolic process // inferred from electronic annotation                                                                                                                                                                                                                                                                                                                                                |
| NM_001081328                                                                                                                                                                                                                                                                                                                                                                                                                                                                                                                                                                                                                                                                                                                                                                                                                                                                                                                                                                                                                                                                                                                                                                                                                                                                                                                                                                                                                                                                                                                                                                                                                                                                                                                                                                                                                                                                                                                                                                                                                                                                                                                                                                                                                                                                                                                                                                                                                                                                                                                                                                                                                                                                                                                                                                                                                                                                                                                                                                                                                                                                                                                                                                                                                                                                                                                                                                                                                                                                                                                                                                                                                                                                                                                                                                                                                                                                                                                                                                                                                                                                                                                                                                                                                                                                                                                                                                                                                                                                                                                                                                                                                                                                                                                                                                                                                                                                                                                                                                                                                                                                                                                                                                                                                                                                                                                                                                                                                                                                                                                                                                                                                                                                                                                                                                                                                                                                                                                                                                                                                                                                                                                                                                                                                                                                                                                                                                                                                                                                                                                                                                                                                                                                                                                                                                                                                                                                                                                                                                                                                                                                                                                                                       |               |              |                       |                | 3.07     | 2.21     | -1.95        | -2.71       | <i>Chsy3</i>              | chondroitin sulfate synthase 3                                             | 0002100 // tRNA wobble adenosine to inosine editing // inferred from electronic annotation//0006400 // tRNA m 0018149 // peptide cross-linking // not recorded//0003216 // keratinocyte differentiation // not recorded//00331                                                                                                                                                                                     |
| NM_025748//NM_011243200                                                                                                                                                                                                                                                                                                                                                                                                                                                                                                                                                                                                                                                                                                                                                                                                                                                                                                                                                                                                                                                                                                                                                                                                                                                                                                                                                                                                                                                                                                                                                                                                                                                                                                                                                                                                                                                                                                                                                                                                                                                                                                                                                                                                                                                                                                                                                                                                                                                                                                                                                                                                                                                                                                                                                                                                                                                                                                                                                                                                                                                                                                                                                                                                                                                                                                                                                                                                                                                                                                                                                                                                                                                                                                                                                                                                                                                                                                                                                                                                                                                                                                                                                                                                                                                                                                                                                                                                                                                                                                                                                                                                                                                                                                                                                                                                                                                                                                                                                                                                                                                                                                                                                                                                                                                                                                                                                                                                                                                                                                                                                                                                                                                                                                                                                                                                                                                                                                                                                                                                                                                                                                                                                                                                                                                                                                                                                                                                                                                                                                                                                                                                                                                                                                                                                                                                                                                                                                                                                                                                                                                                                                                                            |               |              |                       |                | 1.98     | 1.56     | -2.07        | -2.63       | <i>Adot2</i>              | adenosine deaminase, tRNA-specific 2                                       |                                                                                                                                                                                                                                                                                                                                                                                                                    |
| NM_009264                                                                                                                                                                                                                                                                                                                                                                                                                                                                                                                                                                                                                                                                                                                                                                                                                                                                                                                                                                                                                                                                                                                                                                                                                                                                                                                                                                                                                                                                                                                                                                                                                                                                                                                                                                                                                                                                                                                                                                                                                                                                                                                                                                                                                                                                                                                                                                                                                                                                                                                                                                                                                                                                                                                                                                                                                                                                                                                                                                                                                                                                                                                                                                                                                                                                                                                                                                                                                                                                                                                                                                                                                                                                                                                                                                                                                                                                                                                                                                                                                                                                                                                                                                                                                                                                                                                                                                                                                                                                                                                                                                                                                                                                                                                                                                                                                                                                                                                                                                                                                                                                                                                                                                                                                                                                                                                                                                                                                                                                                                                                                                                                                                                                                                                                                                                                                                                                                                                                                                                                                                                                                                                                                                                                                                                                                                                                                                                                                                                                                                                                                                                                                                                                                                                                                                                                                                                                                                                                                                                                                                                                                                                                                          |               | 0.31510517   | 0.002185997           | 7.96E-07       | 21.03    | 5.00     | 1.67         | -2.52       | <i>Spr1a</i>              | small proline-rich protein 1A                                              |                                                                                                                                                                                                                                                                                                                                                                                                                    |
| NM_013069//NM_1                                                                                                                                                                                                                                                                                                                                                                                                                                                                                                                                                                                                                                                                                                                                                                                                                                                                                                                                                                                                                                                                                                                                                                                                                                                                                                                                                                                                                                                                                                                                                                                                                                                                                                                                                                                                                                                                                                                                                                                                                                                                                                                                                                                                                                                                                                                                                                                                                                                                                                                                                                                                                                                                                                                                                                                                                                                                                                                                                                                                                                                                                                                                                                                                                                                                                                                                                                                                                                                                                                                                                                                                                                                                                                                                                                                                                                                                                                                                                                                                                                                                                                                                                                                                                                                                                                                                                                                                                                                                                                                                                                                                                                                                                                                                                                                                                                                                                                                                                                                                                                                                                                                                                                                                                                                                                                                                                                                                                                                                                                                                                                                                                                                                                                                                                                                                                                                                                                                                                                                                                                                                                                                                                                                                                                                                                                                                                                                                                                                                                                                                                                                                                                                                                                                                                                                                                                                                                                                                                                                                                                                                                                                                                    |               | 1.26E-04     | 0.005971318           | 0.008376999    | 1.83     | -1.09    | -1.26        | -2.51       | <i>Nxpe2</i>              | neurexophilin and PC-esterase domain family, member 2                      |                                                                                                                                                                                                                                                                                                                                                                                                                    |
| NM_172301//NM_1                                                                                                                                                                                                                                                                                                                                                                                                                                                                                                                                                                                                                                                                                                                                                                                                                                                                                                                                                                                                                                                                                                                                                                                                                                                                                                                                                                                                                                                                                                                                                                                                                                                                                                                                                                                                                                                                                                                                                                                                                                                                                                                                                                                                                                                                                                                                                                                                                                                                                                                                                                                                                                                                                                                                                                                                                                                                                                                                                                                                                                                                                                                                                                                                                                                                                                                                                                                                                                                                                                                                                                                                                                                                                                                                                                                                                                                                                                                                                                                                                                                                                                                                                                                                                                                                                                                                                                                                                                                                                                                                                                                                                                                                                                                                                                                                                                                                                                                                                                                                                                                                                                                                                                                                                                                                                                                                                                                                                                                                                                                                                                                                                                                                                                                                                                                                                                                                                                                                                                                                                                                                                                                                                                                                                                                                                                                                                                                                                                                                                                                                                                                                                                                                                                                                                                                                                                                                                                                                                                                                                                                                                                                                                    |               | 0.27635863   | 0.026451888           | 0.03953187     | 3.23     | -1.15    | 1.52         | -2.44       | <i>Ccnb1</i>              | cyclin B1                                                                  | 0000278 // mitotic cell cycle // inferred from electronic annotation//0001556 // oocyte maturation // not recorded                                                                                                                                                                                                                                                                                                 |
| NM_001177544//NM_1                                                                                                                                                                                                                                                                                                                                                                                                                                                                                                                                                                                                                                                                                                                                                                                                                                                                                                                                                                                                                                                                                                                                                                                                                                                                                                                                                                                                                                                                                                                                                                                                                                                                                                                                                                                                                                                                                                                                                                                                                                                                                                                                                                                                                                                                                                                                                                                                                                                                                                                                                                                                                                                                                                                                                                                                                                                                                                                                                                                                                                                                                                                                                                                                                                                                                                                                                                                                                                                                                                                                                                                                                                                                                                                                                                                                                                                                                                                                                                                                                                                                                                                                                                                                                                                                                                                                                                                                                                                                                                                                                                                                                                                                                                                                                                                                                                                                                                                                                                                                                                                                                                                                                                                                                                                                                                                                                                                                                                                                                                                                                                                                                                                                                                                                                                                                                                                                                                                                                                                                                                                                                                                                                                                                                                                                                                                                                                                                                                                                                                                                                                                                                                                                                                                                                                                                                                                                                                                                                                                                                                                                                                                                                 |               | 0.06527217   | 0.045352243           | 0.01881624     | 2.88     | 1.23     | -1.03        | -2.42       | <i>Histh2oo//Histh2op</i> | histone cluster 1, H2ao//histone cluster 1, H2ap                           | 0006325 // chromatin organization // not recorded//0006342 // chromatin silencing // not recorded//0008285 //                                                                                                                                                                                                                                                                                                      |
| NM_010295//NM_1                                                                                                                                                                                                                                                                                                                                                                                                                                                                                                                                                                                                                                                                                                                                                                                                                                                                                                                                                                                                                                                                                                                                                                                                                                                                                                                                                                                                                                                                                                                                                                                                                                                                                                                                                                                                                                                                                                                                                                                                                                                                                                                                                                                                                                                                                                                                                                                                                                                                                                                                                                                                                                                                                                                                                                                                                                                                                                                                                                                                                                                                                                                                                                                                                                                                                                                                                                                                                                                                                                                                                                                                                                                                                                                                                                                                                                                                                                                                                                                                                                                                                                                                                                                                                                                                                                                                                                                                                                                                                                                                                                                                                                                                                                                                                                                                                                                                                                                                                                                                                                                                                                                                                                                                                                                                                                                                                                                                                                                                                                                                                                                                                                                                                                                                                                                                                                                                                                                                                                                                                                                                                                                                                                                                                                                                                                                                                                                                                                                                                                                                                                                                                                                                                                                                                                                                                                                                                                                                                                                                                                                                                                                                                    |               | 1.68E-04     | 0.003448708           | 0.004016006    | 1.97     | 1.07     | -1.30        | -2.38       | <i>Gic</i>                | glutamate-cysteine ligase, catalytic subunit                               | 0006534 // cysteine metabolic process // not recorded//0006535 // glutamate metabolic process // not recorded, 0001889 // liver development // inferred from electronic annotation//0006351 // transcription, DNA-templated, 0006463 // protein complex assembly // not recorded//0006468 // protein phosphorylation // inferred from direct                                                                       |
| NM_007659                                                                                                                                                                                                                                                                                                                                                                                                                                                                                                                                                                                                                                                                                                                                                                                                                                                                                                                                                                                                                                                                                                                                                                                                                                                                                                                                                                                                                                                                                                                                                                                                                                                                                                                                                                                                                                                                                                                                                                                                                                                                                                                                                                                                                                                                                                                                                                                                                                                                                                                                                                                                                                                                                                                                                                                                                                                                                                                                                                                                                                                                                                                                                                                                                                                                                                                                                                                                                                                                                                                                                                                                                                                                                                                                                                                                                                                                                                                                                                                                                                                                                                                                                                                                                                                                                                                                                                                                                                                                                                                                                                                                                                                                                                                                                                                                                                                                                                                                                                                                                                                                                                                                                                                                                                                                                                                                                                                                                                                                                                                                                                                                                                                                                                                                                                                                                                                                                                                                                                                                                                                                                                                                                                                                                                                                                                                                                                                                                                                                                                                                                                                                                                                                                                                                                                                                                                                                                                                                                                                                                                                                                                                                                          |               | 0.19335605   | 0.042050056           | 0.056642193    | 2.77     | -1.04    | 1.32         | -2.18       | <i>Cdk1</i>               | cyclin-dependent kinase 1                                                  | 0002548 // monocytic chemotaxis // --//0006935 // chemotaxis // traceable author statement//0006954 // infla 0002244 // hematopoietic progenitor cell differentiation // inferred from genetic interaction//0006275 // regulat                                                                                                                                                                                     |
| NM_011332//NM_1                                                                                                                                                                                                                                                                                                                                                                                                                                                                                                                                                                                                                                                                                                                                                                                                                                                                                                                                                                                                                                                                                                                                                                                                                                                                                                                                                                                                                                                                                                                                                                                                                                                                                                                                                                                                                                                                                                                                                                                                                                                                                                                                                                                                                                                                                                                                                                                                                                                                                                                                                                                                                                                                                                                                                                                                                                                                                                                                                                                                                                                                                                                                                                                                                                                                                                                                                                                                                                                                                                                                                                                                                                                                                                                                                                                                                                                                                                                                                                                                                                                                                                                                                                                                                                                                                                                                                                                                                                                                                                                                                                                                                                                                                                                                                                                                                                                                                                                                                                                                                                                                                                                                                                                                                                                                                                                                                                                                                                                                                                                                                                                                                                                                                                                                                                                                                                                                                                                                                                                                                                                                                                                                                                                                                                                                                                                                                                                                                                                                                                                                                                                                                                                                                                                                                                                                                                                                                                                                                                                                                                                                                                                                                    |               | 0.25220744   | 0.015234006           | 1.71E-05       | 4.96     | 2.29     | 1.01         | -2.16       | <i>Ccl17</i>              | chemokine (C-C motif) ligand 17                                            | 0002029 // protein polyubiquitination // not recorded//0006511 // ubiquitin-dependent protein catabolic process                                                                                                                                                                                                                                                                                                    |
| NM_028039                                                                                                                                                                                                                                                                                                                                                                                                                                                                                                                                                                                                                                                                                                                                                                                                                                                                                                                                                                                                                                                                                                                                                                                                                                                                                                                                                                                                                                                                                                                                                                                                                                                                                                                                                                                                                                                                                                                                                                                                                                                                                                                                                                                                                                                                                                                                                                                                                                                                                                                                                                                                                                                                                                                                                                                                                                                                                                                                                                                                                                                                                                                                                                                                                                                                                                                                                                                                                                                                                                                                                                                                                                                                                                                                                                                                                                                                                                                                                                                                                                                                                                                                                                                                                                                                                                                                                                                                                                                                                                                                                                                                                                                                                                                                                                                                                                                                                                                                                                                                                                                                                                                                                                                                                                                                                                                                                                                                                                                                                                                                                                                                                                                                                                                                                                                                                                                                                                                                                                                                                                                                                                                                                                                                                                                                                                                                                                                                                                                                                                                                                                                                                                                                                                                                                                                                                                                                                                                                                                                                                                                                                                                                                          |               | 0.3708932    | 0.043021165           | 0.06698847     | 2.62     | -1.07    | 1.35         | -2.07       | <i>Esco2</i>              | establishment of cohesion 1 homolog 2 (S. cerevisiae)                      | 0001656 // metanephros development // inferred from mutant phenotype//0006810 // transport // inferred from                                                                                                                                                                                                                                                                                                        |
| NM_026785                                                                                                                                                                                                                                                                                                                                                                                                                                                                                                                                                                                                                                                                                                                                                                                                                                                                                                                                                                                                                                                                                                                                                                                                                                                                                                                                                                                                                                                                                                                                                                                                                                                                                                                                                                                                                                                                                                                                                                                                                                                                                                                                                                                                                                                                                                                                                                                                                                                                                                                                                                                                                                                                                                                                                                                                                                                                                                                                                                                                                                                                                                                                                                                                                                                                                                                                                                                                                                                                                                                                                                                                                                                                                                                                                                                                                                                                                                                                                                                                                                                                                                                                                                                                                                                                                                                                                                                                                                                                                                                                                                                                                                                                                                                                                                                                                                                                                                                                                                                                                                                                                                                                                                                                                                                                                                                                                                                                                                                                                                                                                                                                                                                                                                                                                                                                                                                                                                                                                                                                                                                                                                                                                                                                                                                                                                                                                                                                                                                                                                                                                                                                                                                                                                                                                                                                                                                                                                                                                                                                                                                                                                                                                          |               | 0.10046281   | 0.006311119           | 0.12935555     | 1.96     | -1.23    | 1.18         | -2.04       | <i>Ube2c</i>              | ubiquitin-conjugating enzyme E2C                                           | 0007596 // blood coagulation // inferred from electronic annotation//0005759 // hemostasis // inferred from ele 0000070 // mitotic sister chromatid segregation // --//0007049 // cell cycle // inferred from electronic annotatio                                                                                                                                                                                 |
| NM_010910                                                                                                                                                                                                                                                                                                                                                                                                                                                                                                                                                                                                                                                                                                                                                                                                                                                                                                                                                                                                                                                                                                                                                                                                                                                                                                                                                                                                                                                                                                                                                                                                                                                                                                                                                                                                                                                                                                                                                                                                                                                                                                                                                                                                                                                                                                                                                                                                                                                                                                                                                                                                                                                                                                                                                                                                                                                                                                                                                                                                                                                                                                                                                                                                                                                                                                                                                                                                                                                                                                                                                                                                                                                                                                                                                                                                                                                                                                                                                                                                                                                                                                                                                                                                                                                                                                                                                                                                                                                                                                                                                                                                                                                                                                                                                                                                                                                                                                                                                                                                                                                                                                                                                                                                                                                                                                                                                                                                                                                                                                                                                                                                                                                                                                                                                                                                                                                                                                                                                                                                                                                                                                                                                                                                                                                                                                                                                                                                                                                                                                                                                                                                                                                                                                                                                                                                                                                                                                                                                                                                                                                                                                                                                          |               | 4.43E-04     | 0.003642625           | 1.30E-04       | 2.13     | 1.15     | -1.09        | -2.02       | <i>Sic1a1</i>             | solute carrier family 5 (sodium/glucose cotransporter), member 1           | 0006508 // proteolysis // inferred from mutant phenotype//0006508 // proteolysis // not recorded//0010727 //                                                                                                                                                                                                                                                                                                       |
| NM_009364//NM_006505043//NM_006505044//NM_011241055//NM_0011                                                                                                                                                                                                                                                                                                                                                                                                                                                                                                                                                                                                                                                                                                                                                                                                                                                                                                                                                                                                                                                                                                                                                                                                                                                                                                                                                                                                                                                                                                                                                                                                                                                                                                                                                                                                                                                                                                                                                                                                                                                                                                                                                                                                                                                                                                                                                                                                                                                                                                                                                                                                                                                                                                                                                                                                                                                                                                                                                                                                                                                                                                                                                                                                                                                                                                                                                                                                                                                                                                                                                                                                                                                                                                                                                                                                                                                                                                                                                                                                                                                                                                                                                                                                                                                                                                                                                                                                                                                                                                                                                                                                                                                                                                                                                                                                                                                                                                                                                                                                                                                                                                                                                                                                                                                                                                                                                                                                                                                                                                                                                                                                                                                                                                                                                                                                                                                                                                                                                                                                                                                                                                                                                                                                                                                                                                                                                                                                                                                                                                                                                                                                                                                                                                                                                                                                                                                                                                                                                                                                                                                                                                       |               |              |                       |                | 2.14     | 2.49     | -2.34        | -2.02       | <i>Tjp2</i>               | tissue factor pathway inhibitor 2                                          | 0001012 // negative regulation of transcription from RNA polymerase II promoter // not recorded//0005978 // gh 0000079 // regulation of cyclin-dependent protein serine/threonine kinase activity // inferred from electronic annot                                                                                                                                                                                |
| NM_010809                                                                                                                                                                                                                                                                                                                                                                                                                                                                                                                                                                                                                                                                                                                                                                                                                                                                                                                                                                                                                                                                                                                                                                                                                                                                                                                                                                                                                                                                                                                                                                                                                                                                                                                                                                                                                                                                                                                                                                                                                                                                                                                                                                                                                                                                                                                                                                                                                                                                                                                                                                                                                                                                                                                                                                                                                                                                                                                                                                                                                                                                                                                                                                                                                                                                                                                                                                                                                                                                                                                                                                                                                                                                                                                                                                                                                                                                                                                                                                                                                                                                                                                                                                                                                                                                                                                                                                                                                                                                                                                                                                                                                                                                                                                                                                                                                                                                                                                                                                                                                                                                                                                                                                                                                                                                                                                                                                                                                                                                                                                                                                                                                                                                                                                                                                                                                                                                                                                                                                                                                                                                                                                                                                                                                                                                                                                                                                                                                                                                                                                                                                                                                                                                                                                                                                                                                                                                                                                                                                                                                                                                                                                                                          |               | 0.170261     | 0.041151717           | 0.01817487     | 2.44     | 1.01     | 1.22         | -1.98       | <i>Ccna8</i>              | cell division cycle-associated 8                                           | 0000086 // G2/M transition of mitotic cell cycle // not recorded//0001212 // negative regulation of transcription                                                                                                                                                                                                                                                                                                  |
| NM_010104                                                                                                                                                                                                                                                                                                                                                                                                                                                                                                                                                                                                                                                                                                                                                                                                                                                                                                                                                                                                                                                                                                                                                                                                                                                                                                                                                                                                                                                                                                                                                                                                                                                                                                                                                                                                                                                                                                                                                                                                                                                                                                                                                                                                                                                                                                                                                                                                                                                                                                                                                                                                                                                                                                                                                                                                                                                                                                                                                                                                                                                                                                                                                                                                                                                                                                                                                                                                                                                                                                                                                                                                                                                                                                                                                                                                                                                                                                                                                                                                                                                                                                                                                                                                                                                                                                                                                                                                                                                                                                                                                                                                                                                                                                                                                                                                                                                                                                                                                                                                                                                                                                                                                                                                                                                                                                                                                                                                                                                                                                                                                                                                                                                                                                                                                                                                                                                                                                                                                                                                                                                                                                                                                                                                                                                                                                                                                                                                                                                                                                                                                                                                                                                                                                                                                                                                                                                                                                                                                                                                                                                                                                                                                          |               | 0.007884334  | 0.020289894           | 0.14191255     | 1.62     | -1.05    | -1.16        | -1.96       | <i>Edn1</i>               | endothelin 1                                                               | 0001212 // negative regulation of transcription from RNA polymerase II promoter // not recorded//0001501 // sk 0002548 // monocytic chemotaxis // --//0006935 // chemotaxis // inferred from electronic annotation//0006955                                                                                                                                                                                        |
| NM_009137                                                                                                                                                                                                                                                                                                                                                                                                                                                                                                                                                                                                                                                                                                                                                                                                                                                                                                                                                                                                                                                                                                                                                                                                                                                                                                                                                                                                                                                                                                                                                                                                                                                                                                                                                                                                                                                                                                                                                                                                                                                                                                                                                                                                                                                                                                                                                                                                                                                                                                                                                                                                                                                                                                                                                                                                                                                                                                                                                                                                                                                                                                                                                                                                                                                                                                                                                                                                                                                                                                                                                                                                                                                                                                                                                                                                                                                                                                                                                                                                                                                                                                                                                                                                                                                                                                                                                                                                                                                                                                                                                                                                                                                                                                                                                                                                                                                                                                                                                                                                                                                                                                                                                                                                                                                                                                                                                                                                                                                                                                                                                                                                                                                                                                                                                                                                                                                                                                                                                                                                                                                                                                                                                                                                                                                                                                                                                                                                                                                                                                                                                                                                                                                                                                                                                                                                                                                                                                                                                                                                                                                                                                                                                          |               | 0.002550701  | 0.022045342           | 0.032397464    | 1.60     | -1.07    | -1.14        | -1.96       | <i>Ccl22</i>              | chemokine (C-C motif) ligand 22                                            | 0008543 // fibroblast growth factor receptor signaling pathway // inferred from mutant phenotype//2000177 // r 0000278 // mitotic cell cycle // inferred from electronic annotation//0001556 // oocyte maturation // not recorded                                                                                                                                                                                  |
| NM_011369                                                                                                                                                                                                                                                                                                                                                                                                                                                                                                                                                                                                                                                                                                                                                                                                                                                                                                                                                                                                                                                                                                                                                                                                                                                                                                                                                                                                                                                                                                                                                                                                                                                                                                                                                                                                                                                                                                                                                                                                                                                                                                                                                                                                                                                                                                                                                                                                                                                                                                                                                                                                                                                                                                                                                                                                                                                                                                                                                                                                                                                                                                                                                                                                                                                                                                                                                                                                                                                                                                                                                                                                                                                                                                                                                                                                                                                                                                                                                                                                                                                                                                                                                                                                                                                                                                                                                                                                                                                                                                                                                                                                                                                                                                                                                                                                                                                                                                                                                                                                                                                                                                                                                                                                                                                                                                                                                                                                                                                                                                                                                                                                                                                                                                                                                                                                                                                                                                                                                                                                                                                                                                                                                                                                                                                                                                                                                                                                                                                                                                                                                                                                                                                                                                                                                                                                                                                                                                                                                                                                                                                                                                                                                          |               | 0.07999367   | 0.01631937            | 0.001532258    | 2.69     | 1.18     | 1.16         | -1.95       | <i>Shcp1</i>              | Shc SH2-domain binding protein 1                                           | 0001012 // negative regulation of transcription from RNA polymerase II promoter // not recorded//0001818 // ne 0016310 // phosphorylation // inferred from electronic annotation                                                                                                                                                                                                                                   |
| NM_172301//NM_1                                                                                                                                                                                                                                                                                                                                                                                                                                                                                                                                                                                                                                                                                                                                                                                                                                                                                                                                                                                                                                                                                                                                                                                                                                                                                                                                                                                                                                                                                                                                                                                                                                                                                                                                                                                                                                                                                                                                                                                                                                                                                                                                                                                                                                                                                                                                                                                                                                                                                                                                                                                                                                                                                                                                                                                                                                                                                                                                                                                                                                                                                                                                                                                                                                                                                                                                                                                                                                                                                                                                                                                                                                                                                                                                                                                                                                                                                                                                                                                                                                                                                                                                                                                                                                                                                                                                                                                                                                                                                                                                                                                                                                                                                                                                                                                                                                                                                                                                                                                                                                                                                                                                                                                                                                                                                                                                                                                                                                                                                                                                                                                                                                                                                                                                                                                                                                                                                                                                                                                                                                                                                                                                                                                                                                                                                                                                                                                                                                                                                                                                                                                                                                                                                                                                                                                                                                                                                                                                                                                                                                                                                                                                                    |               | 0.22189107   | 0.0355218             | 0.03068305     | 2.35     | -1.07    | 1.30         | -1.95       | <i>Ccnb1//Gm5593</i>      | cyclin B1//predicted gene 5593                                             | 0000070 // mitotic sister chromatid segregation // not recorded//0000086 // G2/M transition of mitotic cell cycle 0001549 // osteoblast differentiation // not recorded//0007155 // cell adhesion // inferred from electronic annot 0000077 // DNA damage checkpoint // inferred from mutant phenotype//0000723 // telomere maintenance // uni 0008152 // metabolic process // inferred from electronic annotation |
| NM_008689//NM_006501106//NM_006501107                                                                                                                                                                                                                                                                                                                                                                                                                                                                                                                                                                                                                                                                                                                                                                                                                                                                                                                                                                                                                                                                                                                                                                                                                                                                                                                                                                                                                                                                                                                                                                                                                                                                                                                                                                                                                                                                                                                                                                                                                                                                                                                                                                                                                                                                                                                                                                                                                                                                                                                                                                                                                                                                                                                                                                                                                                                                                                                                                                                                                                                                                                                                                                                                                                                                                                                                                                                                                                                                                                                                                                                                                                                                                                                                                                                                                                                                                                                                                                                                                                                                                                                                                                                                                                                                                                                                                                                                                                                                                                                                                                                                                                                                                                                                                                                                                                                                                                                                                                                                                                                                                                                                                                                                                                                                                                                                                                                                                                                                                                                                                                                                                                                                                                                                                                                                                                                                                                                                                                                                                                                                                                                                                                                                                                                                                                                                                                                                                                                                                                                                                                                                                                                                                                                                                                                                                                                                                                                                                                                                                                                                                                                              |               |              |                       |                | -1.08    | -1.05    | -2.01        | -1.94       | <i>Nfk1b</i>              | nuclear factor of kappa light polypeptide gene enhancer in B cells 1, p105 | 0001568 // blood vessel development // inferred from mutant phenotype//0003158 // endothelium development 0007049 // cell cycle // inferred from electronic annotation//0007059 // chromosome segregation // not recorded                                                                                                                                                                                          |
| NM_177351                                                                                                                                                                                                                                                                                                                                                                                                                                                                                                                                                                                                                                                                                                                                                                                                                                                                                                                                                                                                                                                                                                                                                                                                                                                                                                                                                                                                                                                                                                                                                                                                                                                                                                                                                                                                                                                                                                                                                                                                                                                                                                                                                                                                                                                                                                                                                                                                                                                                                                                                                                                                                                                                                                                                                                                                                                                                                                                                                                                                                                                                                                                                                                                                                                                                                                                                                                                                                                                                                                                                                                                                                                                                                                                                                                                                                                                                                                                                                                                                                                                                                                                                                                                                                                                                                                                                                                                                                                                                                                                                                                                                                                                                                                                                                                                                                                                                                                                                                                                                                                                                                                                                                                                                                                                                                                                                                                                                                                                                                                                                                                                                                                                                                                                                                                                                                                                                                                                                                                                                                                                                                                                                                                                                                                                                                                                                                                                                                                                                                                                                                                                                                                                                                                                                                                                                                                                                                                                                                                                                                                                                                                                                                          |               | 3.61E-04     | 0.03394541            | 0.7943103      | 1.21     | -1.24    | -1.29        | -1.94       | <i>Hykk</i>               | hydroxylysine kinase 1                                                     | 0000070 // mitotic sister chromatid segregation // not recorded//0000086 // G2/M transition of mitotic cell cycle                                                                                                                                                                                                                                                                                                  |
| NM_145434                                                                                                                                                                                                                                                                                                                                                                                                                                                                                                                                                                                                                                                                                                                                                                                                                                                                                                                                                                                                                                                                                                                                                                                                                                                                                                                                                                                                                                                                                                                                                                                                                                                                                                                                                                                                                                                                                                                                                                                                                                                                                                                                                                                                                                                                                                                                                                                                                                                                                                                                                                                                                                                                                                                                                                                                                                                                                                                                                                                                                                                                                                                                                                                                                                                                                                                                                                                                                                                                                                                                                                                                                                                                                                                                                                                                                                                                                                                                                                                                                                                                                                                                                                                                                                                                                                                                                                                                                                                                                                                                                                                                                                                                                                                                                                                                                                                                                                                                                                                                                                                                                                                                                                                                                                                                                                                                                                                                                                                                                                                                                                                                                                                                                                                                                                                                                                                                                                                                                                                                                                                                                                                                                                                                                                                                                                                                                                                                                                                                                                                                                                                                                                                                                                                                                                                                                                                                                                                                                                                                                                                                                                                                                          |               | 0.14153165   | 0.012387881           | 0.001671302    | 1.20     | -2.64    | -1.14        | -1.94       | <i>Nfk1a1</i>             | nuclear receptor subfamily 1, group D, member 1                            | 0001568 // blood vessel development // inferred from mutant phenotype//0003158 // endothelium development                                                                                                                                                                                                                                                                                                          |
| NM_009328                                                                                                                                                                                                                                                                                                                                                                                                                                                                                                                                                                                                                                                                                                                                                                                                                                                                                                                                                                                                                                                                                                                                                                                                                                                                                                                                                                                                                                                                                                                                                                                                                                                                                                                                                                                                                                                                                                                                                                                                                                                                                                                                                                                                                                                                                                                                                                                                                                                                                                                                                                                                                                                                                                                                                                                                                                                                                                                                                                                                                                                                                                                                                                                                                                                                                                                                                                                                                                                                                                                                                                                                                                                                                                                                                                                                                                                                                                                                                                                                                                                                                                                                                                                                                                                                                                                                                                                                                                                                                                                                                                                                                                                                                                                                                                                                                                                                                                                                                                                                                                                                                                                                                                                                                                                                                                                                                                                                                                                                                                                                                                                                                                                                                                                                                                                                                                                                                                                                                                                                                                                                                                                                                                                                                                                                                                                                                                                                                                                                                                                                                                                                                                                                                                                                                                                                                                                                                                                                                                                                                                                                                                                                                          |               | 0.102943716  | 0.006373226           | 0.001945413    | 2.53     | 1.11     | 1.20         | -1.90       | <i>C22</i>                | cyclin A2                                                                  | 0000086 // G2/M transition of mitotic cell cycle // not recorded//0001212 // negative regulation of transcription                                                                                                                                                                                                                                                                                                  |
| NM_008021//NM_1                                                                                                                                                                                                                                                                                                                                                                                                                                                                                                                                                                                                                                                                                                                                                                                                                                                                                                                                                                                                                                                                                                                                                                                                                                                                                                                                                                                                                                                                                                                                                                                                                                                                                                                                                                                                                                                                                                                                                                                                                                                                                                                                                                                                                                                                                                                                                                                                                                                                                                                                                                                                                                                                                                                                                                                                                                                                                                                                                                                                                                                                                                                                                                                                                                                                                                                                                                                                                                                                                                                                                                                                                                                                                                                                                                                                                                                                                                                                                                                                                                                                                                                                                                                                                                                                                                                                                                                                                                                                                                                                                                                                                                                                                                                                                                                                                                                                                                                                                                                                                                                                                                                                                                                                                                                                                                                                                                                                                                                                                                                                                                                                                                                                                                                                                                                                                                                                                                                                                                                                                                                                                                                                                                                                                                                                                                                                                                                                                                                                                                                                                                                                                                                                                                                                                                                                                                                                                                                                                                                                                                                                                                                                                    |               | 0.08395548   | 0.013229165           | 0.04609279     | 1.93     | -1.15    | 1.20         | -1.86       | <i>Foxm1</i>              | forkhead box M1                                                            | 0002376 // immune system process // inferred from electronic annotation//0006897 // endocytosis // inferred fr 0000226 // microtubule cytoskeleton organization // inferred from electronic annotation//0000910 // cytokinesis                                                                                                                                                                                     |
| NM_010766                                                                                                                                                                                                                                                                                                                                                                                                                                                                                                                                                                                                                                                                                                                                                                                                                                                                                                                                                                                                                                                                                                                                                                                                                                                                                                                                                                                                                                                                                                                                                                                                                                                                                                                                                                                                                                                                                                                                                                                                                                                                                                                                                                                                                                                                                                                                                                                                                                                                                                                                                                                                                                                                                                                                                                                                                                                                                                                                                                                                                                                                                                                                                                                                                                                                                                                                                                                                                                                                                                                                                                                                                                                                                                                                                                                                                                                                                                                                                                                                                                                                                                                                                                                                                                                                                                                                                                                                                                                                                                                                                                                                                                                                                                                                                                                                                                                                                                                                                                                                                                                                                                                                                                                                                                                                                                                                                                                                                                                                                                                                                                                                                                                                                                                                                                                                                                                                                                                                                                                                                                                                                                                                                                                                                                                                                                                                                                                                                                                                                                                                                                                                                                                                                                                                                                                                                                                                                                                                                                                                                                                                                                                                                          |               |              |                       |                | 2.15     | 2.98     | -2.58        | -1.86       | <i>Marco</i>              | macrophage receptor with collagenase structure                             | 0001817 // activation of MAPK activity // not recorded//0001696 // gastric acid secretion // not recorded//0001 0010951 // negative regulation of endopeptidase activity // inferred from electronic annotation                                                                                                                                                                                                    |
| NM_00128599//NM_1                                                                                                                                                                                                                                                                                                                                                                                                                                                                                                                                                                                                                                                                                                                                                                                                                                                                                                                                                                                                                                                                                                                                                                                                                                                                                                                                                                                                                                                                                                                                                                                                                                                                                                                                                                                                                                                                                                                                                                                                                                                                                                                                                                                                                                                                                                                                                                                                                                                                                                                                                                                                                                                                                                                                                                                                                                                                                                                                                                                                                                                                                                                                                                                                                                                                                                                                                                                                                                                                                                                                                                                                                                                                                                                                                                                                                                                                                                                                                                                                                                                                                                                                                                                                                                                                                                                                                                                                                                                                                                                                                                                                                                                                                                                                                                                                                                                                                                                                                                                                                                                                                                                                                                                                                                                                                                                                                                                                                                                                                                                                                                                                                                                                                                                                                                                                                                                                                                                                                                                                                                                                                                                                                                                                                                                                                                                                                                                                                                                                                                                                                                                                                                                                                                                                                                                                                                                                                                                                                                                                                                                                                                                                                  |               | 0.11426556   | 0.011221865           | 0.005312019    | 2.29     | 1.02     | 1.21         | -1.85       | <i>Prc1</i>               | protein regulator of cytokinesis 1                                         | 0001913 // T cell mediated cytotoxicity // --//0002839 // positive regulation of immune response to tumor cell //                                                                                                                                                                                                                                                                                                  |
| NM_00128640//NM_1                                                                                                                                                                                                                                                                                                                                                                                                                                                                                                                                                                                                                                                                                                                                                                                                                                                                                                                                                                                                                                                                                                                                                                                                                                                                                                                                                                                                                                                                                                                                                                                                                                                                                                                                                                                                                                                                                                                                                                                                                                                                                                                                                                                                                                                                                                                                                                                                                                                                                                                                                                                                                                                                                                                                                                                                                                                                                                                                                                                                                                                                                                                                                                                                                                                                                                                                                                                                                                                                                                                                                                                                                                                                                                                                                                                                                                                                                                                                                                                                                                                                                                                                                                                                                                                                                                                                                                                                                                                                                                                                                                                                                                                                                                                                                                                                                                                                                                                                                                                                                                                                                                                                                                                                                                                                                                                                                                                                                                                                                                                                                                                                                                                                                                                                                                                                                                                                                                                                                                                                                                                                                                                                                                                                                                                                                                                                                                                                                                                                                                                                                                                                                                                                                                                                                                                                                                                                                                                                                                                                                                                                                                                                                  |               | 0.01847303   | 0.028604146           | 0.014477238    | 1.79     | 1.02     | 1.03         | -1.81       | <i>Ghr1</i>               | ghrelin                                                                    | 0000070 // mitotic sister chromatid segregation // not recorded//0000086 // G2/M transition of mitotic cell cycle                                                                                                                                                                                                                                                                                                  |
| NM_001243008//NM_001243009//NM_009935                                                                                                                                                                                                                                                                                                                                                                                                                                                                                                                                                                                                                                                                                                                                                                                                                                                                                                                                                                                                                                                                                                                                                                                                                                                                                                                                                                                                                                                                                                                                                                                                                                                                                                                                                                                                                                                                                                                                                                                                                                                                                                                                                                                                                                                                                                                                                                                                                                                                                                                                                                                                                                                                                                                                                                                                                                                                                                                                                                                                                                                                                                                                                                                                                                                                                                                                                                                                                                                                                                                                                                                                                                                                                                                                                                                                                                                                                                                                                                                                                                                                                                                                                                                                                                                                                                                                                                                                                                                                                                                                                                                                                                                                                                                                                                                                                                                                                                                                                                                                                                                                                                                                                                                                                                                                                                                                                                                                                                                                                                                                                                                                                                                                                                                                                                                                                                                                                                                                                                                                                                                                                                                                                                                                                                                                                                                                                                                                                                                                                                                                                                                                                                                                                                                                                                                                                                                                                                                                                                                                                                                                                                                              |               |              |                       |                | -1.21    | -1.48    | -1.48        | -1.81       | <i>Col6a3</i>             | collagen, type VI, alpha 3                                                 | 0001549 // osteoblast differentiation // not recorded//0007155 // cell adhesion // inferred from electronic annot 0000086 // G2/M transition of mitotic cell cycle // not recorded//0001212 // negative regulation of transcription                                                                                                                                                                                |
| NM_010400                                                                                                                                                                                                                                                                                                                                                                                                                                                                                                                                                                                                                                                                                                                                                                                                                                                                                                                                                                                                                                                                                                                                                                                                                                                                                                                                                                                                                                                                                                                                                                                                                                                                                                                                                                                                                                                                                                                                                                                                                                                                                                                                                                                                                                                                                                                                                                                                                                                                                                                                                                                                                                                                                                                                                                                                                                                                                                                                                                                                                                                                                                                                                                                                                                                                                                                                                                                                                                                                                                                                                                                                                                                                                                                                                                                                                                                                                                                                                                                                                                                                                                                                                                                                                                                                                                                                                                                                                                                                                                                                                                                                                                                                                                                                                                                                                                                                                                                                                                                                                                                                                                                                                                                                                                                                                                                                                                                                                                                                                                                                                                                                                                                                                                                                                                                                                                                                                                                                                                                                                                                                                                                                                                                                                                                                                                                                                                                                                                                                                                                                                                                                                                                                                                                                                                                                                                                                                                                                                                                                                                                                                                                                                          |               |              |                       |                | 1.51     | 1.03     | -1.23        | -1.80       | <i>H60a</i>               | histocompatibility 60a                                                     | 0001568 // blood vessel development // inferred from mutant phenotype//0003158 // endothelium development 0007049 // cell cycle // inferred from electronic annotation//0007059 // chromosome segregation // not recorded                                                                                                                                                                                          |
| NM_011121                                                                                                                                                                                                                                                                                                                                                                                                                                                                                                                                                                                                                                                                                                                                                                                                                                                                                                                                                                                                                                                                                                                                                                                                                                                                                                                                                                                                                                                                                                                                                                                                                                                                                                                                                                                                                                                                                                                                                                                                                                                                                                                                                                                                                                                                                                                                                                                                                                                                                                                                                                                                                                                                                                                                                                                                                                                                                                                                                                                                                                                                                                                                                                                                                                                                                                                                                                                                                                                                                                                                                                                                                                                                                                                                                                                                                                                                                                                                                                                                                                                                                                                                                                                                                                                                                                                                                                                                                                                                                                                                                                                                                                                                                                                                                                                                                                                                                                                                                                                                                                                                                                                                                                                                                                                                                                                                                                                                                                                                                                                                                                                                                                                                                                                                                                                                                                                                                                                                                                                                                                                                                                                                                                                                                                                                                                                                                                                                                                                                                                                                                                                                                                                                                                                                                                                                                                                                                                                                                                                                                                                                                                                                                          |               | 0.2916006    | 0.021945084           | 0.010812664    | 2.06     | 1.01     | 1.13         | -1.80       | <i>PK1</i>                | polo-like kinase 1                                                         | 0000070 // mitotic sister chromatid segregation // not recorded//0000086 // G2/M transition of mitotic cell cycle                                                                                                                                                                                                                                                                                                  |
| NM_011607//NM_00653774//NM_00653775//NM_00653776//NM_00653777//NM_00653778//NM_00653779//NM_00653780//NM_00653781//NM_00653782//NM_00653783//NM_00653784//NM_00653785//NM_00653786//NM_00653787//NM_00653788//NM_00653789//NM_00653790//NM_00653791//NM_00653792//NM_00653793//NM_00653794//NM_00653795//NM_00653796//NM_00653797//NM_00653798//NM_00653799//NM_00653800//NM_00653801//NM_00653802//NM_00653803//NM_00653804//NM_00653805//NM_00653806//NM_00653807//NM_00653808//NM_00653809//NM_00653810//NM_00653811//NM_00653812//NM_00653813//NM_00653814//NM_00653815//NM_00653816//NM_00653817//NM_00653818//NM_00653819//NM_00653820//NM_00653821//NM_00653822//NM_00653823//NM_00653824//NM_00653825//NM_00653826//NM_00653827//NM_00653828//NM_00653829//NM_00653830//NM_00653831//NM_00653832//NM_00653833//NM_00653834//NM_00653835//NM_00653836//NM_00653837//NM_00653838//NM_00653839//NM_00653840//NM_00653841//NM_00653842//NM_00653843//NM_00653844//NM_00653845//NM_00653846//NM_00653847//NM_00653848//NM_00653849//NM_00653850//NM_00653851//NM_00653852//NM_00653853//NM_00653854//NM_00653855//NM_00653856//NM_00653857//NM_00653858//NM_00653859//NM_00653860//NM_00653861//NM_00653862//NM_00653863//NM_00653864//NM_00653865//NM_00653866//NM_00653867//NM_00653868//NM_00653869//NM_00653870//NM_00653871//NM_00653872//NM_00653873//NM_00653874//NM_00653875//NM_00653876//NM_00653877//NM_00653878//NM_00653879//NM_00653880//NM_00653881//NM_00653882//NM_00653883//NM_00653884//NM_00653885//NM_00653886//NM_00653887//NM_00653888//NM_00653889//NM_00653890//NM_00653891//NM_00653892//NM_00653893//NM_00653894//NM_00653895//NM_00653896//NM_00653897//NM_00653898//NM_00653899//NM_00653900//NM_00653901//NM_00653902//NM_00653903//NM_00653904//NM_00653905//NM_00653906//NM_00653907//NM_00653908//NM_00653909//NM_00653910//NM_00653911//NM_00653912//NM_00653913//NM_00653914//NM_00653915//NM_00653916//NM_00653917//NM_00653918//NM_00653919//NM_00653920//NM_00653921//NM_00653922//NM_00653923//NM_00653924//NM_00653925//NM_00653926//NM_00653927//NM_00653928//NM_00653929//NM_00653930//NM_00653931//NM_00653932//NM_00653933//NM_00653934//NM_00653935//NM_00653936//NM_00653937//NM_00653938//NM_00653939//NM_00653940//NM_00653941//NM_00653942//NM_00653943//NM_00653944//NM_00653945//NM_00653946//NM_00653947//NM_00653948//NM_00653949//NM_00653950//NM_00653951//NM_00653952//NM_00653953//NM_00653954//NM_00653955//NM_00653956//NM_00653957//NM_00653958//NM_00653959//NM_00653960//NM_00653961//NM_00653962//NM_00653963//NM_00653964//NM_00653965//NM_00653966//NM_00653967//NM_00653968//NM_00653969//NM_00653970//NM_00653971//NM_00653972//NM_00653973//NM_00653974//NM_00653975//NM_00653976//NM_00653977//NM_00653978//NM_00653979//NM_00653980//NM_00653981//NM_00653982//NM_00653983//NM_00653984//NM_00653985//NM_00653986//NM_00653987//NM_00653988//NM_00653989//NM_00653990//NM_00653991//NM_00653992//NM_00653993//NM_00653994//NM_00653995//NM_00653996//NM_00653997//NM_00653998//NM_00653999//NM_00654000//NM_00654001//NM_00654002//NM_00654003//NM_00654004//NM_00654005//NM_00654006//NM_00654007//NM_00654008//NM_00654009//NM_00654010//NM_00654011//NM_00654012//NM_00654013//NM_00654014//NM_00654015//NM_00654016//NM_00654017//NM_00654018//NM_00654019//NM_00654020//NM_00654021//NM_00654022//NM_00654023//NM_00654024//NM_00654025//NM_00654026//NM_00654027//NM_00654028//NM_00654029//NM_00654030//NM_00654031//NM_00654032//NM_00654033//NM_00654034//NM_00654035//NM_00654036//NM_00654037//NM_00654038//NM_00654039//NM_00654040//NM_00654041//NM_00654042//NM_00654043//NM_00654044//NM_00654045//NM_00654046//NM_00654047//NM_00654048//NM_00654049//NM_00654050//NM_00654051//NM_00654052//NM_00654053//NM_00654054//NM_00654055//NM_00654056//NM_00654057//NM_00654058//NM_00654059//NM_00654060//NM_00654061//NM_00654062//NM_00654063//NM_00654064//NM_00654065//NM_00654066//NM_00654067//NM_00654068//NM_00654069//NM_00654070//NM_00654071//NM_00654072//NM_00654073//NM_00654074//NM_00654075//NM_00654076//NM_00654077//NM_00654078//NM_00654079//NM_00654080//NM_00654081//NM_00654082//NM_00654083//NM_00654084//NM_00654085//NM_00654086//NM_00654087//NM_00654088//NM_00654089//NM_00654090//NM_00654091//NM_00654092//NM_00654093//NM_00654094//NM_00654095//NM_00654096//NM_00654097//NM_00654098//NM_00654099//NM_00654100//NM_00654101//NM_00654102//NM_00654103//NM_00654104//NM_00654105//NM_00654106//NM_00654107//NM_00654108//NM_00654109//NM_00654110//NM_00654111//NM_00654112//NM_00654113//NM_00654114//NM_00654115//NM_00654116//NM_00654117//NM_00654118//NM_00654119//NM_00654120//NM_00654121//NM_00654122//NM_00654123//NM_00654124//NM_00654125//NM_00654126//NM_00654127//NM_00654128//NM_00654129//NM_00654130//NM_00654131//NM_00654132//NM_00654133//NM_00654134//NM_00654135//NM_00654136//NM_00654137//NM_00654138//NM_00654139//NM_00654140//NM_00654141//NM_00654142//NM_00654143//NM_00654144//NM_00654145//NM_00654146//NM_00654147//NM_00654148//NM_00654149//NM_00654150//NM_00654151//NM_00654152//NM_00654153//NM_00654154//NM_00654155//NM_00654156//NM_00654157//NM_00654158//NM_00654159//NM_00654160//NM_00654161//NM_00654162//NM_00654163//NM_00654164//NM_00654165//NM_00654166//NM_00654167//NM_00654168//NM_00654169//NM_00654170//NM_00654171//NM_00654172//NM_00654173//NM_00654174//NM_00654175//NM_00654176//NM_00654177//NM_00654178//NM_00654179//NM_00654180//NM_00654181//NM_00654182//NM_00654183//NM_00654184//NM_00654185//NM_00654186//NM_00654187//NM_00654188//NM_00654189//NM_00654190//NM_00654191//NM_00654192//NM_00654193//NM_00654194//NM_00654195//NM_00654196//NM_00654197//NM_00654198//NM_00654199//NM_00654200//NM_00654201//NM_00654202//NM_00654203//NM_00654204//NM_00654205//NM_00654206//NM_00654207//NM_00654208//NM_00654209//NM_00654210//NM_00654211//NM_00654212//NM_00654213//NM_00654214//NM_00654215//NM_00654216//NM_00654217//NM_00654218//NM_00654219//NM_00654220//NM_00654221//NM_00654222//NM_00654223//NM_00654224//NM_00654225//NM_00654226//NM_00654227//NM_00654228//NM_00654229//NM_00654230//NM_00654231//NM_00654232//NM_00654233//NM_00654234//NM_00654235//NM_00654236//NM_00654237//NM_00654238//NM_00654239//NM_00654240//NM_00654241//NM_00654242//NM_00654243//NM_00654244//NM_00654245//NM_00654246//NM_00654247//NM_00654248//NM_00654249//NM_00654250//NM_00654251//NM_00654252//NM_00654253//NM_00654254//NM_00654255//NM_00654256//NM_00654257//NM_00654258//NM_00654259//NM_00654260//NM_00654261//NM_00654262//NM_00654263//NM_00654264//NM_00654265//NM_00654266//NM_00654267//NM_00654268//NM_00654269//NM_00654270//NM_00654271//NM_00654272//NM_00654273//NM_00654274//NM_00654275//NM_00654276//NM_00654277//NM_00654278//NM_00654279//NM_00654280//NM_00654281//NM_00654282//NM_00654283//NM_00654284//NM_00654285//NM_00654286//NM_00654287//NM_00654288//NM_00654289//NM_00654290//NM_00654291//NM_00654292//NM_00654293//NM_00654294//NM_00654295//NM_00654296//NM_00654297//NM_00654298//NM_00654299//NM_00654300//NM_00654301//NM_0065 |               |              |                       |                |          |          |              |             |                           |                                                                            |                                                                                                                                                                                                                                                                                                                                                                                                                    |

| RefSeq       | Transcript ID  | p (Genotype) | : p (Genotype-Exposure) | Z           | p (Exposure) | FC WT:KO | FC KO Air:O3  | FC Air:WT:KO                                            | FC O3:WT:KO                                                                                                          | Gene Symbol                                                                                                          | Gene Title                                                                                                                   | Gene Ontology Biological Process |
|--------------|----------------|--------------|-------------------------|-------------|--------------|----------|---------------|---------------------------------------------------------|----------------------------------------------------------------------------------------------------------------------|----------------------------------------------------------------------------------------------------------------------|------------------------------------------------------------------------------------------------------------------------------|----------------------------------|
| NM_010225    |                | 0.007460019  | 0.014400821             | 0.22995287  | 1.10         | -1.21    | -1.10         | -1.46                                                   | <b>Foxf2</b>                                                                                                         | forkhead box F2                                                                                                      | 0006351 // transcription, DNA-templated // inferred from electronic annotation // 0006355 // regulation of trans             |                                  |
| NM_009610    |                | 0.404168     | 0.009947431             | 0.023610901 | 1.10         | -2.31    | 1.75          | -1.46                                                   | <b>Actg2</b>                                                                                                         | actin, gamma 2, smooth muscle, enteric                                                                               | 0010628 // positive regulation of gene expression // inferred from sequence or structural similarity // 0090131 // r         |                                  |
| NM_001159564 | NM_0213599     | 0.006498808  | 0.006498809             | 0.006498809 | 1.64         | 1.64     | -1.45         | -1.45                                                   | <b>Irgb6</b>                                                                                                         | cytokine beta 6                                                                                                      | 0006954 // inflammatory response // inferred from mutant phenotype // 0007155 // cell adhesion // inferred from              |                                  |
| NM_001004140 | NR_03142748    | 0.039913804  | 0.09432041              | 1.53        | -1.13        | -1.19    | -1.45         | <b>Cxcp2</b>                                            | integrin beta associated protein 2                                                                                   | 0000284 // mitotic cytokinesis // not recorded // 0006915 // apoptotic process // inferred from electronic annota    |                                                                                                                              |                                  |
| NM_001083917 | NR_001286648   | 0.153521     | 0.178227                | 0.00650     | -1.86        | -1.58    | -1.71         | -1.45                                                   | <b>Kcnzb1</b>                                                                                                        | sodium channel, voltage-gated, type II, beta                                                                         | 0008310 // transport // inferred from electronic annotation // 0006811 // ion transport // inferred from electronic          |                                  |
| NM_133774    | NR_00625694    | 0.011246851  | 1.29                    | 1.14        | -1.28        | -1.45    | <b>Star4d</b> | STAR-related lipid transfer (START) domain containing 4 | 0006810 // transport // inferred from electronic annotation // 0006869 // lipid transport // inferred from electroni |                                                                                                                      |                                                                                                                              |                                  |
| NM_001025779 | NR_08211958    | 0.034671698  | 1.82E-04                | 4.13        | 1.73         | 1.65     | -1.45         | <b>Cdc6</b>                                             | cell division cycle 6                                                                                                | 0006260 // DNA replication // inferred from electronic annotation // 0006270 // DNA replication initiation // infer  |                                                                                                                              |                                  |
| NM_001308327 | NR_001308329   | 0.0088113    | 0.006512597             | 0.006512597 | 1.41         | 1.15     | -1.18         | -1.45                                                   | <b>Enpp1</b>                                                                                                         | ectonucleotide pyrophosphatase/phosphodiesterase 1                                                                   | 0006091 // generation of precursor metabolites and energy // inferred from mutant phenotype // 0006796 // phosphate-containi |                                  |
| NM_008842    | NR_009017425   | 0.03932411   | 0.004323326             | 1.09        | 1.54         | 1.02     | -1.45         | <b>Pim1</b>                                             | provinil integration site 1                                                                                          | 0006488 // protein phosphorylation // not recorded // 0007346 // regulation of mitotic cell cycle // not recorded // |                                                                                                                              |                                  |
| NM_134117    | NR_011246234   | 0.008962023  | 0.03866082              | 0.03866082  | -1.44        | -1.06    | 1.07          | -1.45                                                   | <b>Pknox</b>                                                                                                         | protein kinase domain containing, cytoplasmic                                                                        | 0001501 // skeletal system development // inferred from mutant phenotype // 0001503 // ossification // inferred f            |                                  |
| NM_178911    | NR_011243975   | 0.006525353  | 0.006525353             | 0.006525353 | -1.25        | -1.11    | 1.29          | -1.45                                                   | <b>Plid4</b>                                                                                                         | phospholipase D family, member 4                                                                                     | 0002244 // hematopoietic progenitor cell differentiation // inferred from mutant phenotype // 0006629 // lipid me            |                                  |
| NM_001033308 | NR_011250230   | 0.00252347   | 0.4994762               | 0.4994762   | -1.60        | -1.38    | 1.26          | -1.46                                                   | <b>Themis2</b>                                                                                                       | thymocyte selection associated family member 2                                                                       | 0002376 // immune system process // inferred from electronic annotation // 0006954 // inflammatory response //               |                                  |
| NM_022358    | NR_022718892   | 0.00252347   | 0.4994762               | 0.4994762   | 1.21         | 1.73     | 1.02          | -1.46                                                   | <b>Zfp36</b>                                                                                                         | zinc finger protein 36                                                                                               | 0001122 // negative regulation of transcription from RNA polymerase II promoter // inferred from mutant phenot               |                                  |
| NM_029084    | NR_022718892   | 0.00252347   | 0.4994762               | 0.4994762   | -1.32        | 1.30     | -1.18         | -1.46                                                   | <b>Slmfb</b>                                                                                                         | SLAMF family member 8                                                                                                | 0003860 // regulation of NAD(P)H oxidase activity // inferred from mutant phenotype // 00035690 // cellular resp             |                                  |
| NM_023738    | NR_022718892   | 0.00252347   | 0.4994762               | 0.4994762   | -1.28        | -1.03    | -1.18         | -1.47                                                   | <b>Uba7</b>                                                                                                          | ubiquitin-like modifier activating enzyme 7                                                                          | 0006464 // cellular protein modification process // not recorded // 0006974 // cellular response to DNA damage st            |                                  |
| NM_001278269 | NR_0118151     | 0.006519982  | 0.006519983             | 0.006519983 | -1.35        | -1.31    | 1.43          | -1.48                                                   | <b>Fyb</b>                                                                                                           | FYB binding protein                                                                                                  | 0006955 // immune response // inferred from electronic annotation // 0004576 // mast cell activation // inferred f           |                                  |
| NM_001289755 | NR_040118688   | 0.026309016  | 0.6852822               | 0.6852822   | -2.03        | 1.56     | -2.13         | -1.48                                                   | <b>ApoC3</b>                                                                                                         | apolipoprotein C-III                                                                                                 | 0006629 // lipid metabolic process // inferred from electronic annotation // 0006641 // triglyceride metabolic pro           |                                  |
| NM_134133    | NR_000701278   | 0.025884103  | 0.71766454              | 0.71766454  | -1.21        | 1.26     | -1.03         | -1.48                                                   | <b>Slim3</b>                                                                                                         | small integral membrane protein 3                                                                                    | 0002412 // antigen transcytosis by M cells in mucosal-associated lymphoid tissue // inferred from direct assay // 0          |                                  |
| NM_025989    | NR_008962023   | 0.03866082   | 0.03866082              | 0.03866082  | -1.06        | -7.17    | 10.02         | -1.48                                                   | <b>Gp2</b>                                                                                                           | glycoprotein 2 (zymogen granule membrane)                                                                            | 0002376 // immune system process // inferred from electronic annotation // 0006954 // inflammatory response //               |                                  |
| NM_009780    | NR_006523531   | 0.006525353  | 0.006525353             | 0.006525353 | -1.23        | -1.16    | 1.40          | -1.48                                                   | <b>Ccb2</b>                                                                                                          | complement component 4B (Chido blood group) // complement C4-B                                                       | 0001773 // myeloid dendritic cell activation // not recorded // 0002218 // activation of innate immune response //           |                                  |
| NM_020984    | NR_022718892   | 0.00252347   | 0.4994762               | 0.4994762   | -1.43        | -1.05    | -1.49         | -1.49                                                   | <b>Pycard</b>                                                                                                        | PKD and CARD domain containing                                                                                       | 0001502 // cartilage condensation // inferred from electronic annotation // 00060348 // bone development // infer            |                                  |
| NM_020769    | NR_022718892   | 0.00252347   | 0.4994762               | 0.4994762   | -1.98        | -2.24    | 1.70          | -1.50                                                   | <b>Chad</b>                                                                                                          | chondroatherin                                                                                                       | 0006801 // superoxide metabolic process // not recorded // 0006979 // response to oxidative stress // inferred fr            |                                  |
| NM_008706    | NR_017970597   | 0.04884449   | 0.08275565              | 0.08275565  | -1.07        | 1.36     | 1.03          | -1.50                                                   | <b>Nqo1</b>                                                                                                          | NAD(P)H dehydrogenase, quinone 1                                                                                     | 0002690 // positive regulation of leukocyte chemotaxis // not recorded // 0006508 // proteolysis // inferred fr              |                                  |
| NM_010172    | NR_006510132   | 0.011242445  | 0.011242445             | 0.011242445 | 1.89         | 1.35     | 2.10          | -1.50                                                   | <b>F7</b>                                                                                                            | coagulation factor VII                                                                                               | 0006508 // proteolysis // inferred from electronic annotation // 0006898 // receptor-mediated endocytosis // infe            |                                  |
| NM_001013373 | NR_006510132   | 0.011242445  | 0.011242445             | 0.011242445 | -1.66        | -1.49    | 1.34          | -1.50                                                   | <b>Trmpss13</b>                                                                                                      | transmembrane protein, serine 13                                                                                     | 0002376 // immune system process // inferred from electronic annotation // 0002819 // regulation of adaptive im              |                                  |
| NM_001159393 | NR_020029576   | 0.032851394  | 0.090463966             | 0.090463966 | -1.04        | 1.49     | -1.03         | -1.50                                                   | <b>Irf1</b>                                                                                                          | interferon regulatory factor 1                                                                                       | 0002376 // immune system process // inferred from electronic annotation // 0002819 // regulation of adaptive im              |                                  |
| NM_001029841 | NR_0091912     | 0.006520668  | 0.011245530             | 0.011245530 | 1.15         | 1.51     | 1.15          | -1.50                                                   | <b>Sia</b>                                                                                                           | src-like adaptor                                                                                                     | 0007155 // cell adhesion // inferred from electronic annotation // 0019221 // cytokine-mediated signaling pathwa             |                                  |
| NM_001252651 | NR_913E-04     | 0.018762708  | 0.020152634             | 0.020152634 | -1.39        | 1.00     | 1.09          | -1.51                                                   | <b>Csf3r</b>                                                                                                         | colony stimulating factor 3 receptor (granulocyte)                                                                   | 0001875 // activation of MAPK activity // not recorded // 0001570 // vasculogenesis // inferred from mutant phen             |                                  |
| NM_0011562   | NR_011242957   | 0.01662339   | 0.11330092              | 0.11330092  | 1.15         | 1.60     | 1.08          | -1.51                                                   | <b>Tgfb1</b>                                                                                                         | transforming growth factor beta 1                                                                                    | 0001502 // cartilage condensation // inferred from electronic annotation // 00060348 // bone development // infer            |                                  |
| NM_001164708 | NR_011390411   | 0.01662339   | 0.11330092              | 0.11330092  | -1.52        | 1.21     | -1.22         | -1.51                                                   | <b>Hspb2</b>                                                                                                         | heat shock protein 2                                                                                                 | 0006801 // superoxide metabolic process // not recorded // 0006979 // response to oxidative stress // inferred fr            |                                  |
| NM_020557    | NR_381188      | 0.006507471  | 0.01167828              | 0.01167828  | -1.39        | -1.16    | 1.27          | -1.53                                                   | <b>Cmpk2</b>                                                                                                         | cytidine monophosphate (UMP-CMP) kinase 2, mitochondrial                                                             | 0006801 // superoxide metabolic process // not recorded // 0006979 // response to oxidative stress // inferred fr            |                                  |
| NM_009099    | NR_006507471   | 0.01167828   | 0.01167828              | 0.01167828  | -1.58        | -1.24    | 1.21          | -1.53                                                   | <b>Trim30a</b>                                                                                                       | tripartite motif-containing 30A // tripartite motif-containing 30D                                                   | 0006351 // transcription, DNA-templated // inferred from electronic annotation // 0006355 // regulation of transc            |                                  |
| NM_001081029 | NR_868243      | 0.00654631   | 0.00654632              | 0.00654632  | 1.86         | 1.91     | 1.50          | -1.54                                                   | <b>Tmem243</b>                                                                                                       | transmembrane protein 243, mitochondrial                                                                             | 0006351 // transcription, DNA-templated // inferred from electronic annotation // 0006355 // regulation of transc            |                                  |
| NM_029495    | NR_178825      | 0.011244910  | 0.011244910             | 0.011244910 | -1.19        | -1.24    | 1.60          | -1.55                                                   | <b>Eps11</b>                                                                                                         | epithelial stromal interaction 1 (breast)                                                                            | 0006898 // receptor-mediated endocytosis // inferred from sequence or structural similarity // 0006898 // recept             |                                  |
| NM_011150    | NR_109E-05     | 0.020499367  | 0.02188839              | 0.02188839  | -1.01        | -1.31    | 2.06          | -1.55                                                   | <b>Lgals3bp</b>                                                                                                      | lectin, galactoside-binding, soluble, 3 binding protein                                                              | 0006351 // transcription, DNA-templated // inferred from electronic annotation // 0006355 // regulation of transc            |                                  |
| NM_001164289 | NR_001164323   | 0.006518862  | 0.006518862             | 0.006518862 | -1.26        | -1.21    | 1.49          | -1.55                                                   | <b>Pph1d</b>                                                                                                         | PHD finger protein 11C // PHD finger protein 11D                                                                     | 0006898 // receptor-mediated endocytosis // inferred from sequence or structural similarity // 0006898 // recept             |                                  |
| NM_001164625 | NR_011242957   | 0.01662339   | 0.11330092              | 0.11330092  | -1.57        | -1.29    | 1.28          | -1.56                                                   | <b>Tatd1</b>                                                                                                         | thiosulfate sulfurtransferase (rhodanese)-like domain containing 1                                                   | 0006898 // receptor-mediated endocytosis // inferred from sequence or structural similarity // 0006898 // recept             |                                  |
| NM_001159738 | NR_016960      | 0.006496447  | 0.006496448             | 0.006496448 | 1.45         | 1.16     | -1.16         | -1.56                                                   | <b>Cd200</b>                                                                                                         | chemokine (C-C motif) ligand 20                                                                                      | 0002376 // immune system process // inferred from electronic annotation // 0006508 // proteolysis // inferred fr             |                                  |
| NM_007686    | NR_0082811646  | 0.046391945  | 0.3154507               | 0.3154507   | -1.19        | 1.35     | -1.02         | -1.56                                                   | <b>Cj</b>                                                                                                            | complement component factor Cj                                                                                       | 0008152 // metabolic process // inferred from electronic annotation                                                          |                                  |
| NM_026601    | NR_C_068584606 | 0.040043514  | 0.5474951               | 0.5474951   | -1.20        | 1.46     | -1.12         | -1.57                                                   | <b>Hyl</b>                                                                                                           | hydroxypruvate isomerase homolog (E. coli)                                                                           | 0008152 // metabolic process // inferred from electronic annotation                                                          |                                  |
| NM_001040005 | NR_006534631   | 0.006534632  | 0.006534632             | 0.006534632 | -1.23        | -1.15    | 1.47          | -1.57                                                   | <b>Rnf213</b>                                                                                                        | ring finger protein 213                                                                                              | 0008152 // metabolic process // inferred from electronic annotation // 0016567 // protein ubiquitination // not r            |                                  |
| NM_001160711 | NR_536E-05     | 0.010786352  | 0.061238483             | 0.061238483 | -1.30        | 1.00     | 1.21          | -1.57                                                   | <b>Cd300g</b>                                                                                                        | CD300 antigen like family member G                                                                                   | 0002376 // immune system process // inferred from electronic annotation // 0002414 // immunoglobulin transcyt                |                                  |
| NM_016780    | NR_006532312   | 0.011248766  | 0.011248766             | 0.011248766 | -1.44        | -1.18    | 1.29          | -1.58                                                   | <b>Irgb3</b>                                                                                                         | integrin beta 3                                                                                                      | 0001938 // positive regulation of endothelial cell proliferation // not recorded // 0001954 // positive regulation of        |                                  |
| NM_007421    | NR_0181965     | 0.033065483  | 0.001208518             | 0.001208518 | 1.22         | 2.02     | -1.05         | -1.58                                                   | <b>Adsl1</b>                                                                                                         | adenylosuccinate synthetase like 1                                                                                   | 0006613 // purine nucleotide metabolic process // inferred from direct assay // 0006164 // purine nucleotide bios            |                                  |
| NM_013640    | NR_0004284681  | 0.001395478  | 0.06894126              | 0.06894126  | -1.23        | 1.44     | -1.12         | -1.58                                                   | <b>Psmo10</b>                                                                                                        | proteasome (synthetase, macropain) subunit, beta type 10                                                             | 0000902 // cell morphogenesis // inferred from mutant phenotype // 0006508 // proteolysis // inferred from elect             |                                  |
| NM_0013132   | NR_001313714   | 0.001313714  | 0.001313714             | 0.001313714 | -1.46        | -1.34    | 1.47          | -1.60                                                   | <b>Sp100</b>                                                                                                         | nuclear antigen Sp100                                                                                                | 0000723 // telomere maintenance // inferred from sequence or structural similarity // 0006338 // chromatin rem               |                                  |
| NM_011530    | NR_573E-04     | 0.05744587   | 0.05744587              | 0.05744587  | 1.21         | 1.42     | -1.07         | -1.60                                                   | <b>Tsp2</b>                                                                                                          | transporter 2, ATP-binding cassette, sub-family B (MDR/TAP)                                                          | 0001916 // positive regulation of cell mediated cytotoxicity // inferred from direct assay // 0001916 // positive r          |                                  |
| NM_013612    | NR_006495773   | 0.006495774  | 0.006495774             | 0.006495774 | -1.19        | -1.01    | 1.36          | -1.61                                                   | <b>Ski1a1</b>                                                                                                        | solute carrier family 11 (proton-coupled divalent metal ion transporters), member 1                                  | 0000050 // protein import into nucleus, translocation // inferred from mutant phenotype // 0000165 // MAPK casc              |                                  |
| NM_001170853 | NR_006495971   | 0.006495971  | 0.006495971             | 0.006495971 | -1.64        | -1.59    | 1.57          | -1.61                                                   | <b>R204a</b>                                                                                                         | retinoic acid receptor 204 // 205 // myeloid cell nuclear differentiation antigen 2                                  | 0001012 // negative regulation of transcription from RNA polymerase II promoter // - // 0003038 // negative re               |                                  |
| NM_011452    | NR_006495971   | 0.006495971  | 0.006495971             | 0.006495971 | 1.41         | 1.53     | 1.49          | -1.61                                                   | <b>Serp1n9b</b>                                                                                                      | serpin (or cysteine) activated inhibitor, class B, member 9b                                                         | 0001951 // negative regulation of endopeptidase activity // not recorded // 0001935 // cytotoxicity // inferred fr           |                                  |
| NM_001254744 | NR_0005418789  | 0.028454479  | 0.06375431              | 0.06375431  | -1.06        | 1.37     | 1.11          | -1.62                                                   | <b>E03003006Rik</b>                                                                                                  | RIKEN cDNA E03003006 gene                                                                                            | 0007049 // cell cycle // inferred from electronic annotation // 0042127 // regulation of cell proliferation // infer         |                                  |
| NM_007281    | NR_01870459    | 0.01870459   | 0.01903932              | 0.01903932  | -1.17        | -1.13    | 1.62          | -1.62                                                   | <b>Mettl21e</b>                                                                                                      | methyltransferase like 21E                                                                                           | 0003259 // methylation // inferred from electronic annotation                                                                |                                  |
| NM_198095    | NR_011248766   | 0.011248766  | 0.011248766             | 0.011248766 | -1.24        | -1.18    | 1.57          | -1.64                                                   | <b>Bst2</b>                                                                                                          | bone marrow stromal cell antigen 2                                                                                   | 0002376 // immune system process // inferred from electronic annotation // 0002737 // negative regulation of pla             |                                  |
| NM_029847    | NR_006517456   | 0.006517456  | 0.006517456             | 0.006517456 | -1.46        | -1.02    | 1.16          | -1.65                                                   | <b>Arsk</b>                                                                                                          | arylsulfatase K                                                                                                      | 0008152 // metabolic process // inferred from electronic annotation                                                          |                                  |
| NM_028801    | NR_006506653   | 0.006506653  | 0.006506653             | 0.006506653 | -2.91        | -6.20    | 3.52          | -1.65                                                   | <b>Muc5b</b>                                                                                                         | mucin 5, subtype B, tracheobronchial                                                                                 | 0042742 // defense response to bacterium // inferred from mutant phenotype // 00043030 // regulation of macrop               |                                  |
| NM_183249    | NR_0034024853  | 0.011973868  | 0.37563986              | 0.37563986  | 1.28         | 1.48     | 1.44          | -1.66                                                   | <b>Wf4c21</b>                                                                                                        | WAP-four disulfide core domain 21                                                                                    | 0010466 // negative regulation of peptidase activity // inferred from electronic annotation // 0003496 // response           |                                  |
| NM_008360    | NR_034024853   | 0.011973868  | 0.37563986              | 0.37563986  | -1.21        | 1.58     | -1.15         | -1.66                                                   | <b>I18</b>                                                                                                           | interleukin 18                                                                                                       | 0000165 // MAPK cascade // not recorded // 0001525 // angiogenesis // not recorded // 0001525 // angiogenesis, i             |                                  |
| NM_013930    | NR_011973868   | 0.011973868  | 0.37563986              | 0.37563986  | -1.91        | -1.36    | 1.18          | -1.66                                                   | <b>Aass</b>                                                                                                          | aminoadipate-semialdehyde synthase                                                                                   | 0006091 // generation of precursor metabolites and energy // traceable author statement // 0008152 // metabolic              |                                  |
| NM_008611    | NR_011973868   | 0.011973868  | 0.37563986              | 0.37563986  | 1.38         | 1.21     | 1.91          | -1.67                                                   | <b>Mmp8</b>                                                                                                          | matrix metalloproteinase 8                                                                                           | 0006508 // proteolysis // not recorded // 00030574 // collagen catabolic process // inferred from electronic anat            |                                  |
| NM_023785    | NR_011973868   | 0.011973868  | 0.37563986              | 0.37563986  | -1.89        | -1.94    | 1.73          | -1.69                                                   | <b>Pbbp</b>                                                                                                          | pro-platelet basic protein                                                                                           | 0002523 // leukocyte migration involved in inflammatory response // inferred from mutant phenotype // 0002690                |                                  |
| NM_010734    | NR_011973868   | 0.011973868  | 0.37563986              | 0.37563986  | -1.56        | -1.38    | 1.49          | -1.69                                                   | <b>Lst1</b>                                                                                                          | leukocyte specific transcript 1                                                                                      | 0000902 // cell morphogenesis // inferred from electronic annotation // 0002376 // immune system process // inf              |                                  |
| NM_011517    | NR_06025549    | 0.04851214   | 0.54293686              | 0.54293686  | -1.80        | 1.27     | -1.34         | -1.71                                                   | <b>Syp3</b>                                                                                                          | synaptonemal complex protein 3                                                                                       | 0000711 // meiotic DNA repair synthesis // inferred from genetic interaction // 0007049 // cell cycle // inferred fr         |                                  |
| NM_001317105 | NR_133862      | 0.005208184  | 0.245E-04               | 0.245E-04   | 1.37         | 1.48     | 1.59          | -1.71                                                   | <b>Pig</b>                                                                                                           | fibronectin gamma chain                                                                                              | 0002250 // adaptive immune response // inferred from electronic annotation // 0002376 // immune system proces                |                                  |
| NM_001291892 | NR_001291893   | 0.001291893  | 0.001291893             | 0.001291893 | 1.56         | 1.77     |               |                                                         |                                                                                                                      |                                                                                                                      |                                                                                                                              |                                  |

| RefSeq Transcript ID (p (Genotype)   (p (Genotype-Exposure)   (p (Exposure)   FC WT:KO   FC KO Air:O3   FD Air WT:KO   FD O3 WT:KO   Gene Symbol   Gene Title   Gene Ontology Biological Process |                                              |             |             |       |       |       |       |                     |                                                                                                   |                                                                                                                       |
|--------------------------------------------------------------------------------------------------------------------------------------------------------------------------------------------------|----------------------------------------------|-------------|-------------|-------|-------|-------|-------|---------------------|---------------------------------------------------------------------------------------------------|-----------------------------------------------------------------------------------------------------------------------|
| NM_017373//XM.J                                                                                                                                                                                  | 0.15306924                                   | 0.002679221 | 4.19E-05    | 1.48  | 3.96  | -1.34 | 2.00  | <b>Nfj13</b>        | nuclear factor, interleukin 3, regulated                                                          | 0000122 // negative regulation of transcription from RNA polymerase II promoter // not recorded//0006351 // tr        |
| NM_025416                                                                                                                                                                                        | 0.020313757                                  | 0.042609792 | 0.08676615  | -1.10 | 1.72  | 1.10  | 2.08  | <b>Them5</b>        | thioesterase superfamily member 5                                                                 | 0006629 // lipid metabolic process // inferred from electronic annotation//0006631 // fatty acid metabolic proce      |
| NM_010247//XM.J                                                                                                                                                                                  | 2.24E-05                                     | 0.002021546 | 0.09661372  | -1.14 | 1.55  | 1.17  | 2.08  | <b>Psmb8</b>        | proteasome (prosome, macropain) subunit, beta type 8 (large multifunctional peptidase 7)          | 0002376 // immune system process // inferred from electronic annotation//0006508 // proteolysis // inferred fro       |
| NM_001310640//X                                                                                                                                                                                  | 0.00892747                                   | 0.026918758 | 2.12E-05    | 2.09  | 4.28  | 2.01  | 2.08  | <b>Pmva</b>         | phosphomevalonate kinase                                                                          | 0006629 // lipid metabolic process // inferred from electronic annotation//0006694 // steroid biosynthetic proce      |
| NM_028967//XM.J                                                                                                                                                                                  | 6.63E-04                                     | 0.013054218 | 0.014988259 | -1.04 | 1.80  | 1.12  | 2.11  | <b>Raf2</b>         | basic leucine zipper transcription factor, ATF-like 2                                             | 0006351 // transcription, DNA-templated // inferred from electronic annotation//0006355 // regulation of transc       |
| NM_001271005//X                                                                                                                                                                                  | 6.43E-05                                     | 0.011145398 | 0.96271     | -1.21 | 1.36  | 1.30  | 2.14  | <b>H2-123</b>       | histocompatibility 2, T region locus 23                                                           | 0001916 // positive regulation of T cell mediated cytotoxicity // inferred from direct assay//0001915 // positive r   |
| NM_010531//XM.I                                                                                                                                                                                  | 6.64E-05                                     | 0.001810247 | 0.001231183 | 1.09  | 1.78  | 1.32  | 2.16  | <b>I18bp</b>        | interleukin 18 binding protein                                                                    | 0004208 // T-helper 1 type im                                                                                         |
| NM_001037713//X                                                                                                                                                                                  | 0.001291513//XM_006533567//XM_006533568//XM_ |             |             | -1.24 | -1.12 | 1.97  | 2.19  | <b>Xaf1</b>         | XIAP associated factor 1                                                                          | 0006915 // apoptotic process // inferred from electronic annotation//0031333 // negative regulation of protein c      |
| NM_027209//XM_011247337                                                                                                                                                                          |                                              |             |             | -1.66 | -1.18 | 1.56  | 2.20  | <b>Msa6b</b>        | membrane-spanning 4-domains, subfamily A, member 6B                                               |                                                                                                                       |
| NM_015783//XR_188557//XJ_397495                                                                                                                                                                  |                                              |             |             | -1.27 | -1.62 | 2.85  | 2.24  | <b>Isg15</b>        | ISG15 ubiquitin-like modifier                                                                     |                                                                                                                       |
| NM_153590//XM_006506121//XM_006506122//XM_006                                                                                                                                                    |                                              |             |             | -1.54 | -1.28 | 1.89  | 2.26  | <b>Kir1</b>         | killer cell lectin-like receptor family E member 1                                                | 0019941 // modification-dependent protein catalytic process // inferred from direct assay//0031397 // negative        |
| NM_001302559//X                                                                                                                                                                                  | 1.27E-06                                     | 8.77E-04    | 1.11E-05    | -1.66 | -4.51 | 6.15  | 2.27  | <b>Sjfn4//Sjfn3</b> | schlafen 4//schlafen 3                                                                            | 0002223 // stimulatory C-type lectin receptor signaling pathway // inferred from direct assay//0002859 // negati      |
| NM_001305935//X                                                                                                                                                                                  | 0.03148155                                   | 0.012993463 | 0.24723457  | -1.92 | -1.48 | -1.18 | 2.40  | <b>Nctd4b</b>       | branched chain ketoacid dehydrogenase E1, beta polypeptide                                        | 0008285 // negative regulation of cell proliferation // inferred from direct assay                                    |
| NM_008331                                                                                                                                                                                        |                                              |             |             | -1.78 | -1.76 | 2.43  | 2.45  | <b>Pyha1</b>        | pyrin and NIN domain family, member 1                                                             | 0001152 // metabolic process // inferred from electronic annotation//0009063 // cellular amino acid catabolic pr      |
| NM_001080941//X                                                                                                                                                                                  | 0.033015296                                  | 0.047486916 | 0.3625288   | -1.97 | 1.24  | 1.06  | 2.60  | <b>Zfp429</b>       | interferon-induced protein with tetratricopeptide repeats 1                                       | 0002376 // immune system process // inferred from electronic annotation//0009615 // response to virus // infer        |
| NM_011073//XM.J                                                                                                                                                                                  | 2.40E-06                                     | 0.013736106 | 0.49245003  | -1.33 | 1.12  | 1.76  | 2.61  | <b>Prf1</b>         | zinc finger protein 429                                                                           | 0006355 // regulation of transcription, DNA-templated // inferred from electronic annotation                          |
| NM_001314054//NM_031168                                                                                                                                                                          |                                              |             |             | 5.31  | 11.59 | 1.20  | 2.60  | <b>I6</b>           | perforin 1 (pore forming protein)                                                                 | 0001771 // immunological synapse formation // not recorded//0002357 // defense response to tumor cell // infe         |
| NM_011403                                                                                                                                                                                        |                                              |             |             | -2.95 | -1.40 | 1.28  | 2.69  | <b>Sic1a1</b>       | interleukin 6                                                                                     | 0001781 // neutrophil apoptotic process // inferred from direct assay//0001781 // neutrophil apoptotic process //     |
| NM_139198//XM_011249430                                                                                                                                                                          |                                              |             |             | -1.70 | -1.21 | 1.93  | 2.72  | <b>Ploc8</b>        | solute carrier family 4 (anion exchanger), member 1                                               | 0006810 // transport // inferred from electronic annotation//0006811 // ion transport // inferred from electronic     |
| NM_029499//XM_006527250//XM_006527251                                                                                                                                                            |                                              |             |             | -1.85 | -1.55 | 2.31  | 2.75  | <b>Msa4c</b>        | placenta-specific 8                                                                               | 0008284 // positive regulation of cell proliferation // inferred from direct assay//0009409 // response to cold // ir |
| NM_001143686                                                                                                                                                                                     |                                              |             |             | -2.40 | -1.78 | 2.05  | 2.76  | <b>Apol11b</b>      | membrane-spanning 4-domains, subfamily A, member 4C                                               |                                                                                                                       |
| NM_013855//XM.I                                                                                                                                                                                  | 1.19E-05                                     | 5.73E-04    | 0.5460914   | -1.50 | 1.52  | 1.23  | 2.80  | <b>Psmb9</b>        | apolipoprotein L11b                                                                               | 0008689 // lipid transport // inferred from electronic annotation//0041217 // lipoprotein metabolic process // inf    |
| NM_028386//XM_006522491                                                                                                                                                                          |                                              |             |             | -1.57 | -1.23 | 2.22  | 2.83  | <b>Rtp4</b>         | proteasome (prosome, macropain) subunit, beta type 9 (large multifunctional peptidase 2)          | 0002376 // immune system process // inferred from electronic annotation//0006508 // proteolysis // inferred fro       |
| NM_001161730//X                                                                                                                                                                                  | 6.23E-06                                     | 7.33E-04    | 0.080780625 | -1.29 | 1.70  | 1.32  | 2.90  | <b>Tap1</b>         | receptor transporter protein 4                                                                    | 0001580 // detection of chemical stimulus involved in sensory perception of bitter taste // not recorded//0006611     |
| NM_137869                                                                                                                                                                                        | 0.002842786                                  | 0.025394054 | 0.031699836 | -1.03 | 2.22  | 1.28  | 2.94  | <b>Sfp21a</b>       | transporter 1, ATP-binding cassette, subfamily B (MDR/TPA)                                        | 0002250 // adaptive immune response // inferred from electronic annotation//0002376 // immune system proce            |
| NM_001281830//NM_029803                                                                                                                                                                          |                                              |             |             | -2.98 | -2.64 | 2.68  | 3.02  | <b>Ifi271a</b>      | stefin A2 like 1                                                                                  | 0010951 // negative regulation of endopeptidase activity // inferred from electronic annotation                       |
| NM_010654//XM_006505655//XM_006505656                                                                                                                                                            |                                              |             |             | -2.08 | -1.19 | 1.73  | 3.03  | <b>Kir1d1</b>       | interferon, alpha-inducible protein 27 like 2A                                                    | 0007568 // aging // inferred from direct assay//000615 // response to virus // inferred from direct assay             |
| NM_172777//XM.J                                                                                                                                                                                  | 7.16E-05                                     | 1.21E-04    | 0.010784728 | -2.16 | 1.44  | -1.03 | 3.04  | <b>Gbp9</b>         | killer cell lectin-like receptor, subfamily D, member 1                                           | 0002228 // natural killer cell mediated immunity // not recorded                                                      |
| NM_001205313//X                                                                                                                                                                                  | 1.71E-06                                     | 9.54E-04    | 0.1928924   | -1.26 | 1.65  | 1.49  | 3.08  | <b>Stat1</b>        | signal transducer and activator of transcription 1                                                | 0008152 // metabolic process // inferred from electronic annotation//0042832 // defense response to protozoan         |
| NM_001252600//NM_001252601//NM_016850//XM_006536214                                                                                                                                              |                                              |             |             | -1.35 | -1.46 | 3.34  | 3.09  | <b>Irf7</b>         | interferon regulatory factor 7                                                                    | 0002376 // immune system process // inferred from electronic annotation//0002819 // regulation of adaptive im         |
| NM_008326//XM.I                                                                                                                                                                                  | 4.82E-07                                     | 0.001143392 | 6.02E-04    | 1.04  | 1.99  | 1.62  | 3.09  | <b>Irgm1</b>        | immunity-related GTPase family M member 1                                                         | 0002376 // immune system process // inferred from electronic annotation//0006914 // autophagy // inferred fro         |
| NM_145211//XM.J                                                                                                                                                                                  | 9.80E-09                                     | 0.03495188  | 1.72E-05    | -1.43 | -1.68 | 3.66  | 3.10  | <b>Oas1a</b>        | 2'-5' oligoadenylate synthetase 1A                                                                | 0002376 // immune system process // inferred from electronic annotation//0006164 // purine nucleotide biosynt         |
| NM_001139519//X                                                                                                                                                                                  | 1.96E-06                                     | 0.021276742 | 0.010490653 | -1.01 | 1.65  | 1.88  | 3.11  | <b>Zbp1</b>         | Z-DNA binding protein 1                                                                           | 0002376 // immune system process // inferred from electronic annotation//0008152 // metabolic process // inf          |
| NM_001162883//NM_001168660//NM_173743//NM_173786//XM_00652                                                                                                                                       |                                              |             |             | -1.48 | -1.38 | 2.95  | 3.15  | <b>ApoB9//ApoBb</b> | apolipoprotein L9a//apolipoprotein L9b                                                            | 0006869 // lipid transport // inferred from electronic annotation//0042157 // lipoprotein metabolic process // inf    |
| NM_144559                                                                                                                                                                                        | 3.09E-06                                     | 0.00304968  | 0.002918902 | -1.04 | 1.89  | 1.64  | 3.21  | <b>Fcgr4</b>        | Fc receptor, IgG, low affinity IV                                                                 | 0001866 // NK T cell proliferation // not recorded//0051930 // regulation of sensory perception of pain // not rec    |
| NM_011854//XM_006530314//XM_006530315//XM_006530316                                                                                                                                              |                                              |             |             | -1.39 | -1.38 | 3.35  | 3.37  | <b>Oas1z</b>        | 2'-5' oligoadenylate synthetase-like 2                                                            | 0002376 // immune system process // inferred from electronic annotation//0006164 // purine nucleotide biosynt         |
| NM_001293690//X                                                                                                                                                                                  | 0.003732                                     | 0.00231509  | 0.021634238 | -1.29 | 2.66  | 1.00  | 3.43  | <b>Irf1</b>         | indoleamine 2,3-dioxygenase 1                                                                     | 0002376 // immune system process // inferred from electronic annotation//0002534 // cytokine production invol         |
| NM_029509//XM.J                                                                                                                                                                                  | 0.025589565                                  | 0.007223136 | 0.11731671  | -1.48 | 2.60  | -1.11 | 3.45  | <b>Gbp8</b>         | guanylate-binding protein 8                                                                       | 0008152 // metabolic process // inferred from electronic annotation//0071346 // cellular response to interferon-g     |
| NM_173886                                                                                                                                                                                        | 1.03E-04                                     | 0.011639653 | 0.06928708  | -1.16 | 1.80  | 1.66  | 3.45  | <b>Sic2s3a1</b>     | solute carrier family 25 (mitochondrial carrier; adenine nucleotide translocator), member 31      | 0006810 // transport // inferred from electronic annotation//0005085 // transmembrane transport // inferred fr        |
| NM_010260                                                                                                                                                                                        | 5.92E-05                                     | 1.37E-04    | 0.80003136  | -1.75 | 2.04  | 1.01  | 3.59  | <b>Gbp2</b>         | guanylate binding protein 2                                                                       | 0008152 // metabolic process // inferred from electronic annotation//0035458 // cellular response to interferon-I     |
| NM_175449                                                                                                                                                                                        | 0.002981814                                  | 0.044325806 | 0.6242128   | -1.50 | 1.62  | 1.52  | 3.70  | <b>Fam26f</b>       | family with sequence similarity 26, member F                                                      | 0006810 // transport // inferred from electronic annotation//0006811 // ion transport // inferred from electronic     |
| NM_011315                                                                                                                                                                                        |                                              |             |             | 4.04  | 2.44  | 6.20  | 3.74  | <b>Saa3</b>         | serum amyloid A 3                                                                                 | 0006953 // acute-phase response // inferred from electronic annotation//0007252 // I-kappaB phosphorylation //        |
| NM_001271676//X                                                                                                                                                                                  | 1.75E-06                                     | 7.61E-05    | 0.052070796 | -1.42 | 2.20  | 1.36  | 4.24  | <b>Ifi47</b>        | interferon gamma inducible protein 47                                                             | 0006952 // defense response // inferred from mutant phenotype//0007165 // signal transduction // inferred fro         |
| NM_024253                                                                                                                                                                                        | 4.18E-04                                     | 0.038715716 | 0.90266514  | -1.64 | 1.48  | 1.75  | 4.25  | <b>Nkg7</b>         | natural killer cell group 7 sequence                                                              |                                                                                                                       |
| NM_001039160//X                                                                                                                                                                                  | 3.29E-07                                     | 5.64E-05    | 0.29797998  | -1.50 | 1.92  | 1.55  | 4.47  | <b>Ovin1</b>        | GTPase, very large interferon inducible 1                                                         | 0001503 // ossification // not recorded//0002376 // immune system process // inferred from electronic annotatio       |
| NM_021384//NM_011243886                                                                                                                                                                          |                                              |             |             | -1.82 | -1.44 | 3.55  | 4.48  | <b>Rasd2</b>        | radical S-adenosyl methionine domain containing 2                                                 | 0001666 // response to hypoxia // inferred from electronic annotation//0001889 // liver development // infer          |
| NM_001136059//NM_009092//XM_006510810                                                                                                                                                            |                                              |             |             | -6.59 | -3.43 | 2.36  | 4.53  | <b>Cypl1a1</b>      | cytochrome P450, family 1, subfamily A, polypeptide 1                                             | 0009396 // muscle contraction // not recorded//0008152 // metabolic process // inferred from electronic anot          |
| NM_030679//NM.I                                                                                                                                                                                  | 0.9685817                                    | 0.034358054 | 0.9833375   | -4.93 | 4.86  | -4.93 | 4.87  | <b>Myh1//Myh4</b>   | myosin, heavy polypeptide 1, skeletal muscle, adult//myosin, heavy polypeptide 4, skeletal muscle | 0008152 // metabolic process // inferred from electronic annotation//0042832 // defense response to protozoan         |
| NM_001083312//X                                                                                                                                                                                  | 1.08E-05                                     | 3.38E-04    | 0.22118247  | -1.58 | 2.29  | 1.36  | 4.93  | <b>Gbp7</b>         | guanylate binding protein 7                                                                       | 0001913 // T cell mediated cytotoxicity // inferred from mutant phenotype//0006508 // proteolysis // inferred fr      |
| NM_013542                                                                                                                                                                                        | 4.09E-07                                     | 0.007064547 | 0.08473857  | -1.69 | 1.23  | 2.44  | 5.07  | <b>Gamb</b>         | granzyme B                                                                                        | 0002376 // immune system process // inferred from electronic annotation//0032088 // negative regulation of NF         |
| NM_001033207//X                                                                                                                                                                                  | 3.61E-06                                     | 0.012560561 | 0.24143435  | -1.29 | 1.75  | 2.25  | 5.08  | <b>Nlr3</b>         | NLR family, CARD domain containing 5                                                              | 0004341 // response to interferon-gamma // inferred from direct assay//0034341 // response to interferon-gamm         |
| NM_019440                                                                                                                                                                                        | 1.35E-06                                     | 1.46E-04    | 0.035187297 | -1.41 | 2.39  | 1.55  | 5.20  | <b>Irgm2</b>        | immunity-related GTPase family M member 2                                                         | 0006955 // immune response // non-traceable author statement//000615 // response to virus // inferred from d          |
| NM_001145164//X                                                                                                                                                                                  | 3.88E-07                                     | 6.50E-04    | 0.00193326  | -1.06 | 2.44  | 2.09  | 5.42  | <b>Tgtp1//Tgtp2</b> | T cell specific GTPase 1//T cell specific GTPase 2                                                | 0006955 // immune response // not recorded//0007165 // signal transduction // not recorded//0007166 // cell           |
| NM_021893//XM.J                                                                                                                                                                                  | 3.39E-05                                     | 3.35E-04    | 5.14E-04    | -1.07 | 4.44  | 1.23  | 5.88  | <b>Ccl27a</b>       | CD274 antigen                                                                                     | 0035458 // cellular response to interferon-beta // inferred from direct assay                                         |
| NM_018738                                                                                                                                                                                        | 1.79E-07                                     | 3.68E-05    | 0.02253012  | -1.51 | 2.59  | 1.84  | 7.20  | <b>Igtg</b>         | interferon gamma induced GTPase                                                                   | 0008152 // metabolic process // inferred from electronic annotation//0035458 // cellular response to interferon-I     |
| NM_001289492//X                                                                                                                                                                                  | 2.14E-06                                     | 4.39E-04    | 0.07993907  | -2.35 | 1.66  | 1.87  | 7.28  | <b>Gbp3</b>         | guanylate binding protein 3                                                                       | 0002376 // immune system process // inferred from electronic annotation//0008152 // metabolic process // infer        |
| NM_001146275//X                                                                                                                                                                                  | 4.10E-06                                     | 6.57E-04    | 0.057767134 | -1.47 | 2.75  | 1.83  | 7.39  | <b>Hgp1</b>         | interferon inducible GTPase 1                                                                     |                                                                                                                       |
| NM_133871//XM_006502485//XM_006502486                                                                                                                                                            |                                              |             |             | -2.92 | -1.92 | 5.04  | 7.66  | <b>Ifi44</b>        | interferon-induced protein 44                                                                     |                                                                                                                       |
| NM_010370                                                                                                                                                                                        | 2.06E-06                                     | 0.004724333 | 0.00905636  | -2.57 | 1.16  | 2.67  | 7.98  | <b>Gzma</b>         | granzyme A                                                                                        | 0006508 // proteolysis // inferred from electronic annotation//0006915 // apoptotic process // inferred from elec     |
| NM_194336//XM.I                                                                                                                                                                                  | 7.76E-07                                     | 3.69E-05    | 0.37096202  | -2.64 | 2.32  | 1.63  | 10.01 | <b>Gbp6</b>         | guanylate binding protein 6                                                                       | 0006955 // immune response // inferred from mutant phenotype//0008152 // metabolic process // inferred fro            |
| NM_001033767//X                                                                                                                                                                                  | 4.80E-06                                     | 0.043635536 | 0.7827524   | -1.50 | 1.72  | 4.07  | 10.48 | <b>Gm4951</b>       | predicted gene 4951                                                                               | 0035458 // cellular response to interferon-beta // inferred from direct assay                                         |

Table S7. Common genes altered by O3 in Tnfr- and Nfkb1-dependent manner (n=341)

Venn Diagram analysis of Tnfr-dependent genes (n=2180, pooled from 24, 48, and 72 hr O3) and Nfkb1-dependent genes (n=2397). Fold difference (FD); Positive-higher in KO-O3, negative-lower in KO-O3, compared to corresponding WT-O3.

| RefSeq                     | Transcript ID | p Tnfr 24 hr | p Tnfr 48hr | p Tnfr 72 hr | p Nfkb1 | FD Tnfr 24 hr | FD Tnfr 48 hr | FD Nfkb1    | Gene Symbol                            | Gene Title                                                                          | Gene Ontology                                                                                                            |                                                                                                                         |
|----------------------------|---------------|--------------|-------------|--------------|---------|---------------|---------------|-------------|----------------------------------------|-------------------------------------------------------------------------------------|--------------------------------------------------------------------------------------------------------------------------|-------------------------------------------------------------------------------------------------------------------------|
| NM_010370                  |               | 0.031957     |             |              |         | -1.27         | -1.89         | -1.36       | <b>7.98</b> <i>Gzma</i>                | granzyme A                                                                          | 0006508 // proteolysis // inferred from electronic annotation//0006915 // apoptotic process // inferred from electro     |                                                                                                                         |
| NM_001136059//NM_009992//X |               | 0.021329     |             |              |         | -1.64         | <b>1.21</b>   | -1.57       | <b>4.53</b> <i>Cyp11a1</i>             | cytochrome P450, family 1, subfamily a, polypeptide 1                               | 0001666 // response to hypoxia // inferred from electronic annotation//0001889 // liver development // inferred from     |                                                                                                                         |
| NM_024253                  |               | 0.0126742    |             |              |         | -1.03         | -1.48         | -1.30       | <b>4.25</b> <i>Nkg7</i>                | natural killer cell group 7 sequence                                                | 0005515 // protein binding // inferred from electronic annotation                                                        |                                                                                                                         |
| NM_001293690//NM_008324    |               | 0.0474173    |             |              |         | -1.02         | -1.31         | -1.08       | <b>3.43</b> <i>Id1</i>                 | indoleamine 2,3-dioxygenase 1                                                       | 0002376 // immune system process // inferred from electronic annotation//0002534 // cytokine production involved         |                                                                                                                         |
| NM_144559                  |               | 0.0320214    |             |              |         | 0.3202        | <b>1.04</b>   | -1.07       | <b>3.21</b> <i>Fcgr4</i>               | FC receptor, IgG, low affinity IV                                                   | 0001866 // NK T cell proliferation // not recorded//0051930 // regulation of sensory perception of pain // not record    |                                                                                                                         |
| NM_013585//NM_006523730//X |               | 0.0428359    |             |              |         | 0.4284        | <b>1.16</b>   | -1.25       | <b>1.14</b> <b>2.80</b> <i>Psmb9</i>   | proteasome (prosome, macropain) subunit, beta type 9 (large multifunctional pep     | 0002376 // immune system process // inferred from electronic annotation//0006508 // proteolysis // inferred from e       |                                                                                                                         |
| NM_029499//NM_001          |               | 0.0458086    |             |              |         | 0.04581       | <b>1.26</b>   | -1.02       | <b>2.75</b> <i>Ms404c</i>              | membrane-spanning 4-domains, subfamily A, member 4C                                 | 0005887 // integral component of plasma membrane // inferred from electronic annotation//0016020 // membrane,            |                                                                                                                         |
| NM_139198//NM_001          |               | 0.0379849    |             |              |         | 0.03798       | <b>1.85</b>   | -1.21       | <b>1.44</b> <b>2.72</b> <i>Plac8</i>   | placenta-specific 8                                                                 | 0002884 // positive regulation of cell proliferation // inferred from direct assay//0009409 // response to cold // infer |                                                                                                                         |
| NM_001314054//NM_00109972  |               |              |             |              |         | 0.011         | <b>1.78</b>   | -1.17       | -1.01                                  | <b>2.63</b> <i>Irf6</i>                                                             | interleukin 6                                                                                                            | 0001781 // neutrophil apoptotic process // inferred from direct assay//0001781 // neutrophil apoptotic process // inf   |
| NM_001271005//NM_010398//X |               | 0.0493594    |             |              |         | 0.04936       | <b>1.02</b>   | -1.46       | -1.13                                  | <b>2.14</b> <i>H2-T23</i>                                                           | Riken cDNA C920025E04 gene//histocompatibility 2, T region locus 23                                                      | 0001916 // positive regulation of T cell mediated cytotoxicity // inferred from direct assay//0001916 // positive regul |
| NM_017373//NM_006516875//X |               | 0.0236738    |             |              |         | 0.02367       | -1.31         | -1.09       | -1.34                                  | <b>2.00</b> <i>Nfj3</i>                                                             | nuclear factor, interleukin 3, regulated                                                                                 | 0001222 // negative regulation of transcription from RNA polymerase II promoter // not recorded//0006351 // trans       |
| NM_010234                  |               | 0.0392224    |             |              |         | 0.03392       | <b>2.51</b>   | <b>1.06</b> | <b>1.09</b> <b>1.97</b> <i>Fos</i>     | FB1 osteosarcoma oncogene                                                           | 0001661 // conditioned taste aversion // inferred from electronic annotation//0006355 // regulation of transcription,    |                                                                                                                         |
| NM_015767//NM_001          |               | 0.0470459    |             |              |         | 0.04705       | -1.19         | -1.07       | <b>1.03</b> <b>1.96</b> <i>Tpa</i>     | tocopherol (alpha) transfer protein                                                 | 0001890 // placenta development // inferred from mutant phenotype//0001892 // embryonic placenta development             |                                                                                                                         |
| NM_001164059//NM_00140566  |               |              |             |              |         | 0.01406       | <b>1.72</b>   | -1.04       | -1.05                                  | <b>1.91</b> <i>Sell</i>                                                             | selectin, lymphocyte                                                                                                     | 0001755 // cell adhesion // inferred from electronic annotation//0032198 // response to ATP // inferred from direct:    |
| NM_001111059//NM_00477121  |               |              |             |              |         | 0.04771       | -1.83         | -1.03       | -1.41                                  | <b>1.78</b> <i>Cdkn1a</i>                                                           | cyclin-dependent kinase inhibitor 1A [P21]                                                                               | 0000079 // regulation of cyclin-dependent protein serine/threonine kinase activity // inferred from mutant phenotype,   |
| NM_021718                  |               | 0.0186814    |             |              |         | 0.01868       | <b>1.52</b>   | <b>1.11</b> | -1.09                                  | <b>1.77</b> <i>Ms404b</i>                                                           | membrane-spanning 4-domains, subfamily A, member 4B                                                                      | 0005887 // integral component of plasma membrane // inferred from direct assay//0016020 // membrane // inferred         |
| NM_001291892//NM_0090002   |               | 0.0301939    |             |              |         | 0.03019       | <b>1.65</b>   | <b>1.52</b> | <b>1.02</b> <b>1.71</b> <i>Lilr4b</i>  | leukocyte immunoglobulin-like receptor, subfamily B, member 4B//Lilr4a              | 0002250 // adaptive immune response // inferred from electronic annotation//0002376 // immune system process //          |                                                                                                                         |
| NM_010734                  |               | 0.0188023    |             |              |         | 0.01888       | <b>1.27</b>   | -1.13       | -1.09                                  | <b>1.69</b> <i>Lst1</i>                                                             | leukocyte specific transcript 1                                                                                          | 0000902 // cell morphogenesis // inferred from electronic annotation//0002376 // immune system process // infer         |
| NM_008611                  |               | 0.0280208    |             |              |         | 0.02802       | <b>1.07</b>   | -1.02       | <b>1.04</b> <b>1.67</b> <i>Mmp8</i>    | matrix metalloproteinase 8                                                          | 0006508 // proteolysis // not recorded//0030574 // collagen catabolic process // inferred from electronic annotation     |                                                                                                                         |
| NM_183249                  |               | 0.0327021    |             | 0.0431278    |         | 0.0327        | <b>1.24</b>   | <b>1.38</b> | <b>1.26</b> <b>1.66</b> <i>Wfdc21</i>  | WAP four-disulfide core domain 21                                                   | 0010466 // negative regulation of peptidase activity // inferred from electronic annotation//0032496 // response to I    |                                                                                                                         |
| NM_001159738//NM_00021256  |               | 0.0141236    |             | 0.0087143    |         | 0.01412       | -1.33         | -1.18       | -1.22                                  | <b>1.56</b> <i>Ccl20</i>                                                            | chemokine (C-C motif) ligand 20                                                                                          | 0002548 // monocyte chemotaxis // --//0006935 // chemotaxis // not recorded//0006954 // inflammatory respons            |
| NM_029495//NM_17           |               | 0.0158681    |             |              |         | 0.01587       | <b>1.09</b>   | -1.07       | -1.03                                  | <b>1.55</b> <i>Epst11</i>                                                           | epithelial stromal interaction 1 (breast)                                                                                |                                                                                                                         |
| NM_001252651//NM_00126991  |               |              |             |              |         | 0.0127        | <b>1.24</b>   | -1.23       | -1.21                                  | <b>1.51</b> <i>Csf3r</i>                                                            | colony stimulating factor 3 receptor (granulocyte)                                                                       |                                                                                                                         |
| NM_001013373//NM_006510132 |               | 0.0305592    |             |              |         | 0.03056       | -1.12         | -1.21       | -1.18                                  | <b>1.50</b> <i>Tmprss13</i>                                                         | transmembrane protease, serine 13                                                                                        |                                                                                                                         |
| NM_0010172                 |               | 0.0051493    |             | 8.73E-04     |         | 0.00172       | <b>1.18</b>   | <b>1.22</b> | <b>1.02</b> <b>1.50</b> <i>F7</i>      | coagulation factor VII                                                              |                                                                                                                          |                                                                                                                         |
| NM_009780//NM_001          |               | 0.0110776    |             | 0.0215402    |         | 0.02154       | -1.21         | -1.11       | -1.11                                  | <b>1.48</b> <i>C4b</i>                                                              | complement component 4B (Chido blood group)//complement C4-B                                                             |                                                                                                                         |
| NM_025989//NM_006508121//X |               | 0.0297162    |             |              |         | 0.02972       | -1.11         | <b>1.00</b> | <b>1.06</b> <b>1.48</b> <i>Gp2</i>     | glycoprotein 2 (zymogen granule membrane)                                           |                                                                                                                          |                                                                                                                         |
| NM_134133//NM_006525481//X |               | 0.0145036    |             |              |         | 0.0145        | -1.23         | <b>1.00</b> | -1.03                                  | <b>1.48</b> <i>Smlm3</i>                                                            | small integral membrane protein 3                                                                                        |                                                                                                                         |
| NM_001278269//NM_00166895  |               |              |             |              |         | 0.01669       | <b>1.40</b>   | -1.05       | -1.10                                  | <b>1.48</b> <i>Fyb</i>                                                              | FYN binding protein                                                                                                      |                                                                                                                         |
| NM_011756                  |               | 0.0041983    |             |              |         | 0.0042        | <b>1.46</b>   | <b>1.08</b> | <b>1.13</b> <b>1.46</b> <i>Zfp36</i>   | zinc finger protein 36                                                              |                                                                                                                          |                                                                                                                         |
| NM_178911//NM_001          |               | 0.032975     |             |              |         | 0.0033        | <b>1.50</b>   | -1.10       | -1.05                                  | <b>1.45</b> <i>Pld4</i>                                                             | phospholipase D family, member 4                                                                                         |                                                                                                                         |
| NM_008842                  |               | 0.0062451    |             |              |         | 0.00625       | <b>1.29</b>   | -1.11       | <b>1.01</b> <b>1.45</b> <i>Pim1</i>    | proliferal integration site 1                                                       |                                                                                                                          |                                                                                                                         |
| NM_007440//NM_011248676//X |               | 0.0202748    |             |              |         | 0.02027       | -1.04         | -1.25       | -1.01                                  | <b>1.42</b> <i>Alox12</i>                                                           | arachidonate 12-lipoxygenase                                                                                             |                                                                                                                         |
| NM_010501//NM_001          |               | 0.048251     |             |              |         | 0.04825       | <b>1.29</b>   | -1.08       | <b>1.28</b> <b>1.41</b> <i>Ifit3</i>   | interferon-induced protein with tetratricopeptide repeats 3                         |                                                                                                                          |                                                                                                                         |
| NM_009396//NM_006515792//X |               | 0.0045507    |             |              |         | 0.00455       | <b>1.09</b>   | -1.20       | <b>1.02</b> <b>1.40</b> <i>Tnfrsf2</i> | tumor necrosis factor, alpha-induced protein 2                                      |                                                                                                                          |                                                                                                                         |
| NM_001127348//NM_00269581  |               |              |             |              |         | 0.02696       | <b>1.07</b>   | <b>1.03</b> | <b>1.37</b> <i>Srs10</i>               | springerovirus 10                                                                   |                                                                                                                          |                                                                                                                         |
| NM_138683//NM_006502862    |               | 0.0042547    |             |              |         | 0.00425       | -1.05         | -1.21       | -1.09                                  | <b>1.37</b> <i>Rgs19</i>                                                            | Rgspondin 1                                                                                                              |                                                                                                                         |
| NM_019521                  |               | 4.51E-04     |             | 0.0107763    |         | 0.01078       | -1.25         | -1.16       | <b>1.04</b> <b>1.36</b> <i>Gas6</i>    | growth arrest specific 6                                                            |                                                                                                                          |                                                                                                                         |
| NM_025427                  |               | 0.0063318    |             |              |         | 0.00633       | -1.65         | -1.27       | -1.05                                  | <b>1.35</b> <i>Rgcc</i>                                                             | regulator of cell cycle                                                                                                  |                                                                                                                         |
| NM_009151//NM_001          |               | 0.0478234    |             |              |         | 0.04784       | <b>1.21</b>   | -1.01       | -1.06                                  | <b>1.35</b> <i>Selp1g</i>                                                           | selectin, platelet (alpha-selectin) ligand                                                                               |                                                                                                                         |
| NM_013599//NM_001          |               | 0.0026953    |             |              |         | 0.0027        | <b>1.07</b>   | -1.29       | -1.46                                  | <b>1.34</b> <i>Mmp9</i>                                                             | matrix metalloproteinase 9                                                                                               |                                                                                                                         |
| NM_026835                  |               | 0.0483779    |             |              |         | 0.04838       | <b>1.14</b>   | <b>1.58</b> | <b>1.15</b> <b>1.33</b> <i>Ms404d</i>  | membrane-spanning 4-domains, subfamily A, member 6D                                 |                                                                                                                          |                                                                                                                         |
| NM_153071//NM_001          |               | 0.0285745    |             |              |         | 0.02857       | -1.10         | -1.02       | -1.07                                  | <b>1.33</b> <i>Gprc6a</i>                                                           | G protein-coupled receptor, family C, group 6, member 6A                                                                 |                                                                                                                         |
| NM_001033301//NM_001205355 |               | 0.02936      |             |              |         | 0.02936       | -1.57         | -1.60       | -1.14                                  | <b>1.31</b> <i>Fhd1</i>                                                             | FHD domain containing 1                                                                                                  |                                                                                                                         |
| NM_015786                  |               | 0.0114646    |             |              |         | 0.01146       | -1.04         | -1.37       | -1.14                                  | <b>1.31</b> <i>Hist1h1c</i>                                                         | histone cluster 1, H1c                                                                                                   |                                                                                                                         |
| NM_001001892//NM_001267808 |               | 0.0411866    |             |              |         | 0.04119       | <b>1.05</b>   | -1.18       | -1.08                                  | <b>1.30</b> <i>H2-D1</i>                                                            | histocompatibility 2, D region locus 1//histocompatibility 2, H1c, K region//histoc                                      |                                                                                                                         |
| NM_145953//NM_006500815    |               | 0.0206117    |             |              |         | 0.02061       | -1.24         | <b>1.33</b> | -1.05                                  | <b>1.29</b> <i>Chc</i>                                                              | cystathionase (cystathionine gamma-lyase)                                                                                |                                                                                                                         |
| NM_001164885//NM_00081215  |               | 0.0186868    |             |              |         | 0.01869       | -1.24         | -1.06       | <b>1.16</b> <b>1.27</b> <i>Lpin2</i>   | lipin 2                                                                             |                                                                                                                          |                                                                                                                         |
| NM_001160163//NM_001160164 |               | 0.03408      |             |              |         | 0.03408       | -1.02         | -1.23       | -1.05                                  | <b>1.26</b> <i>Neu2</i>                                                             | neuraminidase 2                                                                                                          |                                                                                                                         |
| NM_013566//NM_001          |               | 0.0116526    |             |              |         | 0.01165       | <b>1.31</b>   | -1.13       | -1.16                                  | <b>1.25</b> <i>Irbp7</i>                                                            | integrin beta 7                                                                                                          |                                                                                                                         |
| NM_016675//NM_001          |               | 0.0374343    |             |              |         | 0.03743       | <b>1.14</b>   | <b>1.00</b> | -1.01                                  | <b>1.25</b> <i>Cldn2</i>                                                            | claudin 2                                                                                                                |                                                                                                                         |
| NM_029688                  |               | 0.0112739    |             |              |         | 0.01127       | <b>1.15</b>   | <b>1.06</b> | -1.03                                  | <b>1.24</b> <i>Srxn1</i>                                                            | sulfiredoxin 1 homolog (S. cerevisiae)                                                                                   |                                                                                                                         |
| NM_001252479//NM_00489366  |               | 0.0276464    |             |              |         | 0.04894       | <b>1.19</b>   | -1.07       | -1.19                                  | <b>1.24</b> <i>Cntm7</i>                                                            | CKLF-like MARVEL transmembrane domain containing 7                                                                       |                                                                                                                         |
| NM_001316372//NM_008796//X |               | 0.03876      |             |              |         | 0.02765       | <b>1.06</b>   | <b>1.08</b> | <b>1.07</b> <b>1.24</b> <i>Pctp</i>    | phosphatidylcholine transfer protein                                                |                                                                                                                          |                                                                                                                         |
| NM_011401//NM_001          |               | 0.0387578    |             |              |         | 0.03876       | <b>1.08</b>   | -1.29       | -1.11                                  | <b>1.23</b> <i>Slc23a3</i>                                                          | solute carrier family 2 (facilitated glucose transporter), member 3                                                      |                                                                                                                         |
| NM_001001009//NM_00357954  |               |              |             |              |         | 0.0358        | <b>1.05</b>   | <b>1.06</b> | <b>1.15</b> <b>1.23</b> <i>Srp54a</i>  | signal recognition particle 54B//signal recognition particle 54B//signal recognitio |                                                                                                                          |                                                                                                                         |
| NM_011189                  |               | 0.0427805    |             |              |         | 0.04278       | <b>1.22</b>   | <b>1.05</b> | <b>1.31</b> <b>1.22</b> <i>Psmc1</i>   | proteasome (prosome, macropain) activator subunit 1 (PA28 alpha)                    |                                                                                                                          |                                                                                                                         |
| NM_001037859//NM_00779//X  |               | 0.0395433    |             |              |         | 0.03954       | <b>1.03</b>   | -1.12       | -1.02                                  | <b>1.22</b> <i>Csf1r</i>                                                            | colony stimulating factor 1 receptor                                                                                     |                                                                                                                         |
| NM_007802//NM_006500974    |               | 0.046115     |             |              |         | 0.04611       | <b>1.08</b>   | <b>1.26</b> | <b>1.04</b> <b>1.21</b> <i>Ctsk</i>    | cathespain K                                                                        |                                                                                                                          |                                                                                                                         |
| NM_02233//NM_001           |               | 1.41E-04     |             |              |         | 0.02233       | -1.56         | -1.12       | -1.09                                  | <b>1.21</b> <i>Hspud1</i>                                                           | homocysteine-inducible, endoplasmic reticulum stress-inducible, ubiquitin-like don                                       |                                                                                                                         |
| NM_025510                  |               | 4.81E-04     |             | 0.0113849    |         | 0.01138       | <b>1.15</b>   | -1.17       | -1.10                                  | <b>1.21</b> <i>Pilo</i>                                                             | paired immunoglobulin-like type 2 receptor alpha                                                                         |                                                                                                                         |
| NM_010550//NM_001          |               | 0.03030509   |             | 0.0411284    |         | 0.04113       | <b>1.20</b>   | -1.20       | -1.20                                  | <b>1.11</b> <i>Irf2</i>                                                             | interleukin 1 receptor, type II                                                                                          |                                                                                                                         |
| NM_181821                  |               | 0.0450951    |             |              |         | 0.0451        | -1.12         | -1.06       | <b>1.01</b> <b>1.20</b> <i>Hcf1r1</i>  | host cell factor C1 regulator 1 (XPO1-dependent)                                    |                                                                                                                          |                                                                                                                         |
| NM_00111015//NM_013681//X  |               | 0.0076582    |             | 0.0071612    |         | 0.00766       | -1.04         | -1.14       | -1.13                                  | <b>1.20</b> <i>Syn2</i>                                                             | synapsin II                                                                                                              |                                                                                                                         |
| NM_001177945//NM_00309111  |               |              |             |              |         | 0.0309        | -1.10         | -1.01       | -1.02                                  | <b>1.19</b> <i>Aardc</i>                                                            | adipogenesis associated Mth938 domain containing                                                                         |                                                                                                                         |
| NM_001286037//NM_00069666  |               |              |             |              |         | 0.0067        | <b>1.45</b>   | <b>1.09</b> | -1.14                                  | <b>1.19</b> <i>Ncf1</i>                                                             | neutrophil cytosolic factor 1                                                                                            |                                                                                                                         |
| NM_008490                  |               | 6.30E-05     |             |              |         | 6.30E-05      | <b>1.01</b>   | -1.12       | -1.03                                  | <b>1.19</b> <i>Lcat</i>                                                             | lecithin cholesterol acyltransferase                                                                                     |                                                                                                                         |
| NM_001113248//NM_00299019  |               |              |             |              |         | 0.0299        | <b>1.29</b>   | <b>1.08</b> | <b>1.00</b> <b>1.19</b> <i>Sin3b</i>   | transcriptional regulator, SIN3 (yeast)                                             |                                                                                                                          |                                                                                                                         |
| NM_001290525//NM_00023673  |               |              |             |              |         | 0.00237       | <b>1.19</b>   | -1.20       | -1.20                                  | <b>1.19</b> <i>Blvrb</i>                                                            | biliverdin reductase B (flavin reductase (NADPH))                                                                        |                                                                                                                         |
| NM_010476//NM_001          |               | 0.0374562    |             |              |         | 0.03746       | <b>1.23</b>   | <b>1.21</b> | <b>1.03</b> <b>1.18</b> <i>Hsd17b7</i> | hydroxysteroid (17-beta) dehydrogenase 7                                            |                                                                                                                          |                                                                                                                         |
| NM_001310705//NM_00397513  |               |              |             |              |         | 0.03975       | -1.20         | -1.13       | -1.14                                  | <b>1.18</b> <i>Slc16a4</i>                                                          | solute carrier family 16 (monocarboxylic acid transporters), member 4                                                    |                                                                                                                         |
| NM_001253751//NM_0006113   |               | 0.0114804    |             |              |         | 0.01148       | <b>1.59</b>   | <b>1.76</b> | <b>1.46</b> <b>1.17</b> <i>Fdps</i>    | farnesyl diphosphate synthetase                                                     |                                                                                                                          |                                                                                                                         |
| NM_009999                  |               | 0.0400147    |             |              |         | 0.04001       | -1.22         | -1.24       | <b>1.26</b> <b>1.17</b> <i>Cyp2b10</i> | cytochrome P450, family 2, subfamily B, polypeptide 10                              |                                                                                                                          |                                                                                                                         |
| NM_028024                  |               | 0.0497831    |             |              |         | 0.04978       | <b>1.15</b>   | <b>1.02</b> | <b>1.03</b> <b>1.17</b> <i>Nkiras2</i> | NFKB inhibitor interacting Ras-like protein 2                                       |                                                                                                                          |                                                                                                                         |

| RefSeq                       | Transcript ID | p Tnfr 24 hr | p Tnfr 48hr | p Tnfr 72 hr | p Nfk1  | ( FD Tnfr 24 hr ( | FD Tnfr 48 hr ( | FD Tnfr 72 hr ( | FD Nfk1 | Gene Symbol                             | Gene Title                                                                                     | Gene Ontology                                                                                                                                                                                                                        |
|------------------------------|---------------|--------------|-------------|--------------|---------|-------------------|-----------------|-----------------|---------|-----------------------------------------|------------------------------------------------------------------------------------------------|--------------------------------------------------------------------------------------------------------------------------------------------------------------------------------------------------------------------------------------|
| NM_008304                    | 0.022382      |              |             |              | 0.02238 | -1.07             | 1.12            | 1.12            | 1.14    | <i>Sdc2</i>                             | syndecan 2                                                                                     | 0007399 // nervous system development // inferred from electronic annotation // 0016477 // cell migration // not rec                                                                                                                 |
| NM_021472//NM_20             | 0.0040024     | 0.0497113    |             |              | 0.04971 | -1.12             | -1.02           | -1.01           | 1.13    | <i>Rnase4</i>                           | ribonuclease, RNase A family 4                                                                 | 0001525 // angiogenesis // inferred from electronic annotation // 0001525 // angiogenesis // -- // 0001525 // angiogenesis                                                                                                           |
| NM_001039373//NM             | 0.0017875     | 0.0108495    | 0.010648    |              | 0.01085 | -1.12             | -1.05           | -1.05           | 1.13    | <i>Cmc4//Mtcp1</i>                      | C-x(9)-C motif containing // mature T cell proliferation 1                                     | 0005739 // mitochondrion // inferred from direct assay // 0005739 // mitochondrion // not recorded                                                                                                                                   |
| NM_00117833//NM              | 0.0479175     |              |             |              | 0.04792 | -1.08             | -1.06           | -1.12           | 1.13    | <i>Smox</i>                             | serpinine oxidase                                                                              | 0006598 // polyamine catabolic process // not recorded // 00046208 // spermine catabolic process // inferred from dir                                                                                                                |
| NM_019814//NM_006512201//X   | 0.0321375     |              |             |              | 0.03214 | -1.03             | 1.11            | 1.04            | 1.12    | <i>Higd1a</i>                           | HIG1 domain family, member 1A                                                                  | 0006810 // transport // inferred from electronic annotation // 00042149 // cellular response to glucose starvation // inf                                                                                                            |
| NM_001039373//NM             | 0.0017875     | 0.0108495    | 0.010648    |              | 0.01085 | -1.12             | -1.05           | -1.05           | 1.12    | <i>Mtcp1//Cmc4</i>                      | mature T cell proliferation 1 // C-x(9)-C motif containing 4                                   | 0005739 // mitochondrion // inferred from direct assay // 0005739 // mitochondrion // not recorded                                                                                                                                   |
| XM_011238903//XM_011238926// | 0.0332051     |              |             |              | 0.03321 | 2.61              | 3.75            | 3.71            | 1.12    | <i>Gm37416//Gm39743//Gm40611//Gm408</i> | predicted gene, 37416 // predicted gene, 39743 // predicted gene, 40611 // predicted gene, 408 | 0006278 // RNA-dependent DNA replication // inferred from electronic annotation // 0008152 // metabolic process // 0000122 // negative regulation of transcription from RNA polymerase II promoter // not recorded // 0001570 // vas |
| NM_008416                    | 0.001622      |              |             |              | 0.00162 | 1.90              | 1.19            | 1.03            | 1.12    | <i>Junb</i>                             | jun B proto-oncogene                                                                           | 0000678 // transcription, DNA-templated // inferred from electronic annotation // 0006355 // regulation of transcript                                                                                                                |
| NM_001289476//NM             | 0.0021963     |              |             |              | 0.0022  | 1.24              | 1.19            | -1.05           | 1.12    | <i>Psmo7</i>                            | proteasome (prosome, macropain) subunit, alpha type 7                                          | 0006508 // proteolysis // inferred from electronic annotation // 0006511 // ubiquitin-dependent protein catabolic pro                                                                                                                |
| NM_011794//NM_006497159//X   | 0.0120047     | 0.0153885    |             |              | 0.012   | -1.20             | 1.09            | 1.16            | 1.12    | <i>Bpnt1</i>                            | biphosphate 3'-nucleotidase 1                                                                  | 0006139 // nucleobase-containing compound metabolic process // not recorded // 0006470 // protein dephosphoryla                                                                                                                      |
| NM_001038587//NM             | 0.0499708     |              |             |              | 0.04997 | 1.31              | 1.19            | 1.09            | 1.12    | <i>Ador</i>                             | adenosine deaminase, RNA-specific                                                              | 0001649 // osteoblast differentiation // inferred from mutant phenotype // 0001701 // in utero embryonic developme                                                                                                                   |
| NM_019777//NM_00             | 0.0031129     |              |             |              | 0.00311 | 1.08              | 1.03            | -1.07           | 1.12    | <i>Ibke</i>                             | inhibitor of kappaB kinase epsilon                                                             | 0006468 // protein phosphorylation // not recorded // 0006974 // cellular response to DNA damage stimulus // infer                                                                                                                   |
| NM_153059//NM_00             | 0.043095      |              |             |              | 0.04305 | 1.03              | -1.04           | -1.14           | 1.14    | <i>Tmem5</i>                            | transmembrane protein 5                                                                        | 0006486 // protein glycosylation // inferred from electronic annotation // 0035269 // protein O-linked mannosylation                                                                                                                 |
| NM_008086                    | 0.00454716    | 0.0028526    |             |              | 0.00285 | -1.00             | -1.12           | -1.06           | 1.10    | <i>Gp1</i>                              | growth arrest specific 1                                                                       | 0002053 // positive regulation of mesenchymal cell proliferation // inferred from mutant phenotype // 0007049 // cell                                                                                                                |
| NM_029796                    | 0.0029807     | 0.0054629    |             |              | 0.00546 | 2.00              | 1.45            | -1.04           | 1.10    | <i>Lrg1</i>                             | leucine-rich alpha-2-glycoprotein 1                                                            | 0001938 // positive regulation of endothelial cell proliferation // inferred from mutant phenotype // 0003511 // posit                                                                                                               |
| NM_001136077//NM             | 0.0211292     |              |             |              | 0.02113 | -1.06             | -1.00           | 1.04            | 1.10    | <i>Emp2</i>                             | nucleotide pyrophosphatase/phosphodiesterase 2                                                 | 0001953 // negative regulation of cell-matrix adhesion // not recorded // 0006629 // lipid metabolic process // infer                                                                                                                |
| NM_010902//NR_131            | 0.0178916     |              |             |              | 0.01789 | -1.17             | 1.13            | 1.15            | 1.10    | <i>Nfe2l2//LOC105244211</i>             | ectonuclear factor, erythroid derived 2, like 2 // uncharacterized LOC105244211                | 0006351 // transcription, DNA-templated // inferred from electronic annotation // 0006355 // regulation of transcript                                                                                                                |
| NM_025912//NM_006500059      | 0.0208285     |              |             |              | 0.02083 | 1.02              | -1.01           | -1.09           | 1.10    | <i>Fam210b</i>                          | family with sequence similarity 210, member B                                                  | 0016020 // membrane // inferred from electronic annotation // 0016021 // integral component of membrane // infer                                                                                                                     |
| NM_007435                    | 0.0338033     |              |             |              | 0.0338  | 1.17              | -1.04           | 1.12            | 1.10    | <i>Abcd1</i>                            | ATP-binding cassette, sub-family D (ALD), member 1                                             | 0006635 // fatty acid beta-oxidation // inferred from mutant phenotype // 0006635 // fatty acid beta-oxidation // not                                                                                                                |
| NM_001101430//NM             | 0.0037818     |              |             |              | 0.00378 | 1.18              | 1.10            | -1.14           | 1.10    | <i>Psmg4</i>                            | proteasome (prosome, macropain) assembly chaperone 4                                           | 0043248 // proteasome assembly // inferred from electronic annotation                                                                                                                                                                |
| NM_020906//NM_133908//XR_8   | 0.026953      | 0.0095988    |             |              | 0.02695 | 1.04              | -1.12           | -1.10           | 1.10    | <i>Rito1//Gm38465</i>                   | RBP1 interacting and tubulin associated 1 // predicted gene, 38465                             | 0007219 // Notch signaling pathway // inferred from electronic annotation // 0007399 // nervous system development                                                                                                                   |
| NM_145156//NM_006527097//X   | 0.0138662     |              |             |              | 0.01386 | 1.12              | -1.09           | -1.11           | 1.10    | <i>Slc25a28</i>                         | solute carrier family 25, member 28                                                            | 0006810 // transport // inferred from electronic annotation // 0006811 // ion transport // inferred from electronic an                                                                                                               |
| NM_175309                    | 0.0163726     |              |             |              | 0.01637 | 1.05              | -1.14           | 1.18            | 1.09    | <i>Upk3b</i>                            | uroplakin 3B                                                                                   | 0010629 // negative regulation of gene expression // not recorded // 00046325 // negative regulation of glucose import                                                                                                               |
| NM_00116769//NM              | 0.0088986     |              |             |              | 0.0089  | 1.11              | 1.01            | -1.11           | 1.09    | <i>Lmo4</i>                             | LIM domain only 4                                                                              | 0001843 // neural tube closure // inferred from mutant phenotype // 0003281 // ventricular septum development // li                                                                                                                  |
| NM_001177594//NM_001177595   | 0.0282329     |              |             |              | 0.02823 | -1.01             | -1.10           | 1.04            | 1.09    | <i>Slc8b1</i>                           | solute carrier family 8 (sodium/lithium/calcium exchanger), member 81                          | 0006810 // transport // inferred from electronic annotation // 0006811 // ion transport // inferred from electronic an                                                                                                               |
| NM_024432//NM_006524796      | 0.0342473     |              |             |              | 0.03425 | 1.02              | -1.11           | -1.08           | 1.09    | <i>Ubxm6</i>                            | UBX domain protein 6                                                                           | 0005634 // nucleus // not recorded // 0005730 // nucleus // not recorded // 0005737 // cytoplasm // inferred from e                                                                                                                  |
| NM_021789//XR_870            | 0.0358103     | 0.0389616    |             |              | 0.03896 | -1.07             | -1.10           | -1.14           | 1.08    | <i>Trappc4</i>                          | trafficking protein particle complex 4                                                         | 0006810 // transport // inferred from electronic annotation // 0006888 // ER to Golgi vesicle-mediated transport // no                                                                                                               |
| NM_001314013//NM_0530669//X  | 0.0303102     | 0.0273162    |             |              | 0.03031 | 1.06              | 1.10            | 1.15            | 1.07    | <i>Atg5</i>                             | autophagy related 5                                                                            | 0000045 // autophagosome assembly // inferred from mutant phenotype // 0000422 // mitophagy // not recorded //                                                                                                                       |
| NM_001045544//NM             | 0.0013916     |              |             |              | 0.00139 | 1.28              | -1.18           | -1.07           | 1.07    | <i>Akna</i>                             | AT-hook transcription factor                                                                   | 0006351 // transcription, DNA-templated // inferred from electronic annotation // 0006355 // regulation of transcript                                                                                                                |
| NM_008344                    | 0.0206806     | 0.0259694    |             |              | 0.02597 | 1.09              | -1.19           | -1.07           | 1.06    | <i>Igf6p6</i>                           | insulin-like growth factor binding protein 6                                                   | 0001558 // regulation of cell growth // inferred from electronic annotation // 0043567 // regulation of insulin-like gro                                                                                                             |
| NM_053159                    | 0.0137382     | 9.06E-04     |             |              | 0.01373 | 1.13              | -1.13           | -1.01           | 1.06    | <i>Mrp13</i>                            | mitochondrial ribosomal protein L3                                                             | 0006412 // translation // not recorded                                                                                                                                                                                               |
| NM_001291503//NM             | 0.0243809     |              |             |              | 0.02438 | -1.17             | -1.05           | 1.07            | 1.06    | <i>Birc2</i>                            | baculoviral IAP repeat-containing 2                                                            | 0002029 // protein polyubiquitination // not recorded // 0001666 // response to hypoxia // not recorded // 0001890 //                                                                                                                |
| NM_007621//NM_00             | 0.0096765     | 0.0158171    |             |              | 0.01582 | -1.03             | -1.10           | 1.26            | 1.05    | <i>Cbr2</i>                             | carboxyl reductase 2                                                                           | 0006116 // NADH oxidation // traceable author statement // 0008152 // metabolic process // 0001890 //                                                                                                                                |
| NM_153516//NM_00             | 0.0107404     |              |             |              | 0.01074 | 1.12              | 1.11            | 1.07            | 1.05    | <i>Bcl2l13</i>                          | BCL2-like 13 (apoptosis facilitator)                                                           | 0006915 // apoptotic process // inferred from reviewed computational analysis // 0042981 // regulation of apoptotic i                                                                                                                |
| NM_009052//NM_00             | 0.0017031     |              |             |              | 0.00107 | 1.40              | 1.06            | 1.08            | 1.05    | <i>Rasa3</i>                            | RAS p21 protein activator 3                                                                    | 0007165 // signal transduction // inferred from electronic annotation // 0034605 // cellular response to heat // not rec                                                                                                             |
| NM_001248                    | 0.0389777     | 0.03898      |             |              | 0.03898 | 1.06              | 1.12            | 1.09            | 1.05    | <i>Lamtor2</i>                          | late endosomal/lysosomal adaptor, MAPK and MTOR activator 2                                    | 0001886 // activation of MAPK activity // inferred from direct assay // 0016049 // cell growth // not recorded // 00032                                                                                                              |
| NM_023232                    | 0.0192033     |              |             |              | 0.0192  | 1.06              | 1.13            | 1.05            | 1.13    | <i>Diablo</i>                           | diablo homolog (Drosophila)                                                                    | 0006915 // apoptotic process // inferred from electronic annotation // 0006919 // activation of cysteine-type endopep                                                                                                                |
| NM_026124                    | 0.0058328     |              |             |              | 0.00583 | 1.15              | -1.03           | -1.07           | 1.04    | <i>1110008F13Rik</i>                    | RIKEN cDNA 1110008F13 gene                                                                     | 0005739 // mitochondrion // inferred from direct assay                                                                                                                                                                               |
| NM_011512//NM_00             | 0.0020724     |              |             |              | 0.00207 | 1.10              | 1.05            | 1.18            | 1.03    | <i>Surf1</i>                            | surflet gene 4                                                                                 | 0007030 // Golgi organization // not recorded // 0010638 // positive regulation of organelle organization // not recor                                                                                                               |
| NM_031381//NM_01             | 0.0018739     |              |             |              | 0.00187 | -1.13             | -1.11           | -1.02           | 1.03    | <i>Tax13</i>                            | testis expressed gene 13                                                                       | 0006915 // apoptotic process // inferred from electronic annotation // 0006919 // activation of cysteine-type endopep                                                                                                                |
| NM_139197//NM_006497918//X   | 0.0320381     |              |             |              | 0.03204 | 1.00              | -1.20           | -1.14           | 1.03    | <i>Gbp1</i>                             | globoside alpha-1,3-N-acetylgalactosaminyltransferase 1                                        | 0005975 // carbohydrate metabolic process // inferred from electronic annotation // 0006486 // protein glycosylation                                                                                                                 |
| NM_175263//NM_006534494//X   | 0.0257043     | 0.0320829    |             |              | 0.0257  | -1.03             | -1.26           | -1.16           | 1.03    | <i>Notum</i>                            | notum pectinacetyltransferase homolog (Drosophila)                                             | 0006507 // GPI anchor release // inferred from direct assay // 0016055 // Wnt signaling pathway // inferred from elc                                                                                                                 |
| NM_001206367//NM             | 0.0299643     |              |             |              | 0.02996 | -1.21             | -1.21           | -1.01           | 1.02    | <i>Gsn</i>                              | gelsolin                                                                                       | 0006911 // phagocytosis, engulfment // inferred from mutant phenotype // 0006915 // apoptotic process // not recor                                                                                                                   |
| NM_001037940//NM_01037941    | 0.0184684     |              |             |              | 0.01847 | -1.06             | -1.08           | 1.05            | 1.02    | <i>Onaj6</i>                            | DnaI (Hsp40) homolog, subfamily B, member 6                                                    | 0006457 // protein folding // not recorded // 0030036 // actin cytoskeleton organization // inferred from mutant ph                                                                                                                  |
| NM_145513//NM_00             | 0.0471327     |              |             |              | 0.04713 | -1.07             | 1.04            | 1.12            | 1.01    | <i>Tjpr1</i>                            | TIP41, TOR signalling pathway regulator-like (S. cerevisiae)                                   | 0000077 // DNA damage checkpoint // not recorded // 0034048 // negative regulation of protein phosphatase type 2                                                                                                                     |
| NM_001290437//NM_033134//X   | 0.0400683     | 0.0426836    |             |              | 0.04007 | -1.01             | -1.03           | 1.01            | 1.01    | <i>Inpp5e</i>                           | inositol polyphosphatase 5-phosphatase E                                                       | 0006470 // transport // inferred from direct assay // 0006470 // protein dephosphorylation // infer                                                                                                                                  |
| NM_001048057//NM_001048058   | 0.0323493     |              |             |              | 0.03235 | -1.01             | 1.10            | 1.04            | 1.01    | <i>Rpl38</i>                            | ribosomal protein L38                                                                          | 0001501 // skeletal system development // inferred from mutant phenotype // 0001501 // skeletal system developme                                                                                                                     |
| NM_053068                    | 0.0047056     |              |             |              | 0.00471 | 1.21              | 1.02            | 1.02            | 1.01    | <i>Chrac1</i>                           | chromatin accessibility complex 1                                                              | 0008152 // metabolic process // inferred from electronic annotation // 0071897 // DNA biosynthetic process // infer                                                                                                                  |
| NM_008403//NM_00             | 0.0161564     |              |             |              | 0.01616 | 1.14              | 1.08            | -1.02           | -1.01   | <i>Ihg1b1p1</i>                         | integrin beta 1 binding protein 1                                                              | 0001525 // angiogenesis // inferred from electronic annotation // 0002043 // blood vessel endothelial cell proliferation                                                                                                             |
| NM_013536                    | 0.0155215     | 0.0396649    |             |              | 0.03966 | 1.12              | 1.18            | 1.21            | -1.01   | <i>Emp1</i>                             | EMG1 nuclear protein homolog (S. cerevisiae)                                                   | 0001824 // blastocyst development // inferred from mutant phenotype // 0006364 // rRNA processing // inferred from                                                                                                                   |
| NM_145404//NM_00             | 0.0270387     |              |             |              | 0.02704 | 1.08              | 1.03            | -1.04           | -1.01   | <i>Prrt7</i>                            | protein arginine N-methyltransferase 7                                                         | 0000387 // spliceosomal snRNP assembly // not recorded // 0006349 // regulation of gene expression by genetic imp                                                                                                                    |
| NM_001033201                 | 0.0271104     |              |             |              | 0.02711 | 1.03              | 1.12            | 1.05            | -1.02   | <i>Ncbp1</i>                            | nuclear cap binding protein subunit 1                                                          | 0000184 // nuclear-transcribed mRNA catabolic process, nonsense-mediated decay // not recorded // 0006370 // 7-m                                                                                                                     |
| NM_026113//NM_00             | 0.0459785     | 0.0056938    |             |              | 0.00569 | 1.14              | 1.30            | 1.08            | -1.02   | <i>Gtf3c6</i>                           | general transcription factor IIIc, polypeptide 6, alpha                                        | 0006351 // transcription, DNA-templated // not recorded // 0006383 // transcription from RNA polymerase III promot                                                                                                                   |
| NM_026526//NM_00             | 0.0444804     | 0.0311002    |             |              | 0.0311  | 1.06              | 1.11            | -1.02           | -1.02   | <i>N6amt2</i>                           | N-6 adenine-specific DNA methyltransferase 2 (putative)                                        | 0032259 // methylation // inferred from electronic annotation                                                                                                                                                                        |
| NM_030109//NM_006531771      | 0.0383358     |              |             |              | 0.03834 | 1.03              | 1.09            | 1.21            | -1.02   | <i>Sfb3b</i>                            | splicing factor 3b, subunit 2                                                                  | 0000398 // mRNA splicing, via spliceosome // not recorded                                                                                                                                                                            |
| NM_025919//NM_00             | 0.0015412     |              |             |              | 0.00154 | 1.22              | 1.15            | 1.04            | -1.02   | <i>Rpl11</i>                            | ribosomal protein L11                                                                          | 0000027 // ribosomal large subunit assembly // -- // 0006364 // rRNA processing // not recorded // 0006412 // trans                                                                                                                  |
| NM_001159354//NM             | 0.0272379     | 0.039371     |             |              | 0.03937 | 1.44              | 1.40            | 1.47            | -1.03   | <i>Magi3</i>                            | membrane associated guanylate kinase, WW and PDZ domain containing 3                           | 0007165 // signal transduction // inferred from electronic annotation // 0016310 // phosphorylation // inferred from e                                                                                                               |
| NM_001166506//NM             | 0.0202679     |              |             |              | 0.02027 | -1.18             | -1.02           | 1.06            | -1.02   | <i>Sec14l1</i>                          | SEC14-like lipid binding 1                                                                     | 0006810 // transport // inferred from electronic annotation                                                                                                                                                                          |
| NM_018874                    | 0.0080419     | 0.0112728    |             |              | 0.01127 | -1.04             | -1.06           | 1.01            | -1.03   | <i>Plnpp1</i>                           | pancreatic lipase related protein 2A                                                           | 0006629 // lipid metabolic process // inferred from electronic annotation                                                                                                                                                            |
| NM_008409                    | 0.0482514     |              |             |              | 0.04825 | 1.13              | 1.11            | 1.12            | -1.03   | <i>Htm2a</i>                            | integral membrane protein 2A                                                                   | 0005515 // protein binding // inferred from electronic annotation                                                                                                                                                                    |
| NM_001110251//NM             | 0.0225508     |              |             |              | 0.02251 | 1.24              | 1.20            | 1.01            | -1.04   | <i>Hmb5</i>                             | hydroxymethylbilane synthase                                                                   | 0001666 // response to hypoxia // inferred from electronic annotation // 0006779 // porphyrin-containing compound                                                                                                                    |
| NM_001102455//NM             | 0.0055096     |              |             |              | 0.00551 | -1.06             | 1.10            | 1.10            | 1.10    | <i>Aplp2</i>                            | amyloid beta (A4) precursor-like protein 2                                                     | 0001967 // sucking behavior // inferred from genetic interaction // 0006878 // cellular copper ion homeostasis // infe                                                                                                               |
| NM_011483//NM_00             | 0.0106377     |              |             |              | 0.01064 | 1.09              | 1.20            | 1.20            | -1.04   | <i>LOC100862468//Nhp21</i>              | NHP2-like protein 1 // NHP2 non-histone chromosome protein 2-like 1 (S. cerevisiae)            | 0006397 // mRNA processing // inferred from electronic annotation // 0007338 // single fertilization // inferred from c                                                                                                              |
| NM_026030                    | 0.02303       | 0.0230266    |             |              | 0.02303 | 1.01              | 1.10            | 1.01            | -1.04   | <i>Ejfs2</i>                            | eukaryotic translation initiation factor 2, subunit 2 (beta)                                   | 0001701 // in utero embryonic development // inferred from mutant phenotype // 0002216 // male germ cell prolifer                                                                                                                    |
| NM_001098277//NM             | 0.0280175     |              |             |              | 0.02807 | -1.01             | 1.14            | 1.09            | -1.05   | <i>Sd19p</i>                            | syndecan binding protein 1                                                                     | 0007265 // Ras protein signal transduction // inferred from physical interaction // 0007266 // synaptic transmission //                                                                                                              |
| NM_001033481//NM             | 0.0375939     |              |             |              | 0.03759 | -1.12             | 1.01            | 1.09            | -1.05   | <i>Myp1</i>                             | myelin regulatory factor                                                                       | 0006351 // transcription, DNA-templated // inferred from electronic annotation // 0006355 // regulation of transcript                                                                                                                |
| NM_001081392//NM_133874//X   | 0.0393782     |              |             |              | 0.03938 | -1.03             | 1.02            | -1.05           | -1.05   | <i>Mdn1</i>                             | midasin homolog (yeast)                                                                        | 0                                                                                                                                                                                                                                    |

| RefSeq                                 | Transcript ID | p Tnfr 24 hr | p Tnfr 48hr | p Tnfr 72 hr | p Nfk1b | ( FD Tnfr 24 hr | ( FD Tnfr 48 hr | ( FD Tnfr 72 hr | ( FD Nfk1b | Gene Symbol                     | Gene Title                                                                        | Gene Ontology                                                                                                           |
|----------------------------------------|---------------|--------------|-------------|--------------|---------|-----------------|-----------------|-----------------|------------|---------------------------------|-----------------------------------------------------------------------------------|-------------------------------------------------------------------------------------------------------------------------|
| NM_145940                              |               | 0.0444011    | 0.0444      | -1.03        | -1.07   | 1.02            | -1.07           | 1.02            | -1.07      | <i>Wip1</i>                     | WD repeat domain, phosphoinositide interacting 1                                  | 0000045 // autophagosome assembly // not recorded//0000422 // mitophagy // not recorded//0006497 // protein             |
| NM_019447//XM_0010164451               |               | 0.016451     | 0.01645     | -1.17        | -1.16   | 1.03            | -1.07           | 1.03            | -1.07      | <i>Hgfoc</i>                    | hepatocyte growth factor activator                                                | 0006508 // proteolysis // inferred from electronic annotation                                                           |
| NM_0110172                             |               | 0.0362128    | 1.26        | 1.05         | -1.13   | -1.07           | -1.07           | 1.05            | -1.07      | <i>Pfn1</i>                     | profilin 1                                                                        | 0001843 // neural tube closure // inferred from genetic interaction//0006357 // regulation of transcription from RNA    |
| NM_001110310//NM_001110311, 0.0153699  |               | 0.01537      | 1.03        | 1.08         | 1.06    | -1.07           | -1.07           | 1.08            | 1.06       | <i>Snx12</i>                    | sorting nexin 12                                                                  | 0006810 // transport // inferred from electronic annotation//0006899 // endocytosis // not recorded//0010629 // r       |
| NM_008638//XM_001030243, 0.0035288     |               | 0.00353      | 1.09        | 1.12         | -1.14   | -1.07           | -1.07           | 1.12            | -1.14      | <i>Mthfd2</i>                   | methylene-tetrahydrofolate dehydrogenase (NAD-dependent), methylenetetrahydr      | 0006730 // one-carbon metabolic process // not recorded//0008152 // metabolic process // inferred from electronic       |
| NM_011952                              |               | 0.0407381    | 1.00        | 1.07         | 1.21    | -1.07           | -1.07           | 1.07            | 1.21       | <i>Mapk3</i>                    | mitogen-activated protein kinase 3                                                | 0000165 // MAPK cascade // not recorded//0000189 // MAPK import into nucleus // not recorded//0001934 // posi           |
| NM_001252332//NM_001033312             |               | 0.03331      | 1.02        | 1.18         | 1.16    | -1.07           | -1.07           | 1.18            | 1.16       | <i>8-Sep</i>                    | septin 8                                                                          | 0000166 // nucleotide binding // inferred from electronic annotation//0005515 // protein binding // inferred from ete   |
| NM_019426//XM_001066639                |               | 0.01666      | 1.31        | -1.02        | 1.06    | -1.07           | -1.07           | 1.31            | -1.02      | <i>Atf7ip</i>                   | activating transcription factor 7 interacting protein                             | 0000122 // negative regulation of transcription from RNA polymerase II promoter // inferred from direct assay//000      |
| NM_009503                              |               | 0.0176248    | 0.01762     | 1.19         | 1.13    | 1.00            | -1.07           | 1.19            | 1.13       | <i>Vcp</i>                      | valosin containing protein                                                        | 0006281 // DNA repair // inferred from electronic annotation//0006302 // double-strand break repair // not recorde      |
| NM_010617//XM_006516861//X, 0.0273545  |               | 0.02735      | -1.08       | 1.13         | 1.10    | -1.08           | -1.08           | 1.13            | 1.10       | <i>Kif13a</i>                   | kinesin family member 13A                                                         | 0000910 // cytokinesis // not recorded//0006810 // transport // inferred from electronic annotation//0006886 // in      |
| NM_001145034                           |               | 0.0461378    | 1.29        | -1.21        | -1.20   | -1.08           | -1.08           | 1.29            | -1.21      | <i>Gm13889</i>                  | predicted gene 13889                                                              |                                                                                                                         |
| NM_029416//XM_0010297776               | 0.030468      | 0.0099994    | 0.03047     | -1.06        | -1.04   | -1.18           | -1.08           | 1.07            | -1.18      | <i>Klf17</i>                    | Kruppel-like factor 17                                                            | 0000122 // negative regulation of transcription from RNA polymerase II promoter // inferred from direct assay//0006     |
| NM_009226                              |               | 0.0290011    | 0.029       | 1.15         | 1.53    | 1.17            | -1.08           | 1.15            | 1.53       | <i>Snrpd1</i>                   | small nuclear ribonucleoprotein D1                                                | 0000245 // spliceosomal complex assembly // not recorded//0000387 // spliceosomal snRNP assembly // not recorde         |
| NM_019427//XM_001022712                |               | 0.022712     | 0.02271     | -1.20        | -1.11   | 1.15            | -1.08           | 1.15            | -1.11      | <i>Eps1144b</i>                 | erythrocyte membrane protein band 4.1 like 4b                                     | 0010628 // positive regulation of gene expression // not recorded//0031032 // actomyosin structure organization // i    |
| NM_025578                              |               | 0.0099199    | 0.00992     | -1.02        | -1.12   | 1.00            | -1.08           | 1.00            | -1.12      | <i>Mpsp25</i>                   | mitochondrial ribosomal protein S25                                               | 0032543 // mitochondrial translation // inferred by curator                                                             |
| NM_001039184//NM_001031606             |               | 0.03166      | 0.03161     | -1.23        | -1.02   | 1.16            | -1.09           | 1.16            | -1.09      | <i>Cpsp20</i>                   | centrosomal protein 350                                                           | 0034453 // microtubule anchoring // inferred from electronic annotation                                                 |
| NM_023773//XM_006519640//X, 0.042539   | 0.0209159     | 0.04254      | -1.02       | -1.05        | -1.11   | -1.09           | -1.09           | 1.02            | -1.05      | <i>Aphosphp8</i>                | M-phase phosphoprotein 8                                                          | 0006351 // transcription, DNA-templated // inferred from electronic annotation//0006355 // regulation of transcripti    |
| NM_001190804//NM_001190805, 0.0188629  |               | 0.01886      | -1.06       | 1.23         | -1.03   | -1.09           | -1.09           | 1.23            | -1.03      | <i>Dnajp11</i>                  | Dnaj (Hsp40) homolog, subfamily B, member 11                                      | 0006457 // protein folding // inferred from electronic annotation//0016556 // mRNA modification // inferred from di     |
| NM_001081196//NM_0104187               |               | 0.01482      | -1.12       | 1.02         | 1.18    | -1.09           | -1.09           | 1.18            | -1.09      | <i>Hnrnpul2</i>                 | heterogeneous nuclear ribonucleoprotein U-like 2                                  | 0005515 // protein binding // inferred from physical interaction//0044822 // poly(A) RNA binding // not recorde         |
| NM_001163662//NM_00439748              |               | 0.04397      | -1.11       | 1.03         | 1.07    | -1.09           | -1.09           | 1.03            | 1.07       | <i>Nucb1</i>                    | nucleobindin 1                                                                    | 0072718 // response to cisplatin // inferred from electronic annotation//1903533 // regulation of protein targeting //  |
| NM_001306143//NM_0038381               |               | 0.03838      | 1.13        | 1.09         | -1.17   | -1.10           | -1.10           | 1.13            | 1.09       | <i>Mbd3</i>                     | methyl-CpG binding domain protein 3                                               | 0000122 // negative regulation of transcription from RNA polymerase II promoter // inferred from direct assay//0001     |
| NM_001081144//NM_0006173               |               | 0.00617      | -1.10       | -1.06        | -1.10   | -1.10           | -1.10           | 1.10            | -1.10      | <i>Zfp518b</i>                  | zinc finger protein 518B                                                          | 0006351 // transcription, DNA-templated // inferred from electronic annotation//0006355 // regulation of transcripti    |
| NM_001305284//NM_00350286, 0.0499463   |               | 0.04995      | -1.28       | 1.09         | 1.06    | -1.10           | -1.10           | 1.09            | 1.06       | <i>Mpdz</i>                     | multiple PDZ domain protein                                                       | 0007155 // cell adhesion // inferred from direct assay//0042552 // myelination // not recorded                          |
| NM_001161782//NM_001041009             |               | 0.04101      | -1.22       | -1.09        | 1.13    | -1.10           | -1.10           | 1.13            | -1.10      | <i>Trim32</i>                   | tripartite motif-containing 32                                                    | 0002029 // protein polyubiquitination // not recorded//0001894 // tissue homeostasis // inferred from mutant phen       |
| NM_026514//XM_006524295                | 0.003048      | 0.00305      | -1.08       | -1.24        | -1.08   | -1.10           | -1.10           | 1.08            | -1.24      | <i>Cdc42ep3</i>                 | CDC42 effector protein (Rho GTPase binding) 3                                     | 0007266 // Rho protein signal transduction // not recorded//0008360 // regulation of cell shape // not recorded//00     |
| NM_010485//XM_006508698                | 0.0330496     | 0.03305      | -1.02       | 1.20         | 1.15    | -1.10           | -1.10           | 1.20            | 1.15       | <i>Elav1</i>                    | ELAV (embryonic lethal, abnormal vision)-like 1 (Hu antigen R)                    | 0006417 // regulation of translation // not recorded//0045727 // positive regulation of translation // inferred from di |
| NM_144918                              |               | 0.0236148    | 0.012548    | 1.14         | 1.10    | -1.00           | -1.10           | 1.14            | 1.10       | <i>Smyd5</i>                    | SET and MYND domain containing 5                                                  | 0032259 // methylation // inferred from electronic annotation                                                           |
| NM_133933                              |               | 0.01294      | 0.0129      | -1.06        | 1.18    | -1.12           | -1.10           | 1.18            | -1.12      | <i>Rpn1</i>                     | ribophorin 1                                                                      | 0006486 // protein glycosylation // inferred from electronic annotation//0018279 // protein N-linked glycosylation vi   |
| NM_172015//XM_006516826                | 0.0330718     | 0.03307      | -1.05       | 1.08         | 1.02    | -1.10           | -1.10           | 1.08            | 1.02       | <i>Iars</i>                     | isoleucine-tRNA synthetase                                                        | 0001649 // osteoblast differentiation // not recorded//0006412 // translation // inferred from electronic annotation//  |
| NM_133895//XM_006504271//X, 0.0200086  |               | 0.02001      | -1.04       | 1.14         | 1.08    | -1.10           | -1.10           | 1.14            | 1.08       | <i>Slc15a4</i>                  | solute carrier family 15, member 4                                                | 0006810 // transport // inferred from electronic annotation//0006657 // oligopeptide transport // inferred from elec    |
| NM_001163513//NM_0039438               | 0.0068113     | 0.03944      | 1.09        | 1.22         | 1.22    | -1.10           | -1.10           | 1.22            | 1.22       | <i>Dlg5</i>                     | discs, large homolog 5 (Drosophila)                                               | 0006461 // protein complex assembly // inferred from mutant phenotype//0003089 // polarized epithelial cell differe     |
| NM_134010//XM_006513018                | 0.0363082     | 0.03631      | 1.09        | 1.12         | 1.08    | -1.11           | -1.11           | 1.09            | 1.12       | <i>Nup107</i>                   | nucleoporin 107                                                                   | 0000973 // posttranscriptional tethering of RNA polymerase II gene DNA at nuclear periphery // --//0006355 // regul     |
| NM_001286040//NM_0015112               |               | 0.01511      | -1.15       | -1.12        | 1.00    | -1.11           | -1.11           | 1.00            | -1.11      | <i>Anks1</i>                    | ankyrin repeat and SAM domain containing 1                                        | 0006929 // substrate-dependent cell migration // inferred from direct assay//0016322 // neuron remodeling // infer      |
| NM_011966//XM_001260604                | 0.0334973     | 2.60E-04     | 1.20        | 1.36         | 1.21    | -1.11           | -1.11           | 1.20            | 1.36       | <i>Psmo4</i>                    | proteasome (prosome, macropain) subunit, alpha type 4                             | 0006508 // proteolysis // inferred from electronic annotation//0006511 // ubiquitin-dependent protein catabolic pro     |
| NM_00113470//NM_146012                 | 0.0247841     | 0.02478      | 1.16        | 1.03         | 1.04    | -1.11           | -1.11           | 1.16            | 1.03       | <i>Ctdsp2</i>                   | CTD (carboxy-terminal domain, RNA polymerase II, polypeptide A) small phosphat    | 0001933 // negative regulation of protein phosphorylation // inferred from direct assay//0006470 // protein dephos      |
| NM_001290486//NM_0103366//N, 0.0072765 |               | 0.00728      | -1.21       | 1.06         | -1.06   | -1.11           | -1.11           | 1.06            | -1.06      | <i>Lpar1</i>                    | lyso-phosphatidic acid receptor 1                                                 | 0000187 // activation of MAPK activity // inferred from direct assay//0007165 // signal transduction // inferred from   |
| NM_001311790//NM_0099822//X, 0.0318398 | 0.0362418     | 0.03184      | 1.09        | 1.20         | 1.14    | -1.11           | -1.11           | 1.09            | 1.20       | <i>Ctsc</i>                     | cathepsin C                                                                       | 0001913 // T cell mediated cytotoxicity // inferred from genetic interaction//0006508 // proteolysis // inferred from   |
| NM_009538                              |               | 0.0410006    | 0.04104     | -1.44        | -1.10   | -1.13           | -1.11           | 1.44            | -1.10      | <i>Plagl1</i>                   | pliomorphic adenoma gene-like 1                                                   | 0006351 // transcription, DNA-templated // inferred from electronic annotation//0006357 // regulation of transcripti    |
| XR_378553//NR_040558//XR_862           | 0.030526      | 0.03053      | -1.18       | -1.18        | -1.04   | -1.11           | -1.11           | 1.18            | -1.18      | <i>1500002F19RIK</i>            | RIKEN cDNA 1500002F19 gene                                                        |                                                                                                                         |
| NM_00763//XM_001026375                 | 0.0214593     | 0.02146      | 1.03        | 1.15         | 1.08    | -1.11           | -1.11           | 1.03            | 1.15       | <i>Ctcs1</i>                    | chaperonin containing Tcp1, subunit 5 (epsilon)                                   | 0006457 // protein folding // inferred from electronic annotation//0007339 // binding of sperm to zona pellucida // i   |
| NM_007591                              |               | 0.0175542    | 0.01755     | -1.11        | 1.25    | 1.22            | -1.11           | 1.25            | 1.22       | <i>Calr</i>                     | calreticulin                                                                      | 0000122 // negative regulation of transcription from RNA polymerase II promoter // not recorded//0002502 // pepti       |
| NM_132942//XM_0010158775               | 0.015887      | 0.01588      | -1.14       | 1.11         | 1.07    | -1.11           | -1.11           | 1.11            | 1.07       | <i>Plekha1</i>                  | pleckstrin homology domain containing, family A (phosphoinositide binding specifi | 0001553 // ubiquitination // inferred from genetic interaction//0007283 // spermatogenesis // inferred from mutan       |
| NM_001039351//NM_001039352, 0.0012504  |               | 0.00125      | 1.07        | 1.24         | 1.30    | -1.12           | -1.12           | 1.07            | 1.24       | <i>Nok1</i>                     | nucleolar and colled-body phosphoprotein 1                                        | 0007000 // nucleolus organization // inferred from direct assay                                                         |
| NM_026554                              |               | 0.0129665    | 0.01297     | -1.01        | 1.26    | 1.16            | -1.12           | 1.26            | 1.16       | <i>Ncbp2</i>                    | nuclear cap binding protein subunit 2                                             | 0000184 // nuclear-transcribed mRNA catabolic process, nonsense-mediated decay // not recorded//0000399 // mR           |
| NM_011594                              |               | 0.0493615    | 0.04936     | 1.02         | 1.08    | 1.13            | -1.12           | 1.02            | 1.08       | <i>Temp</i>                     | tissue inhibitor of metalloproteinase 2                                           | 0007417 // central nervous system development // inferred from electronic annotation//0007568 // aging // inferre       |
| NM_017376//NM_15_00071118              | 0.0109324     | 0.01093      | 1.11        | 1.11         | 1.14    | -1.12           | -1.12           | 1.11            | 1.14       | <i>Tcfp2</i>                    | thyrotroph embryonic factor 2                                                     | 0006351 // transcription, DNA-templated // inferred from electronic annotation//0006355 // regulation of transcripti    |
| NM_011119                              |               | 0.035631     | 0.03563     | 1.08         | 1.01    | 1.17            | -1.12           | 1.08            | 1.01       | <i>Pa2g4</i>                    | proliferation-associated 264                                                      | 0006351 // transcription, DNA-templated // inferred from electronic annotation//0006355 // regulation of transcripti    |
| NM_198885//XM_0010320757               | 0.03208       | 0.03208      | -1.04       | 1.01         | -1.07   | -1.13           | -1.13           | 1.01            | -1.07      | <i>Scx</i>                      | scleraxis                                                                         | 0001707 // mesoderm formation // inferred from mutant phenotype//0001894 // tissue homeostasis // inferred from         |
| NM_001080126//NM_00209222              | 0.02092       | 0.02092      | 1.24        | 1.15         | 1.17    | -1.13           | -1.13           | 1.24            | 1.15       | <i>Casp8</i>                    | caspase 8                                                                         | 0001525 // angiogenesis // inferred from mutant phenotype//0001841 // neural tube formation // inferred from mut        |
| NM_001253857//NM_00490024              | 0.049         | 0.049        | -1.09       | -1.11        | -1.09   | -1.13           | -1.13           | 1.09            | -1.11      | <i>Tet1</i>                     | tet methylcytosine dioxygenase 1                                                  | 0001826 // inner cell mass cell differentiation // inferred from mutant phenotype//0006351 // transcription, DNA-tem    |
| NM_001177371//NM_001174665             | 0.01175       | 0.01175      | 1.09        | -1.07        | -1.12   | -1.13           | -1.13           | 1.09            | -1.07      | <i>Dbn1</i>                     | drebrin 1                                                                         | 0007015 // actin filament organization // inferred from direct assay//0007275 // multicellular organismal developme     |
| NM_001290817//NM_009242                | 0.0465537     | 0.04655      | -1.15       | 1.02         | 1.00    | -1.13           | -1.13           | 1.02            | 1.00       | <i>Sparc</i>                    | secreted acidic cysteine rich glycoprotein                                        | 0001503 // ossification // inferred from electronic annotation//0001937 // negative regulation of endothelial cell pro  |
| NM_001290696//NM_00054834              | 0.00548       | 0.00548      | -1.04       | 1.02         | 1.05    | -1.13           | -1.13           | 1.02            | 1.05       | <i>Foxj3</i>                    | forkhead box J3                                                                   | 0006351 // transcription, DNA-templated // inferred from electronic annotation//0006355 // regulation of transcripti    |
| NM_018826                              |               | 0.0260593    | 0.02606     | -1.10        | -1.27   | -1.14           | -1.14           | 1.10            | -1.27      | <i>Irx5</i>                     | Iroquois related homeobox 5 (Drosophila)                                          | 0002027 // regulation of heart rate // inferred from mutant phenotype//0006351 // transcription, DNA-templated //       |
| NM_001040690//NM_00455639              | 0.04556       | 0.04556      | 1.04        | 1.17         | 1.14    | -1.14           | -1.14           | 1.04            | 1.17       | <i>Rap1gds1</i>                 | RAP1, GTP-GDP dissociation stimulator 1                                           | 0000060 // small import into nucleus, translocation // not recorded//0006606 // protein import into nucleus // infe     |
| NM_026532//NR_033574//X, 0.0396536     | 0.02483       | 0.02483      | 1.02        | 1.22         | 1.29    | -1.14           | -1.14           | 1.02            | 1.22       | <i>Nut2//Nut2-ps1//Nut2-ps2</i> | nuclear transport factor 2//nuclear transport factor 2, pseudogene 1//nuclear tr  | 0005515 // protein binding // inferred from electronic annotation                                                       |
| NM_001168672//NM_001411733             | 0.04117       | 0.04117      | -1.03       | -1.04        | -1.05   | -1.14           | -1.14           | 1.03            | -1.04      | <i>Gtse1</i>                    | G two 5 phase expressed protein 1                                                 | 0006508 // proteolysis // inferred from electronic annotation//0008283 // cell proliferation // not recorded//00164     |
| NM_001291818//NM_00134002              | 0.0134        | 0.0134       | -1.02       | -1.11        | -1.02   | -1.14           | -1.14           | 1.02            | -1.11      | <i>Rhbdf1</i>                   | rhomboid family 1 (Drosophila)                                                    | 0006355 // regulation of transcription, DNA-templated // inferred from electronic annotation                            |
| NM_001166029//NM_004581806             | 0.04582       | 0.04582      | -1.15       | 1.09         | 1.06    | -1.14           | -1.14           | 1.15            | 1.09       | <i>Zfp275</i>                   | zinc finger protein 275                                                           | 0006351 // transcription, DNA-templated // inferred from electronic annotation//0006355 // regulation of transcripti    |
| NM_001038625//NM_021372//X, 0.013385   | 0.0183489     | 0.01835      | 1.26        | 1.04         | 1.08    | -1.14           | -1.14           | 1.26            | 1.04       | <i>Sertad2</i>                  | SERTA domain containing 2                                                         | 0006457 // protein folding // inferred from electronic annotation//0007339 // binding of sperm to zona pellucida // i   |
| NM_009840                              |               | 0.013385     | -1.10       | 1.27         | 1.31    | -1.15           | -1.15           | 1.27            | 1.31       | <i>Cct8</i>                     | chaperonin containing Tcp1, subunit 8 (theta)                                     | 0006281 // DNA repair // inferred from electronic annotation//0006974 // cellular response to DNA damage stimulus       |
| NM_001081225//NM_944E-04               | 9.44E-04      | 9.44E-04     | -1.40       | -1.08        | 1.12    | -1.15           | -1.15           | 1.40            | -1.08      | <i>Fam178a</i>                  | family with sequence similarity 178, member A                                     | 0000122 // negative regulation of transcription from RNA polymerase II promoter // inferred from mutant phenotype//     |
| NM_001085492//XM_317E-04               | 3.17E-04      | 3.17E-04     | 1.03        | 1.03         | 1.34    | -1.15           | -1.15           | 1.03            | 1.03       | <i>Rere</i>                     | arginine glutamic acid dipeptide (REG) repeats                                    | 0007010 // cytoskeleton organization // inferred from mutant phenotype//0030855 // epithelial cell differentiation //   |
| NM_011526                              |               | 0.0031575    | 1.02        | 1.61         | 1.41    | -1.15           | -1.15           | 1.02            | 1.61       | <i>Tcpin</i>                    | collagen, type XVIII, alpha 1                                                     | 00                                                                                                                      |

| RefSeq       | Transcript ID  | p Tnfr 24 hr | p Tnfr 48hr | p Tnfr 72 hr | p Nfkb1 | ( FD Tnfr 24 hr ( | FD Tnfr 48 hr ( | FD Tnfr 72 hr ( | FD Nfkb1 | Gene Symbol                          | Gene Title                                                                       | Gene Ontology                                                                                                                 |
|--------------|----------------|--------------|-------------|--------------|---------|-------------------|-----------------|-----------------|----------|--------------------------------------|----------------------------------------------------------------------------------|-------------------------------------------------------------------------------------------------------------------------------|
| NM_001080819 | /NM_00110352   |              |             |              | 0.01104 | -1.01             | 1.02            | 1.17            | -1.19    | <i>Arid1a</i>                        | AT rich interactive domain 1A (SWI-like)                                         | 0000122 // negative regulation of transcription from RNA polymerase II promoter // inferred from direct assay // 0001         |
| NM_008491    |                | 0.004128     |             | 0.0110278    | 0.01103 | 1.67              | 1.43            | 1.37            | -1.20    | <i>Lcn2</i>                          | lipocalin 2                                                                      | 0002376 // immune system process // inferred from electronic annotation // 0006810 // transport // inferred from elec         |
| NM_001122958 | /NM_001122959  |              |             | 0.0142584    | 0.01426 | -1.04             | 1.01            | -1.01           | -1.20    | <i>Rad54l</i>                        | RAD54 like (S. cerevisiae)                                                       | 0000724 // double-strand break repair via homologous recombination // inferred from genetic interaction // 0000724            |
| NM_001039537 | /NM_00103169   |              |             |              | 0.03317 | 1.17              | -1.05           | -1.08           | -1.20    | <i>Lif</i>                           | leukemia inhibitory factor                                                       | 0001974 // blood vessel remodeling // inferred from genetic interaction // 0006955 // immune response // inferred fr          |
| NM_011063    | /NM_00108294   |              |             |              | 0.01083 | -1.08             | 1.24            | 1.13            | -1.21    | <i>Pea15a</i>                        | phosphoprotein enriched in astrocytes 15A                                        | 0000077 // DNA damage checkpoint // inferred from electronic annotation // 0006810 // transport // inferred from el           |
| NM_001267622 | /NM_00262599   |              | 0.0426134   |              | 0.04261 | -1.08             | -1.15           | 1.02            | -1.21    | <i>Ttc28</i>                         | tetratricopeptide repeat domain 28                                               | 0007049 // cell cycle // inferred from electronic annotation // 0007067 // mitotic nuclear division // inferred from elec     |
| NM_008057    |                | 0.0300766    |             |              | 0.03008 | -1.01             | -1.03           | 1.15            | -1.21    | <i>Fzd7</i>                          | frizzled homolog 7 (Drosophila)                                                  | 0006355 // regulation of transcription, DNA-templated // not recorded // 0007165 // signal transduction // inferred fr        |
| NM_007392    | /NM_00652606   |              | 0.0490329   |              | 0.04903 | -1.13             | 1.38            | 1.12            | -1.22    | <i>Acta2</i>                         | actin, alpha 2, smooth muscle, aorta                                             | 0006936 // muscle contraction // not recorded // 0008217 // regulation of blood vessel development // inferred from mutant ph |
| NM_178595    | /XR_374        | 0.044167     |             |              | 0.04417 | 1.10              | 1.04            | -1.10           | -1.23    | <i>Pthr1</i>                         | peptidyl-L-histidylase 1 homolog (S. cerevisiae)                                 | 0008152 // metabolic process // inferred from electronic annotation                                                           |
| NM_022022    | /NM_00354374   |              |             |              | 0.03544 | 1.05              | -1.06           | -1.09           | -1.23    | <i>Ube4b</i>                         | ubiquitin factor E4B                                                             | 0002009 // protein polyubiquitination // inferred from direct assay // 0000209 // protein polyubiquitination // inferre       |
| NM_001079686 | /NM_0008956    |              |             |              | 0.00896 | -1.12             | -1.00           | 1.06            | -1.23    | <i>Syne1</i>                         | spectrin repeat containing, nuclear envelope 1                                   | 0007030 // Golgi organization // not recorded // 0040023 // establishment of nucleus localization // inferred from mu         |
| NM_016966    | /NR_031        | 0.0299773    |             |              | 0.02998 | 1.30              | 1.03            | 1.36            | -1.23    | <i>Gm0896</i> // <i>Phgdh</i>        | 3-phosphoglycerate dehydrogenase pseudogene // 3-phosphoglycerate dehydrog       | 0006541 // glutamine metabolic process // inferred from mutant phenotype // 0008544 // glycine metabolic process /            |
| NM_001146707 | /NM_015781     | 0.0012336    | 0.0369231   |              | 0.00123 | -1.06             | -1.09           | -1.03           | -1.23    | <i>Gm4204</i> // <i>Nap11</i>        | nucleosome assembly protein 1-like 1 pseudogene // nucleosome assembly protei    | 0006334 // nucleosome assembly // inferred from electronic annotation // 0014010 // Schwann cell proliferation // in          |
| NM_021457    |                | 0.0017932    |             |              | 0.00179 | 1.05              | 1.16            | 1.16            | -1.23    | <i>Fzd1</i>                          | frizzled homolog 1 (Drosophila)                                                  | 0001934 // positive regulation of protein phosphorylation // inferred from mutant phenotype // 0003149 // membran             |
| NM_011416    | /NM_020351283  |              |             |              | 0.03513 | -1.10             | 1.23            | 1.18            | -1.24    | <i>Smarca2</i>                       | SMH/SNF related, matrix associated, actin dependent regulator of chromatin, subf | 0006325 // chromatin organization // traceable author statement // 0006334 // nucleosome assembly // traceable au             |
| NM_133229    |                | 0.0442596    |             |              | 0.04426 | -1.18             | -1.34           | -1.16           | -1.24    | <i>Riply3</i>                        | ripply3 homolog (zebrafish)                                                      | 0000122 // negative regulation of transcription from RNA polymerase II promoter // inferred from direct assay // 0006         |
| NM_021288    | /NR_000040     | 0.014        | 0.020285    | 0.0216754    | 0.014   | -1.02             | 1.01            | 1.21            | -1.24    | <i>Ttms</i> // <i>Ttms-ps</i>        | thymidylate synthase // thymidylate synthase, pseudogene                         | 0006206 // pyrimidine nucleobase metabolic process // inferred from electronic annotation // 0006231 // dTMP biosy            |
| NM_009697    | /NM_183261     | 0.0330305    |             |              | 0.03303 | 1.05              | -1.03           | 1.06            | -1.24    | <i>Nr2f2</i>                         | nuclear receptor subfamily 2, group F, member 2                                  | 0000122 // negative regulation of transcription from RNA polymerase II promoter // inferred from direct assay // 0000         |
| NM_001163847 | /NM_00118024   |              |             |              | 0.0118  | 1.11              | -1.03           | -1.09           | -1.25    | <i>Ntn3</i> // <i>Tbc1d24</i>        | netrin 3 // TBC1 domain family, member 24                                        | 0006355 // regulation of transcription, DNA-templated // not recorded // 0007409 // axonogenesis // traceable aut             |
| NM_001039129 | /NM_00105077   |              |             |              | 0.00323 | 1.53              | 1.18            | 1.20            | -1.25    | <i>Hnmpa1</i>                        | heterogeneous nuclear ribonucleoprotein A1 pseudogene                            | 0000380 // alternative mRNA splicing, via spliceosome // inferred from direct assay // 0006397 // mRNA processing //          |
| NM_133218    | /NM_0010087123 | 0.0344265    |             |              | 0.03443 | -1.24             | -1.06           | -1.26           | -1.26    | <i>Zfp704</i>                        | zinc finger protein 704                                                          | 0046872 // metal ion binding // inferred from electronic annotation                                                           |
| NM_029682    | /NM_0010475493 |              |             |              | 0.04755 | 1.03              | -1.10           | -1.09           | -1.27    | <i>Stambp1</i>                       | STAM binding protein like 1                                                      | 0006508 // proteolysis // inferred from electronic annotation                                                                 |
| NM_001276408 | /NM_0007884    | 0.0043191    |             |              | 0.00432 | 1.22              | 1.24            | 1.16            | -1.27    | <i>Fn1</i>                           | fibronectin 1                                                                    | 0001525 // angiogenesis // inferred from electronic annotation // 0001775 // cell activation // not recorded // 000193        |
| NM_197999    | /NM_001017728  |              |             |              | 0.00177 | -1.11             | 1.06            | 1.12            | -1.27    | <i>Ces2g</i>                         | carboxylesterase 2G                                                              | 0008152 // metabolic process // inferred from electronic annotation                                                           |
| NM_001110443 | /NM_001111044  | 0.0108745    |             |              | 0.01087 | -1.57             | 1.20            | 1.02            | -1.29    | <i>Serpinh1</i>                      | serine (or cysteine) peptidase inhibitor, clade H, member 1                      | 0003433 // chondrocyte development involved in endochondral bone morphogenesis // inferred from mutant phenot                 |
| NM_023850    | /NM_006500388  | 0.0050417    |             |              | 0.00504 | -1.03             | -1.24           | -1.06           | -1.30    | <i>Chst1</i>                         | carbohydrate (keratan sulfate Gal-6) sulfotransferase 1                          | 0005975 // carbohydrate metabolic process // inferred from electronic annotation // 0006012 // galactose metabolic            |
| NM_133918    | /NM_001024689  |              |             |              | 0.02469 | 1.14              | 1.07            | -1.06           | -1.30    | <i>Emilin1</i>                       | elastin microfibril interfacer 1                                                 | 0007155 // cell adhesion // inferred from electronic annotation // 0010811 // positive regulation of cell-substrate adh       |
| NM_008250    |                | 0.0036699    |             |              | 0.00367 | 1.54              | 1.09            | -1.30           | -1.31    | <i>Hlx</i>                           | H2.0-like homeobox                                                               | 0001889 // liver development // inferred from mutant phenotype // 0006351 // transcription, DNA-templated // infer            |
| NM_009363    |                | 0.0242412    |             |              | 0.02424 | -1.01             | 1.59            | 1.12            | -1.31    | <i>Tfj2</i>                          | trefoil factor 2 (spasmolytic protein 1)                                         | 0008284 // positive regulation of cell proliferation // inferred from genetic interaction // 0008284 // positive regulati     |
| NM_001136086 | /NM_001291455  | 0.0243615    |             |              | 0.02436 | -1.07             | 1.16            | 1.10            | -1.31    | <i>Dpysl3</i>                        | dihydropyrimidinase-like 3                                                       | 0007399 // nervous system development // inferred from direct assay // 0008152 // metabolic process // inferred fro           |
| NM_028232    | /NM_0010261336 | 0.0267846    |             |              | 0.02678 | -1.06             | -1.06           | 1.07            | -1.32    | <i>Sgol1</i>                         | shugoshin-like 1 (S. pombe)                                                      | 0007049 // cell cycle // inferred from electronic annotation // 0007059 // chromosome segregation // not recorded //          |
| NM_001122733 | /NM_00134443   | 0.0438303    | 0.0482141   |              | 0.04383 | 1.33              | 1.34            | 1.50            | -1.33    | <i>Kat</i>                           | kit oncogene                                                                     | 0000187 // activation of MAPK activity // not recorded // 0001541 // ovarian follicle development // inferred from mu         |
| NM_001171187 | /NM_00034257   |              |             |              | 0.00343 | 1.38              | 1.26            | 1.10            | -1.35    | <i>Mil</i>                           | myelin and lymphocyte protein, T cell differentiation protein                    | 0042552 // myelination // not recorded // 13902043 // positive regulation of extrinsic apoptotic signaling pathway via d      |
| NM_007743    |                | 0.0392629    |             |              | 0.03926 | -1.12             | 1.19            | 1.01            | -1.36    | <i>Col1a2</i>                        | collagen, type I, alpha 2                                                        | 0001501 // skeletal system development // not recorded // 0001568 // blood vessel development // not recorded //              |
| NM_008861    | /NM_0010468099 |              |             |              | 0.04681 | -1.20             | -1.13           | 1.08            | -1.37    | <i>Pkad2</i>                         | polycystic kidney disease 2                                                      | 0001658 // branching involved in ureteric bud morphogenesis // inferred from electronic annotation // 0001822 // kid          |
| NM_172924    | /NM_006511167  | 0.0201199    |             |              | 0.02012 | 1.09              | 1.19            | -1.05           | -1.37    | <i>Peak1</i>                         | pseudopodium-enriched atypical classin 1                                         | 0006468 // protein phosphorylation // not recorded // 0016310 // phosphorylation // inferred from electronic annota           |
| NM_026555    | /NM_006540986  | 0.0247598    |             |              | 0.02476 | -1.03             | 1.13            | -1.24           | -1.41    | <i>Rcn3</i>                          | reticulocalbin 3, EF-hand calcium binding domain                                 | 0005509 // calcium ion binding // inferred from electronic annotation // 0005515 // protein binding // inferred from el       |
| NM_012012    | /NM_006496862  | 0.0195294    |             |              | 0.01953 | 1.04              | 1.10            | -1.06           | -1.41    | <i>Exo1</i>                          | exonuclease 1                                                                    | 0002376 // immune system process // inferred from electronic annotation // 0002455 // humoral immune response //              |
| NM_134102    | /NM_001031144  | 0.0477859    |             |              | 0.03111 | 1.15              | -1.07           | 1.07            | -1.43    | <i>Pls1a</i>                         | phospholipase A1 member A                                                        | 0006629 // lipid metabolic process // inferred from electronic annotation // 0001604 // lipid catabolic process // infer      |
| NM_009791    | /NM_00184453   |              |             |              | 0.01845 | -1.32             | -1.22           | 1.12            | -1.44    | <i>Aspm</i>                          | asp (abnormal spindle)-like, microcephaly associated (Drosophila)                | 0001764 // neuron migration // inferred from genetic interaction // 0001764 // neuron migration // inferred from mul          |
| NM_001308327 | /NM_001308329  | 0.0079678    |             |              | 0.00797 | 1.13              | -1.10           | -1.15           | -1.45    | <i>Enp1</i>                          | ectonucleotide pyrophosphatase/phosphodiesterase 1                               | 0006091 // generation of precursor metabolites and energy // not recorded // 0006796 // phosphate-containing com              |
| NM_001159564 | /NM_021359     | 0.0385212    |             |              | 0.03852 | 1.35              | 1.58            | 1.44            | -1.45    | <i>Htb6</i>                          | integrin beta 6                                                                  | 0006954 // inflammatory response // inferred from mutant phenotype // 0007155 // cell adhesion // inferred from elec          |
| NM_009610    |                | 0.0093985    | 0.037104    |              | 0.0094  | -1.14             | 1.42            | 1.19            | -1.46    | <i>Actg2</i>                         | actin, gamma 2, smooth muscle, enteric                                           | 0010628 // positive regulation of gene expression // inferred from sequence or structural similarity // 0009031 // mes        |
| NM_026014    |                | 0.0059587    |             |              | 0.00596 | 1.24              | 1.12            | 1.00            | -1.46    | <i>Cdt1</i>                          | chromatin licensing and DNA replication factor 1                                 | 0000076 // DNA replication checkpoint // inferred from direct assay // 0000076 // DNA replication checkpoint // not r         |
| NM_013811    | /NM_006523588  | 0.0173194    |             |              | 0.01732 | 1.05              | -1.06           | -1.04           | -1.47    | <i>Dnah8</i>                         | dynein, axonemal, heavy chain 8                                                  | 0000178 // microtubule-based movement // inferred from electronic annotation // 0008152 // metabolic process // in            |
| NM_001289780 | /NM_00351398   | 0.0019182    |             |              | 0.00192 | 1.05              | 1.21            | 1.04            | -1.47    | <i>Pus7</i>                          | pseudouridylylase 7 homolog (S. cerevisiae)                                      | 0001522 // pseudouridine synthesis // inferred from electronic annotation // 0001522 // pseudouridine synthesis // --         |
| NM_010721    |                | 0.0280595    |             |              | 0.02806 | 1.10              | 1.16            | 1.03            | -1.47    | <i>Lmnb1</i>                         | lamin B1                                                                         | 0031662 // positive regulation of cyclin-dependent protein serine/threonine kinase activity involved in G2/M transiti         |
| NM_013462    | /NM_006508987  | 0.03375      |             |              | 0.03375 | 1.05              | -1.40           | -1.17           | -1.48    | <i>Adrb3</i>                         | adrenergic receptor, beta 3                                                      | 0002024 // diet induced thermogenesis // inferred from genetic interaction // 0002025 // vasodilation by norepinephr          |
| NM_001308535 | /NM_00404131   |              |             |              | 0.04041 | 1.20              | 1.12            | 1.15            | -1.49    | <i>Il2rg</i>                         | interleukin 2 receptor, gamma chain                                              | 0010468 // regulation of gene expression // inferred from mutant phenotype // 0010628 // positive regulation of gene          |
| NM_010516    |                | 4.41E-04     |             |              | 0.01051 | 2.94              | 1.10            | 1.08            | -1.49    | <i>Cyrl6</i>                         | cysteine rich protein 61                                                         | 0001558 // regulation of cell growth // inferred from electronic annotation // 0007059 // chromosome segregation // not rec   |
| NM_030707    | /XR_871926     | 0.0498891    |             |              | 0.04989 | -1.11             | 1.38            | 1.50            | -1.51    | <i>D17H6556E.5</i>                   | DNA segment, Chr 17, human D6556E 5                                              | 0019058 // viral life cycle // inferred from electronic annotation                                                            |
| NM_001033217 | /NM_006520264  | 0.0161053    |             |              | 0.01611 | 1.22              | -1.28           | 1.24            | -1.54    | <i>Prickle1</i>                      | prickle homolog 1 (Drosophila)                                                   | 0001843 // neural tube closure // not recorded // 0006606 // protein import into nucleus // not recorded // 0031398 //        |
| NM_001159299 | /NM_00073735   |              |             |              | 0.00737 | 1.45              | 1.53            | 1.02            | -1.59    | <i>Hth4</i>                          | inter alpha-trypsin inhibitor, heavy chain 4                                     | 0006953 // acute-phase response // inferred from electronic annotation // 0010466 // negative regulation of peptidas          |
| NM_019568    | /NM_0039746    |              |             |              | 0.03975 | 1.84              | 1.60            | 1.11            | -1.65    | <i>Cxcl14</i>                        | chemokine (C-X-C motif) ligand 14                                                | 0006955 // immune response // inferred from electronic annotation // 0045662 // negative regulation of myoblast dif           |
| NM_010790    | /NM_006537640  | 0.0169902    |             |              | 0.01699 | 1.16              | 1.28            | 1.07            | -1.68    | <i>Melk</i>                          | maternal embryonic leucine zipper kinase                                         | 0006468 // protein phosphorylation // inferred from electronic annotation // 0006915 // apoptotic process // not rec          |
| NM_172505    | /NM_00072999   |              |             |              | 0.0073  | 1.14              | 1.46            | 1.45            | -1.69    | <i>Hjurp</i>                         | Holliday junction recognition protein                                            | 0007049 // cell cycle // inferred from electronic annotation // 0007059 // chromosome segregation // not recorded //          |
| NM_010474    |                | 0.0356842    |             |              | 0.03568 | 1.36              | -1.38           | 1.15            | -1.73    | <i>Hs3t1</i>                         | heparan sulfate (glucosamine) 3-O-sulfotransferase 1                             | 0008152 // metabolic process // inferred from electronic annotation                                                           |
| NM_011607    | /NM_00087337   | 0.0063502    |             |              | 0.00635 | 1.30              | 1.57            | 1.11            | -1.79    | <i>Tnc</i>                           | tenascin C                                                                       | 0001649 // osteoblast differentiation // not recorded // 0007155 // cell adhesion // inferred from electronic annotatio       |
| NM_011121    |                | 0.0320034    |             |              | 0.032   | 1.03              | -1.04           | 1.04            | -1.80    | <i>Plk1</i>                          | polo-like kinase 1                                                               | 0000070 // mitotic sister chromatid segregation // not recorded // 0000086 // G2/M transition of mitotic cell cycle // r      |
| NM_010766    |                | 0.0334347    |             |              | 0.03343 | 1.21              | -1.26           | -1.04           | -1.86    | <i>Marco</i>                         | macrophage receptor with collagenous structure                                   | 0002376 // immune system process // inferred from electronic annotation // 0006897 // endocytosis // inferred from            |
| NM_010104    |                | 0.01573      |             |              | 0.01573 | -1.17             | 1.25            | -1.14           | -1.96    | <i>Edn1</i>                          | endothelin 1                                                                     | 0000122 // negative regulation of transcription from RNA polymerase II promoter // not recorded // 0001501 // skelet          |
| NM_010809    |                | 0.0118081    | 0.0270064   |              | 0.01181 | -1.37             | 1.03            | -1.19           | -1.97    | <i>Mmp3</i>                          | matrix metalloproteinase 3                                                       | 0006508 // proteolysis // inferred from mutant phenotype // 0006508 // proteolysis // not recorded // 0010727 // nee          |
| NM_009364    | /NM_001012514  | 0.017611     |             |              | 0.01761 | 1.72              | 1.30            | 1.02            | -2.02    | <i>Tjp2</i>                          | tissue factor pathway inhibitor 2                                                | 0007596 // blood coagulation // inferred from electronic annotation // 0007599 // hemostasis // inferred from elect           |
| NM_010295    | /NM_006510812  | 0.0441905    | 0.0416133   |              | 0.04419 | 1.17              | 1.29            | 1.18            | -2.38    | <i>Cic</i>                           | glutamate-cysteine ligase, catalytic subunit                                     | 0006534 // cysteine metabolic process // not recorded // 0006536 // glutamate metabolic process // not recorded // K          |
| NM_00117544  | /NM_00228937   |              |             |              | 0.02289 | 1.48              | 1.32            | -1.20           | -2.42    | <i>Hist1h2ao</i> // <i>Hist1h2ap</i> | histone cluster 1, H2ao // histone cluster 1, H2ap                               | 0006325 // chromatin organization // not recorded // 0006342 // chromatin silencing // not recorded // 0008285 // m           |
| NM_009264    |                | 0.0042823    |             |              | 0.00428 | 2.18              | 1.35            | -1.13           | -2.52    | <i>Spr1a</i>                         | small proline-rich protein 1A                                                    | 0018149 // peptide cross-linking // not recorded // 0003012 // keratinocyte differentiation // not recorded // 0003424        |
| NM_025748    | /NM_00136061   | 0.01361      |             |              | 0.01361 | 1.09              | -1.05           | -1.08           | -2.63    | <i>Adat1</i>                         | adenosine deaminase, tRNA-specific 2                                             | 0002100 // tRNA wobble adenosine to inosine editing // inferred from electronic annotation // 0006400 // tRNA modif           |
| NM_001131054 | /NM_013917     | 0.0144328    | 2.02E-04    | 0.01443      | 0.01443 | -4.12             | -3.09           | -1.84           | -2.81    | <i>Pttg1</i>                         | pituitary tumor-transforming gene 1                                              | 0001558 // regulation of cell growth // not recorded // 000                                                                   |

**Table S8. Common genes altered by O3 in Tnfr-, Tlr4-, and Nfkb1-dependent manner.**

Venn Diagram analysis of Tnfr-dependent genes (n=2180, pooled from 24-72 hr O3), Tlr4-dependent genes (n=2320, pooled from 24- and 48-hr O3; Bauer et al. 2011 Env Health Perspect, GEO#GSE20715) and Nfkb1-dependent genes (n=2397, 48-hr O3).

Tlr4 mutant strain-C3H/HeJ (HeJ), Tlr4 normal strain-C3H/HeOJ (OJ).

Fold difference (FD); positive-higher in KO or HeJ-O3, negative-lower in KO or HeJ-O3, compared to corresponding WT or OJ-O3.

| RefSeq Transcript ID    | Tnfr FD 24 hr | Tnfr FD 48 hr | Tnfr FD 72 hr | Tlr4 FD 24 hr | Tlr4 FD 48 hr | Nfkb1 FD 48 hr | Gene Symbol                  | Gene Title                                                                                        | Gene Ontology Biological Process                                                                |
|-------------------------|---------------|---------------|---------------|---------------|---------------|----------------|------------------------------|---------------------------------------------------------------------------------------------------|-------------------------------------------------------------------------------------------------|
| NM_001252332//NM_001212 | 1.02          | 1.18          | 1.16          | -1.05         | -1.02         | -1.07          | <i>Sept8</i>                 | septin 8                                                                                          | 0000166 // nucleotide binding // inferred from electronic annotation//0005515 // protein bin    |
| NM_001177945//NM_00111  | -1.10         | -1.01         | 1.02          | -1.12         | -1.01         | 1.19           | <i>Aamdc</i>                 | adipogenesis associated Mth938 domain containing                                                  | 0043066 // negative regulation of apoptotic process // inferred from mutant phenotype//004      |
| NM_001038587//NM_00114  | 1.31          | 1.19          | 1.09          | 1.06          | -1.24         | 1.12           | <i>Adar</i>                  | adenosine deaminase, RNA-specific                                                                 | 0001649 // osteoblast differentiation // inferred from mutant phenotype//0001701 // in uter     |
| NM_025748//XM_0112432C  | 1.09          | -1.05         | -1.08         | 1.08          | 1.12          | -2.63          | <i>Adat2</i>                 | adenosine deaminase, tRNA-specific 2                                                              | 0002100 // tRNA wobble adenosine to inosine editing // inferred from electronic annotation//    |
| NM_007440//XM_01124867  | -1.04         | -1.25         | -1.01         | 1.43          | 1.00          | 1.42           | <i>Alox12</i>                | arachidonate 12-lipoxygenase                                                                      | 0006629 // lipid metabolic process // inferred from electronic annotation//0006631 // fatty a   |
| NM_001286040//NM_00121  | -1.15         | -1.11         | 1.00          | 1.04          | -1.03         | -1.11          | <i>Anks1</i>                 | ankyrin repeat and SAM domain containing 1                                                        | 0006929 // substrate-dependent cell migration // inferred from direct assay//0016322 // neu     |
| NM_018829//XM_0065192E  | 1.08          | 1.22          | 1.15          | -1.04         | 1.03          | -1.15          | <i>Ap3m1</i>                 | adaptor-related protein complex 3, mu 1 subunit                                                   | 0006810 // transport // inferred from electronic annotation//0006886 // intracellular protein   |
| NM_001314013//NM_05301  | 1.06          | 1.10          | 1.15          | -1.05         | 1.13          | 1.07           | <i>Atg5</i>                  | autophagy related 5                                                                               | 0000045 // autophagosome assembly // inferred from mutant phenotype//0000422 // mitop           |
| NM_007591               | -1.11         | 1.25          | 1.22          | -1.38         | 1.05          | -1.11          | <i>Calr</i>                  | calreticulin                                                                                      | 0000122 // negative regulation of transcription from RNA polymerase II promoter // not recor    |
| NM_001080126//NM_00121  | 1.24          | 1.15          | 1.17          | 1.06          | 1.15          | -1.13          | <i>Casp8</i>                 | caspase 8                                                                                         | 0001525 // angiogenesis // inferred from mutant phenotype//0001841 // neural tube formati       |
| NM_001159738//NM_01691  | -1.33         | -1.18         | -1.22         | -1.04         | 1.53          | 1.56           | <i>Ccl20</i>                 | chemokine (C-C motif) ligand 20                                                                   | 002548 // monocyte chemotaxis // --//0006935 // chemotaxis // not recorded//0006954 //          |
| NM_001111099//NM_00761  | -1.83         | -1.03         | -1.41         | 2.20          | 1.26          | 1.78           | <i>Cdkn1a</i>                | cyclin-dependent kinase inhibitor 1A (P21)                                                        | 0000079 // regulation of cyclin-dependent protein serine/threonine kinase activity // inferred  |
| NM_016675//XM_0065284E  | 1.14          | 1.00          | -1.01         | 1.04          | 1.16          | 1.25           | <i>Cldn2</i>                 | claudin 2                                                                                         | 0016338 // calcium-independent cell-cell adhesion via plasma membrane cell-adhesion molec       |
| NM_001252479//NM_13391  | 1.19          | -1.03         | -1.19         | 1.05          | 1.20          | 1.24           | <i>Cmtm7</i>                 | CKLF-like MARVEL transmembrane domain containing 7                                                | 0002337 // B-1a B cell differentiation // inferred from mutant phenotype//0006935 // chemo      |
| NM_001037859//NM_00771  | 1.03          | -1.12         | -1.02         | -1.10         | -1.10         | 1.22           | <i>Csf1r</i>                 | colony stimulating factor 1 receptor                                                              | 0001934 // positive regulation of protein phosphorylation // not recorded//0002376 // immu      |
| NM_001136086//NM_00121  | -1.07         | 1.16          | 1.10          | 1.04          | 1.23          | -1.31          | <i>Dpysl3</i>                | dihydropyrimidinase-like 3                                                                        | 0007399 // nervous system development // inferred from direct assay//0008152 // metaboli        |
| NM_010104               | -1.17         | 1.25          | -1.14         | 1.62          | 1.18          | -1.96          | <i>Edn1</i>                  | endothelin 1                                                                                      | 0000122 // negative regulation of transcription from RNA polymerase II promoter // not recor    |
| NM_010485//XM_0065086E  | -1.02         | 1.20          | 1.15          | -1.11         | -1.03         | -1.10          | <i>Elavl1</i>                | ELAV (embryonic lethal, abnormal vision)-like 1 (Hu antigen R)                                    | 0006417 // regulation of translation // not recorded//0045727 // positive regulation of transla |
| NM_001136077//NM_00121  | -1.06         | -1.00         | 1.04          | 1.05          | -1.16         | 1.10           | <i>Enpp2</i>                 | ectonucleotide pyrophosphatase/phosphodiesterase 2                                                | 0001953 // negative regulation of cell-matrix adhesion // not recorded//0006629 // lipid met    |
| NM_001081225//NM_17261  | -1.40         | -1.08         | 1.12          | -1.24         | -1.20         | -1.15          | <i>Fam178a</i>               | family with sequence similarity 178, member A                                                     | 0006281 // DNA repair // inferred from electronic annotation//0006974 // cellular response t    |
| NM_025912//XM_0065000E  | 1.02          | -1.01         | -1.09         | 1.08          | 1.17          | 1.10           | <i>Fam210b</i>               | family with sequence similarity 210, member B                                                     | 0016020 // membrane // inferred from electronic annotation//0016021 // integral componen        |
| NM_008086               | -1.00         | -1.12         | -1.06         | -1.17         | -1.04         | 1.10           | <i>Gas1</i>                  | growth arrest specific 1                                                                          | 0002053 // positive regulation of mesenchymal cell proliferation // inferred from mutant phen   |
| NM_001039129//NM_00111  | 1.53          | 1.18          | 1.20          | 1.10          | -1.18         | -1.25          | <i>Hnnpa1</i>                | heterogeneous nuclear ribonucleoprotein A1 pseudogene//predicted gene 5803//heterogeneous nuclea  | 0000380 // alternative mRNA splicing, via spliceosome // inferred from direct assay//0006391    |
| XM_011238903//XM_01123  | 2.61          | 3.75          | 3.71          | 1.18          | -1.42         | 1.12           | <i>Gm37416//Gm39743//Gm3</i> | predicted gene, 37416//predicted gene, 39743//predicted gene, 40611//predicted gene, 40814//predi | 0006278 // RNA-dependent DNA replication // inferred from electronic annotation//0008152        |
| NM_001080707//NM_00111  | -1.21         | -1.10         | 1.62          | -1.30         | -1.49         | 1.14           | <i>Gpr155</i>                | G protein-coupled receptor 155                                                                    | 0035556 // intracellular signal transduction // inferred from electronic annotation//0050890 ,  |
| NM_153071//XM_0112431E  | -1.10         | -1.02         | -1.07         | -1.14         | -1.43         | 1.33           | <i>Gprc6a</i>                | G protein-coupled receptor, family C, group 6, member A                                           | 0007165 // signal transduction // inferred from electronic annotation//0007186 // G-protein i   |
| NM_010344               | 1.29          | 1.07          | 1.10          | 1.07          | 1.15          | 1.16           | <i>Gsr</i>                   | glutathione reductase                                                                             | 0006749 // glutathione metabolic process // inferred by curator//0006749 // glutathione met     |
| NM_026113//XM_00651282  | 1.14          | 1.30          | 1.08          | -1.08         | 1.27          | -1.02          | <i>Gtf3c6</i>                | general transcription factor IIIC, polypeptide 6, alpha                                           | 0006351 // transcription, DNA-templated // not recorded//0006383 // transcription from RN       |
| NM_022331//XM_0065312E  | -1.56         | 1.12          | -1.09         | -1.22         | -1.48         | 1.21           | <i>Herpud1</i>               | homocysteine-inducible, endoplasmic reticulum stress-inducible, ubiquitin-like domain member 1    | 0006511 // ubiquitin-dependent protein catabolic process // inferred from direct assay//0006    |
| NM_019447//XM_0065040E  | -1.17         | -1.16         | 1.03          | 1.09          | -1.20         | -1.07          | <i>Hgfac</i>                 | hepatocyte growth factor activator                                                                | 0006508 // proteolysis // inferred from electronic annotation                                   |
| NM_010474               | 1.36          | -1.38         | 1.15          | 1.36          | 1.39          | -1.73          | <i>Hs3st1</i>                | heparan sulfate (glucosamine) 3-O-sulfotransferase 1                                              | 0008152 // metabolic process // inferred from electronic annotation                             |
| NM_172015//XM_00651682  | -1.05         | 1.08          | 1.02          | -1.12         | 1.06          | -1.10          | <i>Iars</i>                  | isoleucine-tRNA synthetase                                                                        | 0001649 // osteoblast differentiation // not recorded//0006412 // translation // inferred fr    |
| NM_010501//XM_0112471E  | 1.29          | -1.08         | 1.28          | -1.13         | 1.07          | 1.41           | <i>Ifit3</i>                 | interferon-induced protein with tetratricopeptide repeats 3                                       | 0002376 // immune system process // inferred from electronic annotation//0008285 // negat       |
| NM_001308535//NM_01351  | 1.20          | 1.12          | 1.15          | -1.06         | 1.02          | -1.49          | <i>Il2rg</i>                 | interleukin 2 receptor, gamma chain                                                               | 0010468 // regulation of gene expression // inferred from mutant phenotype//0010628 // po       |
| NM_008403//XM_0065149E  | 1.14          | 1.08          | -1.02         | 1.11          | 1.14          | -1.01          | <i>Irgb1bp1</i>              | integrin beta 1 binding protein 1                                                                 | 0001525 // angiogenesis // inferred from electronic annotation//0002043 // blood vessel end     |
| NM_001159299//NM_00121  | 1.45          | 1.53          | 1.02          | -1.19         | 1.14          | -1.59          | <i>Ithi4</i>                 | inter alpha-trypsin inhibitor, heavy chain 4                                                      | 0006953 // acute-phase response // inferred from electronic annotation//0010466 // negativ      |
| NM_008409               | 1.13          | 1.11          | 1.12          | 1.04          | -1.03         | -1.03          | <i>Itm2a</i>                 | integral membrane protein 2A                                                                      | 0005515 // protein binding // inferred from electronic annotation                               |
| NM_031248               | 1.06          | 1.12          | 1.09          | -1.03         | 1.14          | 1.05           | <i>Lamtor2</i>               | late endosomal/lysosomal adaptor, MAPK and MTOR activator 2                                       | 0000186 // activation of MAPKK activity // inferred from direct assay//0016049 // cell growth   |
| NM_008491               | 1.67          | 1.43          | 1.37          | -1.10         | 1.54          | -1.20          | <i>Lcn2</i>                  | lipocalin 2                                                                                       | 0002376 // immune system process // inferred from electronic annotation//0006810 // trans       |
| NM_025828               | -1.02         | 1.16          | 1.09          | -1.06         | -1.13         | -1.06          | <i>Lman2</i>                 | lectin, mannose-binding 2                                                                         | 0006810 // transport // inferred from electronic annotation//0006890 // retrograde vesicle-tr   |
| NM_001164885//NM_02281  | -1.24         | -1.06         | 1.16          | 1.02          | -1.18         | 1.27           | <i>Lpin2</i>                 | lipin 2                                                                                           | 0006351 // transcription, DNA-templated // inferred from electronic annotation//0006355 //      |
| NM_010766               | 1.21          | -1.26         | -1.04         | 2.27          | 4.07          | -1.86          | <i>Marco</i>                 | macrophage receptor with collagenous structure                                                    | 0002376 // immune system process // inferred from electronic annotation//0006897 // endo        |
| NM_001081392//NM_13381  | -1.03         | 1.02          | -1.05         | -1.08         | 1.10          | -1.05          | <i>Mdn1</i>                  | midasin homolog (yeast)                                                                           | 0000027 // ribosomal large subunit assembly // inferred from electronic annotation//000815      |
| NM_025578               | -1.02         | 1.12          | 1.00          | -1.04         | 1.12          | -1.08          | <i>Mrs25</i>                 | mitochondrial ribosomal protein S25                                                               | 0032543 // mitochondrial translation // inferred by curator                                     |
| NM_001008542//NM_00101  | 1.04          | -1.11         | 1.07          | 1.09          | -1.13         | -1.07          | <i>Mxi1</i>                  | MAX interactor 1, dimerization protein                                                            | 0000122 // negative regulation of transcription from RNA polymerase II promoter // inferred f   |
| NM_026526//XM_0065194E  | 1.06          | 1.11          | -1.02         | -1.05         | 1.07          | -1.02          | <i>N6amt2</i>                | N-6 adenine-specific DNA methyltransferase 2 (putative)                                           | 0032259 // methylation // inferred from electronic annotation                                   |
| NM_026554               | -1.01         | 1.26          | 1.16          | -1.22         | 1.10          | -1.12          | <i>Ncbp2</i>                 | nuclear cap binding protein subunit 2                                                             | 0000184 // nuclear-transcribed mRNA catabolic process, nonsense-mediated decay // not rec       |
| NM_001286037//NM_01081  | 1.45          | 1.09          | -1.14         | -1.06         | -1.38         | 1.19           | <i>Ncf1</i>                  | neutrophil cytosolic factor 1                                                                     | 0001878 // response to yeast // inferred from mutant phenotype//0001909 // leukocyte med        |
| NM_010880//XM_0065292E  | 1.44          | 1.29          | 1.45          | 1.02          | 1.04          | -1.19          | <i>Ncl</i>                   | nucleolin                                                                                         | 0001525 // angiogenesis // not recorded//0006897 // endocytosis // not recorded//0007283        |
| NM_134010//XM_00651301  | 1.09          | 1.12          | 1.08          | 1.06          | 1.10          | -1.10          | <i>Nup107</i>                | nucleoporin 107                                                                                   | 0000973 // posttranscriptional tethering of RNA polymerase II gene DNA at nuclear periphery     |
| NM_011119               | 1.08          | 1.01          | 1.17          | -1.02         | 1.12          | -1.12          | <i>Pa2g4</i>                 | proliferation-associated 2G4                                                                      | 0006351 // transcription, DNA-templated // inferred from electronic annotation//0006355 //      |
| NM_172924//XM_0065111E  | 1.09          | 1.19          | -1.05         | 1.02          | -1.15         | -1.37          | <i>Peak1</i>                 | pseudopodium-enriched atypical kinase 1                                                           | 0006468 // protein phosphorylation // not recorded//0016310 // phosphorylation // inferre       |
| NM_011072               | 1.26          | 1.05          | -1.13         | -1.17         | 1.17          | -1.07          | <i>Pfn1</i>                  | profilin 1                                                                                        | 0001843 // neural tube closure // inferred from genetic interaction//0006357 // regulation of   |
| NM_133942//XM_00650714  | -1.14         | 1.11          | 1.07          | -1.02         | 1.20          | -1.11          | <i>Plekha1</i>               | pleckstrin homology domain containing, family A (phosphoinositide binding specific) member 1      | 0001553 // luteinization // inferred from genetic interaction//0007283 // spermatogenesis //    |
| NM_008947               | 1.11          | 1.36          | 1.42          | 1.02          | 1.32          | -1.05          | <i>Psmc1</i>                 | protease (prosome, macropain) 26S subunit, ATPase 1                                               | 0030163 // protein catabolic process // inferred from electronic annotation//0030433 // ER-a    |
| NM_011189               | 1.22          | 1.05          | 1.31          | -1.06         | 1.17          | 1.22           | <i>Psme1</i>                 | proteasome (prosome, macropain) activator subunit 1 (PA28 alpha)                                  | 0002479 // antigen processing and presentation of exogenous peptide antigen via MHC class I     |
| NM_001085492//XM_00651  | -1.03         | 1.03          | 1.34          | -1.24         | -1.40         | -1.15          | <i>Rere</i>                  | arginine glutamic acid dipeptidase (RE) repeats                                                   | 0000122 // negative regulation of transcription from RNA polymerase II promoter // inferred f   |
| NM_133933               | -1.06         | 1.18          | -1.12         | -1.05         | 1.27          | -1.10          | <i>Rpn1</i>                  | ribophorin 1                                                                                      | 0006486 // protein glycosylation // inferred from electronic annotation//0018279 // protein t   |
| NM_001166506//NM_00111  | -1.18         | -1.02         | 1.06          | -1.01         | -1.07         | -1.03          | <i>Sec14l1</i>               | SEC14-like lipid binding 1                                                                        | 0006810 // transport // inferred from electronic annotation                                     |
| NM_001164059//NM_01134  | 1.72          | -1.04         | -1.05         | 1.10          | -1.18         | 1.91           | <i>Sell</i>                  | selectin, lymphocyte                                                                              | 0007155 // cell adhesion // inferred from electronic annotation//0033198 // response to ATP     |
| NM_009151//XM_00653022  | 1.21          | -1.01         | -1.06         | 1.23          | -1.02         | 1.35           | <i>Selplg</i>                | selectin, platelet (p-selectin) ligand                                                            | 0007155 // cell adhesion // inferred from electronic annotation//0050901 // leukocyte tether    |
| NM_145156//XM_0065270E  | 1.12          | -1.09         | -1.11         | 1.17          | 1.05          | 1.10           | <i>Slc25a28</i>              | solute carrier family 25, member 28                                                               | 0006810 // transport // inferred from electronic annotation//0006811 // ion transport // infer  |
| NM_021535               | 1.22          | 1.24          | 1.15          | 1.03          | 1.12          | -1.06          | <i>Smu1</i>                  | smu-1 suppressor of mec-8 and unc-52 homolog (C. elegans)                                         | 0005634 // nucleus // inferred from electronic annotation//0005737 // cytoplasm // inferred     |
| NM_144918               | 1.14          | 1.10          | -1.00         | -1.06         | 1.13          | -1.10          | <i>Smyd5</i>                 | SET and MYND domain containing 5                                                                  | 0032259 // methylation // inferred from electronic annotation                                   |
| NM_001110310//NM_00111  | 1.03          | 1.08          | 1.06          | -1.08         | 1.07          | -1.07          | <i>Snx12</i>                 | sorting nexin 12                                                                                  | 0006810 // transport // inferred from electronic annotation//0006897 // endocytosis // not r    |
| NM_009264               | 2.18          | 1.35          | -1.13         | 1.87          | 2.22          | -2.52          | <i>Sprr1a</i>                | small proline-rich protein 1A                                                                     | 0018149 // peptide cross-linking // not recorded//0030216 // keratinocyte differentiation // r  |
| NM_011512//XM_00649782  | 1.10          | 1.05          | 1.18          | 1.00          | 1.12          | 1.03           | <i>Surf4</i>                 | surfeit gene 4                                                                                    | 0007030 // Golgi organization // not recorded//0010638 // positive regulation of organelle or   |
| NM_001311156//NM_13391  | 1.10          | -1.02         | 1.05          | 1.09          | 1.15          | 1.16           | <i>Tcta</i>                  | T cell leukemia translocation altered gene                                                        | 0016020 // membrane // inferred from electronic annotation//0016021 // integral componen        |
| NM_017376//NM_153484//  | 1.11          | 1.11          | 1.74          | -1.43         | -1.66         | -1.12          | <i>Tef</i>                   | thyrotroph embryonic factor                                                                       | 0006351 // transcription, DNA-templated // inferred from electronic annotation//0006355 //      |
| NM_009364//XM_00650504  | 1.72          | 1.30          | 1.02          | -1.03         | 1.20          | -2.02          | <i>Tfpi2</i>                 | tissue factor pathway inhibitor 2                                                                 | 0007596 // blood coagulation // inferred from electronic annotation//0007599 // hemostasis      |
| NM_011607//XM_00653777  | 1.30          | 1.57          | 1.11          | -1.35         | 1.70          | -1.79          | <i>Tnc</i>                   | tenascin C                                                                                        | 0001649 // osteoblast differentiation // not recorded//0007155 // cell adhesion // inferred fr  |
| NM_009396//XM_0065157E  | 1.09          | -1.20         | 1.02          | 1.10          | 1.32          | 1.40           | <i>Tnfrsf25</i>              | tumor necrosis factor, alpha-induced protein 2                                                    | 0001525 // angiogenesis // inferred from electronic annotation//0006887 // exocytosis // not    |
| NM_011653               | -1.00         | 1.09          | -1.01         | 1.03          | 1.24          | -1.06          | <i>Tuba1a</i>                | tubulin, alpha 1A                                                                                 | 0007017 // microtubule-based process // inferred from electronic annotation//0008152 // mi      |
